# Supplementary material for: Plasma proteomic biomarker signature of age predicts health and life span
Source: eLife. 2020 Nov 19;9:e61073. doi: 10.7554/eLife.61073 (PMC7723412; doi:10.7554/eLife.61073)
Supplement: Figure 1—source data 1. [file elife-61073-fig1-data1.xlsx]

## Sheet: sheet1
		Base Model				Adjusted for chronic disease			Annotation
SomaId	N	beta	SE	B-H FDR	var explained	beta	se	B-H FDR	Target	EntrezGeneSymbol	UniProt
SL002704	990	0.0213568	0.000653708	3.96248e-156	0.502092	0.0198269	0.000732737	6.6846e-118	PTN	PTN	P21246
SL003869	994	0.0223171	0.00069967	2.51582e-151	0.506165	0.0198172	0.000772985	9.57272e-109	MIC-1	GDF15	Q99988
SL009324	995	0.0111891	0.000441815	7.01541e-107	0.386366	0.0101538	0.000494955	7.0516e-76	FSTL3	FSTL3	O95633
SL009400	995	0.0139997	0.000553401	8.06647e-107	0.382798	0.0131375	0.000623536	2.71115e-79	CRDL1	CHRDL1	Q9BU40
SL010390	993	0.0126414	0.00050135	2.56538e-106	0.389982	0.011923	0.000565146	2.40195e-79	URB	CCDC80	Q76M96
SL000522	995	0.0227207	0.000954915	5.20784e-97	0.360376	0.0193493	0.00105584	9.53842e-63	MMP-12	MMP12	P39900
SL000283	993	0.0131138	0.000553062	1.69621e-96	0.362293	0.0113355	0.000613325	1.59685e-63	b2-Microglobulin	B2M	P61769
SL002785	996	0.0390192	0.00166558	9.63449e-95	0.353646	0.0342641	0.00185686	2.00274e-63	N-terminal pro-BNP	NPPB	P16860
SL001777	992	0.0099743	0.000429455	2.10818e-93	0.352715	0.00867649	0.000477385	7.32531e-62	Cystatin C	CST3	P01034
SL001992	992	0.0116491	0.000517168	6.88358e-89	0.338939	0.00985952	0.00057239	2.27543e-56	TNF sR-I	TNFRSF1A	P19438
SL000466	994	0.0217487	0.000974317	1.189e-87	0.334481	0.0201414	0.00109659	6.07098e-63	IGFBP-2	IGFBP2	P18065
SL006527	994	0.0105567	0.000475043	4.78385e-87	0.328012	0.0101188	0.000536341	8.7466e-66	FBLN3	EFEMP1	Q12805
SL000428	997	0.0329561	0.0014854	6.75513e-87	0.187854	0.0353487	0.00167407	2.16952e-79	FSH	CGA FSHB	P01215, P01225
SL011888	990	0.00974508	0.000445625	8.94936e-85	0.324968	0.00851709	0.000498386	1.32715e-55	SMOC1	SMOC1	Q9H4F8
SL002654	992	0.0108716	0.000499246	3.04493e-84	0.324231	0.00908413	0.000552075	4.37657e-52	Epithelial cell kinase	EPHA2	P29317
SL006910	991	-0.0136245	0.000640931	5.97729e-81	0.310691	-0.0127285	0.000722716	1.41663e-58	Cathepsin V	CTSV	O60911
SL008099	995	0.0146416	0.00070846	2.68454e-77	0.297949	0.0124867	0.000788	8.84895e-49	CAPG	CAPG	P40121
SL005230	996	0.00920265	0.000452805	3.48203e-75	0.293049	0.00785622	0.000504156	2.21563e-47	UNC5H3	UNC5C	O95185
SL007033	993	0.0087891	0.000437951	1.38417e-73	0.288824	0.00789914	0.000492567	8.40659e-50	LTBP4	LTBP4	Q8N2S1
SL002506	991	0.009071	0.000457276	3.76527e-72	0.273219	0.00811035	0.0005126	1.20223e-48	suPAR	PLAUR	Q03405
SL008178	995	0.00978872	0.000503304	7.9393e-70	0.262531	0.00933289	0.000568466	6.41496e-52	DERM	DPT	Q07507
SL008631	992	0.00868518	0.000446536	7.99715e-70	0.276526	0.00708028	0.000493301	5.04313e-41	DSC2	DSC2	Q02487
SL009412	995	0.00882025	0.000454217	1.11183e-69	0.274503	0.00855169	0.000513633	3.74255e-53	DKK3	DKK3	Q9UBP4
SL001800	995	0.0102931	0.000532846	4.44793e-69	0.273337	0.00864501	0.000592431	3.20626e-42	TNF sR-II	TNFRSF1B	P20333
SL004557	992	0.00729497	0.000379542	1.77978e-68	0.268213	0.0061044	0.000421378	1.10539e-41	CD59	CD59	P13987
SL005115	993	0.00880372	0.000460743	8.12309e-68	0.259227	0.00794537	0.000518171	4.63439e-46	Spondin-1	SPON1	Q9HCB6
SL003323	996	0.0147623	0.000784916	4.8247e-66	0.260098	0.0135585	0.000884441	4.63439e-46	PARC	CCL18	P55774
SL007547	995	0.010579	0.000571908	3.46321e-64	0.252544	0.00930055	0.000641255	9.05322e-42	TIMD3	HAVCR2	Q8TDQ0
SL002508	994	0.00898644	0.000493085	1.44638e-62	0.250218	0.00797372	0.000553606	2.87072e-41	IL-18 BPa	IL18BP	O95998
SL000247	997	-0.0339628	0.00186511	1.62951e-62	0.199057	-0.0319078	0.00210725	4.54817e-45	6-Phosphogluconate dehydrogenase	PGD	P52209
SL012517	991	0.0135868	0.000752531	1.46106e-61	0.246082	0.0121515	0.000845149	3.87524e-41	RSPO4	RSPO4	Q2I0M5
SL005084	995	0.0086183	0.000481328	1.004e-60	0.243647	0.00796702	0.000542908	1.2922e-42	Periostin	POSTN	Q15063
SL004579	996	0.00812683	0.00045886	1.32704e-59	0.237595	0.00780775	0.000518798	1.38038e-44	Macrophage mannose receptor	MRC1	P22897
SL004867	995	0.0165253	0.000944818	2.54231e-58	0.231726	0.015296	0.00106615	5.1356e-41	Carbonic anhydrase III	CA3	P07451
SL000658	990	0.00681027	0.000390758	6.16839e-58	0.230017	0.00552924	0.000433819	3.75171e-33	GAS1	GAS1	P54826
SL004626	991	0.0104192	0.000600131	1.44042e-57	0.217108	0.0105541	0.000680172	5.14587e-47	ADAMTS-5	ADAMTS5	Q9UNA0
SL005213	993	0.00878402	0.000506623	1.84693e-57	0.224487	0.00729922	0.000564333	4.84499e-34	RELT	RELT	Q969Z4
SL012561	993	0.0131115	0.000759756	5.281e-57	0.231115	0.0121028	0.000857387	7.69813e-40	REG4	REG4	Q9BYZ8
SL007631	995	0.0126255	0.000736385	2.2167e-56	0.180936	0.0137064	0.000829459	1.79294e-52	SOST	SOST	Q9BQB4
SL002644	992	-0.0047693	0.000279807	8.54532e-56	0.223893	-0.00407341	0.000312941	2.03012e-34	ERBB1	EGFR	P00533
SL006119	989	0.0118103	0.000697938	4.42853e-55	0.220382	0.0096149	0.000773819	1.15189e-31	TFF3	TFF3	Q07654
SL005156	990	0.0139721	0.000833322	3.25486e-54	0.219991	0.010755	0.000916137	1.36938e-28	DAN	NBL1	P41271
SL004646	990	0.00770017	0.000460134	4.84422e-54	0.214549	0.00651268	0.000513682	7.54687e-33	Layilin	LAYN	Q6UX15
SL012395	988	0.0107259	0.000644569	1.66746e-53	0.217464	0.00991938	0.000727964	2.25123e-37	NET1	NTN1	O95631
SL003340	997	0.0309208	0.00187738	1.31625e-52	0.212461	0.0303547	0.00212541	1.06943e-40	YKL-40	CHI3L1	P36222
SL003327	992	0.00810947	0.000493636	2.38084e-52	0.211661	0.00726056	0.000555581	1.16081e-34	Factor D	CFD	P00746
SL004140	991	0.00639618	0.000391921	9.53285e-52	0.211574	0.00503816	0.00043327	4.24092e-28	Ephrin-A4	EFNA4	P52798
SL005172	993	0.00837678	0.000520661	1.77799e-50	0.199084	0.00733418	0.000584804	3.26403e-32	IGFBP-6	IGFBP6	P24592
SL007179	994	0.00641164	0.000399945	3.58539e-50	0.185849	0.00585185	0.00045097	3.08315e-34	EPHB2	EPHB2	P29323
SL008360	993	0.00589123	0.000370447	1.8235e-49	0.199695	0.00516851	0.000416295	1.2109e-31	FLRT2	FLRT2	O43155
SL006544	993	0.00639817	0.000403929	3.99036e-49	0.192046	0.00667877	0.000456513	2.14239e-42	BGH3	TGFBI	Q15582
SL006230	995	0.00624416	0.000395385	6.95314e-49	0.197226	0.00621084	0.000447238	1.08674e-38	Lumican	LUM	P51884
SL004556	993	0.0059089	0.00037699	3.13097e-48	0.197881	0.00587344	0.000426475	4.11265e-38	DAF	CD55	P08174
SL002731	993	0.00668153	0.000426776	3.85787e-48	0.197925	0.00637859	0.000482658	2.25238e-35	Fas, soluble	FAS	P25445
SL001888	995	0.00622825	0.000399057	6.80811e-48	0.195649	0.0055306	0.000449124	3.51214e-31	SLPI	SLPI	P03973
SL009207	993	0.00594165	0.000381244	9.07979e-48	0.194512	0.00533592	0.000429708	1.2054e-31	Dynactin subunit 2	DCTN2	Q13561
SL005357	992	0.0129005	0.00083451	4.3806e-47	0.194337	0.0109764	0.000935068	1.36938e-28	PSP	REG1A	P05451
SL003744	993	0.00544233	0.000358399	1.27985e-45	0.181	0.00478669	0.00040297	3.27067e-29	Galectin-3	LGALS3	P17931
SL002755	992	0.0119074	0.000787592	2.88573e-45	0.185813	0.0106509	0.000887223	9.14808e-30	PAPP-A	PAPPA	Q13219
SL001766	997	0.0272079	0.0018015	3.27967e-45	0.122266	0.0298148	0.00203216	1.2922e-42	HCG	CGA CGB	P01215,P01233
SL004843	991	0.00569092	0.000377558	4.95384e-45	0.184553	0.00465901	0.000421635	1.32918e-25	Ephrin-A2	EFNA2	O43921
SL006114	994	0.00657986	0.000438832	1.2478e-44	0.183125	0.00588351	0.000494486	2.7329e-29	ROR1	ROR1	Q01973
SL005789	995	0.00787744	0.000527224	2.31962e-44	0.181735	0.00718664	0.000594728	3.96928e-30	Stanniocalcin-1	STC1	P52823
SL004686	993	0.00935153	0.000626969	3.19685e-44	0.178773	0.0073523	0.000694889	1.13202e-23	TNFSF15	TNFSF15	O95150
SL018509	993	0.00783542	0.000528276	8.71477e-44	0.171333	0.00709355	0.000597001	3.20373e-29	RSPO3	RSPO3	Q9BXY4
SL018256	996	-0.0127203	0.000858755	1.0582e-43	0.150863	-0.0131897	0.000971939	3.94783e-37	CHKB	CHKB	Q9Y259
SL008382	994	0.0147841	0.00100183	2.08549e-43	0.178354	0.0146258	0.00113365	6.79545e-34	CYTD	CST5	P28325
SL000591	990	0.00697627	0.000476933	1.02635e-42	0.173085	0.00620551	0.000537368	9.56947e-28	TIMP-1	TIMP1	P01033
SL005209	994	0.00589125	0.000404068	1.73102e-42	0.171218	0.00589359	0.000457031	7.12676e-34	Notch-3	NOTCH3	Q9UM47
SL003329	996	0.00983786	0.000675537	2.05212e-42	0.168859	0.00821084	0.000756399	8.34061e-25	HCC-1	CCL14	Q16627
SL011499	996	0.01504	0.00104291	1.11228e-41	0.172007	0.0133974	0.00117561	4.21557e-27	PH	PPY	P01298
SL004458	995	0.0117908	0.000818177	1.24923e-41	0.167408	0.00907382	0.00090658	2.06642e-21	Elafin	PI3	P19957
SL001774	996	0.0104861	0.000731613	3.11151e-41	0.13349	0.00936131	0.000824362	6.25882e-27	FABP	FABP3	P05413
SL007207	990	0.00765449	0.000536021	6.04223e-41	0.168064	0.00768287	0.00060581	7.39636e-33	TSP4	THBS4	P35443
SL004141	992	0.00539943	0.000379059	8.98029e-41	0.166837	0.00419334	0.000420843	3.07163e-21	Ephrin-A5	EFNA5	P52803
SL010450	993	0.00646492	0.000457955	3.97245e-40	0.164796	0.00594973	0.000517143	1.44712e-27	CD48	CD48	P09326
SL014270	993	0.00736795	0.000524349	8.46926e-40	0.165043	0.00613705	0.000587412	3.79939e-23	CLM6	CD300C	Q08708
SL004871	993	0.00550727	0.00039645	5.46933e-39	0.161799	0.00487728	0.000446156	4.12641e-25	DR6	TNFRSF21	O75509
SL000525	996	0.0120998	0.000880851	3.21053e-38	0.156643	0.0102537	0.000988848	7.7334e-23	MMP-7	MMP7	P09237
SL008810	996	0.00519594	0.000385074	5.23175e-37	0.152371	0.00499704	0.000435544	1.95411e-27	NEGR1	NEGR1	Q7Z3B1
SL010378	990	-0.00958715	0.000714234	1.20331e-36	0.152429	-0.00977876	0.000806704	2.7608e-30	RET	RET	P07949
SL008728	992	0.00628405	0.000472404	4.63134e-36	0.151202	0.00550332	0.00053203	9.81967e-23	NRX3B	NRXN3	Q9HDB5
SL007502	994	0.00464821	0.000350358	6.7364e-36	0.143516	0.0041509	0.000395035	2.1881e-23	ST4S6	CHST15	Q7LFX5
SL006610	995	-0.00727056	0.000548707	7.98715e-36	0.145892	-0.00676558	0.000619992	4.89885e-25	ATS13	ADAMTS13	Q76LX8
SL001720	993	0.00702718	0.000530554	8.49559e-36	0.149849	0.00641833	0.000598711	3.01643e-24	VCAM-1	VCAM1	P19320
SL003188	988	0.0117443	0.000887568	1.00419e-35	0.149955	0.0102129	0.00100008	3.23915e-22	MIG	CXCL9	Q07325
SL006970	991	0.00658898	0.00049873	1.22713e-35	0.148776	0.00580403	0.000561772	1.09422e-22	DLL1	DLL1	O00548
SL000403	992	0.00627754	0.000478865	3.81588e-35	0.147548	0.00567949	0.000539862	1.99708e-23	Endostatin	COL18A1	P39060
SL000695	995	0.00573621	0.000439585	7.26496e-35	0.145019	0.00464104	0.000491805	3.05919e-19	Lipocalin 2	LCN2	P80188
SL006029	996	0.0158161	0.00121235	7.41549e-35	0.14284	0.0140688	0.00136935	1.79729e-22	Chitotriosidase-1	CHIT1	Q13231
SL002528	995	0.0114391	0.000882955	2.02251e-34	0.133356	0.0113003	0.000999926	1.07647e-26	NPS-PLA2	PLA2G2A	P14555
SL003183	994	0.0114379	0.000885855	3.2785e-34	0.139419	0.0109851	0.00100164	2.94481e-25	IP-10	CXCL10	P02778
SL005430	990	0.00610784	0.000477886	1.41095e-33	0.138795	0.00503342	0.000535724	4.34746e-19	SECTM1	SECTM1	Q8WVN6
SL004863	986	0.0081362	0.000636822	1.504e-33	0.141217	0.00662644	0.000712748	9.78696e-19	TAJ	TNFRSF19	Q9NS68
SL002602	994	0.00937792	0.000744499	1.02602e-32	0.133785	0.00885506	0.000842197	2.07911e-23	Trefoil factor 2	TFF2	Q03403
SL014092	994	-0.00526708	0.000418686	1.21264e-32	0.137094	-0.00514006	0.000473307	8.1137e-25	CDON	CDON	Q4KMG0
SL001938	993	0.00696424	0.000554491	1.50581e-32	0.135301	0.00657948	0.000626744	2.38241e-23	Activin A	INHBA	P08476
SL005764	996	0.00825776	0.00065763	1.51356e-32	0.133129	0.00805358	0.000744053	1.11769e-24	sCD163	CD163	Q86VB7
SL002688	993	0.0100106	0.000803028	4.08042e-32	0.134363	0.00782958	0.000896983	1.026e-16	Osteopontin	SPP1	P10451
SL000002	995	0.00522707	0.00041944	4.18012e-32	0.129016	0.00447065	0.000471863	2.23723e-19	VEGF	VEGFA	P15692
SL010465	993	0.00441761	0.00035496	5.00845e-32	0.126086	0.00412671	0.000400908	1.53052e-22	MATN2	MATN2	O00339
SL008486	989	0.00720047	0.000579669	6.5394e-32	0.133456	0.00642676	0.000653437	9.78498e-21	LEG9	LGALS9	O00182
SL003970	993	0.00961311	0.000774645	7.22395e-32	0.130946	0.00807422	0.000870741	1.18183e-18	PTH	PTH	P01270
SL010501	996	0.00935014	0.000755135	9.49659e-32	0.130518	0.00891255	0.000854002	4.15317e-23	MP2K2	MAP2K2	P36507
SL008380	996	0.00645761	0.000522023	1.06745e-31	0.13285	0.0052479	0.000584974	1.45022e-17	CATZ	CTSZ	Q9UBR2
SL009349	992	0.00375151	0.000303567	1.23078e-31	0.131603	0.00328567	0.000341721	6.87078e-20	FSTL1	FSTL1	Q12841
SL003190	993	0.00757013	0.000614016	1.66202e-31	0.132197	0.00616179	0.000688382	1.69718e-17	MIP-5	CCL15	Q16663
SL000427	994	0.00806568	0.000665749	1.60857e-30	0.126114	0.00719194	0.000751334	9.91255e-20	Fractalkine/CX3CL-1	CX3CL1	P78423
SL004689	995	-0.0073287	0.000606204	2.08385e-30	0.113733	-0.00738937	0.000685815	1.79114e-24	WISP-1	WISP1	O95388
SL004355	994	0.00684161	0.000566883	2.58303e-30	0.12646	0.00593976	0.000638273	9.08112e-19	LD78-beta	CCL3L1	P16619
SL000323	991	0.00598607	0.00049659	3.02447e-30	0.126207	0.0051931	0.000558188	9.2502e-19	C7	C7	P10643
SL004858	993	0.0079811	0.000670951	1.58712e-29	0.123804	0.00719876	0.000758804	2.03025e-19	GFRa-1	GFRA1	P56159
SL000250	990	-0.00395379	0.000333735	2.63553e-29	0.120132	-0.00355758	0.000376772	2.96821e-19	a2-Antiplasmin	SERPINF2	P08697
SL011068	990	0.005943	0.000501881	2.77149e-29	0.123278	0.00498587	0.000564225	4.35912e-17	IL-17 RC	IL17RC	Q8NAC3
SL000052	992	0.00785427	0.000664244	3.25538e-29	0.115956	0.00579497	0.000737848	8.16986e-14	Troponin T	TNNT2	P45379
SL000024	988	0.0064668	0.000552173	1.06005e-28	0.11769	0.00580588	0.000623204	8.47393e-19	TF	F3	P13726
SL005403	990	-0.0060125	0.00051361	1.09998e-28	0.115931	-0.00615285	0.000581178	1.08725e-23	Lectin, mannose-binding 2	LMAN2	Q12907
SL007328	993	0.00420862	0.000360293	1.39889e-28	0.119012	0.00384062	0.000407345	3.27332e-19	JAG1	JAG1	P78504
SL004352	991	0.0069746	0.0005975	1.52096e-28	0.116449	0.00540555	0.000667419	1.32064e-14	IL-17F	IL17F	Q96PD4
SL000325	995	0.00540458	0.000463117	1.53035e-28	0.117933	0.00500679	0.000523413	1.0292e-19	C9	C9	P02748
SL001996	990	0.00622387	0.000534413	1.98068e-28	0.117356	0.00486955	0.000597991	9.59098e-15	Angiopoietin-2	ANGPT2	O15123
SL007100	995	0.0098783	0.000850365	2.60058e-28	0.117745	0.00900569	0.000960711	5.15409e-19	LKHA4	LTA4H	P09960
SL000406	994	0.00801714	0.000690145	2.60058e-28	0.11901	0.00728554	0.000779114	6.24832e-19	Eotaxin	CCL11	P51671
SL007206	992	0.00862574	0.000743843	3.20783e-28	0.116239	0.00655448	0.000830104	6.09779e-14	TSP2	THBS2	P35442
SL005191	991	0.00541989	0.000467431	3.2316e-28	0.11788	0.00521178	0.000528544	7.82081e-21	ILT-4	LILRB2	Q8N423
SL005193	994	0.00583257	0.00050386	3.86291e-28	0.106938	0.00507613	0.000567382	1.74703e-17	JAM-B	JAM2	P57087
SL003672	972	0.00543809	0.000473331	1.01582e-27	0.10804	0.00536199	0.000535779	2.17915e-21	SOD3	SOD3	P08294
SL003060	992	0.00405471	0.000354692	1.67202e-27	0.112373	0.00369241	0.000400313	1.79053e-18	bFGF-R	FGFR1	P11362
SL000343	991	0.00628905	0.000556351	6.06063e-27	0.111664	0.00543088	0.000627098	1.77494e-16	Cathepsin B	CTSB	P07858
SL000382	995	-0.0136534	0.00121437	1.09394e-26	0.105545	-0.0105305	0.00135828	1.70199e-13	CK-MB	CKB CKM	P12277 P06732
SL000459	994	0.00939355	0.000836536	1.25588e-26	0.112291	0.0081123	0.000942392	2.66342e-16	IgA	IGHA1 IGHA2	P01876 P01877
SL003201	995	-0.00398974	0.000355685	1.40116e-26	0.111925	-0.00360729	0.000401823	1.39015e-17	VEGF sR2	KDR	P35968
SL004151	994	0.00666649	0.000596756	2.20926e-26	0.108974	0.0053967	0.000669799	1.8072e-14	IL-15 Ra	IL15RA	Q13261
SL003301	994	0.00570659	0.000512246	2.98504e-26	0.110579	0.004795	0.000576373	2.49185e-15	Ck-b-8-1	CCL23	P55773
SL004143	993	0.00504942	0.000453561	3.20409e-26	0.110066	0.00466738	0.000512483	4.75613e-18	GFRa-2	GFRA2	O00451
SL019019	990	0.00617153	0.000555088	3.72055e-26	0.109364	0.0046596	0.000619793	9.07706e-13	PIANP	PIANP	Q8IYJ0
SL003302	993	0.00632364	0.000570748	5.36459e-26	0.10968	0.00542621	0.000643241	1.0175e-15	MPIF-1	CCL23	P55773
SL004016	992	0.00411744	0.000374164	1.12542e-25	0.103626	0.00352132	0.000421466	1.89714e-15	CXCL16, soluble	CXCL16	Q9H2A7
SL003300	989	0.00754875	0.000688365	1.64471e-25	0.106613	0.00656133	0.000776184	9.007e-16	HCC-4	CCL16	O15467
SL007274	992	0.00487911	0.000445018	1.65506e-25	0.107383	0.00369984	0.000496957	1.49135e-12	EFNB2	EFNB2	P52799
SL008158	995	0.00936553	0.000859236	3.0545e-25	0.0907903	0.0081831	0.000969637	9.92925e-16	H31	HIST1H3A	P68431
SL014113	993	0.00656735	0.000607383	7.16965e-25	0.0974585	0.00584584	0.000686429	5.52379e-16	NLGNX	NLGN4X	Q8N0W4
SL010458	991	0.0062079	0.000576269	1.0569e-24	0.102509	0.00567815	0.000651183	1.10005e-16	Endocan	ESM1	Q9NQ30
SL001998	992	0.00551358	0.000514144	1.67958e-24	0.102816	0.00555326	0.00058245	1.3531e-19	TFPI	TFPI	P10646
SL014091	984	-0.0125448	0.00117479	2.65151e-24	0.102004	-0.0120698	0.00133037	6.43603e-18	SORC2	SORCS2	Q96PQ0
SL004010	992	-0.00660125	0.000623684	6.35754e-24	0.100308	-0.00617457	0.000705404	8.46666e-17	SCF sR	KIT	P10721
SL000451	993	0.00576243	0.000544991	6.98707e-24	0.0967626	0.00589785	0.000616334	1.01029e-19	HSP 70	HSPA1A	P0DMV8
SL003522	994	0.00693357	0.000656928	8.29366e-24	0.0937847	0.00495696	0.000731076	1.33244e-10	ERP29	ERP29	P30040
SL004357	995	-0.00591847	0.00056097	8.54374e-24	0.0961019	-0.00470053	0.000629376	1.27011e-12	Myostatin	MSTN	O14793
SL000506	996	0.0139698	0.00132424	8.55826e-24	0.0708705	0.0153912	0.00149541	1.53052e-22	Luteinizing hormone	CGA LHB	P01215, P01229
SL008414	994	0.00424091	0.000404267	1.49964e-23	0.0984418	0.00359593	0.00045568	6.26455e-14	EphB6	EPHB6	O15197
SL005059	995	0.00374496	0.000357517	1.72141e-23	0.0981517	0.00362213	0.000404517	1.66165e-17	TGF-b R III	TGFBR3	Q03167
SL010381	992	-0.00594825	0.00057238	3.78023e-23	0.0869082	-0.00592111	0.000648747	4.06477e-18	Soggy-1	DKKL1	Q9UK85
SL010468	995	0.00396194	0.000381326	3.80547e-23	0.09657	0.00350822	0.00043048	9.19781e-15	RGMB	RGMB	Q6NW40
SL004258	995	0.00798625	0.000773592	7.06642e-23	0.0829577	0.00856837	0.000874158	1.29427e-20	Adiponectin	ADIPOQ	Q15848
SL004837	989	0.00653836	0.0006503	8.72962e-22	0.0910433	0.00578799	0.000734614	6.82587e-14	Activin AB	INHBA INHBB	P08476 P09529
SL008609	995	0.00604788	0.000603552	1.16826e-21	0.0895493	0.00600245	0.000682614	6.14888e-17	FCG3B	FCGR3B	O75015
SL008516	994	0.00902933	0.000906942	2.10452e-21	0.089244	0.0093047	0.00102622	6.58609e-18	CYTT	CST2	P09228
SL000051	996	0.0132176	0.00132826	2.17322e-21	0.0893447	0.0115338	0.00149905	2.59649e-13	CRP	CRP	P02741
SL002823	993	-0.00424041	0.000429076	4.03255e-21	0.08514	-0.00367168	0.000483757	5.49316e-13	sL-Selectin	SELL	P14151
SL004137	991	0.00620546	0.000627886	4.03255e-21	0.0881965	0.00484638	0.000704244	6.9022e-11	EphA1	EPHA1	P21709
SL000510	993	0.00308324	0.0003124	4.51355e-21	0.0889056	0.00263592	0.00035206	1.11912e-12	Lysozyme	LYZ	P61626
SL005183	988	-0.00632561	0.000641166	4.69149e-21	0.0862398	-0.00634693	0.000724424	8.02394e-17	IL-22BP	IL22RA2	Q969J5
SL010470	992	0.00840358	0.000854247	5.9773e-21	0.0867752	0.00809693	0.000966123	1.56583e-15	Semaphorin 3E	SEMA3E	O15041
SL005195	995	0.00823303	0.000838095	6.69397e-21	0.0867771	0.00801997	0.000948375	8.77467e-16	LAG-3	LAG3	P18627
SL004865	987	-0.00515288	0.000524637	6.87474e-21	0.0829218	-0.00483012	0.000594157	1.06392e-14	Cadherin-6	CDH6	P55285
SL010456	996	0.0087634	0.000892951	7.19354e-21	0.086268	0.00846361	0.00101128	1.69826e-15	CYTN	CST1	P01037
SL014008	996	0.00754286	0.00077244	1.11234e-20	0.085891	0.00709552	0.000873573	1.10513e-14	FUT5	FUT5	Q11128
SL004650	990	0.00513641	0.000526065	1.13138e-20	0.0872612	0.00487608	0.000597034	8.11887e-15	sFRP-3	FRZB	Q92765
SL012538	990	0.00491531	0.000504093	1.26456e-20	0.083437	0.00435992	0.000568486	3.1137e-13	ARMEL	CDNF	Q49AH0
SL000251	991	-0.00314132	0.000324487	2.34694e-20	0.0852791	-0.00302805	0.000367174	4.38563e-15	a2-HS-Glycoprotein	AHSG	P02765
SL018548	989	0.00478262	0.000494939	2.7473e-20	0.0851294	0.00355314	0.000553584	1.31172e-09	alpha-1-antichymotrypsin complex	SERPINA3	P01011
SL004672	995	0.00492059	0.000516431	8.93905e-20	0.0828369	0.00437072	0.000583166	1.06283e-12	BCMA	TNFRSF17	Q02223
SL010288	995	-0.0102411	0.00107631	9.96929e-20	0.0774808	-0.00931141	0.0012173	3.57446e-13	Carbonic anhydrase 6	CA6	P23280
SL004660	996	0.0119318	0.00126117	1.5933e-19	0.0780198	0.00982368	0.00141995	5.46289e-11	BSP	IBSP	P21815
SL000592	994	0.00350377	0.000372099	2.34996e-19	0.0795033	0.00338467	0.000420818	2.00135e-14	TIMP-2	TIMP2	P16035
SL009948	994	0.00392673	0.000417776	2.71321e-19	0.0806044	0.00372631	0.000472398	6.38125e-14	PLXB2	PLXNB2	O15031
SL012769	996	0.0126917	0.00135369	3.2997e-19	0.0805774	0.0111691	0.00152835	3.88057e-12	FAM3D	FAM3D	Q96BQ1
SL005218	992	0.00406494	0.000439904	1.06392e-18	0.0785534	0.00404994	0.000497345	9.59098e-15	Siglec-7	SIGLEC7	Q9Y286
SL000565	995	0.0101081	0.00110513	2.35462e-18	0.0743114	0.00634876	0.00122414	1.24409e-06	Renin	REN	P00797
SL003872	993	0.00280507	0.000307734	3.06732e-18	0.0759967	0.00262169	0.00034826	8.4996e-13	gp130, soluble	IL6ST	P40189
SL000678	996	0.00679893	0.000750399	4.83502e-18	0.0754305	0.00729449	0.000848492	2.88848e-16	Granulysin	GNLY	P22749
SL010516	997	-0.0195787	0.00217834	8.8517e-18	0.0497432	-0.0170626	0.00246062	4.92899e-11	SRCN1	SRC	P12931
SL000383	995	-0.00871071	0.000976596	1.56793e-17	0.0698134	-0.00630151	0.00109299	5.9471e-08	CK-MM	CKM	P06732
SL005699	993	-0.00553152	0.000621411	1.81653e-17	0.0721258	-0.00524498	0.00070263	1.29981e-12	Apo L1	APOL1	O14791
SL011069	989	-0.00446737	0.000509971	5.8698e-17	0.0645274	-0.00490635	0.000576232	5.59145e-16	Marapsin	PRSS27	Q9BQR3
SL005087	994	0.00336445	0.000384359	6.12358e-17	0.0708073	0.00327621	0.00043517	8.4996e-13	IGFBP-7	IGFBP7	Q16270
SL003643	997	0.00853359	0.000984818	1.25018e-16	0.0563265	0.00816391	0.00111483	3.50351e-12	Glutathione S-transferase Pi	GSTP1	P09211
SL014292	974	0.0067201	0.000782156	2.32804e-16	0.0696615	0.00515788	0.000877437	3.18066e-08	SIG14	SIGLEC14	Q08ET2
SL000360	991	-0.00356513	0.000416051	2.72256e-16	0.068072	-0.0029918	0.000468624	1.61011e-09	Coagulation Factor X	F10	P00742
SL000613	993	0.00435249	0.000508744	3.01508e-16	0.0667518	0.00448029	0.000575932	1.41812e-13	uPA	PLAU	P00749
SL014248	993	0.00416432	0.000488572	3.87927e-16	0.0676167	0.00298251	0.000546817	3.18265e-07	SEM6B	SEMA6B	Q9H3T3
SL000320	992	0.00605779	0.000720148	9.43605e-16	0.0633871	0.00563048	0.000814843	5.76677e-11	C5a	C5	P01031
SL008614	993	0.00501447	0.000597836	1.13627e-15	0.0543688	0.00399098	0.000673081	2.36456e-08	EFNB1	EFNB1	P98172
SL003770	988	0.00563884	0.000674338	1.39367e-15	0.061987	0.0049409	0.000762003	8.86843e-10	SARP-2	SFRP1	Q8N474
SL005152	987	0.00562066	0.000672732	1.46804e-15	0.0634637	0.00458751	0.000757427	1.15304e-08	TIG2	RARRES2	Q99969
SL003324	994	-0.00375751	0.00045042	1.60203e-15	0.0643866	-0.00308766	0.000507348	9.74145e-09	Coagulation Factor Xa	F10	P00742
SL004712	994	0.00461249	0.000553809	1.77436e-15	0.0631726	0.00448501	0.000626613	1.10094e-11	SDF-1	CXCL12	P48061
SL018946	990	0.00430577	0.000517244	1.83384e-15	0.0595156	0.00287286	0.000577768	3.54801e-06	UB2G2	UBE2G2	P60604
SL008574	996	0.00610199	0.00073491	2.1448e-15	0.0588005	0.00556257	0.000831327	2.38088e-10	OMD	OMD	Q99983
SL000521	995	0.0124918	0.0015064	2.32168e-15	0.0592474	0.0103072	0.00169897	1.08768e-08	MMP-1	MMP1	P03956
SL005184	996	0.00698023	0.000841847	2.32441e-15	0.0608052	0.00513876	0.000944382	3.38588e-07	IL-23	IL12B IL23A	P29460, Q9NPF7
SL004645	985	-0.00464227	0.000559882	2.33473e-15	0.0641562	-0.00487908	0.000633647	2.52437e-13	HAI-1	SPINT1	O43278
SL005168	997	-0.00572459	0.000690575	2.33473e-15	0.0607202	-0.00520114	0.00078113	2.93142e-10	Growth hormone receptor	GHR	P10912
SL004118	993	0.00414687	0.000500542	2.42418e-15	0.0634055	0.00439729	0.00056608	1.53285e-13	TrATPase	ACP5	P13686
SL000053	991	0.0084275	0.00101734	2.43592e-15	0.0622943	0.00856918	0.00115275	1.61007e-12	tPA	PLAT	P00750
SL003166	995	0.00257651	0.000313183	3.77079e-15	0.0551109	0.00250211	0.000354338	2.12366e-11	ALCAM	ALCAM	Q13740
SL003994	992	-0.00531382	0.000646706	4.07399e-15	0.0624172	-0.00428581	0.000728503	3.09049e-08	BMP-1	BMP1	P13497
SL001997	990	0.00353162	0.000430778	4.67322e-15	0.0628977	0.00288786	0.000485158	2.07613e-08	IL-1 sRI	IL1R1	P14778
SL004260	990	0.0056988	0.000695128	4.67322e-15	0.0629454	0.00466565	0.000783025	2.01159e-08	resistin	RETN	Q9HD89
SL011049	993	-0.00304274	0.000376722	1.18544e-14	0.0580245	-0.00292826	0.000426372	7.52505e-11	MASP3	MASP1	P48740
SL006694	997	-0.0101175	0.00125715	1.46637e-14	0.0534509	-0.00892881	0.00142118	2.96839e-09	CNDP1	CNDP1	Q96KN2
SL000519	989	0.00691464	0.000861347	1.71919e-14	0.0590551	0.00585557	0.000971223	1.35321e-08	MIP-1a	CCL3	P10147
SL003326	996	0.0101195	0.00126482	2.08813e-14	0.0501174	0.00943398	0.00143219	4.59043e-10	I-TAC	CXCL11	O14625
SL002684	989	0.00415142	0.000520836	2.63066e-14	0.055309	0.00319486	0.000586365	3.274e-07	CSF-1	CSF1	P09603
SL005491	993	-0.0040991	0.00051677	3.49404e-14	0.0534113	-0.00408548	0.000585662	3.74984e-11	OBCAM	OPCML	Q14982
SL008591	996	0.0101756	0.00128456	3.76004e-14	0.0570363	0.0124735	0.00144521	2.22419e-16	TFF1	TFF1	P04155
SL010388	993	0.00745293	0.000950614	6.9264e-14	0.0574714	0.00532421	0.00106471	3.08564e-06	Trypsin 2	PRSS2	P07478
SL005233	989	0.00529572	0.000676782	7.75841e-14	0.053672	0.00407923	0.000761721	5.30126e-07	XEDAR	EDA2R	Q9HAV5
SL008381	989	0.00388356	0.000496598	7.98983e-14	0.0563714	0.00422583	0.000561352	8.4996e-13	CATF	CTSF	Q9UBX1
SL004347	993	0.00731138	0.000942545	1.26992e-13	0.0537182	0.00570132	0.00105989	4.71124e-07	IL-22	IL22	Q9GZX6
SL002519	988	-0.00273289	0.000352481	1.30605e-13	0.0535714	-0.00226695	0.000397744	8.57038e-08	ERBB3	ERBB3	P21860
SL005221	996	0.00543901	0.000703193	1.48161e-13	0.0475897	0.0047652	0.000794422	1.59979e-08	SREC-I	SCARF1	Q14162
SL010612	997	0.007612	0.000991009	2.19123e-13	0.0500603	0.00769016	0.0011221	8.23225e-11	Dkk-4	DKK4	Q9UBT3
SL005201	992	0.00200332	0.000261044	2.30299e-13	0.0547795	0.00177402	0.000294701	1.42281e-08	MIS	AMH	P03971
SL011809	989	0.00453988	0.000593209	2.68602e-13	0.0537643	0.00472825	0.000671579	2.43328e-11	XTP3A	DCTPP1	Q9H773
SL005207	983	0.0042036	0.000554385	4.50474e-13	0.0540993	0.003198	0.000624489	1.70665e-06	NKp46	NCR1	O76036
SL012774	994	0.00406086	0.000538609	6.07191e-13	0.0532135	0.00347579	0.000608936	8.18892e-08	CREL1	CRELD1	Q96HD1
SL000507	988	-0.00361928	0.000483284	8.75761e-13	0.0467758	-0.00354046	0.000546745	9.3205e-10	Lymphotoxin a1/b2	LTA LTB	P01374, Q06643
SL007306	994	0.00401562	0.000536588	9.01747e-13	0.0525484	0.00340762	0.000605832	1.26846e-07	FAM3B	FAM3B	P58499
SL004209	994	0.00550902	0.000738526	1.06813e-12	0.0452646	0.00519759	0.000835345	4.29687e-09	annexin II	ANXA2	P07355
SL005231	993	0.00387248	0.000519812	1.14128e-12	0.0507371	0.00326307	0.000586591	1.77884e-07	UNC5H4	UNC5D	Q6UXZ4
SL004298	992	0.00375853	0.000505506	1.26257e-12	0.0494517	0.00365162	0.000571782	1.59513e-09	granzyme A	GZMA	P12544
SL004149	993	0.00369207	0.000499591	1.72909e-12	0.049988	0.00360102	0.000565163	1.73248e-09	IL-13 Ra1	IL13RA1	P78552
SL005797	992	-0.0053562	0.000724792	1.72909e-12	0.0514457	-0.00577416	0.000819501	2.35205e-11	PIGR	PIGR	P01833
SL000039	987	0.00554431	0.00075212	1.9701e-12	0.048868	0.00463477	0.000849276	3.14743e-07	IL-8	CXCL8	P10145
SL000516	992	0.00630043	0.000855332	2.03259e-12	0.0493119	0.00580827	0.000968542	1.60814e-08	MCP-3	CCL7	P80098
SL014983	995	0.00613844	0.000836035	2.3904e-12	0.048602	0.00494903	0.000942598	9.01591e-07	H2B2E	HIST2H2BE	Q16778
SL016128	994	0.00415025	0.000568497	3.20392e-12	0.0492827	0.00442848	0.000642628	6.49749e-11	TXD12	TXNDC12	O95881
SL008623	993	0.00486886	0.000667154	3.24851e-12	0.0487936	0.00485807	0.000754283	1.14887e-09	CNTN2	CNTN2	Q02246
SL008835	991	0.00488357	0.000669913	3.4296e-12	0.0499718	0.00261994	0.000743124	0.00142774	ASGR1	ASGR1	P07306
SL007429	994	0.00338724	0.000465476	3.73282e-12	0.04959	0.00203581	0.000518836	0.000335844	GPNMB	GPNMB	Q14956
SL003167	987	0.0061427	0.000845028	3.94371e-12	0.0492342	0.00423956	0.000946454	3.48765e-05	BLC	CXCL13	O43927
SL002762	997	0.0198273	0.00274468	5.35803e-12	0.046742	0.0160184	0.00309704	1.32897e-06	CgA	CHGA	P10645
SL004805	990	0.0029394	0.000406988	5.42154e-12	0.0480663	0.00261433	0.000459887	9.27645e-08	Nectin-like protein 2	CADM1	Q9BY67
SL000558	997	-0.00271126	0.000375573	5.50051e-12	0.0485244	-0.00224602	0.000424089	7.11967e-07	Prothrombin	F2	P00734
SL007173	993	0.0028577	0.00039631	5.81719e-12	0.0473057	0.00236906	0.000447213	7.11063e-07	GRN	GRN	P28799
SL000017	997	0.00869462	0.00121084	7.12742e-12	0.0482455	0.00882129	0.001371	1.18899e-09	vWF	VWF	P04275
SL000344	987	0.00572294	0.000797058	7.17456e-12	0.0483506	0.00526157	0.000903165	4.26469e-08	Cathepsin D	CTSD	P07339
SL004146	994	0.00586372	0.000817624	7.54188e-12	0.0446487	0.00498985	0.000923352	4.13349e-07	IL-1 R4	IL1RL1	Q01638
SL000308	995	0.00357273	0.000510167	2.3923e-11	0.045613	0.00381901	0.00057672	3.70174e-10	C1-Esterase Inhibitor	SERPING1	P05155
SL004400	992	0.00277467	0.000397484	2.78096e-11	0.0459085	0.00270173	0.000449811	1.53375e-08	Coagulation Factor IXab	F9	P00740
SL000164	995	0.0040476	0.000583704	3.7805e-11	0.0409771	0.0040904	0.00066052	5.11862e-09	Myoglobin	MB	P02144
SL001815	993	-0.00263328	0.000379814	3.80221e-11	0.0451156	-0.00171326	0.000425107	0.000223729	Mn SOD	SOD2	P04179
SL003304	991	0.00224436	0.000327056	6.09752e-11	0.0443498	0.0021365	0.000369885	5.64595e-08	IGF-I sR	IGF1R	P08069
SL001902	991	0.00309879	0.000451836	6.24212e-11	0.0444792	0.00325584	0.000511731	1.8286e-09	BCAM	BCAM	P50895
SL000545	994	-0.00298027	0.000436936	7.96398e-11	0.0419518	-0.00213795	0.000491159	5.97517e-05	Prekallikrein	KLKB1	P03952
SL016969	996	0.00654322	0.000962838	9.35956e-11	0.0371615	0.00606526	0.00108953	1.74464e-07	CSRP3	CSRP3	P50461
SL005196	994	0.0025859	0.000380716	9.55595e-11	0.0390707	0.00225176	0.000430305	9.81495e-07	LSAMP	LSAMP	Q13449
SL007696	994	0.0028273	0.000417065	1.03862e-10	0.0434772	0.00251603	0.00047134	5.78674e-07	C1QR1	CD93	Q9NPY3
SL001947	994	0.00342465	0.000506312	1.14335e-10	0.043282	0.00268843	0.000570861	1.23098e-05	MIA	MIA	Q16674
SL003179	995	0.00532375	0.000789414	1.2987e-10	0.0359813	0.00523781	0.000893406	3.44588e-08	Integrin a1b1	ITGA1 ITGB1	P56199, P05556
SL010369	989	0.00327447	0.000487739	1.5842e-10	0.0422461	0.0031235	0.000551714	1.0498e-07	Carbonic Anhydrase IV	CA4	P22748
SL005171	992	0.00308541	0.000459863	1.61936e-10	0.0420778	0.00252989	0.000518843	5.59902e-06	IGFBP-4	IGFBP4	P22692
SL000357	993	0.002615	0.000391726	2.01181e-10	0.0421522	0.00255225	0.000443157	6.13835e-08	Coagulation Factor IX	F9	P00740
SL004152	994	0.00358033	0.000536929	2.1024e-10	0.0417565	0.00307706	0.000606438	2.14608e-06	IL-18 Ra	IL18R1	Q13478
SL005188	994	0.00547069	0.000820657	2.12116e-10	0.0419554	0.00498602	0.000927872	4.83534e-07	IL-5 Ra	IL5RA	Q01344
SL001797	989	0.00274318	0.000414166	2.79866e-10	0.0406954	0.00244272	0.000468279	1.06792e-06	Kallikrein 6	KLK6	Q92876
SL001990	992	0.00454216	0.000686361	2.8878e-10	0.0390651	0.00342367	0.00077329	4.37807e-05	IL-1Ra	IL1RN	P18510
SL003733	989	0.00382657	0.000580392	3.37949e-10	0.0361915	0.00347098	0.00065541	7.11967e-07	SMAC	DIABLO	Q9NR28
SL004362	993	0.00447139	0.000679636	3.67745e-10	0.0406383	0.00366131	0.000767155	9.13866e-06	SCGF-beta	CLEC11A	Q9Y240
SL000474	988	0.00265348	0.00040349	3.7391e-10	0.0381713	0.00230917	0.000455574	2.19955e-06	IL-16	IL16	Q14005
SL001728	989	0.00403447	0.000613789	3.80249e-10	0.0403453	0.00275608	0.00068844	0.000246747	PDGFRA	PDGFRA	P16234
SL005102	995	0.0058117	0.000887423	4.41057e-10	0.0379236	0.00662665	0.00100318	4.09387e-10	SHBG	SHBG	P04278
SL004153	993	0.00366936	0.000563131	5.43254e-10	0.0386993	0.00339936	0.000637012	5.81674e-07	M-CSF R	CSF1R	P07333
SL005153	994	0.00240247	0.000369157	5.6942e-10	0.0397862	0.00213869	0.000417351	1.67909e-06	CNTFR alpha	CNTFR	P26992
SL003764	996	0.00254122	0.000393709	7.96082e-10	0.0392402	0.00280208	0.000445172	2.77458e-09	NCAM-120	NCAM1	P13591
SL000272	992	-0.00178077	0.000276343	8.49306e-10	0.0389956	-0.00144023	0.000311836	1.87243e-05	Antithrombin III	SERPINC1	P01008
SL004363	993	0.00479377	0.00074732	1.01876e-09	0.0385197	0.00389007	0.000843491	1.92568e-05	SCGF-alpha	CLEC11A	Q9Y240
SL005158	991	0.00181608	0.000285795	1.48151e-09	0.0359911	0.00167168	0.000323453	1.34819e-06	DC-SIGNR	CLEC4M	Q9H2X3
SL002706	991	0.00489831	0.000772453	1.60367e-09	0.0373474	0.00382765	0.000872025	5.10387e-05	CD23	FCER2	P06734
SL004208	993	0.00361742	0.00057414	2.05601e-09	0.0357615	0.00293455	0.000647971	2.81096e-05	annexin I	ANXA1	P04083
SL011533	997	-0.0112716	0.00179256	2.21174e-09	0.0269406	-0.0100761	0.00202809	3.60542e-06	SGTA	SGTA	O43765
SL012783	990	-0.00409772	0.000652218	2.28285e-09	0.0361585	-0.0033001	0.000736162	3.44311e-05	WFKN1	WFIKKN1	Q96NZ8
SL000319	990	0.00223186	0.000357306	2.84039e-09	0.0365908	0.00227472	0.000404259	1.26453e-07	C5	C5	P01031
SL000064	995	-0.00369455	0.000591517	2.84039e-09	0.0369049	-0.00386312	0.000669802	5.8984e-08	Kallikrein 7	KLK7	P49862
SL004180	991	0.00335653	0.000546218	5.25049e-09	0.0346869	0.00259054	0.00061569	0.000107791	CD30	TNFRSF8	P28908
SL007674	991	0.00370346	0.000604654	5.91062e-09	0.0347758	0.00276233	0.000682348	0.000208004	LY9	LY9	Q9HBG7
SL012822	994	0.00320543	0.000524983	6.60489e-09	0.0346307	0.00207677	0.000589092	0.00142774	BSSP4	PRSS22	Q9GZN4
SL014009	992	0.00413432	0.000678468	7.0886e-09	0.0309286	0.00358238	0.000767342	1.48706e-05	HDGR2	HDGFRP2	Q7Z4V5
SL012108	989	-0.00320377	0.000525796	7.0904e-09	0.0316627	-0.00337093	0.000593679	9.59804e-08	PLCG1	PLCG1	P19174
SL016566	994	-0.00366787	0.000602166	7.14117e-09	0.0290004	-0.00377135	0.000681342	2.06412e-07	DRAK2	STK17B	O94768
SL008865	991	0.00326048	0.00053658	7.78359e-09	0.0341397	0.00298093	0.000606842	4.7443e-06	PSA2	PSMA2	P25787
SL004671	990	-0.00449236	0.000739778	7.94079e-09	0.0295293	-0.00357292	0.000835019	8.12865e-05	BAFF Receptor	TNFRSF13C	Q96RJ3
SL004720	990	-0.003259	0.000537689	8.47631e-09	0.0313348	-0.00342646	0.000609148	1.26846e-07	Calcineurin B a	PPP3R1	P63098
SL009210	992	0.00535716	0.000885373	8.98401e-09	0.0335497	0.00449589	0.00100023	3.26774e-05	Corticotropin-lipotropin	POMC	P01189
SL007804	988	0.00404078	0.000667922	9.01793e-09	0.0342923	0.00299635	0.000753551	0.000272995	BGN	BGN	P21810
SL004845	992	-0.00333625	0.000556291	1.22719e-08	0.0286368	-0.00345343	0.000630669	2.8523e-07	EphB4	EPHB4	P54760
SL000314	993	-0.00422116	0.000706902	1.42605e-08	0.0269396	-0.00395096	0.000799884	4.15456e-06	C3b	C3	P01024
SL003761	988	0.00543652	0.000911565	1.48734e-08	0.0311943	0.00525862	0.00103074	1.86885e-06	pTEN	PTEN	P60484
SL000462	995	0.00679939	0.00114779	1.87281e-08	0.031004	0.00490713	0.00129263	0.000543462	IGFBP-1	IGFBP1	P08833
SL010514	990	0.00504656	0.000852191	1.89198e-08	0.0334266	0.00619128	0.000960373	1.1122e-09	PTK6	PTK6	Q13882
SL005173	993	0.00210336	0.000356474	2.13608e-08	0.0316839	0.00196991	0.000403221	5.36167e-06	IL-10 Ra	IL10RA	Q13651
SL010464	990	-0.00179367	0.000304529	2.26574e-08	0.0329232	-0.00145729	0.000343994	9.67718e-05	LRIG3	LRIG3	Q6UXM1
SL008639	992	0.00292507	0.000501574	3.16663e-08	0.0320813	0.00293509	0.000567875	1.34819e-06	IDS	IDS	P22304
SL003993	993	0.0025622	0.000445465	5.0034e-08	0.0308814	0.00258178	0.000504355	1.71519e-06	BMP-6	BMP6	P22004
SL010471	992	-0.00263933	0.000459834	5.34277e-08	0.0312339	-0.00200744	0.000518758	0.000411655	Testican-2	SPOCK2	Q92563
SL021043	994	-0.00308452	0.000537619	5.39477e-08	0.0290478	-0.00217124	0.000605091	0.00115009	GDF-11/8	GDF11 MSTN	O95390 O14793
SL004673	991	0.00259197	0.00045503	6.8018e-08	0.0305683	0.00198774	0.00051351	0.000411241	Cathepsin S	CTSS	P25774
SL000640	996	0.00341215	0.000602425	8.126e-08	0.0288659	0.00333032	0.000681689	5.36167e-06	Nidogen	NID1	P14543
SL004594	994	0.00604371	0.00107173	9.32007e-08	0.0274841	0.00450431	0.00120828	0.000692569	Troponin I, skeletal, fast twitch	TNNI2	P48788
SL010617	996	0.00683925	0.00121321	9.38606e-08	0.02989	0.00585294	0.00137125	8.48367e-05	TPSB2	TPSB2	P20231
SL008822	994	0.00327354	0.000583328	1.07995e-07	0.029764	0.00323042	0.000660606	5.27478e-06	EMR2	ADGRE2	Q9UHX3
SL000616	995	-0.00324926	0.00057911	1.08263e-07	0.0296759	-0.00226478	0.00065196	0.00169875	Vitronectin	VTN	P04004
SL004635	992	0.00291477	0.000520225	1.12876e-07	0.028987	0.00248136	0.000587497	0.000101694	CD30 Ligand	TNFSF8	P32971
SL003182	988	0.00313979	0.00056067	1.14428e-07	0.0298743	0.00456774	0.000626194	4.26871e-12	Integrin aVb5	ITGAV ITGB5	P06756, P18084
SL000586	997	-0.010939	0.00196566	1.38342e-07	0.0281473	-0.00889676	0.0022214	0.000245608	Thrombin	F2	P00734
SL000441	988	0.00400488	0.00072071	1.44665e-07	0.0284078	0.00359854	0.000815807	4.7033e-05	HGF	HGF	P14210
SL000458	986	0.00271058	0.000488601	1.5186e-07	0.0284723	0.00173325	0.000548678	0.00486905	IFN-g R1	IFNGR1	P15260
SL000497	995	0.00417791	0.000753744	1.5508e-07	0.0253572	0.00480891	0.000851818	1.14222e-07	Laminin	LAMA1 LAMB1 LAMC1	P25391, P07942, P11047
SL009054	984	0.00275788	0.000499588	1.75618e-07	0.0281793	0.00214822	0.000563338	0.000510767	NRX1B	NRXN1	P58400
SL008909	992	-0.0027494	0.000498703	1.81728e-07	0.0263262	-0.00302365	0.000564136	5.19086e-07	LGMN	LGMN	Q99538
SL008945	997	0.012494	0.00226653	1.81728e-07	0.0283831	0.0136733	0.00256514	5.9785e-07	TGM3	TGM3	Q08188
SL010375	993	-0.00470903	0.000857076	2.00354e-07	0.0278058	-0.00408426	0.000969321	0.000105457	ASAH2	ASAH2	Q9NR71
SL010519	988	0.00323137	0.000588835	2.07325e-07	0.028562	0.003	0.000666099	3.14689e-05	ZAP70	ZAP70	P43403
SL004126	989	0.00314923	0.000574606	2.14798e-07	0.0279405	0.00223162	0.000647888	0.00187859	4-1BB	TNFRSF9	Q07011
SL016928	983	0.00539263	0.000986211	2.29837e-07	0.0286713	0.00469338	0.00111391	0.000105457	SLAF7	SLAMF7	Q9NQ25
SL004733	989	0.00331888	0.000612087	2.93722e-07	0.0268509	0.00240886	0.000689679	0.00158851	sLRP1	LRP1	Q07954
SL004844	988	0.00319275	0.000589417	3.01678e-07	0.0269517	0.0024317	0.000664653	0.000893183	EphA5	EPHA5	P54756
SL014070	992	0.0027131	0.000501601	3.1368e-07	0.0261843	0.00240099	0.000566757	9.67718e-05	SLIK5	SLITRK5	O94991
SL008936	996	0.00210302	0.000390869	3.64557e-07	0.0270433	0.00231599	0.000442075	9.54292e-07	CHL1	CHL1	O00533
SL000408	990	0.00440849	0.000821543	3.93014e-07	0.0273709	0.00326854	0.000924316	0.00137844	Epo	EPO	P01588
SL011448	988	0.00334624	0.00062379	3.95687e-07	0.026489	0.00222043	0.000702144	0.00482398	TNR4	TNFRSF4	P43489
SL012881	987	0.00297864	0.000560488	5.15893e-07	0.0252419	0.00236134	0.000633604	0.000692633	GPC6	GPC6	Q9Y625
SL004269	991	-0.00427865	0.000805388	5.18942e-07	0.0255661	-0.00468958	0.000910773	1.48456e-06	ghrelin	GHRL	Q9UBU3
SL001729	989	0.00305056	0.00057575	5.58112e-07	0.0265897	0.00252477	0.00065049	0.000396043	G-CSF	CSF3	P09919
SL004739	996	0.00769153	0.00145674	6.12932e-07	0.0252016	0.00652151	0.00164655	0.000290184	ITI heavy chain H4	ITIH4	Q14624
SL003703	987	0.00285576	0.000545736	7.85314e-07	0.0236836	0.00234309	0.000617296	0.000543462	BFL1	BCL2A1	Q16548
SL004783	989	0.0040067	0.000770132	9.17381e-07	0.025554	0.00243281	0.00086463	0.0137974	S100A12	S100A12	P80511
SL005215	993	0.00407134	0.00078477	9.86922e-07	0.0254926	0.00390634	0.000888068	4.90816e-05	Siglec-3	CD33	P20138
SL014129	993	0.0016858	0.000325112	9.97749e-07	0.0242091	0.00139785	0.0003673	0.000524858	H6ST1	HS6ST1	O60243
SL005160	996	0.00395593	0.000763587	1.01826e-06	0.0205572	0.00354409	0.00086363	0.000165441	ESAM	ESAM	Q96AP7
SL004726	993	0.00223457	0.000431413	1.02151e-06	0.024937	0.00205747	0.000487954	0.000104568	CD97	CD97	P48960
SL007327	991	0.0043207	0.000836879	1.11209e-06	0.0253358	0.00338014	0.000945017	0.0011922	OLR1	OLR1	P78380
SL003189	991	0.00470556	0.000915065	1.23379e-06	0.0245678	0.0026633	0.00102713	0.0249762	MIP-3b	CCL19	Q99731
SL004908	986	0.00277244	0.000543625	1.53295e-06	0.0242358	0.00244967	0.000613488	0.000256214	Tropomyosin 2	TPM2	P07951
SL012457	994	0.00289383	0.000568233	1.58416e-06	0.0238039	0.00278267	0.000642775	6.60171e-05	NXPH1	NXPH1	P58417
SL010391	995	0.00259748	0.000513952	1.92611e-06	0.0239655	0.00255974	0.000581625	4.87115e-05	WFKN2	WFIKKN2	Q8TEU8
SL012754	992	-0.00355139	0.000703517	1.98022e-06	0.0212218	-0.00383123	0.000796497	7.63866e-06	ASM3A	SMPDL3A	Q92484
SL007056	991	0.00295674	0.000588884	2.26726e-06	0.023507	0.00267506	0.000665917	0.000234974	BMP10	BMP10	O95393
SL008773	991	0.00279256	0.000556863	2.33207e-06	0.0232624	0.00238338	0.000628627	0.000551271	CD109	CD109	Q6YHK3
SL004120	988	0.00358144	0.000714834	2.38194e-06	0.0229232	0.00256891	0.000806688	0.00449365	Discoidin domain receptor 2	DDR2	Q16832
SL009790	990	0.00217232	0.000434891	2.56267e-06	0.0206354	0.002015	0.000492348	0.000173	RUXF	SNRPF	P62306
SL003303	994	0.00557761	0.00111951	2.72539e-06	0.0211443	0.0052561	0.00126927	0.000141906	CCL28	CCL28	Q9NRJ3
SL002093	991	0.00377962	0.000764705	3.31803e-06	0.0215384	0.00327138	0.000864535	0.000566247	Histone H2A.z	H2AFZ	P0C0S5
SL006131	994	0.00345262	0.000700554	3.5498e-06	0.0229056	0.0019391	0.000785744	0.034562	FABPL	FABP1	P07148
SL010488	994	-0.00253988	0.000515531	3.57017e-06	0.0205638	-0.00280944	0.000583122	7.37456e-06	ABL2	ABL2	P42684
SL005200	986	0.00431988	0.000877324	3.61465e-06	0.0231369	0.00364844	0.000990753	0.000816713	MICB	MICB	Q29980
SL000003	995	0.00267214	0.000545635	4.10988e-06	0.0220985	0.00194933	0.000615234	0.0047351	Angiogenin	ANG	P03950
SL003755	985	0.00348092	0.000712046	4.28538e-06	0.0213099	0.00289712	0.000804463	0.00109795	Mcl-1	MCL1	Q07820
SL003176	988	0.002425	0.000498687	4.85395e-06	0.0220823	0.00226328	0.000563511	0.000235071	I-309	CCL1	P22362
SL006777	994	-0.00257875	0.000530733	4.93099e-06	0.0201648	-0.00278014	0.000600406	1.77557e-05	FETUB	FETUB	Q9UGM5
SL007025	997	0.00719337	0.00148324	5.13049e-06	0.0210318	0.00646468	0.00167874	0.000442696	JAK2	JAK2	O60674
SL004820	997	-0.0116006	0.00239209	5.13049e-06	0.0189133	-0.00833733	0.0026995	0.00605917	Phosphoglycerate mutase 1	PGAM1	P18669
SL005208	995	0.00260494	0.00053877	5.49934e-06	0.0219426	0.00168496	0.000606424	0.0153368	Nogo Receptor	RTN4R	Q9BZR6
SL005190	995	0.00272003	0.000563663	5.74121e-06	0.0216158	0.00329533	0.000636987	1.32651e-06	ILT-2	LILRB1	Q8NHL6
SL004145	988	0.00243215	0.000506578	6.46113e-06	0.0209454	0.00197279	0.000572448	0.00187099	HVEM	TNFRSF14	Q92956
SL000437	988	0.00508149	0.00106009	6.68921e-06	0.0217162	0.00420342	0.00119804	0.00150159	Haptoglobin, Mixed Type	HP	P00738
SL005352	984	0.00326987	0.000682276	6.70349e-06	0.0213296	0.00307413	0.000771481	0.000264474	FABPE	FABP5	Q01469
SL002621	992	0.0049846	0.00104245	7.04371e-06	0.0152888	0.00558778	0.00118055	1.10195e-05	Midkine	MDK	P21741
SL003679	994	0.0017951	0.000376218	7.37915e-06	0.0214623	0.00187426	0.0004257	4.84818e-05	IGF-II receptor	IGF2R	P11717
SL003198	994	0.00285632	0.000601879	8.33714e-06	0.0205744	0.00238669	0.00068013	0.00150158	Tenascin	TNC	P24821
SL003916	993	0.00341751	0.000722224	8.8864e-06	0.020914	0.00307284	0.000816966	0.00061439	kallikrein 12	KLK12	Q9UKR0
SL000460	997	-0.0142967	0.00304019	1.01999e-05	0.0208032	-0.0167364	0.00343842	5.81685e-06	IgD	IGHD IGK@ IGL@	P01880
SL005361	989	0.0026262	0.000558525	1.02094e-05	0.0206528	0.0023564	0.000631356	0.000683247	Apo D	APOD	P05090
SL014735	993	0.00574233	0.00123234	1.24555e-05	0.0169478	0.00556606	0.00139399	0.000256214	IMDH1	IMPDH1	P20839
SL003066	993	0.00163956	0.000352283	1.27564e-05	0.0202484	0.00143512	0.00039832	0.0010937	PEDF	SERPINF1	P36955
SL005629	993	0.00385978	0.000830493	1.31232e-05	0.0169332	0.00414149	0.000940063	4.80351e-05	NAGK	NAGK	Q9UJ70
SL000316	992	0.0031654	0.000681318	1.31888e-05	0.0195075	0.00331493	0.000772193	7.70924e-05	C4	C4A C4B	P0C0L4, P0C0L5
SL005223	991	0.00249973	0.000538412	1.33572e-05	0.0201848	0.00229126	0.000608889	0.000611885	TCCR	IL27RA	Q6UWB1
SL010460	996	0.00602912	0.00129887	1.33747e-05	0.0202086	0.00522817	0.00146863	0.00126708	FCG2B	FCGR2B	P31994
SL005488	992	0.00257939	0.000558148	1.47031e-05	0.0187348	0.0031601	0.000630679	2.94405e-06	SPARCL1	SPARCL1	Q14515
SL004159	989	0.0027889	0.000603569	1.47163e-05	0.0192628	0.00206516	0.000680838	0.00724233	TRAIL R4	TNFRSF10D	Q9UBN6
SL004160	994	0.00167823	0.000366025	1.73482e-05	0.0187969	0.00187767	0.000414228	2.76648e-05	TrkB	NTRK2	Q16620
SL004876	992	-0.00161432	0.000352367	1.75776e-05	0.0196189	-0.000921965	0.000395241	0.0471637	Kallistatin	SERPINA4	P29622
SL003341	996	0.0035084	0.000765852	1.75776e-05	0.0195581	0.00377953	0.000866774	5.79199e-05	Fibrinogen g-chain dimer	FGG	P02679
SL003332	993	0.00275981	0.000602688	1.76937e-05	0.0177369	0.00224211	0.000681263	0.00319312	MMP-17	MMP17	Q9ULZ9
SL007453	985	0.00316249	0.000691846	1.83449e-05	0.0194386	0.00142285	0.00077493	0.135267	MK11	MAPK11	Q15759
SL002539	987	0.00267656	0.000588248	2.01779e-05	0.0195816	0.00257568	0.000665429	0.000411241	OPG	TNFRSF11B	O00300
SL001726	987	0.0040199	0.000885926	2.13345e-05	0.0193904	0.00351971	0.001002	0.00148983	GM-CSF	CSF2	P04141
SL003328	993	0.00151347	0.000334134	2.20692e-05	0.018488	0.00168272	0.000377684	3.86659e-05	Factor I	CFI	P05156
SL009089	993	-0.00268862	0.000595713	2.37313e-05	0.0183815	-0.00254187	0.000673811	0.000591199	PGCB	BCAN	Q96GW7
SL004396	997	0.00730124	0.00162938	2.74545e-05	0.01356	0.00775848	0.00184468	0.000108204	STAT1	STAT1	P42224
SL000045	992	-0.00278219	0.000622408	2.88123e-05	0.0156933	-0.00306119	0.000703872	6.05993e-05	IGFBP-3	IGFBP3	P17936
SL003685	994	0.0036724	0.000826816	3.27179e-05	0.0183995	0.00391555	0.000935168	0.000116774	PBEF	NAMPT	P43490
SL014228	990	0.00255189	0.000577387	3.60662e-05	0.0180112	0.00162237	0.000650664	0.0324384	SLAF6	SLAMF6	Q96DU3
SL014268	991	0.001818	0.000412532	3.81186e-05	0.0174823	0.00107571	0.000463834	0.0487026	OX2G	CD200	P41217
SL002517	989	0.00250784	0.000569624	3.87803e-05	0.0175417	0.00199385	0.000643459	0.00589819	TNF-a	TNF	P01375
SL000022	991	0.00313505	0.000713013	3.96883e-05	0.018101	0.00338032	0.000807313	0.000116774	D-dimer	FGA FGB FGG	P02671 P02675 P02679
SL000062	997	0.00526719	0.00120033	4.11635e-05	0.00579044	0.00582515	0.0013586	7.83932e-05	PSA	KLK3	P07288
SL004516	993	0.00459991	0.0010541	4.58187e-05	0.0176558	0.00381656	0.00119092	0.00420187	MBL	MBL2	P11226
SL005177	997	0.0052722	0.00121011	4.71524e-05	0.017669	0.00526069	0.00137021	0.000462512	IL-1F6	IL36A	Q9UHA7
SL000541	994	-0.00272407	0.00062579	4.7853e-05	0.0175176	-0.00211745	0.000707272	0.0082178	Plasminogen	PLG	P00747
SL008644	978	-0.00313334	0.000722545	5.14625e-05	0.0173135	-0.00312635	0.000817723	0.000492568	BST1	BST1	Q10588
SL009213	997	0.0040588	0.000937387	5.27788e-05	0.0162204	0.00398716	0.00106139	0.000624171	Cathepsin A	CTSA	P10619
SL006675	991	0.00225638	0.000522396	5.52274e-05	0.0147647	0.00231682	0.000591051	0.000340468	CKAP2	CKAP2	Q8WWK9
SL014470	987	-0.00229272	0.000531115	5.57282e-05	0.015487	-0.00258142	0.000600075	7.4359e-05	BCAR3	BCAR3	O75815
SL000415	996	0.00140027	0.000325171	5.82072e-05	0.0172105	0.00171647	0.000367339	1.46195e-05	Factor H	CFH	P08603
SL004183	989	-0.00138766	0.000325007	6.82999e-05	0.0167771	-0.000900179	0.00036625	0.0354009	P-Cadherin	CDH3	P22223
SL003177	993	0.00202448	0.000476001	7.3243e-05	0.0143277	0.0018044	0.000538356	0.00260719	sICAM-2	ICAM2	P13598
SL006922	988	0.00197517	0.000467722	8.33999e-05	0.0166559	0.0017003	0.000528451	0.00404944	RAD51	RAD51	Q06609
SL008122	997	-0.00693814	0.00166701	0.000108248	0.0125502	-0.00613684	0.00188677	0.00362772	DUS3	DUSP3	P51452
SL005572	995	0.0016711	0.000406293	0.000133205	0.0151747	0.00221449	0.00045809	6.83157e-06	Gelsolin	GSN	P06396
SL002561	991	0.00317482	0.000772168	0.000133765	0.0137357	0.00298126	0.000873015	0.00208178	PTHrP	PTHLH	P12272
SL004338	989	-0.00223396	0.000546108	0.000145842	0.0149731	-0.00165358	0.000617306	0.0201983	FGF-20	FGF20	Q9NP95
SL018891	987	0.00252351	0.000617633	0.000148576	0.0153531	0.0019684	0.000698369	0.0136209	DSCAM	DSCAM	O60469
SL011769	993	0.00351917	0.000862771	0.000152516	0.0141345	0.00277341	0.000976349	0.0128576	AN32B	ANP32B	Q92688
SL000589	991	-0.00466134	0.00114479	0.000156829	0.0154731	-0.00487656	0.0012989	0.000628052	TSH	CGA TSHB	P01215 P01222
SL008931	997	0.00601336	0.00148015	0.000162509	0.0153631	0.00356422	0.00166772	0.0735072	CD177	CD177	Q8N6Q3
SL008193	996	0.00292664	0.000723491	0.000174542	0.0144591	0.00297468	0.000819336	0.000991564	NID2	NID2	Q14112
SL008372	991	0.00218747	0.000541804	0.000179966	0.0149874	0.00197356	0.000612769	0.00401397	FLRT3	FLRT3	Q9NZU0
SL001943	994	0.00232829	0.000577431	0.000183476	0.015073	0.00262966	0.000653183	0.000227086	IL-6 sRa	IL6R	P08887
SL001896	993	0.00196945	0.000489003	0.000186677	0.0147887	0.00170899	0.000552872	0.00603389	Clusterin	CLU	P10909
SL002522	988	-0.00285771	0.000715505	0.000214215	0.0137172	-0.00372004	0.000807517	1.96726e-05	Rb	RB1	P06400
SL006550	993	-0.00167761	0.000420154	0.000214637	0.0148347	-0.000788163	0.000471437	0.180551	ECM1	ECM1	Q16610
SL007181	994	0.00299646	0.000752861	0.000225742	0.0119603	0.00132584	0.000844708	0.213183	TYK2	TYK2	P29597
SL000011	992	0.00261307	0.000656903	0.000227342	0.0130023	0.00197671	0.000742618	0.0210571	AFP	AFP	P02771
SL004862	992	0.00209022	0.000525938	0.000230205	0.0135373	0.00162727	0.00059411	0.0170748	PD-L2	PDCD1LG2	Q9BQ51
SL001691	996	0.00366514	0.000923596	0.000235303	0.0115515	0.00347057	0.00104507	0.00289465	FGF7	FGF7	P21781
SL010451	995	0.00282727	0.000713655	0.000241208	0.0118592	0.0026921	0.000807594	0.00277501	CFC1	CFC1	P0CG37
SL004852	987	0.00387901	0.000979213	0.000241208	0.0145686	0.00240099	0.00110339	0.0674076	B7-H1	CD274	Q9NZQ7
SL000485	993	0.00375349	0.000950541	0.000253309	0.0137845	0.00270439	0.00107407	0.0303386	IL-9	IL9	P15248
SL015510	997	0.00486568	0.00123721	0.000269834	0.0117229	0.00434213	0.00140044	0.00587288	UCRP	ISG15	P05161
SL006830	991	0.00236149	0.000601997	0.000280589	0.013795	0.00172525	0.00068037	0.0290157	complement factor H-related 5	CFHR5	Q9BXR6
SL017106	981	0.0028675	0.000732249	0.000287957	0.0142593	0.00147342	0.000825127	0.148804	IFN10	IFNA10	P01566
SL000338	994	0.00360985	0.000922773	0.000291829	0.0135594	0.00320133	0.00104393	0.00650149	Calpastatin	CAST	P20810
SL000248	994	0.00101029	0.000258326	0.000292054	0.0141185	0.00094681	0.000292104	0.00376338	a1-Antichymotrypsin	SERPINA3	P01011
SL001796	990	0.002596	0.000663816	0.000292054	0.0138247	0.00114299	0.000744713	0.226771	Myeloperoxidase	MPO	P05164
SL001802	988	0.00217832	0.000557703	0.00029722	0.0128221	0.00166944	0.000629919	0.0216109	IFN-g	IFNG	P01579
SL007022	994	0.00241539	0.000619551	0.000305332	0.0121725	0.00231792	0.000701269	0.00305154	HNRPQ	SYNCRIP	O60506
SL018971	985	0.00343742	0.000885786	0.000327872	0.0139728	0.00266918	0.00100161	0.0209536	ZNRF3	ZNRF3	Q9ULT6
SL016554	982	0.00298044	0.000774837	0.00037488	0.0137684	0.00222751	0.00087595	0.0285425	PDE9A	PDE9A	O76083
SL004724	992	0.00215985	0.000561555	0.00037488	0.0127257	0.00174012	0.000634917	0.0170232	MOZ	KAT6A	Q92794
SL000124	996	0.0015691	0.000408071	0.000375503	0.0128495	0.0018253	0.00046145	0.00029558	MMP-2	MMP2	P08253
SL012698	994	0.003979	0.00103536	0.000377786	0.0128449	0.00340579	0.00117102	0.0105504	KI2L4	KIR2DL4	Q99706
SL004356	991	0.00348095	0.000911215	0.000413099	0.0131447	0.00268582	0.00103222	0.0244793	LAG-1	CCL4L1	Q8NHW4
SL004081	996	0.00216617	0.000567109	0.000413099	0.0127632	0.00222699	0.000641734	0.00171677	Bone proteoglycan II	DCN	P07585
SL000089	991	0.00212268	0.000556277	0.000418602	0.012471	0.00185696	0.000629455	0.00938015	TGF-b3	TGFB3	P10600
SL008588	995	0.00293827	0.000771839	0.00043288	0.0111011	0.00231201	0.000872618	0.0216111	SLAF5	CD84	Q9UIB8
SL008416	994	0.00166664	0.000438619	0.000444298	0.0132171	0.00146007	0.000495907	0.00951531	MRC2	MRC2	Q9UBG0
SL012707	994	0.00193708	0.000510461	0.000452201	0.0128982	0.0023715	0.000576608	0.000159629	PCSK9	PCSK9	Q8NBP7
SL004304	991	-0.00229727	0.000606189	0.000460456	0.0116533	-0.00245465	0.000685393	0.00117473	STX1a	STX1A	Q16623
SL004690	988	0.00272795	0.000722156	0.000482242	0.0132132	0.00238382	0.000816893	0.0102746	WISP-3	WISP3	O95389
SL000321	994	0.00145358	0.000384914	0.000483169	0.0129995	0.00156177	0.000435377	0.00115203	C5b, 6 Complex	C5 C6	P01031,P13671
SL005212	990	0.00277808	0.000737029	0.000495909	0.0126605	0.00175657	0.000831539	0.0777485	Prolactin Receptor	PRLR	P16471
SL003310	992	0.00461988	0.00122758	0.000506404	0.0123353	0.00369048	0.00138747	0.021135	VEGF121	VEGFA	P15692
SL004829	991	0.00434553	0.00116389	0.000568053	0.0128497	0.00372735	0.00131747	0.0132079	S100A7	S100A7	P31151
SL000424	993	0.00146237	0.000392125	0.000576341	0.0127575	0.00160234	0.00044339	0.0010545	Fibrinogen	FGA FGB FGG	P02671 P02675 P02679
SL005194	997	0.00435738	0.00116884	0.000578084	0.00958343	0.00387848	0.00132308	0.00989148	JAM-C	JAM3	Q9BX67
SL005169	995	0.00209009	0.000561109	0.000583731	0.0127545	0.0013836	0.000633086	0.0659262	sICAM-5	ICAM5	Q9UMF0
SL004125	994	0.00191145	0.000513898	0.000594975	0.0125891	0.0021509	0.000580942	0.000757559	IR	INSR	P06213
SL003774	989	0.00248467	0.000668664	0.000602356	0.0105994	0.00217493	0.000756627	0.011666	Apoptosis regulator Bcl-W	BCL2L2	Q92843
SL000377	988	0.00354296	0.000958203	0.000645625	0.0123006	0.00311655	0.00108329	0.0116032	CK-BB	CKB	P12277
SL008177	993	0.00136269	0.000370601	0.000697387	0.0110238	0.00130061	0.000419389	0.00587288	C1QBP	C1QBP	Q07021
SL003753	985	-0.00434162	0.00118793	0.000758324	0.0122429	-0.00461199	0.00134466	0.00197682	DLC8	DYNLL1	P63167
SL011535	991	0.0030238	0.000828913	0.000776737	0.0109775	0.00181368	0.000935488	0.11065	RBM39	RBM39	Q14498
SL002662	992	-0.00187352	0.000513686	0.000777097	0.0115122	-0.00116949	0.000578563	0.0943478	Coagulation Factor XI	F11	P03951
SL000546	990	-0.00322433	0.00088593	0.000798835	0.0121749	-0.00429116	0.00100038	7.80184e-05	PRL	PRL	P01236
SL004466	994	-0.00159904	0.000439728	0.000806357	0.0117711	-0.00126393	0.000496788	0.028493	Heparin cofactor II	SERPIND1	P05546
SL008904	985	0.00195249	0.000538504	0.000838534	0.0118649	0.00200832	0.000609327	0.00314726	LYVE1	LYVE1	Q9Y5Y7
SL007237	995	0.00232176	0.000640754	0.000843668	0.0120946	0.00306263	0.000723507	9.78684e-05	MP2K4	MAP2K4	P45985
SL006915	985	0.00203855	0.00056443	0.000880993	0.0114706	0.00153751	0.000638033	0.0397848	IL-27	IL27 EBI3	Q8NEV9 Q14213
SL006522	995	0.00265275	0.000738302	0.00094317	0.0116953	0.00268651	0.000835382	0.00406179	LG3BP	LGALS3BP	Q08380
SL000048	993	-0.00157539	0.000438522	0.000943258	0.0115086	-0.000969085	0.000494235	0.105993	Protein C	PROC	P04070
SL002525	992	0.00127207	0.000357046	0.0010531	0.0114755	0.00141962	0.000403821	0.00147786	C2	C2	P06681
SL011510	992	0.00225532	0.000633527	0.00106207	0.0094777	0.00185918	0.00071631	0.0248423	Somatostatin-28	SST	P61278
SL000268	990	-0.00178832	0.000504686	0.00112769	0.0114363	-0.00117903	0.000570076	0.0855924	Angiostatin	PLG	P00747
SL007871	992	-0.00200959	0.000568188	0.00115336	0.0098	-0.0023134	0.000642092	0.0010937	Cytidylate kinase	CMPK1	P30085
SL000440	997	0.0045021	0.00127411	0.00116485	0.0114304	0.0046705	0.00144263	0.00380477	Hemopexin	HPX	P02790
SL013548	988	0.00175089	0.000495565	0.00116485	0.0111687	0.00160561	0.00056019	0.0119484	IL-34	IL34	Q6ZMJ4
SL005214	991	0.00115614	0.000328109	0.00120404	0.0114359	0.00055413	0.000368789	0.238166	Semaphorin-6A	SEMA6A	Q9H2E6
SL004008	996	0.00251877	0.000716516	0.00123918	0.0112873	0.00171282	0.000808964	0.0769513	Proteinase-3	PRTN3	P24158
SL010508	988	0.00199417	0.000568946	0.00128523	0.0110771	0.00149582	0.000642766	0.0477723	PAK3	PAK3	O75914
SL001880	987	0.00254011	0.000725528	0.00130165	0.0109619	0.00160257	0.000817966	0.106209	IFN-b	IFNB1	P01574
SL002505	993	0.00332185	0.000949354	0.00130822	0.0101204	0.00216253	0.00107183	0.0945656	ANP	NPPA	P01160
SL000070	991	-0.00219371	0.000627605	0.0013236	0.0104226	-0.00142966	0.000708357	0.0945656	Glypican 3	GPC3	P51654
SL000145	995	-0.00142116	0.000408041	0.00138308	0.0111085	-0.00136033	0.000461734	0.00947882	IL-1 sRII	IL1R2	P27930
SL011770	992	0.0017137	0.000493564	0.00143637	0.00968937	0.00175741	0.000558643	0.00507069	LCMT1	LCMT1	Q9UIC8
SL004915	997	-0.0063458	0.0018599	0.00178444	0.00726843	-0.00485009	0.00210351	0.0501875	NCC27	CLIC1	O00299
SL007261	997	-0.00499087	0.00146295	0.00178444	0.00716437	-0.00439538	0.001656	0.0214005	AMPM2	METAP2	P50579
SL000550	997	0.0172306	0.00506739	0.00185463	0.00997456	0.0140418	0.00573372	0.0362028	PCI	SERPINA5	P05154
SL000433	996	0.00466522	0.00137294	0.00186649	0.00981124	0.00166187	0.00154209	0.432013	Glucagon	GCG	P01275
SL002722	985	0.00194589	0.000573801	0.00190942	0.0102318	0.00167256	0.000649126	0.0261284	CD38	CD38	P28907
SL006705	994	0.00236509	0.000697678	0.00191372	0.00904476	0.00174336	0.000790006	0.062792	PFD5	PFDN5	Q99471
SL004639	993	0.00146351	0.000434829	0.00208378	0.0102502	0.00183122	0.000491281	0.000692569	TrkC	NTRK3	Q16288
SL000019	991	-0.00140469	0.000418957	0.00217787	0.0102683	-0.000561559	0.000470108	0.376205	Apo A-I	APOA1	P02647
SL003196	997	0.00479649	0.00143605	0.00227415	0.00886837	0.00485892	0.00162603	0.00834961	TARC	CCL17	Q92583
SL000280	994	0.00240083	0.000719302	0.00228892	0.0100206	0.00193978	0.000814048	0.042308	GOT1	GOT1	P17174
SL007310	997	-0.00522043	0.00156487	0.00229798	0.00721823	-0.00416618	0.00177046	0.0453996	RAC3	RAC3	P60763
SL000526	988	-0.00221468	0.000666438	0.00239944	0.00978316	-0.00295057	0.000753362	0.000344203	MMP-8	MMP8	P22894
SL004364	992	0.00184516	0.000555307	0.00239944	0.00903541	0.00159467	0.000627621	0.0286569	TACI	TNFRSF13B	O14836
SL000645	993	0.00259295	0.000782236	0.00246315	0.00999445	0.0010857	0.000879121	0.358034	MMP-10	MMP10	P09238
SL000556	988	0.00222842	0.000673079	0.00249379	0.00939118	0.00209968	0.000762458	0.0164309	PKC-G	PRKCG	P05129
SL005205	992	0.00191325	0.000578985	0.00254438	0.00949632	0.00140678	0.000654197	0.0712564	NKp30	NCR3	O14931
SL000254	992	0.00119281	0.000361323	0.00256876	0.00930368	0.00181181	0.000406523	3.85298e-05	Albumin	ALB	P02768
SL002524	990	0.00197321	0.000600227	0.00269126	0.00885435	0.00147343	0.000678744	0.0680555	sCD4	CD4	P01730
SL015728	989	0.00250785	0.000765704	0.00280366	0.00921112	0.0015284	0.000862524	0.151886	GCKR	GCKR	Q14397
SL000528	995	-0.00316184	0.000965963	0.00281699	0.00800144	-0.00284801	0.0010927	0.0242633	NADPH-P450 Oxidoreductase	POR	P16435
SL000509	990	0.00180584	0.000554016	0.00294975	0.00959298	0.00129625	0.000625259	0.0848592	Lymphotoxin b R	LTBR	P36941
SL010496	991	0.00161535	0.000495925	0.0029677	0.00929581	0.0013665	0.000560882	0.0372743	CDK5/p35	CDK5 CDK5R1	Q00535 Q15078
SL004742	991	-0.00148113	0.000456059	0.00306207	0.00955568	-0.000500967	0.000511527	0.487635	Afamin	AFM	P43652
SL003199	995	0.00136673	0.000421029	0.0030719	0.00949992	0.00130816	0.000476472	0.0168121	sTie-1	TIE1	P35590
SL005210	990	0.0017498	0.000539254	0.00308045	0.00943103	0.0016569	0.000608775	0.0178768	Nr-CAM	NRCAM	Q92823
SL000038	990	0.00299441	0.000923481	0.00309934	0.00919954	0.00272229	0.00104483	0.0242795	MCP-1	CCL2	P13500
SL011404	983	0.00189026	0.000585385	0.00324155	0.00903623	0.00162423	0.000663942	0.0364043	PDE4D	PDE4D	Q08499
SL013490	990	-0.00153644	0.000475926	0.00324311	0.00935866	-0.00199077	0.000537025	0.000746214	BOC	BOC	Q9BWV1
SL004661	990	0.00187174	0.000585277	0.00359284	0.00885681	0.00155316	0.000662652	0.0462029	Aggrecan	ACAN	P16112
SL000087	992	0.00390949	0.00123576	0.00403275	0.00727026	0.00269746	0.00139648	0.112307	IL-6	IL6	P05231
SL000581	996	0.00273699	0.000866994	0.00411817	0.0075957	0.00261561	0.00098178	0.0209536	SOD	SOD1	P00441
SL000055	992	0.00125007	0.000397547	0.00428594	0.00881365	0.00127646	0.000449735	0.012924	Cadherin E	CDH1	P12830
SL004486	997	0.0030427	0.000967796	0.00428594	0.00723703	0.00257412	0.00109537	0.0456158	VEGF-C	VEGFC	P49767
SL006397	994	0.00134861	0.000429328	0.00431786	0.00880607	0.00120299	0.000485821	0.0338994	NRP1	NRP1	O14786
SL007336	993	-0.00197183	0.000631949	0.00462538	0.00842892	-0.00142138	0.000714087	0.100335	SET	SET	Q01105
SL007642	994	0.00196124	0.000634245	0.00507029	0.00702282	0.00121046	0.00071608	0.17565	ANGL4	ANGPTL4	Q9BY76
SL015046	989	0.00145423	0.000470859	0.00512562	0.0083691	0.000942823	0.000530919	0.150946	AMGO2	AMIGO2	Q86SJ2
SL000309	984	0.00229974	0.000744792	0.00512839	0.00859498	0.00229715	0.000843108	0.0177592	C1q	C1QA C1QB C1QC	P02745 P02746 P02747
SL000508	992	-0.00163758	0.00053108	0.00519097	0.00793779	-0.00148173	0.000600633	0.0345836	Lymphotoxin a2/b1	LTA LTB	P01374, Q06643
SL004492	986	0.00162864	0.000528509	0.00521503	0.00843475	0.00100529	0.000596813	0.177077	TLR2	TLR2	O60603
SL003080	994	0.00267494	0.000872083	0.0054566	0.00615726	0.00256316	0.000987379	0.0248423	MIF	MIF	P14174
SL013240	994	0.0037402	0.00122154	0.00554519	0.00636065	0.00315512	0.00138256	0.0532031	CRK	CRK	P46108
SL004859	981	0.00235015	0.000773088	0.00595186	0.00823177	0.00199614	0.00087585	0.053435	GITR	TNFRSF18	Q9Y5U5
SL004899	992	0.00225227	0.000743779	0.00617369	0.00643252	0.00250089	0.00084167	0.00878015	HSP70 protein 8	HSPA8	P11142
SL008039	997	0.00319012	0.0010539	0.0061853	0.00611161	0.00375177	0.00119272	0.00507069	AK1A1	AKR1A1	P14550
SL000467	985	0.00132597	0.00043846	0.0062326	0.00820551	0.00144716	0.00049671	0.0104058	IgG	IGHG1 IGHG2 IGHG3 IGHG4 IGK@ IGL@	P01857
SL007756	997	-0.00288642	0.000956241	0.00633493	0.00743752	-0.00186754	0.00108054	0.163575	GDF2	GDF2	Q9UK05
SL000420	997	0.00511632	0.00169937	0.00648638	0.00744439	0.00810931	0.00191347	9.66013e-05	Ferritin	FTH1 FTL	P02794 P02792
SL004580	993	-0.00195911	0.00065297	0.00669818	0.00713275	-0.00241776	0.000737838	0.00334132	Macrophage scavenger receptor	MSR1	P21757
SL005166	994	0.0021642	0.00072149	0.00670032	0.00652369	0.0021463	0.000816453	0.0228695	Galectin-7	LGALS7	P47929
SL006713	995	0.00225801	0.000753636	0.00676365	0.00790544	0.0020406	0.000853145	0.0415273	Collectin Kidney 1	COLEC11	Q9BWP8
SL010457	992	0.00182848	0.000612709	0.00701717	0.00757727	0.000859651	0.000691316	0.354182	DLL4	DLL4	Q9NR61
SL010513	997	-0.00574995	0.00193063	0.0071401	0.00624224	-0.00453489	0.00218449	0.0844224	PRKACA	PRKACA	P17612
SL006460	993	0.00153137	0.000514799	0.00720572	0.00751053	0.000867841	0.000580764	0.241665	GP1BA	GP1BA	P07359
SL002792	997	-0.00508281	0.0017089	0.00720572	0.00563365	-0.00383083	0.00193312	0.102094	BARK1	ADRBK1	P25098
SL000249	987	0.00201956	0.000679247	0.00721944	0.00736698	0.00146588	0.000768514	0.117959	a1-Antitrypsin	SERPINA1	P01009
SL000601	993	-0.000715301	0.000240884	0.00729287	0.00778298	-0.000535332	0.000272166	0.105024	Transferrin	TF	P02787
SL004891	995	0.00268217	0.000903925	0.00733184	0.00604771	0.00246227	0.00102279	0.0399622	hnRNP A2/B1	HNRNPA2B1	P22626
SL003542	997	-0.003708	0.00125119	0.00740469	0.00753373	-0.000893256	0.0014038	0.674156	NG36	EHMT2	Q96KQ7
SL007673	990	-0.00155618	0.000528917	0.00791816	0.00746349	-0.00171157	0.000598334	0.012134	NET4	NTN4	Q9HB63
SL000306	993	0.00267809	0.000913485	0.00817187	0.00675603	0.00121776	0.00102796	0.379307	BNP-32	NPPB	P16860
SL014111	989	0.00159991	0.000545995	0.00819608	0.00670224	0.00179974	0.00061596	0.0101769	KIRR3	KIRREL3	Q8IZU9
SL011768	992	0.00268591	0.000919399	0.0084156	0.00635857	0.00258579	0.00104142	0.033334	NUDC3	NUDCD3	Q8IVD9
SL003650	997	-0.00674259	0.00232947	0.00914738	0.00447252	-0.00517897	0.00263552	0.105279	Alpha enolase	ENO1	P06733
SL019979	989	0.0029233	0.00101878	0.0098811	0.00697571	0.00270925	0.00115264	0.0456158	H2A3	HIST3H2A	Q7L7L0
SL011629	996	-0.00277629	0.000971071	0.0101891	0.00510861	-0.00220315	0.00109818	0.0970036	AIP	AIP	O00170
SL008094	988	0.00236636	0.000829805	0.0104069	0.00677245	0.00227368	0.000936755	0.0380784	PGM1	PGM1	P36871
SL004070	989	0.0021455	0.000753998	0.0105908	0.00632234	0.00203777	0.000854996	0.042308	Ubiquitin	RPS27A	P62979
SL010328	993	-0.00104354	0.000367496	0.010767	0.00701313	-0.000664605	0.000414898	0.202948	MED-1	MED1	Q15648
SL000572	997	0.0067429	0.00237643	0.0108202	0.00689824	0.00302765	0.00267901	0.406471	SAA	SAA1	P0DJI8
SL000396	991	-0.00197495	0.000697406	0.0109898	0.00642616	-0.00182155	0.000788578	0.0497265	Cytochrome c	CYCS	P99999
SL014469	997	0.00332804	0.00117589	0.0110245	0.00534109	0.00335723	0.00133146	0.0300916	SHC1	SHC1	P29353
SL000836	992	-0.00272112	0.000964988	0.0113652	0.00666735	-0.00152672	0.00108942	0.277397	Hemoglobin	HBA1 HBB	P69905, P68871
SL004625	987	0.0015679	0.000561293	0.0122952	0.00652022	0.00144763	0.000634779	0.0533263	ADAMTS-4	ADAMTS4	O75173
SL003803	987	-0.00149568	0.000535477	0.0122952	0.00614426	-0.00128173	0.000604278	0.0763713	ERBB4	ERBB4	Q15303
SL004760	997	0.00341848	0.00122564	0.0124242	0.00489607	0.0037081	0.00138765	0.0205451	PAFAH beta subunit	PAFAH1B2	P68402
SL004804	987	0.00149523	0.00054157	0.0135195	0.00630948	0.000350301	0.00060723	0.710002	Nectin-like protein 1	CADM3	Q8N126
SL012469	991	-0.00229796	0.000835091	0.013875	0.0062518	-0.00192306	0.000944609	0.0916043	GPC5	GPC5	P78333
SL007151	992	-0.00215651	0.000786329	0.0142435	0.00631911	-0.0019765	0.000889382	0.0607499	GPDA	GPD1	P21695
SL010500	997	-0.00503657	0.00183709	0.0142558	0.00520588	-0.00381337	0.00207848	0.13547	LYNB	LYN	P07948
SL005155	997	0.00508428	0.00185692	0.0143854	0.0064941	0.00393479	0.00210114	0.126605	Cripto	TDGF1	P13385
SL004155	995	0.00284466	0.00104314	0.0148444	0.0063812	0.00334255	0.00118026	0.0131177	PDGF Rb	PDGFRB	P09619
SL003739	989	0.00198559	0.000728531	0.0148895	0.00621044	0.000645566	0.000818372	0.593789	DcR3	TNFRSF6B	O95407
SL001761	985	0.00163389	0.000599951	0.0149581	0.00631694	0.000982506	0.0006775	0.256929	Troponin I	TNNI3	P19429
SL000310	994	0.00113242	0.000416858	0.0152385	0.00633859	0.00136076	0.000471574	0.0113152	C1r	C1R	P00736
SL001791	985	-0.00283399	0.00104543	0.0154777	0.00628102	-0.0028747	0.00118107	0.037448	Osteocalcin	BGLAP	P02818
SL020171	989	0.00256843	0.000948166	0.0155418	0.00616356	0.00218781	0.00107392	0.0916043	HHLA2	HHLA2	Q9UM44
SL004940	997	0.00448238	0.00165527	0.0155541	0.00463244	0.0050209	0.0018739	0.0201962	PTP-1C	PTPN6	P29350
SL004939	986	0.00196954	0.000731155	0.0162028	0.00591163	0.00100816	0.000825698	0.364392	PTP-1B	PTPN1	P18031
SL004924	995	-0.0052647	0.00195506	0.0162149	0.00516635	-0.00512958	0.00221294	0.0487651	eIF-4H	EIF4H	Q15056
SL010489	995	0.00176104	0.000654529	0.0162964	0.00490886	0.00205191	0.000740456	0.0156194	CAMK1	CAMK1	Q14012
SL003184	995	0.00347958	0.00129352	0.0162964	0.00624797	0.00516294	0.00145984	0.00137844	sLeptin R	LEPR	P48357
SL010927	996	-0.00477914	0.00177949	0.0164791	0.00478427	-0.00414923	0.00201436	0.087194	IMB1	KPNB1	Q14974
SL004147	991	0.0014129	0.000526249	0.0164926	0.00586369	0.000847623	0.000594428	0.266774	IL-10 Rb	IL10RB	Q08334
SL004921	997	-0.00477523	0.00178565	0.0169896	0.00456996	-0.00359944	0.00202032	0.149657	NDP kinase B	NME2	P22392
SL007471	994	-0.00147936	0.000555026	0.0174099	0.0054207	-0.00149695	0.000627931	0.042308	COLEC12	COLEC12	Q5KU26
SL008956	985	-0.00200485	0.000754996	0.0178997	0.00601846	-0.00224049	0.000855022	0.0233471	ARSB	ARSB	P15848
SL018900	995	-0.0046885	0.0017682	0.0180713	0.00576595	-0.00531471	0.0020007	0.0213056	FTCD	FTCD	O95954
SL003704	995	0.0034296	0.00129412	0.0181168	0.00460877	0.00320518	0.0014651	0.0656768	BID	BID	P55957
SL006998	997	-0.00395534	0.00149316	0.0181473	0.00445272	-0.00287679	0.00168912	0.171516	PDPK1	PDPK1	O15530
SL004154	991	0.00124952	0.00047496	0.0191099	0.00596573	0.00188055	0.000535494	0.00149086	NCAM-L1	L1CAM	P32004
SL010502	996	0.00387577	0.00147894	0.0196491	0.00439848	0.00414521	0.00167491	0.0339568	MK08	MAPK8	P45983
SL010454	995	0.00102181	0.000390184	0.0197215	0.00561152	0.00144663	0.000440346	0.00325186	Contactin-4	CNTN4	Q8IWV2
SL005222	992	0.00282524	0.00108687	0.0208274	0.00547596	0.00248345	0.00122951	0.0944123	SREC-II	SCARF2	Q96GP6
SL000605	996	0.00322325	0.00125504	0.0227444	0.00430188	0.00332136	0.00142116	0.046782	Ubiquitin+1	RPS27A	P62979
SL004351	993	0.00165792	0.000646538	0.0229642	0.00533926	0.000732132	0.000728991	0.473395	IL-17E	IL25	Q9H293
SL000468	996	-0.00284666	0.00111313	0.0233851	0.00531098	-0.00338489	0.00126065	0.0199015	IgM	IGHM IGJ IGK@ IGL@	P01871
SL000622	993	0.00179239	0.000701574	0.0235171	0.00468969	0.00255875	0.00079208	0.00389051	Coagulation Factor V	F5	P12259
SL000342	990	0.00221901	0.000869424	0.0236494	0.00497533	0.00219011	0.000984073	0.0603822	Catalase	CAT	P04040
SL001995	997	0.00303551	0.00119037	0.023757	0.00528626	0.00272661	0.00134769	0.0940958	Angiopoietin-1	ANGPT1	Q15389
SL004354	993	-0.00103663	0.000412611	0.0263912	0.00533442	-0.00105035	0.000466818	0.0569996	IL-19	IL19	Q9UHD0
SL003785	997	0.004803	0.00191328	0.0264956	0.00426964	0.00642993	0.00216359	0.00878015	GAPDH, liver	GAPDH	P04406
SL016130	986	0.00194797	0.000778589	0.0270891	0.00496232	0.00163447	0.000880604	0.130803	BRF-1	BRF1	Q92994
SL000448	997	-0.00442866	0.00177067	0.0271007	0.00387886	-0.0039367	0.00200464	0.105421	HSP 27	HSPB1	P04792
SL004134	992	-0.00110002	0.000440828	0.0274994	0.00522305	-0.000620206	0.000497956	0.354061	CD27	CD27	P26842
SL000001	983	0.00168285	0.00067492	0.0276065	0.00523149	0.00130576	0.000762855	0.168964	MUC1	MUC1	P15941
SL005225	989	-0.00220635	0.000889101	0.0284866	0.00445843	-0.0024557	0.00100445	0.0364842	TrkA	NTRK1	P04629
SL010520	988	0.00122284	0.000493969	0.0289208	0.00477291	0.00124226	0.00055912	0.0607499	AURKB	AURKB	Q96GD4
SL018587	994	-0.00115016	0.00046473	0.0289211	0.00508418	-0.000870558	0.000525161	0.184742	ISLR2	ISLR2	Q6UXK2
SL008967	997	0.00452053	0.0018308	0.0293382	0.00510738	0.00421427	0.00207291	0.092062	SHPS1	SIRPA	P78324
SL013754	992	-0.00206257	0.000835848	0.0294149	0.00402857	-0.00173664	0.000945603	0.135267	RASA1	RASA1	P20936
SL006917	997	-0.00488938	0.00198189	0.0294149	0.00399764	-0.00365003	0.00224251	0.194122	LYN	LYN	P07948
SL003172	994	0.00315435	0.0012828	0.0300327	0.00413077	0.00321412	0.00145375	0.0622418	GCP-2	CXCL6	P80162
SL013165	992	0.00164415	0.00067001	0.0304045	0.00496001	0.0013259	0.000757544	0.157261	HMGN1	HMGN1	P05114
SL006406	994	0.0010319	0.000420901	0.0304895	0.00497755	0.000870136	0.000476696	0.137451	PLXC1	PLXNC1	O60486
SL004759	996	0.0029508	0.00120373	0.0304895	0.00404529	0.0027755	0.00136306	0.0916043	eIF-5	EIF5	P55010
SL002640	987	0.00179591	0.000732677	0.0304895	0.00488003	0.00143945	0.000827541	0.160716	PlGF	PGF	P49763
SL004869	997	-0.00500384	0.00204594	0.0308945	0.00381052	-0.0037801	0.00231512	0.193049	Carbonic anhydrase XIII	CA13	Q8N1Q1
SL009216	988	-0.00152087	0.000624313	0.0316733	0.00461696	-0.00135058	0.00070608	0.116895	dopa decarboxylase	DDC	P20711
SL011532	990	0.00217026	0.000891074	0.0316733	0.0043144	0.00196076	0.00100943	0.109886	ETHE1	ETHE1	O95571
SL010928	996	0.00198117	0.000814893	0.0319998	0.00380467	0.00208949	0.00092273	0.0553007	IMDH2	IMPDH2	P12268
SL000496	995	-0.00179114	0.000739809	0.0328461	0.00487825	-0.00170883	0.000837458	0.0910392	Lactoferrin	LTF	P02788
SL017289	989	0.00126508	0.000523196	0.0330739	0.00462648	0.000884058	0.000591993	0.241779	PolyUbiquitin K48	UBB	P0CG47
SL014468	989	-0.00191688	0.000793058	0.0331037	0.00433873	-0.00276643	0.000895547	0.00605917	SH21A	SH2D1A	O60880
SL005202	994	0.00447349	0.0018521	0.0332032	0.00481443	0.00503017	0.00209631	0.0407486	MSP	MST1	P26927
SL005199	996	0.00334265	0.00139498	0.0348825	0.00475841	0.0016562	0.00157539	0.445377	MICA	MICA	Q29983
SL010490	986	-0.0015228	0.000635538	0.0348825	0.00445172	-0.00156232	0.000720383	0.0682969	CAMK1D	CAMK1D	Q8IU85
SL000478	996	-0.00318774	0.00133169	0.0350428	0.0045605	-0.00267584	0.00150703	0.150946	IL-2	IL2	P60568
SL005574	990	-0.00241598	0.0010102	0.0351954	0.00445944	-0.00192782	0.00114165	0.176044	Aminoacylase-1	ACY1	Q03154
SL005263	995	0.00206144	0.000863248	0.0354798	0.00422923	0.00184592	0.000976814	0.122404	RAP	LRPAP1	P30533
SL014069	995	-0.00143326	0.000600953	0.0357149	0.00420544	-0.00160596	0.000679748	0.0444344	PCSK7	PCSK7	Q16549
SL007651	987	0.00195013	0.000820359	0.036421	0.00463912	0.000517233	0.000924141	0.721905	FGF23	FGF23	Q9GZV9
SL004157	992	0.0020907	0.00088105	0.0367754	0.00418523	0.00145054	0.000996692	0.254765	TRAIL R2	TNFRSF10B	O14763
SL010517	990	0.00126939	0.000536802	0.0375394	0.00449094	0.000979296	0.000607571	0.199464	STK16	STK16	O75716
SL017529	990	0.00181796	0.000769818	0.0378019	0.00444812	0.000993456	0.000870299	0.399962	KEAP1	KEAP1	Q14145
SL004642	986	0.00214342	0.000912937	0.0391547	0.00443753	0.00215538	0.00103257	0.0822512	ADAM 9	ADAM9	Q13443
SL005185	996	-0.00205232	0.000875356	0.039432	0.00384142	-0.00182037	0.000990438	0.135128	IL-23 R	IL23R	Q5VWK5
SL012740	992	-0.00141677	0.000604651	0.0395216	0.00374442	-0.00173281	0.000683959	0.0291436	ATS15	ADAMTS15	Q8TE58
SL003197	994	-0.00243305	0.00104141	0.0401822	0.00447165	-0.00254073	0.00117893	0.07054	TECK	CCL25	O15444
SL004359	990	-0.00134445	0.000576381	0.0405203	0.0042927	-0.00145673	0.000652365	0.0593457	Neurotrophin-3	NTF3	P20783
SL003173	996	0.00277138	0.00119058	0.0409746	0.00365619	0.00226088	0.00134812	0.179287	Gro-a	CXCL1	P09341
SL003646	997	-0.00408654	0.00177134	0.0432133	0.00330137	-0.00305675	0.00200447	0.230221	Tropomyosin 4	TPM4	P67936
SL005846	986	0.00156345	0.000678539	0.0434806	0.004209	0.00146775	0.000769134	0.117906	Moesin	MSN	P26038
SL004683	993	-0.001924	0.000839092	0.0447037	0.00377483	-0.00166204	0.000949075	0.157174	Noggin	NOG	Q13253
SL000638	985	0.00191062	0.00083391	0.0448476	0.00414619	0.00142972	0.000942193	0.23235	Cadherin-2	CDH2	P19022
SL004670	989	-0.00167673	0.000735402	0.0461005	0.0041405	-0.00153951	0.000832052	0.131889	Artemin	ARTN	Q5T4W7
SL000573	993	0.00105944	0.000465122	0.0462981	0.00390807	0.00143194	0.000525541	0.0177592	SAP	APCS	P02743
SL007153	993	-0.00180064	0.000791595	0.0465979	0.00418926	-0.00248326	0.000895171	0.0155142	PERL	LPO	P22079
SL000551	997	-0.00465579	0.00205081	0.0470689	0.00313081	-0.00369015	0.00232121	0.206289	PKC-A	PRKCA	P17252
SL016555	997	-0.00267805	0.00118281	0.047744	0.00290655	-0.00189892	0.00133825	0.269561	PDE11	PDE11A	Q9HCR9
SL012168	990	0.00152154	0.000672346	0.0478122	0.00357526	0.00127823	0.000760041	0.17779	LIN7B	LIN7B	Q9HAP6
SL003711	997	-0.00424268	0.00187634	0.0479686	0.00315332	-0.00339986	0.00212381	0.203076	Caspase-3	CASP3	P42574
SL008176	996	0.00226486	0.00100841	0.0498128	0.00308225	0.00247883	0.00114167	0.0680555	PSME1	PSME1	Q06323
SL005793	997	-0.00460237	0.00205198	0.050132	0.00311575	-0.00353319	0.00232232	0.231509	Cyclophilin F	PPIF	P30405
SL000271	989	-0.00113035	0.000505823	0.0511295	0.00398174	-0.00013068	0.000567746	0.899599	Angiotensinogen	AGT	P01019
SL007223	985	0.0016156	0.000724437	0.0516494	0.00391049	0.00193257	0.000820421	0.0451956	BCL6	BCL6	P41182
SL010384	994	0.00144496	0.00064977	0.0524014	0.00321221	0.00166683	0.000734733	0.0548067	Testican-1	SPOCK1	Q08629
SL004637	992	-0.00118858	0.000534623	0.0524014	0.00371968	-0.00122126	0.000604682	0.0944123	MSP R	MST1R	Q04912
SL004765	997	-0.00294291	0.00132404	0.0524014	0.00288157	-0.00172456	0.00149693	0.395967	MAPKAPK3	MAPKAPK3	Q16644
SL000449	997	-0.00291882	0.00131581	0.0529148	0.00304845	-0.00227408	0.00148925	0.229626	HSP 40	DNAJB1	P25685
SL005725	986	-0.00150995	0.000682642	0.0536943	0.00384135	-0.00139785	0.000771964	0.141631	GRB2-related adapter protein 2	GRAP2	O75791
SL004142	994	0.00178201	0.000805846	0.0536943	0.00343865	0.00113471	0.000911283	0.354061	Ephrin-B3	EFNB3	Q15768
SL002782	993	0.00116667	0.000528942	0.0543966	0.00321045	0.00142378	0.0005985	0.0426837	Adrenomedullin	ADM	P35318
SL010371	992	0.00104063	0.00047198	0.0544305	0.00361065	0.00103914	0.000533698	0.108894	CD39	ENTPD1	P49961
SL005358	997	0.00258473	0.00117507	0.055066	0.00290004	0.0028027	0.00133045	0.0786022	prostatic binding protein	PEBP1	P30086
SL003322	993	0.00124812	0.000567759	0.055169	0.00385006	0.00105195	0.000642317	0.191657	VEGF sR3	FLT4	P35916
SL007311	997	0.0045412	0.00207419	0.056346	0.00378504	0.000527533	0.00233278	0.900122	SNP25	SNAP25	P60880
SL010518	997	-0.00353568	0.00161559	0.0563906	0.0028197	-0.00254089	0.00182808	0.281851	TEC	TEC	P42680
SL006374	990	-0.00170009	0.000788055	0.0608988	0.00334243	-0.00163246	0.00089283	0.136737	BMX	BMX	P51813
SL004984	993	0.00136384	0.000632494	0.0609639	0.00333276	0.000697726	0.000714978	0.489163	14-3-3E	YWHAE	P62258
SL004704	995	0.00180809	0.000839801	0.0613743	0.00300998	0.00222992	0.000950678	0.0460694	COMMD7	COMMD7	Q86VX2
SL004477	995	0.00205413	0.0009594	0.0631333	0.00356176	3.01291e-05	0.00107728	0.99141	calgranulin B	S100A9	P06702
SL003717	988	0.00110642	0.000517792	0.0637109	0.00294172	0.00134336	0.000585304	0.0515106	Caspase-10	CASP10	Q92851
SL004588	994	-0.00136472	0.000638879	0.0637225	0.00343875	-0.00128502	0.000723238	0.150946	IL-1 R AcP	IL1RAP	Q9NPH3
SL005392	993	0.00159334	0.000747561	0.0643811	0.0032647	0.00149128	0.000847237	0.154644	Arylsulfatase A	ARSA	P15289
SL002756	986	0.00176855	0.000831845	0.0651412	0.0035219	0.00115784	0.000941629	0.360425	hnRNP K	HNRNPK	P61978
SL006913	997	-0.00296053	0.00139626	0.0659672	0.00270186	-0.00251254	0.00158069	0.206289	FYN	FYN	P06241
SL019096	989	0.00123183	0.000583077	0.0671337	0.00336282	0.000441327	0.000657498	0.656034	PIAS4	PIAS4	Q8N2W9
SL000598	997	0.00244259	0.00115795	0.0675652	0.00288441	0.00213856	0.00131098	0.193371	Tpo	THPO	P40225
SL003690	986	0.00139884	0.000668256	0.0701934	0.00317189	0.000500581	0.000753624	0.658556	RANK	TNFRSF11A	Q9Y6Q6
SL004714	994	-0.000790317	0.00037767	0.0701998	0.00338713	-0.00111972	0.000426812	0.0231833	LIF sR	LIFR	P42702
SL011530	997	0.00363416	0.00173749	0.0702663	0.00247172	0.00434879	0.00196676	0.0622418	DLRB1	DYNLRB1	Q9NP97
SL004339	987	0.00180967	0.000867096	0.0708737	0.00319453	0.00136835	0.000981261	0.279866	FGF-5	FGF5	P12034
SL014209	988	0.00167775	0.000803939	0.0708737	0.00319435	0.000720868	0.000906972	0.591471	KLRF1	KLRF1	Q9NZS2
SL004131	985	-0.00109427	0.000526401	0.0721436	0.00328035	-0.00110473	0.000596185	0.131294	B7-2	CD86	P42081
SL017188	997	-0.00360893	0.00173641	0.0721436	0.00229678	-0.00235077	0.00196428	0.376205	GSK-3 alpha/beta	GSK3A GSK3B	P49840 P49841
SL008703	986	0.00110853	0.000535151	0.0732726	0.00321168	0.000751895	0.000604268	0.354143	CBPE	CPE	P16870
SL004139	989	-0.000919242	0.000444652	0.0738952	0.00326081	-0.00129009	0.000502431	0.026753	Ephrin-A3	EFNA3	P52797
SL000553	997	-0.00457346	0.00221713	0.0745175	0.00240021	-0.00319622	0.00250871	0.338558	PKC-B-II	PRKCB	P05771
SL010379	995	-0.00144262	0.000699404	0.0745175	0.00280173	-0.00116576	0.000791104	0.249422	Semaphorin 3A	SEMA3A	Q14563
SL000588	988	0.00131328	0.000637567	0.0749208	0.00305371	0.000903734	0.000721159	0.350109	TMA	TPO	P07202
SL000084	996	-0.00215528	0.00105425	0.0776475	0.00252487	-0.00140308	0.00119224	0.382854	EGF	EGF	P01133
SL000322	992	0.000928887	0.000457	0.0797593	0.00306783	0.00109103	0.000516715	0.0777977	C6	C6	P13671
SL005178	991	-0.00112741	0.000560179	0.0835303	0.00282779	-0.00131128	0.000632936	0.0850023	IL-1F7	IL37	Q9NZH6
SL004148	989	-0.00121048	0.00060254	0.0841322	0.00293356	-0.00153592	0.000681657	0.0567358	IL-12 Rb1	IL12RB1	P42701
SL006091	995	0.00203272	0.00101322	0.0845586	0.00267575	0.00141453	0.00114656	0.358355	NCK1	NCK1	P16333
SL006480	991	-0.00111562	0.000557228	0.0852632	0.00283629	-0.0011937	0.000630147	0.121334	TRY3	PRSS3	P35030
SL000523	986	0.00149109	0.000745572	0.0855818	0.00298025	0.00133587	0.000843944	0.208471	MMP-13	MMP13	P45452
SL000158	989	0.0023608	0.00118173	0.0858987	0.00297571	0.00235486	0.00133752	0.154644	PSMA	FOLH1	Q04609
SL004342	990	-0.00145373	0.000730088	0.0871128	0.00273189	-0.00184342	0.00082545	0.0593457	FGF-8B	FGF8	P55075
SL016828	989	-0.00201415	0.00101766	0.0894748	0.00285068	-0.00272119	0.00115054	0.0442146	EGFRvIII	EGFR	P00533
SL001897	997	0.0019426	0.00098448	0.0905996	0.00229726	0.0019081	0.00111472	0.168964	SPINT2	SPINT2	O43291
SL007888	989	0.00176204	0.000896525	0.0921423	0.00280942	0.00100298	0.00101393	0.483287	Cystatin-S	CST4	P01036
SL004718	989	0.00111135	0.000568246	0.0941045	0.00257317	0.000682235	0.000642047	0.440122	Karyopherin-a2	KPNA2	P52292
SL007640	995	0.00192236	0.000983659	0.0942858	0.00243639	0.00161345	0.00111387	0.257395	CLC7A	CLEC7A	Q9BXN2
SL004652	991	0.000851962	0.000436318	0.0945215	0.00281277	0.000537095	0.000492585	0.42609	WIF-1	WIF1	Q9Y5W5
SL004821	995	0.00123844	0.000637479	0.0965773	0.00249287	0.00184836	0.000720232	0.0268016	S100A4	S100A4	P26447
SL004850	996	0.00156802	0.000814407	0.100378	0.00269259	0.00169631	0.000921552	0.134512	IL-17 sR	IL17RA	Q96F46
SL007280	992	0.000974472	0.000510455	0.103988	0.00253211	0.000843026	0.000577718	0.253239	CATC	CTSC	P53634
SL005229	996	0.00202382	0.00106032	0.103988	0.0020789	0.00212584	0.00120038	0.151993	ULBP-3	ULBP3	Q9BZM4
SL006629	995	-0.00210129	0.00110237	0.104442	0.00244518	-0.00169628	0.00124727	0.295767	SIRT2	SIRT2	Q8IXJ6
SL010830	997	-0.0024415	0.00128196	0.104691	0.00214892	-0.0011973	0.00144911	0.573215	41	EPB41	P11171
SL000542	995	0.00274829	0.00146033	0.110035	0.00183742	0.00138681	0.00165053	0.566168	gpIIbIIIa	ITGA2B ITGB3	P08514 P05106
SL002763	994	0.00133771	0.000713722	0.111803	0.0024825	0.000566893	0.000805895	0.638184	Kallikrein 11	KLK11	Q9UBX7
SL004097	997	-0.00242308	0.00129346	0.111884	0.00176416	-0.00172583	0.00146382	0.381956	SMAD3	SMAD3	P84022
SL005688	997	-0.00230495	0.00123137	0.112099	0.0019348	-0.00153217	0.00139329	0.420876	14-3-3 protein zeta/delta	YWHAZ	P63104
SL005165	996	0.00152021	0.000812961	0.11242	0.00209508	0.00153633	0.000919956	0.180876	Galectin-4	LGALS4	P56470
SL004814	988	0.00113453	0.000606959	0.112461	0.00240684	0.000425149	0.000685537	0.684098	Coactosin-like protein	COTL1	Q14019
SL003793	995	0.00132751	0.000711109	0.112902	0.00194423	0.00130994	0.000805086	0.194122	MEK1	MAP2K1	Q02750
SL004327	991	0.00109887	0.000589247	0.113241	0.0022652	0.000746205	0.000666241	0.412705	BAFF	TNFSF13B	Q9Y275
SL001716	988	0.0017805	0.000955881	0.113644	0.00237951	0.00148143	0.00108185	0.292047	IL-12	IL12A IL12B	P29459, P29460
SL002655	996	0.00200177	0.00108335	0.117223	0.00192455	0.00207946	0.00122678	0.174196	CTGF	CTGF	P29279
SL009328	993	0.00143934	0.000779046	0.117223	0.00188377	0.00145938	0.000882612	0.185821	CSH	CSH1 CSH2	P0DML2 P0DML3
SL000530	991	0.000987372	0.000534618	0.117243	0.00231203	0.000874744	0.000604815	0.258132	OSM	OSM	P13725
SL011405	997	-0.00333805	0.00180997	0.117762	0.00179615	-0.00241738	0.00204848	0.381725	PDE5A	PDE5A	O76074
SL007242	996	0.00179509	0.0009793	0.12057	0.00172579	0.00180253	0.00110819	0.194122	MP2K3	MAP2K3	P46734
SL005204	991	0.00214409	0.00117024	0.120636	0.00223556	0.00200417	0.00132374	0.233573	NKG2D	KLRK1	P26718
SL004737	989	-0.00148096	0.000810597	0.121861	0.00223616	-0.00162508	0.000918381	0.152017	Tropomyosin 1 alpha chain	TPM1	P09493
SL005256	986	0.00211792	0.00116058	0.122266	0.0022425	0.00122317	0.00131085	0.514237	Histone H1.2	HIST1H1C	P16403
SL004080	990	0.000962353	0.000527627	0.122271	0.00221907	0.00118265	0.000596079	0.101702	BMPR1A	BMPR1A	P36894
SL000597	989	0.00131078	0.000718779	0.122271	0.00216033	0.000707305	0.000812572	0.54877	TNF-b	LTA	P01374
SL004868	987	-0.00120087	0.000662977	0.125458	0.00217234	-0.0010965	0.000749736	0.252348	Carbonic anhydrase VII	CA7	P43166
SL018938	997	0.00257027	0.00142016	0.125603	0.00161028	0.00301923	0.00160775	0.12532	SUMO3	SUMO3	P55854
SL003915	993	0.00105834	0.000584864	0.125603	0.0022395	0.000129574	0.000658618	0.913756	kallikrein 8	KLK8	O60259
SL003320	996	0.00140361	0.000778236	0.127084	0.00215222	0.00111939	0.000880449	0.339641	VEGF-D	FIGF	O43915
SL009045	996	0.00227335	0.00127179	0.131443	0.00219917	0.00160604	0.00143846	0.414063	ENPP7	ENPP7	Q6UWV6
SL001753	984	0.00127622	0.000717511	0.133823	0.00209819	0.00151756	0.000811256	0.127002	Sialoadhesin	SIGLEC1	Q9BZZ2
SL007869	987	-0.00121187	0.000682943	0.134859	0.00195009	-0.00180265	0.000770218	0.0465212	PPIB	PPIB	P23284
SL010521	997	-0.00378351	0.00213297	0.134864	0.00156233	-0.00269286	0.00241402	0.414229	BTK	BTK	Q06187
SL003658	997	-0.0035941	0.00203013	0.135691	0.00146749	-0.00236628	0.00229721	0.458723	Aflatoxin B1 aldehyde reductase	AKR7A2	O43488
SL005219	997	0.00749396	0.00424859	0.137426	0.00212203	0.00634384	0.00481003	0.316416	Siglec-9	SIGLEC9	Q9Y336
SL006448	993	0.000960596	0.000545654	0.138078	0.00210486	0.001213	0.000616733	0.105024	HRG	HRG	P04196
SL003680	997	-0.00188337	0.00106984	0.138078	0.00203563	-0.00177726	0.00121135	0.251522	sRAGE	AGER	Q15109
SL003930	991	0.00123254	0.000701547	0.13895	0.00187978	0.000946058	0.000794599	0.376205	HPG-	HPGD	P15428
SL000049	995	0.00074776	0.00042883	0.142739	0.0019957	0.00113092	0.000484373	0.0469798	Protein S	PROS1	P07225
SL003186	992	0.00137396	0.000791937	0.145249	0.00184098	0.000950719	0.000895469	0.440211	Lymphotactin	XCL1	P47992
SL004489	981	0.00140014	0.00080741	0.145315	0.00203294	0.000950977	0.000913621	0.451616	TLR4	TLR4	O00206
SL017290	992	-0.00097521	0.000565229	0.147853	0.00169466	-0.00114124	0.000640033	0.14941	PolyUbiquitin K63	UBC	P0CG48
SL013570	989	0.000811292	0.000470999	0.148551	0.00183716	0.000453239	0.000532495	0.56086	DYRK3	DYRK3	O43781
SL004910	997	-0.0015791	0.000924122	0.152727	0.00138048	-0.000651042	0.00104449	0.682126	aldolase A	ALDOA	P04075
SL004060	993	0.000753018	0.000441871	0.154012	0.00186015	0.00120602	0.000498847	0.0390111	Endothelin-converting enzyme 1	ECE1	P42892
SL004855	993	0.000668648	0.000394152	0.15633	0.00171884	0.00125831	0.000443997	0.0130652	contactin-1	CNTN1	Q12860
SL003043	997	0.00291946	0.00172304	0.156795	0.00172958	0.00440241	0.0019484	0.0559168	TIMP-3	TIMP3	P35625
SL000668	996	-0.00169185	0.00100832	0.162079	0.001458	-0.000943037	0.00114081	0.573215	CD36 ANTIGEN	CD36	P16671
SL003168	995	0.00102975	0.000614122	0.162239	0.00165622	0.000768963	0.000695172	0.418517	CTACK	CCL27	Q9Y4X3
SL004827	992	0.00140389	0.000838671	0.162985	0.00152585	0.00140583	0.00094815	0.245772	S100A6	S100A6	P06703
SL017328	994	0.00212955	0.00127287	0.163045	0.00173968	0.00284447	0.00144	0.103459	MYPC1	MYBPC1	Q00872
SL000570	987	0.00124917	0.00074689	0.163045	0.00173392	0.000747274	0.000845433	0.541166	Secretin	SCT	P09683
SL003170	990	0.00147425	0.000886257	0.165916	0.00166344	0.000810644	0.00100048	0.582229	Eotaxin-3	CCL26	Q9Y258
SL005161	989	-0.000995612	0.000599477	0.16661	0.00154686	-0.00105839	0.000678513	0.216734	FGF-12	FGF12	P61328
SL000442	989	0.00178768	0.00107988	0.168242	0.00172633	0.000932939	0.00122133	0.607363	HGH	GH1	P01241
SL007560	994	0.00126286	0.000763334	0.168382	0.00139384	0.00150053	0.000863516	0.161064	STAB2	STAB2	Q8WWQ8
SL002650	997	-0.0030598	0.00185365	0.169451	0.00119447	-0.00166019	0.00209674	0.592035	M2-PK	PKM2	P14618
SL008760	990	-0.001234	0.000750562	0.171543	0.00150923	-0.00157209	0.000848114	0.131294	SLIK1	SLITRK1	Q96PX8
SL004591	988	-0.00144642	0.000880145	0.171573	0.00153325	-0.00157964	0.000994446	0.206441	G-CSF-R	CSF3R	Q99062
SL005234	995	0.0019324	0.00118046	0.173611	0.00155488	0.00223533	0.00133726	0.180551	GDF-9	GDF9	O60383
SL005164	985	0.00123228	0.000758673	0.177959	0.00158241	0.000591656	0.000857563	0.646494	Galectin-2	LGALS2	P05162
SL005167	989	-0.00101539	0.000628511	0.180902	0.00137538	-0.00104762	0.00071163	0.249779	Galectin-8	LGALS8	O00214
SL000313	977	0.00192879	0.00120207	0.184746	0.00159691	0.00211225	0.00135945	0.219078	C3a	C3	P01024
SL000515	989	0.0010195	0.000635662	0.184766	0.00144837	0.000877238	0.00071778	0.364121	MCP-2	CCL8	P80075
SL001945	997	-0.00120895	0.000756228	0.186287	0.00156395	-0.00156728	0.00085593	0.136348	sE-Selectin	SELE	P16581
SL000300	989	-0.00110649	0.00069221	0.186287	0.00152036	-0.000739154	0.000782874	0.507071	b-Endorphin	POMC	P01189
SL005236	992	0.0010635	0.000665794	0.186475	0.00140176	0.000690427	0.000751566	0.522883	NovH	NOV	P48745
SL004349	987	-0.00121771	0.000766451	0.189477	0.00147655	-0.00127086	0.000867104	0.251529	IFN-lambda 2	IFNL2	Q8IZJ0
SL002922	996	0.00155505	0.000983558	0.192182	0.00150615	0.000791409	0.00111179	0.636792	sICAM-1	ICAM1	P05362
SL004856	989	0.00084389	0.000534934	0.19328	0.00139717	0.000559531	0.000605067	0.519416	Desmoglein-1	DSG1	Q02413
SL004875	992	0.000822869	0.00052337	0.195087	0.00132987	0.00108251	0.000591625	0.136549	IL-1Rrp2	IL1RL2	Q9HB29
SL001721	993	0.000919571	0.00058664	0.19668	0.00129613	0.000908713	0.000663727	0.292047	PECAM-1	PECAM1	P16284
SL003187	994	0.00119427	0.000762945	0.197282	0.00135935	0.00062516	0.000863068	0.630031	MDC	CCL22	O00626
SL003461	993	0.00137718	0.000886809	0.201928	0.00132986	0.000856501	0.00100328	0.559473	ACTH	POMC	P01189
SL008466	992	0.0015447	0.000996141	0.202578	0.00118845	0.00187267	0.00112713	0.183579	3HAO	HAAO	P46952
SL004768	994	0.001198	0.000781512	0.209479	0.00106902	0.00139193	0.00088483	0.212013	AIF1	AIF1	P55008
SL000493	996	0.00140203	0.000914946	0.209479	0.00103223	0.00232719	0.00103422	0.0569996	LDH-H 1	LDHB	P07195
SL010459	997	0.00578783	0.00379797	0.212693	0.00132784	0.00420881	0.0042991	0.487635	FCG2A	FCGR2A	P12318
SL000299	986	-0.00078285	0.000514014	0.212807	0.00128492	-0.00079041	0.000580986	0.295767	b-ECGF	FGF1	P05230
SL003687	994	0.00121541	0.000803561	0.21692	0.00101388	0.00144973	0.00091003	0.20541	Nucleoside diphosphate kinase A	NME1	P15531
SL006372	997	0.00178727	0.00118484	0.218366	0.000934722	0.00196716	0.00134154	0.251522	YES	YES1	P07947
SL014488	997	-0.0024429	0.00163091	0.222596	0.000904938	-0.00195895	0.00184638	0.440211	VAV	VAV1	P15498
SL003309	993	0.000533967	0.0003572	0.223613	0.00122839	0.000445474	0.000403899	0.41968	LBP	LBP	P18428
SL007250	995	0.00106419	0.000712289	0.223682	0.001113	0.00108048	0.000805962	0.305919	PK3CG	PIK3CG	P48736
SL016549	997	-0.00225197	0.0015117	0.225281	0.00091883	-0.0012031	0.00171022	0.638184	AMPK a2b2g1	PRKAA2 PRKAB2 PRKAG1	P54646 O43741 P54619
SL009431	996	0.00170947	0.00115099	0.226941	0.00096706	0.00194279	0.00130235	0.24219	HINT1	HINT1	P49773
SL004919	997	0.00192896	0.00130242	0.22847	0.000953156	0.00208896	0.00147469	0.27042	Peroxiredoxin-1	PRDX1	Q06830
SL002086	993	-0.00288444	0.00195037	0.22912	0.00119128	-0.000977187	0.00220358	0.786306	Ficolin-3	FCN3	O75636
SL004782	992	0.000752674	0.000511038	0.231513	0.00117661	0.000742421	0.000578293	0.334055	TSG-6	TNFAIP6	P98066
SL004866	994	0.00173471	0.00117852	0.231614	0.00112926	0.00170924	0.00133365	0.334908	Carbonic anhydrase I	CA1	P00915
SL008916	989	-0.000900939	0.000613603	0.23295	0.00103462	-0.000910898	0.000695871	0.321191	DPP2	DPP7	Q9UHL4
SL004920	997	0.00141533	0.000965545	0.233738	0.00090584	0.00189494	0.0010928	0.161847	Cofilin-1	CFL1	P23528
SL006914	989	-0.00161603	0.00110412	0.234429	0.00111521	-0.00244189	0.00124898	0.107056	Glucocorticoid receptor	NR3C1	P04150
SL010616	997	0.00201113	0.00137688	0.235469	0.000865272	0.00251608	0.00155867	0.198763	SHP-2	PTPN11	Q06124
SL004851	990	0.00117475	0.000806253	0.236728	0.000997671	0.00104622	0.000912883	0.397472	ALK-1	ACVRL1	P37023
SL006992	992	0.000833986	0.000572588	0.236728	0.00106986	0.000626237	0.000647927	0.494379	MATN3	MATN3	O15232
SL006088	997	-0.0028525	0.00196363	0.238163	0.000794778	-0.00165973	0.00222195	0.616325	Sphingosine kinase 1	SPHK1	Q9NYA1
SL004015	993	-0.000511779	0.000353687	0.240439	0.00109711	-0.000222532	0.000399596	0.722928	TAFI	CPB2	Q96IY4
SL000590	992	-0.000495006	0.000343131	0.242127	0.00100229	-0.000109402	0.000387331	0.867901	Thyroxine-Binding Globulin	SERPINA7	P05543
SL008759	997	0.00196531	0.00136397	0.242388	0.00080381	0.00219942	0.00154433	0.267295	GPVI	GP6	Q9HCN6
SL005675	993	0.00136502	0.000947451	0.242388	0.000895485	0.000817377	0.00107062	0.607363	ATP synthase beta chain	ATP5B	P06576
SL004860	996	0.00129805	0.000901856	0.242734	0.000789627	0.00112394	0.00102081	0.420463	HTRA2	HTRA2	O43464
SL007059	994	0.000810526	0.000568415	0.248594	0.000836076	0.000840505	0.000643323	0.322199	LY86	LY86	O95711
SL005181	990	0.000977182	0.000686256	0.249223	0.000965382	0.000348553	0.000775603	0.784014	IL-20 Ra	IL20RA	Q9UHF4
SL011211	997	-0.00279998	0.00196888	0.249756	0.000774931	-0.00188686	0.0022285	0.563768	IF4G2	EIF4G2	P78344
SL014229	987	0.00114138	0.000804954	0.251405	0.00101942	0.000450552	0.000911342	0.764533	CD83	CD83	Q01151
SL002541	982	0.000790046	0.000557699	0.251719	0.00101331	0.000399549	0.000628999	0.674156	sRANKL	TNFSF11	O14788
SL008023	987	0.00102088	0.000721221	0.251934	0.00096585	0.000647681	0.000814896	0.591471	HPLN1	HAPLN1	P10915
SL007266	995	0.00136503	0.00096874	0.25464	0.000807736	0.00206621	0.00109591	0.123421	PSD7	PSMD7	P51665
SL001795	993	-0.00133897	0.000953475	0.25659	0.000863954	-0.00190908	0.00107842	0.151998	IL-1b	IL1B	P01584
SL018921	997	0.00162206	0.00116579	0.262445	0.000649683	0.00193585	0.00131985	0.251522	HEMK2	N6AMT1	Q9Y5N5
SL013989	992	0.00108333	0.000778943	0.262445	0.00079915	0.00105277	0.000881618	0.376205	RSPO2	RSPO2	Q6UXX9
SL000057	986	0.000721325	0.000520044	0.26393	0.000897353	0.000891497	0.000587415	0.23235	Thymidine kinase	TK1	P04183
SL007122	996	0.00142355	0.00102757	0.264421	0.000774129	0.00102708	0.00116275	0.541166	IDE	IDE	P14735
SL004438	996	-0.00095691	0.000693119	0.266313	0.000784693	-0.00222253	0.000779608	0.01248	Cystatin M	CST6	Q15828
SL005261	985	0.000797389	0.000577752	0.266313	0.000863245	0.000712663	0.00065369	0.42609	TCPTP	PTPN2	P17706
SL000358	993	0.000811622	0.00058911	0.26718	0.000885703	0.000765278	0.000666453	0.39685	Coagulation Factor VII	F7	P08709
SL004066	990	-0.00110732	0.000804319	0.267342	0.000870781	-0.000876043	0.000909202	0.49547	GIIE	PLA2G2E	Q9NZK7
SL007281	996	0.00149561	0.00109555	0.272699	0.000656137	0.00148123	0.00124329	0.376205	MK12	MAPK12	P53778
SL007049	984	0.00168682	0.00124823	0.27929	0.000812902	0.00104939	0.00141224	0.617597	CYTF	CST7	O76096
SL008933	987	0.00118233	0.000878093	0.281427	0.000812925	0.000406696	0.00099216	0.801953	PARK7	PARK7	Q99497
SL010376	989	-0.00110437	0.000822669	0.283142	0.00072724	-0.00120425	0.000931216	0.329013	MMEL2	MMEL1	Q495T6
SL000134	995	0.000476505	0.000355622	0.284055	0.00077785	0.0010574	0.000400449	0.0221435	Met	MET	P08581
SL004326	991	0.000582925	0.000435326	0.284055	0.000754653	0.000481787	0.000492268	0.487635	TNFSF18	TNFSF18	Q9UNG2
SL004119	986	0.000725483	0.000541958	0.284055	0.00073639	0.000539355	0.000613002	0.543099	discoidin domain receptor 1	DDR1	Q08345
SL011498	988	-0.000920156	0.000687963	0.284285	0.000775936	-0.00140776	0.000777609	0.141631	PACAP-38	ADCYAP1	P18509
SL014093	995	0.000952695	0.0007146	0.286147	0.000685401	0.000693737	0.000808297	0.557015	ENTP3	ENTPD3	O75355
SL008522	990	0.000811854	0.000609257	0.286147	0.000764259	0.00110621	0.00069028	0.202948	SEM5A	SEMA5A	Q13591
SL000615	996	0.00138027	0.00103842	0.287184	0.000616706	0.00145665	0.0011757	0.356499	Vasoactive Intestinal Peptide	VIP	P01282
SL014148	989	-0.000990107	0.000744904	0.287184	0.000734398	-0.0013232	0.000843432	0.213205	ROBO3	ROBO3	Q96MS0
SL004669	994	-0.000769747	0.000582767	0.290928	0.000747307	0.000296881	0.000655243	0.781996	Apo E4	APOE	P02649
SL003653	996	0.001137	0.000860982	0.290928	0.000638338	0.0011359	0.000975677	0.38905	phosphoglycerate kinase 1	PGK1	P00558
SL002036	987	-0.00149624	0.00114301	0.296615	0.000701736	-0.00215453	0.00129341	0.182212	FGFR4	FGFR4	P22455
SL007221	997	0.00196776	0.00150702	0.298	0.000511708	0.00249775	0.00170602	0.251929	STAT3	STAT3	P40763
SL014288	989	-0.000671566	0.000516957	0.301172	0.000669311	-0.000559726	0.000584913	0.498668	MO2R1	CD200R1	Q8TD46
SL003440	990	0.000631301	0.000489377	0.305658	0.000650036	0.0010587	0.000553035	0.116662	PAFAH	PLA2G7	Q13093
SL010493	994	0.00127247	0.000987124	0.305768	0.000503826	0.00160876	0.00111753	0.26083	CAMK2D	CAMK2D	Q13557
SL007108	981	0.000939165	0.000728905	0.305768	0.000656421	0.000948949	0.000826783	0.39685	IRF1	IRF1	P10914
SL017424	994	0.00104672	0.000816799	0.309153	0.000510127	0.0012915	0.000925415	0.279658	GI24	C10orf54	Q9H7M9
SL004345	984	0.000728847	0.000570168	0.310522	0.000634055	0.000460243	0.000644122	0.635219	GDF-11	GDF11	O95390
SL005174	991	0.00102447	0.000802678	0.31123	0.000624471	0.00109949	0.000908709	0.37034	IL-17B R	IL17RB	Q9NRM6
SL004649	990	0.00105973	0.000833903	0.313863	0.000601027	0.00102221	0.000944471	0.429634	OX40 Ligand	TNFSF4	P23510
SL004133	984	0.00079116	0.000628517	0.320011	0.000569596	0.000648126	0.000710927	0.524703	BMP RII	BMPR2	Q13873
SL019978	987	0.00105577	0.000839052	0.320011	0.000579339	0.000711836	0.000948702	0.614232	IFNA7	IFNA7	P01567
SL006993	988	-0.000985102	0.000784697	0.321242	0.000557149	-0.001056	0.000887189	0.376205	MK13	MAPK13	O15264
SL004366	987	0.00128873	0.00102795	0.321531	0.000567464	0.0007118	0.00116223	0.688588	TWEAKR	TNFRSF12A	Q9NP84
SL004752	992	0.000633608	0.000505468	0.321531	0.000517547	0.000619409	0.000571757	0.429439	DRR1	FAM107A	O95990
SL002081	993	0.00050484	0.000403184	0.32154	0.000566814	0.000707226	0.000455564	0.219342	Cadherin-5	CDH5	P33151
SL004360	984	-0.000805995	0.000643695	0.32154	0.000564474	-0.00116451	0.000728126	0.20341	Neurotrophin-5	NTF4	P34130
SL003524	997	-0.00140805	0.00112916	0.324024	0.00040271	-0.000799014	0.00127788	0.681157	Protein disulfide isomerase A3	PDIA3	P30101
SL000582	991	-0.000591007	0.000477054	0.3282	0.000487365	-0.000757418	0.000539596	0.276601	Survivin	BIRC5	O15392
SL004296	997	-0.00177096	0.00143535	0.330667	0.0004007	-0.000954954	0.00162431	0.7032	Myokinase, human	AK1	P00568
SL007217	989	-0.000881873	0.000716051	0.33155	0.000492975	-0.00135663	0.000809736	0.179646	INGR2	IFNGR2	P38484
SL004156	988	-0.00113634	0.000925918	0.33362	0.000485463	-0.00122498	0.00104787	0.38717	TRAIL R1	TNFRSF10A	O00220
SL000130	989	0.000975335	0.000798861	0.33678	0.000471213	0.00059232	0.000903537	0.663798	Cyclin B1	CCNB1	P14635
SL000655	992	0.00105291	0.000862793	0.33678	0.000414509	0.001026	0.000976793	0.445495	Keratin 18	KRT18	P05783
SL000674	996	0.00102233	0.000841529	0.339547	0.000387494	0.00137026	0.00095199	0.26083	FST	FST	P19883
SL014071	996	0.0011152	0.000919052	0.33996	0.000360117	0.00134619	0.00104052	0.329013	FLRT1	FLRT1	Q9NZU1
SL000584	995	0.00132885	0.00109572	0.33996	0.000388976	0.00126971	0.00124091	0.461993	TGF-b1	TGFB1	P01137
SL011202	997	-0.00206457	0.00170544	0.340827	0.000340052	-0.00085385	0.00192932	0.786306	SNAA	NAPA	P54920
SL008611	996	0.00115981	0.000962604	0.343475	0.000454545	0.00202723	0.00108805	0.128935	ASAHL	NAAA	Q02083
SL005189	991	-0.000903334	0.000749879	0.343475	0.000445426	-0.00112632	0.000849093	0.312548	IL-7 Ra	IL7R	P16871
SL000524	991	0.000717851	0.000602025	0.35015	0.000414736	0.00134009	0.000679665	0.104175	MMP-3	MMP3	P08254
SL000461	997	-0.00351833	0.00295204	0.35015	0.000410174	-0.0039835	0.00334244	0.376205	IgE	IGHE IGK@ IGL@	P01854
SL004864	992	0.0012392	0.00104508	0.353332	0.000343877	0.000489504	0.00118342	0.800126	Cadherin-12	CDH12	P55289
SL008331	997	-0.00197981	0.00167436	0.354886	0.00029147	-0.00112215	0.00189498	0.701508	PA2G4	PA2G4	Q9UQ80
SL010509	997	0.00261307	0.00224059	0.364156	0.000269234	0.00295823	0.00253691	0.388331	PAK6	PAK6	Q9NQU5
SL003951	997	0.00138756	0.00119963	0.36955	0.000301728	0.00185702	0.00135797	0.292519	BDNF	BDNF	P23560
SL011071	987	0.00123016	0.00107926	0.37907	0.000301343	0.000778508	0.00121975	0.674156	PDGF-CC	PDGFC	Q9NRA1
SL007806	986	0.00102363	0.000898093	0.37907	0.00028225	0.000840678	0.00101721	0.573215	IL22RA1	IL22RA1	Q8N6P7
SL010515	997	-0.00181807	0.00159638	0.379193	0.000240917	-0.00117547	0.00180705	0.666037	RPS6KA3	RPS6KA3	P51812
SL004914	997	0.00141624	0.00124487	0.379511	0.000237999	0.00144703	0.00140956	0.46013	PPase	PPA1	Q15181
SL000337	997	-0.00159528	0.0014098	0.382784	0.000204416	-0.000531937	0.00159469	0.841635	Calpain I	CAPN1 CAPNS1	P07384 P04632
SL004297	983	0.000917098	0.000810866	0.382784	0.000274107	-0.00018157	0.000915168	0.913706	NEUREGULIN-1	NRG1	Q02297
SL003738	988	-0.000627121	0.000554859	0.382829	0.000261564	-0.00095072	0.00062637	0.23235	B7	CD80	P33681
SL004515	991	-0.00140052	0.00126695	0.398053	0.000224871	-0.00234159	0.00143269	0.192693	PGRP-S	PGLYRP1	O75594
SL005685	997	0.00143112	0.00129899	0.399664	0.000172794	0.0011822	0.00147075	0.586147	EF-1-beta	EEF1B2	P24534
SL014294	988	0.000826968	0.000750764	0.399664	0.000208063	0.000586797	0.000848758	0.646494	EPHAA	EPHA10	Q5JZY3
SL013969	995	0.000959196	0.00087172	0.399947	0.000173528	0.000924751	0.000986463	0.511542	KYNU	KYNU	Q16719
SL000104	994	0.00114347	0.00104217	0.401517	0.000158097	0.00107863	0.00117916	0.523335	Bcl-2	BCL2	P10415
SL003655	997	-0.00150509	0.00137264	0.401517	0.000147056	-0.000706013	0.00155329	0.781742	Transketolase	TKT	P29401
SL014088	991	0.00083568	0.0007628	0.401675	0.000196327	0.000802142	0.000863735	0.517	FCRL3	FCRL3	Q96P31
SL008071	996	0.000905758	0.000827972	0.402245	0.000150112	0.00095241	0.000937565	0.466729	14-3-3 protein theta	YWHAQ	P27348
SL014130	989	-0.000730044	0.000670576	0.405187	0.000179274	-0.0013331	0.000758073	0.154955	CHST6	CHST6	Q9GZX3
SL003362	994	0.000501323	0.000463218	0.408887	0.000171066	0.000280111	0.000523975	0.736929	C3d	C3	P01024
SL018947	990	0.000893406	0.000827607	0.410219	0.000159072	0.000594825	0.000935904	0.674156	UBP25	USP25	Q9UHP3
SL019100	997	0.00171855	0.00159342	0.410391	0.000125474	0.00215191	0.00180398	0.376205	CHIP	STUB1	Q9UNE7
SL007295	989	-0.000493602	0.000460959	0.41497	0.000130759	-0.000798108	0.000520764	0.227454	CAD15	CDH15	P55291
SL000074	986	0.000613323	0.000582297	0.426097	9.83069e-05	0.000301365	0.000659618	0.780432	p53	TP53	P04637
SL003848	983	-0.000813264	0.000776349	0.429129	9.67064e-05	-0.000636167	0.000877046	0.630031	Annexin V	ANXA5	P08758
SL004812	997	-0.00166677	0.00159147	0.429129	6.98402e-05	-0.000747821	0.00180094	0.799776	Triosephosphate isomerase	TPI1	P60174
SL011508	988	0.00139815	0.0013382	0.429858	9.28203e-05	0.00132903	0.00151148	0.543099	PACAP-27	ADCYAP1	P18509
SL006132	991	0.000890428	0.000852434	0.429858	7.56083e-05	0.00107787	0.000965273	0.414063	Lamin-B1	LMNB1	P20700
SL008709	988	-0.000774944	0.000742226	0.429858	8.96667e-05	-0.00124176	0.000839448	0.247067	DSC3	DSC3	Q14574
SL010455	994	0.000555155	0.000534122	0.432531	7.51434e-05	0.0012385	0.000602143	0.0876806	Contactin-5	CNTN5	O94779
SL000587	991	-0.000705471	0.000680928	0.434296	6.74752e-05	-0.000646975	0.000770235	0.566168	Thyroglobulin	TG	P01266
SL001737	994	0.000752886	0.000729656	0.436651	5.31225e-05	0.000209273	0.000826057	0.885098	STRATIFIN	SFN	P31947
SL006916	991	-0.000891462	0.000865466	0.437081	5.66622e-05	-0.000747054	0.000980416	0.607936	LCK	LCK	P06239
SL005588	997	-0.00171551	0.00166592	0.437081	4.48281e-05	-0.00108751	0.00188584	0.710002	FER	FER	P16591
SL011772	989	0.00101902	0.00099182	0.438184	5.2017e-05	0.000683625	0.00112219	0.690651	PESC	PES1	O00541
SL007136	990	0.000700464	0.000683102	0.43906	4.9094e-05	0.000286527	0.000772759	0.822295	CEBPB	CEBPB	P17676
SL000527	996	0.00108201	0.00106071	0.442197	4.06872e-05	0.000420704	0.00120044	0.831529	MMP-9	MMP9	P14780
SL017189	994	0.000552315	0.000541961	0.442373	3.88006e-05	0.000476679	0.000613086	0.599153	Kininogen, HMW	KNG1	P01042
SL010512	992	-0.000922706	0.00090859	0.444316	2.74044e-05	-0.000723669	0.00102934	0.638184	PIK3CA/PIK3R1	PIK3CA PIK3R1	P42336 P27986
SL004299	986	-0.000720351	0.000711843	0.446277	2.18822e-05	-0.000599305	0.000804586	0.616772	Livin B	BIRC7	Q96CA5
SL006268	997	-0.00147202	0.00145779	0.447283	1.68797e-05	-0.00158102	0.00165064	0.498569	NSF1C	NSFL1C	Q9UNZ2
SL007356	984	0.000919859	0.000913366	0.448611	1.40886e-05	0.000740146	0.00103417	0.634912	NOTC2	NOTCH2	Q04721
SL006528	989	0.000475343	0.000472433	0.44862	1.25405e-05	0.00116965	0.000531858	0.0639079	SEPR	FAP	Q12884
SL005226	996	0.000937097	0.000931829	0.44862	9.07575e-06	0.00113182	0.00105439	0.43418	TSLP R	CRLF2	Q9HC73
SL004536	990	0.00215713	0.00216045	0.453073	-3.10788e-06	0.00568939	0.00243147	0.0465212	LEAP-1	HAMP	P81172
SL016548	988	0.000874712	0.000879381	0.455181	-1.01554e-05	0.000649633	0.000994355	0.664894	AMPK a1b1g1	PRKAA1 PRKAB1 PRKAG1	Q13131 Q9Y478 P54619
SL003792	995	-0.00157763	0.00158853	0.455754	-1.02899e-05	-0.0014716	0.00179806	0.578802	GRB2 adapter protein	GRB2	P62993
SL010528	997	0.00148961	0.00150351	0.456906	-1.41281e-05	0.00181827	0.00170228	0.436801	UFM1	UFM1	P61960
SL008113	997	-0.00191893	0.00195119	0.46147	-2.36405e-05	-0.00106346	0.00220857	0.77137	ATPO	ATP5O	P48047
SL011588	989	0.000979867	0.000998474	0.462434	-3.43931e-05	0.000156267	0.00112919	0.934495	RS3A	RPS3A	P61247
SL004757	997	-0.00175199	0.00178786	0.462923	-2.84958e-05	-0.000825312	0.00202341	0.802497	DRG-1	VTA1	Q9NP79
SL000414	991	0.000358118	0.000367023	0.465356	-4.76387e-05	0.000660216	0.000414243	0.205398	Factor B	CFB	P00751
SL002705	997	0.00194146	0.00199279	0.465896	-4.9683e-05	0.00214505	0.00225639	0.502777	Thrombospondin-1	THBS1	P07996
SL014188	987	0.000741613	0.000761941	0.466039	-4.94696e-05	5.35206e-05	0.000862563	0.974337	CD244	CD244	Q9BZW8
SL005308	990	0.00103558	0.00106918	0.468861	-5.68265e-05	0.000485645	0.00120887	0.806346	PSME3	PSME3	P61289
SL006523	995	-0.000647952	0.000670005	0.469397	-5.2045e-05	-0.000845752	0.000758761	0.414307	MFGM	MFGE8	Q08431
SL010374	997	-0.00144319	0.00149371	0.469523	-4.67305e-05	-0.000705289	0.00169058	0.799776	METAP1	METAP1	P53582
SL000455	989	-0.000557307	0.000577257	0.469541	-6.37134e-05	-0.0011665	0.000652006	0.14793	c-Jun	JUN	P05412
SL013488	997	-0.00136144	0.00141125	0.469545	-5.29743e-05	-0.00135161	0.00159795	0.56383	CLC1B	CLEC1B	Q9P126
SL014028	993	0.000466553	0.000486615	0.473216	-8.09912e-05	0.000986803	0.000549719	0.146222	ENTP5	ENTPD5	O75356
SL005630	997	0.00123002	0.00128566	0.474148	-6.64844e-05	0.00185377	0.00145513	0.338558	PSA6	PSMA6	P60900
SL006923	984	-0.000590862	0.000618486	0.474625	-8.04348e-05	-0.000975722	0.000698936	0.279658	TBP	TBP	P20226
SL006189	996	0.00123723	0.00130416	0.478823	-8.07544e-05	0.000904532	0.00147694	0.688588	KIF23	KIF23	Q02241
SL010469	993	-0.000491586	0.000520945	0.481889	-0.000108699	-0.000958194	0.000588799	0.194122	RGM-C	HFE2	Q6ZVN8
SL010348	995	0.000418538	0.000445825	0.484833	-0.00011924	0.00100677	0.000503065	0.0979729	FN1.4	FN1	P02751
SL000324	990	-0.000441478	0.000472189	0.487058	-0.000125624	-0.000636571	0.000533945	0.376205	C8	C8A C8B C8G	P07357,P07358,P07360
SL004644	988	0.000432468	0.000463359	0.487704	-0.000126541	0.000633021	0.000525045	0.372576	EDA	EDA	Q92838
SL017128	990	0.00046715	0.000502068	0.489251	-0.000120607	0.000522495	0.000568283	0.522878	LRRK2	LRRK2	Q5S007
SL006912	987	0.000943751	0.00102533	0.495946	-0.000149078	0.000213886	0.00115977	0.914641	FGR	FGR	P09769
SL000347	990	-0.000674582	0.000740862	0.502613	-0.000151203	-0.001002	0.000838461	0.376205	CBG	SERPINA6	P08185
SL010466	992	0.000982481	0.00108129	0.50348	-0.000151354	0.000842337	0.00122406	0.647234	MFRP	MFRP	Q9BY79
SL000131	989	-0.000797601	0.000878783	0.503673	-0.000169002	-0.000835175	0.000994516	0.566168	PCNA	PCNA	P12004
SL005372	997	-0.00159157	0.00175774	0.50471	-0.000132702	-0.00059452	0.00198913	0.858089	Sorting nexin 4	SNX4	O95219
SL007680	994	0.000311966	0.000346223	0.507401	-0.000176922	0.00033589	0.000391665	0.557015	ROBO2	ROBO2	Q9HCK4
SL007373	997	-0.00201985	0.002248	0.508727	-0.000137632	-0.00153509	0.00254519	0.694406	PPID	PPID	Q08752
SL011529	997	-0.00166583	0.00185883	0.509905	-0.000143132	-0.000149571	0.00210223	0.970906	SBDS	SBDS	Q9Y3A5
SL010973	992	0.000725304	0.000812896	0.512255	-0.000175493	0.00102369	0.000920139	0.415222	PSA1	PSMA1	P25786
SL000456	996	-0.000442725	0.000499556	0.516147	-0.000209042	-0.000338947	0.000565259	0.696687	iC3b	C3	P01024
SL004610	987	-0.000425001	0.000488011	0.527029	-0.000235536	-0.000395979	0.000552713	0.634912	LRP8	LRP8	Q14114
SL007145	994	0.000764966	0.000879831	0.527548	-0.000233898	0.000716568	0.000995701	0.632934	NR1D1	NR1D1	P20393
SL004271	988	-0.000769468	0.000893021	0.532851	-0.000239335	-0.000658578	0.00100907	0.664894	GFAP	GFAP	P14136
SL008008	986	0.000845924	0.000988868	0.536971	-0.00027118	0.000939486	0.00111665	0.566168	ARGI1	ARG1	P05089
SL003849	989	-0.000563211	0.000660255	0.538241	-0.000268783	-1.17436e-06	0.000746051	0.99908	FGF9	FGF9	P31371
SL000318	994	-0.000876651	0.00103028	0.539289	-0.000266563	-0.000556413	0.00116675	0.771627	C4b	C4A C4B	P0C0L4 P0C0L5
SL005227	989	0.000935632	0.00110057	0.539295	-0.000271804	0.000337446	0.00124525	0.874366	ULBP-1	ULBP1	Q9BZM6
SL011180	983	0.000600057	0.000707521	0.539927	-0.000266242	1.53252e-05	0.000799176	0.995615	HXK1	HK1	P19367
SL000142	987	0.000675042	0.000796216	0.539927	-0.000284654	-0.0002481	0.00089907	0.87251	TS	TYMS	P04818
SL006803	992	0.000645125	0.000764813	0.542626	-0.000259982	0.00076713	0.000866063	0.540467	ANGL3	ANGPTL3	Q9Y5C1
SL004469	997	0.00119735	0.00143041	0.546957	-0.000272504	0.00194018	0.00161887	0.376162	amyloid precursor protein	APP	P05067
SL000481	985	-0.000503323	0.000602141	0.54729	-0.000301004	-0.000781867	0.000681055	0.39685	IL-5	IL5	P05113
SL011509	995	0.000541587	0.000654957	0.553119	-0.000315423	-0.0007934	0.000736441	0.432013	PYY	PYY	P10082
SL009988	992	0.000674486	0.00081581	0.553119	-0.000298347	0.000652541	0.000923257	0.638184	ADAM12	ADAM12	O43184
SL010372	989	0.000640982	0.000777215	0.553872	-0.000304368	0.000664382	0.000879633	0.61146	Enterokinase	TMPRSS15	P98073
SL002075	988	0.000371192	0.000450484	0.553872	-0.000307621	0.000282321	0.000509062	0.723987	IFN-aA	IFNA2	P01563
SL008808	997	0.000926445	0.00112496	0.553872	-0.000251342	0.00128023	0.00127357	0.473272	SKP1	SKP1	P63208
SL004301	989	-0.000541838	0.000664716	0.559657	-0.00030889	-0.00072416	0.000752519	0.495807	Ku70	XRCC6	P12956
SL000409	997	0.00120891	0.00148552	0.559657	-0.000244801	0.00205452	0.00168108	0.364121	ERK-1	MAPK3	P27361
SL006805	987	-0.000557547	0.000685203	0.559657	-0.000309477	-0.000765471	0.000775045	0.483865	MRCKB	CDC42BPB	Q9Y5S2
SL007003	996	0.00102372	0.00125918	0.559657	-0.000260619	0.00114976	0.00142574	0.584668	DHH	DHH	O43323
SL008102	997	-0.00090178	0.0011122	0.560258	-0.000256509	0.000179263	0.00125721	0.933483	MDHC	MDH1	P40925
SL003862	994	-0.0011281	0.00139146	0.560258	-0.000302005	-0.00119866	0.00157505	0.60807	CD40 ligand, soluble	CD40LG	P29965
SL008085	984	-0.000720197	0.000895031	0.563529	-0.000353978	-0.00170366	0.00101096	0.177058	3HIDH	HIBADH	P31937
SL005703	995	-0.00016663	0.000207358	0.563529	-0.000350692	-0.000158497	0.00023463	0.653122	Notch 1	NOTCH1	P46531
SL014108	983	-0.000531825	0.000661978	0.563529	-0.000355392	-0.000314717	0.000747802	0.798875	LRRT3	LRRTM3	Q86VH5
SL010368	996	0.000588473	0.000732701	0.563529	-0.000334645	0.000617784	0.000829131	0.616772	IDUA	IDUA	P35475
SL008421	994	0.000715476	0.000891614	0.563529	-0.000315088	0.000653427	0.00100924	0.667919	ATS1	ADAMTS1	Q9UHI8
SL005224	995	-0.000690985	0.000861697	0.563529	-0.000305617	-0.000578465	0.000974853	0.701294	Thrombopoietin Receptor	MPL	P40238
SL000009	988	0.000589793	0.000736401	0.563529	-0.000354032	0.000345709	0.000831645	0.799776	ERBB2	ERBB2	P04626
SL016129	989	0.000415264	0.000518763	0.563529	-0.000343253	0.000392059	0.000586977	0.658056	FAM107B	FAM107B	Q9H098
SL017528	985	-0.00070791	0.000885902	0.564034	-0.00036582	-0.000901174	0.00100231	0.532559	RNase H1	RNASEH1	O60930
SL000047	991	-0.000446587	0.000562284	0.567194	-0.000325579	-0.000622982	0.00063469	0.48722	IGF-I	IGF1	P05019
SL003200	993	-0.000318454	0.000402118	0.568387	-0.000357241	-0.000216482	0.000455179	0.771627	sTie-2	TEK	Q02763
SL004009	997	-0.00150601	0.00190824	0.569915	-0.000269326	-0.000404017	0.0021594	0.914641	RAC1	RAC1	P63000
SL010492	994	0.000685567	0.00087276	0.5722	-0.000311622	0.000961112	0.000987701	0.490659	CAMK2B	CAMK2B	Q13554
SL007070	988	-0.000530274	0.000681615	0.577485	-0.000385791	-0.000852189	0.000769972	0.418517	LDLR	LDLR	P01130
SL004849	987	-0.000559447	0.000720378	0.577961	-0.000392205	-0.00127854	0.000812779	0.212013	IL-1 sR9	IL1RAPL2	Q9NP60
SL007828	987	0.000483015	0.000624495	0.579833	-0.000398488	-3.35019e-05	0.000704672	0.982229	NRG4	NRG4	Q8WWG1
SL004815	997	-0.00135705	0.00175804	0.580442	-0.000288346	-0.000363272	0.00198948	0.914641	14-3-3 protein beta/alpha	YWHAB	P31946
SL004750	997	-0.00123416	0.00162782	0.590627	-0.000309503	-0.000214583	0.00184188	0.947728	DEAD-box protein 19B	DDX19B	Q9UMR2
SL004648	994	0.000769368	0.00101757	0.59167	-0.000385804	0.00070615	0.00115218	0.688588	LIGHT	TNFSF14	O43557
SL003193	994	-0.00041999	0.000562455	0.598482	-0.000444489	-0.00105269	0.000636172	0.18561	6Ckine	CCL21	O00585
SL001973	995	0.000401833	0.000542533	0.601793	-0.000390194	0.000431961	0.000613886	0.638184	Mammaglobin 2	SCGB2A1	O75556
SL010449	987	0.000331461	0.000447604	0.601793	-0.000445445	0.000663621	0.000506383	0.320749	Carbonic Anhydrase X	CA10	Q9NS85
SL005157	994	-0.000529495	0.000715293	0.601793	-0.000452409	0.000626825	0.000805176	0.599152	DC-SIGN	CD209	Q9NNX6
SL000398	996	0.000795098	0.00107874	0.603477	-0.000334047	0.00142667	0.00122081	0.38717	Cytochrome P450 3A4	CYP3A4	P08684
SL003919	991	-0.000379729	0.000515512	0.603477	-0.000439052	-0.000699959	0.000583674	0.37616	kallikrein 14	KLK14	Q9P0G3
SL010495	986	-0.000419277	0.000570472	0.604176	-0.000434836	-0.000662591	0.00064432	0.459408	CDK2/cyclin A	CDK2 CCNA2	P24941 P20248
SL002071	989	0.000647629	0.000886305	0.606957	-0.000446346	0.000197168	0.00100317	0.913756	Gastrin-releasing peptide	GRP	P07492
SL000339	990	0.000765434	0.00104939	0.607384	-0.000459693	-0.000424289	0.00118449	0.827422	carbonic anhydrase II	CA2	P00918
SL014048	997	-0.00103999	0.00144339	0.612655	-0.000348526	-0.000691035	0.00163418	0.798271	CONA1	COL23A1	Q86Y22
SL004716	987	0.000443326	0.000615369	0.612655	-0.000467985	0.000262809	0.00069563	0.81897	JNK2	MAPK9	P45984
SL002783	995	0.000476427	0.000661656	0.612655	-0.000399261	0.000594462	0.000748635	0.591471	Cardiotrophin-1	CTF1	Q16619
SL004337	996	0.000852071	0.00118385	0.612655	-0.000482294	0.000907119	0.00133966	0.653098	FGF-19	FGF19	O95750
SL010530	989	-0.000476934	0.000663628	0.612897	-0.000420007	-0.0010702	0.00075034	0.266774	OCAD1	OCIAD1	Q9NX40
SL004329	996	-0.000649116	0.000910281	0.616596	-0.00048448	8.93583e-06	0.00102911	0.997377	BMP-14	GDF5	P43026
SL016567	990	-0.000492101	0.000690645	0.616596	-0.000430938	-0.000240017	0.000780414	0.854367	TAK1-TAB1	MAP3K7 TAB1	O43318 Q15750
SL004668	995	-0.000459307	0.00064633	0.61749	-0.00049988	0.000658102	0.000727135	0.528572	Apo E3	APOE	P02649
SL000537	997	-0.00121193	0.00171274	0.619313	-0.00043755	-0.000247331	0.00193823	0.941168	PDGF-BB	PDGFB	P01127
SL010504	991	0.000796151	0.00113744	0.624846	-0.000486769	0.000472946	0.00128547	0.822368	MAPK5	MAPKAPK5	Q8IW41
SL010498	985	-0.000490136	0.000704892	0.627397	-0.000511865	-0.00106409	0.000797983	0.309469	EPHA3	EPHA3	P29320
SL000021	989	-0.000545819	0.000785072	0.627397	-0.000514251	-0.000862655	0.000889066	0.492155	Insulin	INS	P01308
SL000139	995	-0.000743257	0.00107524	0.630003	-0.000485679	-0.000218178	0.00121646	0.914641	EPI	EREG	O14944
SL006924	992	-0.000341082	0.000498683	0.635276	-0.000535392	-0.00177933	0.000555159	0.00420187	ART	AGRP	O00253
SL000277	993	-0.000231374	0.000339903	0.636912	-0.000538786	0.000241451	0.000383806	0.678611	Apo E2	APOE	P02649
SL006542	993	-0.000355862	0.000523017	0.636912	-0.000538892	-0.000263804	0.000592292	0.786306	FCN2	FCN2	Q15485
SL004248	985	0.000497264	0.000733413	0.638092	-0.000527845	-0.000296512	0.000827161	0.827422	GDNF	GDNF	P39905
SL000563	997	-0.0011348	0.00167523	0.638092	-0.000452365	-3.58775e-05	0.00189539	0.995615	RANTES	CCL5	P13501
SL004932	989	-0.0004972	0.000737014	0.639728	-0.000474374	-0.000304631	0.000833764	0.82383	Peroxiredoxin-5	PRDX5	P30044
SL004365	989	-0.000482295	0.000718666	0.641957	-0.000519676	-0.00100703	0.000813327	0.356541	TWEAK	TNFSF12	O43508
SL011708	997	-0.00101947	0.00152583	0.643734	-0.0003877	-0.000182376	0.00172676	0.953276	ARP19	ARPP19	P56211
SL000276	994	-0.000656663	0.000984419	0.643984	-0.000556969	0.000812187	0.00110913	0.625793	Apo E	APOE	P02649
SL010522	994	0.000590246	0.00088914	0.645974	-0.000438698	0.000921245	0.00100465	0.522987	CDK8/cyclin C	CDK8 CCNC	P49336 P24863
SL000557	993	0.000693232	0.00105178	0.649204	-0.000467171	0.00045101	0.00119115	0.81897	PKC-Z	PRKCZ	Q05513
SL004367	997	0.000886702	0.00135032	0.649767	-0.000508858	0.00116152	0.00152885	0.608482	DKK1	DKK1	O94907
SL004343	983	0.00052119	0.000793955	0.649767	-0.000565029	-6.59684e-05	0.000897104	0.970488	Flt3 ligand	FLT3LG	P49771
SL000554	997	0.000675801	0.00103005	0.649767	-0.000465987	0.000945409	0.00116618	0.582229	PKC-D	PRKCD	Q05655
SL002565	987	0.000655611	0.00100079	0.649941	-0.000555302	0.000471228	0.00113276	0.799776	c-Myc	MYC	P01106
SL000401	989	0.000638483	0.000976253	0.65019	-0.000557972	0.000154745	0.00110476	0.933854	Elastase	ELANE	P08246
SL004353	989	0.0004755	0.000728979	0.650969	-0.00055525	-4.68726e-05	0.000822967	0.976356	IL-17D	IL17D	Q8TAD2
SL011808	997	-0.0012187	0.00187572	0.652422	-0.000446354	-0.000246286	0.00212285	0.947728	CPNE1	CPNE1	Q99829
SL010499	984	-0.000377315	0.000587546	0.657672	-0.000581934	-0.000607398	0.000664385	0.523335	HCK	HCK	P08631
SL011100	990	-0.00054653	0.000851623	0.657672	-0.000518597	-0.00128127	0.000963145	0.310831	CD226	CD226	Q15762
SL002803	996	0.000727442	0.00114039	0.660198	-0.000535228	-5.39804e-05	0.00129064	0.984814	PGP9.5	UCHL1	P09936
SL011628	996	0.000508906	0.000801265	0.661824	-0.000478835	0.000699271	0.000907311	0.603391	DBNL	DBNL	Q9UJU6
SL004475	987	-0.000323625	0.000512454	0.664147	-0.000604197	-0.000846369	0.000579316	0.252742	IFN-a/b R1	IFNAR1	P17181
SL008504	988	-0.000334141	0.000531159	0.665513	-0.000609998	-0.000906175	0.000599476	0.234348	GNS	GNS	P15586
SL010619	983	-0.000369636	0.000589501	0.666555	-0.000608179	-0.000713547	0.000666581	0.435724	TPSG1	TPSG1	Q9NRR2
SL010373	987	0.000508138	0.000817389	0.67016	-0.000601764	0.000399484	0.000924482	0.792446	FCAR	FCAR	P24071
SL011616	989	0.000560776	0.000902985	0.67016	-0.000595622	0.000277762	0.00102177	0.874366	IF4A3	EIF4A3	P38919
SL003974	991	-0.000493164	0.000795036	0.67016	-0.000574457	-0.000477147	0.000899507	0.738051	Activated Protein C	PROC	P04070
SL007953	995	0.000532356	0.000863844	0.672604	-0.000570537	0.000476169	0.000978105	0.770379	PDXK	PDXK	O00764
SL004938	997	0.000723464	0.00117489	0.672604	-0.000489811	0.00134279	0.00132966	0.470467	CaMKK alpha	CAMKK1	Q8N5S9
SL006921	992	-0.000672609	0.00109875	0.674938	-0.000567681	-0.000718676	0.00124415	0.710002	PDK1	PDK1	Q15118
SL000532	997	-0.000859564	0.00141322	0.677535	-0.000584811	-0.000114381	0.00159939	0.970906	ON	SPARC	P09486
SL014094	991	0.000405921	0.000669668	0.678605	-0.000588894	0.000503984	0.000758717	0.658556	GP114	ADGRG5	Q8IZF4
SL004747	994	0.000456041	0.000753709	0.678856	-0.000632412	0.000404011	0.000852793	0.772318	ApoM	APOM	O95445
SL006197	996	0.000564775	0.000945976	0.684859	-0.000496042	0.00042429	0.00107181	0.809349	DnaJ homolog	DNAJC19	Q96DA6
SL004751	992	0.000595072	0.0010015	0.686571	-0.000566798	0.000533721	0.0011342	0.772908	HO-2	HMOX2	P30519
SL005508	993	-0.000560806	0.000946119	0.687107	-0.000633859	-0.00185264	0.00106716	0.161393	Carbonic anhydrase 9	CA9	Q16790
SL003104	987	0.000470167	0.000795557	0.687908	-0.000633781	0.000635329	0.000900374	0.638184	Eotaxin-2	CCL24	O00175
SL001713	987	0.00050916	0.000865622	0.68935	-0.000642767	-0.000529408	0.000976997	0.733486	IL-17	IL17A	Q16552
SL004144	988	0.000398565	0.000678205	0.68935	-0.000585911	-0.000124793	0.000766571	0.923226	GFRa-3	GFRA3	O60609
SL005228	988	-0.000485975	0.000830171	0.689881	-0.00064523	-0.000858971	0.000938517	0.523335	ULBP-2	ULBP2	Q9BZM5
SL006911	986	0.000276241	0.000472005	0.689881	-0.000626207	0.000232431	0.000533678	0.790946	CHK1	CHEK1	O14757
SL004064	987	0.000419355	0.000717253	0.689881	-0.000654711	-0.00015357	0.000812786	0.914641	GIB	PLA2G1B	P04054
SL004643	996	0.000628291	0.00108269	0.692848	-0.000537928	0.000520925	0.00122518	0.796992	Angiopoietin-4	ANGPT4	Q9Y264
SL010393	997	0.000712371	0.0012327	0.694194	-0.000518776	0.00127979	0.00139525	0.522987	KREM2	KREMEN2	Q8NCW0
SL000136	997	0.000935291	0.00163502	0.698412	-0.000516302	0.00101456	0.00185132	0.72891	AREG	AREG	P15514
SL009951	988	-0.000491573	0.000860939	0.69864	-0.000666312	-0.0010592	0.000974696	0.427661	WNT7A	WNT7A	O00755
SL007121	988	-0.000431974	0.000765946	0.703804	-0.000665144	-0.000185876	0.000867477	0.906312	CATE	CTSE	P14091
SL006108	995	0.00050943	0.000904537	0.703804	-0.000683745	-0.000237098	0.00102231	0.898862	CD5L	CD5L	O43866
SL003220	994	-0.000194946	0.000348707	0.705504	-0.000691739	-0.000212477	0.000394476	0.734864	C3adesArg	C3	P01024
SL016563	989	0.000362949	0.000649295	0.705504	-0.00067089	0.000393256	0.000735139	0.736929	GHC2	SLC25A18	Q9H1K4
SL010523	988	0.000753872	0.00134915	0.705504	-0.000698549	0.00103424	0.00152621	0.653098	HIPK3	HIPK3	Q9H422
SL000540	990	0.000440035	0.0007903	0.705895	-0.000652511	0.000404221	0.000893178	0.781996	Plasmin	PLG	P00747
SL000670	986	0.00063488	0.0011419	0.705895	-0.000694602	4.77514e-06	0.00129243	0.998588	GSTA3	GSTA3	Q16772
SL005679	997	0.000908092	0.00163627	0.705895	-0.000495729	0.00150943	0.0018523	0.580386	TCTP	TPT1	P13693
SL003726	987	0.000935982	0.00168778	0.705895	-0.00070337	0.00187353	0.00190738	0.48722	Chk2	CHEK2	O96017
SL008143	997	-0.000915572	0.00165166	0.705895	-0.000510017	2.68472e-05	0.00186908	0.9962	UBE2N	UBE2N	P61088
SL004467	995	-0.000482806	0.000873	0.706312	-0.000672091	-8.36611e-05	0.000987292	0.96283	protein Z inhibitor	SERPINA10	Q9UK55
SL001890	991	-0.000425743	0.000772499	0.707249	-0.000614685	-0.000150916	0.000873793	0.91945	GA733-1 protein	TACSTD2	P09758
SL005170	993	0.000465842	0.000847086	0.707542	-0.000615607	0.00049062	0.000957504	0.751086	ICOS	ICOS	Q9Y6W8
SL014208	988	-0.000588227	0.00107109	0.707542	-0.000606993	-0.000464513	0.00121306	0.816129	CRTAM	CRTAM	O95727
SL005187	994	0.000704483	0.0012904	0.709582	-0.000557584	0.00115693	0.0014606	0.592035	IL-3 Ra	IL3RA	P26951
SL005179	985	0.000436434	0.000802403	0.710088	-0.000690797	0.000614001	0.00090622	0.653098	IL-1F8	IL36B	Q9NZH7
SL000138	989	0.000447012	0.000822091	0.710088	-0.000641047	0.000268497	0.000930673	0.864021	HB-EGF	HBEGF	Q99075
SL010529	997	0.000569207	0.00104847	0.710138	-0.000516924	0.000908521	0.00118695	0.607045	UFC1	UFC1	Q9Y3C8
SL004654	992	0.000402054	0.000752737	0.715653	-0.000671123	0.000691687	0.000851283	0.581664	Granzyme H	GZMH	P20718
SL000006	996	0.000780861	0.00146215	0.715653	-0.000680794	0.000879782	0.00165585	0.738051	PAI-1	SERPINE1	P05121
SL004771	985	0.000533818	0.000999856	0.715653	-0.000715518	-0.000262881	0.00113068	0.898862	Aurora kinase A	AURKA	O14965
SL014269	991	0.000796321	0.00149681	0.716156	-0.000716044	0.00111062	0.00169267	0.663798	KI3L2	KIR3DL2	P43630
SL003349	990	0.000435638	0.000819331	0.716156	-0.000663767	-0.000245417	0.000926234	0.876672	HIF-1a	HIF1A	Q16665
SL007024	991	0.000514972	0.000978246	0.719432	-0.00065015	0.000334852	0.00110761	0.85737	GREM1	GREM1	O60565
SL014096	986	-0.000368729	0.000700765	0.719432	-0.000691773	-0.000684588	0.00079065	0.551757	LRRT1	LRRTM1	Q86UE6
SL000076	989	-0.000575858	0.00109685	0.719744	-0.000667041	-0.000798412	0.00124405	0.671985	p27Kip1	CDKN1B	P46527
SL003041	996	-0.000970341	0.00185749	0.721261	-0.000661644	0.000478611	0.00210111	0.900122	PF-4	PF4	P02776
SL005575	990	0.000432792	0.000834275	0.723626	-0.000737548	4.80285e-05	0.000944757	0.98057	Fucosyltransferase 3	FUT3	P21217
SL004482	990	0.000242397	0.000469644	0.724807	-0.000726106	-0.000196484	0.000531196	0.822295	Endoglin	ENG	P17813
SL004838	995	0.000599077	0.00116156	0.724807	-0.000584003	0.00102192	0.00131303	0.599152	CD47	CD47	Q08722
SL011631	997	-0.000909939	0.00177682	0.727178	-0.000541875	-0.000632554	0.0020118	0.850695	NACA	NACA	Q13765
SL004692	986	-0.000321241	0.000628859	0.727586	-0.000715281	-0.000556393	0.000710868	0.597489	CLF-1/CLC Complex	CRLF1 CLCF1	O75462 Q9UBD9
SL003308	988	-0.000409737	0.000805075	0.728496	-0.000738767	-0.00110778	0.000909054	0.365403	IL-4 sR	IL4R	P24394
SL010349	996	0.000490124	0.000966076	0.729171	-0.000747051	0.00162064	0.0010913	0.244998	FN1.3	FN1	P02751
SL013928	997	-0.000842946	0.00168254	0.733803	-0.000552739	1.54127e-05	0.00190425	0.997377	PPIE	PPIE	Q9UNP9
SL008590	991	0.000388239	0.000782425	0.737151	-0.000710828	0.000603514	0.000885634	0.651482	Olfactomedin-4	OLFM4	Q6UX06
SL003307	997	0.000751387	0.00152549	0.739534	-0.000572256	0.00122107	0.00172701	0.638184	IL-2 sRg	IL2RG	P31785
SL009868	986	-0.000402287	0.0008271	0.744044	-0.000743101	-9.4637e-05	0.000934325	0.955183	SSRP1	SSRP1	Q08945
SL007272	988	0.00035847	0.000739199	0.744575	-0.000697738	-0.000150687	0.000836357	0.914641	HXK2	HK2	P52789
SL004331	992	-0.000216526	0.000451138	0.747503	-0.000735879	-0.000244961	0.000510311	0.771627	CNTF	CNTF	P26441
SL016550	997	-0.0008537	0.00177911	0.747503	-0.000559332	-0.000677674	0.00201445	0.840669	CK2-A1:B	CSNK2A1 CSNK2B	P68400 P67870
SL004872	997	-0.000657044	0.00139511	0.753746	-0.000627517	0.000232763	0.00157853	0.932694	EDAR	EDAR	Q9UNE0
SL005493	992	0.000386953	0.000821874	0.753746	-0.00069568	0.000302757	0.000929881	0.846281	paraoxonase 1	PON1	P27169
SL007284	991	0.000381843	0.000812702	0.753884	-0.000739432	0.000823251	0.0009187	0.533677	CRIS3	CRISP3	P54108
SL007195	985	-0.000385179	0.000826225	0.75486	-0.000768627	-0.000527489	0.000931572	0.717513	CD70	CD70	P32970
SL011073	997	-0.000737704	0.00158445	0.75486	-0.000591787	2.11262e-05	0.00179333	0.996842	XPNPEP1	XPNPEP1	Q9NQW7
SL004823	996	-0.000505106	0.0010852	0.75486	-0.000581836	5.63716e-06	0.00122839	0.998588	Cyclophilin A	PPIA	P62937
SL004676	993	0.000179557	0.000385778	0.75486	-0.000785726	-0.000339977	0.000435118	0.597949	IGFBP-5	IGFBP5	P24593
SL003331	983	-0.000320788	0.000702539	0.761326	-0.000766978	-0.000428168	0.00079358	0.734787	MMP-16	MMP16	P51512
SL004348	995	0.000448431	0.000983088	0.761326	-0.00062152	0.000735077	0.0011126	0.660845	IFN-lambda 1	IFNL1	Q8IU54
SL016553	989	-0.000333151	0.000735841	0.762787	-0.000721088	-0.000678702	0.000832049	0.580371	PDE3A	PDE3A	Q14432
SL001999	994	0.000465962	0.00102948	0.762787	-0.000642779	0.000406025	0.0011653	0.832539	MDM2	MDM2	Q00987
SL004795	997	-0.000661772	0.00146878	0.762787	-0.000585812	-0.000305364	0.00166292	0.914641	ERAB	HSD17B10	Q99714
SL004136	988	-0.000221531	0.000491791	0.762787	-0.000771884	-0.000167381	0.00055739	0.858089	Dtk	TYRO3	Q06418
SL000346	992	-0.00034595	0.000768191	0.762787	-0.00080743	-0.000870673	0.000869404	0.47491	Cathepsin H	CTSH	P09668
SL007358	995	0.00057522	0.0012832	0.763849	-0.000667286	0.00105525	0.00145159	0.629517	KPCT	PRKCQ	Q04759
SL003520	990	0.000281813	0.000631896	0.765092	-0.000776533	-0.000141886	0.000714233	0.913706	calreticulin	CALR	P27797
SL014896	982	0.000446786	0.00100567	0.765852	-0.000805676	0.000541562	0.00113921	0.771627	ANK2	ANK2	Q01484
SL003648	997	-0.000554703	0.00125816	0.768011	-0.000590804	0.000286458	0.00142346	0.913583	Rab GDP dissociation inhibitor beta	GDI2	P50395
SL009341	990	-0.000244797	0.000558351	0.769396	-0.000739342	-0.000697931	0.000632426	0.41968	BASI	BSG	P35613
SL005687	997	0.000573354	0.00131229	0.769986	-0.000595325	0.0010042	0.00148561	0.653122	eIF-5A-1	EIF5A	P63241
SL000426	996	-0.000409016	0.000939854	0.770037	-0.000810666	0.000833681	0.00106094	0.595615	Fibronectin	FN1	P02751
SL011528	989	0.00045316	0.00104228	0.770037	-0.00068559	0.000625396	0.00117998	0.738051	RS7	RPS7	P62081
SL004687	993	0.000414337	0.000953808	0.770037	-0.000681915	0.000519754	0.00107929	0.77137	TSLP	TSLP	Q969D9
SL000252	996	0.000252774	0.000585984	0.771363	-0.000773091	0.000600334	0.000662686	0.528509	a2-Macroglobulin	A2M	P01023
SL004725	994	0.000486719	0.00112877	0.771363	-0.000722063	0.000246353	0.00127816	0.914641	Hat1	HAT1	O14929
SL009628	997	-0.000661642	0.00154815	0.773477	-0.000580279	0.0002932	0.00175177	0.922413	ING1	ING1	Q9UK53
SL004078	995	0.000527776	0.00123632	0.773477	-0.000818216	0.00134889	0.00139743	0.494747	BMP-7	BMP7	P18075
SL003735	983	-0.000290118	0.000680652	0.773477	-0.000813286	-0.000340865	0.000769859	0.786306	4-1BB ligand	TNFSF9	P41273
SL006698	991	-0.000219108	0.000516143	0.774241	-0.000753704	-0.000324881	0.000583643	0.722928	transcription factor MLR1, isoform CRA_b	LCORL	Q8N3X6
SL009202	986	0.00032365	0.000764809	0.774675	-0.000807832	-0.000194061	0.000864761	0.900718	JAML1	AMICA1	Q86YT9
SL004230	989	0.000497584	0.00118058	0.774756	-0.000780064	0.000428956	0.00133653	0.847499	tau	MAPT	P10636
SL006476	997	-0.00061777	0.00146583	0.774756	-0.000588679	-0.000166831	0.00165947	0.955183	NMT1	NMT1	P30419
SL010491	997	0.000380474	0.000915956	0.779164	-0.000662826	0.000708762	0.0010369	0.6504	CAMK2A	CAMK2A	Q9UQM7
SL004333	991	-0.000305444	0.000749062	0.784886	-0.000700267	-0.000637916	0.000847218	0.612728	FGF-10	FGF10	O15520
SL004068	990	0.000268357	0.000660444	0.785048	-0.000797459	0.00049848	0.000747115	0.658056	Granzyme B	GZMB	P10144
SL004811	997	-0.000493604	0.00121598	0.785048	-0.000590292	0.000591886	0.00137488	0.793118	Transgelin-2	TAGLN2	P37802
SL004335	988	-0.000203189	0.000505806	0.787523	-0.000798326	9.91128e-06	0.000571701	0.995811	FGF-17	FGF17	O60258
SL000617	995	0.000278332	0.000693491	0.787523	-0.000682527	0.000694834	0.000784301	0.540467	ALT	GPT	P24298
SL004336	987	-0.000241749	0.000605589	0.788643	-0.000807157	-0.000225991	0.000686843	0.844802	FGF-18	FGF18	O76093
SL003192	991	9.97698e-05	0.00025164	0.790238	-0.000841943	0.000299207	0.000284255	0.445222	Properdin	CFP	P27918
SL014308	994	0.000507677	0.00128426	0.79053	-0.000689983	0.000827088	0.00145364	0.715865	FGF-8A	FGF8	P55075
SL004340	995	0.000497106	0.0012734	0.793989	-0.000702737	0.000568504	0.00144152	0.809462	FGF-6	FGF6	P10767
SL000480	993	-0.000307247	0.000793443	0.795942	-0.000710074	-0.000161519	0.000897832	0.914641	IL-4	IL4	P05112
SL004511	996	0.000477355	0.00123639	0.796211	-0.000852969	-0.00046831	0.00139872	0.841303	BPI	BPI	P17213
SL004781	997	-0.000800123	0.00208395	0.796895	-0.00061804	0.000335681	0.0023584	0.933483	CSK	CSK	P41240
SL004253	988	-0.000254149	0.000662497	0.796895	-0.000831741	-0.000211722	0.000750227	0.867901	17-beta-HSD 1	HSD17B1	P14061
SL007752	991	0.000343294	0.000907897	0.800338	-0.000739025	0.000380627	0.00102592	0.822295	DAPK2	DAPK2	Q9UIK4
SL011630	997	-0.000546979	0.0014475	0.800338	-0.000695021	-0.000792821	0.00163891	0.77137	SE6L2	SEZ6L2	Q6UXD5
SL004305	985	-0.000246842	0.000654672	0.800342	-0.000837912	-0.000353536	0.000739833	0.771627	Topoisomerase I	TOP1	P11387
SL010510	997	0.000361556	0.000962619	0.800865	-0.000700018	0.000417226	0.00108997	0.816129	PAK7	PAK7	Q9P286
SL009629	995	0.0003717	0.000997262	0.801791	-0.000789115	-0.000207656	0.00112835	0.914641	MBD4	MBD4	O95243
SL016557	987	-0.000263572	0.000707607	0.801791	-0.00084513	-0.000640114	0.000799825	0.588325	HMGR	HMGCR	P04035
SL012148	988	0.00031022	0.000833899	0.801791	-0.000866661	-0.000324114	0.000942812	0.835807	PEX5	PEX5	P50542
SL000312	994	0.000247113	0.000686818	0.81138	-0.000875568	-0.000232642	0.000776282	0.858089	C3	C3	P01024
SL004128	991	0.000263906	0.000737772	0.812241	-0.0008311	0.000242807	0.000835004	0.863538	Activin RIB	ACVR1B	P36896
SL004415	993	0.000306184	0.000857411	0.812241	-0.00074784	0.000467496	0.000969726	0.77137	ACE2	ACE2	Q9BYF1
SL004457	996	0.000435381	0.0012768	0.822959	-0.000833345	0.00101544	0.00144433	0.638184	Protease nexin I	SERPINE2	P07093
SL004605	988	0.000248732	0.000732719	0.822959	-0.000846784	-0.000158758	0.000829459	0.914641	40S ribosomal protein SA	RPSA	P08865
SL006919	997	0.00037578	0.00110898	0.822959	-0.000702081	0.000598166	0.0012556	0.771627	RSK-like protein kinase	RPS6KA5	O75582
SL006378	997	-0.0004732	0.00139716	0.822959	-0.000701152	0.000255645	0.00158123	0.923408	Esterase D	ESD	P10768
SL010610	986	-0.000190992	0.000567363	0.822959	-0.000857958	-0.000378724	0.000641776	0.702018	CLC4K	CD207	Q9UJ71
SL004306	997	0.000456673	0.00135698	0.822959	-0.000650966	0.00107348	0.00153594	0.640941	UBC9	UBE2I	P63279
SL000088	993	-0.000337158	0.0010021	0.822959	-0.000785704	-0.000327291	0.00113452	0.864021	TGF-b2	TGFB2	P61812
SL008059	993	-0.000318887	0.000948825	0.822959	-0.000799253	-0.000495696	0.0010744	0.779213	RS3	RPS3	P23396
SL003990	991	0.000337137	0.00100334	0.822959	-0.000880274	-0.00101705	0.00113269	0.532883	FGFR-2	FGFR2	P21802
SL016551	996	-0.000501925	0.00149466	0.822959	-0.000694951	-0.000154967	0.00169245	0.959514	CK2-A2:B	CSNK2A2 CSNK2B	P19784 P67870
SL001905	992	-0.000408157	0.00121774	0.822959	-0.000805862	-0.000611476	0.0013801	0.786306	Mesothelin	MSLN	Q13421
SL005206	992	0.000257659	0.000775099	0.824571	-0.000753288	0.000287534	0.000876773	0.844993	NKp44	NCR2	O95944
SL003657	997	0.000475522	0.00144137	0.825371	-0.00060538	0.00136673	0.00163094	0.566963	Calcineurin	PPP3CA PPP3R1	Q08209 P63098
SL003280	991	-0.000220957	0.000669995	0.825371	-0.000703294	-0.000356881	0.000757921	0.772908	HMG-1	HMGB1	P09429
SL004636	997	-0.000522419	0.00159581	0.826699	-0.000613083	0.00015356	0.00180635	0.96283	Flt-3	FLT3	P36888
SL011549	997	0.000385969	0.00118751	0.827965	-0.000741198	0.000319539	0.00134461	0.895492	ARI3A	ARID3A	Q99856
SL003710	988	-0.000349639	0.00110573	0.834674	-0.000793761	-0.000604414	0.00125204	0.77137	Caspase-2	CASP2	P42575
SL010462	991	-0.000211354	0.000675256	0.836664	-0.000904195	-0.000887192	0.000763421	0.389927	FCN1	FCN1	O00602
SL010467	993	0.00010867	0.000351935	0.839505	-0.000900404	-0.000229461	0.000397431	0.710002	RGMA	RGMA	Q96B86
SL006892	984	0.000216916	0.000708522	0.841003	-0.000870137	0.00015944	0.000801295	0.913706	ABL1	ABL1	P00519
SL003918	988	0.000138663	0.000466533	0.847819	-0.000896932	-1.32314e-05	0.000526991	0.992949	kallikrein 13	KLK13	Q9UKR3
SL001718	991	-0.000261961	0.000885221	0.84819	-0.000854987	-0.00105379	0.00100145	0.445222	IL-13	IL13	P35225
SL007774	989	0.000307985	0.00104659	0.848242	-0.000888678	-0.000369997	0.00118458	0.851738	JAG2	JAG2	Q9Y219
SL007531	989	0.000240028	0.000815981	0.848242	-0.000879215	0.000360574	0.000923242	0.811624	BMPER	BMPER	Q8N8U9
SL017612	997	-0.000416264	0.00144134	0.852035	-0.000650536	0.000440832	0.00163099	0.874366	HSP 90a/b	HSP90AA1 HSP90AB1	P07900 P08238
SL007385	995	-0.000345218	0.00121274	0.85481	-0.000774236	-0.000196643	0.00137489	0.933483	IL24	IL24	Q13007
SL008378	996	0.000351761	0.00124188	0.855276	-0.000854966	0.000656147	0.00140653	0.77571	4EBP2	EIF4EBP2	Q13542
SL011400	994	-0.000307554	0.0011088	0.859506	-0.000797935	-0.000106412	0.00125562	0.96283	PDE1A	PDE1A	P54750
SL010250	997	-0.000400399	0.00146588	0.862349	-0.000673646	0.000180834	0.00165934	0.952788	Stress-induced-phosphoprotein 1	STIP1	P31948
SL004330	993	-0.000206886	0.000761677	0.862911	-0.000767979	-0.000446562	0.000862849	0.747355	CD22	CD22	P20273
SL003169	992	-0.00020486	0.000761932	0.864083	-0.000828724	-0.000142124	0.00086153	0.92266	ENA-78	CXCL5	P42830
SL018625	992	0.000108591	0.000405551	0.864083	-0.000911933	0.000192358	0.000458933	0.799308	TLR4:MD-2 complex	TLR4 LY96	O00206 Q9Y6Y9
SL004484	996	0.000331118	0.00123718	0.864083	-0.000725865	0.000205802	0.00140084	0.932694	SP-D	SFTPD	P35247
SL014289	991	0.000274681	0.00103269	0.86475	-0.00086084	-0.000218095	0.00116823	0.914641	KI3S1	KIR3DS1	Q14943
SL010494	995	-0.000217882	0.000826346	0.865886	-0.000773252	-0.000463792	0.000934882	0.763766	CDK1/cyclin B	CDC2 CCNB1	P06493 P14635
SL002542	989	-0.000126334	0.000480847	0.865886	-0.000910758	-0.000193426	0.000543338	0.827574	K-ras	KRAS	P01116
SL003674	997	-0.000311322	0.00118805	0.865886	-0.000686561	0.000430201	0.00134428	0.847499	BCL2-like 1 protein	BCL2L1	Q07817
SL000483	992	0.000186022	0.000718444	0.867786	-0.000872813	3.77372e-05	0.000812811	0.982229	IL-7	IL7	P13232
SL007747	992	0.000243884	0.000949408	0.868777	-0.000863775	-8.4689e-05	0.00107471	0.966935	TBK1	TBK1	Q9UHD2
SL014684	991	-0.000252002	0.00099474	0.87103	-0.000882313	-0.0012244	0.00112356	0.42609	OAS1	OAS1	P00973
SL000479	991	-0.000174271	0.000696074	0.8728	-0.000891512	-0.000322164	0.000787008	0.801953	IL-3	IL3	P08700
SL000450	997	0.000406911	0.00163891	0.873632	-0.000687525	0.000802372	0.00185554	0.792446	HSP 60	HSPD1	P10809
SL008072	993	-0.000333402	0.00134634	0.873632	-0.000946692	-0.000666522	0.00152439	0.790188	CO8A1	COL8A1	P27658
SL003722	997	-0.000372436	0.00151363	0.873684	-0.000659411	0.000817847	0.00171198	0.771627	PKB beta	AKT2	P31751
SL010463	989	0.000205239	0.000834851	0.873684	-0.000918104	0.000250841	0.000943912	0.876672	GPC2	GPC2	Q8N158
SL000535	997	-0.000393642	0.00160927	0.873989	-0.000847194	0.000265973	0.00182163	0.932694	PDGF-AA	PDGFA	P04085
SL003305	989	-0.000222323	0.000931407	0.87822	-0.000877687	-0.000726862	0.00105368	0.646494	IL-2 sRa	IL2RA	P01589
SL018887	994	-0.000174724	0.000763342	0.885717	-0.00094635	0.000713787	0.000861888	0.573215	QORL1	CRYZL1	O95825
SL004350	989	-0.000120442	0.000532753	0.887349	-0.000904429	6.96679e-07	0.000603766	0.99908	IL-17B	IL17B	Q9UHF5
SL005266	997	-0.000319074	0.00142281	0.88814	-0.000734035	2.70087e-05	0.00161088	0.995811	a-Synuclein	SNCA	P37840
SL005217	988	-0.00015627	0.00069962	0.888152	-0.000945763	-0.000195496	0.000791579	0.889035	Siglec-6	SIGLEC6	O43699
SL018629	986	0.000149941	0.000677961	0.889261	-0.00093809	9.04645e-05	0.000767428	0.947708	RNF43	RNF43	Q68DV7
SL004685	991	-0.000154296	0.00070568	0.890635	-0.000802377	-0.000244961	0.0007994	0.854587	Persephin	PSPN	O60542
SL004901	986	0.000103013	0.000483451	0.894569	-0.00095701	8.10865e-06	0.000547182	0.9962	Protein disulfide-isomerase	P4HB	P07237
SL000633	986	-0.000168158	0.000797979	0.895799	-0.000958598	-0.000575577	0.00090285	0.674156	Fas ligand, soluble	FASLG	P48023
SL007729	993	0.00020586	0.000984307	0.89639	-0.000917656	0.000229664	0.00111326	0.912336	ARTS1	ERAP1	Q9NZ08
SL007620	989	-0.000195701	0.000945372	0.897438	-0.000936668	-9.787e-05	0.00106859	0.959514	IL-12 RB2	IL12RB2	Q99665
SL004589	996	-0.000205651	0.000999864	0.897812	-0.000777212	7.63857e-05	0.00113189	0.972319	Azurocidin	AZU1	P20160
SL011232	997	0.000245869	0.0012024	0.898074	-0.000742681	9.04015e-05	0.00136143	0.972319	CDC37	CDC37	Q16543
SL001731	995	-0.000231602	0.00115261	0.900302	-0.000682522	0.000249648	0.00130424	0.914641	NSE	ENO2	P09104
SL014029	991	-0.000113367	0.000596892	0.908779	-0.000858095	-0.000164857	0.000675354	0.890727	SPHK2	SPHK2	Q9NRA0
SL004861	990	-0.000130239	0.000715768	0.914713	-0.000879842	-2.77787e-05	0.000809282	0.989355	IL-18 Rb	IL18RAP	O95256
SL005220	988	-0.000104703	0.000580733	0.915355	-0.000942717	-8.06585e-05	0.000656573	0.944353	Sonic Hedgehog	SHH	Q15465
SL009768	988	8.75747e-05	0.000504019	0.920087	-0.000929525	1.34597e-05	0.000570543	0.993401	CBX5	CBX5	P45973
SL005730	990	-0.000125215	0.000726609	0.920527	-0.000824575	-0.000582074	0.000822815	0.638184	cGMP-stimulated PDE	PDE2A	O00408
SL017614	997	0.000257902	0.00153603	0.923481	-0.000719691	0.0011578	0.00173818	0.658315	PKB a/b/g	AKT1 AKT2 AKT3	P31749 P31751 Q9Y243
SL006918	997	0.000278062	0.00168306	0.924535	-0.000738103	0.000874754	0.00190529	0.779213	MK01	MAPK1	P28482
SL000007	993	0.000118881	0.000722555	0.924535	-0.000872436	0.000431351	0.0008176	0.739428	ER	ESR1	P03372
SL003647	997	-0.000245988	0.00150053	0.924535	-0.000900223	0.000627295	0.00169801	0.822295	annexin VI	ANXA6	P08133
SL005694	997	-0.000277058	0.00172571	0.92589	-0.000689185	0.000806735	0.00195263	0.800126	Peroxiredoxin-6	PRDX6	P30041
SL005235	983	-0.000103538	0.000645063	0.92589	-0.000946646	-0.000120079	0.000730526	0.92266	NANOG	NANOG	Q9H9S0
SL002646	988	0.000176346	0.00113057	0.928918	-0.000980277	0.000236085	0.00128116	0.914641	MMP-14	MMP14	P50281
SL013872	993	-7.53111e-05	0.000491871	0.930556	-0.000980518	0.000636793	0.000554615	0.39685	LRP1B	LRP1B	Q9NZR2
SL004346	995	-0.000112463	0.000769866	0.935669	-0.000802237	-9.39863e-05	0.000871321	0.952944	IL-20	IL20	Q9NYY1
SL002078	988	-0.000141814	0.00101854	0.939535	-0.000967615	-1.34314e-05	0.00115358	0.996842	TGF-b R II	TGFBR2	P37173
SL003700	997	-0.000231982	0.00167198	0.939535	-0.000726004	0.000242363	0.00189291	0.941168	BAD	BAD	Q92934
SL000133	990	0.000121008	0.000872368	0.939535	-0.000928836	9.51398e-05	0.000987032	0.957833	MIP-3a	CCL20	P78556
SL004067	990	-8.93329e-05	0.000661483	0.941827	-0.000910258	0.000294323	0.000747189	0.809462	GX	PLA2G10	O15496
SL000470	990	0.000111904	0.000850637	0.943979	-0.000866757	5.59652e-05	0.000964027	0.976229	IL-11	IL11	P20809
SL004723	995	-0.00010863	0.000837448	0.944745	-0.000747418	0.000398254	0.000947133	0.798875	HDAC8	HDAC8	Q9BY41
SL000539	997	0.00015724	0.00123726	0.945041	-0.000728506	0.000850166	0.00140016	0.691657	PHI	GPI	P06744
SL004925	992	-7.30281e-05	0.00058288	0.945041	-0.000905699	-0.000577853	0.000658885	0.544263	AGR2	AGR2	O95994
SL003334	992	-6.02404e-05	0.00048143	0.945041	-0.000813725	1.69815e-05	0.00054487	0.990368	EMAP-2	AIMP1	Q12904
SL002695	996	0.000138156	0.00110727	0.945041	-0.000820727	0.000271364	0.0012533	0.905159	Glutamate carboxypeptidase	CNDP2	Q96KP4
SL010503	997	-0.000213352	0.00170996	0.945041	-0.000689082	0.000510481	0.00193557	0.876971	MAPK2	MAPKAPK2	P49137
SL007229	994	0.000126334	0.00104564	0.94742	-0.000779346	0.000543599	0.001184	0.779213	STAT6	STAT6	P42226
SL020172	985	-9.35329e-05	0.000779005	0.94742	-0.000955065	-0.000440199	0.000880731	0.761264	RXFP1	RXFP1	Q9HBX9
SL007324	995	0.000113105	0.000975629	0.950087	-0.000803593	0.000249997	0.00110432	0.900122	CSK21	CSNK2A1	P68400
SL008837	993	-7.78359e-05	0.000686084	0.950375	-0.000815946	0.000139811	0.000776357	0.914641	CD63	CD63	P08962
SL007361	989	7.98164e-05	0.000705701	0.950375	-0.000921733	-0.000576913	0.000796871	0.630031	LPPL	CLC	Q05315
SL005437	987	-6.84593e-05	0.000606811	0.950375	-0.000950774	-0.000139323	0.000686393	0.912868	MEPE	MEPE	Q9NQ76
SL000566	990	-4.53228e-05	0.000412008	0.951409	-0.000980312	-0.000184504	0.000466246	0.809349	RBP	RBP4	P02753
SL000384	983	-0.000107052	0.000975653	0.951409	-0.00100359	-0.00187108	0.00109597	0.170304	CTLA-4	CTLA4	P16410
SL000454	997	-0.000123163	0.00113419	0.951472	-0.000698994	0.000492357	0.00128356	0.816129	HSP 90b	HSP90AB1	P08238
SL004708	997	-0.000193376	0.00179378	0.951472	-0.00088524	0.000726365	0.00203014	0.827422	CTAP-III	PPBP	P02775
SL004063	989	-8.21172e-05	0.000779555	0.952744	-0.000946912	-0.000682977	0.000882175	0.601199	FGFR-3	FGFR3	P22607
SL011406	993	8.29013e-05	0.000810602	0.954512	-0.000894095	-8.69129e-05	0.000917369	0.958427	PDE7A	PDE7A	Q13946
SL003863	984	-6.71099e-05	0.000704946	0.959572	-0.0009995	0.000247306	0.000796489	0.852584	kallikrein 5	KLK5	Q9Y337
SL008402	989	-5.74667e-05	0.000609533	0.959572	-0.000978297	-0.000780019	0.000687237	0.403748	LYPD3	LYPD3	O95274
SL003191	997	-0.000169617	0.00185496	0.960482	-0.000881303	0.000719082	0.00209951	0.836166	NAP-2	PPBP	P02775
SL011709	997	-0.000151056	0.00165422	0.960482	-0.000760084	0.000309034	0.00187281	0.92266	PLPP	PDXP	Q96GD0
SL000027	991	-6.9994e-05	0.000793074	0.962234	-0.00090543	-0.000285444	0.000897122	0.848213	COX-2	PTGS2	P35354
SL008063	997	0.000160123	0.00185356	0.963005	-0.000820085	0.000466934	0.00209868	0.901595	PPAC	ACP1	P24666
SL005250	993	-6.79086e-05	0.000825148	0.965598	-0.000844163	0.000156583	0.000933663	0.922413	Chymase	CMA1	P23946
SL004334	997	0.000128215	0.00158555	0.966009	-0.000752315	0.00053144	0.00179511	0.859775	FGF-16	FGF16	O43320
SL013489	984	5.24788e-05	0.000663504	0.966388	-0.000996709	0.000345336	0.00075005	0.779213	AMNLS	AMN	Q9BXJ7
SL000305	990	-8.14645e-05	0.00104473	0.966388	-0.00100206	-0.000424019	0.00118185	0.827422	b-NGF	NGF	P01138
SL009792	995	-8.92973e-05	0.00115073	0.966388	-0.000835292	-0.000172234	0.00130334	0.938917	PUR8	ADSL	P30566
SL005197	992	6.09316e-05	0.00081023	0.967586	-0.000942434	-0.000296087	0.00091794	0.847408	LIMP II	SCARB2	Q14108
SL000125	988	5.90143e-05	0.000811763	0.96887	-0.000950736	-4.22947e-05	0.000920325	0.982229	IL-1a	IL1A	P01583
SL004182	995	-5.87316e-05	0.000823822	0.969191	-0.000829708	-6.12569e-05	0.000932841	0.972319	GV	PLA2G5	P39877
SL006512	980	5.57493e-05	0.000801807	0.969191	-0.00102052	0.000757142	0.000907157	0.569018	HGFA	HGFAC	Q04756
SL000517	990	-5.61186e-05	0.000814473	0.969191	-0.000925313	-5.64902e-05	0.000921308	0.974337	MCP-4	CCL13	Q99616
SL004853	997	8.7847e-05	0.00128128	0.969191	-0.000761422	0.000100583	0.00145079	0.971627	B7-H2	ICOSLG	O75144
SL012248	989	-5.13383e-05	0.000795309	0.971286	-0.000929671	2.52936e-05	0.000899512	0.99141	FAK1	PTK2	Q05397
SL003800	987	-4.91121e-05	0.000765953	0.971286	-0.000934271	9.17255e-05	0.000866697	0.953276	Kallikrein 4	KLK4	Q9Y5K2
SL003171	996	6.3826e-05	0.0010311	0.972328	-0.000848497	0.000238424	0.00116723	0.912868	FGF-4	FGF4	P08620
SL007228	995	6.86289e-05	0.00118572	0.974837	-0.000782159	0.000256552	0.00134267	0.914641	KPCI	PRKCI	P41743
SL001717	988	-3.61799e-05	0.000655883	0.975455	-0.000979857	-2.87301e-05	0.000742286	0.986575	IL-10	IL10	P22301
SL008157	997	7.71762e-05	0.00141992	0.975455	-0.00076515	0.000166697	0.00160776	0.95411	UB2L3	UBE2L3	P68036
SL012188	997	6.64516e-05	0.00122389	0.975455	-0.000813844	0.000512014	0.00138548	0.822295	EP15R	EPS15L1	Q9UBC2
SL000498	997	6.6786e-05	0.00135052	0.97783	-0.000631806	-0.00033333	0.00152895	0.904647	Leptin	LEP	P41159
SL003178	988	3.54518e-05	0.000724159	0.97783	-0.000935639	0.000166647	0.000818246	0.912868	sICAM-3	ICAM3	P32942
SL000603	995	3.83366e-05	0.000801744	0.97783	-0.00100674	-0.00032277	0.000906876	0.827574	Trypsin	PRSS1	P07477
SL003728	988	4.45433e-05	0.000935836	0.97783	-0.000960113	-0.000625918	0.00105814	0.701508	cIAP-2	BIRC3	Q13489
SL000004	997	-9.12272e-05	0.00196202	0.977958	-0.000950864	-0.000710493	0.00222119	0.847499	bFGF	FGF2	P09038
SL004101	997	-8.19109e-05	0.00182109	0.978422	-0.00072448	0.000327732	0.00206183	0.924926	SMAD2	SMAD2	Q15796
SL002702	989	-2.96175e-05	0.000675709	0.978587	-0.000950213	-0.000113168	0.000764866	0.932694	PIM1	PIM1	P11309
SL008190	989	-3.52775e-05	0.000854562	0.979884	-0.000955927	-0.000387253	0.000966825	0.806649	SPTA2	SPTAN1	Q13813
SL000137	989	-2.95687e-05	0.000845824	0.983811	-0.000929643	-0.000388291	0.000957597	0.803839	BTC	BTC	P35070
SL005159	992	2.85285e-05	0.000835849	0.983811	-0.000837975	0.000133529	0.000945015	0.933589	EPO-R	EPOR	P19235
SL006920	997	-4.51136e-05	0.00134373	0.983811	-0.000717349	0.00085055	0.00152029	0.721905	MAPK14	MAPK14	Q16539
SL017610	997	4.74737e-05	0.00151663	0.984876	-0.000758095	0.00063325	0.00171682	0.822295	Gro-b/g	CXCL3 CXCL2	P19876 P19875
SL005034	997	6.1271e-05	0.00227802	0.987657	-0.0006809	2.53108e-05	0.0025794	0.997377	RAN	RAN	P62826
SL013988	993	2.50209e-05	0.00101659	0.988729	-0.000844102	-0.000259957	0.00115025	0.900122	CHST2	CHST2	Q9Y4C5
SL010505	991	1.8651e-05	0.000861891	0.990352	-0.000913777	-0.000460042	0.000974582	0.772908	MATK	MATK	P42679
SL017611	997	-3.02785e-05	0.00186622	0.993934	-0.000705384	0.00111925	0.00211167	0.738051	14-3-3	YWHAB,YWHAE,YWHAG,YWHAH,YWHAQ,YWHAZ,SFN	P31946, P62258, P61981, Q04917, P27348, P63104, P31947
SL010461	995	1.15999e-05	0.000860118	0.994116	-0.00091329	-0.000266212	0.00097398	0.87401	FCGR1	FCGR1A	P12314
SL010524	995	1.28733e-05	0.000967453	0.994116	-0.000832973	0.000355172	0.00109534	0.846685	WNK3	WNK3	Q9BYP7
SL004332	990	7.63253e-06	0.000612682	0.994116	-0.000929979	-0.000127293	0.000693467	0.914641	EG-VEGF	PROK1	P58294
SL009791	993	1.0359e-05	0.000851435	0.994116	-0.000772296	-4.97098e-06	0.000963038	0.998588	hnRNP A/B	HNRNPAB	Q99729
SL000345	992	8.73079e-06	0.000819531	0.99456	-0.000917692	-0.000245871	0.00092706	0.876672	Cathepsin G	CTSG	P08311
SL000020	994	-6.20788e-06	0.000806216	0.996155	-0.00101079	0.00109093	0.00091211	0.376205	Apo B	APOB	P04114
SL005258	990	1.65214e-06	0.000806251	0.999274	-0.000984088	-3.04065e-05	0.000912754	0.989402	PLK-1	PLK1	P53350
SL000560	997	-1.41904e-06	0.000864508	0.999274	-0.000840815	0.000176645	0.000978806	0.914641	P-Selectin	SELP	P16109
SL010613	988	4.45238e-07	0.000488889	0.999274	-0.000969502	-0.000137278	0.000552989	0.888698	IL-17 RD	IL17RD	Q8NFM7
