# Supplementary material for: Plasma proteomic biomarker signature of age predicts health and life span
Source: eLife. 2020 Nov 19;9:e61073. doi: 10.7554/eLife.61073 (PMC7723412; doi:10.7554/eLife.61073)
Supplement: Figure 1—source data 2. [file elife-61073-fig1-data2.xlsx]

## Sheet: Sheet1
SomaId	beta	SE	B-H FDR	Direction (BLSA/INCH)	Direction (INTERVAL/ LONGENITY)	B-H FDR (INTERVAL/ LONGENITY)
SL002704	0.018	0.0005	3.96154e-270	++	+	2.24e-180
SL009400	0.0134	0.0005	1.24029e-181	++	+	8.36e-38
SL009324	0.0101	0.0004	3.02483e-164	++	+	1.63e-81
SL010390	0.0114	0.0004	3.56474e-157	++	+	1.93e-34
SL000428	0.0342	0.0013	1.082e-154	++	+	2.8902e-320
SL000522	0.0195	0.0007	2.50907e-147	++	+	2.53e-92
SL002785	0.0345	0.0013	1.6913e-146	++	+	3.51e-85
SL000283	0.011	0.0004	1.08561e-140	++	NA	NA
SL006527	0.0092	0.0004	2.91424e-134	++	NA	NA
SL001777	0.0086	0.0003	6.17384e-133	++	NA	NA
SL001992	0.0098	0.0004	8.38061e-128	++	+	6.3e-21
SL006910	-0.013	0.0005	2.46189e-127	--	-	3.07e-111
SL000466	0.019	0.0008	1.22666e-124	++	NA	NA
SL002654	0.0093	0.0004	2.39384e-118	++	+	6.35e-12
SL008099	0.0138	0.0006	5.24466e-118	++	NA	NA
SL011888	0.0083	0.0004	6.66571e-116	++	+	2.61e-17
SL004626	0.0111	0.0005	5.52202e-114	++	+	7.69e-65
SL007631	0.0137	0.0006	2.78688e-107	++	+	2.89028402817129e-320
SL007033	0.008	0.0004	1.87995e-104	++	+	4.7e-44
SL005230	0.008	0.0004	5.69342e-102	++	+	9.65e-11
SL008178	0.0091	0.0004	2.09343e-99	++	+	4.47e-73
SL009412	0.0083	0.0004	1.43676e-97	++	NA	NA
SL008631	0.0075	0.0004	2.50442e-97	++	+	1.71e-18
SL005115	0.0082	0.0004	8.89884e-95	++	+	1.99e-50
SL003323	0.0139	0.0007	2.56697e-93	++	NA	NA
SL002506	0.008	0.0004	4.23066e-93	++	+	1.61e-16
SL002508	0.0085	0.0004	2.2814e-92	++	+	1.2e-12
SL001800	0.0087	0.0004	2.83528e-91	++	+	2.89e-13
SL012517	0.0132	0.0007	3.6905e-89	++	+	1.61e-86
SL007547	0.009	0.0005	4.9438e-84	++	+	1.93e-26
SL005156	0.0123	0.0006	1.58925e-83	++	+	8.3e-16
SL004646	0.0071	0.0004	2.29213e-78	++	+	0.103018
SL004557	0.0057	0.0003	1.30751e-77	++	+	3.81e-09
SL001766	0.0288	0.0015	1.46493e-75	++	+	2.38e-150
SL006230	0.0061	0.0003	3.25539e-75	++	NA	NA
SL012561	0.0104	0.0006	6.96211e-75	++	+	3.15e-62
SL004579	0.0069	0.0004	2.4719e-74	++	+	8.91e-33
SL004867	0.0146	0.0008	7.03874e-74	++	+	5.01e-35
SL005172	0.0073	0.0004	3.38585e-73	++	NA	NA
SL009207	0.0061	0.0003	3.8205e-71	++	+	9.4e-17
SL000247	-0.0288	0.0016	5.23188e-71	--	NA	NA
SL000591	0.0064	0.0004	1.68343e-70	++	NA	NA
SL006544	0.0061	0.0003	1.70047e-70	++	+	4.97e-23
SL000658	0.006	0.0003	2.30161e-70	++	+	0.000281543
SL005084	0.0071	0.0004	2.4275e-70	++	+	1.32e-06
SL012395	0.0093	0.0005	1.89392e-67	++	+	2.09e-50
SL002731	0.0064	0.0004	2.59197e-67	++	+	9.1e-38
SL003327	0.0069	0.0004	1.38649e-66	++	NA	NA
SL005213	0.0071	0.0004	3.59596e-65	++	NA	NA
SL004140	0.0054	0.0003	3.85963e-65	++	+	9.42e-07
SL002644	-0.0039	0.0002	7.65839e-65	--	-	5.94e-53
SL011499	0.014	0.0008	2.76401e-64	++	+	7.41e-82
SL008360	0.0053	0.0003	5.72199e-63	++	+	1.73e-08
SL010378	-0.0103	0.0006	3.16498e-60	--	-	5.07e-185
SL001888	0.0055	0.0003	7.89273e-59	++	NA	NA
SL006029	0.0164	0.001	7.89273e-59	++	+	1.16e-68
SL007179	0.0056	0.0003	8.4879e-59	++	NA	NA
SL005357	0.0108	0.0007	1.51776e-58	++	NA	NA
SL001774	0.0103	0.0006	2.13603e-58	++	NA	NA
SL005209	0.0056	0.0003	2.82168e-58	++	NA	NA
SL008382	0.0138	0.0008	4.20307e-58	++	NA	NA
SL003744	0.0049	0.0003	5.9371e-58	++	NA	NA
SL018509	0.0073	0.0004	8.75126e-58	++	+	1.34e-11
SL004556	0.0053	0.0003	1.15469e-57	++	+	1.24e-21
SL004686	0.0078	0.0005	2.85432e-57	++	+	1.68e-10
SL006119	0.01	0.0006	8.45844e-56	++	-	1.42e-09
SL006114	0.0059	0.0004	1.63409e-55	++	NA	NA
SL003340	0.0231	0.0015	5.65464e-55	++	+	4.68e-34
SL007207	0.0068	0.0004	6.40092e-54	++	NA	NA
SL005789	0.007	0.0004	1.45382e-53	++	+	1.07e-17
SL000525	0.011	0.0007	1.80315e-52	++	NA	NA
SL004843	0.0047	0.0003	1.60379e-51	++	+	0.398034
SL003329	0.0088	0.0006	1.75319e-51	++	+	9.63e-07
SL014092	-0.0055	0.0004	8.74966e-51	--	-	1.45e-109
SL002755	0.0101	0.0007	2.14323e-50	++	+	9.29e-05
SL004141	0.0047	0.0003	3.7729e-50	++	+	0.156226
SL003188	0.0111	0.0007	1.94983e-49	++	+	9.17e-26
SL003183	0.0106	0.0007	3.46824e-48	++	+	2.43e-47
SL005430	0.0057	0.0004	8.78338e-48	++	+	3.27e-09
SL008810	0.0048	0.0003	5.7244e-47	++	+	0.03809
SL008728	0.0057	0.0004	7.05396e-47	++	+	4.01e-12
SL004458	0.0097	0.0007	1.06541e-45	++	+	0.551078
SL000403	0.0055	0.0004	1.49367e-45	++	+	4.31e-06
SL000002	0.0048	0.0003	2.6372e-45	++	+	1.68e-36
SL002602	0.0078	0.0005	2.80471e-45	++	+	2.3e-11
SL006610	-0.0064	0.0005	8.33836e-45	--	-	7.52e-60
SL008486	0.0066	0.0005	1.44352e-44	++	+	4.53e-11
SL004863	0.0069	0.0005	2.82712e-44	++	+	2.49e-05
SL004355	0.0067	0.0005	5.01319e-44	++	+	0.143313
SL007502	0.0044	0.0003	6.46354e-44	++	+	5e-05
SL018256	-0.009	0.0006	1.35813e-43	--	NA	NA
SL004871	0.0048	0.0003	1.63674e-43	++	+	0.701903
SL002528	0.0102	0.0007	4.31268e-42	++	+	0.00156157
SL000406	0.0079	0.0006	2.82249e-41	++	+	8.87e-94
SL001938	0.0067	0.0005	3.87319e-41	++	NA	NA
SL010501	0.0085	0.0006	6.86311e-41	++	NA	NA
SL010450	0.0051	0.0004	1.95283e-40	++	+	0.222283
SL006970	0.0053	0.0004	5.7428e-40	++	+	0.514788
SL003672	0.0055	0.0004	6.48679e-40	++	NA	NA
SL014270	0.0059	0.0004	1.20323e-39	++	-	0.201468
SL003190	0.0071	0.0005	2.88643e-39	++	NA	NA
SL000506	0.0153	0.0012	4.78339e-39	++	+	1.62e-173
SL000343	0.006	0.0005	5.61306e-39	++	NA	NA
SL009349	0.0034	0.0003	1.4088e-38	++	+	0.809586
SL005764	0.0074	0.0006	2.02391e-38	++	+	2.68e-38
SL004858	0.0068	0.0005	4.04404e-38	++	+	3.02e-24
SL005191	0.0053	0.0004	1.2492e-37	++	+	9.22e-21
SL001998	0.0055	0.0004	3.69532e-37	++	+	4e-110
SL004352	0.0064	0.0005	1.16227e-36	++	NA	NA
SL000250	-0.0035	0.0003	1.23536e-36	--	-	7.98e-37
SL008380	0.0057	0.0004	1.62973e-36	++	+	2.01e-09
SL001720	0.0059	0.0005	2.62503e-36	++	-	0.111683
SL002688	0.0083	0.0006	3.35863e-36	++	NA	NA
SL000695	0.0047	0.0004	5.01733e-36	++	+	0.372425
SL010465	0.0039	0.0003	1.89654e-35	++	+	0.724078
SL000052	0.0071	0.0006	2.58754e-35	++	NA	NA
SL005193	0.005	0.0004	3.66595e-35	++	-	0.400896
SL011068	0.0056	0.0004	6.99042e-35	++	+	0.00081295
SL004016	0.004	0.0003	1.00968e-34	++	+	2.6e-07
SL003970	0.0081	0.0006	1.05048e-34	++	+	6.27e-16
SL000323	0.0054	0.0004	1.67957e-34	++	NA	NA
SL004151	0.0061	0.0005	3.72742e-34	++	+	0.00736168
SL007328	0.0039	0.0003	1.20762e-33	++	+	0.42774
SL000382	-0.0129	0.0011	2.74251e-33	--	NA	NA
SL000024	0.0061	0.0005	3.40015e-33	++	+	5.52e-08
SL000325	0.0049	0.0004	9.29856e-33	++	+	0.0001245
SL000451	0.0053	0.0004	1.10178e-32	++	NA	NA
SL007274	0.0043	0.0004	1.12652e-32	++	+	0.337181
SL000459	0.0082	0.0007	1.40308e-32	++	NA	NA
SL003060	0.0037	0.0003	3.68054e-32	++	NA	NA
SL010456	0.0091	0.0008	3.94834e-32	++	NA	NA
SL000427	0.0072	0.0006	4.64838e-32	++	-	0.17957
SL002823	-0.0043	0.0004	2.37772e-31	--	-	8.36e-131
SL003522	0.0063	0.0005	3.57823e-31	++	NA	NA
SL008516	0.009	0.0008	1.40718e-30	++	NA	NA
SL014008	0.0074	0.0006	3.04073e-30	++	+	2.34e-22
SL003302	0.0056	0.0005	3.14031e-30	++	-	0.00157229
SL009948	0.004	0.0003	4.21093e-30	++	+	9.33e-40
SL003643	0.0075	0.0006	4.95031e-30	++	+	5.08e-30
SL004143	0.0046	0.0004	6.81226e-30	++	+	0.429128
SL003301	0.0051	0.0004	1.3239e-29	++	-	0.63971
SL004258	0.0074	0.0007	2.32451e-29	++	NA	NA
SL003201	-0.0035	0.0003	4.54447e-29	--	-	2.92e-71
SL007100	0.0085	0.0008	5.47945e-29	++	+	0.223713
SL001996	0.0051	0.0005	7.89422e-29	++	+	0.472154
SL004650	0.005	0.0004	2.79405e-28	++	NA	NA
SL007206	0.0067	0.0006	5.17851e-28	++	+	0.0261983
SL003733	0.0046	0.0004	3.13375e-27	++	+	1.23e-16
SL004137	0.0061	0.0006	7.30034e-27	++	+	0.153202
SL010458	0.0052	0.0005	7.62248e-27	++	-	3.51e-05
SL010612	0.0086	0.0008	1.16325e-26	++	+	2.49e-28
SL019019	0.0048	0.0004	1.16325e-26	++	-	2.07e-21
SL000053	0.0086	0.0008	1.3179e-26	++	NA	NA
SL005195	0.0074	0.0007	1.60569e-26	++	NA	NA
SL003300	0.0065	0.0006	6.53586e-26	++	+	5.7e-13
SL000592	0.0033	0.0003	6.61604e-26	++	NA	NA
SL010470	0.0079	0.0007	6.89036e-26	++	+	7.3e-34
SL008158	0.0071	0.0007	8.74697e-26	++	NA	NA
SL014983	0.0073	0.0007	1.56689e-25	++	NA	NA
SL011809	0.0051	0.0005	2.32402e-25	++	+	7.4e-18
SL004357	-0.0051	0.0005	3.59943e-25	--	-	1.12e-16
SL018946	0.0043	0.0004	4.251e-25	++	+	1.63e-12
SL004010	-0.0057	0.0005	5.0739e-25	--	-	4.69e-55
SL000251	-0.0029	0.0003	7.92427e-25	--	-	2.45e-74
SL000510	0.0027	0.0003	9.24023e-25	++	+	0.686103
SL000051	0.0126	0.0012	1.12104e-24	++	+	1.45e-12
SL005059	0.0032	0.0003	1.18639e-24	++	+	0.219232
SL010468	0.0034	0.0003	1.26559e-24	++	-	0.0320427
SL008614	0.0046	0.0004	1.2987e-24	++	+	0.000422544
SL004837	0.0055	0.0005	1.35045e-24	++	+	0.0297055
SL005218	0.0038	0.0004	1.55364e-24	++	+	2.73e-58
SL018548	0.0041	0.0004	2.85468e-24	++	NA	NA
SL005403	-0.0043	0.0004	4.88697e-24	--	-	6.69e-33
SL012538	0.0042	0.0004	5.50955e-24	++	+	1.02e-10
SL004689	-0.0048	0.0005	9.95709e-24	--	NA	NA
SL014091	-0.011	0.0011	1.01654e-23	--	NA	NA
SL000519	0.0075	0.0007	1.09708e-23	++	+	1.14e-31
SL014113	0.0054	0.0005	1.78942e-23	++	+	0.0643023
SL008609	0.0051	0.0005	4.5629e-23	++	+	4.48e-16
SL005152	0.0051	0.0005	1.13927e-22	++	NA	NA
SL005087	0.0034	0.0003	1.23809e-22	++	+	6.06e-08
SL011069	-0.0039	0.0004	1.81429e-22	--	NA	NA
SL005699	-0.005	0.0005	1.88504e-22	--	-	7.09e-35
SL000613	0.0042	0.0004	2.52113e-22	++	+	6.46e-11
SL003770	0.0051	0.0005	2.75658e-22	++	+	1.14e-19
SL000678	0.0064	0.0006	4.08806e-22	++	+	8.49e-06
SL008414	0.0033	0.0003	5.26421e-22	++	-	9.19e-21
SL010288	-0.0088	0.0009	5.89167e-22	--	-	1.04e-19
SL003166	0.0026	0.0003	8.77833e-22	++	+	0.00370443
SL005183	-0.0054	0.0006	9.33178e-22	--	-	7.18e-20
SL004672	0.0042	0.0004	2.23677e-21	++	+	0.394509
SL000022	0.0042	0.0004	2.95657e-21	++	+	8.38e-11
SL014248	0.0039	0.0004	3.2069e-21	++	NA	NA
SL000565	0.0086	0.0009	3.44265e-21	++	+	0.821428
SL010381	-0.0042	0.0004	7.82591e-21	--	NA	NA
SL003182	0.0046	0.0005	9.93911e-21	++	+	2.23e-89
SL012769	0.0106	0.0011	3.17825e-20	++	+	6.21e-09
SL006694	-0.0098	0.001	3.40287e-20	--	NA	NA
SL000383	-0.0078	0.0008	5.50258e-20	--	NA	NA
SL003872	0.0025	0.0003	8.62155e-20	++	+	0.0309957
SL005168	-0.0055	0.0006	1.65974e-19	--	-	7.56e-24
SL000360	-0.0032	0.0003	1.68233e-19	--	-	1.13e-24
SL005201	0.0022	0.0002	1.79525e-19	++	+	0.781254
SL008381	0.004	0.0004	2.16474e-19	++	+	1.29e-44
SL004118	0.0038	0.0004	3.45523e-19	++	+	4.98e-06
SL000516	0.0062	0.0007	5.07704e-19	++	+	9.84e-24
SL003341	0.0042	0.0005	7.4745e-19	++	NA	NA
SL005188	0.006	0.0007	8.95138e-19	++	NA	NA
SL000521	0.011	0.0012	8.95212e-19	++	NA	NA
SL010516	-0.0165	0.0018	1.95273e-18	--	NA	NA
SL005184	0.0061	0.0007	4.4412e-18	++	+	0.783065
SL014292	0.0067	0.0008	1.01637e-17	++	NA	NA
SL016128	0.0042	0.0005	1.13382e-17	++	NA	NA
SL004149	0.0038	0.0004	1.40145e-17	++	+	1.76e-09
SL000320	0.0056	0.0006	1.48772e-17	++	NA	NA
SL010388	0.0067	0.0008	2.27465e-17	++	+	2.59e-74
SL004260	0.005	0.0006	2.60976e-17	++	-	0.0160839
SL000308	0.0038	0.0004	3.16042e-17	++	+	6.17e-08
SL003326	0.0091	0.0011	3.43523e-17	++	+	4.09e-36
SL003324	-0.0032	0.0004	4.57881e-17	--	-	2.23e-20
SL005233	0.0047	0.0006	6.24714e-17	++	+	1.31e-25
SL004712	0.0037	0.0004	7.85267e-17	++	-	0.878524
SL004209	0.0049	0.0006	8.99084e-17	++	+	0.0144626
SL004645	-0.0041	0.0005	1.6381e-16	--	-	8.55e-28
SL005158	0.0019	0.0002	4.41879e-16	++	-	0.000131215
SL002684	0.0035	0.0004	1.23566e-15	++	NA	NA
SL001990	0.0048	0.0006	1.59886e-15	++	+	0.00378547
SL000164	0.0041	0.0005	1.99411e-15	++	+	5.18e-09
SL000344	0.0049	0.0006	2.33049e-15	++	NA	NA
SL000319	0.0025	0.0003	3.01933e-15	++	NA	NA
SL001997	0.0029	0.0004	3.62717e-15	++	+	0.619172
SL007429	0.0032	0.0004	3.62717e-15	++	NA	NA
SL000474	0.0028	0.0003	4.09926e-15	++	+	0.662293
SL004400	0.0027	0.0003	4.72235e-15	++	NA	NA
SL008623	0.0045	0.0006	4.72329e-15	++	+	2.25e-07
SL003994	-0.0042	0.0005	5.60305e-15	--	NA	NA
SL004805	0.0027	0.0003	5.60305e-15	++	-	0.127723
SL012881	0.0035	0.0004	6.77173e-15	++	+	1.04e-28
SL008865	0.003	0.0004	7.89815e-15	++	+	0.00859042
SL000507	-0.0033	0.0004	9.38232e-15	--	NA	NA
SL000039	0.0046	0.0006	1.28057e-14	++	+	3.94e-07
SL001902	0.0031	0.0004	1.34544e-14	++	+	0.1038
SL002093	0.0051	0.0006	2.43138e-14	++	+	0.192831
SL008591	0.0081	0.001	3.07886e-14	++	+	4.75e-12
SL007306	0.0037	0.0005	3.12187e-14	++	+	4.3e-05
SL003703	0.0032	0.0004	3.30623e-14	++	+	2.62e-07
SL008574	0.0048	0.0006	3.66903e-14	++	-	1.26e-50
SL004660	0.0073	0.0009	3.94375e-14	++	-	7.83e-06
SL008835	0.0043	0.0006	4.14238e-14	++	+	0.148063
SL012774	0.0036	0.0005	4.62244e-14	++	-	0.934222
SL016969	0.0055	0.0007	5.24014e-14	++	+	8.05e-44
SL007173	0.0025	0.0003	5.7388e-14	++	+	8.5e-05
SL004865	-0.003	0.0004	6.57671e-14	--	NA	NA
SL007804	0.0042	0.0006	7.78559e-14	++	+	3.61e-11
SL005173	0.0022	0.0003	8.77159e-14	++	NA	NA
SL002519	-0.0023	0.0003	1.00486e-13	--	-	0.00221683
SL004298	0.0033	0.0004	1.10182e-13	++	+	0.929369
SL000357	0.0025	0.0003	1.18597e-13	++	NA	NA
SL000064	-0.0038	0.0005	1.59823e-13	--	-	3.9e-85
SL000497	0.0045	0.0006	1.84283e-13	++	+	5.7e-91
SL004208	0.0037	0.0005	1.90929e-13	++	+	2.15e-06
SL014009	0.0039	0.0005	2.51988e-13	++	+	8.45e-08
SL001797	0.0026	0.0003	3.03616e-13	++	-	0.263337
SL005231	0.0032	0.0004	3.36345e-13	++	NA	NA
SL005207	0.0035	0.0005	3.94604e-13	++	NA	NA
SL004180	0.0031	0.0004	4.25091e-13	++	-	0.695204
SL004733	0.0037	0.0005	4.71176e-13	++	+	0.00954825
SL010369	0.0031	0.0004	5.19916e-13	++	NA	NA
SL005221	0.004	0.0005	6.91939e-13	++	NA	NA
SL002762	0.0143	0.0019	7.27792e-13	++	+	8.22e-12
SL004673	0.0028	0.0004	1.14555e-12	++	-	0.00108673
SL010617	0.0074	0.001	1.36772e-12	++	+	7.67e-11
SL009210	0.0053	0.0007	1.37127e-12	++	+	1.53e-07
SL003179	0.0049	0.0007	2.03524e-12	++	+	2.31e-08
SL004347	0.0055	0.0008	2.46766e-12	++	+	0.177105
SL005488	0.0031	0.0004	3.21821e-12	++	+	8.81e-09
SL004671	-0.004	0.0006	3.26888e-12	--	NA	NA
SL003764	0.0024	0.0003	3.79668e-12	++	-	0.0360427
SL004126	0.0033	0.0005	4.93915e-12	++	NA	NA
SL005797	-0.0044	0.0006	4.9864e-12	--	-	8.98e-06
SL008639	0.0031	0.0004	1.15752e-11	++	NA	NA
SL000017	0.0074	0.0011	1.40168e-11	++	NA	NA
SL003167	0.005	0.0007	1.60701e-11	++	-	1.23e-24
SL002561	0.0043	0.0006	2.07932e-11	++	+	1.55e-05
SL007696	0.0024	0.0004	2.35727e-11	++	-	3.18e-15
SL003304	0.0019	0.0003	2.63283e-11	++	+	0.164444
SL008945	0.0132	0.0019	2.98055e-11	++	NA	NA
SL000458	0.0028	0.0004	3.21919e-11	++	+	0.72579
SL001728	0.0036	0.0005	4.26459e-11	++	+	0.732645
SL000408	0.0046	0.0007	4.58256e-11	++	+	0.0020484
SL011533	-0.0094	0.0014	5.23964e-11	--	-	5.42e-11
SL000558	-0.002	0.0003	5.90112e-11	--	-	7.35e-05
SL005102	0.0052	0.0008	6.89441e-11	++	NA	NA
SL005196	0.0022	0.0003	8.3705e-11	++	-	1.83e-05
SL004153	0.0032	0.0005	1.31682e-10	++	NA	NA
SL012783	-0.0036	0.0005	1.99618e-10	--	-	4.68e-10
SL011049	-0.002	0.0003	2.71289e-10	+-	-	1.78e-31
SL000254	0.0021	0.0003	3.30428e-10	++	NA	NA
SL003332	0.0031	0.0005	3.33186e-10	++	+	0.103033
SL008822	0.0032	0.0005	3.51097e-10	++	NA	NA
SL008936	0.0022	0.0003	3.73628e-10	++	NA	NA
SL004362	0.0036	0.0006	4.48265e-10	++	-	0.0495042
SL002505	0.0048	0.0007	4.64337e-10	++	+	1.98e-16
SL000437	0.006	0.0009	4.79877e-10	++	+	0.000126715
SL009054	0.0026	0.0004	6.96418e-10	++	-	0.0259007
SL000272	-0.0015	0.0002	9.74691e-10	--	-	5.7e-19
SL000640	0.003	0.0005	1.06572e-09	++	+	0.0753404
SL000424	0.0018	0.0003	1.13385e-09	++	NA	NA
SL008773	0.0029	0.0005	1.19021e-09	++	+	0.439699
SL003993	0.0024	0.0004	1.22947e-09	++	+	0.000266053
SL016566	-0.0029	0.0005	1.2764e-09	--	-	0.013462
SL010464	-0.0016	0.0003	1.39826e-09	--	-	0.000199001
SL004363	0.0038	0.0006	2.55725e-09	++	NA	NA
SL005160	0.0034	0.0005	3.16769e-09	++	NA	NA
SL006777	-0.003	0.0005	3.16769e-09	--	NA	NA
SL001815	-0.002	0.0003	3.43677e-09	--	-	3.06e-05
SL000441	0.0036	0.0006	4.31212e-09	++	+	0.0632416
SL004152	0.0027	0.0004	5.11835e-09	++	NA	NA
SL003679	0.0019	0.0003	5.80571e-09	++	NA	NA
SL006675	0.0025	0.0004	6.31856e-09	++	-	0.83748
SL021043	-0.0027	0.0005	6.74742e-09	--	-	1.93e-24
SL007327	0.0043	0.0007	6.86348e-09	++	NA	NA
SL004844	0.0029	0.0005	8.23565e-09	++	+	0.0475004
SL007674	0.0031	0.0005	8.43448e-09	++	+	0.25318
SL001947	0.0025	0.0004	8.75182e-09	++	-	4.05e-22
SL005153	0.0019	0.0003	1.12753e-08	++	NA	NA
SL000545	-0.0022	0.0004	1.13203e-08	--	NA	NA
SL009089	-0.003	0.0005	1.28835e-08	--	-	1.98e-35
SL003177	0.0022	0.0004	1.33845e-08	++	-	0.174204
SL004356	0.0045	0.0008	1.6858e-08	++	NA	NA
SL005491	-0.0023	0.0004	1.99265e-08	+-	NA	NA
SL003761	0.0042	0.0007	2.01811e-08	++	+	0.0240965
SL005171	0.0023	0.0004	2.01811e-08	++	NA	NA
SL010375	-0.0041	0.0007	2.04043e-08	--	-	7.84e-06
SL016554	0.0037	0.0006	2.62291e-08	++	+	0.4201
SL002706	0.0038	0.0007	2.62787e-08	++	-	3.3e-07
SL000616	-0.003	0.0005	2.62856e-08	--	-	1.49e-05
SL010471	-0.0022	0.0004	2.73709e-08	--	-	2.46e-18
SL005629	0.0038	0.0007	2.83312e-08	++	+	0.111142
SL008372	0.0027	0.0005	2.93469e-08	++	+	0.0280548
SL009790	0.002	0.0003	3.16463e-08	++	NA	NA
SL011769	0.0039	0.0007	3.24909e-08	++	+	4.1e-05
SL000045	-0.0027	0.0005	3.4832e-08	--	-	1.81e-08
SL004724	0.0024	0.0004	3.50365e-08	++	NA	NA
SL014268	0.0021	0.0004	3.62438e-08	++	-	0.112857
SL000462	0.0058	0.001	3.74028e-08	++	-	0.0753404
SL004159	0.0028	0.0005	4.50864e-08	++	-	0.0259015
SL004814	0.0025	0.0004	5.18909e-08	++	+	0.4322
SL007056	0.0028	0.0005	5.37127e-08	++	+	0.0027418
SL014070	0.0024	0.0004	6.3938e-08	++	-	0.062044
SL002621	0.0044	0.0008	6.52348e-08	++	+	1.14e-11
SL003176	0.0023	0.0004	6.96569e-08	++	-	0.0380496
SL003755	0.0034	0.0006	7.11507e-08	++	NA	NA
SL000314	-0.0037	0.0007	7.9306e-08	--	NA	NA
SL000089	0.0024	0.0004	8.32859e-08	++	+	3.18e-07
SL000321	0.0018	0.0003	9.87594e-08	++	NA	NA
SL003189	0.0039	0.0007	9.90286e-08	++	+	0.00197057
SL000415	0.0015	0.0003	1.00601e-07	++	+	0.831023
SL013490	-0.0022	0.0004	1.00719e-07	--	-	1.6e-23
SL010519	0.0028	0.0005	1.05449e-07	++	-	0.0418504
SL004639	0.002	0.0004	1.0753e-07	++	+	3.6e-06
SL000062	0.0056	0.001	1.08954e-07	++	+	9.61e-10
SL012108	-0.0024	0.0004	1.1323e-07	--	-	1.34e-05
SL008177	0.0016	0.0003	1.50987e-07	++	-	0.00481194
SL012707	0.0024	0.0004	1.74924e-07	++	NA	NA
SL003303	0.005	0.0009	1.89974e-07	++	+	2e-05
SL008193	0.0029	0.0005	2.03741e-07	++	NA	NA
SL012457	0.0026	0.0005	2.09852e-07	++	-	0.375504
SL010514	0.0039	0.0007	2.13927e-07	++	+	0.00840545
SL004635	0.0023	0.0004	2.19802e-07	++	+	0.98434
SL005572	0.0018	0.0003	2.39146e-07	++	NA	NA
SL000541	-0.0023	0.0004	2.58003e-07	--	NA	NA
SL001802	0.0025	0.0005	2.8869e-07	++	NA	NA
SL006131	0.0032	0.0006	2.91597e-07	++	+	4.52e-07
SL008588	0.0028	0.0005	3.07257e-07	++	NA	NA
SL011448	0.0027	0.0005	3.09031e-07	++	+	0.00452553
SL003328	0.0015	0.0003	3.2704e-07	++	+	1.89e-07
SL001880	0.0031	0.0006	3.48764e-07	++	NA	NA
SL006397	0.0018	0.0003	3.54351e-07	++	NA	NA
SL007453	0.0032	0.0006	4.41862e-07	++	NA	NA
SL000124	0.0017	0.0003	5.55479e-07	++	+	0.0532704
SL004081	0.0023	0.0004	5.58685e-07	++	+	9.85e-18
SL005352	0.0031	0.0006	5.58685e-07	++	+	0.464477
SL004726	0.0018	0.0004	6.41376e-07	++	NA	NA
SL000460	-0.0134	0.0026	6.54882e-07	--	NA	NA
SL000145	-0.0018	0.0004	6.69662e-07	--	-	2.88e-25
SL004146	0.0035	0.0007	8.19496e-07	-+	-	0.0563137
SL014228	0.0025	0.0005	8.88626e-07	++	-	0.467307
SL000280	0.0031	0.0006	9.66743e-07	++	+	0.00739066
SL005212	0.003	0.0006	1.0784e-06	++	-	0.00450819
SL004783	0.0034	0.0007	1.1261e-06	++	+	0.000138856
SL007181	0.0032	0.0006	1.12919e-06	++	-	0.00120017
SL008909	-0.002	0.0004	1.22769e-06	--	-	1.91e-06
SL011770	0.002	0.0004	1.3033e-06	++	-	0.958795
SL012822	0.0022	0.0004	1.3033e-06	++	-	7.57e-11
SL018971	0.0034	0.0007	1.43241e-06	++	+	0.934811
SL005190	0.0026	0.0005	1.44548e-06	++	+	0.0001018
SL016928	0.004	0.0008	1.53283e-06	++	+	0.177781
SL004142	0.0032	0.0006	1.63568e-06	++	+	1.18e-09
SL000011	0.0027	0.0005	1.81783e-06	++	+	1.12e-17
SL014129	0.0014	0.0003	2.10846e-06	++	-	7.63e-17
SL004908	0.0023	0.0005	2.22655e-06	++	-	0.11168
SL000055	0.0015	0.0003	2.45934e-06	++	NA	NA
SL003310	0.0048	0.001	2.52362e-06	++	NA	NA
SL001726	0.0036	0.0007	2.56876e-06	++	+	0.897036
SL004160	0.0015	0.0003	2.56876e-06	++	+	0.360409
SL005177	0.0051	0.001	2.67343e-06	++	NA	NA
SL000316	0.0025	0.0005	2.77091e-06	++	+	0.0154653
SL003685	0.0031	0.0006	3.10526e-06	++	+	0.000539459
SL004120	0.0027	0.0006	3.26358e-06	++	NA	NA
SL006922	0.0021	0.0004	3.45144e-06	++	-	0.0204855
SL015510	0.0048	0.001	3.47458e-06	++	+	0.154308
SL003774	0.0027	0.0005	3.55732e-06	++	-	0.806624
SL004145	0.0021	0.0004	3.62713e-06	++	+	0.182847
SL000586	-0.0079	0.0016	3.64405e-06	--	NA	NA
SL004492	0.0021	0.0004	3.64405e-06	++	+	0.0768509
SL005215	0.0032	0.0007	3.90611e-06	++	+	0.665172
SL004820	-0.0096	0.002	4.0272e-06	--	NA	NA
SL003916	0.003	0.0006	4.21276e-06	++	-	0.0363494
SL010460	0.0052	0.0011	4.30164e-06	++	+	3.15e-09
SL010451	0.0027	0.0006	4.49801e-06	++	+	7.53e-08
SL005361	0.0021	0.0004	4.52282e-06	++	NA	NA
SL009213	0.0038	0.0008	4.52282e-06	++	+	8.37e-10
SL000248	0.001	0.0002	5.03564e-06	++	NA	NA
SL003066	0.0014	0.0003	5.18262e-06	++	-	9.18e-08
SL010457	0.0024	0.0005	5.49954e-06	++	+	0.984426
SL000084	-0.0038	0.0008	6.5506e-06	--	-	0.000412909
SL010391	0.0021	0.0004	6.75368e-06	++	-	9.89e-07
SL000546	-0.0033	0.0007	6.77125e-06	--	-	1.74e-12
SL007022	0.0023	0.0005	7.03929e-06	++	-	0.669524
SL000070	-0.0025	0.0005	7.35531e-06	--	-	0.493287
SL011510	0.0022	0.0005	7.35531e-06	++	+	0.000400337
SL000485	0.0035	0.0007	8.3306e-06	++	+	3.04e-08
SL004804	0.002	0.0004	8.53576e-06	++	+	0.801601
SL001943	0.0023	0.0005	8.55199e-06	++	NA	NA
SL003196	0.0052	0.0011	8.74379e-06	++	+	2.34e-16
SL006915	0.0022	0.0005	8.94957e-06	++	+	0.429123
SL001729	0.0024	0.0005	9.9279e-06	-+	NA	NA
SL004829	0.0039	0.0008	1.04346e-05	++	NA	NA
SL000306	0.0034	0.0007	1.15733e-05	++	+	0.0364484
SL019979	0.0026	0.0006	1.21888e-05	++	+	2.12e-06
SL006705	0.0023	0.0005	1.30775e-05	++	+	0.0166802
SL005208	0.0021	0.0005	1.32122e-05	++	-	0.027416
SL004125	0.002	0.0004	1.40157e-05	++	+	0.0317223
SL003198	0.0023	0.0005	1.78406e-05	++	-	1.21e-13
SL002539	0.0024	0.0005	1.82373e-05	++	NA	NA
SL004690	0.0025	0.0006	1.98199e-05	++	+	0.892156
SL014735	0.0042	0.0009	2.00453e-05	++	+	0.533137
SL004147	0.0018	0.0004	2.22324e-05	++	+	0.388286
SL018900	-0.0067	0.0015	2.22324e-05	--	NA	NA
SL002782	0.0017	0.0004	2.29201e-05	++	+	0.0288182
SL002517	0.0024	0.0005	2.41487e-05	++	+	0.232776
SL005200	0.0031	0.0007	2.41487e-05	++	+	0.0943641
SL004821	0.0023	0.0005	2.56368e-05	++	+	4.52e-16
SL002524	0.0021	0.0005	2.62482e-05	++	+	0.0572305
SL004720	-0.0018	0.0004	2.67659e-05	+-	NA	NA
SL004852	0.0036	0.0008	2.68779e-05	++	+	0.829637
SL008644	-0.0027	0.0006	2.9393e-05	--	-	2.85e-10
SL010488	-0.0018	0.0004	2.9725e-05	--	-	2.29e-07
SL004899	0.0025	0.0006	3.27649e-05	++	NA	NA
SL000508	-0.002	0.0005	3.9199e-05	--	-	3.67e-13
SL000322	0.0015	0.0004	4.24581e-05	++	-	0.0205149
SL000249	0.0022	0.0005	4.60526e-05	++	NA	NA
SL008904	0.0019	0.0005	4.60526e-05	++	NA	NA
SL004364	0.002	0.0005	4.67076e-05	++	+	0.284877
SL004876	-0.0013	0.0003	4.84741e-05	--	-	2.09e-09
SL004661	0.0021	0.0005	4.88709e-05	++	-	0.0233509
SL000377	0.0035	0.0008	5.15129e-05	++	+	0.0596655
SL015728	0.0027	0.0006	5.16525e-05	++	+	0.36834
SL003930	0.0021	0.0005	5.78406e-05	++	+	0.00572765
SL004396	0.0056	0.0013	6.21283e-05	++	+	1.09e-11
SL000420	0.0058	0.0014	6.32622e-05	++	-	0.821363
SL000645	0.0029	0.0007	7.28999e-05	++	+	0.00607002
SL011535	0.0027	0.0007	8.45513e-05	++	+	4.53e-06
SL013548	0.0017	0.0004	8.96214e-05	++	-	0.0819791
SL013240	0.0038	0.0009	9.45066e-05	++	+	5.81e-08
SL004351	0.0022	0.0005	9.47444e-05	++	+	0.00815438
SL006830	0.002	0.0005	9.75071e-05	++	NA	NA
SL004859	0.0027	0.0007	0.000106438	++	-	0.295328
SL010454	0.0014	0.0003	0.000109381	++	-	0.52741
SL000581	0.0026	0.0006	0.000120761	++	NA	NA
SL017106	0.0024	0.0006	0.000126113	++	-	0.0258523
SL011404	0.0019	0.0005	0.000126444	++	+	0.0120125
SL011768	0.0029	0.0007	0.000137182	++	NA	NA
SL005223	0.0018	0.0004	0.000183452	++	-	3.57e-07
SL004739	0.0039	0.001	0.000185132	++	NA	NA
SL010508	0.0019	0.0005	0.000212745	++	-	0.0806477
SL003320	0.0025	0.0006	0.000234978	++	+	1.02e-10
SL000038	0.003	0.0008	0.000250131	++	NA	NA
SL013165	0.0022	0.0006	0.000250131	++	+	1.64e-12
SL000003	0.0017	0.0004	0.000254473	-+	NA	NA
SL005185	-0.0027	0.0007	0.000254473	--	-	7.52e-10
SL003793	0.002	0.0005	0.000259989	++	+	0.000130356
SL001691	0.0027	0.0007	0.000263091	++	+	0.000641794
SL001896	0.0014	0.0004	0.000266495	++	-	0.446327
SL004625	0.0019	0.0005	0.000270409	++	+	4.98e-06
SL000528	-0.0029	0.0007	0.00028528	--	+	0.532784
SL004891	0.0027	0.0007	0.000287315	++	+	0.000269321
SL007237	0.0021	0.0005	0.000292985	++	+	0.123172
SL007642	0.0019	0.0005	0.000293699	++	+	0.0784654
SL008122	-0.005	0.0013	0.000311255	--	NA	NA
SL000310	0.0014	0.0004	0.000328224	++	NA	NA
SL004759	0.0035	0.0009	0.000329638	++	+	8.04e-08
SL003184	0.0041	0.0011	0.000347277	++	+	1.06e-05
SL005169	0.0018	0.0005	0.000367674	++	NA	NA
SL005166	0.002	0.0005	0.000397228	++	+	0.00157072
SL003168	0.0018	0.0005	0.000423081	++	+	0.00357439
SL007640	0.0028	0.0007	0.000424295	++	NA	NA
SL001897	0.0027	0.0007	0.000439596	++	+	8.75e-07
SL007261	-0.0045	0.0012	0.000439596	--	NA	NA
SL018891	0.0019	0.0005	0.000439596	++	-	0.984426
SL010371	0.0014	0.0004	0.000451165	++	-	0.135783
SL004594	0.0033	0.0009	0.000457881	-+	NA	NA
SL000338	0.0026	0.0007	0.00048478	++	+	2.64e-05
SL000433	0.0041	0.0011	0.000491153	++	+	8.84e-06
SL014111	0.0016	0.0004	0.000503791	++	+	0.0282711
SL007153	-0.0025	0.0007	0.000552799	--	-	4.92e-21
SL008039	0.003	0.0008	0.000566023	++	+	0.00126119
SL010496	0.0015	0.0004	0.000596208	++	-	0.0528265
SL002525	0.0011	0.0003	0.000610546	++	NA	NA
SL014470	-0.0014	0.0004	0.000698602	--	NA	NA
SL000556	0.0021	0.0006	0.000712074	++	NA	NA
SL011629	-0.0028	0.0008	0.000712074	--	NA	NA
SL004486	0.0027	0.0007	0.000771431	++	+	3.16e-07
SL004875	0.0015	0.0004	0.000776148	++	+	4.1e-06
SL000396	-0.0019	0.0005	0.000791462	--	-	0.02212
SL000019	-0.0013	0.0004	0.000791688	--	NA	NA
SL006522	0.0022	0.0006	0.000819704	++	NA	NA
SL003739	0.0021	0.0006	0.000951862	++	+	0.00068618
SL008931	0.0043	0.0012	0.000951862	++	+	0.0475004
SL010517	0.0016	0.0005	0.00102246	++	-	0.00108218
SL002640	0.0021	0.0006	0.00107229	++	+	0.284877
SL004845	-0.0015	0.0004	0.00107905	+-	NA	NA
SL004940	0.0042	0.0012	0.00111108	++	NA	NA
SL004760	0.0032	0.0009	0.00113668	++	+	0.00126773
SL000509	0.0017	0.0005	0.0011491	++	-	0.0475409
SL001995	0.0033	0.0009	0.00116292	++	+	8.94e-07
SL004269	-0.0022	0.0006	0.00125755	+-	+	0.000832755
SL008416	0.0013	0.0004	0.00134991	++	-	0.0101684
SL003650	-0.0063	0.0018	0.00135294	--	NA	NA
SL005214	0.0009	0.0003	0.00136749	++	NA	NA
SL000440	0.0036	0.001	0.0014438	++	NA	NA
SL012698	0.0028	0.0008	0.00146697	++	NA	NA
SL000638	0.0022	0.0006	0.00149866	++	+	0.147603
SL001973	0.0014	0.0004	0.00156382	++	+	0.00271197
SL000001	0.0017	0.0005	0.00156834	++	-	0.0962672
SL010348	0.0012	0.0004	0.00167919	++	+	0.654884
SL007059	0.0014	0.0004	0.00168135	++	+	0.844882
SL017529	0.002	0.0006	0.00170123	++	NA	NA
SL000570	0.002	0.0006	0.00179283	++	NA	NA
SL008094	0.0021	0.0006	0.00180325	++	+	0.494205
SL004862	0.0014	0.0004	0.00180705	++	+	0.367062
SL004157	0.0023	0.0007	0.00191674	++	NA	NA
SL005234	0.0029	0.0009	0.00193837	++	+	0.78722
SL000087	0.0031	0.0009	0.00197981	++	+	4.13e-05
SL004714	-0.0011	0.0003	0.00201129	--	-	5.43e-08
SL004683	-0.0023	0.0007	0.00205712	--	NA	NA
SL004984	0.0016	0.0005	0.00207345	++	-	0.134592
SL004354	-0.0011	0.0003	0.00229982	--	-	3.25e-09
SL014229	0.0021	0.0006	0.00229982	++	NA	NA
SL005194	0.003	0.0009	0.00230522	++	+	0.0287824
SL007471	-0.0015	0.0005	0.00239634	--	-	1.41e-08
SL003653	0.0021	0.0006	0.00247282	++	+	0.000180964
SL007871	-0.0015	0.0004	0.00256285	--	NA	NA
SL010520	0.0013	0.0004	0.00259281	++	-	0.00794368
SL004939	0.0019	0.0006	0.00265936	++	-	0.0346174
SL005210	0.0014	0.0004	0.00267988	++	-	3.72e-24
SL007310	-0.0039	0.0012	0.00269803	--	NA	NA
SL005263	0.0024	0.0007	0.00274123	++	+	3.92e-07
SL016130	0.0018	0.0005	0.00279111	++	NA	NA
SL008933	0.0023	0.0007	0.00300913	++	NA	NA
SL000271	-0.0014	0.0004	0.00307427	--	NA	NA
SL000309	0.0022	0.0007	0.00309611	++	NA	NA
SL002722	0.0016	0.0005	0.00317218	++	+	0.936269
SL014469	0.003	0.0009	0.00319152	++	+	0.0007181
SL020171	0.0024	0.0008	0.00323333	++	+	0.522321
SL006448	0.0015	0.0005	0.00326375	++	NA	NA
SL004154	0.0013	0.0004	0.00326486	++	+	0.00015237
SL007280	0.0013	0.0004	0.00333774	++	+	0.687956
SL004438	-0.0018	0.0006	0.00340141	--	NA	NA
SL003186	0.0018	0.0006	0.00347604	++	+	0.0764745
SL001753	0.0019	0.0006	0.003479	++	NA	NA
SL005205	0.0015	0.0005	0.00357107	++	+	0.858057
SL004327	0.0016	0.0005	0.00360499	++	-	0.0124109
SL002763	0.0018	0.0006	0.00362992	++	+	0.597845
SL006550	-0.0011	0.0003	0.00372569	+-	NA	NA
SL000572	0.0062	0.002	0.00382998	++	NA	NA
SL007673	-0.0013	0.0004	0.00384115	--	-	0.000270424
SL006372	0.0025	0.0008	0.00386551	++	+	0.419415
SL000074	0.0013	0.0004	0.00392281	++	NA	NA
SL000467	0.0013	0.0004	0.00397332	++	NA	NA
SL005392	0.0019	0.0006	0.00414872	++	NA	NA
SL002792	-0.0042	0.0014	0.00436952	--	+	0.165835
SL003951	0.0029	0.0009	0.00444308	++	+	2.78e-30
SL000836	-0.0026	0.0008	0.00448365	--	NA	NA
SL000622	0.0015	0.0005	0.00475148	++	NA	NA
SL004183	-0.0009	0.0003	0.00475148	+-	-	7.82e-17
SL004915	-0.0045	0.0015	0.00484128	--	NA	NA
SL012754	-0.0017	0.0006	0.00493946	+-	+	0.708619
SL004921	-0.0043	0.0014	0.0049464	--	+	0.225326
SL000268	-0.0012	0.0004	0.00511323	--	-	2.48e-08
SL004070	0.0017	0.0006	0.00514359	++	+	0.905237
SL000601	-0.0006	0.0002	0.00533108	--	-	3.18e-12
SL003753	-0.0028	0.0009	0.00584806	--	+	0.603
SL006992	0.0013	0.0004	0.00584806	++	NA	NA
SL005165	0.0019	0.0006	0.00610205	++	+	0.000301905
SL006713	0.0019	0.0006	0.00618617	++	-	0.607605
SL004516	0.0028	0.0009	0.00660113	-+	-	3.32e-27
SL000496	-0.0018	0.0006	0.0066351	--	-	0.0358435
SL004139	-0.0011	0.0004	0.00667534	--	-	3.87e-06
SL014028	0.0012	0.0004	0.0070896	++	-	0.11451
SL010384	0.0014	0.0005	0.00713322	++	+	0.0243097
SL006924	-0.0013	0.0004	0.0074691	--	-	6.84e-65
SL000342	0.0021	0.0007	0.00754496	++	-	0.00284654
SL001721	0.0013	0.0004	0.00754496	++	-	0.129389
SL007250	0.0016	0.0006	0.00754496	++	-	0.0465642
SL010928	0.0017	0.0006	0.00754496	++	+	0.923417
SL003687	0.0017	0.0006	0.00763365	++	+	0.658057
SL003170	0.002	0.0007	0.00763813	++	+	0.970948
SL004580	-0.0015	0.0005	0.00804483	--	NA	NA
SL014093	0.0015	0.0005	0.0081553	++	-	0.46588
SL004536	0.0052	0.0018	0.00823201	++	-	0.55849
SL007311	0.0034	0.0012	0.00850028	++	-	0.229455
SL008967	0.0042	0.0015	0.00850125	++	-	0.689631
SL003704	0.0026	0.0009	0.008523	++	+	3.88e-22
SL004304	-0.0014	0.0005	0.00854676	+-	NA	NA
SL009431	0.0026	0.0009	0.00874032	++	+	0.000442187
SL012168	0.0015	0.0005	0.00904081	++	NA	NA
SL005846	0.0017	0.0006	0.00929905	++	NA	NA
SL000605	0.0028	0.001	0.00938534	++	+	0.0528265
SL005164	0.0018	0.0006	0.00962369	++	+	0.00432846
SL013754	-0.0019	0.0007	0.0100052	--	-	0.0619128
SL000515	0.0014	0.0005	0.0101761	++	NA	NA
SL004718	0.0012	0.0004	0.0101908	++	-	0.837423
SL002756	0.002	0.0007	0.0105369	++	NA	NA
SL003193	-0.0013	0.0005	0.0107144	--	-	1.28e-53
SL000598	0.0024	0.0009	0.0107383	++	+	2.07e-05
SL004345	0.0012	0.0004	0.0111695	++	NA	NA
SL000588	0.0014	0.0005	0.0114956	++	+	0.57334
SL010500	-0.0042	0.0015	0.0115852	--	+	0.0767508
SL010349	0.0021	0.0008	0.0116948	++	NA	NA
SL016555	-0.0025	0.0009	0.0117616	--	NA	NA
SL005204	0.0023	0.0008	0.01201	++	NA	NA
SL003199	0.001	0.0004	0.0120116	-+	-	1.67e-07
SL018587	-0.0011	0.0004	0.0123112	--	-	6.91e-12
SL003080	0.0018	0.0007	0.0127426	++	NA	NA
SL008071	0.0016	0.0006	0.0127851	++	+	1.33e-14
SL014209	0.0018	0.0007	0.0131263	++	+	0.210747
SL005256	0.0022	0.0008	0.0136625	++	-	0.920479
SL004339	0.0019	0.0007	0.0138154	++	+	0.00197194
SL000048	-0.001	0.0004	0.0139199	+-	NA	NA
SL014069	-0.0015	0.0005	0.0142014	--	-	0.11701
SL006998	-0.0034	0.0013	0.0146034	--	NA	NA
SL007651	0.0018	0.0007	0.0148532	++	+	0.479629
SL000540	0.0016	0.0006	0.0149337	++	+	0.210797
SL005155	0.004	0.0015	0.0150595	++	-	0.975826
SL000597	0.0015	0.0006	0.0153099	++	-	0.308956
SL003362	0.0011	0.0004	0.0153099	++	NA	NA
SL007888	0.002	0.0008	0.0155607	++	NA	NA
SL001737	0.0014	0.0005	0.0162635	++	-	0.400603
SL000526	-0.0015	0.0006	0.0162861	+-	NA	NA
SL003309	0.0008	0.0003	0.0164036	++	NA	NA
SL019096	0.0012	0.0004	0.0164036	++	NA	NA
SL005222	0.0024	0.0009	0.0165178	++	NA	NA
SL007223	0.0017	0.0006	0.0166376	++	NA	NA
SL000573	0.001	0.0004	0.0168018	++	+	0.747391
SL003187	0.0016	0.0006	0.0174953	++	-	9.42e-07
SL002650	-0.0041	0.0016	0.0175586	--	NA	NA
SL005181	0.0015	0.0006	0.0177344	++	NA	NA
SL014294	0.0015	0.0006	0.018658	++	NA	NA
SL000530	0.0011	0.0004	0.0208702	++	-	0.1038
SL004850	0.0018	0.0007	0.0210132	++	-	0.0248184
SL003646	-0.0039	0.0016	0.021426	--	NA	NA
SL005179	0.0017	0.0007	0.0219146	++	+	0.418738
SL004008	0.0014	0.0006	0.0222286	-+	NA	NA
SL001796	0.0014	0.0005	0.02283	-+	-	1.38e-16
SL010490	-0.0012	0.0005	0.022873	--	-	0.000371811
SL001761	0.0013	0.0005	0.0228777	++	+	0.0488695
SL007242	0.0018	0.0007	0.0232649	++	-	0.598528
SL004768	0.0015	0.0006	0.02474	++	-	0.821325
SL004855	0.0008	0.0003	0.02478	++	NA	NA
SL007560	0.0013	0.0005	0.0248009	++	-	0.164336
SL010379	-0.0014	0.0006	0.0249549	--	-	5.59e-05
SL006917	-0.004	0.0016	0.0250338	--	+	0.124367
SL010927	-0.0034	0.0014	0.0250338	--	NA	NA
SL000553	-0.0046	0.0018	0.0254708	--	+	0.00226861
SL017289	0.0012	0.0005	0.0256418	++	-	0.00374905
SL007266	0.0017	0.0007	0.0259822	++	+	1.15e-07
SL004155	0.0022	0.0009	0.0261897	++	+	0.679241
SL003658	-0.004	0.0016	0.0264907	--	NA	NA
SL009328	0.0015	0.0006	0.0267344	++	+	0.291182
SL004910	-0.0018	0.0007	0.0270525	--	-	0.0877649
SL010469	-0.0011	0.0004	0.0272198	--	-	9.66e-07
SL000057	0.001	0.0004	0.0272742	++	-	0.509082
SL004864	0.0018	0.0007	0.0275154	++	NA	NA
SL003440	0.001	0.0004	0.0276253	++	NA	NA
SL005358	0.0021	0.0009	0.0276789	++	NA	NA
SL000584	0.0019	0.0008	0.028421	++	+	2.12e-09
SL000401	0.0017	0.0007	0.0290495	++	NA	NA
SL000134	0.0007	0.0003	0.0298618	++	-	1.34e-13
SL005574	-0.002	0.0008	0.0299489	--	NA	NA
SL008176	0.0018	0.0007	0.0299619	++	+	0.000289442
SL005236	0.0013	0.0006	0.0299932	++	+	0.151364
SL004466	-0.0009	0.0004	0.0305597	+-	NA	NA
SL000542	0.0026	0.0011	0.0311061	++	NA	NA
SL002086	-0.004	0.0017	0.0314301	--	NA	NA
SL004704	0.0015	0.0006	0.0319186	++	+	0.707851
SL000589	-0.0022	0.0009	0.0322589	+-	+	0.000106295
SL000551	-0.0041	0.0017	0.0334045	--	+	0.0164722
SL005261	0.0011	0.0005	0.0337601	++	-	0.627185
SL000550	0.0086	0.0036	0.0340964	-+	NA	NA
SL017188	-0.0032	0.0014	0.0342676	--	NA	NA
SL010489	0.0013	0.0006	0.0346022	++	-	0.136282
SL004752	0.0009	0.0004	0.0355182	++	-	0.873159
SL003690	0.0013	0.0005	0.0355776	++	NA	NA
SL013570	0.0008	0.0004	0.0383405	++	-	2.2e-07
SL005793	-0.0041	0.0018	0.0385234	--	NA	NA
SL008023	0.0013	0.0006	0.0385234	++	-	0.0473167
SL000358	0.0011	0.0005	0.0396624	++	NA	NA
SL000557	0.0017	0.0008	0.0400585	++	+	3.35e-06
SL010372	0.0013	0.0005	0.0405616	++	+	0.0106702
SL003711	-0.0034	0.0015	0.0407035	--	+	0.0351787
SL004860	0.0014	0.0006	0.0412403	++	+	0.00178268
SL003173	0.0022	0.001	0.0417576	++	+	2.79e-05
SL002522	-0.0014	0.0006	0.0426678	+-	-	2.31e-07
SL010521	-0.0041	0.0018	0.0441302	--	NA	NA
SL001791	-0.002	0.0009	0.044427	+-	-	9.13e-07
SL004078	0.002	0.0009	0.0446159	++	+	1.37e-09
SL004338	-0.001	0.0004	0.0456063	+-	+	0.968989
SL003461	0.0016	0.0007	0.0464694	++	+	0.285061
SL003172	0.0023	0.001	0.046477	++	NA	NA
SL006512	0.0014	0.0006	0.0480287	++	NA	NA
SL004131	-0.001	0.0005	0.0492079	--	-	0.290981
SL007281	0.0018	0.0008	0.0492079	++	NA	NA
SL012469	-0.0016	0.0007	0.0502547	+-	-	0.000549053
SL000523	0.0014	0.0006	0.0507161	++	-	0.0394348
SL010616	0.002	0.0009	0.0543846	++	+	4.27e-16
SL010373	0.0014	0.0006	0.0546983	++	-	0.000377355
SL011530	0.0029	0.0014	0.0553628	++	NA	NA
SL006091	0.0017	0.0008	0.0566049	++	NA	NA
SL016129	0.0009	0.0004	0.0567741	++	NA	NA
SL004477	0.0019	0.0009	0.0570829	++	+	0.0169985
SL004119	0.001	0.0005	0.0579854	++	NA	NA
SL011772	0.0017	0.0008	0.0591126	++	+	0.143104
SL000313	0.002	0.0009	0.0592077	++	NA	NA
SL017328	0.0023	0.0011	0.0595639	++	+	1.02e-10
SL005688	-0.0023	0.0011	0.0598843	--	+	0.0286527
SL006374	-0.0014	0.0007	0.0610202	--	-	0.0363494
SL000049	0.0007	0.0004	0.0610429	++	NA	NA
SL008703	0.001	0.0005	0.0611349	++	NA	NA
SL004248	0.0013	0.0006	0.0627317	++	+	0.154308
SL010518	-0.0028	0.0013	0.0632013	--	NA	NA
SL005229	0.0017	0.0008	0.0645496	++	-	0.604045
SL006460	0.0009	0.0004	0.0677554	-+	-	2.57e-17
SL000493	0.0013	0.0006	0.0686983	++	+	0.00400218
SL004856	0.0008	0.0004	0.0692606	++	-	0.088206
SL006406	0.0007	0.0004	0.0703364	-+	-	0.00208001
SL010502	0.0023	0.0011	0.0704323	++	+	0.0702007
SL000448	-0.003	0.0015	0.0704893	+-	NA	NA
SL002655	0.0015	0.0008	0.0704893	++	+	0.495012
SL004359	-0.001	0.0005	0.0704893	--	-	4.63e-05
SL005174	0.0014	0.0007	0.0704893	++	NA	NA
SL000655	0.0014	0.0007	0.0705673	++	+	0.0468259
SL003785	0.003	0.0015	0.0705771	++	NA	NA
SL005308	0.0017	0.0009	0.0721155	++	+	1.32e-05
SL004654	0.0013	0.0006	0.0723851	++	-	0.468269
SL007145	0.0015	0.0007	0.0723851	++	+	0.243739
SL016548	0.0014	0.0007	0.0732383	++	+	0.0411099
SL008522	0.001	0.0005	0.0759987	++	+	0.829658
SL004648	0.0017	0.0008	0.0765413	++	+	0.393669
SL015046	0.0008	0.0004	0.07715	-+	NA	NA
SL005178	-0.0009	0.0005	0.0774541	--	-	0.00708044
SL004643	0.0015	0.0008	0.0791358	++	+	1.96e-05
SL007373	-0.0036	0.0018	0.0800912	--	NA	NA
SL006913	-0.0023	0.0012	0.0817652	--	NA	NA
SL010455	0.0009	0.0004	0.0829492	++	+	0.000649116
SL004869	-0.0032	0.0017	0.0839296	+-	NA	NA
SL004920	0.0016	0.0008	0.0843896	++	+	0.126148
SL006528	0.0007	0.0004	0.0843982	++	-	0.569191
SL009216	-0.001	0.0005	0.0856728	+-	+	0.631784
SL003104	0.0012	0.0006	0.0866503	++	+	0.58437
SL007025	0.0015	0.0008	0.0866503	-+	NA	NA
SL000468	-0.0019	0.001	0.0876018	+-	NA	NA
SL005199	0.0023	0.0012	0.0882028	-+	NA	NA
SL014488	-0.0027	0.0014	0.0885706	--	NA	NA
SL014094	0.001	0.0005	0.0890863	++	-	0.00426895
SL003717	0.0008	0.0004	0.0898152	++	-	0.547478
SL005575	0.0014	0.0007	0.0909051	++	+	0.102804
SL004080	0.0008	0.0004	0.0911359	++	NA	NA
SL001716	0.0015	0.0008	0.0927641	++	+	0.308956
SL004742	-0.0007	0.0004	0.0928277	+-	NA	NA
SL008590	0.0013	0.0007	0.0938754	++	NA	NA
SL005170	0.0013	0.0007	0.0940194	++	NA	NA
SL013872	0.0008	0.0004	0.0952757	+-	NA	NA
SL004097	-0.0018	0.001	0.0956627	--	NA	NA
SL000449	-0.0019	0.001	0.0987258	--	-	0.622589
SL007049	0.0018	0.001	0.0997759	++	+	0.777031
SL004924	-0.0029	0.0016	0.100856	+-	NA	NA
SL009045	0.002	0.0011	0.10273	++	+	2.06e-08
SL000442	0.0017	0.0009	0.104161	++	+	0.0279384
SL007953	0.0013	0.0007	0.104615	++	+	0.00232458
SL004060	0.0007	0.0004	0.106721	++	NA	NA
SL000346	0.0012	0.0006	0.108465	+-	+	2.42e-07
SL004297	0.0013	0.0007	0.108541	++	+	0.465757
SL000339	0.0017	0.0009	0.109487	++	+	0.143647
SL004457	0.0016	0.0009	0.110077	++	NA	NA
SL000142	0.0012	0.0007	0.110392	++	NA	NA
SL009202	0.0011	0.0006	0.114437	++	+	0.113129
SL004326	0.0007	0.0004	0.115341	++	-	0.167423
SL009988	0.0012	0.0007	0.115341	++	-	0.596523
SL004489	0.0012	0.0007	0.115504	++	+	0.952135
SL006378	0.0019	0.0011	0.115698	+-	+	0.287464
SL010830	-0.0019	0.001	0.117106	--	NA	NA
SL004343	0.0011	0.0006	0.121927	++	NA	NA
SL000617	0.0009	0.0005	0.124982	++	NA	NA
SL011405	-0.0027	0.0015	0.130036	--	NA	NA
SL016563	0.0009	0.0005	0.130052	++	-	0.985678
SL014269	0.0019	0.0011	0.135422	++	+	0.000173259
SL006088	-0.0028	0.0016	0.136208	--	NA	NA
SL004751	0.0013	0.0007	0.136423	++	+	4.93e-06
SL002662	-0.0007	0.0004	0.136985	+-	NA	NA
SL003915	0.0008	0.0005	0.140344	++	-	0.0151819
SL006803	0.001	0.0006	0.141657	++	NA	NA
SL002705	0.0027	0.0016	0.143757	++	NA	NA
SL003680	-0.0016	0.0009	0.143976	--	-	8.16e-15
SL014288	-0.0007	0.0004	0.144164	--	-	0.532784
SL001945	-0.0011	0.0006	0.144224	--	+	0.624015
SL004642	0.0013	0.0008	0.144224	-+	-	0.36367
SL004670	-0.0011	0.0006	0.146261	+-	-	0.0444741
SL001999	0.0012	0.0007	0.149857	++	NA	NA
SL005725	-0.001	0.0006	0.149857	+-	-	0.394509
SL006108	0.0013	0.0008	0.149857	++	NA	NA
SL004588	-0.0009	0.0005	0.150052	+-	NA	NA
SL004009	-0.0025	0.0015	0.152739	--	NA	NA
SL003178	0.0009	0.0006	0.153537	++	-	0.49721
SL000020	0.0011	0.0007	0.155281	+-	+	8.9e-15
SL011180	0.0009	0.0006	0.156958	++	-	0.000766369
SL018938	0.0018	0.0011	0.161113	++	NA	NA
SL003043	0.0021	0.0013	0.161541	++	NA	NA
SL011071	0.0014	0.0009	0.163824	++	NA	NA
SL010328	-0.0005	0.0003	0.164247	+-	NA	NA
SL004144	0.0009	0.0005	0.164937	++	+	0.104517
SL005206	0.0009	0.0006	0.164937	++	+	6.33e-06
SL008421	0.0011	0.0007	0.167513	++	+	0.145488
SL008956	-0.001	0.0006	0.16993	+-	-	0.00442656
SL002783	0.0008	0.0005	0.174951	++	-	0.740974
SL005675	0.001	0.0007	0.175819	++	-	0.00557991
SL007272	0.001	0.0006	0.179137	++	+	0.00905765
SL004064	0.0009	0.0006	0.179691	++	NA	NA
SL007136	0.0008	0.0005	0.182079	++	NA	NA
SL007756	-0.0011	0.0007	0.183392	+-	NA	NA
SL004649	0.001	0.0007	0.184245	++	+	0.083335
SL010510	0.001	0.0007	0.186467	++	-	0.22696
SL011616	0.0012	0.0007	0.186857	++	-	0.419415
SL005227	0.0014	0.0009	0.187247	++	+	0.34303
SL017424	0.0008	0.0005	0.188698	++	+	0.22696
SL011529	-0.0023	0.0015	0.190753	--	NA	NA
SL004367	0.0016	0.0011	0.192959	++	+	2.38e-09
SL010973	0.001	0.0006	0.192959	++	+	0.801601
SL012188	0.0013	0.0009	0.192959	++	+	6.29e-07
SL000414	0.0005	0.0003	0.196508	++	+	0.770978
SL005219	0.0054	0.0036	0.19824	++	+	0.0528265
SL007195	0.0009	0.0006	0.198312	+-	+	0.0843121
SL004652	0.0005	0.0003	0.199737	-+	NA	NA
SL000130	0.001	0.0007	0.204014	++	+	0.622589
SL005189	-0.0009	0.0006	0.205729	--	+	0.677912
SL019978	0.001	0.0007	0.20774	++	+	0.373265
SL016549	-0.0018	0.0012	0.20825	--	+	0.371658
SL004133	0.0007	0.0005	0.208758	++	NA	NA
SL002922	0.0012	0.0008	0.209116	++	NA	NA
SL000615	0.0012	0.0008	0.209324	++	NA	NA
SL005225	-0.0011	0.0007	0.209382	+-	+	0.655516
SL014088	0.001	0.0007	0.210036	++	-	0.946733
SL007806	0.0011	0.0007	0.211877	++	NA	NA
SL003192	0.0003	0.0002	0.212378	++	-	6.3e-05
SL003520	0.0008	0.0005	0.212581	++	+	0.373265
SL006132	0.0009	0.0006	0.212783	++	+	0.112604
SL005493	0.001	0.0007	0.214317	++	NA	NA
SL004366	0.0012	0.0008	0.21703	++	+	0.237503
SL011202	-0.0019	0.0013	0.218113	--	NA	NA
SL003349	0.001	0.0007	0.221406	++	+	0.0305906
SL004938	0.0012	0.0009	0.22326	++	NA	NA
SL005226	0.001	0.0007	0.22326	++	NA	NA
SL005588	-0.0021	0.0014	0.227565	--	NA	NA
SL010449	0.0005	0.0004	0.233622	++	NA	NA
SL000603	0.0009	0.0006	0.235852	++	+	5.34e-19
SL001713	0.001	0.0007	0.239982	++	+	0.00659729
SL004757	-0.0019	0.0014	0.243224	--	-	0.469547
SL013989	0.0009	0.0006	0.244559	++	NA	NA
SL002071	0.001	0.0007	0.244868	++	+	0.475277
SL010374	-0.0017	0.0012	0.245031	--	NA	NA
SL018629	0.0007	0.0005	0.25175	++	-	0.00600765
SL004723	0.0008	0.0006	0.252778	+-	-	0.799517
SL001731	0.0011	0.0008	0.254095	+-	+	0.000165062
SL003655	-0.0014	0.0011	0.258603	--	+	0.562864
SL010393	0.0012	0.0009	0.261795	++	+	0.240799
SL008331	-0.0017	0.0012	0.264112	--	NA	NA
SL010528	0.0015	0.0011	0.266265	++	+	0.00251448
SL011211	-0.0021	0.0016	0.266265	--	NA	NA
SL011509	0.0007	0.0005	0.266265	++	+	1.48e-05
SL004469	0.0015	0.0012	0.266835	++	+	0.0151175
SL008808	0.0011	0.0008	0.267836	++	+	0.0585145
SL000252	0.0007	0.0005	0.268394	++	NA	NA
SL002565	0.0011	0.0008	0.268394	++	+	0.00210932
SL000470	0.0009	0.0007	0.268959	++	+	0.0679322
SL003863	0.0008	0.0006	0.269954	+-	+	0.696291
SL016828	-0.0012	0.0009	0.270086	+-	NA	NA
SL010513	-0.0019	0.0014	0.271507	+-	+	0.0396532
SL005258	0.0009	0.0007	0.274767	++	+	0.687059
SL018921	0.0012	0.0009	0.274767	++	+	0.313388
SL000563	-0.0019	0.0014	0.275749	--	+	4.43e-08
SL004346	0.0008	0.0006	0.277727	+-	+	0.51466
SL002803	0.0011	0.0008	0.27842	++	NA	NA
SL000455	0.0006	0.0005	0.280652	+-	-	2.9e-05
SL004812	-0.0015	0.0012	0.280652	--	+	0.540872
SL011508	0.0014	0.0011	0.280772	++	NA	NA
SL004296	-0.0014	0.0011	0.283301	--	-	0.111142
SL003803	-0.0006	0.0004	0.286107	+-	NA	NA
SL004128	0.0008	0.0006	0.287493	++	-	0.754036
SL006892	0.0007	0.0006	0.287604	++	+	0.00392567
SL007356	0.001	0.0008	0.28828	++	NA	NA
SL007531	0.0008	0.0006	0.289377	++	NA	NA
SL000076	-0.0012	0.0009	0.29005	--	+	0.439505
SL000104	0.001	0.0008	0.293252	++	+	0.573296
SL007229	0.0009	0.0008	0.299539	++	+	0.915859
SL004771	0.001	0.0008	0.300339	++	-	0.046429
SL000398	0.001	0.0008	0.301513	++	+	0.000117525
SL008102	-0.001	0.0008	0.301513	--	-	0.266666
SL007358	0.0013	0.001	0.302123	++	NA	NA
SL011588	0.001	0.0008	0.302123	++	+	0.0232448
SL000345	0.0008	0.0007	0.306774	++	+	0.298266
SL004063	0.0008	0.0006	0.306774	+-	+	0.514788
SL007122	0.0009	0.0008	0.307699	++	+	0.853254
SL004067	0.0007	0.0005	0.308344	+-	+	0.686103
SL000006	0.0015	0.0012	0.310099	++	+	2.07e-07
SL003171	0.0009	0.0008	0.31074	++	+	0.402183
SL012248	0.0008	0.0006	0.311935	+-	NA	NA
SL007221	0.0015	0.0012	0.319777	++	+	0.0033026
SL004605	0.0007	0.0006	0.320821	++	NA	NA
SL010459	0.0038	0.0032	0.321448	-+	+	0.088253
SL000566	0.0004	0.0004	0.321521	+-	NA	NA
SL000007	0.0007	0.0006	0.32256	++	NA	NA
SL000426	0.0009	0.0007	0.322978	+-	NA	NA
SL000674	0.0008	0.0006	0.322978	++	+	0.522321
SL011406	0.0008	0.0007	0.3236	++	+	0.042167
SL000337	-0.0013	0.0011	0.324701	--	NA	NA
SL002036	-0.0012	0.001	0.324701	--	+	0.595555
SL000138	0.0007	0.0006	0.327649	++	NA	NA
SL007151	-0.0008	0.0007	0.333193	+-	NA	NA
SL000021	0.0007	0.0006	0.334953	+-	+	0.55799
SL004782	0.0005	0.0004	0.334953	-+	-	2.43e-42
SL008378	0.0012	0.001	0.336786	++	+	0.00137771
SL011532	0.0007	0.0006	0.336978	-+	-	0.55799
SL004866	0.0011	0.0009	0.337306	-+	+	0.472977
SL004068	0.0006	0.0005	0.338995	++	-	0.072792
SL005250	0.0007	0.0006	0.343263	+-	-	0.897123
SL014108	-0.0006	0.0006	0.345213	--	NA	NA
SL000483	0.0007	0.0006	0.350008	++	NA	NA
SL010522	0.0008	0.0007	0.35249	++	-	0.046306
SL006197	0.0007	0.0006	0.352935	++	+	0.0660303
SL000590	-0.0003	0.0003	0.3619	+-	NA	NA
SL010493	0.001	0.0009	0.362499	-+	NA	NA
SL010610	0.0005	0.0005	0.362499	+-	+	0.419415
SL011628	0.0008	0.0007	0.363741	++	+	0.000185486
SL004919	0.0011	0.001	0.370502	-+	+	0.338871
SL007385	0.001	0.0009	0.371061	+-	+	0.137285
SL004716	0.0006	0.0005	0.380489	++	NA	NA
SL005630	0.001	0.001	0.380777	++	+	0.0733096
SL008143	-0.0013	0.0012	0.380777	--	+	0.487513
SL004811	0.0009	0.0008	0.382797	+-	NA	NA
SL020172	0.0007	0.0006	0.382938	+-	+	0.439505
SL002695	0.0008	0.0008	0.385085	++	-	0.852782
SL005161	-0.0005	0.0005	0.386961	+-	NA	NA
SL005703	-0.0002	0.0002	0.388966	--	-	5.7e-31
SL002541	0.0005	0.0005	0.389368	-+	NA	NA
SL006911	0.0004	0.0004	0.389368	++	-	0.062044
SL005372	-0.0015	0.0014	0.391896	--	+	0.00175788
SL003990	0.0009	0.0009	0.392958	++	-	0.962347
SL004853	0.0009	0.0009	0.394017	++	-	0.394794
SL007024	0.0008	0.0008	0.396533	++	NA	NA
SL003305	-0.0008	0.0008	0.396917	--	+	0.589742
SL005197	0.0007	0.0007	0.396917	++	+	0.00291465
SL010368	0.0007	0.0006	0.399291	++	-	0.0105311
SL000554	0.0007	0.0007	0.404169	++	NA	NA
SL004765	-0.001	0.001	0.405342	+-	+	0.0600245
SL010515	-0.0012	0.0012	0.407831	--	NA	NA
SL004333	-0.0006	0.0006	0.408999	--	+	0.970948
SL004644	0.0004	0.0004	0.409111	++	-	0.000182246
SL008759	0.0011	0.0011	0.413012	-+	NA	NA
SL010466	0.0008	0.0008	0.413012	++	NA	NA
SL010376	-0.0006	0.0006	0.413645	+-	+	0.525036
SL000158	0.001	0.001	0.413752	-+	+	0.292191
SL008611	0.0009	0.0009	0.414906	-+	+	0.00753977
SL003800	0.0006	0.0006	0.423904	+-	+	0.0147736
SL014096	0.0006	0.0006	0.424654	+-	NA	NA
SL004851	0.0006	0.0007	0.427229	-+	NA	NA
SL000517	0.0006	0.0006	0.43002	+-	+	0.00796506
SL003792	-0.0013	0.0014	0.43002	--	+	6.94e-05
SL008063	-0.0015	0.0015	0.430501	-+	+	0.0666821
SL014188	0.0006	0.0006	0.43267	++	NA	NA
SL000560	0.0007	0.0007	0.432758	+-	+	9.94e-17
SL004610	-0.0004	0.0004	0.440319	--	-	0.0394348
SL010491	0.0007	0.0007	0.440319	++	+	0.607605
SL004360	0.0005	0.0005	0.440916	+-	-	0.393594
SL000384	0.0008	0.0008	0.450306	+-	NA	NA
SL000524	0.0005	0.0005	0.451022	-+	NA	NA
SL004353	0.0006	0.0006	0.453543	++	+	0.379875
SL007752	0.0007	0.0007	0.456186	++	+	0.00262736
SL011808	-0.0014	0.0015	0.456186	--	+	0.00204902
SL013488	-0.001	0.0011	0.456186	--	NA	NA
SL004591	-0.0006	0.0007	0.459721	+-	+	0.52412
SL007680	0.0003	0.0003	0.460423	++	-	3.32e-12
SL008113	-0.0014	0.0016	0.461509	--	NA	NA
SL010461	-0.0006	0.0007	0.464515	-+	+	0.0152242
SL014148	-0.0006	0.0006	0.465722	+-	-	0.464477
SL010529	0.0007	0.0008	0.466416	++	+	0.000284887
SL011528	0.0007	0.0007	0.467798	++	+	0.000892679
SL014896	0.0007	0.0008	0.467798	++	-	0.733912
SL014289	0.0007	0.0008	0.46785	++	+	0.86332
SL000305	0.0007	0.0008	0.474782	+-	-	0.994682
SL014071	0.0006	0.0007	0.475081	-+	-	0.367252
SL004340	0.0008	0.0009	0.48034	++	+	0.00032003
SL012740	-0.0004	0.0005	0.484318	+-	+	0.322418
SL001890	-0.0006	0.0006	0.484353	--	-	0.432961
SL008466	0.0006	0.0007	0.48629	-+	-	0.186888
SL004827	0.0006	0.0007	0.486703	-+	-	0.000862989
SL004781	-0.0015	0.0017	0.490406	--	+	0.000192777
SL018947	0.0006	0.0007	0.491826	-+	+	0.900763
SL004415	0.0006	0.0007	0.49327	++	+	0.690677
SL005437	0.0004	0.0005	0.49327	+-	+	0.293862
SL009628	-0.001	0.0012	0.495817	--	+	0.0119272
SL000409	0.001	0.0012	0.496289	++	+	2.4e-05
SL003308	0.0006	0.0007	0.496289	+-	+	0.517051
SL005730	0.0005	0.0005	0.496289	+-	-	2.2e-12
SL013969	0.0006	0.0007	0.496289	-+	-	0.287464
SL007828	0.0005	0.0005	0.49719	++	+	0.588124
SL011498	-0.0005	0.0006	0.497213	+-	NA	NA
SL004687	0.0007	0.0008	0.498988	++	+	0.600667
SL009341	0.0004	0.0004	0.502136	+-	NA	NA
SL011232	0.0007	0.0009	0.503278	++	NA	NA
SL004868	-0.0005	0.0006	0.504169	+-	NA	NA
SL000539	0.0008	0.001	0.504808	++	+	0.000180257
SL000498	0.001	0.0012	0.505834	++	+	0.1038
SL017290	-0.0004	0.0004	0.505834	+-	-	0.00928971
SL014029	0.0004	0.0005	0.509082	+-	-	0.423666
SL016550	-0.0011	0.0014	0.511081	--	+	0.415607
SL009768	0.0003	0.0004	0.511842	++	-	0.0918255
SL017528	-0.0006	0.0008	0.511842	--	-	0.238321
SL006921	-0.0007	0.0009	0.521391	--	-	0.168832
SL010505	0.0005	0.0007	0.522133	++	+	0.0536339
SL005034	-0.0015	0.0018	0.522626	-+	NA	NA
SL003197	-0.0007	0.0009	0.524477	+-	+	0.00716119
SL009792	0.0007	0.0009	0.526819	+-	NA	NA
SL010523	0.0009	0.0011	0.526936	++	NA	NA
SL000004	0.0013	0.0017	0.527176	+-	NA	NA
SL008072	-0.0009	0.0011	0.527416	--	-	0.00247214
SL005685	0.0008	0.001	0.528393	-+	+	0.954822
SL004725	0.0007	0.0009	0.530105	++	NA	NA
SL008837	0.0004	0.0005	0.53206	+-	-	8.01e-05
SL004692	-0.0004	0.0005	0.53303	--	-	0.769418
SL008008	0.0006	0.0008	0.534243	++	NA	NA
SL010492	0.0006	0.0007	0.535209	++	+	0.769968
SL019100	0.0009	0.0011	0.535562	++	NA	NA
SL000527	0.0007	0.0009	0.536769	-+	-	0.0431938
SL002075	0.0003	0.0004	0.538219	++	NA	NA
SL000137	0.0005	0.0007	0.540164	+-	NA	NA
SL000318	0.0007	0.0009	0.540164	+-	NA	NA
SL003674	0.0005	0.0007	0.540164	+-	-	0.124418
SL004148	-0.0004	0.0005	0.540164	+-	-	0.913536
SL004815	-0.0011	0.0014	0.540164	--	NA	NA
SL004901	0.0003	0.0004	0.540164	++	NA	NA
SL014468	-0.0005	0.0007	0.540164	+-	-	6.77e-14
SL008760	-0.0004	0.0006	0.547872	+-	NA	NA
SL010495	0.0004	0.0005	0.547872	+-	+	0.712397
SL006189	0.0008	0.001	0.548935	-+	+	0.784523
SL000461	-0.0019	0.0025	0.551928	+-	-	0.0309957
SL003524	-0.0006	0.0009	0.55609	+-	NA	NA
SL004350	0.0003	0.0005	0.55609	+-	NA	NA
SL011630	-0.0008	0.0011	0.5569	--	+	0.931976
SL007747	0.0006	0.0008	0.558672	++	-	0.901414
SL002078	0.0006	0.0008	0.559682	+-	+	0.791977
SL004365	0.0004	0.0006	0.559682	+-	-	0.598367
SL003331	0.0004	0.0005	0.561926	+-	+	0.528455
SL003647	0.0009	0.0013	0.568843	+-	NA	NA
SL017128	0.0003	0.0004	0.569277	-+	-	7.83e-06
SL000009	0.0004	0.0006	0.571626	++	-	0.929213
SL018887	0.0005	0.0007	0.572536	+-	+	6.1e-24
SL007774	0.0006	0.0009	0.573872	++	-	0.707034
SL010509	0.0013	0.0018	0.573872	-+	NA	NA
SL003542	-0.0006	0.0009	0.581574	+-	+	4.09e-13
SL007217	-0.0004	0.0006	0.586761	+-	-	0.734217
SL004342	-0.0004	0.0006	0.591818	+-	-	0.025912
SL004271	0.0005	0.0007	0.597104	+-	-	0.90826
SL004015	-0.0002	0.0003	0.598698	+-	NA	NA
SL000047	0.0003	0.0004	0.59922	+-	-	8.04e-19
SL004482	0.0003	0.0004	0.599385	++	-	0.00949255
SL000300	-0.0004	0.0006	0.604408	+-	+	0.697621
SL000312	0.0004	0.0006	0.605715	++	NA	NA
SL002081	0.0002	0.0004	0.605715	-+	-	2.39e-21
SL004515	-0.0007	0.0011	0.605715	+-	-	0.00824229
SL006914	-0.0006	0.0009	0.606819	+-	NA	NA
SL007361	0.0004	0.0006	0.608863	++	-	0.336562
SL006912	0.0006	0.0009	0.611847	-+	-	0.0182084
SL011549	0.0006	0.0009	0.614708	++	+	0.166117
SL003738	-0.0003	0.0005	0.615211	+-	NA	NA
SL007620	-0.0005	0.0008	0.627935	--	+	0.600351
SL004337	0.0006	0.001	0.628543	++	NA	NA
SL008190	0.0005	0.0007	0.628797	+-	-	0.580354
SL004914	0.0006	0.0009	0.635732	-+	NA	NA
SL014130	-0.0003	0.0005	0.645582	+-	+	0.48127
SL004669	-0.0003	0.0004	0.645586	+-	NA	NA
SL004349	-0.0004	0.0006	0.646526	+-	+	0.489037
SL004156	-0.0005	0.0008	0.653887	+-	-	0.826178
SL004823	-0.0005	0.0009	0.655984	--	NA	NA
SL004747	0.0003	0.0006	0.664373	++	NA	NA
SL005167	-0.0003	0.0005	0.664801	+-	-	0.5885
SL006923	0.0003	0.0005	0.664801	+-	-	0.269713
SL008916	-0.0003	0.0005	0.664801	+-	NA	NA
SL004329	0.0003	0.0006	0.668389	+-	+	0.0341308
SL012148	0.0004	0.0007	0.669765	++	+	0.828256
SL005679	0.0007	0.0013	0.678561	++	+	8.25e-07
SL000535	0.0007	0.0013	0.682099	+-	+	7.1e-06
SL003918	0.0002	0.0004	0.682099	++	NA	NA
SL007729	0.0004	0.0008	0.682187	++	-	0.0465619
SL004332	0.0003	0.0005	0.686318	++	+	0.826639
SL001795	0.0004	0.0007	0.687029	+-	+	0.228674
SL003700	-0.0007	0.0013	0.687029	--	+	0.252146
SL004335	0.0002	0.0004	0.687029	+-	NA	NA
SL003200	-0.0002	0.0003	0.690186	+-	-	3.66e-05
SL017612	-0.0006	0.0011	0.690186	--	NA	NA
SL004301	-0.0003	0.0005	0.690884	+-	NA	NA
SL006476	-0.0006	0.0011	0.690884	--	-	0.384364
SL008059	0.0004	0.0007	0.690884	+-	-	0.509404
SL005508	-0.0004	0.0008	0.69807	--	-	0.419145
SL003710	0.0004	0.0008	0.69913	+-	+	0.0279018
SL006480	-0.0002	0.0005	0.69913	+-	NA	NA
SL004182	0.0003	0.0006	0.699573	+-	+	0.553391
SL004737	-0.0003	0.0006	0.699573	+-	-	0.134592
SL006629	-0.0004	0.0008	0.699573	+-	-	0.000141518
SL000347	-0.0003	0.0006	0.700056	+-	-	0.0088049
SL010512	-0.0004	0.0007	0.700056	+-	+	0.0808839
SL004750	-0.0006	0.0012	0.700924	+-	NA	NA
SL016551	-0.0006	0.0012	0.703836	--	-	0.809586
SL011709	-0.0006	0.0012	0.704017	--	+	0.617417
SL003334	0.0002	0.0004	0.704992	+-	-	0.39005
SL009791	0.0003	0.0007	0.705398	++	NA	NA
SL014308	0.0005	0.001	0.709544	++	-	0.61117
SL006698	0.0002	0.0004	0.710625	+-	+	0.655516
SL003848	-0.0003	0.0007	0.711371	+-	NA	NA
SL005202	0.0007	0.0014	0.711371	-+	NA	NA
SL010619	-0.0002	0.0005	0.711371	+-	NA	NA
SL007324	0.0004	0.0007	0.711544	++	+	0.00715674
SL000125	0.0003	0.0007	0.712565	++	+	0.0342565
SL002702	0.0003	0.0006	0.712565	+-	-	0.297706
SL004331	-0.0002	0.0004	0.713862	--	-	0.505
SL004685	0.0003	0.0006	0.716673	+-	-	0.335933
SL004849	0.0003	0.0005	0.716673	+-	-	0.528455
SL009629	0.0004	0.0008	0.717963	++	+	0.00154286
SL007121	-0.0003	0.0007	0.718466	+-	NA	NA
SL004795	-0.0006	0.0013	0.719304	--	+	5.39e-05
SL004134	-0.0002	0.0004	0.724059	+-	NA	NA
SL003322	0.0002	0.0005	0.729142	-+	NA	NA
SL003220	0.0001	0.0003	0.734104	+-	-	0.00223009
SL003919	0.0002	0.0004	0.739839	+-	NA	NA
SL000481	-0.0002	0.0005	0.742552	+-	-	0.962347
SL004230	0.0004	0.0009	0.745372	++	NA	NA
SL004306	0.0004	0.001	0.745959	++	+	0.0226279
SL007003	0.0004	0.0009	0.750663	-+	+	0.769632
SL010494	0.0003	0.0006	0.751466	+-	-	0.624163
SL010250	-0.0005	0.0011	0.75638	--	-	0.00972037
SL000088	0.0003	0.0008	0.768611	+-	+	0.00233827
SL008504	0.0002	0.0004	0.768732	+-	+	0.000401845
SL000454	-0.0003	0.0009	0.775064	--	-	0.20216
SL010463	0.0003	0.0007	0.775064	++	NA	NA
SL006919	0.0003	0.0008	0.776285	++	NA	NA
SL007284	0.0003	0.0007	0.776731	-+	+	0.0357542
SL018625	-0.0001	0.0003	0.777729	-+	-	5.97e-10
SL000479	-0.0002	0.0006	0.778503	--	+	0.588293
SL007228	-0.0004	0.0009	0.781151	-+	-	0.687059
SL010524	-0.0003	0.0008	0.782583	-+	-	0.00287458
SL003722	-0.0004	0.0012	0.786544	--	+	0.00015237
SL010503	-0.0005	0.0014	0.795117	--	+	0.124418
SL004861	0.0002	0.0006	0.796753	+-	NA	NA
SL000633	0.0002	0.0007	0.799374	+-	-	0.891085
SL004589	0.0003	0.0007	0.803088	+-	NA	NA
SL010504	0.0003	0.0009	0.80559	-+	+	0.580354
SL004925	0.0002	0.0005	0.808306	+-	-	0.0328886
SL006993	-0.0002	0.0006	0.809159	+-	+	0.000324619
SL003648	-0.0003	0.0009	0.816678	+-	NA	NA
SL000587	0.0002	0.0005	0.821563	+-	NA	NA
SL000276	-0.0003	0.0008	0.823166	+-	NA	NA
SL003849	-0.0002	0.0005	0.824256	+-	NA	NA
SL004637	-0.0001	0.0004	0.824256	+-	-	0.474185
SL005228	-0.0002	0.0007	0.824256	+-	-	0.966126
SL007295	-0.0001	0.0003	0.824256	+-	-	1.48e-05
SL007336	-0.0001	0.0005	0.824256	+-	NA	NA
SL011100	0.0002	0.0006	0.824256	+-	+	0.0701939
SL000139	0.0002	0.0008	0.829862	+-	+	0.0809688
SL011073	0.0004	0.0012	0.831447	+-	+	1.77e-06
SL003169	0.0002	0.0006	0.837424	+-	+	0.241598
SL013928	-0.0004	0.0013	0.837424	+-	+	0.145264
SL016553	-0.0002	0.0006	0.838134	+-	-	0.781254
SL006268	0.0003	0.0011	0.838734	+-	NA	NA
SL000670	0.0003	0.001	0.839393	-+	-	0.0558192
SL007869	-0.0002	0.0006	0.839393	+-	-	0.55548
SL010530	-0.0001	0.0005	0.842204	+-	NA	NA
SL011708	-0.0003	0.0012	0.842204	+-	+	0.00153906
SL000299	-0.0001	0.0004	0.842691	+-	-	0.78722
SL000668	-0.0002	0.0007	0.844684	+-	+	6.57e-31
SL005235	0.0001	0.0005	0.844684	+-	NA	NA
SL010462	0.0002	0.0006	0.844684	+-	NA	NA
SL005187	0.0003	0.001	0.845596	-+	NA	NA
SL004253	0.0001	0.0005	0.85433	+-	-	0.00418901
SL004467	0.0002	0.0007	0.8556	+-	+	0.00175246
SL008709	-0.0001	0.0006	0.8556	+-	+	0.0309957
SL004838	-0.0002	0.0008	0.857142	-+	+	0.0479613
SL006805	-0.0001	0.0005	0.860284	+-	-	0.0013066
SL010498	0.0001	0.0006	0.86058	+-	NA	NA
SL016557	-0.0002	0.0006	0.86058	+-	-	0.359959
SL003280	-0.0001	0.0005	0.861473	+-	-	0.15375
SL017189	0.0001	0.0005	0.862897	-+	NA	NA
SL004932	0.0001	0.0006	0.864676	+-	NA	NA
SL006523	-0.0001	0.0006	0.864676	+-	-	0.000317947
SL000537	0.0003	0.0014	0.865494	+-	+	0.000738606
SL001905	-0.0002	0.0009	0.865494	+-	+	0.465316
SL006916	0.0002	0.0007	0.872317	+-	-	0.46286
SL014684	0.0002	0.0008	0.872348	+-	+	0.653866
SL000131	-0.0002	0.0007	0.873967	+-	NA	NA
SL000582	0.0001	0.0004	0.875372	+-	-	0.00390845
SL006918	0.0003	0.0013	0.877092	++	+	0.000572047
SL004334	-0.0002	0.0012	0.878703	-+	+	0.368026
SL004511	0.0002	0.001	0.87894	-+	-	0.000127826
SL005266	0.0002	0.001	0.878966	+-	+	0.0134316
SL005217	0.0001	0.0006	0.879623	+-	NA	NA
SL004475	0.0001	0.0004	0.881438	+-	-	0.943343
SL004484	-0.0002	0.0009	0.88346	-+	NA	NA
SL014048	-0.0002	0.001	0.884638	+-	NA	NA
SL004136	-0.0001	0.0004	0.884764	+-	-	0.0602446
SL000133	0.0001	0.0007	0.889716	++	-	0.827742
SL007070	-0.0001	0.0006	0.89508	+-	-	0.4176
SL004330	0.0001	0.0006	0.89593	+-	-	0.119907
SL009868	-0.0001	0.0007	0.896884	+-	-	0.0361684
SL011631	0.0002	0.0012	0.902752	+-	NA	NA
SL016567	-0.0001	0.0006	0.907983	+-	-	0.000793066
SL006542	-0.0001	0.0004	0.908194	+-	-	1.32e-15
SL004676	0.0001	0.0003	0.91143	-+	NA	NA
SL006920	-0.0002	0.001	0.913202	--	+	0.0265811
SL017614	0.0002	0.0012	0.914137	++	+	0.0910061
SL005687	0.0002	0.001	0.914759	-+	+	0.0485689
SL003726	0.0002	0.0014	0.91538	-+	NA	NA
SL000450	0.0002	0.0013	0.915788	-+	NA	NA
SL001717	0.0001	0.0006	0.915788	+-	+	0.864039
SL004101	-0.0002	0.0014	0.916821	--	+	0.00010397
SL003862	-0.0002	0.0011	0.917324	+-	+	0.150267
SL003974	0.0001	0.0006	0.917324	+-	+	1.28e-05
SL005157	0.0001	0.0006	0.917324	+-	+	1.86e-14
SL000478	-0.0001	0.001	0.917727	+-	+	0.241746
SL004348	0.0001	0.0007	0.917727	-+	-	0.920479
SL000027	-0.0001	0.0006	0.918754	--	NA	NA
SL013489	0.0001	0.0006	0.922565	++	-	0.270355
SL002542	0.0001	0.0004	0.923792	+-	NA	NA
SL003728	0.0001	0.0008	0.933774	++	+	0.433888
SL004668	-0.0001	0.0005	0.934373	+-	+	0.0482618
SL004336	0.0001	0.0005	0.940011	+-	NA	NA
SL005224	-0.0001	0.0007	0.942557	+-	+	0.0172131
SL005220	0.0001	0.0005	0.943353	+-	NA	NA
SL004305	-0.0001	0.0005	0.946583	+-	-	0.00189582
SL004872	-0.0001	0.0011	0.946583	+-	+	0.773098
SL009951	-0.0001	0.0007	0.948706	+-	+	0.913536
SL002646	0.0001	0.0009	0.948748	-+	+	0.699675
SL010499	0	0.0005	0.948748	+-	-	0.640612
SL007108	0.0001	0.0006	0.954748	-+	NA	NA
SL001718	0.0001	0.0007	0.960841	+-	-	0.832216
SL003307	0.0001	0.0012	0.961413	-+	+	0.320805
SL014208	-0.0001	0.0009	0.962189	+-	NA	NA
SL017610	0.0001	0.0012	0.963066	++	NA	NA
SL004066	0	0.0006	0.963696	+-	+	0.78722
SL013988	0	0.0007	0.963696	-+	NA	NA
SL003191	0.0001	0.0015	0.968229	+-	+	2.77e-05
SL008085	0	0.0008	0.972145	+-	NA	NA
SL004708	0.0001	0.0015	0.973975	+-	NA	NA
SL008402	0	0.0005	0.973975	+-	-	0.164409
SL000277	0	0.0002	0.984191	+-	-	0.36956
SL004636	0	0.0012	0.984191	+-	-	6.49e-05
SL005159	0	0.0006	0.984191	-+	NA	NA
SL010613	0	0.0004	0.984191	-+	-	0.0279384
SL000136	0	0.0012	0.98874	-+	+	0.617929
SL000456	0	0.0005	0.98874	+-	NA	NA
SL000480	0	0.0006	0.98874	+-	+	0.508797
SL003657	0	0.0012	0.98874	-+	NA	NA
SL003735	0	0.0006	0.98874	+-	+	0.604045
SL004299	0	0.0006	0.98874	+-	NA	NA
SL008157	0	0.0011	0.98874	-+	+	0.386317
SL010467	0	0.0003	0.98874	-+	-	4.39e-10
SL011400	0	0.0008	0.98874	+-	NA	NA
SL017611	0	0.0015	0.98874	--	NA	NA
SL005694	0	0.0013	0.990584	+-	NA	NA
SL000324	0	0.0004	0.994865	+-	-	7.96e-05
SL003041	0	0.0015	0.994865	+-	NA	NA
SL000532	0	0.0012	0.9989	+-	+	0.00450154
SL003869	0.0204	0.0005	6.56E-313	++	+	1.71e-249
