# Supplementary material for: Plasma proteomic biomarker signature of age predicts health and life span
Source: eLife. 2020 Nov 19;9:e61073. doi: 10.7554/eLife.61073 (PMC7723412; doi:10.7554/eLife.61073)
Supplement: Figure 2—source data 1. [file elife-61073-fig2-data1.xlsx]

## Sheet: Sheet1
	Sex Differences			Sex Interaction			INTERVAL*
SomaId	beta	se	B-H FDR	beta	se	B-H FDR	Coefficient.Sex	q.Sex
SL000062	-1.72181	0.0370828	5.62793e-248	-0.0118507	0.00238722	0.000105594	0.596732	5.78056805634258e-321
SL000428	1.49254	0.0458897	9.34617e-156	0.0154284	0.00295025	2.99609e-05	-0.479531	5.78056805634258e-321
SL001766	1.36435	0.0556554	1.61527e-101	0.0151407	0.00359508	0.00200019	-0.359239	3.44e-251
SL000498	1.00591	0.0417227	5.85927e-99	-0.00392411	0.00271622	0.722632	-0.382931	5.78056805634258e-321
SL000506	0.799039	0.040808	5.06919e-70	0.00235942	0.00266318	0.99756	-0.305663	2.12e-302
SL007631	-0.42933	0.0226832	4.1883e-66	-0.0094504	0.00145047	4.99552e-08	0.0880721	1.94e-78
SL001774	0.39433	0.0225455	1.21533e-57	0.00255253	0.00146969	0.507736	NA	NA
SL000045	0.277457	0.0191654	5.23442e-41	0.00394638	0.00124628	0.0449683	-0.0763405	3.84e-158
SL004258	0.304233	0.0238346	1.70279e-32	-0.00209857	0.00155483	0.773557	NA	NA
SL004438	-0.269321	0.0213593	8.38523e-32	-0.00381856	0.0013892	0.106121	NA	NA
SL004685	-0.258082	0.0217093	1.75623e-28	0.00033388	0.00141988	0.99756	0.0615032	2.04e-90
SL007471	0.197456	0.0171144	6.0145e-27	4.38717e-05	0.00111654	0.99756	-0.0517774	3.93e-32
SL003166	0.110856	0.00965313	9.54942e-27	-0.000829326	0.000629528	0.786528	-0.0392574	2.38e-90
SL000507	0.164829	0.01492	7.33901e-25	-0.00147353	0.00097093	0.66292	NA	NA
SL006777	0.174421	0.0163013	2.02245e-23	-0.000300737	0.00106727	0.99756	NA	NA
SL005196	0.124959	0.0117416	3.30094e-23	-0.00132955	0.000764788	0.507736	-0.0589455	6.65e-161
SL007179	0.130926	0.0123343	4.04847e-23	-0.000191931	0.000804601	0.99756	NA	NA
SL004594	-0.341141	0.0330551	6.28829e-22	0.00564954	0.00214882	0.135777	NA	NA
SL003672	0.147245	0.0146033	5.73969e-21	0.00196804	0.000949974	0.319534	NA	NA
SL004146	-0.247063	0.0251963	6.5113e-20	0.00659761	0.00163124	0.00319615	0.15063	4.81e-157
SL000164	-0.173894	0.0179984	2.25074e-19	0.00123745	0.00117369	0.933369	0.0944647	6.19e-151
SL000590	0.0989454	0.0105613	2.85535e-18	-0.00143132	0.00068958	0.318461	NA	NA
SL008574	0.212627	0.0227136	2.89485e-18	0.00767414	0.00145941	2.89519e-05	-0.0115396	0.0216628
SL000420	-0.486625	0.0525003	6.15528e-18	0.0238189	0.00333683	1.18742e-09	0.195291	7.27e-90
SL004855	0.111197	0.0121538	1.66342e-17	-0.000772637	0.000792532	0.975307	NA	NA
SL002528	0.24721	0.0272955	3.49594e-17	0.000453876	0.00177756	0.99756	-0.128873	1.72e-120
SL000070	0.174286	0.0193671	5.51353e-17	0.00121523	0.00126182	0.977675	-0.0283545	4.12e-11
SL000573	-0.12853	0.0143114	6.17394e-17	0.00367941	0.0009293	0.00403539	0.0639039	2.78e-104
SL007680	0.0913359	0.0106494	1.67007e-15	-4.87678e-05	0.00069722	0.99756	-0.027366	5.94e-41
SL002662	0.134327	0.0158073	3.05554e-15	0.00557236	0.00101847	1.22787e-05	NA	NA
SL000462	0.296747	0.0353608	6.85603e-15	-0.00553354	0.0023033	0.202061	-0.118839	1.65e-36
SL000254	-0.0929841	0.011147	9.93258e-15	0.00146319	0.000725384	0.355169	NA	NA
SL010288	-0.273181	0.0332552	2.60102e-14	0.00225854	0.0021653	0.936514	0.144657	3.08e-97
SL002519	0.0887613	0.0108464	3.24289e-14	0.00205983	0.00070711	0.0780708	-0.0360763	1.81e-63
SL005102	0.22254	0.0272571	3.62425e-14	-0.0144102	0.00172438	2.81412e-13	NA	NA
SL010465	0.0886873	0.0109396	5.50868e-14	-0.000236222	0.000714446	0.99756	-0.0264646	7.79e-30
SL000047	0.136433	0.0172981	2.87064e-13	0.00200054	0.00113008	0.498343	-0.0462191	1.19e-43
SL005168	0.167264	0.0213345	3.96024e-13	0.00485803	0.00138179	0.017539	-0.050508	7.99e-38
SL005172	-0.125612	0.0160563	4.3939e-13	0.000624283	0.00104741	0.99756	NA	NA
SL000052	-0.159848	0.0204517	4.53067e-13	0.000533124	0.00133556	0.99756	NA	NA
SL014070	0.119099	0.0154779	1.08653e-12	-0.00263119	0.00100581	0.135777	-0.0563602	2.91e-37
SL000382	-0.287484	0.0374135	1.1458e-12	0.00548437	0.00244088	0.258816	NA	NA
SL006544	-0.0950255	0.012427	1.47456e-12	0.00366319	0.00080502	0.000637995	0.0589868	4.34e-83
SL002823	0.101137	0.0132345	1.48717e-12	0.000865357	0.000862757	0.965367	-0.0159952	1.41e-10
SL005213	-0.119424	0.0156328	1.48717e-12	0.00245293	0.00101627	0.201771	NA	NA
SL000545	0.10043	0.0134778	5.67956e-12	0.00394842	0.00087007	0.000637995	NA	NA
SL007756	0.216944	0.029542	1.19795e-11	0.00235573	0.0019238	0.828768	NA	NA
SL008178	0.113603	0.0154945	1.27658e-11	0.00560586	0.000997376	6.43611e-06	-0.0022589	0.511785
SL008158	-0.190721	0.0265484	3.53196e-11	0.00521058	0.00172163	0.0622929	NA	NA
SL000508	0.116655	0.0163548	4.94242e-11	-5.03593e-05	0.00106946	0.99756	-0.0262928	2.96e-13
SL005574	-0.219141	0.0311613	9.66443e-11	0.00615716	0.00202454	0.0605027	NA	NA
SL004160	0.0791335	0.0112608	9.79367e-11	0.00196738	0.000734471	0.119985	-0.00592851	0.0381632
SL000383	-0.20993	0.0301131	1.40479e-10	0.00860562	0.00194568	0.00100501	NA	NA
SL000468	0.238975	0.0343959	1.61673e-10	-0.00121311	0.00224075	0.99756	NA	NA
SL014129	0.0689076	0.0100191	2.54861e-10	-0.000118212	0.000654017	0.99756	-0.0224699	2.55e-27
SL004298	0.105982	0.0156004	4.38637e-10	0.00132259	0.00101626	0.792481	-0.0167548	3.31e-06
SL000836	-0.202679	0.0298714	4.5573e-10	0.00430009	0.00193861	0.269569	NA	NA
SL010454	0.0813162	0.0120146	5.00216e-10	0.00172716	0.000782923	0.272125	-0.0147387	1.82e-10
SL004458	-0.170066	0.0252148	5.73868e-10	-0.00284244	0.00164402	0.513431	0.0968554	2.47e-92
SL000565	-0.229016	0.0340762	6.60611e-10	-0.000982253	0.00222323	0.99756	0.0744509	3.99e-45
SL003328	0.0689691	0.0102777	6.95255e-10	0.00212106	0.000669419	0.0449683	-0.00604228	0.00724005
SL005488	0.114886	0.0172005	8.4028e-10	0.00207815	0.0011214	0.458615	-0.027415	2.62e-18
SL004016	0.0767819	0.011517	8.96501e-10	0.00157289	0.000751866	0.312026	-0.0292393	2.62e-41
SL017328	-0.261379	0.0392455	9.20906e-10	0.00848806	0.00254644	0.0296909	0.150496	1.67e-70
SL004866	-0.240955	0.0363931	1.1698e-09	0.00601875	0.00236633	0.155645	0.0941786	4.18e-64
SL004588	0.128697	0.019706	2.0575e-09	0.000420441	0.00128536	0.99756	NA	NA
SL002704	0.13167	0.0201777	2.1007e-09	0.00250685	0.00131342	0.423191	-0.0420152	8.39e-51
SL004080	0.105826	0.0162449	2.22189e-09	-0.000685057	0.00106052	0.99756	NA	NA
SL000250	0.0669092	0.0102974	2.43701e-09	0.00219715	0.00066763	0.0312799	-0.0115808	7.72e-09
SL002506	0.0912066	0.0140637	2.59851e-09	-0.00232387	0.000917566	0.158815	-0.0418117	1.37e-36
SL005184	0.166973	0.0259425	3.48757e-09	0.000259205	0.00169369	0.99756	-0.0442121	1.19e-24
SL004626	0.118417	0.0185107	4.40825e-09	0.00139836	0.00120676	0.884641	-0.0132232	8.72e-06
SL006610	0.106952	0.016916	6.834e-09	0.000143578	0.00110393	0.99756	-0.0103048	0.000929278
SL005183	0.125245	0.0198102	6.834e-09	0.00118501	0.00128944	0.99756	-0.026546	1.77e-13
SL004357	-0.109304	0.017294	6.834e-09	0.00464329	0.00111893	0.00235096	0.0661616	9.05e-75
SL003785	-0.373289	0.0591087	6.95193e-09	0.00286232	0.00385105	0.99756	NA	NA
SL004466	0.0852238	0.0135505	8.06988e-09	0.000906939	0.000884183	0.953569	NA	NA
SL004875	0.101151	0.0161408	9.16558e-09	0.000130768	0.00105276	0.99756	-0.0160822	1.42e-08
SL003744	0.069035	0.0110398	9.8332e-09	1.92312e-05	0.000720783	0.999692	NA	NA
SL007502	0.0674193	0.0107953	1.01984e-08	0.00285237	0.000698872	0.00299699	0.00470836	0.0647715
SL008644	0.13878	0.0222319	1.03186e-08	0.0020308	0.00145319	0.742204	-0.034375	7.03e-08
SL003329	0.128027	0.0208174	1.78023e-08	0.000322381	0.00135907	0.99756	-0.0405207	5.07e-16
SL004153	0.10621	0.017345	2.06832e-08	0.00192706	0.00113103	0.527112	NA	NA
SL005115	0.0869524	0.0142143	2.12114e-08	0.000733543	0.000926656	0.99756	-0.00804797	0.00453098
SL003680	0.201364	0.0330514	2.43138e-08	0.000171016	0.00215396	0.99756	-0.0476904	1.92e-13
SL010455	0.0998623	0.0164586	2.79474e-08	-0.00107281	0.001074	0.96691	-0.0143048	2.37e-06
SL012783	-0.120605	0.0200513	3.79007e-08	0.0025083	0.00130871	0.420366	0.0616196	1.67e-78
SL010375	0.158348	0.0265148	4.82523e-08	-0.00251699	0.00172353	0.706782	-0.0455794	1.55e-29
SL007173	0.0715261	0.0121949	8.93202e-08	0.00104203	0.000797399	0.792481	-0.0242144	1.18e-23
SL003198	0.105822	0.0185131	2.08457e-07	-0.000761875	0.00121182	0.99756	-0.0170741	6.67e-05
SL007151	0.138532	0.0242656	2.14765e-07	0.00378401	0.00157724	0.202061	NA	NA
SL004060	0.0775252	0.0136277	2.38179e-07	0.00341079	0.00088228	0.00568211	NA	NA
SL000461	-0.513332	0.0911999	3.29636e-07	-0.00382634	0.00594227	0.99756	0.150862	2.11e-13
SL003320	0.134954	0.0239822	3.29636e-07	0.000604673	0.00156561	0.99756	-0.0303326	5.34e-15
SL016129	0.0895102	0.0160226	4.10507e-07	6.33154e-05	0.00104354	0.99756	NA	NA
SL004733	0.104275	0.0189033	5.99906e-07	-0.000700456	0.00123142	0.99756	-0.0175564	0.00786611
SL004131	0.0893537	0.0162333	6.3443e-07	0.000713997	0.001058	0.99756	-0.0111586	0.0199761
SL004867	-0.159359	0.0291229	7.48538e-07	0.00617696	0.00189063	0.0332259	0.110693	5.43e-80
SL001796	0.111612	0.0205027	8.65303e-07	0.000353334	0.00133556	0.99756	-0.0103046	0.018268
SL000003	-0.0914616	0.0168112	8.70956e-07	0.00226604	0.0010953	0.319629	NA	NA
SL000342	-0.145022	0.0268189	1.03333e-06	0.00436248	0.00174484	0.168639	0.0665505	1.57e-52
SL004804	0.0905492	0.016757	1.04507e-06	-0.00235132	0.00108738	0.286791	-0.0274462	2.93e-12
SL003060	0.0589629	0.0109188	1.0538e-06	4.13353e-05	0.00071412	0.99756	NA	NA
SL018625	0.0659161	0.0125042	2.0789e-06	0.00116565	0.000814957	0.732521	0.00258446	0.415354
SL003542	0.203383	0.0386539	2.16728e-06	0.00434126	0.00251531	0.513431	-0.0509495	6.63e-40
SL000134	0.0576549	0.0109612	2.16736e-06	0.00109165	0.000714619	0.657919	-0.0245659	1.16e-23
SL004557	-0.0614422	0.0116922	2.20498e-06	0.000673532	0.000763014	0.99756	0.03027	2.21e-34
SL009210	-0.143325	0.0273055	2.25552e-06	0.00345102	0.00177745	0.406368	0.0396743	1.36e-18
SL006029	-0.196372	0.0374382	2.2773e-06	-0.00265355	0.00243912	0.923699	-0.0253631	4.92e-05
SL008904	0.0867522	0.0166481	2.70864e-06	-0.000133798	0.00108319	0.99756	NA	NA
SL008623	0.104594	0.0204777	4.58449e-06	-0.000350041	0.00134083	0.99756	-0.0241784	2.86e-10
SL009400	0.0870193	0.01706	4.70676e-06	-3.6005e-05	0.00111339	0.998775	-0.036342	1.99e-30
SL008773	0.086032	0.0171683	7.38166e-06	-0.00170477	0.00111975	0.659316	-0.0195192	1.31e-05
SL005152	0.103597	0.0207257	7.80399e-06	0.00198292	0.00135323	0.70546	NA	NA
SL017289	-0.0807156	0.016164	7.92936e-06	0.00345194	0.00104688	0.0312799	0.0700923	1.93e-49
SL005209	0.0621446	0.0124521	7.96862e-06	7.11065e-05	0.000812857	0.99756	NA	NA
SL000320	0.110439	0.0222162	8.72281e-06	0.00319995	0.00144507	0.269569	NA	NA
SL021043	-0.081972	0.0165202	9.05523e-06	0.0030745	0.00107878	0.0866641	0.0745936	1.72e-139
SL002602	0.113486	0.02288	9.06341e-06	-0.00129056	0.00149624	0.99756	-0.0461302	6.85e-22
SL002644	0.0425485	0.00861193	9.90974e-06	0.00138223	0.000561742	0.184515	-0.00880757	1.02e-05
SL005231	0.0791128	0.0160376	1.02116e-05	-0.00175474	0.0010442	0.534991	NA	NA
SL004136	0.0746111	0.0151322	1.02552e-05	-0.0013286	0.000989114	0.775885	-0.0199553	4.77e-09
SL004482	0.0714614	0.0145155	1.05579e-05	0.000112061	0.000945107	0.99756	-0.018123	7.04e-05
SL014111	0.0823434	0.0167647	1.10675e-05	0.000243512	0.00109689	0.99756	-0.0108472	0.000371151
SL000024	-0.0838402	0.0170738	1.10675e-05	0.00162678	0.00110972	0.70546	0.033736	7.85e-14
SL000566	-0.0615456	0.012715	1.55237e-05	0.00226445	0.000825548	0.106121	NA	NA
SL003915	-0.0870061	0.0180446	1.68716e-05	-0.00165013	0.00117538	0.741173	0.0172038	5.68e-05
SL000668	0.148454	0.0311574	2.20035e-05	-0.000483221	0.00203002	0.99756	-0.0514762	1.52e-36
SL004149	0.0732645	0.0153787	2.20035e-05	0.00232173	0.00100289	0.235484	-0.00537242	0.13493
SL004805	0.0597146	0.0125435	2.22066e-05	-0.000762817	0.000818599	0.988781	-0.0210129	1.49e-08
SL003187	0.112259	0.0236126	2.27205e-05	0.000464121	0.00153603	0.99756	-0.049188	3.33e-35
SL010456	-0.130924	0.0275818	2.33653e-05	-0.000114921	0.00179756	0.99756	NA	NA
SL001996	0.0778642	0.0164205	2.37628e-05	0.000901438	0.00107593	0.99756	-0.026767	1.56e-18
SL005764	0.0960485	0.0202656	2.38402e-05	0.00361972	0.00131808	0.106121	-0.00279507	0.537359
SL000338	0.134307	0.0284644	2.61957e-05	0.00122857	0.00185615	0.99756	-0.0628582	3.33e-46
SL007674	0.0882165	0.0187051	2.62981e-05	-0.00317373	0.0012128	0.135777	-0.0622071	5.13e-17
SL012822	-0.0762822	0.0161964	2.69036e-05	-0.000985666	0.00105572	0.988781	0.0333715	1.12e-22
SL000358	0.0851507	0.0181048	2.75702e-05	0.00426803	0.00117643	0.0138015	NA	NA
SL004269	0.115993	0.0248627	3.26856e-05	-0.00218682	0.00161899	0.773557	-0.0474794	9.38e-41
SL000322	0.0656	0.0140634	3.26856e-05	0.0011719	0.000919471	0.795576	-0.0197219	1.3e-10
SL000572	0.342255	0.0734172	3.28688e-05	0.00158462	0.00478435	0.99756	NA	NA
SL008372	-0.0775112	0.0167259	3.72259e-05	-0.000454743	0.00108982	0.99756	0.0236619	7.61e-05
SL010830	-0.183256	0.0396048	3.81975e-05	0.00354052	0.0025786	0.765522	NA	NA
SL002706	0.110365	0.0238672	3.85005e-05	0.00221948	0.00155251	0.732521	0.00250831	0.644789
SL004610	0.0692755	0.0150866	4.45311e-05	-0.00179687	0.000979913	0.471178	-0.0301402	2.67e-16
SL004365	0.101026	0.0222209	5.46627e-05	-0.00141437	0.00144646	0.97325	-0.0466716	7.85e-28
SL004467	0.121862	0.0269057	5.87695e-05	0.00236899	0.00175464	0.773557	-0.0283701	3.49e-12
SL007206	0.103683	0.0229466	6.13543e-05	-0.000735788	0.00149622	0.99756	-0.00633826	0.205942
SL000522	-0.132988	0.0294416	6.13543e-05	-0.00244538	0.0019196	0.795576	0.000192944	0.974863
SL009054	0.0694217	0.015406	6.41601e-05	-0.000630702	0.00100414	0.99756	-0.0201805	1.33e-09
SL000586	0.272405	0.0607268	6.99127e-05	0.00512129	0.00395424	0.792481	NA	NA
SL008522	0.0837634	0.0187987	7.97296e-05	0.00361772	0.00122065	0.0702298	0.0138515	0.00759202
SL004327	0.0805715	0.0181705	8.73966e-05	0.000802544	0.00118493	0.99756	-0.0228634	9.68e-09
SL000252	0.0799299	0.0180578	8.944e-05	-0.00273282	0.00117574	0.231768	NA	NA
SL004359	0.0787773	0.0177976	8.944e-05	0.00161449	0.00115835	0.744656	0.00416591	0.250676
SL004644	0.0627176	0.0143334	0.000111751	0.000917806	0.000931743	0.972704	0.00203423	0.630266
SL005703	0.0277979	0.00639132	0.00012487	-7.97998e-05	0.000417167	0.99756	-0.00947082	7.65e-08
SL003738	0.0740226	0.0170434	0.000127616	-0.0011985	0.00111772	0.929714	NA	NA
SL012707	0.0682646	0.0157308	0.000128807	0.000358315	0.00102683	0.99756	NA	NA
SL002525	0.0475941	0.0110145	0.000139052	0.000924539	0.000717682	0.792481	NA	NA
SL003770	0.0890363	0.0208298	0.000169881	-0.000251642	0.00135632	0.99756	-0.0222882	4.82e-09
SL000414	0.0480535	0.011251	0.00017134	0.00116141	0.00073742	0.628228	-0.020349	4.51e-21
SL009089	0.0781134	0.0183788	0.000186606	-0.00183099	0.00119697	0.657865	-0.025145	6.07e-12
SL000057	0.0676709	0.015989	0.000200655	-0.000226036	0.00104523	0.99756	-0.00783329	0.0410449
SL000658	0.0508518	0.0120419	0.000207751	0.000649723	0.000786626	0.99756	-0.0131505	6.28e-07
SL004338	0.0694892	0.0168525	0.000317279	-0.00126954	0.00109779	0.885597	-0.0114938	0.000821326
SL007804	0.0849676	0.0206557	0.000328956	-0.00121445	0.00134327	0.99756	-0.0263822	4.66e-08
SL008591	0.162185	0.0395853	0.000349779	-0.00112743	0.00258416	0.99756	-0.0250595	0.000195898
SL003323	-0.0990775	0.0241881	0.000349779	0.00202922	0.00157785	0.793055	NA	NA
SL000478	0.167762	0.0411438	0.000376355	0.00348037	0.00267865	0.792481	-0.042327	3.34e-13
SL005190	0.070665	0.017361	0.000385614	0.00017305	0.00113386	0.99756	-0.0257965	3.21e-07
SL004297	0.102124	0.0251179	0.000391118	0.00049727	0.0016317	0.99756	-0.00513618	0.392765
SL003300	-0.0860743	0.0212268	0.000406809	0.00589509	0.00137191	0.00154756	0.047949	4.93e-29
SL014288	0.0645542	0.0159488	0.000417241	0.000360912	0.0010403	0.99756	-0.00924315	0.0132616
SL008516	-0.112978	0.0279461	0.000423325	-0.00222157	0.00182287	0.832197	NA	NA
SL004692	0.0781985	0.0193653	0.000428547	-0.00178235	0.00126467	0.741173	-0.0111186	0.00793642
SL005352	0.0848403	0.0210144	0.000428547	0.00295064	0.00136837	0.286791	0.0132851	0.00786269
SL010612	0.123446	0.0306161	0.000435069	-0.00127548	0.00199485	0.99756	-0.0398383	5.16e-13
SL002755	-0.0980148	0.0243233	0.000437152	0.00205028	0.00158334	0.792481	0.0329963	2.26e-10
SL013548	0.0613655	0.0152723	0.000456409	-0.000562913	0.000998028	0.99756	-0.0213118	6.08e-05
SL000321	0.0476569	0.0118653	0.000456709	0.00102668	0.000773649	0.783123	NA	NA
SL003440	-0.0604078	0.0151011	0.000486197	0.00273298	0.000980465	0.10064	NA	NA
SL000427	0.0820678	0.0205348	0.000490881	-0.000761533	0.00133927	0.99756	-0.0258869	4.31e-09
SL010378	0.086637	0.0217237	0.000505682	0.00409272	0.00142655	0.0841879	-0.0141827	0.000971502
SL000640	-0.0739995	0.0185644	0.000506993	0.00128485	0.00121133	0.930941	0.0208626	1.1e-10
SL005789	-0.0647029	0.0162389	0.00050777	-0.000543166	0.00106035	0.99756	0.0219201	1.79e-10
SL005508	0.116089	0.0291905	0.000521049	-6.29036e-06	0.00190342	0.999692	-0.0156859	0.000775503
SL000325	0.0566653	0.0142767	0.000535355	-0.0018533	0.000929881	0.37138	-0.032821	2.75e-14
SL008609	0.0737148	0.0185837	0.000537871	0.00105821	0.00121342	0.99756	-0.00184807	0.657659
SL014008	-0.0941558	0.0238036	0.000560105	-0.000753883	0.00155388	0.99756	0.0141537	0.00219711
SL003183	0.10748	0.027318	0.000607789	0.000963177	0.00178228	0.99756	-0.0186552	0.000168528
SL000268	0.0609545	0.0155678	0.000653568	0.00200054	0.00101292	0.382757	-0.0295213	2.09e-43
SL003340	-0.226394	0.0579996	0.000681848	-0.0048388	0.00377672	0.794943	0.0234142	0.046243
SL001737	-0.0878779	0.0225188	0.000681848	-0.00159932	0.00146958	0.923699	0.0212941	1.03e-10
SL014130	0.0807622	0.0207188	0.000690868	-0.000812642	0.00134883	0.99756	-0.00649233	0.0378782
SL008360	0.0442985	0.0114308	0.000753285	-0.000995019	0.000744598	0.777833	-0.00445874	0.187974
SL018587	0.0551826	0.0143144	0.000811991	0.00110748	0.000934136	0.855538	0.00312084	0.427108
SL000324	0.0560146	0.0145331	0.000811991	0.0011503	0.000949997	0.836201	-0.0194436	7.43e-05
SL005256	-0.136847	0.0356013	0.000842701	-0.00485249	0.00233214	0.318461	0.0337496	2.14e-07
SL004331	0.0534376	0.0139139	0.000849284	0.000152922	0.000907519	0.99756	-0.00497684	0.0486588
SL004141	0.0449165	0.011699	0.000849309	-0.000934813	0.000761961	0.828768	-0.0107777	0.000929278
SL001728	0.0723641	0.0189227	0.000898129	-0.000182971	0.00123424	0.99756	-0.0150118	0.00625478
SL006119	0.0808677	0.0212357	0.000952952	-0.00435886	0.0013929	0.0475002	-0.109562	3.28e-55
SL008382	-0.117616	0.0309004	0.000953316	-0.00271765	0.0020137	0.773557	NA	NA
SL003192	0.0295247	0.00775838	0.000953316	0.000577386	0.0005058	0.9013	0.0166616	7.23e-12
SL010468	-0.0445205	0.0117539	0.00101802	0.000779988	0.000766777	0.953569	0.0168894	3.64e-15
SL004516	-0.123018	0.0325184	0.00103215	-0.00219698	0.00212171	0.942676	0.0331079	0.000406926
SL000528	-0.112746	0.0298335	0.00104295	0.00150918	0.00194514	0.99756	0.0537945	7.32e-25
SL002542	0.0559014	0.0148363	0.00108231	-0.00047039	0.000966949	0.99756	NA	NA
SL000271	0.0582089	0.0154504	0.00108231	-0.00111456	0.00101444	0.922119	NA	NA
SL004492	0.0611981	0.0163677	0.00119951	0.00113403	0.0010633	0.930941	-0.00799342	0.0472116
SL003970	0.0892928	0.0238823	0.00119951	0.00377361	0.00155358	0.195393	0.0280972	1.26e-06
SL003869	-0.0800778	0.0215586	0.00131264	-0.00237779	0.00140533	0.533091	0.0104735	0.0114984
SL005220	0.0664935	0.017906	0.00131264	0.000218823	0.00116887	0.99756	NA	NA
SL010449	0.0511848	0.0137919	0.00131815	0.00141124	0.000899934	0.628228	NA	NA
SL005699	0.0710889	0.0191621	0.00131858	0.00165083	0.00125189	0.786528	-0.0276007	1.08e-14
SL008945	-0.258736	0.0700219	0.00138993	-0.00795997	0.00455633	0.503566	NA	NA
SL007207	0.0610353	0.0165345	0.00140399	0.000803292	0.00107877	0.99756	NA	NA
SL008381	-0.0565912	0.0153445	0.00141583	0.000727772	0.000998747	0.99756	-0.0221008	3.24e-11
SL000272	0.0312813	0.0085077	0.0014718	0.00141832	0.000554661	0.152462	-0.00123131	0.522953
SL000319	0.040498	0.0110289	0.00148788	0.000807917	0.000718289	0.910459	NA	NA
SL004209	-0.0836132	0.0227727	0.00148788	0.00124803	0.00148516	0.99756	0.0232615	0.000829739
SL004683	0.0949438	0.0258696	0.00149019	-0.00126521	0.00168758	0.99756	NA	NA
SL005236	0.0745828	0.0204815	0.00165622	-0.000838387	0.00134088	0.99756	-0.0187484	2.45e-09
SL007056	0.0660428	0.0181951	0.00171829	0.000346772	0.00118504	0.99756	-0.0102899	0.00924079
SL001753	0.0805833	0.0222015	0.00171829	0.00225082	0.00144357	0.63578	NA	NA
SL000613	0.0568887	0.0156984	0.00174813	0.000351977	0.00102355	0.99756	-0.00310034	0.426407
SL000458	0.0546183	0.0150898	0.00176743	0.000665972	0.000982925	0.99756	-0.00401291	0.405332
SL009324	0.0492851	0.0136197	0.00176743	0.000316137	0.000888828	0.99756	-0.0148249	6.88e-08
SL003066	-0.0391492	0.0108423	0.00181355	0.00302874	0.000702853	0.00154756	0.0361066	1.91e-67
SL012248	0.0884858	0.0245514	0.00185245	-7.06542e-05	0.00160022	0.99756	NA	NA
SL009792	-0.128061	0.0355864	0.00188296	0.00342617	0.00231426	0.698564	NA	NA
SL001888	-0.0441747	0.0123048	0.00193666	-0.000205663	0.000802835	0.99756	NA	NA
SL000558	0.0414605	0.0116029	0.0020542	0.00112531	0.00075532	0.688729	-0.00961987	3.77e-06
SL005174	-0.0884415	0.0247652	0.00206222	0.00205036	0.00161328	0.795576	NA	NA
SL004475	0.0565607	0.0158489	0.0020718	-0.00174794	0.00102932	0.531024	-0.0129592	0.0129023
SL004844	0.0649517	0.0182052	0.0020718	-0.00161181	0.00118449	0.773557	-0.0103593	0.00601339
SL005210	0.0590892	0.0165712	0.00207824	-0.00236737	0.00108432	0.278933	-0.020691	1.2e-05
SL014983	-0.0917501	0.0257497	0.00208969	0.00212885	0.0016806	0.798148	NA	NA
SL003189	0.100722	0.028311	0.00212451	0.000994519	0.00184174	0.99756	-0.0235318	4.09e-06
SL004125	0.0562016	0.0158264	0.00216813	0.000298026	0.00103361	0.99756	0.0115064	0.00479873
SL004635	0.0568421	0.0160279	0.00219761	-0.00152919	0.00104566	0.706687	-0.0170094	8.16e-10
SL010369	0.0533935	0.0150671	0.0022115	0.00035151	0.000981215	0.99756	NA	NA
SL010495	0.0615711	0.0175695	0.00254998	-0.000380777	0.00114691	0.99756	-0.00370105	0.310556
SL006522	0.0794702	0.0227581	0.00265863	-0.000849008	0.00148513	0.99756	NA	NA
SL004366	0.109976	0.0315099	0.00266601	-0.000818355	0.00206494	0.99756	-0.00640128	0.235321
SL019096	0.062672	0.0180151	0.00276839	0.00106235	0.00117243	0.99756	NA	NA
SL001717	0.0701311	0.0202587	0.0029361	0.000472947	0.00131924	0.99756	0.00017148	0.974501
SL004180	0.0581303	0.016821	0.00298866	-0.00142544	0.00109865	0.792481	-0.0144618	1.82e-05
SL004457	0.136008	0.0394353	0.00305034	0.000787051	0.0025701	0.99756	NA	NA
SL004118	-0.0530993	0.0153999	0.00305034	0.00360092	0.00100144	0.0138015	0.0276636	3.5e-21
SL004484	-0.131607	0.0382364	0.00310641	-0.000515599	0.00249082	0.99756	NA	NA
SL013490	0.0504564	0.0146692	0.0031211	-0.0032593	0.000952665	0.0228191	-0.0177452	0.000890533
SL010496	0.052511	0.0152722	0.00312305	-9.5734e-05	0.0009986	0.99756	-0.021221	6.77e-05
SL006406	0.044386	0.012935	0.00318928	-0.0014867	0.000846157	0.500615	-0.0040952	0.145303
SL008933	0.0921662	0.0270478	0.00346464	0.00066143	0.00176497	0.99756	NA	NA
SL004064	0.0755506	0.0221777	0.00346464	-3.57921e-05	0.00144572	0.999692	NA	NA
SL003916	0.0754876	0.022279	0.00368647	-0.000585542	0.00145288	0.99756	-0.0276443	1.8e-05
SL003326	0.13183	0.039092	0.00388898	-0.00154207	0.00254609	0.99756	-0.0582361	1.26e-17
SL004155	0.108314	0.0322468	0.00406445	0.0022556	0.00209878	0.929714	-0.022717	0.000236587
SL004352	0.0614944	0.0183306	0.00411058	0.000358247	0.00120051	0.99756	NA	NA
SL010462	0.0698517	0.0208786	0.00423051	0.0011945	0.00135934	0.99756	NA	NA
SL004142	0.0833333	0.0249318	0.00426169	-0.000106971	0.00162248	0.99756	-0.00952441	0.00284935
SL004296	-0.148095	0.0443436	0.00428655	0.00193264	0.00288923	0.99756	0.0896362	5.82e-62
SL004350	0.0546685	0.0163882	0.00433088	-0.000237319	0.00107273	0.99756	NA	NA
SL005173	0.0365161	0.0109604	0.00437882	0.00125764	0.000716569	0.500615	NA	NA
SL000021	0.0810497	0.0243477	0.00440664	0.000478972	0.00158048	0.99756	0.00639921	0.251458
SL010520	0.0507305	0.0152744	0.0045099	-1.34134e-06	0.000993786	0.999692	-0.0147024	2.17e-05
SL010467	-0.035812	0.0108274	0.00471591	-2.52958e-05	0.000708708	0.998775	0.0110727	1.81e-06
SL000089	0.0566828	0.0171783	0.00483114	-0.000147528	0.00111914	0.99756	-0.00385673	0.112078
SL006527	0.0482713	0.0146407	0.00485705	-0.000373725	0.000955735	0.99756	NA	NA
SL000055	0.0402222	0.012238	0.00501998	0.0017453	0.000798631	0.278933	NA	NA
SL007774	0.106578	0.0324496	0.00504143	-0.00133434	0.00210676	0.99756	-0.0148964	0.000525665
SL004861	0.0722035	0.0219912	0.00504293	-0.000506924	0.00143824	0.99756	NA	NA
SL007328	0.036358	0.0110882	0.00510045	4.11886e-05	0.000725616	0.99756	-0.00511722	0.0486588
SL001990	0.0687521	0.0211743	0.0056835	-0.000450393	0.00138066	0.99756	-0.0186468	1.33e-05
SL000541	0.0625558	0.019301	0.00577973	0.00169398	0.00125784	0.773557	NA	NA
SL018509	0.052648	0.0162889	0.00594018	-0.00138744	0.00106207	0.792481	-0.0167014	1.66e-07
SL006230	0.0393236	0.0121819	0.00600311	0.00279443	0.000790433	0.0167998	NA	NA
SL010499	0.0583753	0.0181611	0.00627414	0.00104271	0.00118153	0.99756	-0.0012376	0.783526
SL001998	-0.0505023	0.015765	0.00648833	0.00592714	0.00101702	2.46964e-06	0.044332	3.97e-55
SL007049	0.123593	0.0386211	0.00654057	0.000299901	0.00251395	0.99756	-0.0485214	2.31e-07
SL004646	0.0452684	0.0141857	0.00672111	-0.000224101	0.000926321	0.99756	-0.0205982	5.17e-07
SL004147	0.0516633	0.0162464	0.00695596	0.000178554	0.00105859	0.99756	-0.0158198	8.7e-09
SL000053	-0.100222	0.0315262	0.00695596	0.00643518	0.0020381	0.0453963	NA	NA
SL000251	0.0317933	0.0100117	0.00701219	-5.41407e-05	0.000652645	0.99756	-0.00140653	0.5747
SL014294	0.073508	0.0231653	0.0070466	0.000966662	0.00151036	0.99756	NA	NA
SL006698	0.0504104	0.0159201	0.0071845	0.000881976	0.00103771	0.99756	-0.00769043	0.0313343
SL014268	0.0402278	0.0127257	0.00728984	-0.00194437	0.000827511	0.222539	-0.0183195	3.25e-08
SL000617	-0.0674957	0.0213827	0.00737807	0.00292658	0.00139211	0.311537	NA	NA
SL004326	0.0423599	0.0134336	0.00743569	-0.00147435	0.000874471	0.53471	-0.0140241	1.58e-07
SL000483	0.0699882	0.0222145	0.00747867	-0.000394716	0.00144604	0.99756	NA	NA
SL000695	-0.0426171	0.013551	0.0075957	-0.000614416	0.000884182	0.99756	0.0133676	0.00226171
SL005157	0.06849	0.0220512	0.00863201	0.00444366	0.00143221	0.0503137	-0.0274208	3.57e-11
SL006922	0.0445311	0.0143501	0.00868404	0.000727154	0.000942738	0.99756	-0.0184892	0.00291161
SL004078	0.118409	0.0381763	0.00869838	0.0040596	0.00248504	0.580682	0.00178135	0.686371
SL010498	0.067496	0.0217721	0.00871572	-0.000969978	0.00142072	0.99756	NA	NA
SL005179	0.0765133	0.0246893	0.0087173	-0.00176116	0.00161238	0.923699	-0.00741757	0.0549487
SL004351	0.0617415	0.0199913	0.00899963	-0.00137581	0.00130119	0.933369	-0.017762	1.35e-05
SL006911	0.0447344	0.014494	0.00903191	0.000209284	0.000948283	0.99756	-0.00360985	0.286038
SL014113	0.0576073	0.0187077	0.00921456	-0.00234934	0.00121928	0.413037	-0.00918303	0.048218
SL006992	0.0543311	0.0176807	0.00938258	0.000901187	0.00115164	0.99756	NA	NA
SL004304	0.0572711	0.0186709	0.00952401	-0.00110567	0.00122036	0.99756	NA	NA
SL004128	0.0695661	0.0227643	0.00985355	-0.000722801	0.00148459	0.99756	-0.000459114	0.91154
SL019019	0.0523655	0.0171401	0.00985355	-0.000409962	0.0011166	0.99756	-0.0204513	1.54e-06
SL000415	0.0305896	0.0100205	0.00989953	0.00194618	0.000651282	0.0680096	0.00527258	0.00205871
SL004712	0.0520387	0.0170813	0.0100705	-0.000823554	0.00111388	0.99756	-0.0267694	1.15e-19
SL004673	0.0426059	0.0139953	0.0101123	0.000367229	0.000916063	0.99756	-0.00315389	0.307923
SL003334	-0.0448211	0.0147773	0.0104573	0.00147994	0.000967135	0.657865	0.0124909	2.95e-08
SL000280	0.0672983	0.0222555	0.0107427	0.00178506	0.00144709	0.828768	-0.0102121	0.00195508
SL000249	0.0630957	0.0209598	0.011196	-0.00213844	0.00136429	0.628228	NA	NA
SL000299	0.0475295	0.0158382	0.0115067	-0.000570477	0.00103481	0.99756	-0.00189076	0.55518
SL011498	0.063689	0.0212592	0.0116509	-0.000191569	0.00138391	0.99756	NA	NA
SL004337	-0.10924	0.0364818	0.0116509	0.00183788	0.00238107	0.99756	NA	NA
SL004724	0.0519015	0.0173345	0.0116509	0.00107783	0.00112915	0.980919	NA	NA
SL004134	0.0405833	0.0136093	0.0120786	0.00188441	0.000884948	0.299031	NA	NA
SL000542	-0.134223	0.04513	0.0123499	0.00427458	0.00293794	0.711397	NA	NA
SL005725	0.0626668	0.0210815	0.0123755	-0.00011179	0.00137284	0.99756	-0.00616559	0.16149
SL004137	-0.0575817	0.0193793	0.0123871	-0.00150271	0.00126207	0.85301	0.0119274	0.0730675
SL018891	0.0564334	0.019053	0.0127285	0.000894356	0.00124161	0.99756	-0.00990845	0.0101957
SL004868	0.0605359	0.0205138	0.0131428	-0.000341893	0.00133464	0.99756	NA	NA
SL004637	0.0485677	0.0164906	0.0133077	-0.00037042	0.00107582	0.99756	-0.014895	3.47e-05
SL010617	-0.110107	0.0373865	0.0133077	-0.00458641	0.0024365	0.440602	0.0110637	0.0380502
SL010450	0.0413958	0.0140727	0.0134181	-4.00791e-05	0.000921905	0.99756	-0.0160862	2.85e-10
SL004336	0.0548347	0.018708	0.013835	-0.000700617	0.00121798	0.99756	NA	NA
SL001938	0.0500937	0.0171075	0.0139193	0.00284013	0.00111179	0.152462	NA	NA
SL004625	0.0506333	0.0173287	0.0141184	0.000697498	0.00112887	0.99756	-0.00173671	0.570082
SL010328	-0.033034	0.0113061	0.0141184	0.00134904	0.000738798	0.473387	NA	NA
SL001761	0.0541042	0.0185313	0.0141759	-0.000818532	0.0012076	0.99756	0.00159881	0.745458
SL004347	-0.0845364	0.0290002	0.0143379	-0.00239888	0.00189619	0.798148	0.028612	3.41e-09
SL004718	0.0509657	0.0175509	0.0148102	-0.00183926	0.00114155	0.603567	-0.0158655	6.08e-05
SL005167	0.0564635	0.0194628	0.0148963	0.00132664	0.00126465	0.934646	-0.00673447	0.0739197
SL004843	0.0336822	0.0116276	0.015056	0.000966411	0.000759714	0.795576	-0.00584943	0.0340325
SL011768	0.0815325	0.028255	0.0155485	7.74892e-05	0.00184929	0.99756	NA	NA
SL003362	0.0409424	0.0142848	0.016478	0.00100795	0.000931373	0.927251	NA	NA
SL003994	-0.0571529	0.0199605	0.0165765	0.00466456	0.00129275	0.0138015	NA	NA
SL001815	0.0332737	0.0116822	0.0173229	0.000135225	0.000764782	0.99756	-0.038239	3.75e-34
SL000124	0.035788	0.0125752	0.017396	7.29549e-05	0.000820993	0.99756	0.0020006	0.479187
SL002075	0.039424	0.0138885	0.0177467	-0.000446438	0.000906325	0.99756	NA	NA
SL011888	-0.0390473	0.0137621	0.0177649	0.00110045	0.000895833	0.828768	0.0324392	3.05e-37
SL007025	-0.129519	0.0458229	0.0183144	-0.00204103	0.00298558	0.99756	NA	NA
SL001713	0.0753459	0.0267597	0.0188878	-0.000608195	0.00174165	0.99756	-0.013574	0.000283379
SL003728	0.081517	0.0289694	0.0188888	-2.37513e-05	0.00188464	0.999692	-0.00637148	0.187378
SL005223	0.0465013	0.0165266	0.0188888	-0.000186774	0.00108537	0.99756	-0.0134252	0.000313127
SL000343	-0.0478407	0.0171476	0.02024	0.00109978	0.00111828	0.972704	NA	NA
SL010391	0.0441896	0.0158469	0.02024	-0.000163315	0.00103399	0.99756	-0.0146522	1.94e-08
SL003974	0.0683562	0.0245143	0.02024	-0.000345522	0.00159907	0.99756	-0.00828446	0.0763463
SL002517	0.048799	0.0175939	0.0211152	0.00112673	0.00114542	0.972704	-0.00546512	0.104714
SL011499	-0.0892496	0.0322328	0.0213233	0.000604422	0.00209965	0.99756	0.0217165	0.0036401
SL010457	0.0524746	0.0189586	0.0213233	-0.00111412	0.00123304	0.99756	-0.00886406	0.0110614
SL000314	0.0603392	0.0218022	0.0213233	0.0019006	0.00142083	0.777833	NA	NA
SL010458	0.0489644	0.0177326	0.0216753	0.000488491	0.00116014	0.99756	-0.00328337	0.279673
SL000323	0.0420889	0.0152978	0.022277	-0.00160177	0.000997917	0.607447	NA	NA
SL000481	0.0512174	0.0186358	0.0224176	0.000754846	0.00121093	0.99756	-0.00129042	0.801724
SL008416	0.0370756	0.0135213	0.0227067	0.00131328	0.000881325	0.688729	0.0107887	7.67e-05
SL010613	0.0413634	0.0150849	0.0227067	0.000447821	0.000984184	0.99756	-0.00591703	0.0537179
SL005261	0.0489954	0.017873	0.0227067	-0.00108405	0.00116195	0.988781	-0.0065798	0.0475519
SL006910	-0.0541843	0.0197752	0.0227292	-0.00601775	0.00127538	0.000321726	-0.0171804	7.64e-05
SL004066	0.0677334	0.0247609	0.0229773	-0.00284777	0.00161565	0.499202	-0.00906826	0.00691887
SL009349	0.0255175	0.00933553	0.0230598	-8.23647e-05	0.000611191	0.99756	-0.00270373	0.193513
SL000516	0.0722901	0.0264722	0.0231756	0.00114165	0.00172158	0.99756	-0.0184218	9.72e-06
SL005164	0.0637241	0.0234222	0.0238285	-0.00044219	0.00152737	0.99756	-0.0152016	0.000156632
SL004157	0.0738576	0.0272738	0.0246788	0.00151737	0.00177315	0.99756	NA	NA
SL019978	0.0698227	0.0259697	0.0260774	0.000808954	0.00168818	0.99756	-0.00598049	0.31178
SL006892	0.0589171	0.0219602	0.0264527	0.000523957	0.00142587	0.99756	-0.0138057	4.42e-05
SL004248	0.0606699	0.0226688	0.0267797	-0.000886422	0.00147509	0.99756	-0.00727216	0.0492155
SL002762	-0.226929	0.0847936	0.0267797	-0.00179975	0.00552572	0.99756	0.0130434	0.102217
SL000048	0.0361588	0.0135125	0.0267797	0.0019383	0.00088022	0.272827	NA	NA
SL000530	0.0441415	0.0165031	0.026804	-0.000745756	0.00107544	0.99756	-0.0204169	0.000283897
SL005161	0.0496235	0.0185695	0.0268648	-0.00134489	0.00120645	0.910459	NA	NA
SL005361	0.0460722	0.0172416	0.0268648	0.000353334	0.00112327	0.99756	NA	NA
SL003308	0.0658952	0.0247331	0.0274262	0.000439947	0.00161932	0.99756	-0.00677645	0.187156
SL008639	0.0412326	0.0155024	0.0277166	-0.00113365	0.00100894	0.910459	NA	NA
SL000131	0.0722606	0.0271822	0.0277558	-0.00120363	0.00176957	0.99756	NA	NA
SL014108	0.0544638	0.020501	0.0278264	0.00114272	0.00133327	0.99756	NA	NA
SL006397	-0.0351005	0.0132397	0.0281863	0.000535091	0.000863597	0.99756	NA	NA
SL004579	0.0374663	0.0141403	0.0281863	-7.84355e-05	0.000923174	0.99756	-0.0185097	4.93e-10
SL003043	0.14101	0.0532315	0.0281863	0.00184773	0.00346861	0.99756	NA	NA
SL000515	0.0518373	0.0195713	0.0281863	-0.000746759	0.00127979	0.99756	NA	NA
SL014028	0.0396761	0.0150121	0.0285722	0.00172539	0.00097746	0.498885	-0.0175379	2.41e-10
SL003191	0.151414	0.057307	0.0285722	-0.00143549	0.00373443	0.99756	-0.0546465	2.59e-09
SL004891	-0.0735268	0.0278666	0.0287597	0.0011699	0.00181822	0.99756	0.0487962	1.23e-05
SL000550	-0.413005	0.156551	0.0287597	-0.0016246	0.0102023	0.99756	NA	NA
SL004335	0.0410225	0.0155686	0.0289584	0.000264429	0.00101697	0.99756	NA	NA
SL000633	0.0647239	0.0246494	0.029668	7.42359e-05	0.00160653	0.99756	-0.0137894	0.0147826
SL006108	0.0731225	0.0278849	0.0298885	-0.00267433	0.00181783	0.704564	NA	NA
SL004670	0.0593843	0.0226723	0.030081	-0.00287702	0.00147675	0.402562	-0.0167269	0.000183439
SL004367	0.109171	0.0417165	0.030198	-0.0010183	0.00271848	0.99756	-0.0270183	4.49e-06
SL004708	0.144872	0.0554169	0.0303626	-0.000925505	0.00361141	0.99756	NA	NA
SL004332	0.0494375	0.0189178	0.0303711	-0.00028404	0.00123255	0.99756	0.00169027	0.611595
SL004652	0.0350592	0.0134261	0.0304693	0.000568273	0.000878559	0.99756	NA	NA
SL007953	0.0696503	0.0267182	0.030783	-0.000874153	0.00173898	0.99756	0.00407055	0.599836
SL000133	0.0702402	0.0269964	0.0311567	0.000718573	0.00175718	0.99756	-0.00436599	0.295668
SL002508	-0.0395407	0.0152052	0.0311992	0.00069177	0.000991704	0.99756	0.0260855	4.21e-13
SL000076	-0.087541	0.0337694	0.0318639	-0.0014474	0.00221072	0.99756	0.0227545	0.00563598
SL000308	0.0407043	0.0157172	0.0320137	0.0042985	0.00101717	0.00198918	-0.0157209	0.000744557
SL006713	-0.0599509	0.0232122	0.0325893	-0.000466725	0.00151595	0.99756	0.0277591	3.09e-08
SL004469	0.11403	0.044191	0.0327266	-0.00127186	0.00287965	0.99756	-0.0393603	5.98e-10
SL004859	0.061138	0.0237687	0.0334277	0.000760899	0.00155898	0.99756	-0.00487075	0.53414
SL003349	0.0650197	0.0252967	0.0335249	0.00165965	0.00164739	0.962389	-0.0091846	0.042239
SL004556	-0.0298683	0.0116292	0.0336219	0.000852003	0.000758103	0.910459	0.0130096	4.58e-08
SL003186	0.0627537	0.0244494	0.0337034	-0.000599649	0.00159335	0.99756	-0.00654664	0.0358968
SL011406	0.0638492	0.0250072	0.0349359	-0.000445315	0.00163078	0.99756	-0.00789866	0.0358968
SL001721	0.0461625	0.0180976	0.0350977	2.04609e-05	0.00118016	0.999692	-0.0108245	0.000316925
SL005191	0.0364456	0.0143933	0.0369142	0.000746544	0.00093991	0.99756	-0.00905455	0.00392283
SL002071	0.0693782	0.0274699	0.0375108	-0.000728443	0.00178423	0.99756	-0.0146835	0.000984169
SL004716	0.048014	0.0190314	0.0377084	0.000423906	0.00123842	0.99756	NA	NA
SL002702	0.0525913	0.020883	0.0380962	-0.000397346	0.00135977	0.99756	-0.0173158	1.32e-07
SL000582	0.0370206	0.0147092	0.0381687	-0.000325929	0.000959386	0.99756	-0.0130879	3.71e-05
SL004152	0.0413438	0.0165153	0.039541	0.00247041	0.00107841	0.238534	NA	NA
SL001797	0.0318905	0.0127505	0.039541	0.000821974	0.000833874	0.972704	-0.0144358	0.00454296
SL003041	0.143566	0.057406	0.039541	-0.00387383	0.00373777	0.942676	NA	NA
SL005201	0.0200567	0.00802009	0.039541	-0.000974702	0.000523756	0.455664	-0.0262624	4.19e-40
SL002565	0.0774625	0.031036	0.0399945	-0.00147119	0.00201424	0.99756	-0.0123907	0.0254378
SL007729	-0.0757264	0.0303532	0.0400132	-0.000911739	0.00198455	0.99756	0.01768	0.044557
SL009768	0.0387581	0.0155662	0.0404026	-0.000762124	0.00101353	0.99756	-0.0119366	0.00204823
SL004686	0.0480569	0.0193026	0.0404026	-0.00104241	0.00126117	0.99756	-0.0174267	2.85e-08
SL000589	0.0869416	0.0353875	0.0441582	0.00297154	0.0023032	0.792481	-0.00201185	0.717113
SL014069	0.0454119	0.0185203	0.0446436	-0.00191128	0.00120742	0.624789	-0.0155336	1.16e-06
SL004360	0.0485166	0.0198209	0.0450696	-0.00147482	0.00129284	0.9013	-0.00230602	0.504731
SL000587	0.0513263	0.0209879	0.0452363	0.000285159	0.00137091	0.99756	NA	NA
SL000248	0.0194529	0.00795866	0.0452857	0.000727977	0.00051946	0.741173	NA	NA
SL004661	0.0439927	0.0180563	0.046164	0.000131122	0.00117718	0.99756	-0.00182124	0.576539
SL000300	0.0518526	0.0213465	0.0469912	6.02626e-05	0.00139394	0.99756	-0.012191	0.000329123
SL004126	0.0428721	0.0177207	0.0481513	0.00023113	0.00115557	0.99756	NA	NA
SL004829	-0.0868106	0.0359456	0.0486003	0.00082549	0.00234167	0.99756	NA	NA
SL005217	0.0519682	0.0216079	0.0498277	-0.000729132	0.00140712	0.99756	NA	NA
SL004726	0.0318163	0.0132746	0.0508384	0.000773896	0.000868422	0.99756	NA	NA
SL014228	0.0425044	0.0177867	0.0517072	-0.00101159	0.0011611	0.99756	-0.0112215	0.00548732
SL003993	-0.0327783	0.0137405	0.0521679	0.00084916	0.000895687	0.98441	0.0430239	3.01e-23
SL004015	0.0260005	0.010905	0.0522234	0.00170444	0.000709435	0.202061	NA	NA
SL018548	0.0363448	0.0152709	0.052709	0.00198658	0.000993445	0.367884	NA	NA
SL006114	0.0321654	0.0135235	0.0527998	0.00133338	0.00088172	0.664685	NA	NA
SL005493	0.060429	0.0254242	0.0529153	0.00106376	0.00165451	0.99756	NA	NA
SL003193	-0.0412051	0.0173428	0.0529228	0.00204583	0.00112964	0.473387	0.0277398	1.2e-14
SL000622	-0.0512099	0.0215882	0.0533432	-0.000250568	0.0014128	0.99756	NA	NA
SL002081	0.0293606	0.0123938	0.0536729	0.000138101	0.000812328	0.99756	0.00895263	0.00135845
SL000360	0.0303229	0.0128195	0.0540737	0.00225063	0.000833951	0.116577	-0.00983083	0.000224839
SL004849	0.0526094	0.0222512	0.0541016	0.000782959	0.00145089	0.99756	-0.00468435	0.307923
SL004827	-0.0607331	0.0258934	0.0567664	0.00049506	0.0016886	0.99756	0.0233531	5.25e-06
SL017106	0.0527807	0.0225199	0.0569124	0.000848677	0.00147458	0.99756	0.00748385	0.185468
SL008810	0.0277742	0.0118665	0.057257	0.000592593	0.000774499	0.99756	-0.0129106	1.14e-07
SL007070	0.0490889	0.0210489	0.058427	0.000455544	0.00137157	0.99756	-0.0136744	0.000502171
SL010519	0.0422278	0.0181572	0.0593026	0.00086192	0.00118542	0.99756	-0.0251305	0.00290421
SL000597	0.0516249	0.0222115	0.0593937	0.00107808	0.00144575	0.99756	-0.00718882	0.0193421
SL000424	0.0280208	0.0120627	0.0594651	0.00140591	0.000788334	0.489447	NA	NA
SL005208	-0.0385535	0.016608	0.0594872	-0.000844906	0.00108359	0.99756	0.027008	1.17e-14
SL020172	0.055874	0.024072	0.0594872	-0.000410739	0.00156661	0.99756	-0.00634111	0.0718712
SL006448	0.038987	0.0168108	0.0595614	0.00141521	0.00109736	0.792481	NA	NA
SL003951	0.0859422	0.0370613	0.0595614	-0.000528774	0.00241523	0.99756	-0.0368385	2.35e-08
SL010388	-0.0677206	0.0292637	0.0601857	0.00252614	0.00190985	0.786528	-0.000537628	0.942023
SL004645	-0.0399974	0.0173128	0.0606724	-0.00146376	0.00112567	0.792481	0.013914	0.00693241
SL005087	-0.027335	0.0118428	0.0608733	0.00221819	0.000769959	0.0836534	0.027743	4.04e-34
SL004919	-0.0923815	0.0402369	0.0627199	0.00197828	0.00262149	0.99756	0.0554766	1.66e-34
SL003080	-0.0617868	0.0269602	0.0632699	0.000551439	0.00175612	0.99756	NA	NA
SL001716	0.0675959	0.0295798	0.0642313	0.00113668	0.00192349	0.99756	-0.00607445	0.244201
SL010610	0.039962	0.0175468	0.065069	0.000800884	0.00114135	0.99756	-0.00410839	0.131523
SL008190	0.0601915	0.0264323	0.065069	0.000419745	0.00172012	0.99756	-0.00358224	0.38521
SL006550	0.029438	0.0129286	0.065069	0.00225644	0.000843053	0.119985	NA	NA
SL008177	0.0260362	0.0114351	0.065069	0.00015033	0.000745569	0.99756	-0.00532942	0.0152173
SL000130	0.0561211	0.0246818	0.0654544	0.00090574	0.00160688	0.99756	-0.0108319	0.00357741
SL016128	0.0396955	0.017491	0.0660442	0.00106433	0.00114275	0.988781	NA	NA
SL007453	0.0485705	0.0214299	0.0664245	-0.000691596	0.00139194	0.99756	NA	NA
SL003341	0.0534995	0.023663	0.0671949	0.00284204	0.00153917	0.462559	NA	NA
SL000433	-0.0959144	0.0424337	0.0671949	0.00093545	0.00276409	0.99756	0.00510069	0.53414
SL004299	0.0495113	0.022017	0.0690915	-0.00276842	0.00143066	0.407668	NA	NA
SL000563	0.116255	0.0517542	0.0693805	0.00143141	0.00337253	0.99756	-0.0842838	1.03e-27
SL008936	0.0269182	0.0120451	0.0713141	0.000365127	0.000786302	0.99756	NA	NA
SL012168	0.046214	0.0206922	0.0714193	-7.97247e-05	0.00135402	0.99756	NA	NA
SL004067	0.0451995	0.0203478	0.0735032	-0.00019007	0.00132988	0.99756	-0.0122173	0.00032626
SL007272	-0.0503367	0.0226757	0.0735215	0.00138915	0.00148687	0.988781	0.0448667	0.000282512
SL003327	0.0338007	0.0152284	0.0735215	0.00130892	0.000992238	0.786528	NA	NA
SL003800	0.052379	0.0236285	0.073897	0.000503077	0.00154192	0.99756	-0.00653594	0.0420834
SL009045	-0.0865376	0.0391916	0.0753917	0.000863237	0.00255856	0.99756	-0.0199495	0.0155325
SL004908	0.0369017	0.0167347	0.0758092	6.41839e-05	0.00109479	0.99756	-0.027604	5.34e-05
SL008402	0.0414127	0.0188035	0.0760936	-0.000374933	0.0012267	0.99756	-0.00520969	0.236699
SL007747	0.064649	0.0293598	0.0760936	0.00132797	0.00191089	0.99756	0.00438349	0.354077
SL000339	0.071058	0.0324042	0.0777062	0.000454084	0.00211488	0.99756	-0.0138746	0.00111158
SL011068	-0.0337723	0.0154123	0.0777715	0.000843151	0.00100902	0.99756	0.0343989	2.21e-13
SL002722	0.038809	0.0177149	0.0777715	0.000958771	0.00115394	0.99756	-0.00383279	0.33618
SL003848	0.0525322	0.0239864	0.0777715	0.000706107	0.00156117	0.99756	NA	NA
SL004820	-0.161063	0.0739008	0.0797144	-0.0042682	0.00481422	0.99756	NA	NA
SL000670	0.0765598	0.0352383	0.0809335	4.02901e-05	0.00229863	0.999692	-0.000151012	0.987311
SL000039	0.0503678	0.0232181	0.0814378	-0.000174881	0.00151288	0.99756	-0.0167969	0.000134457
SL000312	0.0457566	0.0211257	0.0819427	0.00146839	0.00138232	0.930941	NA	NA
SL000466	-0.0649635	0.030004	0.0819427	-0.00348876	0.00195649	0.489447	NA	NA
SL004339	0.0581572	0.0268698	0.0819427	-0.000219819	0.00174552	0.99756	-0.00703222	0.121384
SL003169	0.0505192	0.0234067	0.0830279	-0.00153088	0.00153059	0.96691	-0.0118006	0.000198794
SL007280	0.0340144	0.0157723	0.0832171	-0.00035521	0.00102853	0.99756	-0.0085061	0.0145279
SL000509	0.0366504	0.0170475	0.084448	0.000747962	0.00111505	0.99756	-0.0232327	4.39e-05
SL012538	-0.0333078	0.0155388	0.0854578	0.000321676	0.00101392	0.99756	0.0426694	3.49e-43
SL007295	-0.0304952	0.0142286	0.0854578	-0.000895312	0.000926746	0.977675	-0.000302162	0.931246
SL000437	0.0704102	0.0328608	0.0854578	-2.91807e-05	0.00213574	0.999692	-0.145398	1.76e-29
SL010371	0.0311479	0.0145523	0.0857643	-0.000485767	0.000949238	0.99756	-0.0112475	0.00111019
SL000556	0.0444678	0.0207846	0.085798	0.00142054	0.00135324	0.934646	NA	NA
SL005224	0.0567444	0.0265631	0.0863145	-0.00028113	0.00173619	0.99756	-0.00151983	0.598475
SL000451	0.0358491	0.0167925	0.0864365	0.00194844	0.00109429	0.489771	NA	NA
SL011809	0.0389962	0.0183104	0.0873647	0.000114021	0.0011931	0.99756	-0.0281634	0.000379807
SL004932	0.0482436	0.0228023	0.0902566	0.000700464	0.00148461	0.99756	NA	NA
SL010348	0.029016	0.0137478	0.0912191	0.00250527	0.000894938	0.0984169	-0.00279579	0.321496
SL006705	0.0454101	0.0215427	0.0915013	-0.000731539	0.00140396	0.99756	-0.00649686	0.0322431
SL003332	0.0392094	0.0186028	0.0915013	0.000567514	0.00121243	0.99756	-0.00822226	0.0212371
SL012148	0.0540447	0.0257676	0.093666	0.00117599	0.00167705	0.99756	-0.00452155	0.471995
SL011448	0.0401291	0.0192492	0.0964197	-6.86203e-05	0.00125629	0.99756	-0.00915081	0.00526334
SL010372	0.0499193	0.0239792	0.0969198	-0.00138012	0.00156364	0.99756	-0.0077672	0.00336449
SL019100	-0.102208	0.0492268	0.0980273	0.00111895	0.00320792	0.99756	NA	NA
SL006970	-0.0319109	0.0153979	0.0987555	-0.000148228	0.00100327	0.99756	0.0125975	0.000670905
SL004654	0.048093	0.0232249	0.0989616	-0.00136437	0.00151371	0.99756	-0.00461709	0.188533
SL005188	-0.0523419	0.025299	0.0992028	-0.00400361	0.0016466	0.195393	NA	NA
SL000344	-0.0509405	0.0246507	0.0995999	0.00298601	0.00160374	0.455664	NA	NA
SL007642	-0.0403103	0.0195591	0.100741	0.00123837	0.00127563	0.977675	0.0151043	4.76e-05
SL003803	0.0337893	0.0164694	0.102832	-0.0005784	0.00107604	0.99756	NA	NA
SL005177	0.0763378	0.037385	0.105048	0.00357752	0.00243374	0.704564	NA	NA
SL004511	-0.0774605	0.0382063	0.108549	-0.00165225	0.00248871	0.99756	-0.0232723	0.00208483
SL010508	0.0355593	0.0175912	0.109906	0.00018718	0.00114469	0.99756	-0.0157457	0.000639098
SL000384	0.0603582	0.0300248	0.112642	-0.00189126	0.00196443	0.977675	NA	NA
SL003764	-0.024349	0.0121326	0.113317	0.00313426	0.000785818	0.00386905	0.030335	5.45e-30
SL001943	0.0357279	0.0178157	0.113499	0.00230096	0.00115945	0.3766	NA	NA
SL014093	0.0439856	0.0220264	0.115572	-0.0011784	0.00143712	0.99756	-0.0190816	4.77e-06
SL002705	0.122286	0.0615651	0.11828	-0.000807692	0.00401213	0.99756	NA	NA
SL000022	0.0437485	0.0220699	0.119177	0.00155478	0.00143445	0.927251	-0.0212722	1.59e-13
SL005258	0.0493506	0.0249186	0.119454	-8.02295e-05	0.00162389	0.99756	-0.00707297	0.0343605
SL007223	0.0441884	0.0223421	0.119975	0.000307786	0.00145843	0.99756	NA	NA
SL004910	-0.0562236	0.0285497	0.122073	0.00189211	0.00185962	0.953569	0.0448763	4.93e-36
SL014148	0.0454242	0.0230784	0.122073	-0.000345022	0.00149969	0.99756	9.75e-05	0.982367
SL016557	0.0428323	0.0217649	0.122073	0.000311479	0.00142382	0.99756	0.00842307	0.0615609
SL009216	0.0378344	0.0192379	0.122209	-0.000265988	0.00125596	0.99756	-0.00212987	0.545747
SL010461	0.0521348	0.0265954	0.123795	-0.000391878	0.00173167	0.99756	-0.01578	0.000113857
SL004639	0.0262376	0.0134156	0.124878	0.000255931	0.000874696	0.99756	-0.00503965	0.329997
SL004752	0.0303766	0.0155939	0.126909	0.000760933	0.00101665	0.99756	-0.00328357	0.220275
SL011100	0.0512179	0.0263066	0.126971	-0.00038814	0.00171429	0.99756	-0.0134208	0.000828318
SL007195	0.0492696	0.025332	0.127327	0.00188167	0.00166232	0.910459	-0.00757421	0.0562954
SL018256	-0.0515548	0.0265412	0.12781	-0.00498962	0.0017217	0.0805197	NA	NA
SL006629	0.0661186	0.0340524	0.12781	0.00197447	0.00221792	0.99756	-0.0154453	0.00183379
SL010489	-0.0391116	0.0201813	0.128655	0.000601776	0.00131669	0.99756	-0.00776918	0.0131278
SL003199	0.025097	0.0129823	0.129855	-0.00152874	0.000845672	0.473387	-0.0167858	1.18e-09
SL005202	-0.110699	0.0572865	0.129855	0.00452775	0.00372617	0.834907	NA	NA
SL003176	0.0296205	0.0153488	0.13038	-0.000303508	0.00100297	0.99756	-0.0206721	0.000265621
SL004742	0.0270556	0.0140348	0.13076	0.00103658	0.000918381	0.910459	NA	NA
SL004148	0.0356052	0.0185473	0.132954	-0.000256009	0.00121225	0.99756	-0.00937603	0.00265373
SL010504	0.0671063	0.0349834	0.133154	-0.000635999	0.00228808	0.99756	-0.0226368	3.86e-05
SL004333	0.0441063	0.0231067	0.135805	-0.000433832	0.00150713	0.99756	-0.00833976	0.0275123
SL007871	-0.0333833	0.0175006	0.135829	-0.000671	0.00114242	0.99756	NA	NA
SL000318	0.0607699	0.0318682	0.135829	0.00180208	0.0020734	0.99756	NA	NA
SL007121	0.0452429	0.0237331	0.135829	0.000672194	0.00154226	0.99756	NA	NA
SL010619	0.0344372	0.0181906	0.139477	0.000729705	0.00118553	0.99756	NA	NA
SL012740	0.0353347	0.0186693	0.139477	-0.00134474	0.00121574	0.913579	-0.00807432	0.0221738
SL003647	0.0877179	0.0463572	0.139477	-0.000399278	0.00302108	0.99756	NA	NA
SL006675	-0.030416	0.0160808	0.139477	0.00190332	0.00105018	0.473387	0.00156709	0.620233
SL004747	-0.0439203	0.0232386	0.139688	-0.00233025	0.0015145	0.651633	NA	NA
SL005169	0.0326185	0.0172948	0.140687	-0.00152046	0.00112784	0.773557	NA	NA
SL004858	0.0390244	0.0207086	0.140935	0.00371678	0.00134468	0.103633	0.0172441	2.62e-09
SL014088	0.0442342	0.0235555	0.14279	-0.00216598	0.00153322	0.741173	-0.0205671	2.44e-09
SL004159	0.0349865	0.0186389	0.142792	0.000688496	0.00121369	0.99756	-0.0131848	9.77e-05
SL003863	0.0405999	0.0217582	0.146147	0.000370695	0.00142102	0.99756	-0.00235713	0.573478
SL010460	0.0745507	0.0401026	0.148173	0.00267035	0.002615	0.953569	-0.00238357	0.819
SL010451	0.0408744	0.0220002	0.148268	-0.00064603	0.00143565	0.99756	-0.000555514	0.909895
SL004850	0.0466011	0.0250969	0.148354	-0.000235665	0.00163848	0.99756	-0.00217003	0.690144
SL010471	0.0263014	0.0142013	0.149691	0.00155169	0.000923829	0.534991	0.000904238	0.785267
SL016548	0.050087	0.0270569	0.149718	-0.000301882	0.0017701	0.99756	-0.00907071	0.0227327
SL009213	-0.0535453	0.0289595	0.150182	0.000311132	0.00188727	0.99756	0.019246	0.000175823
SL010469	0.0297035	0.016073	0.150231	-2.04379e-05	0.00104806	0.999692	-0.0109559	0.000110088
SL009207	-0.021705	0.0117567	0.150585	0.00216025	0.000764043	0.0916001	0.0146343	2.31e-10
SL005160	-0.0433245	0.0235308	0.151787	-0.000217097	0.00153624	0.99756	NA	NA
SL004591	0.0499661	0.0271403	0.151787	-0.000403134	0.00177095	0.99756	-0.015892	4.57e-06
SL005235	0.0365713	0.0198934	0.152422	0.000985116	0.001297	0.99756	NA	NA
SL000310	0.0236036	0.0128542	0.152861	-1.88994e-05	0.000838634	0.999692	NA	NA
SL008094	-0.0468599	0.0255718	0.153878	0.00345576	0.00166476	0.318461	0.032686	1.2e-12
SL010502	-0.0834817	0.0456955	0.15551	0.000688357	0.00297746	0.99756	0.0134996	0.030808
SL003178	0.0402615	0.0221293	0.157457	-0.000216232	0.0014603	0.99756	-0.0109586	0.00741306
SL002731	-0.0239596	0.0131703	0.157457	0.00181795	0.000856651	0.301552	0.0305711	1.14e-21
SL010517	0.030111	0.0165544	0.157457	-0.000308921	0.0010795	0.99756	-0.0156373	0.000184398
SL000598	0.0649456	0.0357735	0.158376	0.000717505	0.00233125	0.99756	-0.0139707	0.00270728
SL005165	0.045458	0.0250523	0.15843	-0.000776028	0.00163541	0.99756	0.000438609	0.911775
SL014229	0.0447914	0.0246989	0.158517	-0.000674499	0.00162013	0.99756	NA	NA
SL003220	0.0193171	0.0107258	0.162641	0.00074848	0.00070182	0.930941	0.0011857	0.702275
SL000535	0.0894834	0.0497167	0.162761	-0.000657146	0.00323998	0.99756	-0.0266992	0.000353086
SL000125	0.0450726	0.0250592	0.16292	-0.00280598	0.00163047	0.515408	-0.00479763	0.417351
SL006916	0.0479405	0.0266832	0.163144	0.0032369	0.0017417	0.455712	-0.00285994	0.540366
SL007217	0.039729	0.0221195	0.163144	-0.000556115	0.00144061	0.99756	-0.0164177	2.84e-05
SL000525	0.0487262	0.0271444	0.163144	-0.000971757	0.00177191	0.99756	NA	NA
SL004704	0.0466025	0.0259646	0.163144	-0.000454833	0.00169074	0.99756	-0.00324713	0.409514
SL004144	0.0375206	0.0209619	0.164622	3.45254e-05	0.00136425	0.999692	-0.0110987	0.00134211
SL007274	-0.0245584	0.0137347	0.165017	-0.00128163	0.0008943	0.732521	-0.000820973	0.914602
SL009431	-0.063333	0.0354488	0.165252	-0.000135767	0.00231577	0.99756	0.0559112	4.45e-33
SL008380	-0.0287026	0.0160867	0.165822	0.00148326	0.0010492	0.741173	0.0138193	2.36e-05
SL000592	0.0204242	0.0114688	0.166768	-0.000629124	0.000748287	0.99756	NA	NA
SL002524	0.0329056	0.0185203	0.167811	-0.000542952	0.00120721	0.99756	-0.00175513	0.547558
SL001777	-0.0235129	0.0132362	0.167811	0.00114945	0.000863038	0.781509	NA	NA
SL003849	0.0361367	0.0203558	0.167949	-0.000540599	0.00132899	0.99756	NA	NA
SL004008	0.0391523	0.0220803	0.168415	-0.000335584	0.00144152	0.99756	NA	NA
SL016566	-0.0328156	0.0185681	0.170282	-0.00204894	0.00120972	0.533091	0.0114756	0.11221
SL007531	0.0445489	0.0252303	0.17038	-0.00031574	0.00164241	0.99756	NA	NA
SL003990	0.0548488	0.0310672	0.17038	0.0035619	0.00201715	0.498885	-0.0153371	0.0030177
SL005059	0.0193334	0.0110214	0.174289	-9.97496e-05	0.000719281	0.99756	-0.00353669	0.187157
SL010505	0.0464401	0.0265595	0.176121	0.000210153	0.00173382	0.99756	-0.00649998	0.130779
SL000001	0.036373	0.0208421	0.177104	0.00173988	0.0013562	0.794943	-0.00908273	0.0374133
SL005197	0.0437271	0.025079	0.177407	-0.00119805	0.00163114	0.99756	-0.00372242	0.257167
SL008072	0.072005	0.0414889	0.180153	0.000242923	0.00270768	0.99756	0.00343038	0.767645
SL004343	0.0425612	0.0245332	0.180153	-0.000930662	0.00159687	0.99756	NA	NA
SL008378	0.0664718	0.0383619	0.180646	-0.00183374	0.00249949	0.99756	-0.0133386	0.00368358
SL014209	0.0429098	0.0248099	0.181549	-0.000152873	0.0016172	0.99756	-0.00923035	0.00451923
SL007261	-0.0781375	0.0451961	0.181549	-0.00166807	0.00294496	0.99756	NA	NA
SL004354	0.0217151	0.012714	0.189456	0.000174898	0.000829835	0.99756	0.00387899	0.238596
SL004924	0.103147	0.0604373	0.189654	0.000378437	0.00393584	0.99756	NA	NA
SL004133	0.0328117	0.019423	0.196126	0.00053125	0.0012646	0.99756	NA	NA
SL001896	0.0254669	0.0150785	0.196126	-0.00116557	0.000982988	0.855538	-0.0151011	3.06e-14
SL004771	0.0519946	0.0308064	0.196126	8.58466e-05	0.00200974	0.99756	-0.00800856	0.0918886
SL005234	0.0615787	0.0364993	0.196126	-0.00106573	0.00237648	0.99756	-0.0107353	0.00877977
SL011071	0.0559532	0.033171	0.196126	0.000937007	0.00217195	0.99756	NA	NA
SL011510	0.0329737	0.0195621	0.1963	-0.00103135	0.00127421	0.99756	-0.0111819	0.000145062
SL003324	0.0233528	0.0138711	0.196812	0.00208343	0.000903856	0.236899	-0.00956022	0.00110821
SL004346	0.0400333	0.02379	0.196812	-0.000429882	0.00154978	0.99756	-0.00171887	0.613973
SL006480	0.0286714	0.0170679	0.197374	0.00185236	0.00111757	0.557707	NA	NA
SL005392	0.0388153	0.0231071	0.197374	-0.000831242	0.00150458	0.99756	NA	NA
SL004869	0.106129	0.0632069	0.197374	-0.00211201	0.00411866	0.99756	NA	NA
SL004342	0.0377582	0.0225024	0.197516	-0.0014439	0.00146927	0.972704	-0.015115	2.26e-05
SL000442	0.0559399	0.0334483	0.199397	-0.000496235	0.00217422	0.99756	-0.00698143	0.169998
SL000470	0.0439888	0.0263114	0.199397	-0.000715424	0.00171178	0.99756	-0.00435242	0.234973
SL002785	0.0857169	0.0513268	0.199813	-0.00959357	0.00333709	0.0839334	-0.117827	2.28e-48
SL000532	0.0728809	0.0436599	0.199813	0.000758107	0.00284522	0.99756	-0.016023	0.0204021
SL000406	-0.0353561	0.0212584	0.202027	0.00131087	0.00138864	0.987621	0.0441966	6.66e-26
SL012469	0.0428854	0.0257969	0.202027	0.00186456	0.00167919	0.913579	-0.0014651	0.78103
SL008023	0.0369635	0.0222524	0.202027	-7.86312e-05	0.00145113	0.99756	0.00237155	0.64006
SL014896	0.0515488	0.0310422	0.202027	0.000956549	0.00202526	0.99756	-0.00836063	0.175507
SL004648	0.0522158	0.0314532	0.202027	-0.000890949	0.0020483	0.99756	-0.0310743	2.15e-12
SL012881	-0.0287396	0.0173311	0.202479	0.00204423	0.00112566	0.473387	0.0123533	0.0115944
SL007806	0.0456577	0.0277166	0.206781	0.000209863	0.0018078	0.99756	NA	NA
SL008486	0.0292784	0.0177846	0.20689	-0.000113997	0.00116855	0.99756	-0.0115166	0.0027976
SL003872	0.0155851	0.00948751	0.207845	0.00053013	0.000618813	0.99756	0.00827496	0.000141484
SL011509	-0.0331423	0.0201781	0.207845	0.00294106	0.00131417	0.262052	0.0116657	0.009657
SL005263	-0.0436775	0.0266168	0.208161	0.000172168	0.00173674	0.99756	0.00241017	0.702752
SL011202	-0.0864171	0.0526876	0.208169	0.000777061	0.00343357	0.99756	NA	NA
SL014188	0.0387097	0.0236147	0.208257	-2.10126e-05	0.00153376	0.999692	NA	NA
SL005225	0.0448029	0.0273757	0.209052	-0.00170751	0.00178782	0.980919	-0.0177379	1.03e-05
SL018900	-0.0892431	0.0546566	0.210347	0.0093128	0.00354765	0.135777	NA	NA
SL002783	0.0332224	0.0203899	0.2115	0.000512285	0.00133095	0.99756	-0.0106598	0.000443514
SL004725	0.0567274	0.0348878	0.212624	0.00192563	0.00227117	0.99756	NA	NA
SL002640	0.0365023	0.0224757	0.213096	-0.000787743	0.00147379	0.99756	-0.00507512	0.20011
SL009791	-0.0426313	0.0262609	0.213096	0.000408957	0.00171288	0.99756	NA	NA
SL014735	-0.061676	0.0381068	0.214884	0.00104026	0.00248195	0.99756	0.0389139	2.61e-10
SL003679	0.0187043	0.0116003	0.217227	0.000282636	0.000756844	0.99756	NA	NA
SL009202	0.0379709	0.0235892	0.218094	0.00133138	0.00153677	0.99756	-0.00917442	0.046243
SL001995	0.0588789	0.0367751	0.221581	-0.000677159	0.00239654	0.99756	-0.0347544	4.9e-10
SL014092	0.0206057	0.0128944	0.22259	0.00279437	0.000837647	0.0296909	0.0257429	3.05e-22
SL013872	0.0242096	0.0151764	0.223037	0.00213518	0.000987383	0.286791	NA	NA
SL003171	0.0508174	0.0318624	0.223037	-0.000121275	0.00207585	0.99756	-0.0022625	0.540634
SL008414	0.0198297	0.0124345	0.223037	-0.00240065	0.000810521	0.0702298	-0.0329661	3.19e-43
SL002922	0.0482822	0.0303094	0.223484	-0.00166963	0.0019781	0.99756	NA	NA
SL004901	0.0236918	0.0149357	0.226183	-0.00147005	0.000971838	0.664685	NA	NA
SL000517	0.0397894	0.0251955	0.229034	0.00177102	0.00163879	0.927251	-0.00803208	0.0489536
SL018971	0.0430583	0.0273105	0.229881	0.000356466	0.00178247	0.99756	-0.00336249	0.546902
SL004097	-0.0628037	0.0399601	0.231805	0.000340362	0.00260418	0.99756	NA	NA
SL010500	-0.0889544	0.0567548	0.233448	0.00446481	0.003696	0.837843	-0.0104216	0.308012
SL004914	-0.0600716	0.0384587	0.235596	0.000502171	0.00250631	0.99756	NA	NA
SL005358	-0.056505	0.0363024	0.237652	0.00246999	0.00236454	0.936514	NA	NA
SL004925	0.0279979	0.0179973	0.237652	-0.00051808	0.00117261	0.99756	-0.0031011	0.320402
SL005437	0.0291523	0.0187438	0.237652	-0.0010495	0.0012201	0.99756	0.000582587	0.904821
SL004845	-0.0266926	0.017175	0.237826	-0.00156806	0.00111995	0.741173	NA	NA
SL010494	0.0394992	0.0254702	0.239045	0.000217328	0.00166248	0.99756	8.91e-05	0.974863
SL004396	-0.0779614	0.0503378	0.239646	0.00351151	0.00327863	0.929714	0.0229105	0.00211489
SL004856	0.0255197	0.0165128	0.240544	-0.000112598	0.00107685	0.99756	-0.00970678	0.0668702
SL000074	0.0277332	0.0179528	0.240544	0.00109583	0.00117234	0.988781	NA	NA
SL004230	0.0563994	0.036522	0.240544	-0.00128676	0.00237663	0.99756	NA	NA
SL006917	-0.0945247	0.0612282	0.240544	0.00437327	0.00398784	0.92273	-0.00195012	0.85423
SL014270	0.0249239	0.0161657	0.241148	0.00118736	0.00105403	0.910459	-0.018344	3.11e-07
SL004605	0.0348662	0.0226885	0.243191	-0.000190396	0.00147577	0.99756	NA	NA
SL004871	0.0187742	0.0122247	0.243289	6.28264e-05	0.000797922	0.99756	-0.00708536	0.00767565
SL007122	-0.0486263	0.0317076	0.243962	-0.00101148	0.0020693	0.99756	0.0173764	6.39e-06
SL006131	0.0330813	0.0216019	0.244642	0.00300504	0.00140606	0.296573	-0.000617324	0.911515
SL003774	0.0316295	0.0206669	0.244745	-8.47473e-05	0.00134515	0.99756	-0.00130966	0.763576
SL003735	0.0321273	0.0210099	0.245003	-0.000733496	0.00136886	0.99756	-0.00417619	0.326286
SL006542	0.0245637	0.0160946	0.245834	0.00328701	0.00104802	0.0475002	-0.0158883	2.3e-06
SL000051	0.0625153	0.0409699	0.245834	0.00298301	0.00267372	0.910459	-0.0747392	2.4e-11
SL002688	0.0377976	0.0248051	0.246481	-0.000541676	0.00161737	0.99756	NA	NA
SL001795	0.0448388	0.0294464	0.246626	-0.00114843	0.00191873	0.99756	-0.023067	6.97e-08
SL005204	0.0548613	0.0360744	0.247199	0.000717941	0.00235337	0.99756	NA	NA
SL001880	0.033997	0.0224052	0.248155	-8.04969e-05	0.00145995	0.99756	NA	NA
SL004660	-0.0589471	0.0388645	0.248155	-0.00154686	0.00253687	0.99756	0.010584	0.0884214
SL003167	0.0396375	0.026148	0.248155	-0.00610718	0.00169015	0.0138015	-0.0375551	3.63e-10
SL014096	0.0326645	0.0215495	0.248155	0.000655348	0.00140805	0.99756	NA	NA
SL000553	-0.103087	0.0684957	0.253021	0.00193456	0.00446346	0.99756	0.00170368	0.872118
SL013969	-0.0402695	0.0268742	0.255536	-0.000862393	0.0017536	0.99756	-0.0026916	0.428054
SL010459	0.175771	0.117334	0.255536	0.0107454	0.00763906	0.741173	-0.021826	0.274828
SL005185	-0.0403991	0.0269751	0.255536	0.00277712	0.00175891	0.626894	0.0243961	2.5e-14
SL008590	0.0361215	0.0242044	0.257669	-0.000795299	0.00157467	0.99756	NA	NA
SL008176	-0.0465017	0.0311711	0.257669	0.00139808	0.00202979	0.99756	0.0319864	3.83e-15
SL005846	0.0312401	0.0209754	0.258518	0.000675551	0.0013646	0.99756	NA	NA
SL000570	0.0341378	0.0230775	0.263201	0.000668796	0.00150221	0.99756	NA	NA
SL011772	0.0453174	0.0306739	0.263765	-0.000138121	0.00199643	0.99756	-0.00475456	0.29411
SL003104	0.0360603	0.0244353	0.264215	0.000382548	0.00159849	0.99756	-0.00569371	0.172256
SL004782	-0.0232414	0.0157688	0.264456	-0.00368063	0.00102136	0.0138015	0.00264328	0.572319
SL007284	0.0369544	0.025075	0.264456	-0.000409528	0.00163464	0.99756	-0.00806326	0.0812059
SL010368	0.0332204	0.022579	0.265314	-0.000274049	0.00147409	0.99756	-0.0311135	7.18e-12
SL014292	0.0353256	0.0240775	0.267043	7.97936e-08	0.00157549	0.99996	NA	NA
SL008709	0.0335909	0.0229416	0.268164	-0.00115328	0.00149457	0.99756	-0.010057	0.0389213
SL005207	0.0249186	0.0170315	0.268347	0.00151334	0.00111354	0.773557	NA	NA
SL004253	0.0297859	0.0203971	0.26938	-0.00269448	0.00133058	0.352928	-0.00416256	0.243055
SL005308	0.0481743	0.0330809	0.27107	0.00228443	0.00215085	0.930941	-0.00794335	0.0530519
SL000526	-0.029866	0.0205291	0.271424	0.002436	0.00133752	0.473387	NA	NA
SL010524	-0.0434537	0.0299166	0.272226	0.00176774	0.00194701	0.99756	0.0477041	4.47e-22
SL007024	0.0438586	0.0302194	0.272393	-3.39724e-05	0.00196845	0.999692	NA	NA
SL016828	0.0456992	0.0315053	0.272393	-0.00163486	0.00204883	0.99756	NA	NA
SL000158	0.0530078	0.036559	0.272393	0.000436939	0.00237925	0.99756	0.000730645	0.93174
SL004672	0.0230087	0.0159236	0.274576	-0.000691881	0.00103876	0.99756	-0.000201971	0.962705
SL002522	0.0319314	0.0221141	0.274713	-0.00231489	0.00143746	0.603567	-0.0200153	1.95e-08
SL014094	0.0297758	0.0206707	0.275842	0.000617731	0.00134693	0.99756	0.00122307	0.749637
SL003703	-0.0243037	0.0168745	0.275842	0.000338487	0.00109774	0.99756	-0.000302276	0.928922
SL008760	0.0332427	0.0231285	0.276858	-0.000477886	0.00150946	0.99756	NA	NA
SL004400	0.0176178	0.0122618	0.276858	0.00232089	0.000796188	0.0780708	NA	NA
SL004536	-0.0951122	0.0664084	0.278854	0.0228108	0.0042812	2.28586e-05	0.065449	5.51e-06
SL002695	0.0488666	0.0341964	0.280153	-0.000644731	0.00222956	0.99756	-0.022842	2.5e-09
SL000401	0.043029	0.0301498	0.280721	0.000884703	0.00196386	0.99756	NA	NA
SL008588	0.0340295	0.0238601	0.28083	-0.000353979	0.0015538	0.99756	NA	NA
SL004739	-0.0639159	0.0448912	0.281708	-0.0025391	0.0029297	0.99756	NA	NA
SL005170	0.0371168	0.0260883	0.281874	-1.55901e-05	0.00170395	0.999692	NA	NA
SL005694	-0.0757036	0.0533138	0.282538	0.00121138	0.00347426	0.99756	NA	NA
SL009328	-0.0342022	0.0240891	0.282538	0.000945248	0.00156907	0.99756	0.0251092	1.16e-10
SL015510	0.0542463	0.0382223	0.282538	0.00101842	0.00249075	0.99756	-0.0160583	0.0292976
SL005250	0.0360895	0.0254639	0.282626	-0.000269423	0.00166009	0.99756	-0.00879654	0.0105796
SL010250	-0.0641757	0.0452865	0.282626	0.00131323	0.00295104	0.99756	0.0278521	6.9e-08
SL000560	-0.0378408	0.026708	0.282626	-0.000100834	0.00174056	0.99756	0.0290161	8.99e-14
SL009629	0.0435855	0.0308283	0.283828	-0.000432241	0.00200777	0.99756	-0.0026132	0.542759
SL001992	-0.0224366	0.0159341	0.28622	0.000718361	0.00103991	0.99756	-0.00304818	0.394128
SL005153	0.0160277	0.0113848	0.28622	0.00185608	0.000740335	0.167133	NA	NA
SL000537	0.0742795	0.0529131	0.287959	0.00059931	0.00344831	0.99756	-0.0219647	0.0126275
SL007361	0.0303504	0.0216857	0.289835	-3.18328e-05	0.00141958	0.999692	0.00335248	0.462774
SL008822	0.0251559	0.0179898	0.290085	0.0033415	0.0011687	0.0854906	NA	NA
SL003309	0.015348	0.0110137	0.292269	-0.000309416	0.000718923	0.99756	NA	NA
SL002539	0.0252266	0.0181452	0.293301	0.00145014	0.00118362	0.828768	NA	NA
SL016555	-0.0507979	0.0365416	0.293301	-0.000504648	0.00238137	0.99756	NA	NA
SL005228	0.0356443	0.0256663	0.293649	-0.000343906	0.00167046	0.99756	-0.00911333	0.0732913
SL010928	-0.0348835	0.0251893	0.295357	0.0013052	0.00164013	0.99756	-0.00316672	0.21782
SL018946	0.0219871	0.0159307	0.297503	0.00179402	0.00104004	0.513431	-0.00339137	0.247338
SL004860	-0.0384312	0.0278638	0.29754	-7.88313e-05	0.0018156	0.99756	0.00509662	0.221193
SL002093	-0.032618	0.0236605	0.29754	0.000884579	0.00153889	0.99756	0.00120664	0.769453
SL011069	-0.0215842	0.0156725	0.29754	-0.00278112	0.00102427	0.112407	NA	NA
SL006378	-0.0594421	0.0431637	0.29754	0.000320978	0.00281297	0.99756	0.0300509	3.37e-13
SL002078	-0.0433246	0.0315484	0.299184	-0.000150398	0.00205124	0.99756	-0.0100945	0.0655852
SL004101	-0.0772253	0.0562604	0.299184	0.00269268	0.0036655	0.99756	0.018474	0.0030177
SL003310	0.0520311	0.037947	0.299443	-0.000988684	0.00247088	0.99756	NA	NA
SL009948	0.0176433	0.0128718	0.299443	0.000430437	0.000840241	0.99756	-0.00263044	0.312091
SL008193	-0.0306078	0.022357	0.299937	0.000516619	0.00145653	0.99756	NA	NA
SL003280	-0.0281837	0.0206116	0.300454	-0.000472202	0.00134688	0.99756	0.00997228	0.160837
SL010488	-0.0217052	0.0159027	0.301417	-0.00128879	0.00103641	0.823609	0.00070601	0.838134
SL003704	-0.0545247	0.0400015	0.302005	-0.000950534	0.00260517	0.99756	0.0110492	0.0391623
SL004714	0.0157929	0.0116495	0.305678	0.000230588	0.00075979	0.99756	0.0203997	4.82e-12
SL000603	0.0334328	0.024721	0.307082	-0.000738492	0.00161283	0.99756	-0.031149	7.77e-12
SL003919	0.0214422	0.0158799	0.307859	-0.00144054	0.0010371	0.748609	NA	NA
SL006803	0.0318645	0.0236708	0.309746	-8.60036e-05	0.00154015	0.99756	NA	NA
SL007221	-0.0626099	0.0465578	0.309858	0.00143584	0.00303384	0.99756	-0.00731126	0.257319
SL007136	0.0283546	0.0210897	0.309858	-0.00147092	0.00137325	0.929714	NA	NA
SL001720	-0.0217851	0.0163226	0.31426	0.00175929	0.00106694	0.565181	0.00976169	0.00317211
SL000450	-0.0675657	0.0506323	0.31426	-0.0019391	0.00329914	0.99756	NA	NA
SL008865	0.0220952	0.0165579	0.31426	0.00153737	0.00107846	0.735431	0.0264902	7.37e-19
SL013754	-0.0342126	0.0257535	0.317215	-0.00196953	0.00167999	0.867368	0.00590988	0.32833
SL003726	0.0688715	0.0519973	0.319041	-0.00227743	0.00340583	0.99756	NA	NA
SL005159	0.0339264	0.0256432	0.319477	-0.00112118	0.00167921	0.99756	NA	NA
SL008143	-0.0669497	0.0510261	0.325337	0.000574897	0.00332533	0.99756	0.0533182	8.18e-22
SL000540	0.0316664	0.0243247	0.330516	-0.0011022	0.00158989	0.99756	-0.0124709	0.000301836
SL004750	-0.0654605	0.0502896	0.330516	0.00147076	0.00327705	0.99756	NA	NA
SL018921	-0.0467091	0.0360158	0.332665	-0.000884459	0.00234699	0.99756	-0.00885941	0.025806
SL004119	0.0217282	0.0167587	0.332665	-0.000498465	0.00109045	0.99756	NA	NA
SL002541	0.0221663	0.0171199	0.333261	-0.00107259	0.00111989	0.980583	NA	NA
SL003182	0.0222189	0.0172681	0.337582	-0.000747674	0.00112715	0.99756	-0.0225367	3.81e-06
SL016554	-0.0306781	0.0239535	0.340692	0.00138018	0.00155806	0.99756	0.00390964	0.46267
SL003520	0.0248962	0.0194532	0.340799	0.000813164	0.00127028	0.99756	-0.00259473	0.557473
SL010490	0.0250389	0.0195761	0.340802	-0.00151198	0.0012772	0.855657	-0.0119902	0.00716369
SL002086	-0.0768181	0.0601109	0.341019	0.000151574	0.00392333	0.99756	NA	NA
SL003172	0.0506341	0.0396489	0.3411	0.00269123	0.00258077	0.936514	NA	NA
SL001800	-0.0209642	0.0164259	0.341116	9.55358e-05	0.00107203	0.99756	-0.00603681	0.0517509
SL002505	0.0374424	0.0293653	0.341408	-0.000813825	0.00191113	0.99756	-0.0151419	1.19e-06
SL000396	-0.027413	0.0215479	0.342678	0.00220383	0.00140273	0.628228	0.024572	4.56e-09
SL003331	0.0274264	0.0215735	0.342772	-0.00135807	0.0014129	0.977761	0.000927749	0.83637
SL004156	0.0359791	0.0286026	0.350393	-0.000297888	0.00186296	0.99756	-0.00244241	0.623306
SL007250	0.0274972	0.0219514	0.353137	-0.000246754	0.00143297	0.99756	-0.0229855	1.16e-05
SL009951	0.0331372	0.0264877	0.353334	0.00129565	0.0017304	0.99756	-0.00606647	0.188015
SL002756	0.032147	0.0257005	0.353334	8.21277e-05	0.0016743	0.99756	NA	NA
SL003188	0.0341965	0.0273906	0.354317	-0.00176273	0.00178424	0.972704	-0.0133359	0.0420834
SL012188	0.0470829	0.0378107	0.355423	0.000387561	0.0024641	0.99756	-0.0174064	1.23e-05
SL008611	-0.0370322	0.0297406	0.355423	-0.00100549	0.00193763	0.99756	-0.00353994	0.674975
SL001997	-0.0164942	0.0132689	0.356257	-0.00295665	0.000862255	0.0228023	0.00106628	0.869549
SL009988	0.031277	0.0252193	0.357559	-0.000192843	0.001642	0.99756	-0.0332938	6.06e-14
SL003658	-0.077525	0.0627187	0.359638	0.00102001	0.00408726	0.99756	NA	NA
SL000306	0.0345978	0.0280658	0.361241	-0.000608763	0.00183625	0.99756	-0.00632086	0.0437434
SL001905	0.0463567	0.0376615	0.361372	0.000563313	0.0024511	0.99756	-0.00392344	0.503297
SL014289	0.0393463	0.0319802	0.361372	0.000203063	0.00207943	0.99756	-0.00871296	0.0584555
SL017188	-0.0659982	0.0536443	0.361372	0.00155275	0.00349566	0.99756	NA	NA
SL004353	0.0275555	0.0224873	0.363956	-0.000410888	0.00146622	0.99756	-0.019235	2.84e-05
SL004781	-0.0784587	0.0643814	0.367484	0.00302945	0.00419464	0.99756	-0.00645847	0.554562
SL019979	-0.0382313	0.0313826	0.367484	0.00101838	0.0020515	0.99756	0.00594963	0.23441
SL010349	0.0362425	0.0298609	0.369842	0.00529896	0.00193776	0.107413	NA	NA
SL007022	0.0231471	0.0191037	0.370665	-0.00053892	0.00124633	0.99756	-0.0149862	0.0076574
SL007356	0.0339714	0.0280907	0.371655	-0.0011175	0.00183469	0.99756	NA	NA
SL000546	0.0330084	0.0273649	0.373111	-0.00454519	0.00177688	0.152462	-0.035276	2.07e-15
SL003522	0.0243974	0.0202377	0.373111	0.00330389	0.00131728	0.167133	NA	NA
SL005171	0.0170648	0.0141844	0.374202	-0.00168405	0.000923545	0.473387	NA	NA
SL008113	-0.0722438	0.06028	0.375146	0.00298276	0.00392731	0.99756	NA	NA
SL005189	0.0276508	0.023078	0.375146	-0.000394142	0.0015093	0.99756	-0.00350222	0.398949
SL011808	-0.0694295	0.0579483	0.375146	0.00185632	0.00377604	0.99756	0.036235	0.00116117
SL008421	0.0329937	0.0275527	0.375146	-0.00167112	0.00179413	0.988781	-0.00283523	0.484668
SL000316	0.0251159	0.020974	0.375146	0.00319719	0.00136675	0.226753	-0.00747244	0.108936
SL004642	0.0335889	0.028088	0.375146	0.0015409	0.00183859	0.99756	-0.00842895	0.264536
SL000137	0.031262	0.0261437	0.375146	0.00109966	0.00170138	0.99756	NA	NA
SL004183	-0.0119746	0.0100152	0.375146	0.0006968	0.000654171	0.930941	-0.00399347	0.160677
SL007145	0.032412	0.027135	0.375419	0.00126437	0.00176968	0.99756	-0.00273904	0.512251
SL005215	0.0287604	0.0241199	0.376263	0.00155538	0.0015766	0.972704	-0.000121167	0.986839
SL010515	0.0586415	0.0493183	0.377914	7.32591e-05	0.00321408	0.999692	NA	NA
SL000601	0.00877503	0.00742129	0.381492	-0.000204134	0.000484425	0.99756	0.000430186	0.837192
SL008071	-0.0302499	0.0255936	0.381492	-1.57452e-05	0.00166699	0.999692	-0.00598485	0.0346872
SL012774	-0.0196025	0.0166019	0.381784	0.00189742	0.00108176	0.500615	-0.00157732	0.705375
SL011770	-0.0179438	0.0152246	0.382542	0.000785949	0.000992563	0.99756	0.00912327	0.000429071
SL009628	-0.0563335	0.0478283	0.382542	0.00162377	0.00311656	0.99756	0.0184768	0.000125009
SL003753	0.0433542	0.0368384	0.382542	-0.00433416	0.00238921	0.473387	-0.00901347	0.130975
SL004081	0.0205557	0.0174761	0.382542	0.000731649	0.00114073	0.99756	0.0156925	7.5e-09
SL004349	0.0278716	0.0237182	0.382542	-0.000772292	0.00154213	0.99756	-0.00819522	0.00589041
SL011532	-0.0322953	0.0274953	0.382542	-0.00278886	0.00179086	0.63578	-0.00017009	0.976688
SL005233	0.0245372	0.0208936	0.382542	-0.000621965	0.00136132	0.99756	0.000801272	0.869953
SL007336	0.0228327	0.0194972	0.384186	0.00178892	0.00127002	0.741173	NA	NA
SL000456	0.0179847	0.0153944	0.385511	0.00188701	0.00100326	0.440602	NA	NA
SL005181	0.024727	0.0211986	0.386208	-0.000239153	0.0013806	0.99756	NA	NA
SL003173	0.0426056	0.036777	0.390847	0.00121062	0.00239657	0.99756	-0.026536	6.74e-07
SL000605	-0.044549	0.0387879	0.396825	0.00139158	0.00252647	0.99756	0.0424601	6.11e-15
SL011049	0.0132921	0.0116256	0.399727	6.94804e-05	0.000757923	0.99756	-0.0200485	2.38e-11
SL008102	-0.0391064	0.0343603	0.402666	0.000492729	0.00223921	0.99756	0.043533	1.41e-28
SL010510	0.0336604	0.029739	0.406262	-0.000681679	0.00193798	0.99756	-0.0089686	0.00270517
SL004208	-0.0200247	0.0177059	0.406262	0.000842971	0.0011546	0.99756	0.0235674	0.0227307
SL004139	-0.015523	0.0137316	0.406262	-0.00108434	0.000894059	0.835782	0.00818536	0.0184775
SL000011	0.0227764	0.0202675	0.410193	0.000148421	0.00132153	0.99756	0.00699004	0.0824784
SL004984	0.0219723	0.0195715	0.410444	-0.000841092	0.0012732	0.99756	0.00152246	0.769983
SL003655	-0.0474997	0.0424062	0.411649	0.00187588	0.00276298	0.99756	0.0410613	4.53e-17
SL014468	-0.027287	0.0244183	0.412911	0.000784044	0.0015955	0.99756	-0.0132997	0.0401498
SL000655	0.0296801	0.0266038	0.41365	-0.000674269	0.00173544	0.99756	-0.00331317	0.444946
SL000027	0.0271295	0.0244013	0.415714	-0.000739712	0.00159445	0.99756	NA	NA
SL014091	0.0403363	0.0363211	0.416065	-0.0033423	0.00236103	0.741173	NA	NA
SL003201	0.0121606	0.0109646	0.416544	0.00114134	0.000714679	0.614202	-0.0108545	1.95e-07
SL000017	-0.0413637	0.0374075	0.41816	0.00464895	0.00243338	0.423191	NA	NA
SL003648	-0.0429379	0.0388693	0.41816	0.0014432	0.0025327	0.99756	NA	NA
SL007651	0.0279235	0.0252951	0.41816	-0.000572075	0.0016506	0.99756	-0.0237747	1.55e-06
SL004687	0.0325363	0.0294791	0.41816	-0.000532025	0.00191982	0.99756	0.00622486	0.0644246
SL002650	-0.0631341	0.0572664	0.418498	0.00135584	0.00373182	0.99756	NA	NA
SL006993	0.0266013	0.0242594	0.421993	0.00223522	0.00157715	0.741173	0.0155865	0.0465253
SL014684	0.033598	0.0307253	0.423548	-0.00037727	0.00200161	0.99756	-0.00263825	0.702275
SL003739	0.0245422	0.0224704	0.423733	0.00189499	0.0014644	0.792481	0.00191404	0.631337
SL004415	0.0289414	0.0265095	0.423733	-0.000296318	0.00172687	0.99756	0.000298407	0.947302
SL005687	-0.0441959	0.0405417	0.424314	0.00184009	0.00264146	0.99756	0.0411495	4.35e-16
SL000674	0.0282027	0.0259327	0.425574	0.000148177	0.00169306	0.99756	-0.00696196	0.0371867
SL000345	0.0274568	0.0252909	0.426361	-0.000829326	0.0016519	0.99756	-0.0107125	0.00417425
SL004330	0.0254048	0.0234812	0.428379	-0.00112298	0.00153182	0.99756	-0.0129492	0.000222373
SL007869	0.0225952	0.0209494	0.429677	-0.00049906	0.00137379	0.99756	-0.0254427	9.08e-15
SL000064	-0.019712	0.0182767	0.429677	0.000751629	0.00119054	0.99756	0.0143331	0.000564309
SL011180	0.0235935	0.0218985	0.429951	-8.00206e-05	0.00142321	0.99756	-0.0213792	7.58e-08
SL003646	-0.0587377	0.0547236	0.432203	0.00271617	0.0035653	0.99756	NA	NA
SL004812	-0.0527335	0.0491668	0.43225	0.00173153	0.00320374	0.99756	0.0409491	5.34e-14
SL017189	0.0178203	0.0167037	0.435625	0.00242628	0.00108752	0.263284	NA	NA
SL006694	0.0414067	0.0388381	0.435625	0.00198605	0.0025303	0.99756	NA	NA
SL005206	0.0254817	0.0239285	0.43596	-0.000669621	0.0015614	0.99756	-0.0111089	5.08e-06
SL007237	-0.0209029	0.0197479	0.439869	-0.000885079	0.00128878	0.99756	0.0236524	5.3e-09
SL007547	0.0186429	0.0176277	0.439975	-0.00169057	0.00114934	0.704564	-0.017626	4.43e-06
SL000557	0.0343544	0.0325544	0.440997	-0.00216064	0.0021165	0.953569	-0.00868421	0.0150577
SL006268	0.0474972	0.0450368	0.440997	-0.000750167	0.00293496	0.99756	NA	NA
SL004837	0.0210304	0.0200828	0.445647	0.000323927	0.00130838	0.99756	0.00150901	0.784197
SL015728	0.0244412	0.0234954	0.448395	0.000529391	0.00154066	0.99756	-0.00152088	0.680964
SL000337	-0.0452975	0.0435542	0.448395	0.00142565	0.00283808	0.99756	NA	NA
SL004765	-0.0425334	0.0409048	0.448395	-0.000587904	0.00266571	0.99756	-0.0302085	5.45e-07
SL008085	0.0286849	0.0276077	0.448395	-0.00244988	0.0017989	0.773557	NA	NA
SL008835	0.0215228	0.020731	0.448395	-0.000362818	0.00134874	0.99756	-0.0195879	1.45e-05
SL005193	-0.0161092	0.0155177	0.448395	0.000188772	0.00101349	0.99756	-0.0118254	1.87e-05
SL007181	0.0240853	0.0232105	0.448395	0.00167536	0.00151362	0.913579	-0.0106423	0.00119253
SL005218	0.0140586	0.013553	0.448395	0.00355464	0.000878008	0.00319615	-0.000808778	0.796012
SL000493	0.0291963	0.0282751	0.451171	0.00127557	0.00184162	0.99756	0.0253882	1.73e-07
SL003717	0.0163728	0.0159305	0.454026	-0.000943423	0.00104068	0.99756	-0.0105384	0.00487732
SL008039	-0.0333319	0.0325592	0.456198	3.52479e-05	0.00212189	0.999692	0.0298916	8.67e-08
SL006132	0.0268942	0.0262847	0.456198	-0.00145533	0.0017139	0.99756	0.00103673	0.766316
SL004345	0.0179442	0.0175636	0.456746	-6.58914e-05	0.00114683	0.99756	NA	NA
SL003168	-0.0192351	0.0189097	0.459366	-0.00159215	0.00123428	0.792481	-0.00171417	0.620923
SL003722	-0.047492	0.0467618	0.459963	0.00295126	0.00304604	0.977675	-0.00860429	0.225677
SL004010	0.0195021	0.0192533	0.461343	-0.000868871	0.00125452	0.99756	-0.0392912	8.67e-23
SL016563	0.0202579	0.0200307	0.461939	0.000388594	0.00130668	0.99756	0.00238632	0.574996
SL000088	0.0311241	0.0309896	0.46638	-0.00151551	0.00201679	0.99756	-0.0101784	0.00977526
SL004489	0.0251057	0.0250842	0.468336	-0.000980827	0.00162639	0.99756	-0.00558683	0.389463
SL012457	0.0174629	0.0174782	0.468545	-0.000265771	0.00114427	0.99756	-0.0188391	1.22e-06
SL010463	0.0257833	0.0258073	0.468545	-0.000568376	0.00168073	0.99756	NA	NA
SL004757	-0.054991	0.0552339	0.470487	0.00258522	0.00359866	0.99756	0.038525	4.93e-10
SL000138	0.0252538	0.0253983	0.470881	-0.00223169	0.00165468	0.773557	NA	NA
SL000309	0.0225614	0.0227905	0.473476	0.00171621	0.00149557	0.896243	NA	NA
SL001729	0.0174535	0.0176804	0.474936	-0.0004604	0.00116025	0.99756	NA	NA
SL005034	0.0693387	0.0703769	0.475778	-0.00112792	0.00458634	0.99756	NA	NA
SL011529	-0.0562016	0.0574263	0.47998	0.00127054	0.00374227	0.99756	NA	NA
SL010518	-0.0487985	0.0499117	0.480147	0.00155115	0.00325238	0.99756	NA	NA
SL005194	-0.0352525	0.03611	0.480651	0.000197107	0.00235329	0.99756	0.0191467	1.75e-06
SL006914	0.0333128	0.0341703	0.480863	0.00164407	0.00222214	0.99756	NA	NA
SL000551	-0.061736	0.0633575	0.480863	0.00209593	0.00412848	0.99756	-0.0228315	0.0294855
SL004863	-0.0190352	0.0195488	0.480863	0.000432697	0.00128101	0.99756	0.0183246	2.64e-07
SL007560	0.0228982	0.0235381	0.480984	-0.000206907	0.00153564	0.99756	-0.0187831	4.83e-06
SL013570	-0.0140701	0.0145199	0.483188	0.000191106	0.000947127	0.99756	0.0055012	0.0983225
SL000084	-0.0314348	0.0325799	0.48567	0.00160687	0.00212232	0.99756	0.0107482	0.0327401
SL000377	0.0284525	0.0296609	0.489198	0.000143516	0.00192871	0.99756	-0.0189134	0.00231226
SL011533	0.0529317	0.0553792	0.491172	-0.00353459	0.00360732	0.972922	-0.0230528	3.21e-06
SL010376	0.0242174	0.0254155	0.492781	0.000545866	0.0016569	0.99756	-0.00944526	0.0168514
SL012108	0.0153082	0.0161241	0.49469	-0.00249974	0.00105445	0.212275	0.00879453	0.0120303
SL000496	-0.0216957	0.0228675	0.49469	-0.00192227	0.00148821	0.792481	-0.0243139	1.28e-06
SL004676	-0.011239	0.0118969	0.49712	-0.000193349	0.000776095	0.99756	NA	NA
SL000409	-0.0432988	0.0458935	0.49748	0.00248998	0.00298984	0.99756	0.0238797	0.00191929
SL009341	0.016256	0.017251	0.497706	5.36536e-05	0.00112536	0.99756	NA	NA
SL011404	0.0169911	0.0180437	0.497706	0.000952819	0.00117614	0.99756	-0.00963246	0.0464739
SL004589	0.0290477	0.0308961	0.498248	-0.00140518	0.00201255	0.99756	NA	NA
SL004940	0.0477164	0.0511376	0.502479	0.00180969	0.00333215	0.99756	NA	NA
SL010509	-0.0645785	0.0692205	0.502479	0.00155525	0.00451084	0.99756	NA	NA
SL010512	0.0261993	0.0281413	0.502964	0.000102475	0.00182938	0.99756	-0.0180536	7.35e-07
SL004140	0.0112252	0.0120787	0.502964	0.000384749	0.000788231	0.99756	0.00785035	0.00421349
SL000523	0.021446	0.0230871	0.502964	0.00387641	0.00149513	0.141273	-0.00535915	0.300051
SL003653	0.0247061	0.0266023	0.502964	-0.000712482	0.00173319	0.99756	-0.0133848	0.0039529
SL008122	0.0478206	0.0515005	0.502964	-0.000798978	0.0033562	0.99756	NA	NA
SL001999	0.0293385	0.0318349	0.507562	-0.000885773	0.00207232	0.99756	NA	NA
SL000645	-0.0221424	0.0241203	0.509668	-0.00360632	0.00156945	0.236899	-0.00222813	0.700063
SL000357	0.0110306	0.012078	0.511966	0.00245109	0.000784169	0.0475002	NA	NA
SL017610	0.0427825	0.0468547	0.511966	0.00201594	0.00305286	0.99756	NA	NA
SL002792	-0.0481505	0.0527946	0.511966	0.000225748	0.00344063	0.99756	0.00956363	0.348416
SL014308	0.0362045	0.0397016	0.511966	-0.00166638	0.00258646	0.99756	-0.0015247	0.776404
SL008008	0.0276225	0.0304972	0.516014	0.000172044	0.00199367	0.99756	NA	NA
SL003793	0.0198409	0.021981	0.51777	-0.0011396	0.00143123	0.99756	0.00604903	0.220275
SL003690	0.0184493	0.0205328	0.520021	8.94117e-05	0.00134477	0.99756	NA	NA
SL006924	0.0137797	0.0153481	0.520021	0.00190381	0.00100083	0.426323	0.00611044	0.209421
SL000313	0.0331358	0.0369244	0.520021	0.00514757	0.00241855	0.299031	NA	NA
SL000480	0.0219377	0.0244822	0.52045	-0.000696474	0.00159616	0.99756	0.000519203	0.88311
SL002803	-0.0314254	0.0352271	0.522879	-0.000228878	0.00229569	0.99756	NA	NA
SL011709	-0.0454969	0.0511052	0.523684	0.00103881	0.00333037	0.99756	0.0446999	7.06e-16
SL001897	0.0269054	0.0304144	0.527362	-0.000514398	0.00198204	0.99756	0.00327297	0.361719
SL004334	-0.0432751	0.0489839	0.527681	0.00221944	0.00319151	0.99756	0.0367544	4.71e-14
SL010381	-0.0155537	0.0176773	0.528947	-0.00265735	0.0011504	0.236618	NA	NA
SL002782	-0.0143615	0.0163239	0.528947	0.000425639	0.00106407	0.99756	0.00280296	0.33712
SL006830	-0.0163351	0.0185726	0.528947	-0.000319229	0.00121089	0.99756	NA	NA
SL003302	-0.0154126	0.0176154	0.53184	-0.000788285	0.00114808	0.99756	-0.010438	0.00523913
SL000136	-0.044114	0.050512	0.532493	0.00194187	0.0032913	0.99756	0.0393647	3.57e-13
SL000459	-0.0223657	0.0257847	0.536428	-0.000275182	0.00168286	0.99756	NA	NA
SL004814	0.0161423	0.0187288	0.540051	0.000604723	0.00122078	0.99756	-0.00349178	0.301773
SL004821	0.0168966	0.0196522	0.541091	0.00379073	0.00127687	0.0702298	0.0374654	6.78e-18
SL002654	-0.0132245	0.0154086	0.54168	-0.000359611	0.00100433	0.99756	0.00512551	0.173723
SL001945	-0.0200144	0.0233628	0.54231	0.00109723	0.00152216	0.99756	0.0327063	5.46e-12
SL010374	0.0392865	0.0461463	0.545814	-0.000203498	0.00300736	0.99756	NA	NA
SL004355	-0.0148194	0.0174588	0.547173	-0.00053079	0.00114103	0.99756	-0.00496264	0.212335
SL007620	0.0246314	0.0291308	0.549112	0.000300399	0.00190134	0.99756	0.00254251	0.679583
SL000460	-0.0792597	0.0939231	0.549811	-0.0169088	0.0060974	0.102208	NA	NA
SL004009	-0.0495333	0.0589529	0.551379	0.00208773	0.0038414	0.99756	NA	NA
SL003303	0.0290174	0.034536	0.551379	-0.00347569	0.00224962	0.646094	-0.0597972	7.9e-30
SL000521	-0.0391008	0.0465721	0.551379	-0.00213763	0.00303206	0.99756	NA	NA
SL012769	-0.0349065	0.0417155	0.552953	0.0054861	0.0027179	0.355169	0.0121625	0.152435
SL000247	-0.0480916	0.0576203	0.553931	-0.00642151	0.00374959	0.522202	NA	NA
SL006923	0.0158347	0.0189865	0.553931	0.000211642	0.00124357	0.99756	-0.00292785	0.480754
SL005588	-0.042802	0.0514668	0.554007	0.00141617	0.0033538	0.99756	NA	NA
SL003700	-0.0429498	0.051654	0.554007	0.00204381	0.00336567	0.99756	0.0393959	2.65e-12
SL011073	-0.0406702	0.0489498	0.554007	0.000634768	0.00319001	0.99756	-0.00017373	0.986315
SL005178	0.014302	0.0172226	0.554007	-0.000928728	0.00112863	0.99756	-0.0203328	4.53e-05
SL002684	0.0133438	0.0160801	0.554007	3.66698e-05	0.00104798	0.998775	NA	NA
SL000497	0.0192702	0.0232348	0.554007	0.00255538	0.00151424	0.53471	0.0183106	7.53e-08
SL005222	0.0277032	0.0336144	0.55745	-0.000496751	0.0021883	0.99756	NA	NA
SL006374	0.0198309	0.0241848	0.560093	-0.00100221	0.00158537	0.99756	-0.0069411	0.0875362
SL007640	0.0248382	0.0303983	0.561175	-0.000428864	0.00198051	0.99756	NA	NA
SL008703	0.0134918	0.0165125	0.561175	0.0005545	0.00107626	0.99756	NA	NA
SL000584	0.0276459	0.0338716	0.561261	-1.21722e-05	0.00220601	0.999692	-0.0133885	0.000714963
SL001890	0.0193973	0.0238316	0.562434	-0.000961953	0.00155374	0.99756	0.0039807	0.355272
SL014029	0.014935	0.0184017	0.563292	-0.000834572	0.00120066	0.99756	-0.0114256	0.000453373
SL004649	0.0209386	0.0258083	0.563292	0.00207899	0.00167803	0.827072	0.000491092	0.909066
SL005679	-0.0409011	0.0505508	0.564413	0.000721199	0.00329432	0.99756	0.00818845	0.283256
SL010501	0.0188029	0.0232703	0.564674	0.0034119	0.00151538	0.257801	NA	NA
SL000347	0.0183933	0.0228658	0.566894	9.4454e-05	0.00149055	0.99756	0.010036	0.00643244
SL003687	-0.0199311	0.0248538	0.568225	0.00123152	0.0016173	0.99756	-0.0175189	0.000110088
SL007242	-0.0240586	0.0301782	0.571307	0.000818935	0.00197008	0.99756	0.0219727	2.66e-10
SL011629	-0.0238194	0.0299247	0.571681	-0.00328554	0.0019509	0.53471	NA	NA
SL005195	0.0204674	0.0258398	0.574128	0.00228848	0.00168458	0.773557	NA	NA
SL006918	-0.0409267	0.0519961	0.577426	0.00215603	0.0033879	0.99756	0.0359198	3.99e-06
SL005266	-0.0344873	0.0439562	0.578812	0.00237198	0.00286364	0.99756	0.0319333	9.28e-08
SL000474	0.00971811	0.0124172	0.57975	0.000629303	0.000813023	0.99756	0.00169249	0.651145
SL000615	0.0248884	0.0320847	0.584589	-0.000568772	0.00209048	0.99756	NA	NA
SL004301	-0.0157664	0.0205017	0.589262	-0.00115673	0.00133617	0.99756	NA	NA
SL005199	0.0328138	0.0431138	0.594398	0.00186517	0.00280797	0.99756	NA	NA
SL004636	0.0375187	0.0493007	0.594398	-0.000799301	0.00321284	0.99756	-0.0202458	1.7e-06
SL003177	-0.0111411	0.0146821	0.595537	0.00107304	0.000957014	0.910459	0.00212853	0.452105
SL007229	-0.024458	0.0322944	0.595735	0.00183292	0.00210409	0.99756	0.00202798	0.766316
SL004939	0.0170592	0.022534	0.595735	-0.000312543	0.00147249	0.99756	-0.016318	0.00451533
SL004643	0.0251918	0.0333979	0.596848	1.01808e-05	0.00217876	0.999692	-0.00108286	0.808788
SL004876	0.00813958	0.0107936	0.596848	0.00162564	0.000707484	0.236899	0.0116543	4.62e-10
SL008504	-0.0122641	0.016358	0.599725	-0.000413885	0.0010681	0.99756	0.00179888	0.727475
SL000145	-0.00939219	0.0125795	0.601239	0.00245587	0.000817218	0.0655636	0.0218304	6.29e-16
SL000139	0.0247669	0.0331865	0.601239	-4.84958e-05	0.00216425	0.999692	-0.038537	2.06e-11
SL014208	0.0245661	0.0330575	0.60315	0.00101918	0.00215713	0.99756	NA	NA
SL004853	-0.0292274	0.0395837	0.606341	0.00121567	0.00257939	0.99756	-0.000650174	0.91154
SL001731	0.0261186	0.0356308	0.609516	0.00145767	0.00231992	0.99756	-0.0188362	0.00523649
SL007888	0.020331	0.0277417	0.609516	0.00135601	0.00180409	0.99756	NA	NA
SL017529	0.0173744	0.0237655	0.610335	-0.000130843	0.00154901	0.99756	NA	NA
SL010503	-0.0384302	0.0528274	0.612613	0.000231623	0.00344276	0.99756	-0.012576	0.0960599
SL004737	0.0181732	0.0250377	0.613309	-0.000132502	0.00163119	0.99756	-0.0101701	0.0473326
SL001718	0.0197606	0.0273207	0.614161	0.000841896	0.00178048	0.99756	-0.0159255	8.63e-07
SL002646	0.0253155	0.0350031	0.614161	-0.00100004	0.00227736	0.99756	-0.00228757	0.780654
SL010393	0.0274527	0.0380828	0.615442	-8.0504e-06	0.00248187	0.999692	-0.0133899	0.000887665
SL010379	-0.0155011	0.0215606	0.615888	-0.000668617	0.00140717	0.99756	0.00646238	0.11999
SL006528	0.0104281	0.0145342	0.615888	0.00313217	0.000945749	0.0312423	0.011482	2.3e-05
SL004063	0.0172549	0.0240617	0.615888	0.00199005	0.00156648	0.795576	-0.0125171	5.17e-05
SL004486	0.0214387	0.029899	0.615888	-0.0002017	0.00194851	0.99756	-0.00276742	0.431192
SL005357	-0.0184431	0.0257415	0.615888	0.000861061	0.00167861	0.99756	NA	NA
SL000441	-0.0157543	0.0221085	0.618387	-0.00173351	0.00145054	0.849108	0.0106948	0.0290541
SL006197	0.0207492	0.0292298	0.619958	-0.000538582	0.00190439	0.99756	-0.00627296	0.0134427
SL004851	-0.0176465	0.0249555	0.621549	-0.000387958	0.0016229	0.99756	NA	NA
SL003200	0.00871682	0.0124083	0.624653	0.000582976	0.000808779	0.99756	0.0103131	0.000110658
SL016549	0.0326507	0.0467024	0.626754	-0.000358031	0.00304358	0.99756	-0.0133065	0.0326582
SL004151	0.0127888	0.0184029	0.629043	0.00182862	0.00119915	0.658733	-0.000608233	0.881078
SL010529	0.0225037	0.0323912	0.629043	2.27715e-05	0.00211094	0.999692	-0.018947	0.000819985
SL005227	0.0235999	0.0340809	0.630266	-0.00265248	0.00221457	0.847688	-0.00784905	0.119253
SL010523	0.0288269	0.041697	0.630551	-0.000945765	0.0027193	0.99756	NA	NA
SL013488	-0.030091	0.0435989	0.630868	0.00163414	0.00284087	0.99756	NA	NA
SL017128	0.0105698	0.0154671	0.635758	-0.000442975	0.00101091	0.99756	-0.0131869	0.000273914
SL004815	-0.0370721	0.0543126	0.63578	0.000632231	0.00353951	0.99756	NA	NA
SL004356	0.0192079	0.0282047	0.635965	0.000385802	0.00183436	0.99756	NA	NA
SL007752	-0.0190111	0.0279497	0.635965	-0.00164697	0.00182518	0.99756	0.0100992	0.211628
SL010373	0.0172192	0.0253214	0.635965	-0.00109324	0.00164542	0.99756	0.00121117	0.776404
SL012561	-0.015864	0.0234085	0.637219	0.000948755	0.00152779	0.99756	0.00768152	0.0523262
SL017424	-0.0170506	0.0252025	0.637533	0.00108323	0.00164573	0.99756	0.00245595	0.577333
SL007281	0.0227104	0.0338663	0.641472	0.000326447	0.00220568	0.99756	NA	NA
SL000678	0.0154834	0.0231244	0.641472	0.000132041	0.00150972	0.99756	-0.0183014	7.56e-06
SL005372	-0.036308	0.0543033	0.641472	0.00213471	0.00353831	0.99756	-0.0142058	0.0442817
SL000002	0.00864694	0.012933	0.641472	0.000252459	0.000843865	0.99756	0.00444873	0.0533013
SL005187	-0.026624	0.039905	0.641993	0.00094483	0.00259803	0.99756	NA	NA
SL013988	0.0208714	0.031364	0.642766	-0.000544548	0.00204754	0.99756	NA	NA
SL006920	-0.0273973	0.041513	0.646599	0.00157536	0.00270495	0.99756	0.00382916	0.515225
SL003307	-0.0310014	0.0471282	0.647727	0.000958012	0.00307121	0.99756	0.0301794	6.72e-10
SL000591	-0.00957844	0.0146506	0.650373	0.00073955	0.000960027	0.99756	NA	NA
SL011405	-0.036503	0.055917	0.650541	0.000762439	0.00364404	0.99756	NA	NA
SL004145	0.0101815	0.0156563	0.651942	-1.76872e-05	0.00101907	0.999692	0.00117693	0.791905
SL004689	-0.0121195	0.0186831	0.652467	-0.00317713	0.00121534	0.135777	NA	NA
SL008967	0.0366532	0.0565606	0.652467	-0.00067692	0.003686	0.99756	-0.0178101	0.101928
SL004515	0.0252619	0.0390239	0.652467	0.00189374	0.00254835	0.99756	-0.0409096	2.14e-07
SL014488	-0.0321229	0.050385	0.659467	-0.000302914	0.00328358	0.99756	NA	NA
SL005212	-0.0145017	0.0227576	0.659467	-0.000218204	0.00148295	0.99756	-0.00354008	0.348624
SL012754	-0.0138159	0.0217188	0.659727	-0.0012221	0.0014171	0.99756	-0.0203886	8.38e-06
SL004751	0.019588	0.0309953	0.6625	-0.000265733	0.00201641	0.99756	0.00386826	0.409538
SL004872	0.0272024	0.0431003	0.662536	9.37835e-05	0.00280886	0.998775	-0.0132044	0.00154329
SL007673	-0.0102588	0.0162771	0.66262	0.00255654	0.00106244	0.202061	0.00115617	0.749637
SL000009	0.0142472	0.0227388	0.665017	0.00158997	0.00148307	0.929714	-0.0107078	0.0265875
SL011549	0.0228338	0.0366869	0.667326	-0.00172029	0.00239027	0.99756	0.00787826	0.0508539
SL000588	0.0122136	0.0196548	0.667326	-0.000242847	0.00128267	0.99756	-0.0128221	0.00125239
SL005230	0.00867088	0.0139537	0.667326	0.00107272	0.000910358	0.861105	0.00708235	0.0195936
SL001947	-0.00967818	0.0156177	0.668093	-0.000795961	0.00101834	0.99756	0.0110751	0.000204915
SL004795	-0.0280333	0.0453763	0.669007	0.0008624	0.00295705	0.99756	-0.00646174	0.251458
SL005158	-0.0053916	0.00882153	0.673802	0.000732604	0.000574427	0.795576	-0.00874125	0.000952017
SL003918	0.00871466	0.0143632	0.676828	-0.000410188	0.00093899	0.99756	NA	NA
SL008331	-0.0312407	0.0517274	0.678478	0.00172553	0.00337064	0.99756	NA	NA
SL016550	-0.0330741	0.0549636	0.679649	0.00142441	0.0035817	0.99756	0.0272392	0.000112501
SL001902	0.00832147	0.0139445	0.682638	-0.00221434	0.00090698	0.192596	0.00342209	0.351449
SL006189	-0.0240496	0.0403139	0.682638	0.000706592	0.00262576	0.99756	0.0247205	7.47e-08
SL005214	0.0060173	0.0101043	0.682851	-0.000130966	0.000660659	0.99756	NA	NA
SL003710	0.0203049	0.0342091	0.683827	-0.000197391	0.00222526	0.99756	-0.0103393	0.0229686
SL004364	-0.0101312	0.017117	0.684486	-0.000607225	0.0011175	0.99756	0.00313405	0.393149
SL010927	-0.0325186	0.0550062	0.684486	-0.000553711	0.00358269	0.99756	NA	NA
SL005491	-0.00929552	0.0159493	0.690761	-0.00224037	0.00103898	0.286791	NA	NA
SL010516	-0.0390476	0.0672972	0.692257	-0.00188697	0.00438536	0.99756	NA	NA
SL008466	0.0177037	0.0306826	0.693773	-0.00246841	0.00200616	0.828768	-0.0328959	7.73e-13
SL018947	0.0146867	0.0254741	0.693773	0.000365591	0.00166657	0.99756	-0.0109292	0.0115879
SL000485	0.0169375	0.0294037	0.693773	-0.00122151	0.00191335	0.99756	-0.00387651	0.309184
SL001802	0.00982783	0.0172093	0.697234	-0.000409978	0.00112216	0.99756	NA	NA
SL007306	-0.00931234	0.0165513	0.703607	0.00250435	0.00107662	0.231768	0.0112568	0.0019771
SL007100	0.0147557	0.0262875	0.70367	-0.00315211	0.00170899	0.462559	-0.00731331	0.14735
SL010514	-0.0146628	0.0261381	0.70367	-0.00136479	0.0017115	0.99756	0.0182073	0.000101411
SL000539	0.0213335	0.0382238	0.705386	0.00112296	0.00249079	0.99756	0.0189993	0.0110614
SL000408	-0.0140323	0.025305	0.707725	-0.00355924	0.00164885	0.286791	-0.0202651	0.000118073
SL000638	0.0142217	0.0257703	0.709208	0.000958407	0.00167728	0.99756	-0.00837197	0.0645644
SL005221	0.0119434	0.0216697	0.709208	-0.000327105	0.00141471	0.99756	NA	NA
SL003305	0.0158039	0.0287192	0.70927	0.000421059	0.00187309	0.99756	-0.00168037	0.842236
SL004306	-0.0228699	0.0419223	0.711896	0.000494753	0.00273204	0.99756	0.0206754	0.0119751
SL008956	0.0126367	0.023212	0.711896	-0.00135242	0.00151793	0.99756	0.00748619	0.23105
SL014470	-0.00890121	0.0163544	0.711896	-0.000466351	0.00106857	0.99756	NA	NA
SL008931	0.024874	0.0457274	0.711896	-0.000122944	0.00298006	0.99756	-0.0565959	1.7e-10
SL007003	-0.0210382	0.0389245	0.714134	0.000241591	0.00253517	0.99756	0.0130351	0.000614664
SL000524	-0.00996296	0.0185524	0.71637	0.00277441	0.00120805	0.236899	NA	NA
SL008837	0.011339	0.0211508	0.716469	0.000553791	0.00138214	0.99756	-0.0219933	5.54e-07
SL014469	-0.0192862	0.0363279	0.720158	0.00145159	0.00236705	0.99756	0.0200124	0.00213145
SL014248	-0.00797574	0.0150738	0.72098	-0.00171955	0.000981323	0.500615	NA	NA
SL003761	0.0148073	0.0281527	0.72295	0.00223595	0.00183464	0.832197	-0.000736287	0.888677
SL005166	-0.0115458	0.0222585	0.728361	0.000212867	0.00145151	0.99756	0.00746732	0.11872
SL000510	-0.00496443	0.00961109	0.729522	0.000135482	0.000629081	0.99756	0.00313143	0.375925
SL006088	-0.0312187	0.0606642	0.730458	0.00146166	0.00395323	0.99756	NA	NA
SL005629	-0.0131141	0.0255954	0.731679	-0.00137452	0.00166997	0.99756	0.0112977	0.0236259
SL000020	0.0127343	0.0249468	0.732601	0.00339808	0.00161968	0.311537	0.0294615	4.94e-08
SL007358	-0.0201508	0.0396335	0.733632	0.000477041	0.00258287	0.99756	NA	NA
SL017290	-0.00881665	0.0174488	0.735589	0.00143106	0.0011364	0.803847	0.0260583	4.21e-13
SL008099	-0.0110141	0.021832	0.735589	0.000439773	0.00142567	0.99756	NA	NA
SL005205	0.00899163	0.0178591	0.735767	0.000301457	0.00116485	0.99756	-0.00393493	0.240802
SL003930	0.0108434	0.0217178	0.738617	0.000423796	0.00141225	0.99756	0.000463185	0.921667
SL005575	-0.0127955	0.0258033	0.740801	0.00064881	0.00167913	0.99756	-0.00698939	0.11711
SL004760	-0.0187101	0.0378649	0.7416	0.000111604	0.00246766	0.99756	0.0357037	1.32e-13
SL007310	0.0237719	0.048345	0.742953	-0.000205754	0.00315065	0.99756	NA	NA
SL010491	0.0138477	0.0282974	0.744253	-0.000678465	0.00184402	0.99756	-0.00343333	0.366172
SL010493	-0.0147347	0.0304469	0.748141	-0.000688833	0.0019861	0.99756	NA	NA
SL011631	0.0265107	0.0548928	0.748294	-0.000106372	0.00357738	0.999692	NA	NA
SL014009	-0.00992777	0.0209361	0.755015	0.00181229	0.00136373	0.783076	0.016815	2.66e-08
SL004864	-0.0152283	0.0323462	0.757209	-0.000393709	0.00210399	0.99756	NA	NA
SL001791	0.0148296	0.0319451	0.762091	0.00099987	0.0021002	0.99756	0.0190476	0.0131997
SL008808	0.016089	0.0347545	0.762488	0.000373961	0.00226492	0.99756	0.00626342	0.0203623
SL005688	-0.0174426	0.0380418	0.764991	0.00170083	0.0024786	0.99756	-0.0168202	0.0094107
SL017614	-0.0217505	0.047454	0.764991	0.00292946	0.00309119	0.98441	-0.0205784	0.000334764
SL000455	0.00812063	0.017806	0.76624	0.000536285	0.00116079	0.99756	-0.00072732	0.882635
SL004580	0.00915794	0.0201258	0.766413	-0.000812025	0.00131326	0.99756	NA	NA
SL010530	0.00927006	0.0204502	0.767192	-0.000208777	0.0013344	0.99756	NA	NA
SL007033	0.00607955	0.0134813	0.76848	0.00040794	0.00088106	0.99756	0.0106023	0.000170814
SL000004	-0.0272275	0.0606144	0.769287	0.00528259	0.00394669	0.777833	NA	NA
SL004838	0.0158666	0.0357769	0.772231	0.000381923	0.00233675	0.99756	0.00728349	0.0901912
SL016969	-0.0131932	0.0297597	0.772231	0.00152719	0.00193794	0.99756	0.0550007	5.67e-34
SL000346	-0.0105258	0.0237462	0.772231	-0.00213457	0.00154476	0.755945	0.0204899	5.6e-05
SL000403	-0.00649442	0.0147221	0.773342	0.000930288	0.000963558	0.977675	0.000164358	0.962001
SL003657	0.0195758	0.0445296	0.773935	0.000555566	0.00290195	0.99756	NA	NA
SL011508	-0.0179677	0.04134	0.777467	0.00272535	0.0026911	0.95788	NA	NA
SL000581	-0.0115568	0.0267932	0.778668	0.00112226	0.0017452	0.99756	NA	NA
SL005675	-0.0125976	0.0292296	0.778668	0.000587714	0.00190992	0.99756	9.09e-05	0.987901
SL000019	-0.00555093	0.0128867	0.778668	0.00186316	0.00084201	0.269569	NA	NA
SL000448	0.0231879	0.0547027	0.783614	0.00145533	0.00356469	0.99756	NA	NA
SL004182	0.0107793	0.0254663	0.783614	-6.44861e-05	0.00165861	0.99756	-0.00291691	0.295668
SL012698	-0.0134684	0.0319312	0.784172	0.00207388	0.00208198	0.968749	NA	NA
SL003524	-0.0146333	0.0348842	0.785156	0.00101741	0.00227318	0.99756	NA	NA
SL010466	0.0140089	0.0334353	0.785156	0.000954451	0.00217763	0.99756	NA	NA
SL007429	0.0059717	0.0143515	0.786902	0.000213289	0.000936488	0.99756	NA	NA
SL011708	-0.0195735	0.0471389	0.78694	0.000664299	0.00307198	0.99756	0.00571306	0.252319
SL017611	-0.0237073	0.0576547	0.789106	0.000627437	0.00375731	0.99756	NA	NA
SL007373	-0.0285157	0.0694493	0.789106	-0.00183346	0.00452565	0.99756	NA	NA
SL002763	-0.0090172	0.0220282	0.789106	-0.00302424	0.00143288	0.308167	-0.0153776	8.59e-06
SL004143	-0.00568916	0.0139581	0.789106	0.00085462	0.00091297	0.988781	0.00212505	0.474368
SL004120	0.00897451	0.0220369	0.789106	-0.00111657	0.00143731	0.99756	NA	NA
SL000454	-0.0142631	0.0350394	0.789106	0.00105526	0.00228328	0.99756	0.00591297	0.174867
SL004723	0.010507	0.0258225	0.789106	-0.000383951	0.00168482	0.99756	-0.00233843	0.492045
SL013989	0.00968059	0.0239507	0.790152	0.000641789	0.0015684	0.99756	NA	NA
SL001973	0.00675376	0.0167223	0.790152	-0.000317762	0.00109145	0.99756	-0.0152215	4.17e-07
SL008063	-0.0230602	0.0572636	0.790152	0.00101711	0.00373174	0.99756	0.0173024	0.0859027
SL004650	0.00652501	0.0162171	0.790152	0.00190178	0.00105769	0.481069	NA	NA
SL000398	-0.0133126	0.0333388	0.792023	-0.000292162	0.00217188	0.99756	0.0182771	4.06e-06
SL008157	-0.0174632	0.0438667	0.792353	0.000817239	0.00285869	0.99756	0.0218695	1.98e-07
SL000554	0.012559	0.0318224	0.794561	-0.000174243	0.00207386	0.99756	NA	NA
SL004783	0.00931327	0.0237052	0.795367	0.00330897	0.00154683	0.296573	0.0272543	0.0134216
SL000038	-0.0111333	0.028505	0.795587	0.00087665	0.00185789	0.99756	NA	NA
SL011530	0.0209203	0.0536778	0.795587	-0.00240806	0.00349736	0.99756	NA	NA
SL000616	-0.00694024	0.017855	0.795587	-0.00199039	0.00116534	0.524878	-0.0106027	0.0960792
SL017612	-0.0172857	0.0445285	0.795587	0.000998784	0.00290176	0.99756	NA	NA
SL016553	0.00880417	0.0226989	0.795587	0.000323565	0.00147992	0.99756	-0.00377301	0.312056
SL005793	-0.0245748	0.0633937	0.795587	0.00284463	0.00413039	0.99756	NA	NA
SL003733	-0.00688193	0.0178742	0.796823	0.00122457	0.00116764	0.934646	0.0182588	6.38e-06
SL003755	-0.00839847	0.0218406	0.796823	0.000918913	0.00143467	0.99756	NA	NA
SL005156	0.00985758	0.0257306	0.797329	-0.0031813	0.00167402	0.426323	-0.00870548	0.0157164
SL003643	-0.0114636	0.0304248	0.801272	0.000408	0.00198275	0.99756	0.0194231	0.00301302
SL000305	0.0121325	0.0322467	0.801272	0.00326309	0.00209906	0.636614	0.00219242	0.752517
SL000006	0.016986	0.0451826	0.801272	0.00640683	0.00293674	0.278933	-0.00435439	0.615126
SL004070	0.00865066	0.0233668	0.804977	0.00187796	0.00151738	0.827072	0.0322856	5.59e-11
SL000467	-0.0049859	0.0134796	0.804977	0.00012013	0.00088205	0.99756	NA	NA
SL009412	0.00512742	0.0140002	0.807348	-0.000919357	0.000913353	0.962389	NA	NA
SL008759	-0.0153457	0.0421382	0.808387	0.000781505	0.00274604	0.99756	NA	NA
SL016567	0.00772579	0.0212923	0.808807	1.24338e-05	0.00138897	0.999692	0.000260942	0.947302
SL013489	0.00737794	0.0205006	0.810596	-0.00130708	0.00133436	0.972922	-0.00141735	0.732732
SL004669	-0.00641324	0.0179252	0.811026	0.00385192	0.00116716	0.0312799	NA	NA
SL004154	-0.00524457	0.0146614	0.811026	-0.00133907	0.000954554	0.741173	0.00593081	0.0877397
SL003685	0.00908997	0.0254952	0.811218	-1.23147e-05	0.0016633	0.999692	0.0139705	0.10866
SL008916	-0.00672867	0.0189104	0.811218	-1.8469e-05	0.00123558	0.999692	NA	NA
SL006912	0.0112624	0.0318075	0.81198	-0.00159792	0.00206358	0.99756	-0.00218386	0.773447
SL004305	-0.00704806	0.0200848	0.813941	-0.0025512	0.00131591	0.406631	0.00863177	0.0282242
SL006523	-0.00720985	0.0207234	0.815766	-0.00142335	0.00134818	0.933369	0.00846944	0.145984
SL006805	0.00727427	0.0211455	0.818344	-0.000512419	0.00137795	0.99756	-0.00407524	0.222332
SL014071	0.00968288	0.0284101	0.820321	-0.000292129	0.00185035	0.99756	0.00445355	0.240717
SL003674	0.0123846	0.0367033	0.822384	-0.000575632	0.00239189	0.99756	-0.0187986	6.77e-05
SL004899	-0.00769425	0.0229233	0.822384	0.00135601	0.00149647	0.99756	NA	NA
SL004329	-0.00941301	0.0280513	0.822384	-0.00262418	0.00182949	0.732521	0.0262999	2.71e-09
SL003322	0.00586296	0.0175178	0.822384	-0.00249142	0.00113948	0.278933	NA	NA
SL011528	0.0107599	0.0321976	0.822384	-0.00173119	0.00209821	0.99756	0.0232762	0.00531555
SL018629	0.00699253	0.0209865	0.822513	-0.00010008	0.00136394	0.99756	-0.00672936	0.176028
SL003862	0.014263	0.0430192	0.823188	-0.000544171	0.00280215	0.99756	0.0062576	0.232331
SL004811	-0.0124139	0.0375663	0.823404	0.000516392	0.00244815	0.99756	NA	NA
SL016551	-0.0148924	0.0461958	0.829483	-0.000880319	0.00300919	0.99756	-0.000930869	0.91762
SL017528	0.0088074	0.0274598	0.830152	-0.00164204	0.00178279	0.99756	-0.00584819	0.364948
SL005685	0.0127747	0.0401309	0.830835	-0.000146467	0.00261533	0.99756	0.0194389	4.17e-05
SL006998	0.0146802	0.0461294	0.830835	1.80057e-05	0.00300626	0.999692	NA	NA
SL004759	-0.0117723	0.0372067	0.831671	0.00120462	0.00242324	0.99756	0.0627896	1.79e-26
SL011616	0.00853577	0.0279542	0.840251	-0.00184893	0.00181766	0.953569	0.00673784	0.246419
SL010513	-0.0180078	0.0596445	0.842422	0.00119232	0.00388686	0.99756	-0.0178356	0.100996
SL005155	-0.017057	0.0573674	0.844869	0.00146603	0.00373835	0.99756	0.00100553	0.942023
SL004348	0.00903535	0.0303903	0.844869	-0.000394568	0.00197911	0.99756	0.0110456	0.00045995
SL004823	-0.00986412	0.0335384	0.846842	0.000570755	0.00218483	0.99756	NA	NA
SL002621	-0.00940311	0.0321798	0.847731	-0.00157348	0.00209673	0.99756	-0.00814805	0.0779206
SL004921	-0.0159597	0.0551657	0.849454	0.00120693	0.00359495	0.99756	0.00784728	0.323018
SL000527	-0.00940266	0.0327759	0.850777	-0.00110741	0.00213574	0.99756	-0.0127241	0.0389213
SL010528	0.0131917	0.0464493	0.851641	0.000535899	0.00302706	0.99756	-0.0100587	0.0467853
SL011628	-0.00702489	0.0247612	0.851641	-0.000462822	0.00161311	0.99756	-0.0120684	0.00479873
SL000440	0.0111508	0.0393623	0.851641	0.00405481	0.00256201	0.624789	NA	NA
SL003190	0.0053305	0.0189339	0.852397	0.00104159	0.00123482	0.99756	NA	NA
SL004362	0.00584946	0.0209586	0.853725	0.00214013	0.0013654	0.628228	0.0283435	1.65e-16
SL003304	-0.00276796	0.0100753	0.855593	0.000343031	0.000658366	0.99756	0.0296848	1.83e-24
SL005219	-0.0360196	0.131255	0.855593	0.000878742	0.00855389	0.99756	0.00619523	0.7889
SL005084	0.00407017	0.0148383	0.855593	-0.000651159	0.000968152	0.99756	0.0308651	5.29e-16
SL003179	-0.00662828	0.0243365	0.856503	0.00175937	0.00158724	0.913579	0.035229	1.3e-13
SL005572	0.00334605	0.012518	0.859497	0.00225843	0.000814193	0.102208	NA	NA
SL010522	0.00731329	0.0273831	0.859497	-0.00106801	0.00178991	0.99756	-0.00958654	0.0134615
SL005730	0.00586893	0.0223786	0.862427	-0.000621065	0.00146329	0.99756	-0.0159082	1.1e-05
SL014048	-0.0116418	0.044592	0.862427	-0.00109693	0.00290586	0.99756	NA	NA
SL004938	-0.00947292	0.0362969	0.862427	0.00154361	0.00236497	0.99756	NA	NA
SL003461	-0.00711828	0.0273635	0.862427	0.000773838	0.00178415	0.99756	-0.00415667	0.217374
SL001726	0.00709611	0.0274648	0.862473	0.00129502	0.0017833	0.99756	0.0198371	0.000370809
SL007327	0.00663647	0.0256865	0.862473	-0.00399322	0.00167876	0.20965	NA	NA
SL006913	-0.0109322	0.0431359	0.865873	0.00183758	0.00281057	0.99756	NA	NA
SL006460	0.00396711	0.015872	0.868072	0.00185488	0.00103419	0.483345	0.000669833	0.837192
SL005200	0.00666914	0.0270547	0.870225	-0.000949972	0.00176476	0.99756	-0.00623166	0.353117
SL004915	-0.0138381	0.0574594	0.874245	-0.00114843	0.00374447	0.99756	NA	NA
SL000479	0.00505682	0.0214581	0.877846	0.000142164	0.00139999	0.99756	-0.0012905	0.763576
SL004862	0.00366327	0.0162206	0.88534	-0.000771966	0.00105762	0.99756	0.00949782	0.00191595
SL007153	0.00544467	0.0243787	0.886704	-0.00392438	0.00158782	0.180815	-0.000185743	0.974863
SL011400	0.00748339	0.0342817	0.890198	-0.000559863	0.00223221	0.99756	NA	NA
SL000277	-0.00219628	0.0104562	0.896372	0.00199444	0.000681507	0.0773163	-0.00633555	0.00987896
SL012395	-0.00407819	0.0199134	0.898847	0.00289176	0.00129332	0.262052	0.0328789	6.94e-16
SL000087	-0.00781444	0.0382119	0.898847	0.000520935	0.00248712	0.99756	-0.00849528	0.0720013
SL010470	0.00538838	0.0263563	0.898847	-0.00076834	0.00171831	0.99756	0.0152795	0.00409978
SL008059	0.00566162	0.0293629	0.907759	0.00044927	0.00191022	0.99756	0.00167423	0.741177
SL008909	-0.00294306	0.0153256	0.907759	-0.000654301	0.0010037	0.99756	-0.00647673	0.0232676
SL007324	0.00575045	0.0301552	0.908136	0.00123632	0.00196444	0.99756	0.00232768	0.597433
SL000049	0.00247501	0.0132124	0.910213	0.00355543	0.000855257	0.00235096	NA	NA
SL004852	-0.00557334	0.0302913	0.910859	-0.000470709	0.00197171	0.99756	0.00369117	0.622509
SL003197	0.00591772	0.032202	0.910859	0.00543672	0.00208974	0.139222	0.0162477	0.00103605
SL005403	0.00289236	0.0157768	0.910859	-0.00216923	0.00103305	0.311537	-0.0140077	0.00161628
SL004271	-0.005038	0.0275326	0.910859	0.001404	0.00179543	0.99756	0.00444413	0.504844
SL000283	-0.00305516	0.0170356	0.912664	0.000960825	0.00111202	0.99756	NA	NA
SL005797	0.00399897	0.0223362	0.912664	-0.00285535	0.00145497	0.391773	-0.0453086	4.12e-19
SL006915	0.0030898	0.0174364	0.912799	0.0020531	0.00113445	0.473387	-0.00148252	0.776404
SL008631	-0.00243086	0.0137722	0.912799	0.000119352	0.000898303	0.99756	0.0086174	0.00135584
SL006372	0.00644942	0.0366044	0.912799	-7.86672e-05	0.00238551	0.998775	-0.00111513	0.776552
SL002036	0.00617783	0.0354027	0.912812	5.19201e-06	0.00230207	0.999692	-0.001509	0.860407
SL003792	-0.00856377	0.0491065	0.912812	0.00207667	0.00319728	0.99756	-0.0307529	0.00173401
SL000519	0.00446984	0.0265506	0.917095	8.11428e-05	0.00173248	0.99756	0.00702813	0.131107
SL007828	0.0032177	0.0192877	0.917407	0.000190142	0.00125675	0.99756	-0.00379396	0.351449
SL011630	-0.00743154	0.0447188	0.917407	0.00108458	0.00291413	0.99756	0.0199063	1.49e-05
SL004068	0.00331423	0.0204012	0.919414	-0.00015977	0.00132871	0.99756	0.00549015	0.104848
SL007266	-0.00483174	0.0299559	0.919414	0.000362802	0.00195052	0.99756	0.00773587	0.00987579
SL010390	-0.00249234	0.015473	0.919414	0.00175745	0.00100709	0.503566	0.00880225	0.00193408
SL008728	0.00227048	0.0145184	0.920579	-0.00151556	0.000949956	0.614202	-0.0121037	4.2e-06
SL004668	-0.00310436	0.019873	0.920579	0.00451613	0.00129364	0.0186744	0.00572883	0.087491
SL004260	0.00334956	0.0214524	0.920579	-0.000838567	0.00139785	0.99756	-0.0171192	2.02e-06
SL006476	-0.00706819	0.0452851	0.920579	0.000646738	0.00295117	0.99756	-0.00547624	0.191593
SL013928	-0.00797404	0.0519802	0.921376	-0.00044334	0.00338753	0.99756	-0.00399462	0.428237
SL011769	-0.00406801	0.0266166	0.921376	-0.000212902	0.00173865	0.99756	-0.0188108	4.77e-09
SL000426	0.00442734	0.0290463	0.921376	0.00427869	0.00188738	0.251722	NA	NA
SL004477	-0.00431194	0.0295815	0.926137	-0.00185914	0.00192941	0.977675	0.0209201	0.0111075
SL002655	-0.00482898	0.0334858	0.926676	-0.00267996	0.00217951	0.828768	0.00623663	0.231033
SL011535	-0.0035957	0.0255683	0.928217	-0.000180951	0.00167078	0.99756	-0.00438254	0.374777
SL000449	-0.00571297	0.0406505	0.928217	-0.000773908	0.00264909	0.99756	0.00357209	0.397828
SL010464	-0.00127575	0.00940586	0.930376	0.00145688	0.000610903	0.20812	0.0182467	1.09e-10
SL010521	-0.00890076	0.0658956	0.930376	0.00281957	0.00429349	0.99756	NA	NA
SL009790	-0.00180419	0.0134084	0.930376	0.000953952	0.00087445	0.923699	NA	NA
SL003711	0.00778528	0.0579675	0.930376	-0.00135133	0.00377751	0.99756	-0.0383285	1.28e-07
SL000142	0.00306463	0.0245915	0.937603	-0.000610683	0.00160434	0.99756	NA	NA
SL020171	-0.00357547	0.0293095	0.93902	-8.00009e-05	0.00190832	0.99756	-0.00270175	0.69127
SL004363	-0.00277411	0.0230459	0.9396	0.00181203	0.00150213	0.837896	NA	NA
SL008614	-0.00216903	0.0184466	0.941144	6.89662e-05	0.00120276	0.99756	-0.00442726	0.153469
SL004671	0.00264567	0.0229153	0.941459	-0.000720456	0.00149005	0.99756	NA	NA
SL005229	-0.00378084	0.0327701	0.941459	0.000136061	0.0021348	0.99756	0.017369	0.000170835
SL002561	-0.00271433	0.0238177	0.941869	-0.000868997	0.00155285	0.99756	-0.0103985	0.019286
SL016130	0.00269428	0.023866	0.941998	-0.000295505	0.00156592	0.99756	NA	NA
SL007385	0.00414409	0.0374662	0.94312	-0.000472206	0.0024412	0.99756	-0.00832565	0.0498982
SL016928	0.00321868	0.0303367	0.946068	-0.00414964	0.00198341	0.312026	0.00623927	0.47173
SL001691	0.00296894	0.0284617	0.946778	-0.00139739	0.00185765	0.99756	0.0097818	0.00180954
SL003196	-0.00454782	0.044365	0.947322	-0.00215679	0.00289047	0.99756	-0.0115633	0.022142
SL004720	0.00167751	0.0165711	0.947322	-0.00197009	0.00108095	0.473387	NA	NA
SL013165	-0.00207855	0.0206007	0.947322	0.00137971	0.00134626	0.953569	0.0151276	0.00112717
SL007696	-0.0012589	0.0128314	0.948245	0.000464978	0.000839754	0.99756	0.0114679	5.35e-05
SL007108	-0.00221536	0.0226214	0.948245	0.000720563	0.00146819	0.99756	NA	NA
SL011588	-0.00297803	0.03087	0.948689	0.00219689	0.0020085	0.923699	0.0199059	0.000430616
SL015046	0.00135932	0.0145201	0.950267	-0.00105973	0.000946896	0.910459	NA	NA
SL018938	-0.004018	0.0438742	0.951177	0.00117797	0.00285905	0.99756	NA	NA
SL012517	-0.00198657	0.0231533	0.955135	-0.00143696	0.00151238	0.98441	-0.0115689	0.0011706
SL003301	0.0013162	0.0158041	0.956434	-0.00115037	0.00102993	0.910459	0.00035156	0.9383
SL004690	-0.00178818	0.0222987	0.958196	0.0010472	0.00145244	0.99756	0.00742093	0.0895298
SL013240	-0.00298966	0.0377838	0.95831	-0.000891636	0.00245898	0.99756	-0.017734	0.0044418
SL007311	0.00492492	0.0640797	0.959402	-0.000967224	0.00417598	0.99756	-0.0114889	0.335675
SL018887	0.00171632	0.0235423	0.961859	0.00412109	0.00153013	0.117001	0.0204998	0.000602271
SL010384	-0.00141283	0.0199804	0.962885	0.000499447	0.00130618	0.99756	-0.00211076	0.469762
SL005430	0.00099556	0.014671	0.964444	0.00216637	0.00096051	0.257291	0.000623814	0.84916
SL006512	-0.00151468	0.0246343	0.968857	0.00146571	0.0016123	0.99756	NA	NA
SL007059	-0.00102158	0.017535	0.9699	-0.00036619	0.00114351	0.99756	-0.0065197	0.00368744
SL014269	-0.00260746	0.046279	0.9699	-0.000764688	0.00301247	0.99756	0.00853381	0.0855247
SL003184	0.00225104	0.0399973	0.9699	0.00152244	0.00260427	0.99756	-0.0199683	0.00497406
SL010616	0.00236363	0.0425372	0.9699	0.001906	0.0027715	0.99756	0.0293734	2.99e-08
SL000007	0.00124115	0.0223549	0.9699	-0.000130153	0.00145518	0.99756	NA	NA
SL004768	-0.00117999	0.0240431	0.974347	0.000205923	0.00157378	0.99756	-0.0135039	0.00581059
SL003650	0.00339426	0.0719664	0.975134	-0.00523967	0.00468711	0.910459	NA	NA
SL005630	0.00124065	0.039719	0.987229	0.00117241	0.00258822	0.99756	0.0120621	0.000164851
SL004920	-0.00087187	0.0298294	0.987531	0.00124243	0.00194359	0.99756	-0.0108418	0.00117512
SL010973	0.000728633	0.0251623	0.987531	0.00103195	0.00163654	0.99756	0.00129146	0.729483
SL005226	0.000594421	0.0287154	0.993269	-0.000922592	0.00187451	0.99756	NA	NA
SL003170	-0.000534179	0.027332	0.993269	0.00150811	0.00178221	0.99756	0.0058087	0.211543
SL007228	0.000695154	0.0366509	0.993269	-0.000322635	0.00238714	0.99756	0.0377574	2.24e-12
SL004865	-0.000285624	0.0161928	0.993567	5.56702e-05	0.00105651	0.99756	NA	NA
SL006091	-0.000512286	0.0313266	0.993831	-0.000267426	0.00203995	0.99756	NA	NA
SL006919	0.000491152	0.0342606	0.994681	-0.00024772	0.00223276	0.99756	NA	NA
SL000104	0.000382915	0.0322083	0.995875	-0.000174989	0.00209928	0.99756	0.00955805	0.0046168
SL000276	-0.000271209	0.0302795	0.997455	0.00778697	0.00196689	0.00403539	NA	NA
SL009868	-0.000199826	0.025364	0.997549	-0.000405641	0.00166938	0.99756	0.00496157	0.32833
SL011232	-0.000161202	0.0371468	0.99927	0.000917897	0.00242069	0.99756	NA	NA
SL006921	0.000107286	0.0339785	0.99927	0.00121964	0.00221141	0.99756	-0.0200038	0.00135845
SL011211	-0.00017277	0.0608263	0.99927	0.000115189	0.00396406	0.999692	NA	NA
SL010492	4.26979e-05	0.0269154	0.999503	-0.0003996	0.00175582	0.99756	-0.0147437	0.0793509
SL004340	1.26066e-06	0.0393425	0.999974	-0.00141519	0.00256316	0.99756	0.000880385	0.868397
*These results are from Lehallier B et al (2019) Nature Medicine
