# Supplementary material for: Plasma proteomic biomarker signature of age predicts health and life span
Source: eLife. 2020 Nov 19;9:e61073. doi: 10.7554/eLife.61073 (PMC7723412; doi:10.7554/eLife.61073)
Supplement: Figure 4—source data 1. [file elife-61073-fig4-data1.xlsx]

## Sheet: Sheet1
			Unadjusted model						Adjusted age, sex, site						Schoenfeld residuals v time (globalp)
SomaId	EntrezGeneSymbol	UniProt	beta	SE	B-H FDR	cindex	Lower.CI	Upper.CI	beta	SE	B-H FDR	cindex	Lower.CI	Upper.CI
SL000001	MUC1	P15941	0.159572	0.130371	0.240943	0.527029	0.525363	0.528695	0.0995188	0.145939	0.609385	0.789661	0.788476	0.790847	0.479142
SL000002	VEGFA	P15692	1.82602	0.190273	5.96259e-21	0.629729	0.628135	0.631323	1.07163	0.217617	1.72177e-05	0.794713	0.793549	0.795877	0.0403613
SL000003	ANG	P03950	0.860031	0.165226	4.79736e-07	0.56537	0.563729	0.567012	0.426371	0.17681	0.0493105	0.791363	0.790186	0.792541	0.418357
SL000011	AFP	P02771	0.341141	0.122879	0.00832057	0.548768	0.547143	0.550392	0.326587	0.140955	0.0596937	0.790864	0.789694	0.792033	0.453668
SL000017	VWF	P04275	0.320357	0.0748856	3.94834e-05	0.55784	0.556204	0.559476	0.108353	0.0785117	0.272026	0.790333	0.789167	0.791499	0.518497
SL000019	APOA1	P02647	-1.68028	0.205021	1.19299e-15	0.604278	0.602623	0.605932	-1.14183	0.224082	8.70399e-06	0.794815	0.793658	0.795973	0.613322
SL000022	FGA FGB FGG	P02671 P02675 P02679	0.36703	0.115665	0.00244763	0.562835	0.561181	0.564488	0.282324	0.126244	0.0683659	0.79081	0.789637	0.791984	0.548537
SL000024	F3	P13726	1.12183	0.140139	5.43197e-15	0.614526	0.612913	0.616139	0.193604	0.175607	0.390541	0.791297	0.790117	0.792477	0.545212
SL000038	CCL2	P13500	0.242209	0.094963	0.0151549	0.532139	0.530442	0.533837	0.101464	0.101534	0.440913	0.791839	0.790674	0.793004	0.630589
SL000039	CXCL8	P10145	0.771206	0.11261	2.61222e-11	0.585738	0.584094	0.587381	0.479458	0.112432	0.00025584	0.794453	0.793304	0.795603	0.461237
SL000045	IGFBP3	P17936	-0.48758	0.134088	0.000505826	0.551649	0.549991	0.553307	-0.0121916	0.145241	0.952117	0.789001	0.787824	0.790178	0.272118
SL000048	PROC	P04070	-1.3015	0.205281	7.36531e-10	0.581489	0.579779	0.583198	-0.640778	0.218213	0.0155385	0.791686	0.790523	0.792849	0.576188
SL000051	CRP	P02741	0.492047	0.0766962	4.59063e-10	0.593077	0.591438	0.594716	0.22623	0.0816489	0.0223357	0.792542	0.791378	0.793706	0.227227
SL000052	TNNT2	P45379	1.35203	0.104797	7.98221e-37	0.67186	0.670357	0.673363	0.714982	0.120956	1.7018e-07	0.798177	0.797017	0.799336	0.242729
SL000053	PLAT	P00750	0.314774	0.0784307	0.000119146	0.565415	0.563784	0.567047	0.0483489	0.0911895	0.694057	0.790938	0.789768	0.792107	0.65507
SL000055	CDH1	P12830	0.234539	0.229997	0.330162	0.511494	0.509787	0.513201	0.0235645	0.235365	0.941954	0.790226	0.789055	0.791397	0.620281
SL000062	KLK3	P07288	0.154114	0.0434381	0.000696396	0.541287	0.539661	0.542913	0.0377038	0.0784938	0.718358	0.790311	0.789146	0.791477	0.331691
SL000064	KLK7	P49862	-0.529049	0.155789	0.00116561	0.550286	0.548641	0.551931	-0.0772487	0.157282	0.715667	0.790239	0.78907	0.791409	0.563382
SL000070	GPC3	P51654	-0.810653	0.153222	3.07438e-07	0.567743	0.566106	0.569381	-0.357691	0.158239	0.0660319	0.792817	0.791649	0.793986	0.654394
SL000087	IL6	P05231	0.202229	0.0635118	0.00236309	0.555078	0.553472	0.556683	0.287266	0.073967	0.000943299	0.793708	0.792554	0.794863	0.318793
SL000089	TGFB3	P10600	0.426837	0.150837	0.0071346	0.545716	0.544082	0.547349	0.537435	0.171585	0.00903668	0.790908	0.789747	0.792069	0.247184
SL000124	MMP2	P08253	0.409154	0.216016	0.0695929	0.521873	0.520231	0.523516	-0.177232	0.218808	0.543082	0.790221	0.789051	0.791392	0.11541
SL000145	IL1R2	P27930	-0.598968	0.232049	0.0139637	0.543127	0.541447	0.544807	0.0548427	0.227963	0.858687	0.789729	0.788559	0.790898	0.0806261
SL000164	MB	P02144	0.421077	0.150646	0.00790922	0.532563	0.530856	0.53427	-0.394613	0.162077	0.0474921	0.792713	0.791559	0.793867	0.610849
SL000247	PGD	P52209	-0.429838	0.0475704	9.81149e-19	0.629609	0.627998	0.631219	-0.0461843	0.0553377	0.539358	0.790517	0.789351	0.791682	0.632335
SL000248	SERPINA3	P01011	1.21428	0.344413	0.000753577	0.548028	0.5464	0.549656	0.771793	0.360965	0.082985	0.790122	0.78895	0.791294	0.431901
SL000249	SERPINA1	P01009	0.475753	0.121381	0.000172435	0.567268	0.565676	0.56886	0.267494	0.127941	0.0908143	0.79251	0.791344	0.793676	0.505464
SL000250	SERPINF2	P08697	-2.36	0.235888	1.18206e-22	0.633912	0.632341	0.635483	-0.542576	0.289221	0.131188	0.790129	0.788954	0.791304	0.567441
SL000251	AHSG	P02765	-2.09051	0.278117	2.29263e-13	0.594617	0.592921	0.596314	-0.594418	0.306556	0.118258	0.790373	0.789191	0.791554	0.0568303
SL000254	ALB	P02768	-0.0817736	0.248209	0.755743	0.5105	0.508799	0.512201	-0.791506	0.277193	0.0185292	0.791365	0.790199	0.792532	0.159607
SL000268	PLG	P00747	-1.06605	0.209993	9.36803e-07	0.574414	0.572746	0.576082	-0.386113	0.198365	0.117037	0.791206	0.790035	0.792378	0.719152
SL000272	SERPINC1	P01008	-1.89101	0.325435	1.75323e-08	0.577253	0.575613	0.578892	-0.543686	0.327712	0.190506	0.790039	0.788866	0.791211	0.654159
SL000280	GOT1	P17174	0.251621	0.124014	0.0526511	0.525363	0.523742	0.526983	0.102776	0.127933	0.546953	0.790351	0.789183	0.791519	0.634013
SL000283	B2M	P61769	2.23063	0.124641	2.72322e-69	0.715706	0.714297	0.717116	1.00004	0.166035	1.23771e-07	0.797272	0.796115	0.79843	0.0207885
SL000306	NPPB	P16860	0.273217	0.0897833	0.00370928	0.553178	0.551558	0.554797	0.336715	0.0978173	0.00357633	0.792134	0.790978	0.79329	0.0675041
SL000308	SERPING1	P05155	0.643427	0.17614	0.000478117	0.54229	0.540675	0.543905	0.103148	0.183273	0.671566	0.789601	0.788431	0.790772	0.631325
SL000309	C1QA C1QB C1QC	P02745 P02746 P02747	0.25903	0.134818	0.0659325	0.516192	0.514507	0.517876	0.127323	0.125179	0.432733	0.789952	0.788768	0.791135	0.598018
SL000310	C1R	P00736	-0.114363	0.225996	0.631252	0.509835	0.508148	0.511522	-0.342886	0.225185	0.228006	0.790562	0.789394	0.791729	0.56989
SL000314	C3	P01024	-0.64821	0.113269	2.86678e-08	0.565845	0.564173	0.567517	-0.0335571	0.121882	0.841215	0.790103	0.788927	0.791278	0.484553
SL000316	C4A C4B	P0C0L4, P0C0L5	0.344041	0.138954	0.0183288	0.534657	0.532999	0.536316	0.0698145	0.145563	0.718358	0.789191	0.788016	0.790366	0.477039
SL000319	C5	P01031	0.563609	0.250985	0.032328	0.529696	0.528022	0.53137	-0.110486	0.267883	0.750324	0.788645	0.787467	0.789822	0.557477
SL000320	C5	P01031	0.534053	0.116659	1.0503e-05	0.561312	0.559688	0.562937	0.109803	0.129189	0.533981	0.790471	0.789303	0.791639	0.562758
SL000321	C5 C6	P01031,P13671	0.059298	0.235786	0.813938	0.508128	0.506477	0.509779	-0.206305	0.254047	0.54305	0.78981	0.78864	0.790981	0.597324
SL000323	C7	P10643	2.00636	0.178934	3.826e-28	0.648769	0.647244	0.650294	0.93553	0.202901	6.37019e-05	0.795171	0.79402	0.796322	0.552615
SL000325	C9	P02748	1.76057	0.191227	2.14606e-19	0.627585	0.626034	0.629136	0.799849	0.212343	0.00133766	0.794295	0.793134	0.795455	0.0654748
SL000338	CAST	P20810	0.228574	0.0951239	0.022014	0.525653	0.524011	0.527296	0.140683	0.10396	0.283566	0.790544	0.789373	0.791716	0.540525
SL000342	CAT	P04040	0.165839	0.100005	0.111664	0.518985	0.517326	0.520644	0.140009	0.106222	0.298408	0.790321	0.789149	0.791493	0.499808
SL000343	CTSB	P07858	1.33987	0.137506	1.46321e-21	0.636963	0.635368	0.638559	0.581894	0.153584	0.00126358	0.794424	0.793255	0.795592	0.388467
SL000344	CTSD	P07339	0.448466	0.103385	3.06148e-05	0.558256	0.556581	0.559931	0.0728333	0.116151	0.634989	0.790493	0.789315	0.791671	0.501743
SL000357	F9	P00740	0.792613	0.242796	0.00183029	0.546569	0.544903	0.548235	0.118967	0.245959	0.718358	0.789829	0.788656	0.791001	0.647119
SL000360	F10	P00742	-1.71087	0.193614	5.59011e-18	0.608499	0.60686	0.610139	-0.546031	0.226495	0.0493105	0.791822	0.790658	0.792985	0.281153
SL000377	CKB	P12277	0.197101	0.090014	0.0368022	0.535115	0.533449	0.536782	0.137926	0.100103	0.272466	0.790557	0.789375	0.791739	0.543371
SL000382	CKB CKM	P12277 P06732	-0.766401	0.0754589	2.61988e-23	0.629717	0.628115	0.631318	-0.451871	0.0816696	1.20607e-06	0.79596	0.794808	0.797113	0.0502755
SL000383	CKM	P06732	-0.940254	0.10485	1.77773e-18	0.622815	0.621224	0.624406	-0.525019	0.104467	1.20939e-05	0.795978	0.79483	0.797125	0.0609263
SL000396	CYCS	P99999	-0.603229	0.139739	3.34556e-05	0.569539	0.567912	0.571165	-0.312899	0.139008	0.0666605	0.790919	0.78974	0.792097	0.537022
SL000403	COL18A1	P39060	1.57258	0.161378	1.46321e-21	0.634398	0.632849	0.635947	0.570902	0.185874	0.0108343	0.790975	0.789804	0.792145	0.281648
SL000406	CCL11	P51671	0.999216	0.121524	9.63745e-16	0.60927	0.607668	0.610871	0.513449	0.136962	0.00141039	0.793152	0.791999	0.794304	0.101732
SL000408	EPO	P01588	0.620611	0.105292	1.07997e-08	0.580462	0.578799	0.582125	0.311244	0.10631	0.0156543	0.79164	0.790479	0.7928	0.296548
SL000415	CFH	P08603	0.0253299	0.278562	0.933282	0.492098	0.490466	0.493731	-0.304661	0.298646	0.432586	0.790111	0.788943	0.791278	0.674805
SL000420	FTH1 FTL	P02794 P02792	-0.0545682	0.0512918	0.309235	0.517732	0.516082	0.519382	-0.0798746	0.0533013	0.235115	0.790892	0.789731	0.792052	0.613661
SL000424	FGA FGB FGG	P02671 P02675 P02679	0.505481	0.22891	0.0352925	0.539983	0.538317	0.541649	0.34672	0.24469	0.259885	0.789555	0.788382	0.790729	0.526882
SL000427	CX3CL1	P78423	1.42093	0.154646	2.52235e-19	0.633729	0.632089	0.635369	0.417177	0.154201	0.025378	0.791851	0.790687	0.793015	0.59614
SL000428	CGA FSHB	P01215, P01225	0.17364	0.0381861	1.19572e-05	0.547247	0.545616	0.548878	-0.0211102	0.0755113	0.839103	0.790206	0.78904	0.791372	0.0157662
SL000433	GCG	P01275	0.240035	0.064474	0.00036726	0.548171	0.546547	0.549794	0.202147	0.0685143	0.0149699	0.792001	0.790823	0.793179	0.210657
SL000437	HP	P00738	0.246893	0.0889489	0.00832057	0.54142	0.53976	0.54308	0.0917398	0.0914514	0.439565	0.792185	0.791018	0.793352	0.158741
SL000440	HPX	P02790	0.140238	0.0743623	0.0707191	0.52596	0.52432	0.527601	-0.0145491	0.07386	0.884607	0.790141	0.788974	0.791308	0.645777
SL000441	HGF	P14210	0.575805	0.114497	1.19774e-06	0.570663	0.569047	0.572279	0.337129	0.121965	0.0226546	0.790738	0.789559	0.791918	0.209928
SL000448	HSPB1	P04792	-0.0931538	0.0445667	0.0463536	0.526735	0.525115	0.528354	0.0354891	0.0521433	0.609385	0.790328	0.789162	0.791493	0.257024
SL000451	HSPA1A	P0DMV8	0.921161	0.157291	1.34458e-08	0.571377	0.569729	0.573025	0.162667	0.180458	0.501379	0.78979	0.788619	0.790962	0.37472
SL000458	IFNGR1	P15260	0.596968	0.175469	0.00114247	0.559229	0.557541	0.560917	0.150265	0.193376	0.561278	0.791098	0.78992	0.792277	0.49248
SL000459	IGHA1 IGHA2	P01876 P01877	0.989568	0.107775	2.62894e-19	0.617436	0.615848	0.619024	0.372347	0.113718	0.00599641	0.790764	0.789594	0.791934	0.500072
SL000460	IGHD IGK@ IGL@	P01880	-0.0621881	0.0293691	0.0435105	0.53385	0.532211	0.53549	-0.00132301	0.0327373	0.978283	0.789985	0.788818	0.791152	0.636979
SL000462	IGFBP1	P08833	0.575887	0.0845482	3.36621e-11	0.587855	0.586284	0.589426	0.243937	0.0925173	0.0301139	0.792147	0.790989	0.793305	0.627801
SL000466	IGFBP2	P18065	1.48916	0.0811771	1.18658e-72	0.726688	0.725367	0.728008	0.579629	0.099453	2.6058e-07	0.799661	0.798519	0.800804	0.253079
SL000467	IGHG1 IGHG2 IGHG3 IGHG4 IGK@ IGL@	P01857	0.412427	0.224231	0.0779678	0.522119	0.520404	0.523834	0.109145	0.21335	0.705857	0.789912	0.788732	0.791092	0.531033
SL000468	IGHM IGJ IGK@ IGL@	P01871	-0.159156	0.0825077	0.065019	0.523296	0.52164	0.524953	-0.0297885	0.0814036	0.77773	0.789844	0.788675	0.791012	0.589672
SL000474	IL16	Q14005	1.05892	0.216793	2.44644e-06	0.563375	0.561685	0.565065	0.551731	0.244283	0.0660319	0.79056	0.789382	0.791738	0.674856
SL000478	IL2	P60568	-0.219761	0.0679166	0.00200467	0.54066	0.539051	0.542268	-0.10428	0.072202	0.250069	0.790775	0.789607	0.791942	0.591113
SL000485	IL9	P15248	0.187326	0.0911554	0.0499234	0.537166	0.535493	0.538838	0.0777264	0.09755	0.548613	0.79077	0.789602	0.791938	0.0772354
SL000496	LTF	P02788	-0.0904827	0.127484	0.49853	0.511823	0.510176	0.513471	0.225114	0.126823	0.157997	0.789968	0.7888	0.791136	0.4202
SL000497	LAMA1 LAMB1 LAMC1	P25391, P07942, P11047	0.141777	0.109785	0.215787	0.518918	0.517265	0.52057	0.0548773	0.130102	0.744029	0.789984	0.788817	0.791151	0.513915
SL000506	CGA LHB	P01215, P01229	0.181404	0.0559771	0.00198031	0.535774	0.53416	0.537388	0.105993	0.0784767	0.284212	0.790335	0.789171	0.791499	0.14171
SL000507	LTA LTB	P01374, Q06643	-1.31992	0.178979	6.49777e-13	0.590092	0.588468	0.591716	-0.306846	0.192892	0.207279	0.791527	0.790354	0.7927	0.702617
SL000508	LTA LTB	P01374, Q06643	-0.461863	0.167297	0.00865056	0.540491	0.538842	0.54214	0.12301	0.176116	0.604597	0.789072	0.787896	0.790249	0.618647
SL000509	LTBR	P36941	0.432481	0.170375	0.0155903	0.543461	0.54175	0.545171	0.175505	0.171411	0.431964	0.789654	0.788475	0.790833	0.5995
SL000510	LYZ	P61626	2.05632	0.286218	2.55347e-12	0.592156	0.590535	0.593776	0.415264	0.305748	0.281727	0.790417	0.789245	0.791588	0.195642
SL000516	CCL7	P80098	0.420667	0.100073	5.41153e-05	0.571985	0.570352	0.573619	0.193811	0.110063	0.16121	0.79039	0.789223	0.791557	0.0256906
SL000519	CCL3	P10147	0.549858	0.096008	2.80444e-08	0.579955	0.578284	0.581627	0.233603	0.10725	0.0768588	0.790666	0.789491	0.79184	0.562384
SL000521	MMP1	P03956	0.369118	0.0556153	1.07435e-10	0.582145	0.580523	0.583768	0.218496	0.0588566	0.0016106	0.79247	0.791307	0.793634	0.662944
SL000522	MMP12	P39900	1.3591	0.0785586	4.34152e-65	0.716808	0.715416	0.7182	0.517382	0.0994055	5.05802e-06	0.79445	0.793283	0.795617	0.646454
SL000525	MMP7	P09237	1.08895	0.0979187	1.05887e-27	0.645026	0.643429	0.646623	0.509999	0.102869	1.54751e-05	0.793943	0.792792	0.795095	0.423246
SL000526	MMP8	P22894	-0.230149	0.142534	0.120436	0.525996	0.524269	0.527724	0.19742	0.140287	0.263964	0.791254	0.790084	0.792425	0.58847
SL000528	POR	P16435	-0.2405	0.0922979	0.0130898	0.537191	0.535525	0.538857	0.0610112	0.0988469	0.640369	0.789971	0.788803	0.791138	0.553325
SL000541	PLG	P00747	-0.751823	0.170959	2.35849e-05	0.574506	0.572823	0.57619	-0.011631	0.151698	0.953532	0.790308	0.789139	0.791477	0.580133
SL000545	KLKB1	P03952	-1.71822	0.19326	3.46751e-18	0.621658	0.620037	0.623279	-0.865229	0.217115	0.000662735	0.793764	0.792592	0.794937	0.339647
SL000546	PRL	P01236	0.126714	0.103201	0.239763	0.521785	0.520149	0.52342	0.28975	0.105046	0.0227311	0.790005	0.788827	0.791183	0.607853
SL000550	SERPINA5	P05154	0.0465776	0.0175757	0.0116928	0.53114	0.529558	0.532722	0.0155294	0.0185261	0.539358	0.790452	0.789285	0.791619	0.350993
SL000551	PRKCA	P17252	-0.0703072	0.0392651	0.085896	0.522632	0.520987	0.524276	0.0333012	0.0455015	0.587986	0.79033	0.789166	0.791495	0.472429
SL000556	PRKCG	P05129	0.233524	0.128149	0.0802444	0.531026	0.529378	0.532673	0.169759	0.134083	0.318507	0.789577	0.7884	0.790754	0.236838
SL000558	F2	P00734	-1.94206	0.2359	8.9713e-16	0.606815	0.605253	0.608377	-0.867501	0.242728	0.00241866	0.793883	0.792734	0.795031	0.610351
SL000565	REN	P00797	0.705224	0.0736196	6.98941e-21	0.618459	0.616868	0.620049	0.292536	0.0819375	0.00241866	0.791899	0.790733	0.793066	0.433577
SL000572	SAA1	P0DJI8	0.0652216	0.0397743	0.115004	0.509764	0.508104	0.511424	0.0597597	0.0391336	0.226676	0.790236	0.789068	0.791404	0.575387
SL000573	APCS	P02743	0.158481	0.193579	0.43572	0.502867	0.501199	0.504535	-0.0662271	0.205066	0.808853	0.789595	0.788423	0.790767	0.629993
SL000581	SOD1	P00441	0.175757	0.0912377	0.0652924	0.541956	0.54035	0.543562	0.166312	0.101491	0.19432	0.791275	0.790111	0.79244	0.446943
SL000586	F2	P00734	-0.265485	0.0460549	2.27812e-08	0.583236	0.581654	0.584817	-0.126553	0.0483643	0.0314154	0.792115	0.790949	0.79328	0.39179
SL000589	CGA TSHB	P01215 P01222	-0.194944	0.0827996	0.0249018	0.536803	0.53517	0.538436	-0.0506598	0.0789785	0.629547	0.790276	0.789102	0.791451	0.104679
SL000591	TIMP1	P01033	1.79912	0.157017	2.63081e-29	0.658034	0.656547	0.659521	1.05626	0.191326	1.22096e-06	0.796513	0.795369	0.797657	0.121847
SL000592	TIMP2	P16035	1.72795	0.225207	6.98313e-14	0.595233	0.593616	0.59685	0.692866	0.248193	0.0215005	0.79233	0.791178	0.793481	0.459697
SL000601	TF	P02787	-0.917808	0.383705	0.0225877	0.534622	0.532972	0.536272	-0.45549	0.388148	0.360066	0.790339	0.789169	0.791508	0.640355
SL000605	RPS27A	P62979	0.0902126	0.0611532	0.156778	0.535219	0.533611	0.536828	0.15504	0.0736719	0.0884818	0.791286	0.79012	0.792452	0.261252
SL000613	PLAU	P00749	0.984374	0.175832	5.7961e-08	0.573589	0.571927	0.575251	0.250909	0.197391	0.316462	0.790218	0.789054	0.791382	0.581163
SL000616	VTN	P04004	-0.684945	0.151728	1.39238e-05	0.559508	0.557863	0.561153	-0.350244	0.153949	0.063987	0.790283	0.789109	0.791457	0.378278
SL000622	F5	P12259	0.0499391	0.117356	0.687339	0.508079	0.506435	0.509723	0.0448867	0.138352	0.808853	0.789565	0.788394	0.790736	0.627124
SL000638	CDH2	P19022	0.213565	0.104207	0.0505051	0.532946	0.531262	0.53463	0.190637	0.107426	0.157997	0.790904	0.789729	0.792079	0.27097
SL000640	NID1	P14543	0.7432	0.141933	4.08686e-07	0.572712	0.571092	0.574333	0.549527	0.157583	0.0031115	0.792205	0.791054	0.793356	0.0884964
SL000645	MMP10	P09238	0.373291	0.115274	0.00199181	0.553708	0.552044	0.555373	0.140528	0.125244	0.382203	0.789653	0.78848	0.790826	0.466036
SL000658	GAS1	P54826	2.91261	0.199892	1.1197e-46	0.677923	0.6764	0.679446	1.33623	0.246535	1.93956e-06	0.79569	0.794534	0.796847	0.0672442
SL000678	GNLY	P22749	0.730991	0.119736	3.09785e-09	0.578432	0.576823	0.580041	0.167419	0.120958	0.270694	0.79027	0.789103	0.791437	0.409863
SL000695	LCN2	P80188	2.24566	0.194339	8.67675e-30	0.642888	0.641301	0.644475	0.909069	0.212478	0.000250068	0.792654	0.79148	0.793828	0.023663
SL000836	HBA1 HBB	P69905, P68871	-0.316276	0.101389	0.00290535	0.548291	0.546627	0.549955	-0.197894	0.097092	0.10013	0.791488	0.790327	0.792649	0.770277
SL001691	FGF7	P21781	0.171804	0.0832433	0.0489556	0.546789	0.545177	0.548401	0.186113	0.104667	0.157934	0.790346	0.789178	0.791514	0.309826
SL001720	VCAM1	P19320	1.59409	0.167046	9.83082e-21	0.625517	0.623924	0.627111	0.302753	0.184142	0.193378	0.791038	0.78987	0.792207	0.567151
SL001726	CSF2	P04141	0.340401	0.0931256	0.000475102	0.550749	0.549074	0.552424	0.177262	0.100899	0.16213	0.790162	0.788984	0.791339	0.187842
SL001728	PDGFRA	P16234	0.732899	0.139768	3.95625e-07	0.585769	0.584092	0.587446	0.268501	0.15167	0.158466	0.789678	0.788504	0.790851	0.223704
SL001729	CSF3	P09919	0.717546	0.156763	1.0503e-05	0.552525	0.550834	0.554215	0.314239	0.163402	0.120199	0.790082	0.788898	0.791265	0.324677
SL001761	TNNI3	P19429	0.492138	0.142146	0.00093511	0.554491	0.552828	0.556155	0.319199	0.147842	0.0790565	0.792343	0.791173	0.793513	0.729626
SL001766	CGA CGB	P01215,P01233	0.12219	0.0363875	0.00133092	0.539846	0.538223	0.541469	-0.0474932	0.0570296	0.539358	0.78996	0.788794	0.791127	0.115298
SL001774	FABP3	P05413	0.676746	0.105425	4.50385e-10	0.571758	0.570125	0.573391	0.352961	0.132957	0.0290305	0.790951	0.789785	0.792117	0.354267
SL001777	CST3	P01034	3.10927	0.180649	1.7655e-64	0.704162	0.702728	0.705596	1.16272	0.219797	3.46281e-06	0.796739	0.795582	0.797897	0.301543
SL001791	BGLAP	P02818	-0.161281	0.0950397	0.103904	0.532608	0.530917	0.5343	0.0157245	0.0923934	0.900838	0.788024	0.786841	0.789208	0.666193
SL001796	MPO	P05164	0.658617	0.135523	2.74162e-06	0.570239	0.568613	0.571866	0.51548	0.135709	0.00124734	0.791488	0.790324	0.792651	0.547634
SL001797	KLK6	Q92876	1.05786	0.223838	5.28605e-06	0.553498	0.551788	0.555207	0.320101	0.227995	0.264901	0.790199	0.789022	0.791376	0.595507
SL001800	TNFRSF1B	P20333	2.20805	0.141929	5.76119e-53	0.696369	0.694907	0.697831	0.839713	0.176228	3.51384e-05	0.795681	0.794525	0.796837	0.0344678
SL001802	IFNG	P01579	0.195572	0.154066	0.223904	0.519277	0.517601	0.520952	-0.258853	0.164436	0.2117	0.789831	0.788648	0.791015	0.660225
SL001815	SOD2	P04179	-1.88485	0.243808	4.5153e-14	0.597568	0.595966	0.599171	-0.887572	0.247066	0.00231802	0.793629	0.792468	0.79479	0.0980747
SL001880	IFNB1	P01574	0.249748	0.119834	0.04696	0.53223	0.530584	0.533876	0.117155	0.122487	0.468327	0.791851	0.790674	0.793028	0.0751221
SL001888	SLPI	P03973	2.67295	0.203644	4.78011e-38	0.66188	0.660338	0.663421	0.944952	0.232717	0.000549584	0.793858	0.792702	0.795014	0.603347
SL001896	CLU	P10909	0.567422	0.186266	0.00367868	0.534323	0.532647	0.535998	0.222682	0.195729	0.374991	0.790845	0.789675	0.792014	0.650406
SL001902	BCAM	P50895	0.944181	0.194161	2.71904e-06	0.556419	0.554719	0.55812	0.0849842	0.212575	0.758014	0.791021	0.789854	0.792188	0.283006
SL001938	INHBA	P08476	1.08641	0.16787	3.20148e-10	0.579933	0.57826	0.581606	0.16265	0.185735	0.519149	0.790413	0.78924	0.791587	0.700833
SL001943	IL6R	P08887	0.23487	0.15726	0.151604	0.513307	0.511654	0.514959	-0.0323355	0.16026	0.882102	0.789937	0.788768	0.791107	0.668374
SL001947	MIA	Q16674	0.951845	0.162915	1.45461e-08	0.582851	0.581232	0.584469	0.354465	0.182293	0.117175	0.790301	0.789124	0.791478	0.627159
SL001990	IL1RN	P18510	0.661984	0.120591	1.06673e-07	0.577288	0.575684	0.578893	0.58785	0.130209	9.30733e-05	0.7948	0.793632	0.795968	0.0718856
SL001992	TNFRSF1A	P19438	2.21714	0.126604	1.25124e-66	0.713856	0.712455	0.715258	1.04543	0.171716	1.06233e-07	0.797406	0.796251	0.798561	0.156195
SL001995	ANGPT1	Q15389	0.150068	0.0752897	0.0567087	0.526805	0.525136	0.528473	0.189614	0.0787004	0.0493105	0.790654	0.789497	0.791812	0.106782
SL001996	ANGPT2	O15123	1.80432	0.148484	7.63105e-33	0.642847	0.641289	0.644406	0.995356	0.166104	1.34642e-07	0.800335	0.799209	0.80146	0.384835
SL001997	IL1R1	P14778	1.66377	0.233637	3.95815e-12	0.599249	0.597575	0.600923	0.297986	0.236646	0.320048	0.791065	0.789892	0.792238	0.672443
SL001998	TFPI	P10646	0.929689	0.175348	2.92453e-07	0.559108	0.557461	0.560756	0.283536	0.192977	0.243496	0.789307	0.788133	0.79048	0.616629
SL002093	H2AFZ	P0C0S5	0.473955	0.105037	1.40114e-05	0.566647	0.565016	0.568279	0.410522	0.121947	0.00446636	0.7917	0.790537	0.792862	0.385891
SL002505	NPPA	P01160	0.288023	0.0868196	0.00153192	0.557475	0.555861	0.559088	0.32082	0.095911	0.00474068	0.793038	0.791888	0.794189	0.176349
SL002506	PLAUR	Q03405	2.41659	0.172486	3.13141e-43	0.683426	0.681955	0.684898	0.95913	0.20626	5.53813e-05	0.797005	0.795844	0.798165	0.270689
SL002508	IL18BP	O95998	2.0351	0.156505	2.23962e-37	0.670492	0.668973	0.672011	0.548101	0.189974	0.0173265	0.792637	0.79147	0.793803	0.176905
SL002517	TNF	P01375	0.519352	0.148676	0.000844361	0.560028	0.558368	0.561687	0.450606	0.161438	0.0215005	0.792385	0.791222	0.793548	0.17012
SL002519	ERBB3	P21860	-2.34231	0.261341	1.8422e-18	0.615433	0.61383	0.617036	-0.821293	0.283871	0.0173265	0.792971	0.791805	0.794138	0.639636
SL002522	RB1	P06400	-0.21498	0.12781	0.106843	0.524059	0.522379	0.525738	0.26188	0.126232	0.093058	0.791118	0.789947	0.792288	0.263598
SL002524	CD4	P01730	0.406764	0.138002	0.00502512	0.549129	0.547498	0.55076	0.434152	0.15567	0.0215166	0.791607	0.790434	0.79278	0.392902
SL002525	C2	P06681	-0.139442	0.260248	0.610859	0.504517	0.502866	0.506168	-0.419408	0.25907	0.199017	0.790312	0.789141	0.791484	0.649381
SL002528	PLA2G2A	P14555	0.88442	0.0898491	5.74175e-22	0.611361	0.60974	0.612982	0.462853	0.102788	9.48297e-05	0.795024	0.793851	0.796197	0.323065
SL002539	TNFRSF11B	O00300	0.511941	0.170539	0.00421884	0.538562	0.536888	0.540237	0.0732542	0.164588	0.735332	0.790296	0.789118	0.791474	0.534891
SL002561	PTHLH	P12272	0.215525	0.107111	0.0546045	0.527629	0.52599	0.529267	0.0248991	0.119635	0.878554	0.790435	0.789262	0.791608	0.679448
SL002602	TFF2	Q03403	0.88975	0.115367	5.18834e-14	0.604193	0.602557	0.605829	0.275874	0.129176	0.0831763	0.791716	0.790552	0.79288	0.32285
SL002621	MDK	P21741	0.18212	0.0725617	0.0168005	0.533876	0.532252	0.5355	0.0937604	0.0881578	0.410922	0.789791	0.788616	0.790966	0.579982
SL002640	PGF	P49763	0.275019	0.12117	0.0305454	0.535108	0.533442	0.536773	0.219558	0.123505	0.157934	0.790247	0.789072	0.791422	0.29644
SL002644	EGFR	P00533	-4.66525	0.301348	1.7778e-52	0.687448	0.685956	0.688939	-1.711	0.342809	1.39574e-05	0.795863	0.794701	0.797024	0.253825
SL002654	EPHA2	P29317	2.64356	0.147849	2.74405e-69	0.710262	0.708834	0.711689	1.17343	0.189955	7.36243e-08	0.797131	0.795961	0.798301	0.333516
SL002662	F11	P03951	-1.14031	0.171574	1.01461e-10	0.589841	0.588194	0.591489	-0.5181	0.190121	0.0243288	0.790679	0.78951	0.791848	0.261773
SL002684	CSF1	P09603	1.08445	0.147924	8.95197e-13	0.611774	0.610197	0.613352	0.501115	0.173904	0.0173265	0.793546	0.792379	0.794712	0.281731
SL002688	SPP1	P10451	1.23407	0.0957821	9.47707e-37	0.668053	0.666498	0.669609	0.532176	0.117957	9.30733e-05	0.793565	0.792398	0.794733	0.470606
SL002704	PTN	P21246	1.56363	0.0883678	6.00932e-68	0.71562	0.714217	0.717023	0.337337	0.14403	0.0570222	0.79002	0.788843	0.791198	0.556538
SL002706	FCER2	P06734	0.523504	0.120637	3.04794e-05	0.549329	0.547673	0.550985	0.0964353	0.12092	0.548613	0.790485	0.78931	0.79166	0.578229
SL002722	CD38	P28907	0.346132	0.15053	0.0284227	0.537023	0.535345	0.538702	0.23891	0.153896	0.219854	0.791366	0.79019	0.792541	0.685156
SL002731	FAS	P25445	1.61504	0.179815	1.59249e-18	0.61029	0.608722	0.611859	0.36704	0.209838	0.163462	0.790862	0.789692	0.792032	0.322884
SL002755	PAPPA	Q13219	1.14846	0.101166	8.71704e-29	0.649014	0.647454	0.650575	0.324041	0.115613	0.0210068	0.792461	0.791287	0.793635	0.290894
SL002762	CHGA	P10645	0.212107	0.0336092	8.8488e-10	0.60188	0.6003	0.603461	0.0824749	0.0336687	0.0460902	0.792406	0.791241	0.793572	0.06507
SL002785	NPPB	P16860	0.869876	0.0505931	2.14605e-64	0.713556	0.712163	0.714949	0.356459	0.059098	1.23771e-07	0.800165	0.799041	0.80129	0.276407
SL002792	ADRBK1	P25098	-0.129307	0.0475418	0.00968509	0.536774	0.535125	0.538423	0.000769429	0.0557061	0.990501	0.790166	0.789	0.791331	0.558392
SL002823	SELL	P14151	-1.49981	0.21045	3.82441e-12	0.591492	0.589839	0.593144	-0.297249	0.226598	0.300302	0.790216	0.789047	0.791386	0.520753
SL003060	FGFR1	P11362	1.9592	0.240246	1.62406e-15	0.601952	0.600333	0.60357	0.447023	0.272093	0.193378	0.790233	0.789066	0.7914	0.637583
SL003066	SERPINF1	P36955	0.835536	0.267171	0.00284243	0.531125	0.529418	0.532832	0.183226	0.264121	0.604597	0.789574	0.788403	0.790746	0.290405
SL003080	MIF	P14174	0.140498	0.085974	0.116133	0.537465	0.535873	0.539057	0.186479	0.11046	0.182465	0.790949	0.789782	0.792115	0.22435
SL003166	ALCAM	Q13740	1.00686	0.264198	0.00026422	0.550856	0.549254	0.552458	0.00619635	0.294868	0.989162	0.79034	0.789174	0.791506	0.56265
SL003167	CXCL13	O43927	0.896729	0.0927682	3.0653e-21	0.638472	0.636893	0.640051	0.577222	0.107409	2.38667e-06	0.795892	0.794728	0.797056	0.0903522
SL003172	CXCL6	P80162	0.0837291	0.0629144	0.201959	0.525781	0.524129	0.527434	0.139131	0.071161	0.115501	0.789827	0.788663	0.79099	0.171241
SL003173	CXCL1	P09341	0.0938405	0.0677659	0.184234	0.523682	0.52204	0.525324	0.152528	0.0763856	0.10659	0.790475	0.789311	0.791638	0.488931
SL003176	CCL1	P22362	0.712205	0.180917	0.000162014	0.552956	0.551245	0.554667	0.409831	0.189544	0.0788305	0.789875	0.788698	0.791053	0.529642
SL003177	ICAM2	P13598	0.440848	0.170157	0.0136091	0.538699	0.537072	0.540325	0.312389	0.202454	0.221659	0.790517	0.789342	0.791693	0.569498
SL003179	ITGA1 ITGB1	P56199, P05556	0.394216	0.0971869	9.98795e-05	0.564624	0.563003	0.566245	0.291733	0.122383	0.052181	0.791049	0.789884	0.792215	0.422727
SL003182	ITGAV ITGB5	P06756, P18084	-0.0769301	0.165677	0.660674	0.515773	0.514032	0.517513	-0.624551	0.193425	0.00688122	0.792286	0.79111	0.793462	0.33525
SL003183	CXCL10	P02778	0.64256	0.085185	1.89069e-13	0.613858	0.612255	0.61546	0.158376	0.100382	0.210798	0.789114	0.787943	0.790284	0.104441
SL003184	LEPR	P48357	0.0654871	0.0739455	0.398473	0.518714	0.517105	0.520323	-0.0296825	0.0664524	0.735305	0.790172	0.789001	0.791343	0.401359
SL003188	CXCL9	Q07325	0.74155	0.0782764	1.87451e-20	0.641785	0.640233	0.643337	0.143195	0.0997166	0.253349	0.789792	0.78861	0.790973	0.0989043
SL003189	CCL19	Q99731	0.422419	0.0947232	1.78262e-05	0.560244	0.558623	0.561866	0.298706	0.0976862	0.0112515	0.790863	0.789693	0.792034	0.163039
SL003190	CCL15	Q16663	1.3091	0.119938	9.96705e-27	0.656464	0.654941	0.657987	0.688565	0.139198	1.58557e-05	0.795378	0.794217	0.796538	0.387648
SL003196	CCL17	Q92583	0.115102	0.0581076	0.0582586	0.533097	0.53148	0.534714	0.100326	0.063539	0.210798	0.790028	0.788861	0.791195	0.438688
SL003197	CCL25	O15444	-0.442911	0.0900121	2.05025e-06	0.573145	0.571503	0.574788	-0.211773	0.0914258	0.0596937	0.792766	0.791608	0.793924	0.650243
SL003198	TNC	P24821	0.718469	0.153607	6.66129e-06	0.558863	0.557211	0.560515	0.270136	0.154228	0.163462	0.790929	0.789771	0.792088	0.558071
SL003199	TIE1	P35590	0.767989	0.220925	0.000892275	0.54629	0.54467	0.547911	0.391522	0.227177	0.169885	0.791007	0.78985	0.792165	0.657398
SL003201	KDR	P35968	-2.24634	0.242676	1.36123e-19	0.619028	0.617409	0.620647	-0.483427	0.255224	0.126733	0.791355	0.790184	0.792526	0.535863
SL003300	CCL16	O15467	0.995901	0.134616	5.51764e-13	0.597742	0.596093	0.599391	0.358929	0.142182	0.0392911	0.791	0.789817	0.792182	0.66218
SL003301	CCL23	P55773	1.6035	0.181773	6.34206e-18	0.613122	0.611436	0.614809	0.443658	0.187368	0.0539238	0.791237	0.790055	0.792419	0.47926
SL003302	CCL23	P55773	1.52531	0.15741	2.45973e-21	0.61836	0.61667	0.62005	0.52414	0.165581	0.00826207	0.791748	0.790566	0.792931	0.635865
SL003303	CCL28	Q9NRJ3	0.325247	0.0747866	2.92866e-05	0.557348	0.555718	0.558978	0.25773	0.0805819	0.00756087	0.791979	0.790815	0.793143	0.179343
SL003304	IGF1R	P08069	1.3143	0.287846	1.10087e-05	0.553517	0.551841	0.555193	0.205895	0.293066	0.604567	0.789925	0.788752	0.791098	0.634307
SL003310	VEGFA	P15692	0.198435	0.0722359	0.00895856	0.531746	0.530051	0.533441	0.212913	0.0727047	0.0156543	0.790345	0.789175	0.791515	0.103339
SL003323	CCL18	P55774	1.19972	0.103467	5.56742e-30	0.649608	0.648064	0.651151	0.318434	0.117645	0.025378	0.792222	0.791058	0.793385	0.614369
SL003324	F10	P00742	-1.49291	0.182888	1.5309e-15	0.59922	0.597592	0.600847	-0.412857	0.204567	0.103353	0.7909	0.789738	0.792062	0.215558
SL003326	CXCL11	O14625	0.330581	0.0615414	2.0231e-07	0.583027	0.581422	0.584632	0.254429	0.0737297	0.00349827	0.792109	0.790948	0.79327	0.0122355
SL003327	CFD	P00746	2.00592	0.162695	9.31965e-34	0.66501	0.663463	0.666556	0.547851	0.196783	0.0217078	0.793038	0.791876	0.7942	0.643761
SL003328	CFI	P05156	0.0648806	0.267875	0.819957	0.492278	0.490619	0.493937	-0.188658	0.283775	0.620556	0.789305	0.788132	0.790479	0.603824
SL003329	CCL14	Q16627	1.58039	0.122453	7.73554e-37	0.662498	0.66102	0.663976	0.838061	0.141	1.51443e-07	0.797638	0.796503	0.798773	0.00743283
SL003332	MMP17	Q9ULZ9	0.588086	0.138268	4.36839e-05	0.554506	0.552868	0.556145	0.471674	0.148989	0.00826207	0.792553	0.791388	0.793718	0.465217
SL003340	CHI3L1	P36222	0.534645	0.047203	1.12768e-28	0.644401	0.642855	0.645947	0.161431	0.0497416	0.00658258	0.793623	0.792463	0.794784	0.583548
SL003341	FGG	P02679	0.35638	0.110253	0.00201822	0.560233	0.558597	0.561868	0.274329	0.119329	0.0616834	0.790645	0.789479	0.791811	0.587731
SL003522	ERP29	P30040	1.13889	0.137116	4.95488e-16	0.595314	0.593662	0.596967	0.573452	0.142172	0.000587258	0.792365	0.791187	0.793543	0.548874
SL003542	EHMT2	Q96KQ7	-0.373767	0.0746428	1.33512e-06	0.572962	0.571342	0.574581	-0.259502	0.0768364	0.00433168	0.792706	0.791536	0.793876	0.00891915
SL003643	GSTP1	P09211	0.371737	0.0790698	5.94436e-06	0.569804	0.568219	0.571388	0.17547	0.0970074	0.149937	0.790948	0.789784	0.792113	0.215703
SL003646	TPM4	P67936	-0.0788339	0.0447197	0.0909145	0.521865	0.520238	0.523492	0.0224946	0.0522167	0.740562	0.790495	0.789331	0.791659	0.428066
SL003650	ENO1	P06733	-0.0615692	0.031669	0.0628912	0.523736	0.522084	0.525388	0.0339704	0.0398795	0.533671	0.790333	0.789166	0.7915	0.456351
SL003672	SOD3	P08294	1.11629	0.164396	3.85613e-11	0.586422	0.584751	0.588092	0.168556	0.203617	0.539561	0.792603	0.791414	0.793792	0.486904
SL003679	IGF2R	P11717	0.90033	0.241467	0.000361247	0.543921	0.542277	0.545566	0.550453	0.251398	0.075567	0.792196	0.791037	0.793356	0.610447
SL003685	NAMPT	P43490	-0.00323691	0.113476	0.980255	0.501633	0.499946	0.50332	-0.162311	0.112331	0.250069	0.790539	0.789368	0.791709	0.549194
SL003703	BCL2A1	Q16548	0.398058	0.151104	0.0121961	0.545016	0.543365	0.546668	0.101759	0.161497	0.633773	0.790534	0.789359	0.791709	0.453364
SL003704	BID	P55957	0.127393	0.0597461	0.0421076	0.535725	0.534142	0.537309	0.179607	0.0697202	0.0345995	0.790578	0.789408	0.791747	0.47058
SL003711	CASP3	P42574	-0.0866392	0.0432476	0.0555528	0.523378	0.521759	0.524997	0.0193103	0.0495572	0.763654	0.790387	0.789223	0.791551	0.35362
SL003733	DIABLO	Q9NR28	0.568399	0.135196	5.41153e-05	0.571154	0.569555	0.572753	0.316142	0.154907	0.0998674	0.789826	0.788654	0.790999	0.526343
SL003739	TNFRSF6B	O95407	0.318862	0.11885	0.0107015	0.54599	0.544326	0.547655	0.359348	0.125239	0.0178537	0.791161	0.789989	0.792333	0.0824231
SL003744	LGALS3	P17931	2.05319	0.242548	1.33302e-16	0.61043	0.608849	0.612012	0.300508	0.266262	0.378985	0.78977	0.788597	0.790942	0.577843
SL003753	DYNLL1	P63167	-0.240544	0.0844709	0.0067942	0.538298	0.536617	0.539979	-0.0854828	0.0826453	0.427287	0.792669	0.791505	0.793833	0.57407
SL003755	MCL1	Q07820	0.411549	0.113989	0.000555911	0.560133	0.558492	0.561775	0.229915	0.121048	0.125648	0.790024	0.788841	0.791207	0.456387
SL003761	PTEN	P60484	0.245611	0.0904868	0.00980331	0.545343	0.543708	0.546979	0.155424	0.101385	0.224665	0.791109	0.789936	0.792282	0.203233
SL003764	NCAM1	P13591	0.610172	0.228062	0.0108684	0.53292	0.531298	0.534542	-0.360224	0.233309	0.221659	0.791057	0.789892	0.792222	0.392784
SL003770	SFRP1	Q8N474	0.595749	0.135889	2.50249e-05	0.551391	0.549663	0.553119	-0.0166796	0.140097	0.929503	0.788948	0.787762	0.790134	0.739863
SL003774	BCL2L2	Q92843	0.220733	0.119887	0.0777842	0.535575	0.533946	0.537204	0.180665	0.139905	0.309124	0.79051	0.789339	0.79168	0.267801
SL003785	GAPDH	P04406	0.0398253	0.0439972	0.388021	0.516792	0.515164	0.51842	-0.0219556	0.0496219	0.735629	0.789774	0.788606	0.790942	0.648041
SL003803	ERBB4	Q15303	-0.48608	0.175597	0.00847568	0.538453	0.536757	0.540149	0.10135	0.177364	0.667115	0.790084	0.788906	0.791262	0.506246
SL003869	GDF15	Q99988	1.78583	0.0861048	9.78942e-93	0.751791	0.750519	0.753063	1.02945	0.122991	3.74615e-14	0.803893	0.802763	0.805022	0.50991
SL003872	IL6ST	P40189	1.78943	0.291647	2.605e-09	0.581319	0.579679	0.582958	0.423473	0.29851	0.259749	0.790289	0.789124	0.791454	0.488145
SL003916	KLK12	Q9UKR0	0.457747	0.13153	0.00088164	0.541653	0.539988	0.543318	0.161861	0.134024	0.344718	0.790532	0.789361	0.791703	0.495039
SL003970	PTH	P01270	1.08815	0.115012	2.08688e-20	0.609342	0.607718	0.610967	0.46219	0.118518	0.000908569	0.792214	0.791059	0.793368	0.464056
SL003993	BMP6	P22004	0.780048	0.206813	0.000308559	0.542321	0.540638	0.544005	0.174246	0.214726	0.54305	0.790435	0.789264	0.791606	0.616165
SL003994	BMP1	P13497	-1.36762	0.152388	1.68309e-18	0.61959	0.617988	0.621193	-0.299012	0.149666	0.10659	0.791729	0.790562	0.792896	0.216758
SL004008	PRTN3	P24158	0.631753	0.126542	1.43751e-06	0.566977	0.565365	0.568589	0.512681	0.128676	0.000662735	0.794103	0.792944	0.795261	0.691852
SL004010	KIT	P10721	-0.95658	0.132905	2.33496e-12	0.601334	0.599708	0.602959	-0.363485	0.144356	0.0398123	0.79103	0.789858	0.792203	0.0316532
SL004016	CXCL16	Q9H2A7	1.98261	0.228337	2.04371e-17	0.607347	0.605778	0.608915	0.766165	0.252457	0.0119598	0.791982	0.790828	0.793136	0.518872
SL004070	RPS27A	P62979	0.153811	0.110088	0.180372	0.52564	0.523966	0.527314	0.147265	0.120617	0.338631	0.790144	0.788962	0.791326	0.611441
SL004081	DCN	P07585	0.259795	0.158013	0.114457	0.52686	0.525192	0.528528	0.24189	0.169581	0.256652	0.790216	0.789052	0.79138	0.183901
SL004118	ACP5	P13686	0.580537	0.178759	0.00193779	0.534607	0.532954	0.536261	-0.140859	0.182278	0.563419	0.790358	0.78919	0.791526	0.169809
SL004120	DDR2	Q16832	0.554534	0.113244	2.30595e-06	0.574658	0.573071	0.576245	0.30121	0.123497	0.0472287	0.791786	0.790609	0.792963	0.447424
SL004125	INSR	P06213	0.0686599	0.188687	0.731681	0.505999	0.504246	0.507752	-0.268653	0.184625	0.248187	0.792048	0.790892	0.793205	0.644223
SL004126	TNFRSF9	Q07011	0.722758	0.135516	2.49055e-07	0.590908	0.589279	0.592538	0.348064	0.154899	0.0668309	0.791141	0.789967	0.792315	0.564645
SL004134	CD27	P26842	-1.17097	0.220804	2.91646e-07	0.583571	0.581934	0.585207	-0.485611	0.212312	0.0625105	0.791731	0.790562	0.7929	0.12842
SL004137	EPHA1	P21709	0.944306	0.156956	5.25383e-09	0.57547	0.573805	0.577134	0.0644673	0.150754	0.740589	0.79009	0.788909	0.791272	0.52832
SL004140	EFNA4	P52798	3.0622	0.19948	1.26249e-51	0.68256	0.681051	0.684068	1.50885	0.24107	6.30637e-08	0.79905	0.797895	0.800206	0.175733
SL004141	EFNA5	P52803	2.86055	0.232827	1.52124e-33	0.645626	0.644014	0.647239	0.900581	0.255578	0.00279831	0.79331	0.792144	0.794476	0.341118
SL004143	GFRA2	O00451	1.67008	0.19123	1.37558e-17	0.609618	0.608035	0.611201	0.536413	0.214759	0.041681	0.791409	0.790239	0.792579	0.552969
SL004145	TNFRSF14	Q92956	0.539854	0.164933	0.00177975	0.557546	0.555894	0.559199	0.406315	0.186506	0.0768588	0.791962	0.79079	0.793135	0.0473314
SL004146	IL1RL1	Q01638	0.810721	0.110675	9.24269e-13	0.597961	0.59635	0.599571	0.430981	0.122614	0.00283511	0.7917	0.790539	0.792862	0.211213
SL004147	IL10RB	Q08334	0.421146	0.169656	0.0180782	0.531826	0.530117	0.533535	0.326761	0.171374	0.12397	0.792042	0.790871	0.793212	0.583758
SL004149	IL13RA1	P78552	0.736141	0.179375	8.1866e-05	0.543208	0.541595	0.544821	0.0715285	0.177052	0.755882	0.789787	0.788614	0.790959	0.354691
SL004151	IL15RA	Q13261	1.03533	0.13022	8.33045e-15	0.615025	0.613438	0.616612	0.374025	0.152021	0.0449542	0.79181	0.790642	0.792978	0.458878
SL004152	IL18R1	Q13478	0.785112	0.168687	7.40091e-06	0.557578	0.555924	0.559233	0.264378	0.171535	0.221659	0.790431	0.789266	0.791595	0.447145
SL004153	CSF1R	P07333	0.586127	0.150019	0.000181035	0.54959	0.547968	0.551211	0.105619	0.163928	0.628471	0.790039	0.788869	0.791209	0.596723
SL004154	L1CAM	P32004	-0.000357682	0.201704	0.998585	0.506125	0.504388	0.507863	-0.501354	0.212558	0.0550217	0.790854	0.789677	0.792031	0.0162365
SL004155	PDGFRB	P09619	0.13429	0.0884771	0.145115	0.5114	0.509754	0.513046	-0.0599979	0.0879514	0.609385	0.790592	0.78942	0.791764	0.118943
SL004157	TNFRSF10B	O14763	0.147481	0.0962277	0.141447	0.525975	0.524332	0.527619	0.218249	0.102565	0.0844653	0.79113	0.789969	0.792292	0.310044
SL004159	TNFRSF10D	Q9UBN6	0.551863	0.139006	0.000142182	0.560269	0.55861	0.561929	0.413946	0.150116	0.0227311	0.791957	0.790785	0.79313	0.366967
SL004160	NTRK2	Q16620	0.0216409	0.250718	0.935527	0.495568	0.493909	0.497227	-0.59568	0.267135	0.0689983	0.790815	0.789635	0.791995	0.0444752
SL004180	TNFRSF8	P28908	0.781217	0.149148	4.06722e-07	0.584341	0.582688	0.585994	0.453943	0.17246	0.0301822	0.79004	0.788865	0.791215	0.354272
SL004183	CDH3	P22223	-1.17773	0.284219	6.95178e-05	0.55397	0.552266	0.555673	-0.438518	0.290179	0.23128	0.789563	0.788381	0.790744	0.241104
SL004208	ANXA1	P04083	0.628915	0.145988	3.4708e-05	0.559823	0.558164	0.561483	0.321751	0.167218	0.120199	0.790511	0.789342	0.791681	0.630281
SL004209	ANXA2	P07355	0.478176	0.105088	1.18243e-05	0.578642	0.577037	0.580247	0.206178	0.126006	0.19432	0.790264	0.789096	0.791432	0.337455
SL004258	ADIPOQ	Q15848	0.66484	0.108684	2.897e-09	0.57859	0.576987	0.580194	0.20008	0.119837	0.187404	0.790271	0.789102	0.791439	0.63664
SL004260	RETN	Q9HD89	0.887023	0.121072	9.21462e-13	0.593753	0.592111	0.595395	0.391505	0.126405	0.010013	0.790437	0.789256	0.791617	0.191374
SL004269	GHRL	Q9UBU3	-0.345517	0.117489	0.0051221	0.543981	0.542329	0.545633	0.0991492	0.114841	0.527244	0.789767	0.788596	0.790939	0.563351
SL004298	GZMA	P12544	0.953065	0.179919	2.97888e-07	0.567081	0.565454	0.568707	0.508087	0.182714	0.0217917	0.791294	0.790123	0.792464	0.147114
SL004304	STX1A	Q16623	-0.421219	0.152729	0.00870478	0.543838	0.542158	0.545519	0.201581	0.154882	0.304348	0.789816	0.788644	0.790988	0.569258
SL004338	FGF20	Q9NP95	-0.831194	0.185499	1.6187e-05	0.553349	0.551631	0.555068	-0.0878308	0.183551	0.718358	0.790137	0.788961	0.791314	0.515541
SL004347	IL22	Q9GZX6	0.721861	0.08811	1.21351e-15	0.600434	0.59889	0.601978	0.377228	0.0873508	0.000213013	0.793053	0.791895	0.794211	0.548774
SL004351	IL25	Q9H293	0.235005	0.134596	0.0939413	0.525209	0.523543	0.526876	0.223696	0.141653	0.210798	0.791064	0.789895	0.792234	0.490625
SL004352	IL17F	Q96PD4	1.0845	0.128348	1.4976e-16	0.609893	0.608272	0.611515	0.34062	0.154625	0.0733455	0.79075	0.789574	0.791927	0.567442
SL004354	IL19	Q9UHD0	-0.453977	0.232633	0.0620592	0.526898	0.525178	0.528618	-0.0266273	0.237398	0.933641	0.789338	0.788165	0.790511	0.700923
SL004355	CCL3L1	P16619	1.2855	0.147515	1.57306e-17	0.609807	0.608159	0.611455	0.375497	0.162559	0.0604494	0.791388	0.790219	0.792557	0.564383
SL004356	CCL4L1	Q8NHW4	0.248575	0.0968373	0.0144891	0.542285	0.540693	0.543877	0.151519	0.104058	0.248187	0.791296	0.790132	0.79246	0.235042
SL004357	MSTN	O14793	-1.74107	0.17605	3.67234e-22	0.624276	0.622634	0.625919	-0.829868	0.182481	8.21147e-05	0.793428	0.792252	0.794605	0.00058202
SL004359	NTF3	P20783	-0.441782	0.168654	0.0126565	0.537187	0.535519	0.538855	-0.0222053	0.159172	0.918686	0.790005	0.788834	0.791176	0.439901
SL004362	CLEC11A	Q9Y240	0.735909	0.124399	9.60266e-09	0.585957	0.584316	0.587598	0.48217	0.134023	0.0022971	0.792523	0.791361	0.793685	0.169127
SL004363	CLEC11A	Q9Y240	0.709299	0.116635	3.5752e-09	0.583911	0.582271	0.585551	0.491301	0.123303	0.000662735	0.792996	0.791836	0.794156	0.240727
SL004364	TNFRSF13B	O14836	0.48001	0.150306	0.00229866	0.549308	0.547663	0.550953	0.498734	0.165898	0.0127533	0.791416	0.790239	0.792593	0.409374
SL004396	STAT1	P42224	0.106439	0.0456882	0.0264442	0.53824	0.536615	0.539864	0.112731	0.0583137	0.119162	0.790678	0.789513	0.791844	0.327009
SL004400	F9	P00740	0.811309	0.243691	0.00147243	0.548554	0.546874	0.550234	0.121273	0.237329	0.705857	0.789652	0.788478	0.790827	0.640139
SL004458	PI3	P19957	1.59884	0.101898	7.60518e-54	0.690546	0.689075	0.692017	0.772657	0.113779	2.41891e-09	0.799719	0.798577	0.80086	0.114483
SL004466	SERPIND1	P05546	-0.869636	0.200533	3.06809e-05	0.561364	0.559688	0.563041	-0.143772	0.220614	0.624722	0.789655	0.788482	0.790828	0.28367
SL004486	VEGFC	P49767	0.199082	0.0808045	0.0188439	0.54942	0.547848	0.550993	0.29855	0.0995351	0.0128526	0.791928	0.790768	0.793088	0.219375
SL004492	TLR2	O60603	0.17396	0.174243	0.340033	0.519417	0.5177	0.521135	0.158824	0.174861	0.498499	0.790196	0.789011	0.791381	0.213426
SL004516	MBL2	P11226	0.568123	0.0961352	9.92055e-09	0.576671	0.575007	0.578336	0.375277	0.0989344	0.00125738	0.79212	0.790952	0.793287	0.463814
SL004556	CD55	P08174	2.01655	0.221332	4.96637e-19	0.61093	0.60928	0.612579	0.115926	0.258258	0.734798	0.789784	0.788612	0.790956	0.620623
SL004557	CD59	P13987	2.72988	0.180348	2.87494e-50	0.691591	0.69013	0.693053	1.15327	0.250117	6.37019e-05	0.794748	0.793577	0.795918	0.274447
SL004579	MRC1	P22897	1.9018	0.176848	5.69045e-26	0.632436	0.630867	0.634005	0.497343	0.205247	0.0483902	0.791459	0.790289	0.792629	0.521331
SL004580	MSR1	P21757	-0.137948	0.135707	0.331265	0.51436	0.51272	0.516	0.30651	0.144459	0.0850975	0.791055	0.789884	0.792227	0.371708
SL004594	TNNI2	P48788	0.415868	0.0729281	3.21694e-08	0.591758	0.590134	0.593382	0.125114	0.0861646	0.248323	0.791758	0.79059	0.792926	0.532849
SL004625	ADAMTS4	O75173	0.207444	0.154131	0.197444	0.522651	0.520974	0.524328	0.148362	0.162058	0.494767	0.790135	0.788953	0.791316	0.552915
SL004626	ADAMTS5	Q9UNA0	0.994299	0.113903	1.40154e-17	0.619859	0.618249	0.621468	0.107166	0.153156	0.604597	0.790505	0.78933	0.79168	0.557143
SL004635	TNFSF8	P32971	0.583573	0.165524	0.000753577	0.554462	0.552814	0.55611	0.0699033	0.17643	0.759629	0.789965	0.788788	0.791143	0.676386
SL004639	NTRK3	Q16288	-0.152091	0.220999	0.511768	0.512372	0.510685	0.51406	-0.630896	0.210084	0.0127939	0.792443	0.791272	0.793614	0.142216
SL004642	ADAM9	Q13443	0.0967104	0.0977916	0.34438	0.517157	0.515446	0.518868	0.0622424	0.101812	0.64265	0.78923	0.788052	0.790409	0.194823
SL004645	SPINT1	O43278	-0.634879	0.164075	0.000210713	0.550051	0.548352	0.55175	-0.120976	0.174366	0.604597	0.791546	0.790369	0.792724	0.537544
SL004646	LAYN	Q6UX15	1.87393	0.154572	1.03454e-32	0.656541	0.65499	0.658093	0.740475	0.201366	0.00180557	0.792942	0.79178	0.794104	0.155723
SL004650	FRZB	Q92765	1.2599	0.174776	2.16367e-12	0.583459	0.581793	0.585126	0.46964	0.188752	0.042222	0.791158	0.78999	0.792326	0.622994
SL004660	IBSP	P21815	0.736468	0.072323	2.02196e-23	0.629779	0.62822	0.631338	0.370298	0.0762315	2.27562e-05	0.796241	0.795087	0.797394	0.0866739
SL004661	ACAN	P16112	-0.00227385	0.156353	0.989917	0.495955	0.494293	0.497617	-0.327434	0.164353	0.107363	0.792033	0.790864	0.793201	0.744128
SL004670	ARTN	Q5T4W7	-0.280865	0.135189	0.0475334	0.535604	0.533908	0.5373	0.0333019	0.124384	0.84609	0.788773	0.787594	0.789952	0.599177
SL004671	TNFRSF13C	Q96RJ3	-0.773617	0.131198	1.0692e-08	0.590314	0.588653	0.591974	-0.206221	0.129671	0.207279	0.790873	0.789696	0.79205	0.608738
SL004672	TNFRSF17	Q02223	1.34394	0.167752	5.1963e-15	0.60389	0.60228	0.605501	0.498382	0.175049	0.0186502	0.791488	0.790319	0.792657	0.571557
SL004673	CTSS	P25774	1.08427	0.204085	2.777e-07	0.568882	0.567204	0.570559	0.543049	0.210383	0.0342714	0.790976	0.789811	0.792141	0.531153
SL004683	NOG	Q13253	-0.150388	0.106455	0.175544	0.512726	0.511041	0.514411	0.188681	0.114216	0.192067	0.7906	0.78943	0.79177	0.0614301
SL004686	TNFSF15	O95150	1.76372	0.141179	1.26635e-34	0.656175	0.654598	0.657752	0.650372	0.155645	0.000353654	0.792969	0.791799	0.794139	0.511924
SL004689	WISP1	O95388	-0.851643	0.138855	2.63028e-09	0.582477	0.580841	0.584113	0.166735	0.151052	0.390541	0.790298	0.78913	0.791466	0.601925
SL004690	WISP3	O95389	0.260873	0.121829	0.0412463	0.533018	0.531307	0.53473	0.0594813	0.130438	0.732807	0.791318	0.790145	0.79249	0.507098
SL004712	CXCL12	P48061	1.17567	0.148414	1.03877e-14	0.607589	0.605985	0.609193	0.751946	0.165073	8.11073e-05	0.794733	0.793579	0.795888	0.474722
SL004720	PPP3R1	P63098	-0.457897	0.16508	0.00834966	0.547116	0.545438	0.548794	0.306264	0.171681	0.156825	0.790588	0.789411	0.791766	0.629189
SL004724	KAT6A	Q92794	0.345995	0.148646	0.0265338	0.537386	0.535761	0.539011	0.236186	0.162806	0.248323	0.790798	0.789628	0.791968	0.630433
SL004726	CD97	P48960	0.764592	0.219639	0.000880865	0.544705	0.543028	0.546383	0.208049	0.226485	0.494187	0.790574	0.789405	0.791743	0.569548
SL004733	LRP1	Q07954	0.409061	0.142977	0.0065608	0.558517	0.556835	0.560199	0.127269	0.153233	0.539358	0.790255	0.789088	0.791422	0.54872
SL004739	ITIH4	Q14624	0.313863	0.0636342	1.93796e-06	0.566493	0.564881	0.568105	0.163447	0.0672491	0.0476529	0.791605	0.790437	0.792773	0.330334
SL004742	AFM	P43652	-1.50579	0.201835	3.46367e-13	0.598292	0.596654	0.599931	-0.863278	0.214044	0.000587258	0.793656	0.792488	0.794823	0.0218321
SL004759	EIF5	P55010	0.127299	0.0669921	0.0689508	0.529928	0.528317	0.531538	0.17481	0.0762613	0.062233	0.791781	0.790619	0.792944	0.203072
SL004760	PAFAH1B2	P68402	0.109546	0.0599843	0.079831	0.543047	0.541487	0.544608	0.176172	0.0774241	0.063987	0.790983	0.789819	0.792148	0.355719
SL004783	S100A12	P80511	0.580395	0.107547	1.77513e-07	0.57794	0.576314	0.579567	0.414543	0.112205	0.00170746	0.792177	0.791008	0.793346	0.336107
SL004804	CADM3	Q8N126	0.365793	0.165444	0.0351328	0.534599	0.532901	0.536297	0.078633	0.178069	0.735629	0.790756	0.789582	0.79193	0.486101
SL004805	CADM1	Q9BY67	0.914413	0.228833	0.000127868	0.550381	0.548715	0.552046	0.0383333	0.23494	0.905151	0.790044	0.788864	0.791225	0.582102
SL004820	PGAM1	P18669	-0.172268	0.0364286	5.22959e-06	0.561217	0.559561	0.562872	-0.0357414	0.0390661	0.494767	0.790133	0.788966	0.791301	0.60885
SL004829	S100A7	P31151	0.148091	0.0774104	0.067073	0.531905	0.530232	0.533578	-0.0575674	0.0801841	0.59649	0.789686	0.788511	0.790861	0.215812
SL004837	INHBA INHBB	P08476 P09529	0.733323	0.123848	9.33197e-09	0.598449	0.596826	0.600073	0.146112	0.145717	0.439565	0.79022	0.789046	0.791394	0.0772555
SL004843	EFNA2	O43921	2.51541	0.196651	2.98752e-36	0.656815	0.655233	0.658397	0.991216	0.238081	0.000371182	0.793767	0.792607	0.794926	0.642184
SL004844	EPHA5	P54756	0.385976	0.147272	0.0126549	0.537831	0.536141	0.539521	-0.12864	0.156181	0.541577	0.789969	0.788793	0.791145	0.583661
SL004845	EPHB4	P54760	-0.332445	0.152506	0.0376523	0.537886	0.536222	0.539549	0.340109	0.172855	0.113382	0.792126	0.790954	0.793297	0.654694
SL004852	CD274	Q9NZQ7	0.207116	0.0855946	0.0211091	0.547706	0.54608	0.549331	0.0601214	0.0923552	0.624722	0.78937	0.788186	0.790554	0.590422
SL004858	GFRA1	P56159	0.890009	0.131346	4.23191e-11	0.584759	0.583156	0.586362	0.146646	0.131978	0.387271	0.789797	0.788625	0.79097	0.553557
SL004859	TNFRSF18	Q9Y5U5	0.0281759	0.122208	0.827832	0.50574	0.504041	0.507438	-0.105165	0.126058	0.539358	0.788314	0.787121	0.789506	0.626522
SL004862	PDCD1LG2	Q9BQ51	0.341277	0.167734	0.0520403	0.530019	0.528346	0.531693	0.153479	0.181908	0.536439	0.789985	0.788805	0.791164	0.266581
SL004863	TNFRSF19	Q9NS68	1.06818	0.103732	6.53373e-24	0.658117	0.656573	0.659661	0.404387	0.133824	0.0123931	0.792753	0.791578	0.793928	0.0120542
SL004865	CDH6	P55285	-1.15467	0.173064	8.56105e-11	0.59282	0.591136	0.594505	0.00335939	0.182341	0.989162	0.792059	0.790888	0.79323	0.686687
SL004867	CA3	P07451	0.748544	0.0756911	3.67234e-22	0.63481	0.633256	0.636363	0.0978227	0.095863	0.432586	0.789759	0.788584	0.790933	0.255244
SL004869	CA13	Q8N1Q1	-0.0988532	0.0400918	0.0187825	0.532487	0.530853	0.534121	-0.0220099	0.0453063	0.718358	0.79022	0.789053	0.791386	0.652009
SL004871	TNFRSF21	O75509	2.15462	0.219297	6.80158e-22	0.624442	0.622866	0.626019	0.539639	0.23988	0.0666605	0.792037	0.790872	0.793201	0.707953
SL004876	SERPINA4	P29622	-1.70937	0.273601	1.30384e-09	0.585068	0.583401	0.586736	-0.933348	0.278706	0.00471646	0.79187	0.790704	0.793036	0.0053781
SL004891	HNRNPA2B1	P22626	0.218743	0.0842244	0.0133907	0.548647	0.547045	0.550249	0.313324	0.103878	0.0125258	0.791132	0.789964	0.792299	0.232893
SL004899	HSPA8	P11142	0.17392	0.106705	0.116955	0.522687	0.521049	0.524324	0.182951	0.123549	0.241362	0.789797	0.788623	0.790972	0.653865
SL004908	TPM2	P07951	0.686123	0.173633	0.000152706	0.550476	0.548764	0.552188	0.228903	0.18108	0.318842	0.789728	0.788545	0.790911	0.580453
SL004915	CLIC1	O00299	-0.0956661	0.0420668	0.0302531	0.53078	0.529147	0.532412	0.0357018	0.0513663	0.604597	0.790336	0.789171	0.7915	0.505077
SL004921	NME2	P22392	-0.090011	0.0445293	0.0535155	0.525042	0.523413	0.526672	0.0303595	0.0524526	0.662448	0.790506	0.789342	0.791669	0.424149
SL004924	EIF4H	Q15056	-0.105865	0.0432045	0.0194387	0.532447	0.530812	0.534082	0.00833973	0.0466202	0.89659	0.790163	0.788994	0.791333	0.550581
SL004939	PTPN1	P18031	0.112752	0.119974	0.369452	0.516469	0.514787	0.518151	0.0185204	0.120692	0.911652	0.790445	0.789266	0.791625	0.620657
SL004940	PTPN6	P29350	0.0587827	0.0465728	0.22636	0.520604	0.518972	0.522237	0.0855304	0.0572422	0.235839	0.790176	0.78901	0.791343	0.366987
SL005059	TGFBR3	Q03167	1.86903	0.239475	2.55757e-14	0.593374	0.591762	0.594987	0.163494	0.259109	0.633773	0.789804	0.788635	0.790974	0.377706
SL005084	POSTN	Q15063	2.3683	0.177858	3.93965e-39	0.668651	0.667183	0.670118	0.505437	0.205291	0.0449542	0.79158	0.790423	0.792737	0.514382
SL005087	IGFBP7	Q16270	1.43605	0.23807	4.81225e-09	0.56723	0.565535	0.568926	0.600033	0.260317	0.0609694	0.790565	0.789404	0.791725	0.271575
SL005102	SHBG	P04278	0.543876	0.0965989	4.84067e-08	0.580426	0.578801	0.58205	0.322331	0.117494	0.023424	0.790701	0.789539	0.791864	0.588021
SL005115	SPON1	Q9HCB6	2.31536	0.164977	2.31494e-43	0.673203	0.671737	0.674668	1.09115	0.200237	1.73273e-06	0.797972	0.796846	0.799097	0.485272
SL005152	RARRES2	Q99969	0.663998	0.117612	4.44491e-08	0.590851	0.589197	0.592504	0.423748	0.134705	0.00876761	0.791199	0.790011	0.792387	0.194538
SL005153	CNTFR	P26992	1.08748	0.253659	3.79994e-05	0.54334	0.541674	0.545007	-0.0206272	0.261741	0.953293	0.790512	0.789343	0.791681	0.399505
SL005155	TDGF1	P13385	0.0309761	0.0500932	0.554209	0.521441	0.519789	0.523094	-0.0216428	0.0482168	0.734798	0.79002	0.788855	0.791185	0.0820189
SL005156	NBL1	P41271	1.34165	0.0898074	5.18349e-49	0.675154	0.673608	0.676701	0.442667	0.108629	0.000525427	0.792762	0.791591	0.793933	0.48606
SL005158	CLEC4M	Q9H2X3	0.857826	0.300989	0.00677593	0.535133	0.53347	0.536795	0.0769055	0.318135	0.858687	0.790254	0.789079	0.791428	0.612581
SL005160	ESAM	Q96AP7	0.334692	0.0973842	0.00101369	0.568393	0.56681	0.569976	0.332365	0.124798	0.0284657	0.790711	0.789542	0.791879	0.357128
SL005166	LGALS7	P47929	0.171601	0.110606	0.136521	0.530444	0.528817	0.532072	0.261552	0.133351	0.114456	0.79068	0.789511	0.791849	0.36648
SL005168	GHR	P10912	-1.43138	0.126147	9.0921e-29	0.642892	0.641308	0.644477	-0.651629	0.147934	0.000146618	0.796906	0.795759	0.798053	0.26697
SL005169	ICAM5	Q9UMF0	0.869678	0.171098	9.09695e-07	0.568633	0.566979	0.570287	0.620396	0.175329	0.00267345	0.794161	0.793008	0.795315	0.309001
SL005171	IGFBP4	P22692	1.16417	0.202461	2.47067e-08	0.572032	0.570386	0.573678	0.76688	0.22581	0.00414563	0.792199	0.791029	0.793369	0.391787
SL005172	IGFBP6	P24592	1.81355	0.148727	4.64642e-33	0.646867	0.645314	0.648421	0.420065	0.183477	0.0624176	0.791317	0.790141	0.792494	0.649796
SL005173	IL10RA	Q13651	0.777897	0.245247	0.00245259	0.538446	0.536766	0.540127	0.158636	0.261436	0.645064	0.789504	0.788333	0.790676	0.674321
SL005177	IL36A	Q9UHA7	0.214482	0.0753574	0.00680921	0.539242	0.537596	0.540889	0.0616468	0.077115	0.548613	0.790095	0.78893	0.791261	0.61231
SL005183	IL22RA2	Q969J5	-1.19663	0.137033	1.37558e-17	0.610173	0.608535	0.611811	-0.361612	0.142403	0.0380506	0.790756	0.789571	0.791942	0.74363
SL005184	IL12B IL23A	P29460, Q9NPF7	0.588914	0.102775	2.76813e-08	0.581408	0.579773	0.583043	0.084914	0.110772	0.565911	0.790013	0.788846	0.791181	0.470472
SL005185	IL23R	Q5VWK5	-0.232772	0.100383	0.0270526	0.52865	0.526984	0.530315	-0.0728041	0.103765	0.604567	0.789892	0.788723	0.79106	0.534531
SL005188	IL5RA	Q01344	0.6112	0.111777	1.19931e-07	0.570006	0.568339	0.571673	0.135307	0.11576	0.362022	0.790117	0.788947	0.791287	0.528373
SL005190	LILRB1	Q8NHL6	0.27444	0.162721	0.106017	0.528961	0.527346	0.530576	-0.201129	0.160597	0.32309	0.789745	0.788579	0.790911	0.307442
SL005191	LILRB2	Q8N423	1.2431	0.176379	6.68161e-12	0.596815	0.595213	0.598418	0.33132	0.189471	0.163462	0.789036	0.787857	0.790215	0.649159
SL005193	JAM2	P57087	1.20796	0.15363	1.64141e-14	0.614521	0.612931	0.61611	0.511418	0.186588	0.0234633	0.792202	0.791032	0.793371	0.397117
SL005194	JAM3	Q9BX67	0.13651	0.0633885	0.0400792	0.552171	0.550605	0.553737	0.185121	0.0819799	0.0660319	0.790889	0.789723	0.792055	0.249989
SL005195	LAG3	P18627	0.666679	0.108542	2.51233e-09	0.575663	0.574045	0.577282	0.0572358	0.119532	0.718358	0.789957	0.788787	0.791126	0.567066
SL005196	LSAMP	Q13449	1.23706	0.225039	1.02588e-07	0.575618	0.574026	0.577209	0.557904	0.258078	0.0788305	0.792142	0.790981	0.793303	0.505212
SL005199	MICA	Q29983	0.0524546	0.0664757	0.452298	0.51413	0.512497	0.515764	-0.0163862	0.0655178	0.855045	0.790821	0.789656	0.791985	0.555532
SL005200	MICB	Q29980	0.287941	0.101349	0.00690331	0.549555	0.547896	0.551214	0.0236873	0.107779	0.871565	0.788832	0.787647	0.790017	0.288337
SL005201	AMH	P03971	1.60258	0.342678	6.66129e-06	0.557903	0.556244	0.559562	0.0977942	0.384113	0.853171	0.79017	0.788999	0.79134	0.543856
SL005202	MST1	P26927	0.134463	0.0515305	0.0129773	0.540102	0.538465	0.541738	0.0951195	0.05199	0.144149	0.790679	0.789515	0.791843	0.508871
SL005205	NCR3	O14931	0.416879	0.146381	0.0067942	0.541552	0.539875	0.54323	0.21145	0.157371	0.286415	0.790865	0.78969	0.79204	0.469578
SL005207	NCR1	O76036	1.13857	0.145886	2.55757e-14	0.60204	0.600371	0.603709	0.544042	0.166053	0.00599641	0.791612	0.79042	0.792804	0.44496
SL005208	RTN4R	Q9BZR6	0.52238	0.167144	0.00285487	0.534708	0.533082	0.536334	-0.121963	0.17112	0.599386	0.78997	0.788804	0.791137	0.651558
SL005209	NOTCH3	Q9UM47	1.69364	0.194857	1.90486e-17	0.607215	0.605604	0.608825	0.109433	0.239169	0.732807	0.790192	0.789025	0.791359	0.513998
SL005210	NRCAM	Q92823	0.196562	0.174285	0.280509	0.504152	0.502451	0.505852	-0.210533	0.180465	0.362546	0.788377	0.787194	0.78956	0.608298
SL005212	PRLR	P16471	0.392713	0.113428	0.00093511	0.552365	0.550713	0.554018	0.141246	0.12126	0.362793	0.790363	0.789188	0.791537	0.604545
SL005213	RELT	Q969Z4	2.34284	0.155032	3.99179e-50	0.681311	0.679836	0.682785	0.956807	0.183799	5.05802e-06	0.795373	0.794208	0.796537	0.126966
SL005214	SEMA6A	Q9H2E6	0.869453	0.307574	0.00718455	0.535579	0.533889	0.53727	0.0798838	0.277275	0.83344	0.790085	0.788907	0.791262	0.659916
SL005215	CD33	P20138	0.469897	0.125824	0.000354827	0.553475	0.55183	0.555121	0.103354	0.120683	0.531342	0.79033	0.789157	0.791503	0.63836
SL005218	SIGLEC7	Q9Y286	0.938439	0.194618	3.30534e-06	0.561894	0.560258	0.56353	0.346918	0.21387	0.198294	0.789474	0.788302	0.790646	0.395783
SL005221	SCARF1	Q14162	0.656943	0.108855	4.74562e-09	0.595935	0.594354	0.597516	0.563265	0.135956	0.000398526	0.793022	0.79186	0.794184	0.171647
SL005222	SCARF2	Q96GP6	0.205528	0.0810066	0.0156116	0.533891	0.532228	0.535555	0.239768	0.0831106	0.0173265	0.791375	0.790209	0.79254	0.148808
SL005223	IL27RA	Q6UWB1	0.546229	0.168979	0.00201822	0.53996	0.538321	0.541598	0.180619	0.169933	0.410922	0.788852	0.787674	0.79003	0.591838
SL005225	NTRK1	P04629	-0.0763305	0.097329	0.454537	0.505315	0.503686	0.506945	0.157578	0.10221	0.221659	0.79134	0.790171	0.792509	0.539831
SL005230	UNC5C	O95185	2.41848	0.162338	9.23788e-49	0.680226	0.67875	0.681702	0.969083	0.205747	4.35699e-05	0.794649	0.793503	0.795794	0.536199
SL005231	UNC5D	Q6UXZ4	1.03735	0.174086	7.44928e-09	0.571886	0.57027	0.573502	0.0270671	0.188327	0.916697	0.789988	0.788812	0.791165	0.599378
SL005233	EDA2R	Q9HAV5	0.690766	0.108719	6.77562e-10	0.612805	0.611211	0.6144	0.354274	0.125347	0.0197751	0.791698	0.790522	0.792874	0.287047
SL005263	LRPAP1	P30533	0.157845	0.0960243	0.114457	0.528937	0.527285	0.530588	0.0879124	0.105977	0.539358	0.790458	0.789291	0.791625	0.386473
SL005352	FABP5	Q01469	0.512229	0.124858	8.212e-05	0.553251	0.551624	0.554877	0.481892	0.127987	0.00133766	0.792698	0.791535	0.793861	0.41918
SL005357	REG1A	P05451	1.18111	0.0930717	1.06312e-35	0.66281	0.661316	0.664303	0.519198	0.104421	1.48615e-05	0.795562	0.794388	0.796735	0.0575269
SL005361	APOD	P05090	0.584071	0.169824	0.00100992	0.543076	0.541373	0.544779	0.173413	0.170877	0.433325	0.790714	0.789535	0.791894	0.641729
SL005403	LMAN2	Q12907	-1.35932	0.181486	2.78595e-13	0.605066	0.6034	0.606732	0.125015	0.182638	0.609385	0.789441	0.788264	0.790619	0.580843
SL005430	SECTM1	Q8WVN6	1.83961	0.171204	6.16111e-26	0.639606	0.63797	0.641242	0.962707	0.197323	2.10524e-05	0.795239	0.794077	0.7964	0.0997396
SL005488	SPARCL1	Q14515	0.120794	0.156272	0.460772	0.503034	0.501402	0.504667	-0.267824	0.162605	0.192862	0.790331	0.789154	0.791508	0.0784726
SL005491	OPCML	Q14982	-0.659204	0.167934	0.00016878	0.565518	0.563855	0.567181	0.254746	0.181996	0.266194	0.791105	0.789933	0.792276	0.66431
SL005572	GSN	P06396	-0.0263569	0.224592	0.913596	0.505644	0.503958	0.50733	-0.85476	0.242866	0.00281496	0.792599	0.791434	0.793764	0.0271639
SL005574	ACY1	Q03154	-0.22783	0.091043	0.0171204	0.538283	0.536611	0.539956	0.0620875	0.0981735	0.633773	0.790432	0.789258	0.791605	0.627085
SL005629	NAGK	Q9UJ70	0.191622	0.0983648	0.062436	0.532556	0.530888	0.534225	0.0370539	0.119187	0.817411	0.789392	0.788219	0.790564	0.50141
SL005699	APOL1	O14791	-1.04659	0.13582	5.42858e-14	0.603244	0.601658	0.604829	-0.231897	0.152824	0.229738	0.791062	0.789893	0.792231	0.634653
SL005764	CD163	Q86VB7	0.843609	0.1246	4.37317e-11	0.585522	0.58395	0.587093	0.0715917	0.144764	0.715436	0.790194	0.789028	0.791361	0.642039
SL005789	STC1	P52823	1.71461	0.152253	2.27883e-28	0.645999	0.644451	0.647547	0.693064	0.179794	0.001033	0.79158	0.790419	0.792741	0.213265
SL005797	PIGR	P01833	-0.446959	0.129985	0.00100994	0.54079	0.539104	0.542476	0.271338	0.138919	0.115622	0.791674	0.790511	0.792837	0.583094
SL005846	MSN	P26038	0.0593979	0.133347	0.673592	0.501003	0.499326	0.502679	0.0895029	0.137576	0.624722	0.791717	0.790544	0.792889	0.498077
SL006029	CHIT1	Q13231	0.613458	0.0746102	9.63745e-16	0.617231	0.615613	0.61885	-0.00623232	0.07615	0.952326	0.789781	0.788612	0.790951	0.606187
SL006114	ROR1	Q01973	2.04413	0.184094	1.26335e-27	0.635361	0.633784	0.636939	0.559243	0.222901	0.0406355	0.791728	0.790563	0.792893	0.561083
SL006119	TFF3	Q07654	1.35409	0.0887057	4.25943e-51	0.712571	0.711143	0.713999	1.11286	0.148214	1.94789e-11	0.800036	0.798876	0.801196	0.0266166
SL006131	FABP1	P07148	0.515809	0.12526	7.75359e-05	0.563829	0.562158	0.5655	0.283171	0.139111	0.100395	0.790691	0.789523	0.791859	0.601965
SL006230	LUM	P51884	1.72291	0.208914	8.0124e-16	0.601454	0.599786	0.603121	-0.147935	0.245523	0.647237	0.78945	0.788275	0.790625	0.387221
SL006397	NRP1	O14786	0.731617	0.208892	0.000818014	0.549448	0.547789	0.551107	0.317842	0.222748	0.256652	0.790528	0.789363	0.791692	0.564333
SL006406	PLXNC1	O60486	0.171615	0.224862	0.466105	0.506971	0.505287	0.508654	-0.171131	0.229557	0.578641	0.789309	0.788134	0.790484	0.581566
SL006460	GP1BA	P07359	0.466549	0.173078	0.0103252	0.541122	0.539414	0.542831	0.330786	0.186784	0.158466	0.792201	0.791039	0.793364	0.406569
SL006522	LGALS3BP	Q08380	0.283427	0.122038	0.026849	0.531044	0.529394	0.532694	0.171779	0.122939	0.266194	0.790864	0.789699	0.79203	0.614819
SL006527	EFEMP1	Q12805	1.91233	0.140301	5.74686e-41	0.677957	0.676504	0.67941	0.634216	0.187107	0.00418052	0.79284	0.79168	0.794001	0.629746
SL006544	TGFBI	Q15582	1.61302	0.194499	5.47846e-16	0.59436	0.59273	0.595989	0.112233	0.247879	0.734165	0.789787	0.788617	0.790957	0.36959
SL006550	ECM1	Q16610	-1.1418	0.220321	5.40067e-07	0.579966	0.578343	0.581589	-0.360558	0.223183	0.199811	0.790523	0.789352	0.791694	0.0159251
SL006610	ADAMTS13	Q76LX8	-1.84274	0.163409	1.95003e-28	0.643332	0.641781	0.644882	-0.583363	0.169977	0.0036794	0.792135	0.790957	0.793313	0.223655
SL006675	CKAP2	Q8WWK9	0.296263	0.161174	0.0780246	0.526746	0.525085	0.528408	0.00990223	0.179112	0.967804	0.790208	0.789033	0.791383	0.621458
SL006694	CNDP1	Q96KN2	-0.402811	0.0643147	1.19167e-09	0.587844	0.586233	0.589454	-0.0503361	0.0714335	0.60453	0.790449	0.789284	0.791614	0.55875
SL006705	PFDN5	Q99471	0.243146	0.119197	0.0515857	0.538672	0.536995	0.540349	0.16633	0.129419	0.311729	0.789978	0.788808	0.791149	0.441954
SL006713	COLEC11	Q9BWP8	0.292526	0.123037	0.0234418	0.524619	0.522952	0.526287	0.0489105	0.126783	0.764225	0.789496	0.788327	0.790665	0.624405
SL006777	FETUB	Q9UGM5	-0.451568	0.161908	0.00804095	0.540236	0.538578	0.541893	0.216903	0.189513	0.373445	0.789491	0.788323	0.790658	0.176446
SL006830	CFHR5	Q9BXR6	0.497717	0.151836	0.00175415	0.537959	0.536218	0.5397	0.300451	0.156131	0.120199	0.791497	0.790324	0.792669	0.607929
SL006910	CTSV	O60911	-1.64262	0.132825	5.9853e-34	0.646788	0.645171	0.648406	-0.459834	0.159407	0.0173265	0.792039	0.790866	0.793213	0.285873
SL006915	IL27 EBI3	Q8NEV9 Q14213	0.363215	0.147239	0.0187605	0.545042	0.543354	0.546731	0.238227	0.157888	0.231717	0.789885	0.788706	0.791065	0.575504
SL006917	LYN	P07948	-0.102236	0.041723	0.0194387	0.530511	0.528874	0.532148	0.00978453	0.0470815	0.878554	0.790184	0.78902	0.791349	0.411087
SL006922	RAD51	Q06609	0.582602	0.209341	0.0081723	0.529391	0.527701	0.531082	0.144201	0.208177	0.604597	0.789883	0.788706	0.79106	0.543
SL006970	DLL1	O00548	1.53574	0.143347	8.55794e-26	0.64513	0.643593	0.646667	0.525295	0.181969	0.0173265	0.79207	0.790902	0.793237	0.411718
SL006998	PDPK1	O15530	-0.132418	0.0549805	0.021727	0.534963	0.533312	0.536613	0.0398435	0.0629596	0.633773	0.790247	0.789082	0.791411	0.539008
SL007022	SYNCRIP	O60506	0.30177	0.137241	0.0360243	0.53386	0.532176	0.535544	0.131968	0.155575	0.534133	0.789956	0.788788	0.791124	0.641046
SL007025	JAK2	O60674	0.296322	0.0642183	8.9472e-06	0.548638	0.54701	0.550266	0.151586	0.0673805	0.0666605	0.791826	0.790662	0.79299	0.199836
SL007033	LTBP4	Q8N2S1	2.37414	0.164089	4.78965e-46	0.687283	0.685806	0.68876	1.04053	0.223476	5.52068e-05	0.795299	0.794154	0.796443	0.419612
SL007056	BMP10	O95393	0.635337	0.152068	6.02095e-05	0.555546	0.553878	0.557213	0.334041	0.162945	0.0980438	0.790592	0.789427	0.791758	0.673905
SL007100	LTA4H	P09960	0.823223	0.109525	2.29263e-13	0.600192	0.598569	0.601815	0.0856858	0.113362	0.571828	0.790334	0.789163	0.791506	0.596062
SL007151	GPD1	P21695	-0.642082	0.122813	4.25499e-07	0.57318	0.571482	0.574878	-0.222166	0.128886	0.169885	0.790382	0.789209	0.791556	0.410253
SL007153	LPO	P22079	-0.0162013	0.117429	0.898548	0.498815	0.497182	0.500448	0.164861	0.111841	0.243195	0.790014	0.788846	0.791183	0.657133
SL007173	GRN	P28799	1.16363	0.214369	1.49459e-07	0.576679	0.575034	0.578325	0.482721	0.239285	0.103353	0.79085	0.789685	0.792015	0.357488
SL007179	EPHB2	P29323	1.90526	0.189196	6.241e-23	0.628799	0.627234	0.630365	0.599388	0.23539	0.0374938	0.792271	0.791106	0.793436	0.558741
SL007181	TYK2	P29597	0.415902	0.110586	0.000321366	0.552576	0.550966	0.554186	0.450234	0.125959	0.00241866	0.792658	0.791486	0.793831	0.246055
SL007206	THBS2	P35442	1.30261	0.105819	1.16111e-33	0.653246	0.651693	0.654799	0.744474	0.12526	1.51443e-07	0.798548	0.797415	0.79968	0.149836
SL007207	THBS4	P35443	1.48558	0.160144	1.14001e-19	0.612785	0.611153	0.614418	0.253301	0.174395	0.248323	0.791218	0.790051	0.792385	0.473232
SL007237	MAP2K4	P45985	0.159561	0.144571	0.291203	0.510055	0.508395	0.511715	-0.332258	0.152738	0.0770889	0.790859	0.789697	0.792021	0.379755
SL007261	METAP2	P50579	-0.10789	0.0529442	0.0517425	0.526427	0.524801	0.528053	0.0827832	0.0648967	0.315951	0.790365	0.7892	0.79153	0.495146
SL007274	EFNB2	P52799	2.23791	0.21484	1.93652e-24	0.63282	0.631221	0.63442	0.568351	0.215036	0.0298737	0.792212	0.791038	0.793386	0.420442
SL007306	FAM3B	P58499	0.937882	0.161527	1.79181e-08	0.580841	0.579208	0.582474	0.35489	0.169581	0.0907202	0.791498	0.790334	0.792661	0.448445
SL007310	RAC3	P60763	-0.114422	0.050456	0.0306394	0.52826	0.526648	0.529872	0.0672809	0.0610658	0.390541	0.790257	0.789092	0.791422	0.468625
SL007327	OLR1	P78380	0.61266	0.101689	5.00912e-09	0.579343	0.577751	0.580936	0.43803	0.112255	0.000908569	0.792149	0.790992	0.793305	0.668574
SL007328	JAG1	P78504	1.85584	0.219608	1.49631e-16	0.606737	0.605117	0.608357	0.622392	0.255764	0.0474921	0.791226	0.790071	0.792381	0.359109
SL007336	SET	Q01105	-0.505625	0.158576	0.00233304	0.550191	0.548503	0.551878	0.0833541	0.153781	0.685762	0.790002	0.788828	0.791176	0.619967
SL007429	GPNMB	Q14956	1.35064	0.184879	1.06382e-12	0.599665	0.598063	0.601268	0.428241	0.193147	0.070999	0.791645	0.790481	0.792808	0.564324
SL007453	MAPK11	Q15759	0.365811	0.12447	0.00514109	0.542472	0.540807	0.544136	0.0337596	0.132873	0.853171	0.789905	0.788723	0.791087	0.457707
SL007471	COLEC12	Q5KU26	-0.315654	0.157454	0.0554725	0.527183	0.52553	0.528836	-0.00548655	0.16616	0.981195	0.790093	0.788917	0.791269	0.703291
SL007502	CHST15	Q7LFX5	2.36555	0.253095	6.08188e-20	0.616973	0.615378	0.618569	1.06388	0.291677	0.00195962	0.7946	0.793452	0.795748	0.357458
SL007547	HAVCR2	Q8TDQ0	2.00624	0.145743	9.21288e-42	0.675372	0.673878	0.676866	0.621992	0.172557	0.0022617	0.795009	0.793856	0.796161	0.45234
SL007631	SOST	Q9BQB4	0.785938	0.0994142	1.17201e-14	0.596673	0.595041	0.598305	-0.085431	0.130797	0.624722	0.789954	0.788786	0.791122	0.599809
SL007642	ANGPTL4	Q9BY76	0.481771	0.126359	0.000263174	0.558671	0.557062	0.56028	0.583022	0.144498	0.000587258	0.793732	0.792573	0.794891	0.151722
SL007651	FGF23	Q9GZV9	0.333261	0.111007	0.00421884	0.530554	0.528826	0.532282	0.182361	0.104971	0.166994	0.789046	0.787868	0.790224	0.461442
SL007673	NTN4	Q9HB63	-0.149537	0.176945	0.421353	0.509797	0.508133	0.511462	0.448562	0.166771	0.0264543	0.791252	0.79009	0.792415	0.616154
SL007674	LY9	Q9HBG7	0.794272	0.160036	1.66055e-06	0.568774	0.567092	0.570455	0.242937	0.156857	0.220824	0.790783	0.789601	0.791966	0.683791
SL007696	CD93	Q9NPY3	1.19118	0.221196	1.88475e-07	0.568469	0.566781	0.570156	0.283074	0.224804	0.320048	0.790147	0.788981	0.791313	0.676675
SL007756	GDF2	Q9UK05	-0.426063	0.0928127	9.95751e-06	0.566575	0.564991	0.568159	-0.27124	0.0984732	0.0227812	0.793097	0.791932	0.794262	0.110722
SL007804	BGN	P21810	0.642708	0.150262	3.94834e-05	0.562458	0.560732	0.564183	0.190796	0.14983	0.315951	0.790922	0.789743	0.792102	0.716601
SL007871	CMPK1	P30085	-0.177655	0.151101	0.259641	0.519471	0.51782	0.521122	0.285513	0.156648	0.145905	0.789899	0.788722	0.791076	0.530491
SL008039	AKR1A1	P14550	0.0871029	0.0726417	0.250508	0.527941	0.526336	0.529546	0.128612	0.0926447	0.27	0.790624	0.789459	0.79179	0.403663
SL008094	PGM1	P36871	0.0848296	0.107074	0.451077	0.511209	0.509554	0.512865	0.0946824	0.115819	0.54188	0.788673	0.787493	0.789854	0.428068
SL008099	CAPG	P40121	1.65708	0.108146	1.84981e-51	0.695921	0.694448	0.697394	0.590145	0.140705	0.000342832	0.793144	0.791974	0.794314	0.303179
SL008122	DUSP3	P51452	-0.151466	0.0502339	0.00405759	0.540869	0.539222	0.542516	0.0320052	0.0566103	0.670739	0.790201	0.789036	0.791365	0.517799
SL008158	HIST1H3A	P68431	0.67421	0.0943238	3.29866e-12	0.594106	0.592463	0.595749	0.27255	0.110481	0.0445786	0.790414	0.789237	0.791592	0.0535295
SL008176	PSME1	Q06323	0.0495196	0.0773398	0.541104	0.517158	0.515552	0.518763	0.0958411	0.0927147	0.427287	0.790328	0.789162	0.791494	0.347797
SL008177	C1QBP	Q07021	0.405528	0.226824	0.0862539	0.528304	0.526637	0.529972	0.326572	0.266253	0.336186	0.790564	0.789393	0.791735	0.528161
SL008178	DPT	Q07507	1.34677	0.144535	7.88017e-20	0.617655	0.616046	0.619264	0.159564	0.192164	0.539358	0.789628	0.788457	0.7908	0.571794
SL008193	NID2	Q14112	0.401576	0.117689	0.00110697	0.552342	0.550752	0.553931	0.37813	0.131255	0.0173265	0.791514	0.790357	0.79267	0.235548
SL008360	FLRT2	O43155	3.1224	0.243395	1.89463e-36	0.656434	0.654852	0.658015	1.09275	0.261407	0.000353654	0.795014	0.793864	0.796164	0.626492
SL008372	FLRT3	Q9NZU0	0.741555	0.177261	5.89726e-05	0.548136	0.546447	0.549826	0.31811	0.176836	0.152256	0.791288	0.790116	0.79246	0.459967
SL008380	CTSZ	Q9UBR2	1.48075	0.161775	3.39674e-19	0.61511	0.613533	0.616688	0.406967	0.187767	0.0783385	0.791076	0.789911	0.79224	0.58796
SL008381	CTSF	Q9UBX1	0.677736	0.184895	0.000459112	0.538606	0.536931	0.540281	-0.299879	0.197902	0.230064	0.791881	0.790716	0.793046	0.277378
SL008382	CST5	P28325	0.712187	0.0869578	1.232e-15	0.607941	0.606282	0.609601	-0.121902	0.0980389	0.327368	0.789683	0.788509	0.790857	0.669018
SL008414	EPHB6	O15197	1.82745	0.196769	1.04057e-19	0.614946	0.613327	0.616565	0.530486	0.223594	0.0534909	0.791738	0.790569	0.792907	0.444768
SL008416	MRC2	Q9UBG0	0.425064	0.213273	0.0567087	0.521996	0.52032	0.523671	-0.00388195	0.223194	0.989162	0.789379	0.788205	0.790553	0.384682
SL008486	LGALS9	O00182	0.95715	0.122785	2.73337e-14	0.629766	0.628187	0.631346	0.183266	0.153186	0.349982	0.79044	0.789264	0.791616	0.298088
SL008516	CST2	P09228	0.656513	0.106513	2.20309e-09	0.583821	0.582163	0.585479	-0.0967464	0.101149	0.468327	0.789581	0.788411	0.790752	0.388155
SL008574	OMD	Q99983	0.762149	0.121337	1.06649e-09	0.571876	0.570221	0.57353	0.106124	0.130009	0.54188	0.791367	0.790211	0.792523	0.637979
SL008588	CD84	Q9UIB8	0.239794	0.104636	0.0289489	0.542741	0.541111	0.544371	0.162185	0.124088	0.302126	0.790614	0.789443	0.791785	0.469316
SL008591	TFF1	P04155	0.167223	0.0665683	0.0167323	0.540632	0.538981	0.542282	-0.0421976	0.0687973	0.642237	0.789994	0.788825	0.791164	0.669792
SL008609	FCGR3B	O75015	1.00366	0.144064	1.1796e-11	0.588792	0.587179	0.590405	0.182716	0.154343	0.35636	0.79015	0.788983	0.791317	0.613937
SL008614	EFNB1	P98172	0.776765	0.124035	1.19167e-09	0.601649	0.600069	0.603229	0.618076	0.1588	0.00092398	0.792376	0.791211	0.79354	0.134483
SL008623	CNTN2	Q02246	0.403316	0.131704	0.00350463	0.532609	0.530932	0.534286	-0.15704	0.146119	0.405069	0.789555	0.78838	0.79073	0.224975
SL008631	DSC2	Q02487	2.83004	0.174524	1.81643e-57	0.696324	0.694874	0.697774	1.11314	0.210305	3.46281e-06	0.79686	0.795704	0.798017	0.121177
SL008639	IDS	P22304	0.487602	0.189571	0.0143041	0.537013	0.535319	0.538706	-0.362514	0.187707	0.119162	0.79077	0.789591	0.791949	0.14069
SL008644	BST1	Q10588	-0.296097	0.123592	0.0224009	0.539818	0.538127	0.541509	0.108924	0.133492	0.54188	0.789351	0.788158	0.790543	0.282273
SL008728	NRXN3	Q9HDB5	1.57338	0.166067	1.87451e-20	0.616467	0.614932	0.618003	0.604335	0.205946	0.0155385	0.791674	0.790508	0.792841	0.447592
SL008773	CD109	Q6YHK3	0.380353	0.170804	0.0338648	0.52878	0.52708	0.530481	-0.309289	0.160057	0.119162	0.790064	0.788886	0.791241	0.204729
SL008810	NEGR1	Q7Z3B1	1.65373	0.205338	3.70855e-15	0.603523	0.601901	0.605145	0.0951129	0.257488	0.776226	0.789921	0.788753	0.79109	0.387871
SL008822	ADGRE2	Q9UHX3	0.221741	0.156705	0.175081	0.523373	0.521687	0.52506	-0.312218	0.154953	0.103577	0.791166	0.789989	0.792342	0.701137
SL008835	ASGR1	P07306	0.945928	0.13609	1.31413e-11	0.592652	0.59095	0.594353	0.43098	0.141434	0.0115662	0.791757	0.790578	0.792936	0.0855331
SL008865	PSMA2	P25787	0.633014	0.154234	8.1866e-05	0.566533	0.564858	0.568208	0.249571	0.169609	0.243496	0.790216	0.789044	0.791387	0.257229
SL008904	LYVE1	Q9Y5Y7	0.318527	0.168201	0.0695929	0.513715	0.511997	0.515434	0.111153	0.178146	0.636265	0.789712	0.788533	0.790892	0.263356
SL008909	LGMN	Q99538	-0.37311	0.179513	0.0475223	0.531944	0.530299	0.533589	0.279008	0.1857	0.233967	0.790733	0.789563	0.791903	0.617475
SL008931	CD177	Q8N6Q3	0.177614	0.0607379	0.00537735	0.536369	0.534693	0.538045	-0.0102891	0.0585458	0.897728	0.790187	0.789021	0.791353	0.437931
SL008936	CHL1	O00533	0.810482	0.224894	0.000568593	0.545206	0.54362	0.546793	0.15504	0.23587	0.624107	0.789767	0.788599	0.790936	0.451756
SL008945	TGM3	Q08188	0.137329	0.0366066	0.000332678	0.55324	0.551647	0.554833	0.0410271	0.0373845	0.392119	0.790001	0.788835	0.791167	0.529007
SL008956	ARSB	P15848	-0.122037	0.129424	0.368351	0.512123	0.5104	0.513847	0.207609	0.12884	0.200929	0.789309	0.788124	0.790493	0.520944
SL008967	SIRPA	P78324	0.114131	0.0550444	0.0479218	0.559009	0.557322	0.560696	-0.0063492	0.0510877	0.926717	0.790006	0.78884	0.791172	0.641328
SL009054	NRXN1	P58400	0.879421	0.176608	1.53121e-06	0.561491	0.55982	0.563162	0.470718	0.195556	0.0493802	0.790632	0.789455	0.791808	0.548987
SL009089	BCAN	Q96GW7	-0.578963	0.15909	0.000501475	0.550077	0.548403	0.551751	-0.0619847	0.159988	0.764171	0.789848	0.788676	0.791021	0.640627
SL009207	DCTN2	Q13561	2.15581	0.214212	6.57318e-23	0.638406	0.636802	0.64001	0.972656	0.253779	0.00111503	0.7922	0.791027	0.793374	0.0163894
SL009210	POMC	P01189	0.533823	0.100697	2.92453e-07	0.571037	0.569406	0.572669	0.135306	0.111249	0.340546	0.790397	0.789223	0.791572	0.678587
SL009213	CTSA	P10619	0.301097	0.0942627	0.00229866	0.536652	0.534999	0.538306	0.252363	0.107757	0.0570222	0.790905	0.789744	0.792067	0.528605
SL009216	DDC	P20711	-0.419581	0.154166	0.00965548	0.539099	0.537385	0.540813	-0.127745	0.141601	0.501379	0.79016	0.788979	0.791341	0.668255
SL009324	FSTL3	O95633	2.60889	0.158996	9.83136e-59	0.698298	0.696899	0.699697	1.13804	0.202747	8.08467e-07	0.796069	0.794925	0.797213	0.451674
SL009349	FSTL1	Q12841	2.7888	0.268101	2.22512e-24	0.632454	0.630879	0.634028	1.25153	0.313259	0.000662735	0.793315	0.792162	0.794467	0.588788
SL009400	CHRDL1	Q9BU40	2.11059	0.12903	2.09261e-58	0.702112	0.700679	0.703546	0.662289	0.17178	0.001033	0.792089	0.790929	0.793248	0.291535
SL009412	DKK3	Q9UBP4	2.11002	0.173776	8.38781e-33	0.65931	0.65784	0.660781	0.481615	0.206979	0.0588296	0.791701	0.790548	0.792855	0.607268
SL009790	SNRPF	P62306	0.333226	0.195877	0.103168	0.52244	0.520775	0.524105	0.0134456	0.220323	0.964675	0.789211	0.788032	0.79039	0.552293
SL009948	PLXNB2	O15031	1.16343	0.210746	9.01829e-08	0.565579	0.563936	0.567223	0.180661	0.220726	0.54188	0.789242	0.788071	0.790414	0.685731
SL010288	CA6	P23280	-0.619637	0.0788331	1.6656e-14	0.597894	0.596282	0.599505	-0.248425	0.087152	0.018638	0.793052	0.791893	0.79421	0.460109
SL010328	MED1	Q15648	-1.11339	0.261123	4.17872e-05	0.555796	0.554117	0.557474	-0.767187	0.255001	0.012752	0.791635	0.790469	0.792802	0.651854
SL010369	CA4	P22748	0.805264	0.199962	0.000112776	0.550205	0.548504	0.551907	0.00678298	0.194536	0.981195	0.789731	0.788553	0.790909	0.633838
SL010375	ASAH2	Q9NR71	-0.72353	0.110146	1.68464e-10	0.59213	0.590491	0.593769	-0.330631	0.117768	0.0208365	0.791591	0.790423	0.792759	0.00676924
SL010378	RET	P07949	-1.07652	0.128355	2.53472e-16	0.613617	0.611976	0.615259	0.0722247	0.139739	0.703611	0.788308	0.787131	0.789484	0.35201
SL010381	DKKL1	Q9UK85	-0.752241	0.147496	8.34048e-07	0.58566	0.584009	0.587311	0.312041	0.15916	0.114456	0.79082	0.789645	0.791996	0.551397
SL010388	PRSS2	P07478	0.676104	0.0995679	3.85613e-11	0.588482	0.586814	0.59015	0.367327	0.100702	0.00195962	0.792806	0.791629	0.793984	0.0591079
SL010390	CCDC80	Q76M96	2.25719	0.138985	1.30554e-57	0.699716	0.698263	0.701168	0.672997	0.193117	0.0031115	0.793185	0.792029	0.79434	0.122472
SL010391	WFIKKN2	Q8TEU8	0.587461	0.179212	0.00175415	0.54147	0.539829	0.543111	-0.0325955	0.175809	0.892679	0.789984	0.788813	0.791155	0.650017
SL010450	CD48	P09326	1.71733	0.166831	6.60928e-24	0.639107	0.63753	0.640683	0.577219	0.202577	0.018638	0.792266	0.791102	0.79343	0.390366
SL010451	CFC1	P0CG37	0.20912	0.110358	0.0695929	0.538726	0.537108	0.540345	0.182695	0.130662	0.266194	0.790282	0.789113	0.79145	0.308805
SL010454	CNTN4	Q8IWV2	-0.15685	0.241093	0.535044	0.509078	0.507376	0.51078	-0.270838	0.238312	0.374991	0.789948	0.788777	0.791119	0.162301
SL010456	CST1	P01037	0.642146	0.100773	6.06481e-10	0.58467	0.583037	0.586303	-0.105345	0.103535	0.432733	0.789719	0.788548	0.79089	0.385102
SL010457	DLL4	Q9NR61	0.310289	0.14819	0.046031	0.536207	0.534536	0.537877	0.0889886	0.150219	0.654057	0.789879	0.788703	0.791054	0.623686
SL010458	ESM1	Q9NQ30	1.53132	0.14666	1.51524e-24	0.629076	0.627491	0.630661	0.577927	0.161795	0.00241866	0.793188	0.792023	0.794352	0.600364
SL010460	FCGR2B	P31994	0.247687	0.0692503	0.000627486	0.540743	0.539135	0.542352	0.0763013	0.0695858	0.392119	0.790036	0.788867	0.791204	0.570453
SL010464	LRIG3	Q6UXM1	-1.77811	0.290948	2.98997e-09	0.582879	0.58117	0.584588	-0.246108	0.31313	0.555652	0.791053	0.789876	0.79223	0.434329
SL010465	MATN2	O00339	2.10568	0.241546	1.54292e-17	0.608402	0.606796	0.610007	0.605225	0.270788	0.0683659	0.79007	0.788903	0.791237	0.668867
SL010468	RGMB	Q6NW40	1.80251	0.215379	2.93211e-16	0.59944	0.597839	0.601041	0.29147	0.252176	0.367399	0.790282	0.789112	0.791452	0.676719
SL010470	SEMA3E	O15041	0.634611	0.108234	1.29524e-08	0.578645	0.576982	0.580309	0.0617475	0.104531	0.654203	0.789684	0.788507	0.790861	0.484247
SL010471	SPOCK2	Q92563	-0.813225	0.211431	0.000230293	0.5491	0.547414	0.550786	0.30598	0.209254	0.246137	0.790313	0.789144	0.791482	0.638133
SL010488	ABL2	P42684	-0.288974	0.172661	0.108537	0.526702	0.525051	0.528352	0.479794	0.182199	0.0301822	0.790903	0.78973	0.792076	0.33006
SL010489	CAMK1	Q14012	0.199554	0.12146	0.114457	0.522674	0.521023	0.524324	0.231187	0.14235	0.198074	0.79032	0.78915	0.79149	0.599328
SL010490	CAMK1D	Q8IU85	-0.218516	0.146038	0.15105	0.519407	0.517702	0.521113	0.0732793	0.148716	0.715632	0.791236	0.790068	0.792404	0.548539
SL010496	CDK5 CDK5R1	Q00535 Q15078	0.490144	0.187505	0.0128308	0.537586	0.535896	0.539277	0.332043	0.20017	0.190506	0.790375	0.789207	0.791544	0.577318
SL010500	LYN	P07948	-0.122394	0.0451631	0.00990828	0.53225	0.530618	0.533882	0.000415686	0.0504394	0.993424	0.790112	0.788946	0.791277	0.414805
SL010501	MAP2K2	P36507	0.928308	0.116909	8.98594e-15	0.60082	0.599199	0.602442	0.188547	0.12752	0.24175	0.790492	0.789324	0.79166	0.51
SL010502	MAPK8	P45983	0.0760827	0.0528466	0.167445	0.524834	0.523183	0.526484	0.113868	0.0632753	0.152256	0.790609	0.789444	0.791775	0.15778
SL010508	PAK3	O75914	0.418624	0.158881	0.0121961	0.536391	0.534713	0.538068	0.282031	0.170235	0.190761	0.790701	0.789528	0.791873	0.585835
SL010513	PRKACA	P17612	-0.132249	0.0433145	0.00360336	0.536936	0.535315	0.538556	-0.0166554	0.0475311	0.789057	0.79022	0.789053	0.791386	0.571395
SL010514	PTK6	Q13882	0.20018	0.107286	0.0738606	0.522767	0.521054	0.52448	-0.231368	0.111926	0.0944056	0.789104	0.787919	0.79029	0.657406
SL010516	SRC	P12931	-0.205625	0.0354751	1.89398e-08	0.574895	0.573257	0.576532	-0.024259	0.0438239	0.677745	0.790433	0.789268	0.791598	0.549367
SL010517	STK16	O75716	0.206805	0.173509	0.253133	0.511701	0.509998	0.513404	0.0755303	0.173469	0.739359	0.79114	0.789972	0.792307	0.641863
SL010519	ZAP70	P43403	0.656004	0.166671	0.000162014	0.55304	0.551329	0.55475	0.129406	0.168597	0.565911	0.789871	0.788693	0.79105	0.629411
SL010520	AURKB	Q96GD4	0.23688	0.177904	0.201959	0.521719	0.520008	0.52343	0.146858	0.192813	0.568526	0.790148	0.788977	0.79132	0.527219
SL010612	DKK4	Q9UBT3	0.319964	0.0828119	0.000215069	0.556134	0.554501	0.557766	0.165381	0.0990278	0.187404	0.790085	0.788924	0.791245	0.132147
SL010617	TPSB2	P20231	0.279523	0.0797401	0.000810869	0.550486	0.548837	0.552136	0.0890128	0.0779781	0.374447	0.790281	0.789114	0.791448	0.478628
SL010927	KPNB1	Q14974	-0.107276	0.0458217	0.0257508	0.527735	0.526134	0.529336	0.0126702	0.0517105	0.857831	0.790371	0.789206	0.791537	0.526456
SL010928	IMPDH2	P12268	0.0640404	0.096395	0.52669	0.514188	0.512551	0.515826	0.121965	0.115081	0.412004	0.790336	0.789168	0.791504	0.486305
SL011049	MASP1	P48740	-1.38315	0.243598	3.69662e-08	0.576163	0.574485	0.577841	-0.0569212	0.242099	0.860969	0.78983	0.788659	0.791001	0.471148
SL011068	IL17RC	Q8NAC3	1.30196	0.141719	2.5309e-19	0.623335	0.621727	0.624943	0.467484	0.176993	0.0298737	0.790454	0.789287	0.791622	0.704628
SL011069	PRSS27	Q9BQR3	-0.609764	0.177168	0.00100344	0.56056	0.558887	0.562233	0.463245	0.179336	0.03427	0.791456	0.79028	0.792631	0.634754
SL011404	PDE4D	Q08499	0.361981	0.14593	0.0181335	0.532889	0.531216	0.534562	0.246855	0.14984	0.192862	0.789678	0.788497	0.790859	0.518329
SL011448	TNFRSF4	P43489	0.656275	0.135004	2.73263e-06	0.573217	0.571574	0.574861	0.452395	0.142489	0.00812978	0.793178	0.792015	0.79434	0.0468933
SL011499	PPY	P01298	0.679863	0.0758905	1.89642e-18	0.618049	0.616455	0.619643	0.0935999	0.0841555	0.387271	0.790266	0.7891	0.791433	0.49687
SL011510	SST	P61278	0.267824	0.125783	0.0423379	0.538788	0.537138	0.540438	0.311117	0.146398	0.0847163	0.791504	0.790335	0.792672	0.0721209
SL011532	ETHE1	O95571	0.171902	0.0942542	0.0801174	0.523629	0.521998	0.52526	0.130674	0.0984055	0.293916	0.790938	0.789765	0.792111	0.516697
SL011533	SGTA	O43765	-0.212029	0.0461763	9.93723e-06	0.561371	0.559726	0.563016	-0.0156071	0.0520445	0.825106	0.790206	0.789039	0.791373	0.407764
SL011535	RBM39	Q14498	0.238482	0.0971142	0.019231	0.549861	0.548259	0.551464	0.166704	0.106381	0.214138	0.790373	0.789205	0.791541	0.510674
SL011629	AIP	O00170	-0.106726	0.0815382	0.209556	0.516843	0.515196	0.518491	0.178663	0.0975234	0.143847	0.790267	0.789099	0.791436	0.499937
SL011768	NUDCD3	Q8IVD9	0.154165	0.0878244	0.092228	0.53834	0.536728	0.539952	0.20417	0.107028	0.12397	0.789304	0.788128	0.79048	0.556105
SL011769	ANP32B	Q92688	0.30716	0.0988668	0.00302503	0.544051	0.54244	0.545663	0.223138	0.10699	0.091621	0.792073	0.790908	0.793239	0.193152
SL011770	LCMT1	Q9UIC8	0.363805	0.167625	0.0384951	0.538905	0.537277	0.540533	0.205526	0.180505	0.374991	0.791259	0.790093	0.792424	0.434317
SL011809	DCTPP1	Q9H773	0.738645	0.161575	1.07572e-05	0.555821	0.554128	0.557513	-0.0761323	0.161432	0.722686	0.790821	0.789651	0.791991	0.0608679
SL011888	SMOC1	Q9H4F8	2.41803	0.144714	7.32885e-61	0.70863	0.707199	0.710061	1.03023	0.216642	3.58112e-05	0.792857	0.791685	0.794029	0.218768
SL012108	PLCG1	P19174	-0.607251	0.175736	0.000956179	0.552847	0.551173	0.554522	0.199072	0.169059	0.358479	0.788837	0.787657	0.790018	0.543656
SL012168	LIN7B	Q9HAP6	0.0908473	0.126233	0.492923	0.514336	0.512676	0.515995	0.251548	0.145765	0.169885	0.791082	0.789909	0.792254	0.47415
SL012395	NTN1	O95631	1.07552	0.102513	9.04185e-25	0.648882	0.647325	0.650439	0.349794	0.140124	0.041681	0.790126	0.788947	0.791305	0.681677
SL012457	NXPH1	P58417	0.545049	0.160009	0.00112789	0.55051	0.54892	0.552101	0.196725	0.16449	0.349982	0.7901	0.788933	0.791267	0.31324
SL012469	GPC5	P78333	-0.206789	0.11089	0.0739	0.526623	0.524973	0.528273	0.144868	0.110247	0.299834	0.791481	0.790312	0.79265	0.594641
SL012517	RSPO4	Q2I0M5	1.23101	0.0942624	1.10809e-37	0.678258	0.676735	0.679781	0.447278	0.122629	0.00195962	0.793375	0.792217	0.794533	0.424773
SL012538	CDNF	Q49AH0	1.03887	0.163051	6.06544e-10	0.588735	0.587027	0.590442	0.297038	0.185991	0.20566	0.788332	0.787148	0.789516	0.468733
SL012561	REG4	Q9BYZ8	1.23518	0.0957984	8.61071e-37	0.660294	0.658768	0.661819	0.450284	0.113067	0.000662735	0.792355	0.791194	0.793516	0.568322
SL012698	KIR2DL4	Q99706	0.359287	0.0863733	6.50312e-05	0.553039	0.551426	0.554652	0.348063	0.0910311	0.00114174	0.793192	0.792041	0.794343	0.261008
SL012707	PCSK9	Q8NBP7	-0.0598624	0.175993	0.748702	0.512375	0.510707	0.514043	-0.0960667	0.191487	0.712154	0.790225	0.789056	0.791393	0.605201
SL012740	ADAMTS15	Q8TE58	-0.158241	0.143701	0.291889	0.517775	0.516104	0.519445	0.414125	0.151269	0.0235564	0.791235	0.790067	0.792402	0.428879
SL012754	SMPDL3A	Q92484	-0.342439	0.127922	0.010852	0.540118	0.538442	0.541795	0.272841	0.136188	0.105687	0.790836	0.789665	0.792008	0.331379
SL012769	FAM3D	Q96BQ1	0.436153	0.0635369	2.34698e-11	0.597017	0.595445	0.598589	0.116157	0.0695023	0.187404	0.790876	0.789707	0.792044	0.559484
SL012774	CRELD1	Q96HD1	1.20031	0.173285	1.53123e-11	0.591576	0.589899	0.593254	0.593467	0.183859	0.00688122	0.793349	0.792189	0.794508	0.429487
SL012783	WFIKKN1	Q96NZ8	-0.929178	0.149735	1.69868e-09	0.578215	0.576498	0.579933	-0.530409	0.149777	0.00267195	0.791233	0.790055	0.792412	0.465591
SL012822	PRSS22	Q9GZN4	1.66607	0.169821	7.75399e-22	0.623229	0.62165	0.624808	1.03718	0.178639	2.77696e-07	0.799724	0.798592	0.800855	0.475781
SL012881	GPC6	Q9Y625	0.468454	0.148412	0.00257992	0.551313	0.549651	0.552976	0.218745	0.162412	0.285456	0.791814	0.79064	0.792989	0.501381
SL013165	HMGN1	P05114	0.0404874	0.135339	0.777967	0.507568	0.505885	0.509251	-0.0603208	0.139921	0.740562	0.790026	0.788855	0.791196	0.49829
SL013240	CRK	P46108	0.104742	0.0633794	0.112788	0.532203	0.530614	0.533792	0.132193	0.0785844	0.184222	0.791001	0.78983	0.792172	0.265786
SL013490	BOC	Q9BWV1	-0.163409	0.198449	0.433572	0.506801	0.505092	0.50851	0.0499845	0.193926	0.852938	0.789446	0.788266	0.790626	0.690712
SL013548	IL34	Q6ZMJ4	0.28761	0.189098	0.14447	0.527015	0.525322	0.528708	0.0458648	0.195675	0.860969	0.78912	0.787945	0.790295	0.613099
SL013754	RASA1	P20936	-0.103042	0.100475	0.327758	0.519719	0.518088	0.52135	0.245689	0.112701	0.0768588	0.790439	0.789269	0.791609	0.578166
SL014008	FUT5	Q11128	0.989772	0.115194	4.47968e-17	0.614643	0.613079	0.616206	0.292988	0.121279	0.0491369	0.791389	0.79022	0.792558	0.606823
SL014009	HDGFRP2	Q7Z4V5	0.518026	0.116306	1.82284e-05	0.571091	0.569462	0.572721	0.515807	0.136618	0.00131571	0.792226	0.791059	0.793392	0.174286
SL014069	PCSK7	Q16549	-0.416685	0.151561	0.00891756	0.533235	0.531551	0.53492	-0.0238475	0.159305	0.91327	0.789683	0.78851	0.790856	0.606503
SL014070	SLITRK5	O94991	0.661692	0.184432	0.00060321	0.543668	0.542005	0.545332	0.0248374	0.189519	0.924123	0.789722	0.788544	0.790901	0.677745
SL014091	SORCS2	Q96PQ0	-0.588932	0.0849883	1.50994e-11	0.61446	0.612847	0.616073	0.0406205	0.0815457	0.713781	0.790552	0.789378	0.791726	0.341035
SL014092	CDON	Q4KMG0	-1.88794	0.201751	5.52378e-20	0.622927	0.621343	0.624511	-0.414686	0.221466	0.131803	0.790316	0.789138	0.791494	0.0237806
SL014111	KIRREL3	Q8IZU9	0.100597	0.1618	0.552799	0.51	0.508279	0.511721	0.0773023	0.180654	0.740589	0.789591	0.788414	0.790767	0.578008
SL014113	NLGN4X	Q8N0W4	1.01273	0.12669	5.91922e-15	0.606443	0.604843	0.608044	0.507061	0.149381	0.00414563	0.793201	0.792046	0.794356	0.580922
SL014129	HS6ST1	O60243	1.04425	0.280127	0.000361377	0.552759	0.551093	0.554425	0.643802	0.277662	0.0596937	0.79056	0.789387	0.791734	0.616992
SL014228	SLAMF6	Q96DU3	0.585101	0.147609	0.000145487	0.561781	0.560095	0.563467	0.326711	0.157012	0.0923544	0.790566	0.789383	0.791748	0.15964
SL014248	SEMA6B	Q9H3T3	1.34345	0.192583	1.11138e-11	0.603198	0.601594	0.604802	0.466333	0.195658	0.052181	0.792204	0.79104	0.793367	0.188533
SL014268	CD200	P41217	0.809557	0.222755	0.000508286	0.545461	0.54378	0.547142	0.290103	0.227728	0.315951	0.789992	0.78882	0.791165	0.482753
SL014270	CD300C	Q08708	1.61024	0.156404	6.59168e-24	0.634698	0.63313	0.636266	0.436873	0.175441	0.0421961	0.791838	0.790672	0.793004	0.257151
SL014292	SIGLEC14	Q08ET2	0.88951	0.128559	1.60856e-11	0.599489	0.597821	0.601157	0.290076	0.12638	0.0620086	0.791115	0.789935	0.792294	0.0598272
SL014468	SH2D1A	O60880	-0.0185098	0.11126	0.877302	0.49549	0.493829	0.497152	0.316406	0.121538	0.0324868	0.79101	0.789828	0.792192	0.153367
SL014469	SHC1	P29353	0.107144	0.0645432	0.111462	0.538288	0.53672	0.539857	0.187039	0.0801798	0.0581799	0.791008	0.789843	0.792173	0.264574
SL014470	BCAR3	O75815	-0.203108	0.166896	0.243435	0.519836	0.518174	0.521499	0.493565	0.179014	0.0227311	0.791841	0.790663	0.793019	0.450007
SL014735	IMPDH1	P20839	0.125161	0.0634836	0.0594341	0.53722	0.535574	0.538865	0.061288	0.0746079	0.54188	0.791814	0.790651	0.792978	0.401978
SL014983	HIST2H2BE	Q16778	0.662002	0.0953547	1.38536e-11	0.599054	0.597429	0.600679	0.401037	0.110221	0.00200594	0.791668	0.7905	0.792836	0.224861
SL015046	AMIGO2	Q86SJ2	0.725309	0.194512	0.000361247	0.547853	0.546165	0.549542	0.502889	0.198607	0.0386473	0.791537	0.790368	0.792705	0.586443
SL015510	ISG15	P05161	0.139752	0.0633036	0.0352925	0.543109	0.541525	0.544693	0.12758	0.0739725	0.169885	0.790897	0.789735	0.792059	0.245692
SL015728	GCKR	Q14397	0.278928	0.109737	0.0154737	0.542691	0.54107	0.544311	0.308964	0.113856	0.0250413	0.789995	0.788825	0.791166	0.550035
SL016128	TXNDC12	O95881	0.515776	0.153549	0.00132951	0.543275	0.541652	0.544898	0.0139647	0.166011	0.952117	0.789284	0.788113	0.790455	0.394307
SL016130	BRF1	Q92994	0.0441587	0.114284	0.715697	0.51084	0.509134	0.512546	-0.0153104	0.120382	0.925818	0.789023	0.787838	0.790207	0.351597
SL016554	PDE9A	O76083	0.395394	0.108456	0.000490441	0.555303	0.55363	0.556976	0.235917	0.116738	0.10335	0.791447	0.790269	0.792624	0.117125
SL016555	PDE11A	Q9HCR9	-0.0890648	0.0669395	0.201959	0.521552	0.519917	0.523186	0.130934	0.0799926	0.19432	0.790473	0.789309	0.791638	0.467662
SL016566	STK17B	O94768	-0.331658	0.142085	0.0261791	0.541061	0.539389	0.542732	0.315169	0.151918	0.093058	0.790944	0.789773	0.792115	0.569995
SL016928	SLAMF7	Q9NQ25	0.471918	0.102979	1.03068e-05	0.572442	0.570743	0.574142	0.106323	0.103174	0.428478	0.791987	0.790814	0.793159	0.726677
SL016969	CSRP3	P50461	0.207424	0.079162	0.0126549	0.554867	0.553249	0.556485	0.0711116	0.0983837	0.593869	0.789841	0.788672	0.79101	0.434228
SL017106	IFNA10	P01566	0.320423	0.119707	0.010852	0.523906	0.522187	0.525624	0.168329	0.121508	0.270694	0.789793	0.788612	0.790973	0.446044
SL017289	UBB	P0CG47	0.332572	0.169094	0.0599886	0.518684	0.516965	0.520403	0.260667	0.177372	0.243496	0.791639	0.790472	0.792806	0.50908
SL017529	KEAP1	Q14145	0.25073	0.113231	0.0349014	0.524862	0.52315	0.526574	0.224432	0.11154	0.103896	0.790215	0.789041	0.791389	0.268188
SL018256	CHKB	Q9Y259	-0.687103	0.0931326	6.39329e-13	0.609579	0.607932	0.611227	0.164956	0.101177	0.196105	0.791143	0.789975	0.792311	0.644475
SL018509	RSPO3	Q9BXY4	1.70767	0.15206	3.19816e-28	0.649152	0.647609	0.650694	0.720988	0.179203	0.000602564	0.791626	0.790456	0.792795	0.289534
SL018548	SERPINA3	P01011	1.56699	0.153627	1.72163e-23	0.639204	0.637609	0.640798	1.0107	0.163782	7.36243e-08	0.798791	0.797634	0.799949	0.354767
SL018587	ISLR2	Q6UXK2	-0.557027	0.205128	0.00979085	0.543794	0.542094	0.545494	-0.253488	0.215203	0.358479	0.789775	0.7886	0.79095	0.129323
SL018891	DSCAM	O60469	0.487618	0.137335	0.000691284	0.551564	0.549874	0.553253	0.276967	0.147223	0.130058	0.791515	0.790343	0.792686	0.522438
SL018900	FTCD	O95954	-0.197846	0.0539926	0.000459967	0.555209	0.553579	0.556839	-0.0889064	0.0555975	0.205395	0.79088	0.789713	0.792047	0.536027
SL018946	UBE2G2	P60604	1.21687	0.170175	3.24912e-12	0.586244	0.584596	0.587892	0.758041	0.177367	0.000250138	0.793831	0.792651	0.795012	0.465903
SL018971	ZNRF3	Q9ULT6	0.183476	0.100276	0.0793631	0.518898	0.517191	0.520605	0.0664165	0.100753	0.623793	0.790102	0.788925	0.791278	0.594307
SL019019	PIANP	Q8IYJ0	1.713	0.154987	2.20137e-27	0.630278	0.628652	0.631904	0.539053	0.171533	0.0087928	0.791397	0.790216	0.792577	0.0258859
SL019979	HIST3H2A	Q7L7L0	0.214436	0.0841609	0.0152364	0.531598	0.529942	0.533255	0.177549	0.0878774	0.10335	0.790201	0.789032	0.79137	0.567702
SL020171	HHLA2	Q9UM44	0.216917	0.0961261	0.0314809	0.512595	0.510901	0.51429	0.140073	0.0935706	0.235197	0.790844	0.789667	0.792021	0.249418
SL021043	GDF11 MSTN	O95390 O14793	-1.15569	0.175391	1.47585e-10	0.590525	0.588827	0.592224	-0.620166	0.199648	0.00978802	0.791206	0.79003	0.792382	0.0303188
