# Supplementary material for: Plasma proteomic biomarker signature of age predicts health and life span
Source: eLife. 2020 Nov 19;9:e61073. doi: 10.7554/eLife.61073 (PMC7723412; doi:10.7554/eLife.61073)
Supplement: Figure 4—source data 2. [file elife-61073-fig4-data2.xlsx]

## Sheet: Sheet1
Two intervals
SomaId	Target	EntrezGeneSymbol	UniProt	Interval 1 (<15years)			Interval 2 (>15 years)			Schoenfeld residuals v time (globalp)
				Beta	SE	P	Beta	SE	P
SL006119	TFF3	TFF3	Q07654	0.464808	0.062332	8.85316e-14	0.260486	0.122389	0.0333079	0.123169
SL000283	b2-Microglobulin	B2M	P61769	0.413384	0.0608472	1.09219e-11	0.0230311	0.122312	0.850643	0.306576
SL000002	VEGF	VEGFA	P15692	0.307876	0.0546452	1.75988e-08	0.021791	0.0986029	0.825094	0.288358
SL001800	TNF sR-II	TNFRSF1B	P20333	0.304738	0.0604085	4.54423e-07	0.0947367	0.10489	0.366419	0.170611
SL000695	Lipocalin 2	LCN2	P80188	0.277723	0.0557638	6.34694e-07	-0.00205261	0.0977666	0.98325	0.17631
SL003326	I-TAC	CXCL11	O14625	0.274202	0.0569417	1.46838e-06	-0.113717	0.0976929	0.244415	0.642329
SL004742	Afamin	AFM	P43652	-0.247573	0.0533325	3.44955e-06	-0.00203475	0.0992952	0.983651	0.245853
SL011448	TNR4	TNFRSF4	P43489	0.215319	0.0491802	1.19682e-05	-0.121797	0.100212	0.224217	0.813658
SL004876	Kallistatin	SERPINA4	P29622	-0.226386	0.0529467	1.90508e-05	0.0987112	0.103579	0.340588	0.202922
SL004863	TAJ	TNFRSF19	Q9NS68	0.207333	0.0489682	2.29548e-05	-0.114752	0.10447	0.272021	0.429029
SL003542	NG36	EHMT2	Q96KQ7	-0.222704	0.0564293	7.92666e-05	-0.00840361	0.0855662	0.921764	0.0578713
SL019019	PIANP	PIANP	Q8IYJ0	0.204536	0.0544688	0.000173266	-0.0279774	0.102952	0.785813	0.211816
SL004145	HVEM	TNFRSF14	Q92956	0.183371	0.0526152	0.000491885	-0.149562	0.100205	0.135551	0.737279
SL004010	SCF sR	KIT	P10721	-0.180729	0.0523235	0.000552188	0.0932833	0.0967365	0.334894	0.3642
SL000516	MCP-3	CCL7	P80098	0.183125	0.0539844	0.000693362	-0.229164	0.10178	0.0243508	0.517728
SL004154	NCAM-L1	L1CAM	P32004	-0.166053	0.0556545	0.00284834	0.0493981	0.0994558	0.619412	0.0833557
SL004160	TrkB	NTRK2	Q16620	-0.148237	0.0560929	0.00822462	0.00275226	0.0922108	0.976189	0.116187
SL000428	FSH	CGA FSHB	P01215, P01225	-0.0741967	0.0937491	0.428688	0.0978978	0.119959	0.414448	0.0953026
3-intervals
SomaId	Target	EntrezGeneSymbol	UniProt	Interval 1 (<12 years)			Interval 2 (12-18 years)			Interval 3 (>18 years)			Schoenfeld residuals v time (globalp)
				Beta	SE	P	Beta	SE	P	Beta	SE	P
SL006550	ECM1	ECM1	Q16610	-0.191041	0.0604413	0.00157352	0.0121116	0.0722256	0.866826	0.562154	0.21603	0.00926271	0.150825
SL014092	CDON	CDON	Q4KMG0	0.38931	0.08102	1.55e-06	0.04693	0.07235	0.517	0.22975	0.21077	0.276	0.12
SL004357	Myostatin	MSTN	O14793	-0.379349	0.0695302	4.87305e-08	-0.0975402	0.0813725	0.23065	0.0997718	0.196194	0.611078	0.093917
SL003329	HCC-1	CCL14	Q16627	0.432202	0.0674114	1.44187e-10	0.11665	0.0818448	0.154082	0.354756	0.219731	0.106419	0.148176
SL021043	GDF-11/8	GDF11 MSTN	O95390 O14793	-0.232996	0.0721351	0.00123794	-0.125171	0.0829234	0.131176	0.108892	0.207318	0.599416	0.0591264
SL005572	Gelsolin	GSN	P06396	-0.263137	0.0669496	8.4812e-05	-0.110216	0.0746632	0.139897	0.189539	0.193545	0.327431	0.154124
SL009207	Dynactin subunit 2	DCTN2	Q13561	0.391608	0.08249	2.06e-06	0.048292	0.072696	0.5065	0.226197	0.213058	0.2884	0.114
SL010375	ASAH2	ASAH2	Q9NR71	-0.251586	0.0662092	0.000144772	-0.00841618	0.0795816	0.915776	0.0664505	0.224373	0.767108	0.215447
