# Supplementary material for: Plasma proteomic biomarker signature of age predicts health and life span
Source: eLife. 2020 Nov 19;9:e61073. doi: 10.7554/eLife.61073 (PMC7723412; doi:10.7554/eLife.61073)
Supplement: Figure 5—source data 1. [file elife-61073-fig5-data1.xlsx]

## Sheet: Sheet1
			Unadjusted Model				Adjusted Model (age, sex,site)
SomaId	EntrezGeneSymbol	UniProt	beta	SE	B-H FDR	Rsq	beta	SE	B-H FDR	Rsq
SL003869	GDF15	Q99988	0.0716732	0.00325531	1.12377e-84	0.32826	0.0439619	0.00446314	8.729e-19	0.378096
SL002785	NPPB	P16860	0.0664427	0.00337056	1.85199e-70	0.281058	0.0376109	0.00393192	5.5535e-18	0.374095
SL006119	TFF3	Q07654	0.0585613	0.00351787	5.38886e-53	0.219217	0.0334733	0.00364207	9.79886e-17	0.363985
SL001992	TNFRSF1A	P19438	0.0622078	0.00345755	1.68168e-60	0.246407	0.0319698	0.00392671	3.77262e-13	0.357852
SL007206	THBS2	P35442	0.0487216	0.0036483	6.26858e-36	0.152648	0.0277054	0.00341462	3.77262e-13	0.361958
SL008631	DSC2	Q02487	0.0586978	0.00352234	4.47565e-53	0.21906	0.0298716	0.00375934	1.13505e-12	0.356519
SL000052	TNNT2	P45379	0.0467856	0.00369769	1.14358e-32	0.139198	0.0277325	0.0035189	1.58945e-12	0.357268
SL000283	B2M	P61769	0.0624238	0.00345113	5.35129e-61	0.248202	0.0313654	0.004003	1.62976e-12	0.35489
SL002654	EPHA2	P29317	0.0610192	0.00348365	8.93286e-58	0.236586	0.0305059	0.00388379	1.62976e-12	0.358295
SL004140	EFNA4	P52798	0.0548112	0.00358136	8.03805e-46	0.191485	0.0281895	0.00360593	1.62976e-12	0.355599
SL005213	RELT	Q969Z4	0.0545173	0.00358824	2.85571e-45	0.188926	0.0290779	0.00371562	1.62976e-12	0.35622
SL001800	TNFRSF1B	P20333	0.0579134	0.00352807	9.31643e-52	0.213437	0.0289588	0.00374617	2.85127e-12	0.355165
SL001996	ANGPT2	O15123	0.0474279	0.00367611	7.93141e-34	0.144183	0.0264369	0.00344294	3.87111e-12	0.355458
SL009324	FSTL3	O95633	0.0624794	0.00344872	4.35318e-61	0.248418	0.0308541	0.00414167	1.89096e-11	0.352538
SL001777	CST3	P01034	0.0605824	0.00348811	5.63932e-57	0.233542	0.0293461	0.00399376	3.65388e-11	0.350333
SL003329	CCL14	Q16627	0.0504782	0.00363848	1.74881e-38	0.162222	0.0263372	0.00359553	4.02008e-11	0.351421
SL004557	CD59	P13987	0.0557832	0.00354244	3.4259e-48	0.200304	0.0274472	0.00376075	4.5801e-11	0.352386
SL006924	AGRP	O00253	0.0216633	0.00392382	2.0906e-07	0.0298695	0.0229459	0.00322806	1.62722e-10	0.348048
SL005156	NBL1	P41271	0.0533689	0.00360193	2.75621e-43	0.181805	0.0258717	0.0036595	2.0116e-10	0.34669
SL000565	REN	P00797	0.0398691	0.00377247	1.2837e-23	0.101107	0.0239125	0.00340346	2.57034e-10	0.348828
SL000658	GAS1	P54826	0.0538754	0.00358615	2.2989e-44	0.185958	0.0259394	0.00370594	2.83314e-10	0.349415
SL002506	PLAUR	Q03405	0.0564129	0.00356361	1.35129e-48	0.20216	0.0272186	0.00388947	2.83314e-10	0.347684
SL008835	ASGR1	P07306	0.0381083	0.00379694	1.72727e-21	0.0924383	0.0230913	0.00330644	2.98626e-10	0.349652
SL008099	CAPG	P40121	0.0564599	0.0035516	5.86007e-49	0.202868	0.0264787	0.00386387	6.88786e-10	0.346899
SL004458	PI3	P19957	0.0475729	0.00367436	4.86423e-34	0.144431	0.0244003	0.00358686	9.23592e-10	0.34621
SL000522	MMP12	P39900	0.0589736	0.00351108	9.30226e-54	0.22125	0.027069	0.00405052	1.95463e-09	0.345689
SL005230	UNC5C	O95185	0.0561391	0.00355406	1.8627e-48	0.200648	0.0253896	0.00383124	2.70543e-09	0.345318
SL004686	TNFSF15	O95150	0.0495941	0.00365989	7.03834e-37	0.156324	0.0237073	0.00361347	4.00543e-09	0.344107
SL003190	CCL15	Q16663	0.0452986	0.0037139	1.41825e-30	0.130525	0.0222974	0.00346914	9.0491e-09	0.343795
SL000695	LCN2	P80188	0.0453806	0.00370823	9.26856e-31	0.131054	0.0222694	0.00350104	1.32759e-08	0.34309
SL011888	SMOC1	Q9H4F8	0.0564615	0.00354042	3.73512e-49	0.20472	0.0243519	0.00393025	3.56677e-08	0.342633
SL019019	PIANP	Q8IYJ0	0.0423708	0.00374574	1.18252e-26	0.11466	0.0212134	0.00344345	4.29014e-08	0.342647
SL014270	CD300C	Q08708	0.0472207	0.00369301	2.7273e-33	0.141616	0.0218067	0.00354844	4.55389e-08	0.342184
SL003167	CXCL13	O43927	0.0354947	0.00381249	9.37637e-19	0.0808807	0.0203518	0.00334271	6.25211e-08	0.34105
SL003522	ERP29	P30040	0.0408757	0.00376407	8.39509e-25	0.106248	0.0213826	0.00352749	7.11179e-08	0.340524
SL000403	COL18A1	P39060	0.0452618	0.00371717	1.74169e-30	0.130255	0.02116	0.00350797	8.26617e-08	0.339742
SL000343	CTSB	P07858	0.0419769	0.00375198	3.89799e-26	0.112343	0.0207643	0.00346726	1.01363e-07	0.341696
SL002704	PTN	P21246	0.0638018	0.00340215	1.00116e-64	0.262516	0.0282896	0.00472113	1.01363e-07	0.341343
SL001774	FABP3	P05413	0.0427182	0.00373713	3.64038e-27	0.116179	0.023975	0.00401438	1.08207e-07	0.340058
SL005115	SPON1	Q9HCB6	0.0527078	0.00361741	5.08983e-42	0.176433	0.0230398	0.00385999	1.08207e-07	0.340389
SL003327	CFD	P00746	0.0494889	0.00366458	1.16451e-36	0.155561	0.0218519	0.00367629	1.22303e-07	0.339702
SL002688	SPP1	P10451	0.0436491	0.00373505	2.76903e-28	0.12112	0.0206323	0.00349248	1.4779e-07	0.339332
SL018946	UBE2G2	P60604	0.0362596	0.00381729	1.88124e-19	0.0836809	0.0205275	0.00350046	1.86187e-07	0.338608
SL004843	EFNA2	O43921	0.047724	0.00368432	4.77494e-34	0.145045	0.0211861	0.00361665	1.88687e-07	0.337239
SL005357	REG1A	P05451	0.0480423	0.00367162	1.24657e-34	0.147442	0.0210478	0.00360256	2.01784e-07	0.338434
SL001888	SLPI	P03973	0.0477186	0.00367974	4.06158e-34	0.144826	0.0210002	0.00362119	2.47838e-07	0.338759
SL001990	IL1RN	P18510	0.0332471	0.00384729	2.16415e-16	0.0701422	0.0198327	0.00341782	2.47838e-07	0.338809
SL004141	EFNA5	P52803	0.0460442	0.00370744	1.41809e-31	0.134798	0.0206638	0.0035912	3.08597e-07	0.337903
SL005430	SECTM1	Q8WVN6	0.044017	0.0037309	8.96471e-29	0.123485	0.0203673	0.00353956	3.08597e-07	0.335672
SL005172	IGFBP6	P24592	0.0471601	0.0036931	3.20635e-33	0.141298	0.021212	0.00371359	3.84263e-07	0.337661
SL000382	CKB CKM	P12277 P06732	-0.040271	0.00376643	4.10181e-24	0.103241	-0.0201785	0.00354312	4.06448e-07	0.338812
SL010390	CCDC80	Q76M96	0.0587141	0.00351062	2.20696e-53	0.220124	0.02363	0.00414876	4.06448e-07	0.338891
SL008360	FLRT2	O43155	0.0481226	0.00368029	1.33246e-34	0.147143	0.0205382	0.00366563	6.70848e-07	0.33733
SL004357	MSTN	O14793	-0.0395541	0.00377597	3.08965e-23	0.0995076	-0.0195008	0.00348817	7.05174e-07	0.337224
SL000466	IGFBP2	P18065	0.0554336	0.0035714	5.445e-47	0.195405	0.0221441	0.00397347	7.63678e-07	0.337457
SL007429	GPNMB	Q14956	0.032995	0.00384042	3.14955e-16	0.0692558	0.0183499	0.00333264	1.0862e-06	0.33836
SL002644	EGFR	P00533	-0.0485641	0.00367636	3.14035e-35	0.149849	-0.0202689	0.00371962	1.45877e-06	0.335765
SL004352	IL17F	Q96PD4	0.0413059	0.00375925	2.56858e-25	0.108794	0.0191349	0.00353029	1.67906e-06	0.33282
SL000383	CKM	P06732	-0.0357084	0.0038116	5.67737e-19	0.0812073	-0.0186269	0.00345432	1.91803e-06	0.336076
SL012774	CRELD1	Q96HD1	0.0333675	0.00382028	1.02755e-16	0.0714118	0.0179414	0.00333075	1.94598e-06	0.334796
SL002508	IL18BP	O95998	0.0500224	0.00364744	1.09156e-37	0.159383	0.0200834	0.00375281	2.31141e-06	0.33499
SL009349	FSTL1	Q12841	0.0422013	0.00375275	2.21596e-26	0.113269	0.018755	0.00351532	2.48373e-06	0.333876
SL006131	FABP1	P07148	0.0279548	0.00387952	8.07277e-12	0.049738	0.017512	0.00329079	2.62894e-06	0.334926
SL004660	IBSP	P21815	0.0366905	0.00380101	5.13385e-20	0.0857059	0.0184407	0.00346758	2.63578e-06	0.335275
SL007547	HAVCR2	Q8TDQ0	0.0508761	0.00363688	4.7174e-39	0.164627	0.0201066	0.00378935	2.76669e-06	0.3354
SL000323	C7	P10643	0.0411417	0.00375882	3.8476e-25	0.108046	0.0184941	0.00350037	3.07541e-06	0.332975
SL006527	EFEMP1	Q12805	0.0546656	0.00357659	9.56796e-46	0.190606	0.0209455	0.00399876	3.85123e-06	0.334033
SL008380	CTSZ	Q9UBR2	0.0414205	0.00375179	1.52628e-25	0.109228	0.0181254	0.0034848	4.60027e-06	0.334474
SL003542	EHMT2	Q96KQ7	-0.0228221	0.00390789	3.81244e-08	0.0331413	-0.0171755	0.00330626	4.68812e-06	0.335438
SL004863	TNFRSF19	Q9NS68	0.0425344	0.00376914	1.54704e-26	0.114589	0.0183362	0.00353621	4.8688e-06	0.334492
SL010388	PRSS2	P07478	0.0330533	0.0038442	3.03116e-16	0.0694217	0.017273	0.0033545	5.78395e-06	0.334597
SL008486	LGALS9	O00182	0.0418978	0.00375846	5.61088e-26	0.111826	0.0180442	0.00351003	5.96336e-06	0.336417
SL002762	CHGA	P10645	0.0318254	0.0038441	3.46526e-15	0.0644474	0.0174108	0.00340542	6.79091e-06	0.334886
SL000591	TIMP1	P01033	0.0449481	0.00372778	5.97901e-30	0.128276	0.0185297	0.00364337	7.70012e-06	0.333367
SL004673	CTSS	P25774	0.0290315	0.00387743	1.17526e-12	0.0536424	0.0168343	0.00332765	8.72079e-06	0.331949
SL007651	FGF23	Q9GZV9	0.0222337	0.00393764	1.09285e-07	0.031353	0.0166579	0.0033013	9.20562e-06	0.333084
SL014292	SIGLEC14	Q08ET2	0.0351151	0.00388494	9.01649e-18	0.0775359	0.0172855	0.00342861	9.30958e-06	0.333969
SL000408	EPO	P01588	0.0280719	0.00388465	7.08535e-12	0.0502013	0.0165694	0.00330925	1.09219e-05	0.331437
SL004646	LAYN	Q6UX15	0.0477287	0.00368828	5.26365e-34	0.14493	0.0187128	0.00374441	1.13134e-05	0.332567
SL007274	EFNB2	P52799	0.0381793	0.0037966	1.45481e-21	0.0926809	0.0172121	0.00345355	1.19644e-05	0.332492
SL007033	LTBP4	Q8N2S1	0.0517004	0.00362751	2.21258e-40	0.170106	0.0191878	0.00385894	1.23725e-05	0.332923
SL008158	HIST1H3A	P68431	0.0363911	0.00380977	1.18715e-19	0.0841524	0.018484	0.00371669	1.23725e-05	0.334965
SL000433	GCG	P01275	0.0236418	0.00390632	1.12912e-08	0.0355404	0.0168032	0.00338133	1.23958e-05	0.33377
SL012561	REG4	Q9BYZ8	0.0480934	0.0036791	1.35195e-34	0.147071	0.0183592	0.00371208	1.37964e-05	0.332034
SL009400	CHRDL1	Q9BU40	0.0565244	0.00355126	4.86806e-49	0.203268	0.0208329	0.00421912	1.41911e-05	0.333009
SL006970	DLL1	O00548	0.0420036	0.0037598	4.44258e-26	0.112055	0.0172121	0.00354618	2.13007e-05	0.332306
SL011509	PYY	P10082	0.0175867	0.00392376	3.14808e-05	0.0198297	0.0157448	0.00326158	2.39555e-05	0.331223
SL004536	HAMP	P81172	-0.0137735	0.00396543	0.00156381	0.0120638	-0.0157385	0.00326924	2.52866e-05	0.331047
SL004260	RETN	Q9HD89	0.0330841	0.00384814	3.03947e-16	0.0696062	0.0162047	0.00337434	2.64867e-05	0.330086
SL007756	GDF2	Q9UK05	-0.0213418	0.00391628	3.02409e-07	0.0289812	-0.016285	0.00340393	2.85838e-05	0.332755
SL004676	IGFBP5	P24593	0.0166805	0.00394958	9.42023e-05	0.0176805	0.0155017	0.00327344	3.54564e-05	0.331309
SL012822	PRSS22	Q9GZN4	0.0279811	0.00387981	7.77146e-12	0.0498198	0.0158625	0.00334989	3.54564e-05	0.331303
SL004742	AFM	P43652	-0.0223826	0.00392566	8.053e-08	0.0318241	-0.0154393	0.00328494	4.1559e-05	0.330983
SL002684	CSF1	P09603	0.0321382	0.00385672	2.34871e-15	0.0657299	0.0161981	0.00349651	5.66778e-05	0.33166
SL007306	FAM3B	P58499	0.0311463	0.00385729	1.67982e-14	0.0616723	0.0154957	0.00335148	5.85076e-05	0.3307
SL004355	CCL3L1	P16619	0.039331	0.00377753	5.52329e-23	0.0985146	0.0160034	0.00350286	7.49097e-05	0.329804
SL003189	CCL19	Q99731	0.0264506	0.00390411	1.37999e-10	0.0443535	0.0151073	0.00334815	9.64448e-05	0.330838
SL011499	PPY	P01298	0.0425232	0.00374055	6.76007e-27	0.115056	0.0160386	0.00358357	0.000112895	0.331059
SL014248	SEMA6B	Q9H3T3	0.0324144	0.00384751	1.15292e-15	0.0668349	0.0150334	0.00337828	0.000122218	0.329203
SL000019	APOA1	P02647	-0.0218832	0.00392859	1.60943e-07	0.0304184	-0.0146269	0.00328624	0.000122218	0.329302
SL004347	IL22	Q9GZX6	0.0307749	0.0038563	3.34662e-14	0.0603851	0.0153277	0.00344041	0.000122218	0.329203
SL007181	TYK2	P29597	0.0227906	0.00391601	4.23598e-08	0.0330166	0.0162488	0.0036518	0.000122218	0.329779
SL012517	RSPO4	Q2I0M5	0.0479693	0.0036863	2.585e-34	0.146188	0.0167964	0.00378382	0.000127033	0.328342
SL011068	IL17RC	Q8NAC3	0.0383509	0.00379654	9.72206e-22	0.0936124	0.0154907	0.00350018	0.000133678	0.328046
SL005207	NCR1	O76036	0.0310982	0.00387567	2.47298e-14	0.0615887	0.0149453	0.00337962	0.000134625	0.331708
SL000586	F2	P00734	-0.0261111	0.00388714	1.99252e-10	0.0433818	-0.0148618	0.00336904	0.000139897	0.330493
SL000510	LYZ	P61626	0.034839	0.00382664	5.19025e-18	0.0771857	0.0150115	0.00341896	0.000152212	0.328811
SL003188	CXCL9	Q07325	0.0404958	0.00376302	2.19205e-24	0.105109	0.0155117	0.00354061	0.00015753	0.329182
SL012769	FAM3D	Q96BQ1	0.0337913	0.00382795	4.90082e-17	0.0726961	0.0148107	0.00339649	0.000171007	0.329177
SL004151	IL15RA	Q13261	0.0372505	0.00380159	1.45211e-20	0.0882469	0.0151664	0.00349547	0.000185087	0.328923
SL018548	SERPINA3	P01011	0.0345747	0.00383909	1.15128e-17	0.0759358	0.0149257	0.00343856	0.000185087	0.327763
SL008609	FCGR3B	O75015	0.0348033	0.00382222	5.1665e-18	0.0770605	0.0148313	0.00345168	0.000221109	0.328772
SL004146	IL1RL1	Q01638	0.0270085	0.00388951	4.64223e-11	0.046354	0.014933	0.00348715	0.000233708	0.32883
SL013872	LRP1B	Q9NZR2	-0.0143696	0.00396088	0.000928143	0.0131069	-0.0139983	0.00327901	0.00024559	0.329056
SL000427	CX3CL1	P78423	0.0384403	0.00379095	6.89764e-22	0.0939149	0.0149948	0.00352726	0.000258916	0.328856
SL000645	MMP10	P09238	0.0212225	0.00392381	3.73924e-07	0.0286727	0.0139498	0.00328077	0.000258916	0.328656
SL003324	F10	P00742	-0.0307942	0.00384404	2.6847e-14	0.0607613	-0.0143673	0.0033783	0.000258916	0.326544
SL004159	TNFRSF10D	Q9UBN6	0.0243917	0.00391933	4.16974e-09	0.0377595	0.0143472	0.00339238	0.000282617	0.328566
SL003302	CCL23	P55773	0.0362981	0.00381486	1.63802e-19	0.0837088	0.0145368	0.00346104	0.000318008	0.328751
SL005152	RARRES2	Q99969	0.0317446	0.00385962	5.32266e-15	0.0642641	0.0144388	0.00344171	0.00032225	0.326053
SL005171	IGFBP4	P22692	0.0285214	0.0038798	3.0365e-12	0.0517612	0.0140886	0.00336392	0.000329405	0.327416
SL005193	JAM2	P57087	0.0364131	0.00380857	1.11098e-19	0.0843722	0.0150874	0.00366158	0.000436993	0.327001
SL000525	MMP7	P09237	0.0408367	0.00375823	7.93171e-25	0.10617	0.014728	0.00358381	0.000453909	0.327762
SL000306	NPPB	P16860	0.0202987	0.00393273	1.30079e-06	0.0261792	0.0143155	0.00348521	0.000454364	0.327847
SL005233	EDA2R	Q9HAV5	0.0301862	0.00387283	1.3313e-13	0.0579831	0.0142889	0.00349482	0.000488601	0.327342
SL000002	VEGFA	P15692	0.0383442	0.00378853	8.1037e-22	0.0935131	0.0144524	0.00358691	0.000619267	0.327377
SL001720	VCAM1	P19320	0.0392687	0.0037831	7.39505e-23	0.0980619	0.0142917	0.00354769	0.000619267	0.326773
SL004739	ITIH4	Q14624	0.0247678	0.00389677	1.91508e-09	0.039055	0.0136001	0.00338235	0.000633973	0.327281
SL018509	RSPO3	Q9BXY4	0.0417377	0.00373559	4.42561e-26	0.111876	0.014698	0.00369439	0.000750639	0.328546
SL018891	DSCAM	O60469	0.0225584	0.00393398	6.77547e-08	0.032304	0.0132441	0.00334262	0.000796976	0.328826
SL008614	EFNB1	P98172	0.0296722	0.00387084	3.35996e-13	0.0559756	0.0146742	0.00371157	0.000818953	0.327753
SL014468	SH2D1A	O60880	0.00825032	0.00398445	0.0774844	0.0043252	0.0137205	0.00348809	0.000882932	0.327227
SL004783	S100A12	P80511	0.0244318	0.00390597	3.48091e-09	0.0381288	0.0130243	0.00333504	0.000983413	0.323574
SL007328	JAG1	P78504	0.0365775	0.00380834	7.77819e-20	0.0851587	0.0136968	0.00351073	0.000991327	0.325096
SL012783	WFIKKN1	Q96NZ8	-0.026573	0.00389878	1.06524e-10	0.0449068	-0.0132683	0.00340782	0.00101644	0.324487
SL008414	EPHB6	O15197	0.0346207	0.00382282	7.59139e-18	0.0763648	0.0133958	0.00345834	0.00109388	0.325121
SL004477	S100A9	P06702	0.0175885	0.00393844	3.37178e-05	0.0196891	0.0125947	0.00329055	0.00130623	0.326761
SL001737	SFN	P31947	0.0148128	0.00394933	0.000597316	0.013983	0.0137464	0.00362279	0.00147995	0.326133
SL005212	PRLR	P16471	0.0211055	0.00392775	4.49361e-07	0.0283948	0.0127708	0.00337083	0.00150388	0.324316
SL010450	CD48	P09326	0.0403461	0.00376957	3.75594e-24	0.103619	0.013566	0.00361154	0.00168419	0.324382
SL003970	PTH	P01270	0.0376164	0.00379847	5.77148e-21	0.0900497	0.013369	0.00355773	0.00168419	0.324996
SL004152	IL18R1	Q13478	0.0268756	0.00388691	5.60775e-11	0.0459783	0.0125744	0.00335389	0.00171956	0.325111
SL004008	PRTN3	P24158	0.020076	0.00392384	1.60954e-06	0.02566	0.0122206	0.00328919	0.00194912	0.325698
SL002755	PAPPA	Q13219	0.0410668	0.00376868	6.09433e-25	0.107096	0.0135252	0.00364659	0.00198477	0.326297
SL001728	PDGFRA	P16234	0.0266312	0.00388868	8.66107e-11	0.0453628	0.0124689	0.00336925	0.00203545	0.325897
SL005208	RTN4R	Q9BZR6	0.0220419	0.00391304	1.16282e-07	0.0309643	0.0121652	0.00331355	0.00226496	0.325438
SL001880	IFNB1	P01574	0.020297	0.00392633	1.25369e-06	0.0264135	0.0121942	0.00334028	0.00243726	0.326205
SL000134	MET	P08581	-0.00839081	0.00397022	0.0705465	0.00447796	-0.0120828	0.00332123	0.00253577	0.325517
SL000420	FTH1 FTL	P02794 P02792	-0.00580095	0.00397004	0.234344	0.00214119	-0.0123961	0.00340874	0.00253577	0.32634
SL005221	SCARF1	Q14162	0.0278079	0.00387608	9.93153e-12	0.049231	0.0132555	0.00364671	0.00253577	0.325301
SL005184	IL12B IL23A	P29460, Q9NPF7	0.0297197	0.00386178	2.71462e-13	0.0562328	0.0125427	0.0034624	0.00264089	0.325241
SL005087	IGFBP7	Q16270	0.0300669	0.00386351	1.44119e-13	0.0575393	0.0122759	0.00339844	0.00272903	0.324719
SL003323	CCL18	P55774	0.0455697	0.00370308	4.62879e-31	0.132207	0.013762	0.00382007	0.00281269	0.325143
SL000049	PROS1	P07225	-0.00696906	0.00397139	0.142251	0.0030915	-0.0119567	0.00332184	0.00282771	0.324682
SL001815	SOD2	P04179	-0.0264925	0.00389414	1.15024e-10	0.0446194	-0.0120791	0.00336461	0.00291144	0.324563
SL011448	TNFRSF4	P43489	0.0240197	0.00392337	7.5926e-09	0.0366215	0.0121834	0.00339527	0.00291219	0.323652
SL009054	NRXN1	P58400	0.0242557	0.00391347	4.81741e-09	0.0376466	0.0121597	0.00339164	0.00291604	0.323441
SL007025	JAK2	O60674	0.0223704	0.00391051	7.27546e-08	0.0318422	0.0121503	0.00338965	0.00291604	0.326088
SL017529	KEAP1	Q14145	0.0175923	0.00395243	3.57928e-05	0.019658	0.0120112	0.00335276	0.00292106	0.324703
SL009207	DCTN2	Q13561	0.0416221	0.00373842	6.27022e-26	0.111176	0.0130895	0.00365846	0.00295338	0.323723
SL005699	APOL1	O14791	-0.0303039	0.00386781	9.91957e-14	0.05833	-0.0122638	0.00343041	0.00296665	0.325327
SL009210	POMC	P01189	0.0242991	0.00391414	4.55662e-09	0.0374704	0.0120697	0.00339692	0.00320183	0.325891
SL003198	TNC	P24821	0.022107	0.00391708	1.10328e-07	0.0311097	0.0118702	0.00336483	0.00349927	0.324024
SL006610	ADAMTS13	Q76LX8	-0.037018	0.00380155	2.45895e-20	0.0871661	-0.0126611	0.00359439	0.0035466	0.324832
SL014228	SLAMF6	Q96DU3	0.0217819	0.00393557	1.9469e-07	0.0300718	0.0117418	0.00335029	0.00376618	0.327178
SL001729	CSF3	P09919	0.023402	0.0039232	1.8611e-08	0.0347957	0.0116999	0.0033415	0.00379024	0.323304
SL007136	CEBPB	P17676	0.014444	0.00396429	0.000882693	0.0132583	0.011832	0.00338453	0.00384472	0.324375
SL004858	GFRA1	P56159	0.0356806	0.00379897	4.67261e-19	0.0817382	0.0120345	0.00348702	0.00450424	0.326444
SL004153	CSF1R	P07333	0.0255119	0.00389933	6.05035e-10	0.0414064	0.0117047	0.00341143	0.00482089	0.323326
SL004016	CXCL16	Q9H2A7	0.0338534	0.00383827	5.20548e-17	0.0728528	0.0121236	0.00355067	0.00508994	0.324301
SL000545	KLKB1	P03952	-0.0246003	0.00390404	2.65798e-09	0.0384854	-0.0116884	0.00342708	0.00513109	0.324715
SL007173	GRN	P28799	0.0268692	0.00389007	5.86165e-11	0.0459304	0.0116522	0.00342111	0.00518747	0.323699
SL003301	CCL23	P55773	0.0339891	0.00383199	3.51433e-17	0.0734806	0.0118155	0.00347209	0.00521338	0.324269
SL000003	ANG	P03950	0.0210497	0.00392105	4.59668e-07	0.028204	0.0113904	0.00335262	0.00528758	0.32373
SL006915	IL27 EBI3	Q8NEV9 Q14213	0.0196023	0.00395762	3.57308e-06	0.0243494	0.0115139	0.00341101	0.00569234	0.323572
SL001761	TNNI3	P19429	0.0175968	0.00390535	2.84239e-05	0.0202355	0.011082	0.00330479	0.00612867	0.323131
SL007642	ANGPTL4	Q9BY76	0.0175777	0.00394236	3.47455e-05	0.0196465	0.0121121	0.00363486	0.00656792	0.323944
SL004137	EPHA1	P21709	0.0308192	0.00386762	3.64829e-14	0.06033	0.0114757	0.0034603	0.00690807	0.323407
SL000338	CAST	P20810	0.0200507	0.00392151	1.63329e-06	0.025677	0.0111679	0.00337133	0.00696167	0.324853
SL002528	PLA2G2A	P14555	0.0363711	0.00378188	6.99411e-20	0.0852065	0.012077	0.00364757	0.00696257	0.326637
SL000509	LTBR	P36941	0.0184782	0.00394573	1.28128e-05	0.0217157	0.0109634	0.00331298	0.00696847	0.322899
SL003182	ITGAV ITGB5	P06756, P18084	0.00190715	0.00397775	0.719676	0.000233087	-0.0110102	0.00333431	0.00709672	0.320521
SL003744	LGALS3	P17931	0.0402141	0.00377506	5.89246e-24	0.102743	0.0122571	0.00371325	0.00709672	0.323814
SL000360	F10	P00742	-0.0281267	0.00382777	3.09075e-12	0.0517681	-0.0110673	0.00335835	0.00715624	0.323578
SL007502	CHST15	Q7LFX5	0.0369318	0.00380601	3.31024e-20	0.0866897	0.0119805	0.0036338	0.00715624	0.324812
SL000521	MMP1	P03956	0.0284437	0.00387705	3.30906e-12	0.0514158	0.0115632	0.00351684	0.00730696	0.32442
SL004837	INHBA INHBB	P08476 P09529	0.0320995	0.00384904	2.24518e-15	0.065827	0.0113649	0.00346255	0.00741728	0.323346
SL004876	SERPINA4	P29622	-0.0210466	0.00392728	4.81835e-07	0.028192	-0.0108901	0.00333336	0.00778047	0.321791
SL000441	HGF	P14210	0.0229914	0.00390589	2.93138e-08	0.033948	0.0109953	0.00337889	0.00805424	0.324323
SL004180	TNFRSF8	P28908	0.0244817	0.00389386	2.86245e-09	0.0384332	0.01104	0.00339226	0.00805424	0.321035
SL006114	ROR1	Q01973	0.0400701	0.00377139	7.58667e-24	0.102169	0.0118204	0.00364054	0.00821492	0.323032
SL008178	DPT	Q07507	0.0454822	0.00370558	6.42e-31	0.131727	0.012751	0.00394321	0.00855513	0.322641
SL004297	NRG1	Q02297	0.0140386	0.00398763	0.0013411	0.0124766	0.0107845	0.00336162	0.00929861	0.326121
SL000572	SAA1	P0DJI8	0.0170311	0.00393745	6.19383e-05	0.0184562	0.0105789	0.00331616	0.00983632	0.324292
SL008402	LYPD3	O95274	0.0109582	0.00398156	0.0146845	0.00761618	0.0106201	0.00333644	0.0100282	0.323161
SL004804	CADM3	Q8N126	0.017339	0.00395302	4.77478e-05	0.0191582	0.0107914	0.00339626	0.0101707	0.322643
SL000550	SERPINA5	P05154	0.0180425	0.00393292	1.96963e-05	0.0207133	0.0106685	0.00337559	0.0107171	0.324165
SL019096	PIAS4	Q8N2W9	0.0158029	0.00396281	0.000243252	0.0158565	0.0106043	0.0033633	0.0109421	0.322672
SL000455	JUN	P05412	0.00904453	0.003988	0.0508066	0.00518428	0.0107701	0.00342466	0.0111888	0.322882
SL005157	CD209	Q9NNX6	-0.011416	0.0039649	0.0103256	0.00828785	-0.0103512	0.00329376	0.0112149	0.322567
SL000616	VTN	P04004	-0.0228095	0.00391088	3.96538e-08	0.0331212	-0.0104421	0.00333386	0.0115629	0.322778
SL007453	MAPK11	Q15759	0.0209269	0.003951	6.62221e-07	0.0277475	0.0104915	0.00336924	0.0122357	0.32301
SL014983	HIST2H2BE	Q16778	0.0258682	0.00389345	3.18749e-10	0.0425622	0.0106828	0.00343328	0.0122693	0.322961
SL004126	TNFRSF9	Q07011	0.0227438	0.00392585	4.88374e-08	0.0328867	0.0104662	0.00337541	0.0126623	0.323092
SL000458	IFNGR1	P15260	0.022744	0.00389961	3.96538e-08	0.0334147	0.0104317	0.00336784	0.0127398	0.323723
SL003176	CCL1	P22362	0.0213334	0.00392571	3.28052e-07	0.0290797	0.0103529	0.00335172	0.0130467	0.321607
SL003915	KLK8	O60259	0.0136369	0.00395928	0.00171706	0.0118292	0.0102106	0.00332449	0.0137149	0.322229
SL004712	CXCL12	P48061	0.0283029	0.00387974	4.41164e-12	0.0509154	0.0105237	0.00342696	0.0137149	0.323296
SL000048	PROC	P04070	-0.0165694	0.00392203	9.39145e-05	0.0176915	-0.0102256	0.0033336	0.0138057	0.322251
SL001997	IL1R1	P14778	0.0273236	0.00389544	2.93356e-11	0.0474353	0.0103911	0.00339844	0.0141945	0.321607
SL000020	APOB	P04114	-0.00976949	0.0039513	0.0305249	0.00612469	-0.00994619	0.00325682	0.0142979	0.324972
SL000474	IL16	Q14005	0.0246992	0.00389771	2.145e-09	0.0391322	0.0105874	0.00347307	0.0144955	0.322422
SL000558	F2	P00734	-0.0250357	0.00389424	1.22782e-09	0.0398819	-0.0102414	0.00336802	0.0147909	0.323664
SL010457	DLL4	Q9NR61	0.0172745	0.00395181	5.09065e-05	0.0189357	0.0102424	0.0033732	0.0149369	0.323803
SL001796	MPO	P05164	0.0187498	0.00394186	9.16668e-06	0.0223874	0.0101499	0.00335813	0.0155629	0.324058
SL014028	ENTPD5	O75356	-0.00722488	0.00397755	0.127822	0.00331827	-0.00994864	0.00329391	0.0156003	0.322709
SL002602	TFF2	Q03403	0.035373	0.00381539	1.28572e-18	0.079738	0.0107769	0.0035784	0.0159739	0.320676
SL005214	SEMA6A	Q9H2E6	0.017662	0.0039475	3.25585e-05	0.0198398	0.00992701	0.00330548	0.0163464	0.321181
SL004298	GZMA	P12544	0.026223	0.0039004	1.93219e-10	0.0436636	0.0103932	0.00346349	0.016399	0.321946
SL000325	C9	P02748	0.0339388	0.00383002	3.7377e-17	0.0732809	0.0105011	0.00352343	0.0174423	0.32266
SL011180	HK1	P19367	0.0123429	0.0039667	0.00515668	0.00977326	0.0101047	0.0034056	0.0180476	0.32294
SL004362	CLEC11A	Q9Y240	0.0243603	0.00391106	4.0521e-09	0.0376727	0.0099887	0.00336593	0.0180476	0.323205
SL002519	ERBB3	P21860	-0.0248397	0.00391722	2.09786e-09	0.0391833	-0.0103075	0.00348714	0.0186253	0.321695
SL004343	FLT3LG	P49771	0.0117317	0.00398149	0.00849058	0.00877279	0.00987703	0.00334525	0.0186585	0.320517
SL005191	LILRB2	Q8N423	0.0333906	0.00383472	1.27637e-16	0.0712043	0.0103851	0.00351737	0.0186585	0.31938
SL004467	SERPINA10	Q9UK55	-0.0107725	0.00396193	0.0160509	0.00739005	-0.00984654	0.00334489	0.0191021	0.321822
SL007311	SNAP25	P60880	0.0141198	0.00394901	0.0011109	0.0126857	0.00966076	0.00328622	0.0192605	0.323256
SL003340	CHI3L1	P36222	0.0409123	0.0037567	6.30073e-25	0.106504	0.0108611	0.00370238	0.0194774	0.323231
SL004438	CST6	Q15828	0.00490962	0.00397212	0.323374	0.00153461	0.0103661	0.00353255	0.0194774	0.322195
SL000519	CCL3	P10147	0.0272643	0.00389203	3.10674e-11	0.0473637	0.0100467	0.00342864	0.0196015	0.322857
SL007153	LPO	P22079	0.00473214	0.00397937	0.344572	0.00142493	0.00964421	0.00329464	0.0197018	0.321288
SL001766	CGA CGB	P01215,P01233	0.0196434	0.00392521	2.77954e-06	0.0245521	-0.0130858	0.00447392	0.0197622	0.323196
SL004363	CLEC11A	Q9Y240	0.0238621	0.00391416	8.7821e-09	0.0361474	0.00983717	0.00336923	0.020007	0.323014
SL005168	GHR	P10912	-0.025881	0.00388868	2.97034e-10	0.0426206	-0.010114	0.0034668	0.020067	0.323167
SL007179	EPHB2	P29323	0.0394841	0.00377983	4.04116e-23	0.0990983	0.0112361	0.00386938	0.0208611	0.322157
SL000546	PRL	P01236	0.00176049	0.00398677	0.743463	0.000197325	0.00960834	0.00331854	0.0213395	0.321616
SL021043	GDF11 MSTN	O95390 O14793	-0.020734	0.00392275	6.91293e-07	0.0273912	-0.00999134	0.00345642	0.021565	0.320341
SL003739	TNFRSF6B	O95407	0.0161421	0.00395217	0.000164886	0.0166208	0.00970777	0.00336912	0.0221128	0.320617
SL000592	TIMP2	P16035	0.0296948	0.00386588	3.00915e-13	0.0561386	0.00996381	0.00346072	0.0221408	0.32158
SL003183	CXCL10	P02778	0.0359423	0.00381239	3.44964e-19	0.0822316	0.0103392	0.00359212	0.0221408	0.322035
SL004871	TNFRSF21	O75509	0.0370028	0.0037991	2.4442e-20	0.087364	0.0103291	0.00359168	0.0222208	0.320756
SL005169	ICAM5	Q9UMF0	0.0179911	0.00393797	2.13972e-05	0.0205868	0.00949069	0.00330816	0.0226166	0.322135
SL007674	LY9	Q9HBG7	0.022761	0.00392465	4.73058e-08	0.0328896	0.00971415	0.00338892	0.0226976	0.322851
SL005572	GSN	P06396	0.000773483	0.00397747	0.889602	3.80822e-05	-0.0096245	0.00337263	0.023521	0.321427
SL004134	CD27	P26842	-0.0143663	0.003947	0.000891257	0.0132052	-0.00936997	0.00328846	0.0237469	0.324402
SL000478	IL2	P60568	-0.0145983	0.00394781	0.000723423	0.0135697	-0.00952811	0.00334737	0.0238634	0.322393
SL000318	C4A C4B	P0C0L4 P0C0L5	-0.0116296	0.00396565	0.00882434	0.00859487	-0.00953453	0.0033518	0.0239049	0.323473
SL014268	CD200	P41217	0.0197189	0.00394009	2.77954e-06	0.0246998	0.00964373	0.0033983	0.0243182	0.321092
SL003060	FGFR1	P11362	0.032665	0.00384871	7.20981e-16	0.0678259	0.0100579	0.00355324	0.0247668	0.32046
SL012457	NXPH1	P58417	0.020938	0.00392355	5.39847e-07	0.0279067	0.00953499	0.00337479	0.0248131	0.320999
SL017106	IFNA10	P01566	0.0186574	0.00395027	1.06901e-05	0.0222782	0.009426	0.00333377	0.0248131	0.323949
SL000305	NGF	P01138	0.00945908	0.00397876	0.0389308	0.0056881	0.00931752	0.00329973	0.0248131	0.320856
SL004120	DDR2	Q16832	0.0205593	0.00389581	7.20866e-07	0.0274691	0.00949048	0.00335804	0.0248131	0.32445
SL004984	YWHAE	P62258	0.0147337	0.0039581	0.000662985	0.0137895	0.00975094	0.00345339	0.0248131	0.322659
SL010458	ESM1	Q9NQ30	0.0320021	0.00384472	2.50642e-15	0.0654674	0.00983804	0.00349454	0.0253613	0.321726
SL014113	NLGN4X	Q8N0W4	0.0317929	0.00383323	3.11471e-15	0.0649101	0.0100609	0.00358126	0.0257287	0.32197
SL009790	SNRPF	P62306	0.0203114	0.00394112	1.35066e-06	0.0261796	0.0100189	0.00357057	0.0258952	0.321669
SL000070	GPC3	P51654	-0.0153119	0.00396249	0.000393987	0.0148737	-0.00962526	0.00343196	0.0259037	0.322995
SL010501	MAP2K2	P36507	0.0346901	0.00381986	6.16376e-18	0.0766151	0.00993068	0.00355289	0.0265656	0.321653
SL010373	FCAR	P24071	0.0112215	0.00396515	0.0118131	0.00806549	0.00933059	0.00334282	0.0267834	0.320977
SL000254	ALB	P02768	-0.00257436	0.00398795	0.625456	0.000420748	-0.00950973	0.0034108	0.026934	0.321653
SL000485	IL9	P15248	0.018386	0.00394315	1.40674e-05	0.0214679	0.00940591	0.00339617	0.0283142	0.322561
SL004515	PGLYRP1	O75594	0.00676267	0.00398205	0.15825	0.00290777	0.00910329	0.00328726	0.0283142	0.32125
SL002662	F11	P03951	-0.015817	0.0039498	0.000227491	0.0159398	-0.00945871	0.00341789	0.0283657	0.319418
SL007217	IFNGR2	P38484	0.00726921	0.00398922	0.126646	0.00335291	0.00937874	0.00339451	0.0286497	0.322626
SL003733	DIABLO	Q9NR28	0.0234527	0.00391601	1.62916e-08	0.0350654	0.00991093	0.00358958	0.028706	0.32012
SL003755	MCL1	Q07820	0.0202121	0.00394446	1.55976e-06	0.0260163	0.00948834	0.00345235	0.0297192	0.319539
SL002093	H2AFZ	P0C0S5	0.0202164	0.00393999	1.50844e-06	0.0259305	0.00948558	0.00345348	0.029758	0.321658
SL000459	IGHA1 IGHA2	P01876 P01877	0.0321917	0.00384671	1.78701e-15	0.0659431	0.00954553	0.00348027	0.0299987	0.321222
SL010288	CA6	P23280	-0.0288416	0.00387505	1.5938e-12	0.0528394	-0.00967796	0.00353888	0.0306178	0.323244
SL004208	ANXA1	P04083	0.0227178	0.00390992	4.45947e-08	0.032944	0.00930122	0.00342975	0.032672	0.320589
SL001797	KLK6	Q92876	0.0238619	0.00391875	9.14388e-09	0.0362062	0.00920815	0.00340024	0.0329298	0.322193
SL010465	MATN2	O00339	0.0338381	0.00383728	5.23042e-17	0.0727587	0.00987479	0.00364827	0.0329425	0.321512
SL010514	PTK6	Q13882	0.00430818	0.00397614	0.391771	0.00118684	-0.00902755	0.00334002	0.0332053	0.318859
SL008728	NRXN3	Q9HDB5	0.0355264	0.00380442	7.35228e-19	0.080952	0.0095996	0.00355957	0.0336803	0.317597
SL000271	AGT	P01019	-0.0130171	0.00395993	0.00290581	0.0108296	-0.00893449	0.00332653	0.0344293	0.315188
SL002505	NPPA	P01160	0.0172094	0.00395049	5.42947e-05	0.0187896	0.00935136	0.00348167	0.0344293	0.322219
SL004652	WIF1	Q9Y5W5	0.0136688	0.00395715	0.00167073	0.0119205	0.00888752	0.00330775	0.0344293	0.31926
SL011769	ANP32B	Q92688	0.0182856	0.00394226	1.56509e-05	0.0212486	0.00929387	0.00347409	0.0354026	0.321213
SL004143	GFRA2	O00451	0.032005	0.0038487	2.64239e-15	0.0652287	0.00931971	0.00348966	0.0357521	0.320229
SL003303	CCL28	Q9NRJ3	0.0198348	0.00390964	1.97698e-06	0.02529	0.00928012	0.00347856	0.0359262	0.322663
SL004672	TNFRSF17	Q02223	0.0290003	0.00386074	9.88863e-13	0.0537667	0.00910536	0.0034196	0.0363422	0.321939
SL003066	SERPINF1	P36955	0.0185442	0.00393967	1.14909e-05	0.0218686	0.0088432	0.00333738	0.0376227	0.320339
SL005789	STC1	P52823	0.0374932	0.0037971	7.39191e-21	0.089408	0.00955181	0.00364199	0.0405781	0.321824
SL016928	SLAMF7	Q9NQ25	0.020877	0.00394487	6.73548e-07	0.0277574	0.00873402	0.00333217	0.0406284	0.326924
SL000633	FASLG	P48023	0.00878014	0.00399401	0.0594703	0.00488721	0.00870494	0.00332682	0.0410209	0.320569
SL015728	GCKR	Q14397	0.0162971	0.0039447	0.000137523	0.0169993	0.00887282	0.00340684	0.0422012	0.316787
SL007804	BGN	P21810	0.0220177	0.00394027	1.4656e-07	0.0306954	0.00882222	0.00338675	0.0422012	0.321923
SL000055	CDH1	P12830	0.0155975	0.00395652	0.000290469	0.0154556	0.00855462	0.00332293	0.0458528	0.32027
SL003310	VEGFA	P15692	0.0175108	0.00393389	3.57928e-05	0.0196212	0.00873754	0.00339863	0.0461587	0.32319
SL006713	COLEC11	Q9BWP8	0.0143769	0.00395003	0.000891257	0.0131651	0.00845729	0.00331028	0.0481584	0.320017
SL003761	PTEN	P60484	0.0216422	0.00392429	2.15544e-07	0.0299234	0.0089164	0.00349264	0.0482652	0.318385
SL004925	AGR2	O95994	0.00906785	0.00397731	0.0494354	0.005223	0.00878603	0.00344832	0.0486221	0.320897
SL005084	POSTN	Q15063	0.0423914	0.00374274	1.01897e-26	0.114409	0.00961087	0.00377114	0.0486221	0.321435
SL010464	LRIG3	Q6UXM1	-0.0214912	0.00393468	2.83936e-07	0.0293107	-0.00850753	0.00335395	0.0498768	0.321125
SL011510	SST	P61278	0.0167456	0.00393786	8.38808e-05	0.0179383	0.00926538	0.00365199	0.0498768	0.323127
SL000526	MMP8	P22894	0.00133486	0.00399467	0.803821	0.000113236	0.00850784	0.00336746	0.0511506	0.319631
SL007100	LTA4H	P09960	0.0325587	0.00384238	7.95757e-16	0.0674317	0.00885218	0.00351378	0.0519711	0.321288
SL017328	MYBPC1	Q00872	-0.0050838	0.0039795	0.307313	0.00164246	-0.00845093	0.00335561	0.0519711	0.321101
SL004154	L1CAM	P32004	-0.00225591	0.003985	0.670995	0.000323929	-0.00826217	0.00329635	0.0535787	0.320459
SL019978	IFNA7	P01567	0.0117753	0.00397967	0.00820977	0.00880997	0.00833155	0.00333462	0.0542495	0.321246
SL004327	TNFSF13B	Q9Y275	0.0133319	0.00396122	0.00225311	0.0113235	0.00864787	0.00346091	0.0542495	0.3197
SL006397	NRP1	O14786	0.0146243	0.00395518	0.000723423	0.0135946	0.00827788	0.00331096	0.0542495	0.321071
SL000590	SERPINA7	P05543	-0.0102048	0.00397364	0.0236708	0.0066178	-0.00849582	0.00343771	0.0583221	0.319692
SL003170	CCL26	Q9Y258	0.0125575	0.00396241	0.00428018	0.0100632	0.008419	0.00341376	0.0589725	0.318691
SL000462	IGFBP1	P08833	0.0211489	0.00392193	4.06506e-07	0.0284506	0.00850434	0.00345666	0.0595535	0.320522
SL005508	CA9	Q16790	0.0076158	0.00397752	0.105703	0.00368578	0.00822647	0.00334297	0.0595535	0.320523
SL005195	LAG3	P18627	0.0290849	0.0038678	9.37783e-13	0.053877	0.0084963	0.00345659	0.0597349	0.320254
SL003179	ITGA1 ITGB1	P56199, P05556	0.0223895	0.00391522	7.33356e-08	0.0318828	0.00899119	0.00366553	0.0603873	0.320434
SL004579	MRC1	P22897	0.0416399	0.00374935	8.05991e-26	0.110388	0.00920799	0.00377642	0.0626657	0.320383
SL000638	CDH2	P19022	0.0136916	0.00397019	0.00169447	0.0119539	0.0081973	0.00336938	0.0633806	0.319542
SL003994	BMP1	P13497	-0.0256806	0.00390615	4.95939e-10	0.0418331	-0.00831296	0.00341839	0.0633806	0.320342
SL004354	IL19	Q9UHD0	0.00248387	0.00398456	0.638543	0.00039197	0.00800586	0.00329774	0.0639002	0.320654
SL004939	PTPN1	P18031	0.0146902	0.00396067	0.000695463	0.0137877	0.00826627	0.0034181	0.0653435	0.319127
SL012395	NTN1	O95631	0.0400958	0.00375365	4.56622e-24	0.103718	0.00894977	0.00370918	0.0661055	0.321923
SL005764	CD163	Q86VB7	0.0335146	0.0038304	9.10539e-17	0.0715106	0.00860934	0.00357144	0.0661055	0.320291
SL007696	CD93	Q9NPY3	0.0225669	0.00391503	5.72106e-08	0.0324081	0.00809434	0.00335777	0.0661055	0.319232
SL000017	VWF	P04275	0.0235248	0.0039037	1.31203e-08	0.0352135	0.00807575	0.00336532	0.0678818	0.3213
SL010455	CNTN5	O94779	-0.00377436	0.00397412	0.4584	0.000908444	-0.00816891	0.00340936	0.068349	0.319561
SL003326	CXCL11	O14625	0.0248598	0.00389871	1.70104e-09	0.0392966	0.00881737	0.0036916	0.0695381	0.321077
SL010462	FCN1	O00602	0.00758231	0.0039803	0.107616	0.00365581	0.00787554	0.00330589	0.0702813	0.320684
SL011071	PDGFC	Q9NRA1	0.0109224	0.00398167	0.0150654	0.00758169	0.00788836	0.00331088	0.0702813	0.321275
SL005059	TGFBR3	Q03167	0.0295663	0.00386635	3.79594e-13	0.055615	0.00823692	0.00346922	0.0715872	0.320452
SL000001	MUC1	P15941	0.0138264	0.00397146	0.00152912	0.0122045	0.00787566	0.00333491	0.0736266	0.316916
SL003201	KDR	P35968	-0.0308657	0.00385664	2.82473e-14	0.0605951	-0.00822329	0.00348194	0.0736266	0.320256
SL016554	PDE9A	O76083	0.0164795	0.00394552	0.000114156	0.0174901	0.00783105	0.00331972	0.0739217	0.32179
SL005188	IL5RA	Q01344	0.0219948	0.00391783	1.27384e-07	0.030793	0.00790557	0.00335821	0.0746478	0.319779
SL003193	CCL21	O00585	0.00556481	0.00395311	0.251681	0.00199364	0.0076772	0.00327116	0.0756933	0.320988
SL003690	TNFRSF11A	Q9Y6Q6	0.013145	0.00396455	0.00265176	0.0110487	0.00805037	0.00343059	0.0756933	0.31866
SL005675	ATP5B	P06576	0.0118682	0.00396442	0.00744107	0.00896249	0.00849433	0.00362295	0.0758732	0.319255
SL010519	ZAP70	P43403	0.0200655	0.00394465	1.85321e-06	0.0255715	0.00786426	0.00335794	0.0761745	0.31907
SL000516	CCL7	P80098	0.0242678	0.00391512	4.80939e-09	0.0373595	0.00804272	0.00343626	0.0762334	0.322323
SL004855	CNTN1	Q12860	-0.00202642	0.00397046	0.701181	0.000262779	-0.0080287	0.00343694	0.076698	0.32254
SL007828	NRG4	Q8WWG1	0.0100697	0.00397488	0.0260474	0.0064734	0.00779227	0.00333488	0.076698	0.318861
SL011535	RBM39	Q14498	0.0162649	0.00395086	0.000145176	0.0168478	0.00816148	0.00349997	0.0773149	0.321439
SL008591	TFF1	P04155	0.0105524	0.00396105	0.018492	0.0070893	-0.00796088	0.00342619	0.0788028	0.32001
SL014129	HS6ST1	O60243	0.0196062	0.00392449	2.895e-06	0.0245666	0.00789719	0.00340318	0.0791981	0.32228
SL000051	CRP	P02741	0.0288359	0.00386854	1.47961e-12	0.0529377	0.00798114	0.0034492	0.0803565	0.319964
SL003764	NCAM1	P13591	0.00642012	0.00396995	0.181485	0.00262415	-0.00771407	0.00335212	0.0828341	0.31994
SL004333	FGF10	O15520	0.00796258	0.00398368	0.0894008	0.0040234	0.00829453	0.00361879	0.0846088	0.319345
SL015046	AMIGO2	Q86SJ2	0.0149284	0.00396876	0.000574574	0.0141324	0.00769009	0.00335745	0.0847197	0.319518
SL010460	FCGR2B	P31994	0.0180268	0.0039365	2.04066e-05	0.0206614	0.00759697	0.00332026	0.0848825	0.320909
SL005160	ESAM	Q96AP7	0.0185842	0.00393122	1.05169e-05	0.0219882	0.00844548	0.00369207	0.0848825	0.319896
SL008504	GNS	P15586	0.00631094	0.00398013	0.191924	0.00254337	0.00753738	0.0033047	0.0861284	0.317625
SL010496	CDK5 CDK5R1	Q00535 Q15078	0.0154267	0.00395229	0.000338948	0.015171	0.0076658	0.00336341	0.0862427	0.319728
SL000401	ELANE	P08246	0.00980145	0.00397483	0.0310379	0.00612291	0.00763981	0.00335763	0.0868547	0.319587
SL004852	CD274	Q9NZQ7	0.0165628	0.00395383	0.0001088	0.0175036	0.00759665	0.0033403	0.086858	0.317181
SL000087	IL6	P05231	0.0148869	0.00395456	0.000569093	0.0141124	0.00834499	0.00367666	0.0876294	0.321191
SL008588	CD84	Q9UIB8	0.0162214	0.00394543	0.000148082	0.0167382	0.00819567	0.00363425	0.0907474	0.320428
SL009202	AMICA1	Q86YT9	0.00904361	0.00399159	0.0510243	0.00518964	0.00755796	0.00336204	0.0921691	0.318692
SL005218	SIGLEC7	Q9Y286	0.0270564	0.00389477	4.58072e-11	0.0464805	0.00770335	0.00342929	0.092303	0.320824
SL005352	FABP5	Q01469	0.0186332	0.00394396	1.06454e-05	0.0222248	0.00759106	0.00338136	0.0923732	0.316849
SL000523	MMP13	P45452	0.0122735	0.00396214	0.00538006	0.00965756	0.00741507	0.00332042	0.0949494	0.322106
SL018629	RNF43	Q68DV7	0.00844996	0.00399693	0.0705441	0.0045216	0.007478	0.00335881	0.0963432	0.319791
SL014229	CD83	Q01151	0.0109233	0.00398506	0.0151053	0.00757012	0.0073809	0.00331693	0.0963579	0.318911
SL005194	JAM3	Q9BX67	0.0154806	0.00394388	0.000310545	0.0152486	0.00847383	0.0038152	0.0971047	0.320738
SL000428	CGA FSHB	P01215, P01225	0.0282285	0.00387223	4.53691e-12	0.0507029	-0.0117894	0.00531823	0.0978996	0.320725
SL004269	GHRL	Q9UBU3	-0.00333391	0.00399015	0.518882	0.000705383	0.00755883	0.00342269	0.0997281	0.319144
SL001896	CLU	P10909	0.0167621	0.0039489	8.62772e-05	0.0178568	0.00740744	0.00335591	0.0997443	0.319075
SL006629	SIRT2	Q8IXJ6	-0.00972357	0.00396842	0.0323523	0.00600965	-0.00754475	0.00342297	0.100261	0.320216
SL011100	CD226	Q15762	0.00708498	0.00398796	0.136467	0.00318444	0.00777042	0.00352934	0.100622	0.321927
SL003332	MMP17	Q9ULZ9	0.0179166	0.00394365	2.40299e-05	0.0204027	0.0077175	0.00350754	0.1007	0.319946
SL000836	HBA1 HBB	P69905, P68871	-0.0138165	0.00395269	0.0014579	0.0121913	-0.00737079	0.00337037	0.103585	0.320116
SL010509	PAK6	Q9NQU5	0.0104914	0.00396035	0.0191494	0.00700361	0.00832173	0.00380376	0.103585	0.320638
SL004891	HNRNPA2B1	P22626	0.013749	0.00395506	0.00155409	0.0120236	0.00814369	0.00374752	0.106968	0.319532
SL000451	HSPA1A	P0DMV8	0.0296195	0.00387027	3.66062e-13	0.0558035	0.00765666	0.00353831	0.10916	0.31906
SL003990	FGFR2	P21802	0.00856948	0.00397966	0.0649155	0.00466648	0.00718823	0.00332396	0.109241	0.320615
SL004145	TNFRSF14	Q92956	0.0181951	0.00394518	1.76321e-05	0.0211169	0.00733097	0.00340185	0.111025	0.320414
SL001718	IL13	P35225	0.00722218	0.00396944	0.12724	0.00333603	0.00734221	0.00341217	0.111091	0.319558
SL002561	PTHLH	P12272	0.0166271	0.00395607	0.000102692	0.0175477	0.00767618	0.00356783	0.111091	0.319564
SL004718	KPNA2	P52292	0.0123229	0.00397377	0.00533032	0.00964925	0.00749197	0.00348047	0.111091	0.319052
SL000252	A2M	P01023	-0.00624897	0.00397022	0.195175	0.00248611	-0.00726297	0.00338	0.111533	0.319476
SL000573	APCS	P02743	-0.00264826	0.00398254	0.614939	0.000445999	-0.00734672	0.00342404	0.111822	0.318833
SL004844	EPHA5	P54756	0.0195747	0.00394243	3.37206e-06	0.0243927	0.00731162	0.00340617	0.111822	0.319239
SL013165	HMGN1	P05114	0.0129923	0.0039664	0.00302002	0.0107216	0.00713333	0.0033337	0.11293	0.318719
SL008190	SPTAN1	Q13813	0.00807015	0.00398143	0.0840004	0.00414537	0.00725674	0.00339174	0.11293	0.319038
SL013240	CRK	P46108	0.0140418	0.00395784	0.00122451	0.0125296	0.00807762	0.00378937	0.114853	0.320086
SL003916	KLK12	Q9UKR0	0.0177002	0.00394269	3.05414e-05	0.0199322	0.00706608	0.00334345	0.119591	0.319192
SL012698	KIR2DL4	Q99706	0.0159257	0.00394955	0.000204141	0.0161262	0.00722683	0.00341994	0.119591	0.319406
SL007295	CDH15	P55291	0.00519065	0.00397167	0.293177	0.00172754	0.00739443	0.00350256	0.119866	0.318806
SL009412	DKK3	Q9UBP4	0.042847	0.00373962	2.82922e-27	0.116765	0.00814656	0.00386131	0.119947	0.319559
SL004271	GFAP	P14136	0.00605123	0.00398522	0.21282	0.00233288	0.00724694	0.00344397	0.120966	0.319427
SL014684	OAS1	P00973	0.00744374	0.00397836	0.115372	0.00352731	0.00717477	0.00340962	0.120966	0.319577
SL001947	MIA	Q16674	0.0215171	0.00392352	2.52662e-07	0.0294261	0.00706115	0.00335881	0.121229	0.319613
SL004733	LRP1	Q07954	0.0194432	0.00394321	3.96624e-06	0.0240409	0.00715691	0.00341617	0.123089	0.318546
SL002086	FCN3	O75636	-0.0106269	0.00396825	0.0179085	0.00718465	-0.00690442	0.00329868	0.123347	0.319864
SL002706	FCER2	P06734	0.0210662	0.00393624	4.9925e-07	0.0281457	0.00710704	0.00339726	0.123358	0.320138
SL000314	C3	P01024	-0.0191493	0.00393499	5.40641e-06	0.0233394	-0.00779976	0.00375152	0.125674	0.318246
SL002522	RB1	P06400	-0.000749398	0.00398085	0.890414	3.59402e-05	0.00717456	0.00344916	0.125674	0.323003
SL003186	XCL1	P47992	0.0116482	0.00396582	0.00871372	0.00863878	0.00719779	0.00345547	0.125674	0.319625
SL004010	KIT	P10721	-0.0292807	0.00387676	7.52489e-13	0.0544829	-0.00723906	0.00347999	0.125674	0.320621
SL005204	KLRK1	P26718	0.01183	0.00397213	0.00778924	0.00888898	0.00706917	0.00339898	0.125674	0.321263
SL012538	CDNF	Q49AH0	0.0274756	0.00388249	1.93322e-11	0.0482438	0.00730684	0.0035194	0.126253	0.3168
SL004078	BMP7	P18075	-0.00558016	0.00397588	0.252321	0.00197978	-0.00684046	0.00329657	0.126276	0.320369
SL004668	APOE	P02649	-0.00828235	0.00396738	0.0750396	0.00436967	-0.00679288	0.00328348	0.127872	0.31819
SL005228	ULBP2	Q9BZM5	0.00628905	0.00398055	0.193611	0.00252528	0.00686766	0.00334227	0.131952	0.321432
SL006993	MAPK13	O15264	0.00482026	0.00399284	0.335393	0.00147591	0.00694493	0.00338319	0.132259	0.318373
SL000074	TP53	P04637	0.0100893	0.0039772	0.0258406	0.0064974	0.00718661	0.00350916	0.132932	0.31821
SL003187	CCL22	O00626	0.0112331	0.00395972	0.0116092	0.00804727	0.00696823	0.00340244	0.132932	0.32108
SL007022	SYNCRIP	O60506	0.0158537	0.00394866	0.000218342	0.01599	0.00730276	0.00356664	0.132932	0.319341
SL010508	PAK3	O75914	0.0150436	0.003948	0.000476759	0.0145118	0.00678681	0.00333908	0.137456	0.319825
SL004492	TLR2	O60603	0.0140003	0.00396027	0.00128137	0.0125414	0.00677091	0.00333355	0.137575	0.318594
SL005153	CNTFR	P26992	0.0206223	0.0039281	8.26322e-07	0.0270332	0.00682708	0.00336849	0.138674	0.319205
SL014009	HDGFRP2	Q7Z4V5	0.0201568	0.00392527	1.48186e-06	0.0259448	0.00720582	0.00356646	0.140429	0.320635
SL003919	KLK14	Q9P0G3	0.00590772	0.00398075	0.225444	0.00222202	0.00683436	0.00338459	0.140477	0.317344
SL004248	GDNF	P39905	0.00912223	0.0039876	0.0486671	0.00529565	0.00680927	0.00337407	0.140518	0.318163
SL017290	UBC	P0CG48	0.00420591	0.00398086	0.403161	0.00112627	0.00720085	0.00356999	0.140523	0.320274
SL000570	SCT	P09683	0.0108093	0.00394259	0.0151053	0.00757337	0.00675644	0.0033521	0.140673	0.320326
SL004908	TPM2	P07951	0.0184131	0.00395788	1.471e-05	0.0215222	0.00678593	0.00339108	0.145107	0.317142
SL006830	CFHR5	Q9BXR6	0.0154921	0.0039248	0.000285327	0.0155096	0.00671281	0.00335571	0.145107	0.319631
SL006528	FAP	Q12884	-0.00433312	0.00396982	0.389327	0.00120565	-0.00655701	0.00328911	0.147119	0.315426
SL003309	LBP	P18428	0.00951328	0.00397384	0.0372862	0.00574992	0.00660866	0.00331734	0.147243	0.318897
SL003322	FLT4	P35916	0.0116742	0.00396395	0.0085118	0.00867644	0.00654464	0.00329798	0.149579	0.31894
SL003643	GSTP1	P09211	0.0243689	0.00389849	3.54343e-09	0.0377858	0.00748187	0.00377354	0.149818	0.320054
SL008372	FLRT3	Q9NZU0	0.0148597	0.00396225	0.000597316	0.0140219	0.00663812	0.00335081	0.15005	0.318943
SL000597	LTA	P01374	0.0114618	0.00398217	0.0103393	0.0083237	0.00678919	0.00344973	0.15395	0.319724
SL004669	APOE	P02649	-0.00908888	0.003969	0.0484494	0.00525845	-0.00649126	0.00329825	0.15395	0.318189
SL000542	ITGA2B ITGB3	P08514 P05106	0.0109238	0.00396425	0.0145622	0.00758876	0.00760945	0.0038792	0.155898	0.319922
SL006460	GP1BA	P07359	0.0136677	0.00396167	0.00168921	0.0118678	0.00661618	0.00338054	0.157153	0.319773
SL003679	IGF2R	P11717	0.0171055	0.00394534	5.93714e-05	0.0185968	0.00649581	0.00332709	0.158343	0.319402
SL004482	ENG	P17813	0.00786726	0.00398652	0.0941843	0.00392639	0.0065149	0.00333956	0.158343	0.318518
SL004849	IL1RAPL2	Q9NP60	0.00541329	0.00397513	0.268517	0.00187917	0.00651833	0.00334013	0.158343	0.316143
SL010369	CA4	P22748	0.0213541	0.00393387	3.37627e-07	0.0289889	0.00661418	0.00339288	0.158482	0.318696
SL000377	CKB	P12277	0.0151602	0.00394247	0.000421924	0.0147751	0.00650805	0.00335311	0.161264	0.319942
SL006910	CTSV	O60911	-0.0448599	0.00370428	3.46954e-30	0.12914	-0.00768364	0.00397101	0.163112	0.320024
SL004594	TNNI2	P48788	0.0168742	0.0039467	7.61996e-05	0.0180941	0.00674483	0.00349917	0.165517	0.318843
SL000024	F3	P13726	0.0292757	0.0038841	8.4018e-13	0.0544788	0.00687758	0.00357355	0.166268	0.319959
SL006512	HGFAC	Q04756	-0.00630558	0.00398882	0.193531	0.00254867	-0.00633202	0.00330155	0.168452	0.316762
SL005730	PDE2A	O00408	0.00720966	0.00398311	0.128481	0.00330515	0.00689926	0.00360005	0.168611	0.318454
SL002823	SELL	P14151	-0.0258921	0.0038995	3.26221e-10	0.0425933	-0.00674659	0.00352668	0.169353	0.318566
SL004144	GFRA3	O60609	0.00859706	0.00398445	0.0645245	0.00469937	0.00670986	0.00351367	0.169353	0.319037
SL004726	CD97	P48960	0.0182141	0.00393894	1.66916e-05	0.0211209	0.00642718	0.003366	0.169353	0.318144
SL004821	S100A4	P26447	-0.000382477	0.00397861	0.945975	9.30668e-06	-0.00665141	0.00348091	0.169353	0.319028
SL011069	PRSS27	Q9BQR3	-0.0111928	0.00398093	0.0124341	0.00794559	0.00687799	0.00360191	0.169353	0.319144
SL011532	ETHE1	O95571	0.0123077	0.00397551	0.00540116	0.00960763	0.0067601	0.00355202	0.171199	0.318739
SL000164	MB	P02144	0.00711966	0.0039722	0.13259	0.0032248	-0.00673106	0.00353769	0.171199	0.318812
SL004862	PDCD1LG2	Q9BQ51	0.0156111	0.00394086	0.000269886	0.0156036	0.0065632	0.00345172	0.171293	0.317974
SL008085	HIBADH	P31937	0.00508832	0.00400926	0.31074	0.00163756	0.00632343	0.00333752	0.173565	0.319886
SL007049	CST7	O76096	0.0103174	0.00398658	0.0225143	0.00677453	0.00633299	0.00335472	0.175889	0.322507
SL004486	VEGFC	P49767	0.013774	0.00395024	0.00150128	0.0120719	0.0068552	0.00364637	0.178592	0.319783
SL000406	CCL11	P51671	0.0302114	0.00386255	1.08773e-13	0.0580888	0.00657684	0.00350674	0.179814	0.317781
SL004339	FGF5	P12034	0.011754	0.00398591	0.0084438	0.00875108	0.00640645	0.00341678	0.179814	0.319091
SL012740	ADAMTS15	Q8TE58	0.00262494	0.0039863	0.617675	0.000437796	0.0067842	0.00362687	0.181214	0.318971
SL000344	CTSD	P07339	0.0219859	0.00393091	1.4293e-07	0.0307813	0.00632692	0.00338865	0.182217	0.323528
SL004209	ANXA2	P07355	0.0216944	0.003912	1.83711e-07	0.0300696	0.00675175	0.00362297	0.183235	0.318468
SL002763	KLK11	Q9UBX7	0.0106833	0.00395905	0.0170051	0.00728694	0.00616656	0.00331695	0.183367	0.319187
SL004650	FRZB	Q92765	0.0268672	0.00387691	5.08347e-11	0.0463557	0.00637155	0.0034334	0.183367	0.318511
SL005202	MST1	P26927	0.0116234	0.003968	0.00886508	0.00857574	0.00616447	0.00331181	0.183367	0.319727
SL006914	NR3C1	P04150	0.00356037	0.00398806	0.489623	0.000806864	0.0062169	0.00335616	0.183367	0.32015
SL008071	YWHAQ	P27348	0.00936007	0.00396634	0.040667	0.0055714	0.00699086	0.00377283	0.183367	0.319594
SL008381	CTSF	Q9UBX1	0.0110895	0.00397894	0.0133581	0.00780845	-0.00637414	0.00343175	0.183367	0.319453
SL010467	RGMA	Q96B86	0.00673907	0.0039777	0.159393	0.00288806	0.00616179	0.00331715	0.183367	0.318097
SL013570	DYRK3	O43781	0.0105538	0.00397512	0.0188931	0.00709097	0.00637656	0.00343506	0.183367	0.318573
SL013754	RASA1	P20936	0.00234519	0.00398079	0.65749	0.000350454	0.00691355	0.00371942	0.183367	0.318167
SL014209	KLRF1	Q9NZS2	0.0117667	0.00394348	0.00766625	0.00894883	0.00626441	0.00337655	0.183367	0.320013
SL014289	KIR3DS1	Q14943	0.00769552	0.00397532	0.101734	0.0037748	0.00637223	0.00343821	0.183367	0.319317
SL005222	SCARF2	Q96GP6	0.0127202	0.00396524	0.00377945	0.0102878	0.00628291	0.00339439	0.183542	0.319116
SL002922	ICAM1	P05362	0.00982934	0.00396292	0.0299161	0.00615107	0.00606614	0.00328908	0.185522	0.318644
SL004147	IL10RB	Q08334	0.0129678	0.00396619	0.0030778	0.0106934	0.00628593	0.00340848	0.185522	0.319587
SL005164	LGALS2	P05162	0.0106941	0.00399778	0.0180353	0.00722684	0.00626742	0.00340241	0.186014	0.319294
SL008810	NEGR1	Q7Z3B1	0.0330865	0.00383414	2.3604e-16	0.0696956	0.00660763	0.00359321	0.186897	0.31863
SL004850	IL17RA	Q96F46	0.0108109	0.00396035	0.0155969	0.00744087	0.00604976	0.00330501	0.189609	0.318609
SL005200	MICB	Q29980	0.017031	0.0039636	7.01917e-05	0.0184175	0.00612655	0.00334534	0.189609	0.317236
SL004139	EFNA3	P52797	0.00171589	0.00399098	0.749093	0.00018725	0.00608176	0.00332938	0.190802	0.318052
SL000588	TPO	P07202	0.0114413	0.00397979	0.0104309	0.00831246	0.00624813	0.00342637	0.191668	0.319587
SL002078	TGFBR2	P37173	0.00623935	0.00398233	0.197746	0.0024834	0.0060788	0.00333683	0.191668	0.320683
SL007284	CRISP3	P54108	-0.00366428	0.0039892	0.475515	0.00085239	-0.00620754	0.00340626	0.191668	0.318425
SL003308	IL4R	P24394	0.00564876	0.00396673	0.247035	0.00205245	0.00603772	0.00331977	0.192533	0.314964
SL000450	HSPD1	P10809	0.00760434	0.00396698	0.105323	0.00367942	0.00693225	0.00384529	0.198802	0.319589
SL002640	PGF	P49763	0.0122032	0.00397931	0.00592817	0.0094574	0.0060809	0.00337414	0.198802	0.318545
SL002517	TNF	P01375	0.0164088	0.0039649	0.000133757	0.017057	0.00610638	0.00340578	0.20228	0.319001
SL005361	APOD	P05090	0.0168361	0.00395448	8.23035e-05	0.0180337	0.00602323	0.00336056	0.20228	0.317277
SL000124	MMP2	P08253	0.00199858	0.00397466	0.705793	0.000254299	-0.00611177	0.0034144	0.202314	0.318509
SL002081	CDH5	P33151	-0.0031603	0.00398175	0.542454	0.000635272	-0.00593073	0.00331295	0.202314	0.317696
SL004080	BMPR1A	P36894	-0.000486737	0.00399517	0.931703	1.50229e-05	-0.00608913	0.00340402	0.202314	0.31802
SL004330	CD22	P20273	0.00669024	0.00395782	0.16046	0.00287507	0.0064626	0.00361561	0.202314	0.3183
SL010468	RGMB	Q6NW40	0.0272934	0.00388374	2.68469e-11	0.0473789	0.00621128	0.00347396	0.202314	0.318657
SL002524	CD4	P01730	0.0139079	0.0039592	0.00137662	0.0123357	0.00622953	0.00349092	0.203181	0.317162
SL007195	CD70	P32970	0.00561442	0.0039909	0.251681	0.00200928	0.00601893	0.00337571	0.203418	0.312802
SL000021	INS	P01308	0.0049876	0.00398324	0.317807	0.001586	0.00589354	0.00331567	0.205446	0.322401
SL008909	LGMN	Q99538	-0.00482443	0.0039791	0.333836	0.00148266	0.00621948	0.00350328	0.205972	0.31581
SL010451	CFC1	P0CG37	0.0150918	0.00395015	0.000459942	0.0144867	0.00648571	0.00367518	0.21031	0.318419
SL005196	LSAMP	Q13449	0.020659	0.00392606	7.77879e-07	0.0271543	0.00625334	0.00355028	0.211406	0.318921
SL016553	PDE3A	Q14432	0.00602001	0.0039915	0.21654	0.00229935	0.00610752	0.00349369	0.217054	0.31781
SL000039	CXCL8	P10145	0.0220855	0.00392098	1.16282e-07	0.0312048	0.00604742	0.00347014	0.219156	0.317316
SL016130	BRF1	Q92994	0.0118213	0.00397165	0.00782094	0.0089228	0.00593848	0.00343637	0.225152	0.3133
SL005797	PIGR	P01833	-0.0104174	0.00396694	0.0203775	0.00691767	0.0058446	0.0033803	0.225152	0.317046
SL000053	PLAT	P00750	0.0235868	0.00392406	1.4356e-08	0.0352442	0.00595914	0.00345609	0.225623	0.320242
SL003461	POMC	P01189	0.00992578	0.00397294	0.0284967	0.006259	0.00588095	0.00341023	0.225623	0.318535
SL015510	ISG15	P05161	0.0149369	0.00394599	0.000525168	0.0141964	0.00630929	0.00365693	0.225623	0.319402
SL004814	COTL1	Q14019	0.0105843	0.00397455	0.0185164	0.00714099	0.00581388	0.00338456	0.228283	0.316972
SL018625	TLR4 LY96	O00206 Q9Y6Y9	-0.00410375	0.0039805	0.415566	0.00107247	-0.00571406	0.00334219	0.230908	0.317173
SL000011	AFP	P02771	0.0151212	0.00395733	0.000459942	0.0145336	0.00604584	0.00353875	0.230908	0.317774
SL003300	CCL16	O15467	0.0278166	0.00388252	1.0613e-11	0.0494359	0.00598626	0.00350573	0.230908	0.318244
SL003872	IL6ST	P40189	0.0248311	0.00390482	1.88944e-09	0.0392054	0.00587457	0.00344033	0.230908	0.317813
SL004338	FGF20	Q9NP95	-0.0131925	0.00397737	0.00264535	0.0110238	-0.00582465	0.00340498	0.230908	0.321268
SL004475	IFNAR1	P17181	0.00435123	0.00400293	0.39109	0.00119815	0.00565239	0.00332682	0.234621	0.319127
SL004337	FGF19	O95750	-0.00420131	0.00397293	0.402988	0.00112376	-0.00556956	0.00329593	0.238713	0.31827
SL006777	FETUB	Q9UGM5	-0.00365536	0.0039685	0.475102	0.000854522	0.00587747	0.00349664	0.242731	0.315776
SL003520	CALR	P27797	0.00743494	0.00397813	0.115681	0.00352296	0.00563591	0.00337273	0.24715	0.316116
SL007747	TBK1	Q9UHD2	0.00714012	0.00397944	0.132416	0.00324131	0.00574552	0.00343979	0.24715	0.32021
SL000277	APOE	P02649	-0.00655698	0.00394581	0.167827	0.00277877	-0.00545005	0.00327581	0.248572	0.318216
SL004771	AURKA	O14965	0.00721497	0.00398409	0.128481	0.00332516	0.00554145	0.00332795	0.248572	0.317947
SL014269	KIR3DL2	P43630	0.00710212	0.00397932	0.134624	0.00321044	0.00552316	0.00331977	0.248572	0.316845
SL020172	RXFP1	Q9HBX9	0.00616514	0.00399794	0.205258	0.0024133	0.00564547	0.00339207	0.248572	0.318015
SL000249	SERPINA1	P01009	0.0127038	0.00393521	0.00353157	0.0104695	0.00564226	0.00339929	0.249631	0.318679
SL000640	NID1	P14543	0.0178055	0.00393485	2.60438e-05	0.0201843	0.00567539	0.00342139	0.249631	0.318199
SL004856	DSG1	Q02413	0.0099773	0.00397785	0.0278643	0.00633364	0.0056906	0.00342947	0.249631	0.317915
SL008837	CD63	P08962	0.00657078	0.00397815	0.170891	0.00274538	0.00602557	0.0036418	0.251336	0.317471
SL004639	NTRK3	Q16288	0.00206002	0.00398237	0.698483	0.000269941	-0.00548911	0.00332254	0.252126	0.317643
SL002722	CD38	P28907	0.0137593	0.00396057	0.00156381	0.0121289	0.00554781	0.00336585	0.25363	0.318684
SL006675	CKAP2	Q8WWK9	0.0151814	0.00396031	0.000439264	0.0146407	0.00596925	0.0036287	0.25483	0.317907
SL004932	PRDX5	P30044	0.00549887	0.00399134	0.262079	0.00191936	0.00585134	0.00356447	0.256137	0.318099
SL004364	TNFRSF13B	O14836	0.013397	0.00396207	0.00213865	0.0114169	0.00572287	0.00349124	0.256881	0.318246
SL004635	TNFSF8	P32971	0.0183009	0.00393281	1.46654e-05	0.0214046	0.00554954	0.00338936	0.257367	0.315789
SL005209	NOTCH3	Q9UM47	0.0347952	0.00382519	5.49882e-18	0.076989	0.00600705	0.00367565	0.258479	0.317881
SL009948	PLXNB2	O15031	0.0250472	0.00388305	1.07838e-09	0.0402546	0.00559756	0.00342783	0.258509	0.317388
SL004782	TNFAIP6	P98066	0.00873055	0.0039795	0.060044	0.0048382	0.00538795	0.00330266	0.258509	0.319212
SL004899	HSPA8	P11142	0.0125871	0.00396961	0.0042638	0.0100538	0.0060915	0.00373235	0.258509	0.319893
SL010490	CAMK1D	Q8IU85	0.0013118	0.00399809	0.808122	0.000109393	0.00559878	0.00344369	0.259979	0.316715
SL014148	ROBO3	Q96MS0	0.00337987	0.00397073	0.509645	0.000733539	0.00548438	0.00337183	0.259979	0.320842
SL002756	HNRNPK	P61978	0.0106716	0.00399107	0.0180638	0.00721336	0.00543031	0.00333745	0.259979	0.318612
SL001713	IL17A	Q16552	0.00761099	0.00399287	0.107483	0.00367516	0.0054323	0.00336085	0.2644	0.318751
SL004845	EPHB4	P54760	-0.00579858	0.00398279	0.235993	0.0021365	0.00591812	0.00366301	0.2644	0.317741
SL004064	PLA2G1B	P04054	0.00745836	0.00399843	0.11637	0.00351997	0.00539219	0.00334189	0.264539	0.320009
SL004940	PTPN6	P29350	0.0119723	0.00395613	0.00674316	0.00912031	0.00621468	0.00384972	0.264539	0.319148
SL004142	EFNB3	Q15768	0.0112694	0.00395626	0.0112604	0.00811301	0.00565078	0.00350466	0.264649	0.319528
SL003863	KLK5	Q9Y337	-0.00484837	0.00398451	0.332253	0.00150548	-0.0053433	0.00331716	0.264991	0.31664
SL005488	SPARCL1	Q14515	0.00492067	0.00398627	0.323902	0.00153678	-0.00556251	0.00345646	0.265288	0.318104
SL006406	PLXNC1	O60486	0.011013	0.0039598	0.0135715	0.00773717	0.00532893	0.00331769	0.266448	0.315648
SL012881	GPC6	Q9Y625	0.017413	0.00394868	4.30535e-05	0.0193605	0.00552702	0.00344522	0.267008	0.320753
SL009341	BSG	P35613	0.00558356	0.00398907	0.253793	0.00197907	0.00556492	0.00347163	0.267199	0.318522
SL004516	MBL2	P11226	0.0147383	0.00396036	0.000663879	0.0137824	0.00535519	0.00334275	0.267203	0.320721
SL003704	BID	P55957	0.0116091	0.0039611	0.00883988	0.00857588	0.00602865	0.00377285	0.267428	0.318666
SL003774	BCL2L2	Q92843	0.0139785	0.00396781	0.00133163	0.0124187	0.00584034	0.00365482	0.267428	0.317647
SL006544	TGFBI	Q15582	0.035373	0.00382169	1.45624e-18	0.0795703	0.00603648	0.00377676	0.267428	0.31748
SL007888	CST4	P01036	0.0103817	0.00397827	0.0212265	0.00685244	0.00536523	0.00335449	0.267428	0.318138
SL004760	PAFAH1B2	P68402	0.0119204	0.00395629	0.00702729	0.0090414	0.0061734	0.00387447	0.268974	0.319102
SL008931	CD177	Q8N6Q3	0.0141391	0.00394894	0.00109542	0.0127204	0.00527006	0.00330786	0.268974	0.319102
SL001943	IL6R	P08887	0.0140951	0.00395766	0.00116604	0.012625	0.00526564	0.00332748	0.274153	0.318093
SL018587	ISLR2	Q6UXK2	-0.010268	0.00396264	0.0223466	0.00672294	-0.0052491	0.00331832	0.274153	0.316646
SL005181	IL20RA	Q9UHF4	0.0093116	0.00398025	0.0428768	0.005509	0.00538298	0.0034215	0.278383	0.319962
SL004860	HTRA2	O43464	0.00915524	0.00396425	0.0461863	0.00533711	0.00603357	0.00383979	0.278951	0.318551
SL014188	CD244	Q9BZW8	0.00852805	0.00398471	0.066865	0.00462864	0.00536958	0.0034287	0.280861	0.319971
SL004183	CDH3	P22223	-0.0140241	0.00396783	0.00128171	0.0124987	-0.00528255	0.00337116	0.280861	0.317
SL002655	CTGF	P29279	0.0101876	0.00396513	0.023632	0.00659728	0.00578009	0.00369306	0.280868	0.319208
SL003166	ALCAM	Q13740	0.0221025	0.00391683	1.10351e-07	0.0310711	0.00567057	0.00363236	0.282075	0.318178
SL011770	LCMT1	Q9UIC8	0.0133015	0.00396549	0.00233049	0.0112374	0.00552863	0.00353938	0.282075	0.318621
SL017189	KNG1	P01042	0.00775088	0.00397198	0.0984234	0.00382394	0.00513813	0.00329635	0.282902	0.317419
SL004366	TNFRSF12A	Q9NP84	0.00869988	0.00397251	0.060245	0.00484565	0.00519389	0.00333545	0.283263	0.316229
SL008703	CPE	P16870	0.0105798	0.0039686	0.0184621	0.00717061	0.00520465	0.0033584	0.286942	0.319292
SL018887	CRYZL1	O95825	-0.00508791	0.00397902	0.307036	0.0016455	-0.00511272	0.0033092	0.289108	0.317981
SL007207	THBS4	P35443	0.033972	0.00382425	3.18534e-17	0.073964	0.00560624	0.00363536	0.29022	0.317334
SL009045	ENPP7	Q6UWV6	0.00869662	0.00396559	0.0600753	0.00481508	0.00507252	0.0032949	0.2912	0.317937
SL005201	AMH	P03971	0.0220369	0.00392427	1.26853e-07	0.0308695	0.00521345	0.00340993	0.296791	0.316629
SL008916	DPP7	Q9UHL4	0.00303428	0.00399559	0.560867	0.000583954	0.00537623	0.00352053	0.297299	0.316593
SL001802	IFNG	P01579	0.0143607	0.00397185	0.000968217	0.0130848	0.00535922	0.00351213	0.297461	0.317737
SL009951	WNT7A	O00755	0.00460904	0.00399223	0.358741	0.00134998	0.00509159	0.00334309	0.298614	0.319452
SL001897	SPINT2	O43291	0.0103836	0.00396064	0.0206	0.00686044	0.00562443	0.0036958	0.298759	0.31895
SL014088	FCRL3	Q96P31	0.00824562	0.00398362	0.0775045	0.00431338	0.00509634	0.00335121	0.298868	0.318702
SL005173	IL10RA	Q13651	0.0184917	0.0039308	1.16076e-05	0.0218436	0.00518872	0.00341931	0.300241	0.314817
SL004853	ICOSLG	O75144	0.00646582	0.00396901	0.177603	0.00266013	0.00569218	0.00376499	0.302994	0.318929
SL000320	C5	P01031	0.0227059	0.00392153	4.95261e-08	0.0327543	0.00525161	0.00347825	0.30365	0.317563
SL012168	LIN7B	Q9HAP6	0.0109784	0.0039599	0.0139164	0.00771945	0.0053519	0.00355168	0.30454	0.317903
SL004820	PGAM1	P18669	-0.0130623	0.00395266	0.00274942	0.0108566	-0.00541328	0.00359327	0.30454	0.318918
SL000605	RPS27A	P62979	0.0112484	0.00396172	0.0115658	0.00804486	0.00563686	0.00376047	0.308296	0.319116
SL002565	MYC	P01106	0.00736771	0.00399405	0.121351	0.00344273	0.00506598	0.00338102	0.308296	0.317834
SL006705	PFDN5	Q99471	0.0131279	0.00394239	0.00253081	0.0110543	0.00531205	0.00354817	0.308484	0.31702
SL007673	NTN4	Q9HB63	-0.000901287	0.00398278	0.873381	5.18292e-05	0.00502631	0.00336486	0.309946	0.31469
SL007221	STAT3	P40763	0.00874934	0.00396461	0.0583783	0.00487088	0.00575607	0.00386522	0.312134	0.318882
SL010502	MAPK8	P45983	0.0112422	0.00396228	0.0116092	0.00803378	0.00565284	0.00380903	0.314678	0.319008
SL007272	HK2	P52789	0.00668835	0.00398536	0.163488	0.0028483	0.00513896	0.00348316	0.31941	0.316945
SL007620	IL12RB2	Q99665	0.00504873	0.00398176	0.311011	0.00162626	0.00495179	0.00335879	0.319521	0.31591
SL006476	NMT1	P30419	0.00552304	0.00397044	0.256838	0.00194094	0.00571008	0.00389248	0.323452	0.318837
SL003349	HIF1A	Q16665	0.00719968	0.00398822	0.12945	0.00328762	0.00505493	0.00345397	0.325015	0.318596
SL004345	GDF11	O95390	0.00825294	0.00398533	0.0774844	0.00434795	0.00488379	0.0033415	0.325665	0.31476
SL002702	PIM1	P11309	0.00591865	0.00398093	0.22457	0.00223454	0.00495633	0.00339487	0.326091	0.320237
SL004690	WISP3	O95389	0.0135418	0.00397337	0.00195007	0.0116433	0.00485202	0.00333242	0.327976	0.319506
SL005231	UNC5D	Q6UXZ4	0.0209278	0.00392703	5.5965e-07	0.0278594	0.00497744	0.00343159	0.330854	0.317212
SL003672	SOD3	P08294	0.0287099	0.00388705	2.42054e-12	0.0532461	0.00533026	0.00369198	0.333978	0.318812
SL004067	PLA2G10	O15496	-0.00333689	0.00398525	0.518402	0.000709102	-0.00498042	0.00344982	0.333978	0.316137
SL000454	HSP90AB1	P08238	0.00603005	0.0039697	0.21282	0.00231366	0.00563859	0.00391592	0.335196	0.318783
SL006029	CHIT1	Q13231	0.0307755	0.00383407	2.40294e-14	0.0608735	0.00514298	0.00357162	0.335196	0.318169
SL005308	PSME3	P61289	0.00801493	0.00398009	0.0865494	0.00408769	0.00494719	0.00346476	0.342291	0.317156
SL000276	APOE	P02649	-0.00578486	0.00397523	0.235993	0.00213021	-0.00471004	0.00330146	0.342476	0.316924
SL008072	COL8A1	P27658	0.00446342	0.00398303	0.375611	0.00126557	0.00470029	0.00329696	0.342539	0.318128
SL001691	FGF7	P21781	0.0138625	0.00395078	0.00139377	0.0122344	0.00530824	0.0037269	0.342811	0.317702
SL016548	PRKAA1 PRKAB1 PRKAG1	Q13131 Q9Y478 P54619	0.00769759	0.00398546	0.102473	0.00376909	0.00483054	0.00340277	0.345164	0.315443
SL003653	PGK1	P00558	0.00869562	0.00396674	0.0601135	0.00481119	0.00504795	0.00356013	0.345164	0.318353
SL005166	LGALS7	P47929	0.0117433	0.00395025	0.0078796	0.00883017	0.00517155	0.0036464	0.345164	0.318681
SL004353	IL17D	Q8TAD2	0.0069388	0.00398502	0.146062	0.00306238	0.00478877	0.0033825	0.345976	0.316942
SL007242	MAP2K3	P46734	0.00951746	0.00396369	0.0366898	0.00576693	0.00545364	0.00385723	0.346597	0.317682
SL000248	SERPINA3	P01011	0.0137457	0.00395811	0.00156381	0.0120115	0.00469589	0.00332761	0.347744	0.31792
SL002071	GRP	P07492	0.00733544	0.00398664	0.122268	0.00341848	0.00477673	0.00339387	0.349577	0.319376
SL000670	GSTA3	Q16772	0.00649472	0.00399333	0.178351	0.00268096	0.00467388	0.00332792	0.350947	0.316858
SL003341	FGG	P02679	0.0151882	0.00394866	0.000420987	0.0146659	0.00466894	0.00333446	0.352521	0.318584
SL007373	PPID	Q08752	0.0044149	0.00397183	0.37899	0.00124022	0.00545737	0.00389695	0.352521	0.318707
SL007729	ERAP1	Q9NZ08	0.00565776	0.00396916	0.24669	0.00204611	0.00469559	0.00336655	0.355484	0.319315
SL003177	ICAM2	P13598	0.01443	0.0039568	0.000873359	0.0132428	0.00501476	0.00361722	0.360437	0.316892
SL008822	ADGRE2	Q9UHX3	0.00789018	0.00397457	0.0920425	0.00395695	-0.00463691	0.00334877	0.360961	0.317406
SL008709	DSC3	Q14574	0.00298509	0.00399646	0.567902	0.000565511	0.00461089	0.00333982	0.363071	0.317207
SL004128	ACVR1B	P36896	0.00643556	0.00398942	0.182498	0.00262431	0.00466644	0.00340311	0.368721	0.318004
SL003680	AGER	Q15109	0.00126633	0.00397409	0.811942	0.000102035	0.00457399	0.0033447	0.370599	0.318644
SL004466	SERPIND1	P05546	-0.0116009	0.00395699	0.00883033	0.00859004	-0.00457955	0.00336686	0.374969	0.316425
SL004827	S100A6	P06703	0.00906628	0.00397694	0.0494354	0.00522217	0.00488351	0.00359944	0.376696	0.31899
SL009791	HNRNPAB	Q99729	0.0055321	0.00397657	0.256838	0.00194913	0.00507284	0.00376562	0.382031	0.317013
SL000324	C8A C8B C8G	P07357,P07358,P07360	0.00293963	0.00399146	0.574148	0.00054869	0.00448303	0.00332626	0.382031	0.317549
SL004396	STAT1	P42224	0.0142715	0.00394846	0.000969841	0.0129597	0.00525763	0.00390711	0.382425	0.318604
SL001795	IL1B	P01584	0.00294885	0.00394692	0.567902	0.000562949	0.00467522	0.00347801	0.38279	0.318531
SL010530	OCIAD1	Q9NX40	0.00429297	0.00396868	0.392046	0.00118411	0.00476561	0.00355276	0.384128	0.315807
SL014069	PCSK7	Q16549	0.0005851	0.00397571	0.916856	2.18109e-05	0.00465593	0.00348656	0.387647	0.317029
SL003728	BIRC3	Q13489	0.00561965	0.003998	0.251681	0.0019998	0.00451526	0.00339168	0.389889	0.320585
SL004133	BMPR2	Q13873	0.0081479	0.00399711	0.0823667	0.0042136	0.00449498	0.00338974	0.391	0.316771
SL005256	HIST1H1C	P16403	0.00882263	0.00399332	0.0581102	0.0049361	0.00452268	0.00340902	0.391	0.315377
SL006197	DNAJC19	Q96DA6	0.00706804	0.00397127	0.135705	0.00317667	0.00498796	0.00375747	0.391	0.318358
SL006372	YES1	P07947	0.008829	0.00396443	0.0558998	0.00495997	0.0051092	0.00384768	0.391	0.318571
SL003168	CCL27	Q9Y4X3	0.00891358	0.00396206	0.052906	0.00507114	0.00456349	0.00345264	0.39338	0.316167
SL000145	IL1R2	P27930	-0.00357843	0.00397627	0.485559	0.000814946	0.00434307	0.00330561	0.398305	0.317695
SL000004	FGF2	P09038	0.00503079	0.0039711	0.311247	0.00161038	0.00442591	0.00337439	0.399236	0.318541
SL004720	PPP3R1	P63098	-0.00731309	0.00398461	0.123368	0.00339777	0.00465592	0.00355223	0.399247	0.315942
SL011616	EIF4A3	P38919	0.0064488	0.00398953	0.181528	0.00264026	0.00440386	0.00337524	0.402831	0.318944
SL011528	RPS7	P62081	0.00672378	0.00398859	0.161808	0.00287092	0.00469888	0.00361954	0.406873	0.316914
SL004101	SMAD2	Q15796	0.00564049	0.00397027	0.247672	0.00202437	0.00501441	0.00386615	0.407073	0.318515
SL004556	CD55	P08174	0.0348859	0.00382198	4.32827e-18	0.0775516	0.00475768	0.00367801	0.408278	0.31739
SL009792	ADSL	P30566	0.00505046	0.00397859	0.31074	0.00162013	0.00466081	0.00360323	0.408278	0.31873
SL005199	MICA	Q29983	0.00965735	0.00396539	0.0336421	0.00593164	0.0042355	0.00329212	0.41264	0.31862
SL014094	ADGRG5	Q8IZF4	0.00670769	0.00398405	0.162305	0.00285796	0.00440858	0.00343717	0.41484	0.318748
SL003685	NAMPT	P43490	0.0061151	0.00397501	0.206487	0.00238004	-0.00427148	0.00333661	0.415065	0.317014
SL004692	CRLF1 CLCF1	O75462 Q9UBD9	0.00428245	0.00399761	0.39621	0.00116488	0.00433733	0.00339203	0.415065	0.317214
SL007122	IDE	P14735	0.00818805	0.0039667	0.0783357	0.00426833	0.00459793	0.00359496	0.415065	0.317441
SL010461	FCGR1A	P12314	0.00553271	0.00397708	0.256838	0.00194515	0.0044187	0.00345507	0.415065	0.31882
SL009213	CTSA	P10619	0.0142171	0.00394866	0.00101791	0.0128611	0.00438475	0.0034458	0.418245	0.318472
SL014469	SHC1	P29353	0.0111826	0.00395845	0.0119738	0.00795687	0.00480374	0.00377393	0.418245	0.318473
SL010328	MED1	Q15648	-0.0105291	0.00396939	0.0189896	0.00705006	-0.00420394	0.00332427	0.423348	0.316821
SL007869	PPIB	P23284	0.00172837	0.00396424	0.746092	0.000192946	0.00438152	0.0034727	0.424835	0.316239
SL004230	MAPT	P10636	0.00603861	0.00398187	0.213337	0.00232472	0.00428933	0.00341042	0.42644	0.316883
SL007680	ROBO2	Q9HCK4	0.00679735	0.00397362	0.155028	0.00294115	0.00429035	0.00341085	0.42644	0.316612
SL005167	LGALS8	O00214	0.00240806	0.00399079	0.64976	0.000368758	0.00448104	0.00359608	0.433046	0.317706
SL009431	HINT1	P49773	0.00842928	0.00396579	0.0687985	0.00452445	0.00459262	0.00368412	0.433047	0.317241
SL020171	HHLA2	Q9UM44	0.0107134	0.00398184	0.0173149	0.00728115	0.00420074	0.00337037	0.433047	0.319382
SL003199	TIE1	P35590	0.0114903	0.0039624	0.00969601	0.00839724	0.00411593	0.00331075	0.433862	0.317362
SL004351	IL25	Q9H293	0.01079	0.003959	0.0157731	0.00743973	0.00419387	0.0033735	0.433862	0.318151
SL008177	C1QBP	Q07021	0.0130696	0.00396184	0.00280061	0.0108621	0.00437762	0.00352908	0.433881	0.317243
SL008611	NAAA	Q02083	-0.00136246	0.00397464	0.799656	0.000118198	-0.00408128	0.00328737	0.433881	0.317914
SL009089	BCAN	Q96GW7	-0.0126567	0.0039649	0.00397228	0.010178	-0.00421832	0.00339943	0.433881	0.317783
SL007250	PIK3CG	P48736	0.0084696	0.00396995	0.0676735	0.00456267	0.00430058	0.00347656	0.43576	0.317348
SL012148	PEX5	P50542	0.00550361	0.00399697	0.262127	0.00191921	0.00410258	0.00332345	0.436348	0.317699
SL008416	MRC2	Q9UBG0	0.012417	0.00396222	0.00479362	0.00980315	0.00412039	0.00333661	0.436348	0.316948
SL003280	HMGB1	P09429	0.00483296	0.00398764	0.333836	0.00148304	0.00459652	0.00373933	0.438839	0.316827
SL004511	BPI	P17213	0.00492011	0.00397521	0.323186	0.00153878	0.00404759	0.00329501	0.438839	0.318549
SL004642	ADAM9	Q13443	0.00999708	0.00397913	0.027589	0.0063738	0.00413764	0.00336528	0.438839	0.314352
SL010529	UFC1	Q9Y3C8	0.00674372	0.00396854	0.158126	0.00289371	0.00471713	0.00384799	0.439317	0.318392
SL000530	OSM	P13725	0.00902351	0.0039522	0.0491566	0.00524316	0.00412203	0.00336357	0.439317	0.318723
SL003304	IGF1R	P08069	0.0193108	0.00394492	4.72125e-06	0.0236556	0.00414841	0.00338626	0.439317	0.317478
SL007871	CMPK1	P30085	-0.00227563	0.00398008	0.66792	0.000330098	0.00439423	0.0035914	0.439792	0.315933
SL014470	BCAR3	O75815	-0.00402089	0.0039926	0.42706	0.00102861	0.00434062	0.0035566	0.44145	0.316365
SL000142	TYMS	P04818	0.00617463	0.00397648	0.201998	0.00244189	0.00402307	0.00329975	0.441704	0.317201
SL000496	LTF	P02788	-0.00166493	0.00396758	0.754271	0.000177303	0.00398675	0.0032852	0.44461	0.319055
SL005846	MSN	P26038	0.00991367	0.00396786	0.0284967	0.00630399	0.00408301	0.00336283	0.44461	0.316059
SL000414	CFB	P00751	-0.00114155	0.00398651	0.832927	8.29035e-05	-0.00401261	0.00333263	0.451141	0.315258
SL007361	CLC	Q05315	0.00522835	0.0039857	0.291002	0.00174039	0.00412418	0.0034406	0.454544	0.31657
SL004759	EIF5	P55010	0.0102032	0.00396233	0.0232863	0.00662665	0.00436993	0.00366958	0.459745	0.318136
SL007631	SOST	Q9BQB4	0.0251725	0.00389768	1.0298e-09	0.040311	-0.00499838	0.00419994	0.459745	0.318668
SL018921	N6AMT1	Q9Y5N5	0.00806927	0.00396606	0.0827257	0.00414309	0.00468965	0.00395427	0.462241	0.318326
SL004823	PPIA	P62937	0.0045344	0.00397509	0.365933	0.00130734	0.00450477	0.00382717	0.467895	0.318591
SL008193	NID2	Q14112	0.0133465	0.00395568	0.00219039	0.011323	0.00400229	0.00340073	0.467895	0.318464
SL008466	HAAO	P46952	0.00856594	0.00397536	0.0647847	0.00466799	0.00421917	0.00359223	0.469039	0.321293
SL013488	CLEC1B	Q9P126	0.00346137	0.00397278	0.499846	0.000762345	0.00439549	0.0037692	0.471158	0.318294
SL016969	CSRP3	P50461	0.0189032	0.00393212	7.17705e-06	0.0227221	0.00425165	0.00363582	0.471158	0.318967
SL003792	GRB2	P62993	0.00342277	0.00397739	0.504967	0.000745223	0.00443953	0.00380739	0.471158	0.317874
SL004356	CCL4L1	Q8NHW4	0.012876	0.00395806	0.00325276	0.0105872	0.00392599	0.00336398	0.471158	0.318566
SL005178	IL37	Q9NZH6	0.000719351	0.00398331	0.894107	3.29748e-05	0.00402015	0.00344922	0.471158	0.314677
SL005223	IL27RA	Q6UWB1	0.014519	0.00395936	0.000812303	0.013414	0.003918	0.00335224	0.471158	0.315254
SL006550	ECM1	Q16610	-0.0124299	0.00396288	0.00475968	0.00982988	-0.00387983	0.00332448	0.471158	0.316501
SL008759	GP6	Q9HCN6	0.00815826	0.00396587	0.0793219	0.00423498	0.00438826	0.0038121	0.481758	0.31827
SL011405	PDE5A	O76074	0.00175156	0.00397391	0.743485	0.000195212	0.00436832	0.00380945	0.483847	0.318263
SL016566	STK17B	O94768	-0.00718852	0.00397173	0.128481	0.00329137	0.00423218	0.00368823	0.483847	0.317162
SL014208	CRTAM	O95727	0.00411227	0.00399583	0.416301	0.00107301	0.00409235	0.00357404	0.483905	0.317228
SL004737	TPM1	P09493	0.000868632	0.00399117	0.877139	4.79881e-05	0.00389276	0.00340026	0.483905	0.316924
SL003735	TNFSF9	P41273	-0.00378411	0.0040104	0.462128	0.000906756	-0.00382438	0.0033625	0.489148	0.317324
SL004063	FGFR3	P22607	0.00442686	0.00398456	0.37899	0.00124903	0.00384871	0.00339292	0.489697	0.317668
SL004118	ACP5	P13686	0.0141602	0.00395638	0.00109885	0.0127613	-0.00387969	0.00342133	0.489697	0.316221
SL007056	BMP10	O95393	0.0153334	0.00395273	0.000372747	0.0149874	0.00381977	0.00336408	0.489697	0.316929
SL014294	EPHA10	Q5JZY3	0.00712266	0.00399503	0.134989	0.00321344	0.00379556	0.0033699	0.494594	0.319941
SL004864	CDH12	P55289	0.00753918	0.00397956	0.109895	0.0036122	0.00404762	0.00359448	0.494594	0.320434
SL006992	MATN3	O15232	0.00800433	0.00398151	0.0871151	0.00406583	0.00381698	0.00339674	0.495755	0.317469
SL007223	BCL6	P41182	0.00959483	0.00400198	0.0369958	0.00581352	0.00378373	0.00337049	0.495932	0.319881
SL011530	DYNLRB1	Q9NP97	0.00937499	0.00396317	0.0401222	0.00559239	0.0043069	0.00384994	0.496911	0.31822
SL014008	FUT5	Q11128	0.0237594	0.00390308	9.18203e-09	0.0359396	0.00387041	0.00345847	0.496911	0.317168
SL018938	SUMO3	P55854	0.00878203	0.00396453	0.0573455	0.00490734	0.00438162	0.00391668	0.496911	0.31822
SL010378	RET	P07949	-0.023309	0.00390856	1.86873e-08	0.0347454	0.00403333	0.00360918	0.497136	0.310323
SL004859	TNFRSF18	Q9Y5U5	0.0109565	0.00395842	0.0140843	0.00776479	0.00370465	0.00332168	0.498215	0.318862
SL002803	UCHL1	P09936	0.0060815	0.00397333	0.208609	0.00235128	0.00385958	0.00347347	0.500817	0.318159
SL013489	AMN	Q9BXJ7	-0.00277682	0.00400478	0.598	0.000489342	-0.00371281	0.00334441	0.500915	0.315542
SL004350	IL17B	Q9UHF5	-0.00279195	0.00396671	0.591213	0.000501671	-0.00372643	0.00338743	0.506903	0.316375
SL010469	HFE2	Q6ZVN8	0.0022297	0.00397067	0.674027	0.000318092	0.00363983	0.00330739	0.506903	0.319972
SL011508	ADCYAP1	P18509	0.00614839	0.00397618	0.204338	0.00241915	0.00363451	0.00330369	0.506903	0.314042
SL005102	SHBG	P04278	0.0113328	0.0039578	0.0107747	0.00818925	-0.0038	0.00347325	0.511058	0.315396
SL010528	UFM1	P61960	0.00716432	0.0039678	0.12945	0.00326593	0.00410775	0.00376083	0.51182	0.31818
SL004714	LIFR	P42702	-0.00121476	0.00398169	0.820259	9.38204e-05	0.00360551	0.00330504	0.512179	0.317011
SL002539	TNFRSF11B	O00300	0.0140179	0.00397196	0.00130417	0.0124871	0.00363949	0.00334248	0.513131	0.317507
SL008933	PARK7	Q99497	0.00722162	0.00398957	0.128481	0.00331543	0.00361257	0.0033378	0.514068	0.314977
SL010368	IDUA	P35475	-0.000500033	0.00397514	0.929207	1.59184e-05	-0.00367634	0.00339843	0.514068	0.317112
SL010376	MMEL1	Q495T6	0.00206657	0.00398787	0.698483	0.00027201	0.00377085	0.00349081	0.514068	0.316577
SL014130	CHST6	Q9GZX3	0.00219428	0.0039974	0.678636	0.000305198	0.00365621	0.00338479	0.514068	0.317365
SL017612	HSP90AA1 HSP90AB1	P07900 P08238	0.00470295	0.0039715	0.34707	0.00140733	0.00422771	0.00391108	0.514068	0.318163
SL000566	RBP4	P02753	0.0028102	0.00394132	0.585646	0.000514294	0.0035514	0.00328927	0.514068	0.319572
SL005679	TPT1	P13693	0.00624772	0.00396936	0.195175	0.0024837	0.0042064	0.00389292	0.514068	0.318162
SL006132	LMNB1	P20700	0.00731604	0.00397105	0.121805	0.00342024	0.00393786	0.003638	0.514068	0.315734
SL007356	NOTCH2	Q04721	0.00666008	0.00400251	0.167732	0.00281164	0.00364338	0.00336946	0.514068	0.316855
SL000022	FGA FGB FGG	P02671 P02675 P02679	0.0136804	0.00396316	0.00168128	0.0119046	0.00359216	0.00333839	0.51563	0.317437
SL008008	ARG1	P05089	0.0059119	0.00398625	0.225597	0.00223028	0.00356828	0.00331622	0.51563	0.315082
SL008113	ATP5O	P48047	0.00326306	0.00397295	0.52662	0.000677494	0.0041714	0.00388093	0.515849	0.318154
SL004768	AIF1	P55008	0.00811675	0.00396888	0.0812799	0.00419846	0.00398854	0.00371861	0.516565	0.31531
SL018900	FTCD	O95954	-0.00163069	0.00398125	0.759224	0.000168921	0.00362325	0.00337927	0.516565	0.318188
SL003687	NME1	P15531	0.00806669	0.00396389	0.0827257	0.00415744	0.00397007	0.00371543	0.518112	0.318729
SL010499	HCK	P08631	0.00284704	0.00398543	0.585646	0.000519397	0.00357221	0.0033425	0.518112	0.318374
SL000247	PGD	P52209	-0.0325001	0.00383842	8.3037e-16	0.0672088	-0.00451847	0.00424627	0.519	0.318138
SL000479	IL3	P08700	0.00387934	0.00398694	0.445961	0.000956363	0.0036264	0.0034074	0.519	0.315667
SL001890	TACSTD2	P09758	0.00367498	0.00399061	0.475102	0.000856765	0.00376055	0.00353461	0.519	0.317677
SL004015	CPB2	Q96IY4	-0.00666319	0.00397713	0.16402	0.00282437	-0.00351992	0.0033073	0.519	0.316621
SL008094	PGM1	P36871	0.0102822	0.00397786	0.0226802	0.00673077	0.00361936	0.00342211	0.522702	0.313829
SL011588	RPS3A	P61247	0.00668545	0.00397965	0.163134	0.00285111	0.00364104	0.00344022	0.522702	0.317012
SL006922	RAD51	Q06609	0.0130544	0.00396987	0.00290028	0.010848	0.00352929	0.00335212	0.525912	0.314033
SL010488	ABL2	P42684	-0.00595478	0.00397708	0.220612	0.00225482	0.00370112	0.00351914	0.526123	0.317311
SL000396	CYCS	P99999	-0.00814647	0.00397051	0.0801142	0.00423844	-0.00363838	0.00346613	0.527058	0.315014
SL006923	TBP	P20226	0.00265733	0.00400916	0.61604	0.000447174	0.00366469	0.0034949	0.527253	0.315102
SL018947	USP25	Q9UHP3	0.00678612	0.00398766	0.157715	0.00292266	0.00354983	0.00339381	0.528677	0.315549
SL000299	FGF1	P05230	-0.00556482	0.00400182	0.256838	0.00196128	-0.00351377	0.00338851	0.535246	0.316464
SL004867	CA3	P07451	0.0364368	0.00380374	9.60764e-20	0.0845914	0.00392584	0.00378844	0.535246	0.316808
SL010516	SRC	P12931	-0.0161545	0.00394116	0.000155333	0.0166051	-0.00429479	0.00417308	0.540427	0.318088
SL000268	PLG	P00747	-0.010785	0.00397994	0.016469	0.00737753	-0.00339528	0.00334657	0.551976	0.315857
SL004671	TNFRSF13C	Q96RJ3	-0.0135405	0.00396725	0.00191968	0.0116531	-0.00370471	0.00366343	0.55401	0.316734
SL004805	CADM1	Q9BY67	0.0191061	0.00394021	5.87537e-06	0.0232452	0.00345375	0.00342924	0.556755	0.315344
SL010372	TMPRSS15	P98073	-0.000219397	0.00399485	0.972661	3.05593e-06	-0.00342477	0.00340822	0.55795	0.318425
SL011629	AIP	O00170	-0.000512291	0.00397514	0.928109	1.67084e-05	0.00390961	0.00391072	0.560811	0.316994
SL005165	LGALS4	P56470	0.0086555	0.00396568	0.0611837	0.00476965	0.00360322	0.00360262	0.560811	0.316995
SL005205	NCR3	O14931	0.0113647	0.00396918	0.0107747	0.00821298	0.00338092	0.00339145	0.562462	0.315827
SL007280	CTSC	P53634	0.00844714	0.00397905	0.069135	0.00453161	0.00336485	0.00338849	0.565016	0.317724
SL010616	PTPN11	Q06124	0.00777109	0.00396665	0.096958	0.00384256	0.0037323	0.0037715	0.565571	0.318033
SL012108	PLCG1	P19174	-0.00828463	0.00398163	0.0760783	0.00436724	0.00351886	0.00355749	0.565571	0.314544
SL019100	STUB1	Q9UNE7	0.00681161	0.00396843	0.153335	0.00295227	0.00371636	0.00375842	0.565571	0.318032
SL003918	KLK13	Q9UKR3	0.00468164	0.00397217	0.348363	0.00140687	0.00331369	0.00334473	0.565571	0.315242
SL003793	MAP2K1	Q02750	0.00867399	0.00397178	0.0610809	0.00478012	0.00368959	0.00373542	0.565699	0.318156
SL007229	STAT6	P42226	0.00510249	0.00397747	0.305162	0.00165622	0.00366851	0.00371726	0.565699	0.317937
SL010348	FN1	P02751	-0.000800291	0.00397853	0.886935	4.07459e-05	-0.00324973	0.0032961	0.565756	0.31725
SL009868	SSRP1	Q08945	0.00297071	0.00399173	0.568858	0.000562548	0.00332616	0.00337754	0.56598	0.316747
SL011498	ADCYAP1	P18509	0.00114748	0.00400411	0.832927	8.32849e-05	0.00330596	0.00336528	0.567288	0.317131
SL006108	CD5L	O43866	0.00492636	0.00397374	0.322804	0.00154538	0.0032349	0.00330084	0.568538	0.317019
SL005491	OPCML	Q14982	-0.012244	0.00396408	0.00551968	0.00953507	0.00348125	0.00356712	0.571294	0.316472
SL011232	CDC37	Q16543	0.00524703	0.00397081	0.28673	0.0017518	0.00364943	0.00374297	0.571319	0.318013
SL008904	LYVE1	Q9Y5Y7	0.0119319	0.00398523	0.00744107	0.00903682	0.00328581	0.00338093	0.573266	0.317231
SL013548	IL34	Q6ZMJ4	0.0119113	0.00397886	0.00744107	0.00900728	0.00327351	0.00337961	0.573515	0.316416
SL003200	TEK	Q02763	0.0023229	0.00398331	0.661631	0.000343044	0.00327341	0.00338434	0.573515	0.31684
SL003703	BCL2A1	Q16548	0.0151611	0.00397425	0.000469641	0.0145595	0.00340849	0.00352425	0.573515	0.316884
SL004815	YWHAB	P31946	0.00344599	0.0039728	0.501705	0.000755587	0.00378269	0.0039013	0.573515	0.318006
SL007327	OLR1	P78380	0.0144374	0.00394746	0.000840873	0.0133448	0.00323123	0.00333442	0.573515	0.314504
SL000137	BTC	P35070	0.00422933	0.003997	0.402988	0.00113309	0.00333211	0.00345386	0.573645	0.31689
SL000310	C1R	P00736	0.00347637	0.00398094	0.498938	0.000768129	-0.00320062	0.00331893	0.573645	0.317533
SL010250	STIP1	P31948	0.00427329	0.00397199	0.394426	0.00116193	0.00372758	0.00386227	0.573645	0.318
SL000064	KLK7	P49862	-0.0168631	0.00393139	7.20878e-05	0.0181911	-0.00321223	0.00334391	0.574582	0.317266
SL004605	RPSA	P08865	0.00499602	0.00400161	0.319074	0.0015784	0.00327731	0.00341075	0.574582	0.317591
SL005688	YWHAZ	P63104	0.00107047	0.00397415	0.843466	7.29129e-05	0.00360213	0.00374872	0.574582	0.317994
SL008039	AKR1A1	P14550	0.0106073	0.00396005	0.0179073	0.00715925	0.00365436	0.0038083	0.574725	0.317993
SL000321	C5 C6	P01031,P13671	0.00564735	0.00397474	0.247672	0.00203085	-0.0031933	0.00334132	0.576544	0.316274
SL003753	DYNLL1	P63167	-0.0104335	0.00397108	0.0203379	0.00697352	-0.00319758	0.00334307	0.576544	0.316691
SL000339	CA2	P00918	0.00571805	0.00399188	0.243781	0.00207244	0.0031773	0.00335056	0.582166	0.319749
SL000300	POMC	P01189	-0.00560557	0.00398822	0.251681	0.00199754	-0.00318459	0.0033655	0.582413	0.316349
SL003305	IL2RA	P01589	0.00381642	0.00399211	0.455565	0.000925103	0.0032676	0.00345284	0.582413	0.315522
SL004747	APOM	O95445	0.00465241	0.00398041	0.352875	0.00137528	0.00313084	0.00331351	0.58284	0.317191
SL000047	IGF1	P05019	0.00326873	0.00398875	0.527436	0.00067857	0.00334134	0.00353968	0.582865	0.315699
SL000250	SERPINF2	P08697	-0.0266821	0.00390193	9.22034e-11	0.0451898	-0.00337037	0.00358285	0.583418	0.316416
SL003080	MIF	P14174	0.0105631	0.00396863	0.0185564	0.00709082	0.00364088	0.0038657	0.583418	0.317725
SL008421	ADAMTS1	Q9UHI8	0.00622414	0.00397972	0.198332	0.00245964	0.00331032	0.00351789	0.583418	0.317856
SL010495	CDK2 CCNA2	P24941 P20248	-0.00301497	0.00395192	0.560508	0.000591149	-0.00317623	0.00338195	0.58398	0.321009
SL000398	CYP3A4	P08684	0.00618611	0.00397285	0.200794	0.00243325	0.00361491	0.00385782	0.584309	0.318242
SL004781	CSK	P41240	0.00401278	0.00397226	0.425917	0.00102458	0.00362976	0.00387051	0.584309	0.317964
SL007281	MAPK12	P53778	0.0074149	0.0039682	0.115681	0.00350037	0.0035399	0.00378309	0.584693	0.318157
SL004851	ACVRL1	P37023	0.00723425	0.00395992	0.125525	0.00336662	0.00327135	0.00350351	0.58565	0.317324
SL000104	BCL2	P10415	0.00693522	0.00397837	0.145632	0.00305401	0.00350112	0.00375825	0.586752	0.317561
SL003710	CASP2	P42575	0.00391033	0.00399718	0.443827	0.000969664	0.00328537	0.00354498	0.589399	0.318772
SL004580	MSR1	P21757	-0.00184396	0.00397159	0.728815	0.000217472	0.0032446	0.00349939	0.589399	0.316423
SL000158	FOLH1	Q04609	0.00807762	0.00396666	0.0826237	0.00418389	0.00307036	0.00331703	0.589626	0.318281
SL010381	DKKL1	Q9UK85	-0.0169031	0.00394784	7.44073e-05	0.0181806	0.00338704	0.00367987	0.591114	0.316108
SL012469	GPC5	P78333	-0.0078196	0.0039837	0.0962509	0.0038807	-0.0031375	0.00340552	0.591114	0.317222
SL000527	MMP9	P14780	0.00490896	0.0039633	0.323056	0.00154102	0.00302529	0.00328577	0.591114	0.317742
SL003320	FIGF	O43915	0.00690611	0.00396913	0.146253	0.00303647	0.00311645	0.00337668	0.591114	0.316893
SL008945	TGM3	Q08188	0.00860667	0.00396492	0.0629427	0.00471332	-0.00308124	0.00335321	0.591163	0.31794
SL010456	CST1	P01037	0.0233706	0.00390562	1.66815e-08	0.0347699	0.00318007	0.00346832	0.591163	0.317256
SL003993	BMP6	P22004	0.00895174	0.00397312	0.0525384	0.00509636	-0.0031013	0.00337685	0.591163	0.316516
SL008574	OMD	Q99983	0.020883	0.00392232	5.72423e-07	0.0277271	0.00325519	0.00354728	0.591163	0.317943
SL005236	NOV	P48745	0.00807881	0.0039635	0.0823667	0.00417911	0.00318548	0.00348255	0.592304	0.314423
SL000424	FGA FGB FGG	P02671 P02675 P02679	0.0117577	0.00396558	0.0080661	0.00879269	0.00303406	0.00333373	0.595516	0.315969
SL004070	RPS27A	P62979	0.0104039	0.00397084	0.0206638	0.00690713	0.0031812	0.0035069	0.597351	0.320983
SL009328	CSH1 CSH2	P0DML2 P0DML3	0.00820569	0.00396717	0.0776632	0.00429857	0.00337882	0.00374017	0.59833	0.317523
SL017611	YWHAB,YWHAE,YWHAG,YWHAH,YWHAQ,YWHAZ,SFN	P31946, P62258, P61981, Q04917, P27348, P63104, P31947	0.00474032	0.00397145	0.342405	0.00142979	0.00355004	0.00392329	0.59833	0.317923
SL004716	MAPK9	P45984	-0.000200513	0.00398999	0.973436	2.56392e-06	-0.00304912	0.00337465	0.59833	0.316531
SL000125	IL1A	P01583	0.004289	0.00399843	0.395997	0.0011656	0.0030689	0.00340719	0.599896	0.318568
SL005219	SIGLEC9	Q9Y336	0.00698457	0.00396812	0.141007	0.0031041	0.0029467	0.00328713	0.602852	0.317912
SL014091	SORCS2	Q96PQ0	-0.0246811	0.00392196	2.78207e-09	0.0387651	-0.00315142	0.00351899	0.602877	0.31628
SL005687	EIF5A	P63241	0.00544953	0.00397054	0.263952	0.00188962	0.00343543	0.00384195	0.603296	0.317909
SL011809	DCTPP1	Q9H773	0.0201611	0.00394355	1.63434e-06	0.025798	0.00305924	0.00344137	0.607093	0.318237
SL004872	EDAR	Q9UNE0	-0.00159132	0.00397398	0.765404	0.000161128	-0.00325419	0.00366994	0.607635	0.3179
SL008967	SIRPA	P78324	0.00843709	0.00396529	0.0685249	0.00452941	0.00291878	0.00329211	0.607635	0.3179
SL013989	RSPO2	Q6UXX9	0.00713848	0.00398223	0.13259	0.00323531	0.00317755	0.00358875	0.607908	0.316541
SL006921	PDK1	Q15118	0.00282592	0.00398727	0.588036	0.000507124	0.00306525	0.00348026	0.611223	0.317639
SL001726	CSF2	P04141	0.0132887	0.0039625	0.00233168	0.0112891	0.00292498	0.00334093	0.611356	0.316793
SL005034	RAN	P62826	0.00491138	0.00397125	0.323349	0.00153484	0.00350143	0.00399239	0.611356	0.317889
SL005234	GDF9	O60383	0.0076004	0.0039735	0.106018	0.00367096	0.00300685	0.00343482	0.611356	0.31772
SL006805	CDC42BPB	Q9Y5S2	0.00241932	0.00399856	0.649056	0.000371519	0.00305585	0.00348627	0.611356	0.316549
SL007151	GPD1	P21695	-0.00858396	0.00397561	0.0643823	0.00468698	-0.00294882	0.00336854	0.611356	0.316599
SL011628	DBNL	Q9UJU6	0.00576836	0.00397339	0.237097	0.00211581	0.00322581	0.00368198	0.611356	0.318464
SL004060	ECE1	P42892	0.00165136	0.00396579	0.754984	0.000174933	-0.00290445	0.00333511	0.614238	0.317522
SL007145	NR1D1	P20393	0.00571427	0.00397742	0.242136	0.00207636	0.0029413	0.00337939	0.614238	0.317203
SL007560	STAB2	Q8WWQ8	0.00770544	0.003972	0.100919	0.00377938	0.00320073	0.00369265	0.616612	0.316696
SL004648	TNFSF14	O43557	0.00572	0.00397667	0.241953	0.00208131	0.00301296	0.00347992	0.616703	0.319273
SL000133	CCL20	P78556	0.00441779	0.0039667	0.378988	0.00125386	0.00290665	0.00338802	0.622865	0.320324
SL010494	CDC2 CCNB1	P06493 P14635	0.00387495	0.00397724	0.44557	0.000955005	0.00309937	0.00362554	0.624782	0.317004
SL014093	ENTPD3	O75355	0.00699924	0.00396985	0.140313	0.00312067	0.00299313	0.00351842	0.626923	0.31651
SL000668	CD36	P16671	-0.00352983	0.00397193	0.491084	0.000793911	-0.00313109	0.0036789	0.626923	0.317711
SL010493	CAMK2D	Q13557	0.00687455	0.00397403	0.149232	0.00300751	0.00322212	0.00379185	0.627	0.316479
SL010459	FCGR2A	P12318	0.00638126	0.00396915	0.184276	0.00259101	0.00278481	0.00328885	0.628849	0.317853
SL006698	LCORL	Q8N3X6	-0.00206782	0.00398589	0.698483	0.000272057	-0.00292982	0.00346348	0.628849	0.315724
SL004299	BIRC7	Q96CA5	0.00207192	0.00400109	0.698483	0.000272443	0.00293479	0.00348903	0.632296	0.321342
SL010375	ASAH2	Q9NR71	-0.0141204	0.00396203	0.00115812	0.0126547	-0.00284556	0.00338952	0.632967	0.319844
SL004342	FGF8	P55075	-0.000110615	0.00398639	0.986972	7.79318e-07	0.0028933	0.0034632	0.635807	0.314982
SL000617	GPT	P24298	0.0046855	0.00397554	0.348363	0.00139689	0.00305295	0.00366437	0.636205	0.316662
SL004484	SFTPD	P35247	0.00458294	0.00397552	0.359142	0.00133516	0.0031071	0.00373276	0.636205	0.317817
SL004866	CA1	P00915	-0.000105289	0.00398296	0.987263	7.0443e-07	-0.00280437	0.00336397	0.636205	0.317107
SL000138	HBEGF	Q99075	0.00497742	0.00398967	0.319213	0.00157447	0.00288932	0.00348548	0.637276	0.317547
SL004724	KAT6A	Q92794	0.0120809	0.00395961	0.00622904	0.00931527	0.00285951	0.0034441	0.637276	0.317483
SL004829	S100A7	P31151	0.0105842	0.00397139	0.0184686	0.00713057	0.00275611	0.00332631	0.637276	0.318023
SL000272	SERPINC1	P01008	-0.0162755	0.00395085	0.000143883	0.0168528	-0.00279558	0.00338187	0.637462	0.315852
SL005197	SCARB2	Q14108	0.00407636	0.00398731	0.419813	0.00105461	0.00281676	0.0034066	0.637462	0.317888
SL004626	ADAMTS5	Q9UNA0	0.0364924	0.00381314	1.03878e-19	0.0847579	0.00322385	0.00390824	0.638248	0.314896
SL000528	POR	P16435	-0.00283583	0.00397954	0.585646	0.00051112	0.00298671	0.00364237	0.641048	0.317222
SL004301	XRCC6	P12956	0.00193043	0.00399545	0.717936	0.000236461	0.00284378	0.0034675	0.641048	0.317893
SL014288	CD200R1	Q8TD46	0.000793288	0.00399522	0.886963	3.99434e-05	0.00273822	0.00337435	0.643514	0.316759
SL000076	CDKN1B	P46527	0.00244137	0.00395351	0.641582	0.000386202	0.00279232	0.00342553	0.643514	0.319993
SL000468	IGHM IGJ IGK@ IGL@	P01871	-0.00229663	0.00397735	0.665589	0.000335323	0.00273166	0.00337118	0.643514	0.317716
SL001973	SCGB2A1	O75556	0.00560512	0.00397516	0.251403	0.00199822	0.00289264	0.00355505	0.643514	0.316957
SL003184	LEPR	P48357	0.00322268	0.00397038	0.532096	0.000663029	-0.00267473	0.00329058	0.643514	0.31915
SL003220	C3	P01024	0.00179998	0.00397906	0.737882	0.000206241	0.00267514	0.00329925	0.643514	0.315973
SL004643	ANGPT4	Q9Y264	0.00544587	0.00397143	0.264231	0.00188814	0.00297839	0.00366508	0.643514	0.316754
SL005630	PSMA6	P60900	0.00624977	0.00396936	0.195175	0.00248533	0.00302647	0.00371933	0.643514	0.317815
SL000678	GNLY	P22749	0.0219811	0.00391355	1.26415e-07	0.030761	0.00276179	0.00342232	0.645676	0.316754
SL001791	BGLAP	P02818	-0.00259781	0.0039932	0.62212	0.000430359	0.00270847	0.00336794	0.647399	0.310586
SL000345	CTSG	P08311	0.00412601	0.00397889	0.412581	0.001085	0.0027713	0.00345945	0.647434	0.315959
SL001999	MDM2	Q00987	0.00526439	0.0039695	0.284613	0.00176988	0.0029379	0.00366935	0.647434	0.318047
SL002650	PKM2	P14618	0.00136386	0.00397406	0.799656	0.000118358	0.00316431	0.00396041	0.647434	0.317799
SL003646	TPM4	P67936	-0.00026146	0.00397429	0.967642	4.34977e-06	0.00301615	0.00377117	0.647434	0.3178
SL003849	FGF9	P31371	-0.00367759	0.00399502	0.475102	0.000857828	-0.00268781	0.00335182	0.647434	0.317012
SL004588	IL1RAP	Q9NPH3	-0.00637677	0.00397742	0.185711	0.00258442	-0.0027044	0.00336878	0.647434	0.317037
SL010973	PSMA1	P25786	0.000976063	0.00398963	0.860343	6.04546e-05	-0.00284611	0.00357423	0.649063	0.31822
SL004920	CFL1	P23528	0.00718973	0.00396776	0.128481	0.00328914	0.00294768	0.00371138	0.650123	0.317794
SL005210	NRCAM	Q92823	0.00994964	0.00397727	0.0283354	0.00629426	0.00264921	0.00334546	0.651443	0.314597
SL001995	ANGPT1	Q15389	0.00911232	0.00396378	0.0474066	0.00528341	0.00264379	0.00336265	0.652065	0.317785
SL005217	SIGLEC6	O43699	-0.00222692	0.00398682	0.674579	0.000316332	-0.00261597	0.00332905	0.652065	0.317954
SL005358	PEBP1	P30086	0.00847337	0.00396521	0.0672977	0.00456845	0.00297719	0.00379175	0.652065	0.317784
SL007752	DAPK2	Q9UIK4	0.00488187	0.00397366	0.326784	0.00152381	0.00282036	0.00357164	0.652065	0.314141
SL008063	ACP1	P24666	0.00427659	0.00397198	0.394329	0.00116373	0.00285165	0.00362584	0.652065	0.317785
SL008176	PSME1	Q06323	0.00858535	0.00396896	0.063947	0.0046853	0.00297248	0.0037808	0.652065	0.317869
SL008865	PSMA2	P25787	0.0165465	0.00395125	0.000109125	0.0174226	0.00268796	0.0034062	0.652065	0.315766
SL010517	STK16	O75716	0.00858841	0.00398306	0.0646495	0.00468378	0.00263083	0.00336574	0.65274	0.315355
SL014735	IMPDH1	P20839	0.013421	0.00395592	0.00205765	0.0114812	0.00285337	0.00365795	0.65274	0.316717
SL016550	CSNK2A1 CSNK2B	P68400 P67870	0.00344539	0.0039728	0.501705	0.000755325	0.00301854	0.00386639	0.65274	0.317779
SL000136	AREG	P15514	0.00535536	0.00397067	0.274291	0.00182488	0.00294716	0.00376226	0.652741	0.317782
SL003524	PDIA3	P30101	0.00199391	0.00397379	0.706029	0.000252969	0.00301515	0.00386911	0.652741	0.317777
SL004349	IFNL2	Q8IZJ0	3.35733e-05	0.00400343	0.995512	7.13983e-08	0.00264755	0.00339062	0.652741	0.317637
SL005215	CD33	P20138	0.00904983	0.00397282	0.0495821	0.00520884	-0.00258643	0.00333944	0.656204	0.316867
SL004182	PLA2G5	P39877	0.00388443	0.00397619	0.444266	0.000960183	0.00278876	0.00361485	0.658134	0.318285
SL009988	ADAM12	O43184	0.00541636	0.00398237	0.269027	0.00186503	0.0026262	0.00341703	0.658811	0.316197
SL014092	CDON	Q4KMG0	-0.0283939	0.00386588	3.13994e-12	0.0515754	-0.00271414	0.0035352	0.658811	0.316186
SL000581	SOD1	P00441	0.0104399	0.00396436	0.0200136	0.00692851	0.00274316	0.00358624	0.658811	0.317717
SL001716	IL12A IL12B	P29459, P29460	0.0076392	0.00397981	0.105014	0.00372284	0.00259402	0.00338531	0.658811	0.317232
SL002783	CTF1	Q16619	0.0055869	0.00397361	0.251681	0.00198682	0.00279404	0.00363006	0.658811	0.316295
SL004326	TNFSF18	Q9UNG2	0.00660064	0.00397061	0.167827	0.00278644	0.00259405	0.00339207	0.658811	0.317158
SL005588	FER	P16591	0.00227083	0.00397365	0.66792	0.000328114	0.00293211	0.00382638	0.658811	0.317764
SL016567	MAP3K7 TAB1	O43318 Q15750	0.00253639	0.00398101	0.630291	0.000410686	0.00267919	0.00354631	0.664463	0.316087
SL000027	PTGS2	P35354	-0.00108803	0.00399114	0.842678	7.51375e-05	-0.00262785	0.00348048	0.664463	0.315803
SL000057	TK1	P04183	0.0066391	0.00399495	0.167827	0.00279888	0.00256211	0.00339221	0.664463	0.314931
SL001721	PECAM1	P16284	0.0072206	0.0039759	0.127822	0.0033171	0.00264714	0.00351249	0.664463	0.316361
SL004457	SERPINE2	P07093	-0.000393857	0.00396963	0.9457	9.90345e-06	-0.00255667	0.00339426	0.664463	0.316767
SL005793	PPIF	P30405	-0.000251805	0.00397429	0.968856	4.03444e-06	0.00282911	0.00374866	0.664463	0.317751
SL004331	CNTF	P26441	-0.00213622	0.00398731	0.687959	0.00028985	-0.00254081	0.00339224	0.667452	0.317155
SL005174	IL17RB	Q9NRM6	0.00533151	0.00398156	0.278794	0.00180972	0.00248461	0.00333025	0.669299	0.316385
SL010471	SPOCK2	Q92563	-0.0147677	0.0039613	0.000650357	0.0138439	-0.00249163	0.00335604	0.671216	0.316922
SL014048	COL23A1	Q86Y22	0.00291298	0.00397322	0.576115	0.000539923	0.00287008	0.00387141	0.671216	0.317738
SL007806	IL22RA1	Q8N6P7	0.00612712	0.00399185	0.207643	0.00238853	0.00254911	0.00343586	0.671216	0.315819
SL004125	INSR	P06213	0.0059795	0.0039742	0.217791	0.00227682	-0.00246339	0.00334199	0.673476	0.315572
SL010521	BTK	Q06187	0.000881725	0.0039742	0.875617	4.94678e-05	0.00284789	0.00386326	0.673476	0.317733
SL000556	PRKCG	P05129	0.0107328	0.00398879	0.0173149	0.00728935	0.00251919	0.00343285	0.675012	0.318587
SL006920	MAPK14	Q16539	0.00418402	0.00397208	0.40415	0.00111389	0.00285346	0.00388931	0.675012	0.31773
SL003043	TIMP3	P35625	0.00736712	0.00396743	0.118413	0.00345344	0.00251047	0.00342795	0.675423	0.317729
SL004636	FLT3	P36888	0.00382481	0.00397245	0.451871	0.000930843	0.00289894	0.00397748	0.677789	0.317725
SL005225	NTRK1	P04629	-0.000992014	0.00396019	0.856222	6.35709e-05	0.00258174	0.00354994	0.678434	0.316609
SL017614	AKT1 AKT2 AKT3	P31749 P31751 Q9Y243	0.00450465	0.00397173	0.368225	0.00129115	0.00277415	0.00383003	0.680296	0.317721
SL007003	DHH	O43323	0.00564868	0.00397371	0.247672	0.00202877	0.00270631	0.00376432	0.684327	0.317732
SL010503	MAPKAPK2	P49137	0.00400971	0.00397226	0.425976	0.00102301	0.00282817	0.00393953	0.684496	0.317714
SL004009	RAC1	P63000	0.00268893	0.00397338	0.608677	0.000460059	0.00278096	0.00390031	0.688096	0.317709
SL004157	TNFRSF10B	O14763	0.00876388	0.00398126	0.0591187	0.00487075	0.00247716	0.00348918	0.690063	0.318208
SL002075	IFNA2	P01563	0.00531418	0.00397993	0.280376	0.00180493	0.00240463	0.00339277	0.690377	0.316761
SL000655	KRT18	P05783	0.00649928	0.00396695	0.174955	0.002704	0.00253779	0.00358909	0.691102	0.317366
SL010371	ENTPD1	P49961	0.00848543	0.00394952	0.0656012	0.00464093	0.00238793	0.00340109	0.694026	0.318754
SL004365	TNFSF12	O43508	0.00220357	0.0039687	0.676027	0.000312252	0.00238725	0.00339971	0.694026	0.317489
SL000553	PRKCB	P05771	4.45978e-05	0.0039743	0.994872	1.26556e-07	0.00269057	0.00383838	0.694282	0.317698
SL000541	PLG	P00747	-0.0111548	0.0039645	0.0123777	0.00791735	-0.00234259	0.00334962	0.694953	0.316402
SL003700	BAD	Q92934	0.003792	0.00397248	0.456058	0.000914943	0.00265494	0.00383093	0.699868	0.31769
SL000437	HP	P00738	0.0133022	0.00396123	0.00230456	0.0113076	0.0023054	0.00333959	0.701529	0.317423
SL005266	SNCA	P37840	0.00351438	0.00397274	0.492879	0.000785873	0.0025835	0.00374915	0.701866	0.317686
SL004359	NTF3	P20783	-0.00178528	0.00398686	0.739044	0.00020291	0.00231335	0.00337564	0.704499	0.317571
SL010349	FN1	P02751	-0.000761337	0.00397545	0.889602	3.68959e-05	-0.00223679	0.00328943	0.705628	0.317479
SL011073	XPNPEP1	Q9NQW7	0.00307063	0.00397311	0.554965	0.000599947	0.0025776	0.00379193	0.705628	0.317678
SL017424	C10orf54	Q9H7M9	0.00650135	0.00397502	0.175731	0.00268935	0.00253298	0.00371444	0.705628	0.315895
SL000089	TGFB3	P10600	0.0117307	0.00397416	0.00838262	0.00873275	0.00236088	0.00346504	0.705628	0.316701
SL005685	EEF1B2	P24534	0.0061304	0.00396954	0.204594	0.0023913	0.00249302	0.00366625	0.705628	0.317678
SL000507	LTA LTB	P01374, Q06643	-0.0156933	0.00395367	0.000261936	0.0157278	-0.00243819	0.00360005	0.707104	0.318791
SL011211	EIF4G2	P78344	0.00125408	0.0039741	0.813693	0.00010007	0.00255449	0.00378603	0.708625	0.317673
SL011709	PDXP	Q96GD0	0.00373959	0.00397253	0.462686	0.000889824	0.0025323	0.00376489	0.709018	0.317671
SL000358	F7	P08709	0.00155522	0.00398075	0.772733	0.000153998	-0.00224528	0.00333839	0.709018	0.314813
SL003717	CASP10	Q92851	0.00808743	0.00398175	0.0832921	0.0041666	0.00245021	0.00366521	0.711904	0.315751
SL011772	PES1	O00541	0.00564565	0.00397784	0.248024	0.00203671	0.00228094	0.00343471	0.713646	0.315102
SL004334	FGF16	O43320	0.00408049	0.00397219	0.417068	0.00105945	0.00251503	0.00378773	0.713646	0.317663
SL007228	PRKCI	P41743	0.00406559	0.00398001	0.419908	0.00104972	0.00248326	0.00373054	0.713646	0.318122
SL010504	MAPKAPK5	Q8IW41	0.00487305	0.00398476	0.329186	0.00150989	0.00225644	0.00340286	0.713679	0.314831
SL005574	ACY1	Q03154	-0.00329839	0.00398562	0.523624	0.000692714	0.00225337	0.00341285	0.715467	0.318067
SL000006	SERPINE1	P05121	0.00431166	0.00397592	0.39161	0.00118172	0.00222577	0.00338214	0.716645	0.31781
SL004645	SPINT1	O43278	-0.0163211	0.00397034	0.000148227	0.0169002	0.00225811	0.00343598	0.716686	0.316706
SL010512	PIK3CA PIK3R1	P42336 P27986	-0.00241352	0.00397704	0.648213	0.000371866	-0.00231188	0.00352646	0.717366	0.321093
SL000084	EGF	P01133	-0.000228188	0.00397223	0.971374	3.31993e-06	0.00241871	0.00369952	0.718205	0.317371
SL012707	PCSK9	Q8NBP7	0.00719849	0.00397496	0.128481	0.00329513	-0.00220087	0.00337415	0.718801	0.316333
SL011630	SEZ6L2	Q6UXD5	0.003005	0.00397315	0.562474	0.000574572	0.00236976	0.0036606	0.719991	0.317648
SL003104	CCL24	O00175	0.00443705	0.00397359	0.377622	0.00126426	0.00218542	0.00337213	0.719991	0.312069
SL003711	CASP3	P42574	-0.000509473	0.00397426	0.928109	1.65157e-05	0.00243706	0.00376437	0.719991	0.317648
SL004306	UBE2I	P63279	0.00461727	0.0039716	0.355358	0.00135652	0.00248564	0.00384705	0.719991	0.317647
SL005493	PON1	P27169	0.000718235	0.00398473	0.894107	3.28159e-05	-0.00227209	0.00350451	0.719991	0.317653
SL008378	EIF4EBP2	Q13542	-7.04617e-05	0.00397827	0.991597	3.15597e-07	-0.00221094	0.0034235	0.719991	0.317825
SL010463	GPC2	Q8N158	-0.000563121	0.00398659	0.920235	2.0215e-05	-0.00215599	0.0033628	0.721403	0.315846
SL003173	CXCL1	P09341	0.00858183	0.00396596	0.0639299	0.00468852	0.00232514	0.00362779	0.721403	0.31707
SL003362	C3	P01024	0.00461042	0.00397769	0.357024	0.00135245	0.00212878	0.00331091	0.721403	0.316587
SL007070	LDLR	P01130	0.00147194	0.00399001	0.783534	0.000138006	0.00215701	0.00336597	0.721403	0.316438
SL010617	TPSB2	P20231	0.0142903	0.00394924	0.000959537	0.0130013	0.00214014	0.00334985	0.722387	0.316587
SL000582	BIRC5	O15392	0.000731662	0.00397598	0.89316	3.4239e-05	0.00220804	0.00347168	0.724194	0.314953
SL000481	IL5	P05113	0.000858626	0.00399643	0.878421	4.69557e-05	0.00211217	0.00333666	0.725351	0.317547
SL004148	IL12RB1	P42701	-0.00116232	0.00398093	0.829677	8.63636e-05	0.00214416	0.0033837	0.725351	0.31312
SL006091	NCK1	P16333	0.00765085	0.00397409	0.103798	0.00371858	0.00221949	0.00351464	0.725948	0.317584
SL002542	KRAS	P01116	0.00243231	0.00398607	0.646169	0.000377109	0.00212167	0.00336467	0.726013	0.314365
SL009216	DDC	P20711	-0.00588674	0.00398814	0.228362	0.00220482	-0.00216001	0.00344691	0.728771	0.314458
SL004687	TSLP	Q969D9	0.00464473	0.00398532	0.35406	0.00136876	0.00223354	0.00361507	0.735938	0.317627
SL000384	CTLA4	P16410	0.00221839	0.00401283	0.677348	0.000311437	0.00203559	0.00332884	0.739344	0.316553
SL000551	PRKCA	P17252	-0.000650459	0.00397424	0.904076	2.69213e-05	0.00232751	0.0037968	0.739344	0.317618
SL004752	FAM107A	O95990	0.00609768	0.00398018	0.208291	0.00236516	0.0021319	0.00348468	0.739344	0.316233
SL000337	CAPN1 CAPNS1	P07384 P04632	0.00167204	0.00397394	0.754007	0.000177889	0.00235494	0.00386082	0.739958	0.317616
SL004305	TOP1	P11387	0.0020319	0.00398336	0.701181	0.00026463	0.00205144	0.00337071	0.740405	0.314749
SL004625	ADAMTS4	O75173	0.0092115	0.00398631	0.0461057	0.00539181	0.00204826	0.00340539	0.745343	0.316843
SL005629	NAGK	Q9UJ70	0.00928192	0.00397228	0.0431209	0.00547944	-0.00219912	0.00365649	0.745343	0.315625
SL008956	ARSB	P15848	-0.00336902	0.00399232	0.514398	0.000723914	0.00196388	0.00333769	0.745633	0.319258
SL010830	EPB41	P11171	-0.00429959	0.00397196	0.391982	0.00117628	-0.00215599	0.00364464	0.745633	0.3176
SL013490	BOC	Q9BWV1	-0.00504071	0.0039865	0.311914	0.00161563	0.00197747	0.00333368	0.745633	0.316926
SL016555	PDE11A	Q9HCR9	-0.000456228	0.00397427	0.936443	1.3244e-05	0.0023075	0.00392752	0.745633	0.317597
SL018971	ZNRF3	Q9ULT6	0.0109473	0.00396913	0.0144816	0.00767922	0.00197739	0.00334582	0.745633	0.313236
SL000088	TGFB2	P61812	0.00273808	0.00398642	0.602001	0.000475825	0.00207732	0.00352149	0.745633	0.317233
SL000131	PCNA	P12004	0.00119042	0.00399843	0.825632	8.97974e-05	0.00200088	0.00340035	0.745633	0.317588
SL000622	F5	P12259	0.00848294	0.00397419	0.067599	0.00457646	0.00215053	0.00359853	0.745633	0.315823
SL002541	TNFSF11	O14788	0.00191998	0.00395585	0.71679	0.000240315	-0.00195434	0.00329613	0.745633	0.317475
SL003658	AKR7A2	O43488	0.000576729	0.00397426	0.917805	2.11641e-05	0.00233384	0.00397519	0.745633	0.317597
SL003803	ERBB4	Q15303	-0.00653306	0.00397435	0.17347	0.00273574	-0.00208806	0.00350043	0.745633	0.31376
SL004081	DCN	P07585	0.0112111	0.00395923	0.011775	0.00800203	0.0019951	0.00340645	0.745633	0.316542
SL004336	FGF18	O76093	0.00222124	0.0039719	0.674579	0.000317409	0.00200292	0.00337809	0.745633	0.318185
SL004901	P4HB	P07237	0.0031546	0.00397654	0.542454	0.000639154	0.00196554	0.00331796	0.745633	0.315743
SL005694	PRDX6	P30041	0.00352839	0.00397272	0.491084	0.000792153	0.00234269	0.00391907	0.745633	0.317605
SL006480	PRSS3	P35030	-0.00497702	0.00398118	0.318542	0.00157773	-0.00204063	0.00342271	0.745633	0.313994
SL006892	ABL1	P00519	-0.000240172	0.00397989	0.970496	3.70843e-06	-0.00199302	0.00339257	0.745633	0.316991
SL008590	OLFM4	Q6UX06	0.000390319	0.0039938	0.945975	9.65753e-06	-0.00200566	0.00342015	0.745633	0.31812
SL000498	LEP	P41159	0.00332493	0.0039729	0.518402	0.000703432	0.0024186	0.00414192	0.74644	0.317594
SL006189	KIF23	Q02241	0.00559538	0.00395719	0.250174	0.00200737	0.00212139	0.0036523	0.748453	0.319732
SL004649	TNFSF4	P23510	0.00561369	0.00399218	0.251681	0.00199734	0.00194362	0.00335398	0.74889	0.321865
SL011529	SBDS	Q9Y3A5	0.0020389	0.00397377	0.700631	0.000264513	0.00222178	0.00386591	0.752422	0.317587
SL000440	HPX	P02790	0.00620936	0.00396942	0.198332	0.00245329	-0.00188397	0.00330428	0.754249	0.317583
SL004637	MST1R	Q04912	-0.00161964	0.00397417	0.76025	0.000167739	0.00194453	0.00340709	0.754249	0.315715
SL011631	NACA	Q13765	0.00286581	0.00397326	0.582925	0.000522578	0.00219276	0.00384618	0.754249	0.317583
SL000480	IL4	P05112	0.00271941	0.00398511	0.604873	0.000469669	0.00203901	0.00362587	0.756008	0.317101
SL001938	INHBA	P08476	0.0279511	0.00388268	8.4252e-12	0.0496963	0.00200224	0.00356702	0.756008	0.315976
SL003041	PF4	P02776	-0.00135255	0.00397746	0.799656	0.000116321	-0.00195688	0.00345953	0.756008	0.317858
SL004136	TYRO3	Q06418	0.00195976	0.00398021	0.712015	0.000245817	0.00191285	0.00337945	0.756008	0.313921
SL004360	NTF4	P34130	-0.0001524	0.00399456	0.980894	1.48225e-06	0.00188382	0.00335485	0.756008	0.313565
SL005206	NCR2	O95944	0.00419119	0.00398356	0.404236	0.00111689	0.00202584	0.00360534	0.756008	0.316091
SL011549	ARID3A	Q99856	0.00418233	0.00397209	0.40415	0.001113	0.00203492	0.00362093	0.756008	0.317577
SL018256	CHKB	Q9Y259	-0.0245592	0.00390002	2.71081e-09	0.0383636	0.00224279	0.00397072	0.756008	0.317665
SL008773	CD109	Q6YHK3	0.0132876	0.00395334	0.00228451	0.0112937	0.00188444	0.0033748	0.757878	0.315646
SL014071	FLRT1	Q9NZU1	0.00605542	0.0039733	0.211033	0.00233123	0.00209441	0.00378081	0.75966	0.317546
SL003650	ENO1	P06733	-0.00096877	0.00397418	0.860367	5.9717e-05	0.00235174	0.00423374	0.75966	0.317572
SL003862	CD40LG	P29965	-0.00173205	0.0039712	0.746092	0.000191727	-0.00194761	0.00351659	0.75966	0.316737
SL004921	NME2	P22392	-0.00147996	0.00397402	0.782439	0.000139366	0.00210948	0.00382443	0.760914	0.317569
SL000524	MMP3	P08254	0.00150715	0.00399095	0.780134	0.000144178	-0.00184053	0.00335271	0.762493	0.315909
SL000409	MAPK3	P27361	0.00523267	0.00397083	0.288248	0.00174222	0.00211429	0.00387183	0.764326	0.317565
SL005403	LMAN2	Q12907	-0.0215481	0.00392928	2.52662e-07	0.02954	0.00194239	0.00360387	0.769935	0.314724
SL000460	IGHD IGK@ IGL@	P01880	-0.00868798	0.00396474	0.0601408	0.0048028	0.00178201	0.00332091	0.770523	0.317558
SL003785	GAPDH	P04406	0.00775999	0.00396668	0.0974498	0.00383158	0.00197294	0.00367328	0.770523	0.317558
SL003974	PROC	P04070	-0.00163238	0.00397	0.758579	0.000170919	-0.00183312	0.00342509	0.77101	0.314844
SL000601	TF	P02787	-0.0044257	0.0039835	0.37899	0.001244	0.00176531	0.00332171	0.77362	0.316921
SL008760	SLITRK1	Q96PX8	-0.000125622	0.00398488	0.985416	1.00587e-06	0.00186534	0.00353149	0.775767	0.314444
SL003930	HPGD	P15428	0.00668448	0.00398503	0.16355	0.00283689	0.00184397	0.00349975	0.77618	0.316851
SL004415	ACE2	Q9BYF1	0.00420439	0.00397352	0.402988	0.00112847	0.0018767	0.00357189	0.776736	0.316454
SL011768	NUDCD3	Q8IVD9	0.00964028	0.00397021	0.0342619	0.00592022	0.00187554	0.00360391	0.780455	0.317712
SL004919	PRDX1	Q06830	0.00617271	0.00396948	0.201352	0.00242442	0.00191014	0.00368873	0.782011	0.317544
SL003738	CD80	P33681	0.000794057	0.00398095	0.886935	4.03493e-05	0.00176762	0.00342048	0.782188	0.315836
SL004160	NTRK2	Q16620	0.00877206	0.00395516	0.0570422	0.00493417	-0.0017419	0.00340221	0.785243	0.316379
SL005227	ULBP1	Q9BZM6	0.00433967	0.00398823	0.391018	0.00119816	0.00171619	0.00335413	0.785243	0.318553
SL010393	KREMEN2	Q8NCW0	0.0046946	0.00397151	0.34751	0.00140234	0.00189816	0.0037351	0.787594	0.317537
SL008023	HAPLN1	P10915	0.00579025	0.00399923	0.23827	0.00212364	0.00172747	0.00340737	0.787912	0.315433
SL000280	GOT1	P17174	0.00592247	0.00397886	0.224102	0.00222847	-0.00167563	0.00332902	0.79042	0.317368
SL006998	PDPK1	O15530	-0.00431606	0.00397194	0.39109	0.00118531	-0.00192088	0.00383199	0.791502	0.317533
SL000342	CAT	P04040	0.00452281	0.00399177	0.36851	0.00129767	-0.00174115	0.00350346	0.793819	0.316271
SL000357	F9	P00740	0.0164458	0.00394481	0.000117627	0.017236	0.0016736	0.00336449	0.793819	0.316574
SL004332	PROK1	P58294	-0.000200243	0.00398842	0.973436	2.55126e-06	-0.00170126	0.00344346	0.794181	0.317087
SL007774	JAG2	Q9Y219	0.00342643	0.00399097	0.505901	0.00074625	0.00166298	0.00336646	0.794181	0.319317
SL008644	BST1	Q10588	-0.00738144	0.00399002	0.1201	0.00349431	0.00168216	0.00340062	0.794181	0.315159
SL010518	TEC	P42680	-0.00353699	0.00397271	0.490844	0.000796018	-0.00186596	0.0038215	0.798551	0.317524
SL012754	SMPDL3A	Q92484	-0.00751459	0.00397893	0.111051	0.00358988	0.00173266	0.0035659	0.799921	0.315331
SL009768	CBX5	P45973	0.00309741	0.00399803	0.554262	0.000608365	0.00164278	0.00340581	0.801562	0.316697
SL000615	VIP	P01282	0.0060883	0.00397333	0.208291	0.00235652	0.00177648	0.00367942	0.801562	0.318115
SL000426	FN1	P02751	-0.0021176	0.00397713	0.690003	0.000285127	-0.00158572	0.00330016	0.80245	0.317797
SL000674	FST	P19883	0.00575979	0.00397097	0.237375	0.0021121	0.0017519	0.00365854	0.802941	0.316464
SL004119	DDR1	Q08345	0.00579451	0.00398281	0.235993	0.00214647	0.00165032	0.00345097	0.802941	0.316628
SL016549	PRKAA2 PRKAB2 PRKAG1	P54646 O43741 P54619	-0.00205255	0.00397376	0.698483	0.000268067	-0.00179907	0.00379723	0.804593	0.317514
SL000448	HSPB1	P04792	-0.00126583	0.00397409	0.811942	0.000101954	0.00181924	0.00383717	0.804593	0.317514
SL002705	THBS1	P07996	0.00458383	0.00397164	0.358741	0.00133694	0.0015804	0.00333504	0.804593	0.317514
SL010498	EPHA3	P29320	0.000849573	0.00398349	0.878421	4.62701e-05	0.00157499	0.00334367	0.805935	0.315765
SL000007	ESR1	P03372	0.00319695	0.00397387	0.53632	0.00065266	0.00164179	0.00348901	0.805935	0.317502
SL005185	IL23R	Q5VWK5	-0.00200646	0.00397466	0.704816	0.000256308	0.00167543	0.00357202	0.806523	0.316457
SL000130	CCNB1	P14635	0.00549838	0.00395926	0.257127	0.00195019	0.00156029	0.00336324	0.809573	0.319364
SL010927	KPNB1	Q14974	-0.00195719	0.0039778	0.712015	0.000243494	0.0017465	0.003762	0.809573	0.317592
SL010384	SPOCK1	Q08629	0.00751301	0.00397205	0.110487	0.00359354	0.00167884	0.00366935	0.814561	0.31529
SL017188	GSK3A GSK3B	P49840 P49841	-0.000385095	0.00397428	0.945975	9.43606e-06	0.00179613	0.0039632	0.816336	0.317501
SL005187	IL3RA	P26951	0.00434277	0.00397683	0.389327	0.00120067	0.00167957	0.00370807	0.816336	0.317813
SL008157	UBE2L3	P68036	0.00344134	0.0039728	0.50193	0.00075355	0.0017053	0.00376304	0.816336	0.317501
SL010379	SEMA3A	Q14563	-0.00142641	0.00397889	0.789859	0.000129407	0.00160487	0.00356344	0.816804	0.316503
SL000598	THPO	P40225	0.00754377	0.0039671	0.108286	0.00362103	0.00160847	0.00360507	0.816804	0.317497
SL002731	FAS	P25445	0.0327702	0.00384577	5.52625e-16	0.0682668	0.00164323	0.00368007	0.816804	0.316531
SL003655	TKT	P29401	0.00128046	0.00397409	0.81189	0.000104325	0.00171987	0.00386637	0.816804	0.317496
SL004131	CD86	P42081	-0.00250691	0.00399514	0.636679	0.000400391	0.00149653	0.00335522	0.816804	0.3176
SL004750	DDX19B	Q9UMR2	0.0019089	0.00397384	0.719566	0.000231858	0.00172145	0.00386378	0.816804	0.317496
SL005158	CLEC4M	Q9H2X3	0.0159187	0.0039583	0.000212978	0.0160899	0.00156467	0.00347663	0.816804	0.316005
SL005372	SNX4	O95219	0.00165467	0.00397395	0.754984	0.000174212	0.00172046	0.00384075	0.816804	0.317498
SL007121	CTSE	P14091	-0.00169331	0.00397944	0.751413	0.000183601	-0.00149446	0.00336136	0.816804	0.316031
SL011533	SGTA	O43765	-0.0106545	0.00395992	0.0173149	0.00722309	-0.00173847	0.00394278	0.819195	0.317493
SL001998	TFPI	P10646	0.0237571	0.00389048	8.30104e-09	0.0362985	0.00152753	0.0034728	0.819195	0.31645
SL007324	CSNK2A1	P68400	0.00347255	0.00397442	0.498938	0.000768185	0.00160807	0.0036603	0.819195	0.316562
SL004304	STX1A	Q16623	-0.0045916	0.00397457	0.358741	0.00134762	0.00154249	0.003545	0.819856	0.316821
SL004757	VTA1	Q9NP79	0.00153434	0.003974	0.775841	0.000149795	0.0016979	0.00389203	0.819856	0.317491
SL010510	PAK7	Q9P286	0.00143276	0.00397404	0.788863	0.000130619	-0.00159172	0.00365159	0.819856	0.31749
SL016128	TXNDC12	O95881	0.0151511	0.0039509	0.000437705	0.0146081	-0.00149061	0.0034112	0.819856	0.31537
SL004097	SMAD3	P84022	-0.000151577	0.00397429	0.980894	1.46191e-06	0.00170065	0.00393162	0.821196	0.317488
SL007531	BMPER	Q8N8U9	0.000456549	0.00399733	0.936444	1.32164e-05	-0.00146488	0.00339183	0.821196	0.318101
SL011202	NAPA	P54920	0.000950935	0.00397418	0.863365	5.75384e-05	0.00165581	0.00385699	0.821346	0.317487
SL017128	LRRK2	Q5S007	0.00471461	0.00398361	0.347072	0.00141568	0.00151125	0.0035085	0.821346	0.314624
SL003334	AIMP1	Q12904	0.00243539	0.00398304	0.645784	0.000377493	0.00156202	0.00364279	0.821347	0.31778
SL005224	MPL	P40238	-0.00088402	0.00394425	0.874458	5.05853e-05	-0.001515	0.00353771	0.821347	0.318181
SL010928	IMPDH2	P12268	0.00787244	0.00396959	0.0923334	0.00394117	0.00159992	0.00375039	0.821354	0.317362
SL016563	SLC25A18	Q9H1K4	0.00354711	0.00399506	0.491084	0.000798068	0.00142273	0.00337003	0.821354	0.317303
SL004795	HSD17B10	Q99714	0.00247204	0.00397352	0.638543	0.000388836	0.00162632	0.00384512	0.821354	0.317483
SL004868	CA7	P43166	-0.00406394	0.0039923	0.421774	0.00105088	-0.00144454	0.00341062	0.821354	0.318138
SL005575	FUT3	P21217	0.00289342	0.00399032	0.581117	0.000531887	0.00140189	0.00330922	0.821354	0.316743
SL006088	SPHK1	Q9NYA1	0.00065746	0.00397424	0.904076	2.7504e-05	0.00165885	0.00389624	0.821354	0.317484
SL006448	HRG	P04196	0.00574084	0.00398091	0.240568	0.00209412	0.00140539	0.00331145	0.821354	0.31594
SL000517	CCL13	Q99616	-3.00823e-05	0.00398727	0.995512	5.7612e-08	-0.00144795	0.00344639	0.822395	0.315823
SL000009	ERBB2	P04626	0.00391257	0.00398743	0.443238	0.000975523	0.00139066	0.00334983	0.826071	0.315618
SL000483	IL7	P13232	0.00321864	0.00397958	0.533691	0.000660312	0.00141866	0.0034248	0.82611	0.316584
SL009628	ING1	Q9UK53	0.00252421	0.00397349	0.631163	0.000405422	0.00160592	0.00391245	0.827587	0.317476
SL003307	IL2RG	P31785	0.00418906	0.00397208	0.403935	0.00111658	0.0015583	0.00379252	0.827587	0.317476
SL004811	TAGLN2	P37802	0.00265007	0.00397341	0.614058	0.00044686	0.00160422	0.0039213	0.827587	0.317475
SL005258	PLK1	P53350	-0.000515113	0.00397584	0.928109	1.69896e-05	-0.00136639	0.00333993	0.827587	0.315959
SL003674	BCL2L1	Q07817	0.00284771	0.00397327	0.585286	0.000515997	0.00153546	0.00383953	0.831096	0.31747
SL004335	FGF17	O60258	-0.000761049	0.00399424	0.889602	3.68184e-05	-0.00137287	0.00341413	0.831096	0.316333
SL004812	TPI1	P60174	0.00127917	0.00397409	0.81189	0.000104115	0.00154931	0.00388219	0.831096	0.317469
SL005177	IL36A	Q9UHA7	0.00880178	0.00396449	0.0568023	0.00492944	-0.00133003	0.00332563	0.831096	0.31747
SL006918	MAPK1	P28482	0.00350554	0.00397274	0.493954	0.000781929	0.00152293	0.0037844	0.831096	0.317471
SL007237	MAP2K4	P45985	0.00668082	0.00397352	0.162865	0.00283874	-0.00133481	0.00331095	0.831096	0.316553
SL010613	IL17RD	Q8NFM7	0.00237324	0.00399633	0.654342	0.000357543	0.00135899	0.00338719	0.831097	0.315608
SL004915	CLIC1	O00299	-0.00288186	0.00397325	0.581117	0.000528447	0.00158698	0.00398877	0.831408	0.317469
SL004068	GZMB	P10144	0.00303696	0.00399014	0.560508	0.000585991	0.0013326	0.00339956	0.835077	0.317463
SL005226	CRLF2	Q9HC73	0.00502171	0.00397198	0.311914	0.00160548	0.00144848	0.00369039	0.835077	0.316412
SL010523	HIPK3	Q9H422	0.000215664	0.0040005	0.972719	2.94746e-06	-0.00129461	0.00331068	0.83515	0.316225
SL005392	ARSA	P15289	0.00477312	0.00396218	0.336462	0.00146227	-0.00133671	0.00343277	0.835836	0.317595
SL000539	GPI	P06744	0.00356939	0.00397269	0.486092	0.000810669	0.00148373	0.00383102	0.836085	0.317463
SL003169	CXCL5	P42830	0.002173	0.00398093	0.680484	0.000300876	0.00134661	0.00350763	0.836085	0.315702
SL003657	PPP3CA PPP3R1	Q08209 P63098	0.00410378	0.00397217	0.414606	0.00107158	0.00153732	0.00399974	0.836085	0.317461
SL004340	FGF6	P10767	0.00379175	0.00397883	0.456664	0.000913742	0.00140659	0.00363076	0.836085	0.317154
SL004683	NOG	Q13253	-0.00186493	0.0039784	0.726448	0.000221687	0.00135552	0.0035179	0.836085	0.315237
SL011400	PDE1A	P54750	-8.60542e-05	0.00398541	0.989623	4.69988e-07	-0.00136873	0.0035592	0.836085	0.318143
SL006917	LYN	P07948	-0.00197103	0.00397381	0.710052	0.000247197	0.00142113	0.00371847	0.836844	0.31746
SL014108	LRRTM3	Q86VH5	0.000273032	0.00398773	0.966982	4.77865e-06	0.00126617	0.00333512	0.838319	0.314327
SL002621	MDK	P21741	0.0117121	0.00393822	0.00786612	0.00885473	0.00148836	0.00393188	0.83853	0.318128
SL000456	C3	P01024	-0.00229085	0.0039745	0.665815	0.000334116	-0.00125402	0.00334503	0.840217	0.316402
SL006268	NSFL1C	Q9UNZ2	0.000755553	0.00397422	0.889602	3.63233e-05	0.00133261	0.00355329	0.840217	0.317456
SL008143	UBE2N	P61088	0.00205783	0.00397376	0.698483	0.000269449	0.00142773	0.00384197	0.840808	0.317455
SL010491	CAMK2A	Q9UQM7	0.00388781	0.00397239	0.443827	0.000961761	0.00136912	0.00368334	0.840808	0.317455
SL011808	CPNE1	Q99829	0.00172589	0.00397392	0.746178	0.000189532	0.00139437	0.00375095	0.840808	0.317455
SL003178	ICAM3	P32942	0.00263519	0.00398799	0.6168	0.000442634	0.00126787	0.00344737	0.841912	0.311382
SL004589	AZU1	P20160	0.00262648	0.00397739	0.6168	0.000438507	0.00134761	0.00366442	0.841912	0.317647
SL008639	IDS	P22304	0.0143643	0.00394853	0.000895397	0.0131916	0.0012367	0.00335575	0.841912	0.316294
SL000470	IL11	P20809	0.00316576	0.00398275	0.542356	0.000639079	0.00128972	0.00352614	0.842306	0.31943
SL004723	HDAC8	Q9BY41	0.00284689	0.00397793	0.585528	0.000515529	0.00138632	0.00379219	0.842306	0.316387
SL004489	TLR4	O00206	0.00565065	0.00400562	0.251403	0.00202858	0.00121266	0.00332717	0.842512	0.319356
SL000139	EREG	O14944	0.000865152	0.00397908	0.877139	4.76047e-05	0.00121956	0.00342832	0.842542	0.316491
SL000508	LTA LTB	P01374, Q06643	-0.00412773	0.00397416	0.411949	0.00108849	0.00121612	0.00342657	0.842542	0.316163
SL000540	PLG	P00747	0.003486	0.0039911	0.498938	0.000771571	0.00123609	0.003423	0.842542	0.31533
SL006911	CHEK1	O14757	0.0038301	0.00398832	0.4531	0.000936349	0.00122009	0.00341867	0.842542	0.314145
SL006919	RPS6KA5	O75582	0.00367595	0.00397259	0.473237	0.000859797	0.00132107	0.00370164	0.842542	0.317447
SL007336	SET	Q01105	-0.00487313	0.00397399	0.327694	0.00151506	0.00119659	0.0033696	0.842542	0.315668
SL008623	CNTN2	Q02246	0.0153162	0.00395575	0.000382903	0.0149022	-0.00123182	0.00342862	0.842542	0.317331
SL008936	CHL1	O00533	0.0128466	0.00395423	0.00329427	0.010507	0.00119259	0.00335637	0.842542	0.316393
SL011404	PDE4D	Q08499	0.00705413	0.00400947	0.141063	0.00314541	-0.00122297	0.0034286	0.842542	0.316647
SL014029	SPHK2	Q9NRA0	0.00203358	0.00398486	0.701181	0.000263259	0.00125079	0.00351957	0.842542	0.315447
SL019979	HIST3H2A	Q7L7L0	0.00831404	0.00398921	0.0755647	0.00438154	0.00122815	0.00339512	0.842542	0.315682
SL007640	CLEC7A	Q9BXN2	0.00676107	0.00397434	0.157715	0.00290595	0.00125597	0.00355609	0.843289	0.317032
SL010610	CD207	Q9UJ71	-0.000825278	0.0039834	0.882729	4.36193e-05	-0.00118652	0.00337754	0.844185	0.317592
SL000461	IGHE IGK@ IGL@	P01854	-0.00440672	0.00397184	0.379498	0.00123563	-0.00116321	0.00333773	0.845112	0.317443
SL004725	HAT1	O14929	0.00364158	0.00396356	0.475515	0.000850216	0.00121886	0.0034939	0.845112	0.31893
SL007266	PSMD7	P51665	0.0036153	0.00397977	0.481102	0.000830353	-0.00125993	0.00365061	0.846544	0.317817
SL013928	PPIE	Q9UNP9	0.00218965	0.00397369	0.67756	0.000305073	0.00132736	0.00383756	0.846544	0.317442
SL010466	MFRP	Q9BY79	0.00452262	0.00398626	0.368225	0.00129852	0.00122192	0.00356201	0.847607	0.317011
SL004296	AK1	P00568	-0.00166057	0.00397395	0.754984	0.000175456	-0.00127482	0.00376377	0.850629	0.317439
SL006523	MFGE8	Q08431	-0.00288297	0.0039803	0.581171	0.000528043	0.00124025	0.00368736	0.851169	0.317397
SL007310	RAC3	P60763	-0.0049264	0.00397123	0.322735	0.00154424	-0.00131527	0.00390519	0.851169	0.317438
SL004149	IL13RA1	P78552	0.0151699	0.00395534	0.000437705	0.0146259	-0.00113595	0.00343278	0.852126	0.316304
SL004670	ARTN	Q5T4W7	-0.00304026	0.00397879	0.560427	0.000591212	0.00111169	0.00333816	0.852126	0.317324
SL004765	MAPKAPK3	Q16644	-0.00307724	0.0039731	0.554262	0.000602529	-0.00128888	0.003855	0.852126	0.317437
SL006230	LUM	P51884	0.0324312	0.00384209	1.01761e-15	0.0669494	0.00123236	0.00371065	0.852126	0.315921
SL014488	VAV1	P15498	0.000236336	0.00397429	0.970496	3.554e-06	0.0012805	0.0038647	0.852127	0.317435
SL000346	CTSH	P09668	-0.00223362	0.00398642	0.674406	0.000317015	-0.00105922	0.00329669	0.852893	0.316539
SL000415	CFH	P08603	0.00885786	0.00396523	0.0550196	0.00499528	-0.00107725	0.00333343	0.852893	0.316377
SL001945	SELE	P16581	-0.00467363	0.00397153	0.349017	0.00138984	-0.0010706	0.00328796	0.852893	0.317433
SL002036	FGFR4	P22455	-0.00110324	0.00399612	0.840705	7.73731e-05	0.00109735	0.00335855	0.852893	0.317916
SL003647	ANXA6	P08133	2.68721e-06	0.0039743	0.999461	4.59473e-10	-0.00112454	0.00342757	0.852893	0.317434
SL004591	CSF3R	Q99062	-0.000674619	0.00396495	0.90094	2.93597e-05	0.00114257	0.00347987	0.852893	0.31739
SL006522	LGALS3BP	Q08380	0.00959949	0.00396726	0.0350045	0.00586155	0.00107683	0.00333681	0.852893	0.316302
SL008102	MDH1	P40925	-0.000441342	0.00397427	0.938284	1.23939e-05	-0.00123331	0.00380993	0.852893	0.317432
SL008331	PA2G4	Q9UQ80	0.000794492	0.00397422	0.886935	4.01638e-05	0.0012379	0.003853	0.852893	0.317431
SL010619	TPSG1	Q9NRR2	-0.0017882	0.00398118	0.738672	0.000205612	-0.00106689	0.00332884	0.852893	0.314866
SL012248	PTK2	Q05397	0.00245855	0.00394726	0.638543	0.000392898	0.0010969	0.00339659	0.852893	0.320072
SL010489	CAMK1	Q14012	0.00791625	0.00397038	0.0903195	0.00398741	0.00117829	0.00372734	0.855926	0.316252
SL011406	PDE7A	Q13946	0.00276663	0.00398551	0.598	0.000486014	0.00109869	0.00348809	0.85616	0.316555
SL017528	RNASEH1	O60930	-0.0023839	0.00400123	0.654	0.000360977	-0.00103347	0.00332044	0.858639	0.317225
SL000309	C1QA C1QB C1QC	P02745 P02746 P02747	0.00826897	0.00398618	0.0770173	0.00436293	0.00103211	0.00332778	0.858833	0.315839
SL010500	LYN	P07948	-0.00283426	0.00397328	0.585646	0.000511135	0.00114013	0.00368838	0.858977	0.317425
SL000506	CGA LHB	P01215, P01229	0.020547	0.00392138	8.68781e-07	0.0268782	-0.00123388	0.00411869	0.866345	0.316367
SL016551	CSNK2A2 CSNK2B	P19784 P67870	0.0020553	0.00397013	0.698483	0.000269549	0.00111281	0.00372382	0.866345	0.317282
SL010505	MATK	P42679	0.00249094	0.00399212	0.638543	0.000393508	0.00103336	0.00347831	0.867103	0.315961
SL004156	TNFRSF10A	O00220	-0.000510444	0.00398673	0.928109	1.66257e-05	0.00100305	0.00339879	0.867293	0.314772
SL005170	ICOS	Q9Y6W8	0.00360823	0.00398346	0.48244	0.000827247	0.00104409	0.00352971	0.867293	0.315978
SL004938	CAMKK1	Q8N5S9	0.00403153	0.00397224	0.423286	0.00103418	0.00109026	0.00371152	0.86772	0.317419
SL011708	ARPP19	P56211	0.00184776	0.00397387	0.728815	0.000217243	0.00114239	0.00393939	0.870208	0.317418
SL008808	SKP1	P63208	0.00451679	0.00397172	0.367198	0.00129813	0.00107595	0.00373024	0.870233	0.317417
SL010520	AURKB	Q96GD4	0.00762529	0.00397699	0.105324	0.0037146	0.000990876	0.00344205	0.870233	0.317228
SL016129	FAM107B	Q9H098	0.00390862	0.00398865	0.443638	0.000971976	0.000976728	0.00339921	0.870233	0.31777
SL003328	CFI	P05156	0.00953411	0.00396868	0.0366363	0.00578993	-0.000972609	0.00340506	0.870947	0.315015
SL007358	PRKCQ	Q04759	0.00339313	0.00397396	0.508759	0.000733646	0.00101965	0.00361572	0.873319	0.316095
SL004155	PDGFRB	P09619	0.00552523	0.003975	0.256838	0.00194192	-0.000931793	0.00331921	0.873323	0.316991
SL004751	HMOX2	P30519	0.00364152	0.0039877	0.478447	0.000841628	0.000992044	0.00353986	0.873323	0.319174
SL010492	CAMK2B	Q13554	0.0041343	0.00397822	0.411949	0.00108753	0.00100809	0.00366877	0.877275	0.31631
SL017610	CXCL3 CXCL2	P19876 P19875	0.00302731	0.00397314	0.560508	0.000583137	0.00103154	0.00378451	0.878416	0.317411
SL000308	SERPING1	P05155	0.0160079	0.00394304	0.000182358	0.016327	0.000911786	0.00339234	0.880441	0.315642
SL004258	ADIPOQ	Q15848	0.0207647	0.00392258	6.69144e-07	0.0274454	-0.000998072	0.00373004	0.880441	0.315894
SL010612	DKK4	Q9UBT3	0.0167299	0.00393875	8.54421e-05	0.0178091	-0.000952276	0.00354851	0.880441	0.317409
SL010470	SEMA3E	O15041	0.0207184	0.003917	6.80119e-07	0.0274834	-0.000922349	0.00347057	0.881243	0.317261
SL014308	FGF8	P55075	0.00234868	0.00395288	0.654342	0.000355757	-0.00096023	0.0036278	0.881412	0.319016
SL012188	EPS15L1	Q9UBC2	0.00285164	0.00397327	0.585088	0.000517421	0.000962471	0.00364899	0.881449	0.317408
SL008516	CST2	P09228	0.0215229	0.0039184	2.42258e-07	0.0295164	0.000906808	0.0034695	0.882751	0.315564
SL004865	CDH6	P55285	-0.0202123	0.0039487	1.59846e-06	0.025911	-0.000924444	0.00358276	0.884859	0.316009
SL003172	CXCL6	P80162	0.00767013	0.00396947	0.102417	0.0037497	0.00093646	0.00365106	0.88542	0.317684
SL003191	PPBP	P02775	0.00227122	0.00397364	0.66792	0.000328228	0.000886949	0.00349704	0.887114	0.317404
SL001731	ENO2	P09104	0.00259742	0.00397802	0.621413	0.000429157	0.000985539	0.00391878	0.888189	0.31698
SL016828	EGFR	P00533	-0.00276442	0.00399027	0.598	0.000486043	0.000838116	0.00336148	0.889284	0.317933
SL000467	IGHG1 IGHG2 IGHG3 IGHG4 IGK@ IGL@	P01857	0.00786291	0.00399222	0.0949104	0.00393073	0.000821808	0.00332624	0.890463	0.317373
SL010449	CA10	Q9NS85	0.00179406	0.00398211	0.738672	0.000206026	-0.000819434	0.00334521	0.890755	0.316629
SL007385	IL24	Q13007	0.00190571	0.00398161	0.719714	0.000230647	0.000882962	0.00359949	0.890755	0.31849
SL011049	MASP1	P48740	-0.0169454	0.00394857	7.16126e-05	0.0182453	-0.000846561	0.00348674	0.891847	0.31679
SL004346	IL20	Q9NYY1	0.00239363	0.00397688	0.650367	0.000364686	0.000878327	0.00364975	0.892919	0.316735
SL001905	MSLN	Q13421	0.00150277	0.00398995	0.780295	0.000143268	0.000833534	0.00348474	0.893409	0.316596
SL000563	CCL5	P13501	0.00126868	0.00397409	0.811942	0.000102415	0.000857614	0.00360573	0.893803	0.317399
SL006694	CNDP1	Q96KN2	-0.0142626	0.00394849	0.000976019	0.0129435	0.000843116	0.00360098	0.896215	0.317397
SL005235	NANOG	Q9H9S0	0.00146941	0.00398305	0.783534	0.000138716	0.000786655	0.00337466	0.896336	0.317925
SL000584	TGFB1	P01137	0.0050158	0.00397888	0.31355	0.00159777	0.000837584	0.00363751	0.898003	0.317489
SL008522	SEMA5A	Q13591	0.0045478	0.0039917	0.366362	0.00131208	0.000767047	0.00335148	0.898435	0.316707
SL003848	ANXA5	P08758	-0.000849251	0.00398164	0.878421	4.63723e-05	0.000761242	0.00334294	0.898659	0.315268
SL006913	FYN	P06241	-0.00151796	0.00397401	0.777875	0.000146615	0.000841315	0.00374999	0.900767	0.317394
SL004685	PSPN	O60542	-0.00136287	0.00398114	0.799656	0.00011848	-0.000802949	0.0036189	0.902117	0.313535
SL008059	RPS3	P23396	0.00137904	0.00398604	0.798824	0.000120765	0.000755503	0.00348798	0.905849	0.318436
SL003171	FGF4	P08620	0.00254578	0.00397437	0.628192	0.000412608	0.000771116	0.00357553	0.905886	0.317103
SL003951	BDNF	P23560	0.00342072	0.00397282	0.504967	0.000744547	-0.000736047	0.00348852	0.908464	0.31739
SL004400	F9	P00740	0.0162733	0.00394661	0.000141912	0.0168839	0.000701675	0.00337786	0.908464	0.316289
SL004914	PPA1	Q15181	0.00462973	0.00397159	0.35406	0.00136385	0.000759826	0.00366591	0.908464	0.317389
SL005250	CMA1	P23946	0.00238199	0.00397153	0.651449	0.000362854	0.000742232	0.00357694	0.908464	0.319096
SL006803	ANGPTL3	Q9Y5C1	0.00256477	0.00398889	0.626874	0.000417422	-0.000724829	0.00349493	0.908464	0.317484
SL007024	GREM1	O60565	0.00330574	0.00399243	0.523624	0.000692733	0.000728182	0.00350248	0.908464	0.317972
SL013969	KYNU	Q16719	0.00442378	0.00397644	0.37899	0.00124483	0.000743901	0.00364396	0.910354	0.316371
SL003197	CCL25	O15444	-0.0043233	0.00398229	0.391294	0.00118669	0.000646806	0.00330641	0.916063	0.31699
SL005437	MEPE	Q9NQ76	0.00020996	0.0039989	0.973097	2.79869e-06	-0.000665914	0.00340044	0.916063	0.31618
SL000045	IGFBP3	P17936	-0.00819027	0.00397771	0.0790769	0.00426422	-0.00069535	0.00365201	0.918404	0.315064
SL000316	C4A C4B	P0C0L4, P0C0L5	0.0103999	0.0039704	0.0206695	0.00688257	-0.000650778	0.00341022	0.918404	0.314734
SL010454	CNTN4	Q8IWV2	0.00578238	0.00397177	0.235993	0.00212994	-0.000642384	0.00337814	0.918404	0.315424
SL005161	FGF12	P61328	-0.00122653	0.00398266	0.818575	9.60836e-05	0.000655471	0.00353432	0.921622	0.318307
SL006916	LCK	P06239	3.1755e-05	0.0039693	0.995512	6.47143e-08	0.000619803	0.0034297	0.924873	0.315932
SL000537	PDGFB	P01127	-0.000349984	0.00397428	0.951792	7.79387e-06	-0.000607877	0.00352178	0.929436	0.31738
SL005190	LILRB1	Q8NHL6	0.0115256	0.00395944	0.00937981	0.00846101	0.000580023	0.00335713	0.929436	0.315554
SL014896	ANK2	Q01484	0.00101305	0.00399715	0.854493	6.55399e-05	-0.000582365	0.00334594	0.929436	0.312855
SL002782	ADM	P35318	0.00652193	0.00397801	0.174778	0.00270502	0.00059152	0.0036364	0.93708	0.31606
SL000442	GH1	P01241	0.00483873	0.00398084	0.332606	0.00149467	0.000528692	0.0033309	0.939644	0.317715
SL003196	CCL17	Q92583	0.00895778	0.00396414	0.0517288	0.00510572	0.000554642	0.00352805	0.939647	0.317377
SL003648	GDI2	P50395	0.00170142	0.00397393	0.749912	0.000184196	0.000596292	0.0038498	0.939647	0.317376
SL004253	HSD17B1	P14061	-0.000415574	0.0039861	0.942402	1.10235e-05	-0.00051981	0.0033724	0.939647	0.313792
SL005159	EPOR	P19235	0.00151779	0.00398161	0.777875	0.00014676	-0.000567277	0.0036254	0.939647	0.313585
SL007261	METAP2	P50579	-0.00359554	0.00397266	0.482461	0.000822593	0.000620287	0.00401739	0.939647	0.317376
SL000313	C3	P01024	0.00472453	0.00400364	0.348295	0.00142621	0.000500746	0.00334558	0.94264	0.312628
SL000603	PRSS1	P07477	-0.000267642	0.0039689	0.967062	4.57948e-06	-0.000484362	0.00328153	0.943611	0.317098
SL000062	KLK3	P07288	0.003278	0.00397294	0.524398	0.000683715	0.000851839	0.0058538	0.943615	0.317374
SL002695	CNDP2	Q96KP4	0.00167728	0.00397665	0.753814	0.000178942	-0.000523766	0.00361614	0.943615	0.316931
SL004869	CA13	Q8N1Q1	-0.00299672	0.00397316	0.563495	0.000571412	-0.000548572	0.00376956	0.943615	0.317374
SL005229	ULBP3	Q9BZM4	0.00613853	0.00397261	0.204512	0.00239634	0.000530994	0.0037228	0.944459	0.317134
SL010515	RPS6KA3	P51812	9.9423e-05	0.0039743	0.987638	6.2897e-07	0.000519819	0.00366071	0.944459	0.317374
SL000497	LAMA1 LAMB1 LAMC1	P25391, P07942, P11047	0.0125133	0.00395518	0.00434953	0.00997938	-0.000485538	0.00357658	0.945842	0.316267
SL002646	MMP14	P50281	0.00135885	0.00399398	0.799656	0.000117383	0.000450279	0.00331443	0.945842	0.319929
SL003726	CHEK2	O96017	0.00108879	0.00400292	0.842678	7.51048e-05	-0.000454352	0.00331739	0.945842	0.314971
SL004689	WISP1	O95388	-0.0222577	0.00391562	8.83833e-08	0.0315141	0.000510887	0.00373574	0.945842	0.316195
SL010522	CDK8 CCNC	P49336 P24863	0.00382552	0.00397293	0.451871	0.000933775	0.000516407	0.00373369	0.945842	0.315531
SL003722	AKT2	P31751	0.00142149	0.00397404	0.789859	0.000128572	-0.000524097	0.0039351	0.947223	0.317372
SL001717	IL10	P22301	0.00122844	0.00398162	0.818575	9.6532e-05	0.000433786	0.00334808	0.948713	0.316922
SL003770	SFRP1	Q8N474	0.0190868	0.00391526	5.20321e-06	0.0235354	0.000453969	0.00348367	0.948713	0.31657
SL000613	PLAU	P00749	0.0194821	0.00393746	3.65062e-06	0.0241083	0.00043889	0.00344758	0.949067	0.316536
SL007108	IRF1	P10914	0.00397565	0.00400216	0.435621	0.00100695	0.000426989	0.00335428	0.949067	0.31895
SL000347	SERPINA6	P08185	6.86858e-05	0.00398787	0.991597	3.00259e-07	0.000431645	0.00353513	0.951124	0.315258
SL003192	CFP	P27918	0.00103733	0.00398265	0.850103	6.859e-05	-0.000408598	0.00331987	0.951124	0.315615
SL003800	KLK4	Q9Y5K2	0.000691421	0.00398904	0.899053	3.04999e-05	-0.000416745	0.00343941	0.951124	0.315157
SL004066	PLA2G2E	Q9NZK7	-0.00225562	0.00398202	0.670995	0.00032466	-0.000408129	0.00336906	0.951124	0.314476
SL002792	ADRBK1	P25098	-0.00314418	0.00397305	0.543345	0.000629028	0.000465576	0.00389082	0.951588	0.31737
SL000322	C6	P13671	0.00424247	0.00398061	0.399039	0.00114606	-0.000389227	0.00335144	0.953752	0.315328
SL004861	IL18RAP	O95256	0.00149814	0.00398957	0.780555	0.000142703	0.000400063	0.00348899	0.954208	0.314594
SL010391	WFIKKN2	Q8TEU8	0.0110723	0.00396277	0.0130959	0.00780063	-0.000350674	0.00334591	0.96009	0.31619
SL000560	SELP	P16109	0.00126856	0.00397409	0.811942	0.000102395	-0.000378992	0.0035954	0.96009	0.317367
SL006378	ESD	P10768	0.00146502	0.00397403	0.783534	0.000136566	0.000392678	0.00370454	0.96009	0.317367
SL010513	PRKACA	P17612	-0.00374316	0.00397253	0.462546	0.000891524	0.000377673	0.00370186	0.960745	0.317367
SL010524	WNK3	Q9BYP7	0.00189898	0.00398045	0.72034	0.000229155	0.000369037	0.00362139	0.960745	0.317457
SL000251	AHSG	P02765	-0.019831	0.00389348	1.79606e-06	0.0255607	0.000341564	0.0034232	0.960745	0.316888
SL004348	IFNL1	Q8IU54	0.0031114	0.0039765	0.549429	0.00061616	0.000374761	0.00373003	0.960745	0.316783
SL008382	CST5	P28325	0.0291573	0.00387208	8.75594e-13	0.0540696	-0.000362661	0.00364975	0.960745	0.316126
SL004654	GZMH	P20718	0.00267945	0.00397433	0.609855	0.000458911	0.000333676	0.00341235	0.961284	0.317083
SL003440	PLA2G7	Q13093	0.00326328	0.00395088	0.524276	0.000690025	0.000315967	0.00332779	0.961321	0.316477
SL008122	DUSP3	P51452	-0.00580871	0.00397003	0.233765	0.00214692	0.000357117	0.0037598	0.961321	0.317366
SL014111	KIRREL3	Q8IZU9	0.00819294	0.00398431	0.0793616	0.00426578	0.000341412	0.00354664	0.961321	0.31412
SL003331	MMP16	P51512	-0.000122657	0.00400429	0.985416	9.56455e-07	-0.000296721	0.00339833	0.965313	0.317427
SL004644	EDA	Q92838	0.00267754	0.00397413	0.609855	0.00046016	-0.00029517	0.00334157	0.965313	0.318002
SL005155	TDGF1	P13385	0.00656991	0.00396884	0.169829	0.00274647	0.000288584	0.00329752	0.965313	0.317365
SL005179	IL36B	Q9NZH7	0.00258919	0.00397673	0.62212	0.000431057	0.000282758	0.00336123	0.966402	0.313469
SL005725	GRAP2	O75791	-0.00430271	0.00399607	0.394329	0.00117682	-0.000285487	0.00336192	0.966402	0.315594
SL017289	UBB	P0CG47	0.00573466	0.00398987	0.242136	0.00208869	0.000275963	0.00340384	0.967976	0.317796
SL000319	C5	P01031	0.01389	0.00396864	0.00143748	0.0122464	-0.000270897	0.00339203	0.967976	0.315905
SL004875	IL1RL2	Q9HB29	0.00465478	0.00396897	0.350951	0.00138741	-0.00027614	0.00347762	0.967976	0.31635
SL006912	FGR	P09769	0.00267114	0.00400565	0.614058	0.000451248	-0.000265117	0.00338109	0.968023	0.317656
SL004661	ACAN	P16112	0.0082602	0.00397873	0.0768189	0.00434355	0.000260022	0.00339198	0.968296	0.315834
SL007059	LY86	O95711	0.00480603	0.00397663	0.33528	0.00147026	0.000279306	0.00367925	0.968296	0.315988
SL007953	PDXK	O00764	0.00302193	0.00398045	0.560867	0.0005801	0.000259467	0.00344708	0.968296	0.317407
SL004329	GDF5	P43026	-0.000760817	0.0039751	0.889602	3.68522e-05	0.000236615	0.00332561	0.970905	0.316309
SL004910	ALDOA	P04075	-0.00135678	0.00397406	0.799656	0.000117131	-0.000268406	0.00388791	0.971867	0.317363
SL000449	DNAJB1	P25685	-0.002193	0.00397369	0.677493	0.000306008	0.00024236	0.00373888	0.973959	0.317363
SL010374	METAP1	P53582	0.000414031	0.00397428	0.942402	1.09074e-05	-0.000254045	0.00393259	0.973959	0.317363
SL000554	PRKCD	Q05655	0.00302417	0.00397314	0.560508	0.000581926	-0.000225827	0.00364486	0.975349	0.317362
SL014070	SLITRK5	O94991	0.0126868	0.00396315	0.00385961	0.0102452	0.000204798	0.00344691	0.976656	0.315214
SL000312	C3	P01024	0.00102932	0.00397934	0.850885	6.74426e-05	0.00015318	0.0033011	0.98418	0.31552
SL000589	CGA TSHB	P01215 P01222	-0.0085916	0.00397766	0.0643551	0.00469519	0.000163292	0.00333279	0.98418	0.315741
SL002525	C2	P06681	0.00820679	0.00397702	0.0783393	0.00428285	-0.00015549	0.00334632	0.98418	0.317176
SL005263	LRPAP1	P30533	0.00632579	0.00397325	0.189684	0.00254613	0.000163267	0.00348649	0.98418	0.316184
SL001753	SIGLEC1	Q9BZZ2	0.00483636	0.00400328	0.33528	0.00148405	-0.000147477	0.0034002	0.9851	0.31614
SL004610	LRP8	Q14114	-0.000761748	0.00400491	0.889602	3.6727e-05	0.00014794	0.00338128	0.9851	0.317501
SL006542	FCN2	Q15485	-0.000874987	0.00398113	0.87662	4.87412e-05	0.000136184	0.00331015	0.986141	0.314666
SL005189	IL7R	P16871	-0.00179231	0.00399149	0.738672	0.000203832	0.000128326	0.00334704	0.987644	0.315632
SL000587	TG	P01266	-0.000730092	0.00398624	0.89316	3.3917e-05	0.000107957	0.00346191	0.992678	0.316267
SL016557	HMGCR	P04035	0.000171169	0.00398694	0.978551	1.87127e-06	-9.37773e-05	0.00335941	0.993799	0.315851
SL000038	CCL2	P13500	0.0078681	0.00398516	0.0941296	0.00392989	-9.25183e-05	0.00338316	0.993799	0.316271
SL005261	PTPN2	P17706	0.00427182	0.00398871	0.39621	0.00116547	9.1942e-05	0.00341423	0.993799	0.315763
SL013988	CHST2	Q9Y4C5	0.00173095	0.00398515	0.746178	0.000190337	-7.70763e-05	0.00360569	0.995233	0.317002
SL001902	BCAM	P50895	0.0152715	0.00395591	0.000399033	0.0148449	-7.9737e-05	0.00337454	0.995233	0.317054
SL004469	APP	P05067	0.00338864	0.00397284	0.508892	0.000730646	7.47647e-05	0.00345525	0.995233	0.31736
SL007471	COLEC12	Q5KU26	-0.0044058	0.00397644	0.380012	0.00123598	-7.48853e-05	0.00351226	0.995233	0.315675
SL000535	PDGFA	P04085	0.00107528	0.00397415	0.843163	7.35698e-05	5.71949e-05	0.00347305	0.996051	0.31736
SL004704	COMMD7	Q86VX2	0.00648891	0.00397342	0.176389	0.00267855	6.28974e-05	0.00362874	0.996051	0.318184
SL004708	PPBP	P02775	0.00146107	0.00397403	0.783687	0.00013583	5.80238e-05	0.00348362	0.996051	0.31736
SL005183	IL22RA2	Q969J5	-0.0198365	0.00392855	2.23031e-06	0.0252057	-6.36997e-05	0.00350881	0.996051	0.315692
SL014096	LRRTM1	Q86UE6	-6.24726e-05	0.00399437	0.9921	2.48592e-07	5.17335e-05	0.003412	0.99633	0.315244
SL000532	SPARC	P09486	-1.02303e-05	0.0039743	0.998714	6.65939e-09	-4.68502e-05	0.00342201	0.996741	0.31736
SL005220	SHH	Q15465	0.000654899	0.00399768	0.904076	2.72172e-05	-4.02955e-05	0.00338139	0.997394	0.314747
SL004367	DKK1	O94907	0.00305797	0.00397311	0.556809	0.000595007	2.92668e-05	0.00348562	0.997905	0.31736
SL004838	CD47	Q08722	0.00296169	0.00397126	0.568223	0.000559797	-3.45767e-05	0.00370441	0.997905	0.314992
SL005703	NOTCH1	P46531	-0.00152713	0.00397884	0.777054	0.000148328	-3.01704e-05	0.00332301	0.997905	0.3165
SL000493	LDHB	P07195	0.00518566	0.00397466	0.293993	0.00170953	-1.54391e-05	0.00377237	0.998785	0.317657
SL000515	CCL8	P80075	0.00508113	0.00398215	0.307773	0.00164684	-2.17366e-05	0.00346799	0.998785	0.313652
SL004924	EIF4H	Q15056	-0.0036309	0.0039772	0.478447	0.00083861	-1.31584e-05	0.00363556	0.998785	0.316937
SL006374	BMX	P51813	-0.00316974	0.00398289	0.542167	0.000640644	-1.19995e-05	0.00347987	0.998785	0.31265
SL000557	PRKCZ	Q05513	0.00323582	0.00398551	0.532096	0.000664718	4.10477e-06	0.00364459	0.999102	0.31801
SL009629	MBD4	O95243	0.00221703	0.00398	0.675192	0.000312386	5.46209e-06	0.00345244	0.999102	0.317529
