# Supplementary material for: Plasma proteomic biomarker signature of age predicts health and life span
Source: eLife. 2020 Nov 19;9:e61073. doi: 10.7554/eLife.61073 (PMC7723412; doi:10.7554/eLife.61073)
Supplement: Supplementary file 1. — (1A) Age-associated proteins mediation by DNA methylation (1B) Age-associated proteins at different age waves (1C) Age-associated diseases considered for Mendelian randomization (1D) 76-protein signature weights (1E) Enrichment analysis of proteins associated with mortality and multimorbidity [file elife-61073-supp1.xlsx]

## Sheet: S file 1A
Supplementary file 1A. Age associated proteins mediation by DNA methylation
SomaId	Target	CpG	Step 1: Pro ~ b(Age) + e			Step 2: Methylation ~ b(Age) + e			Step 3: Pro ~ b(Age) + b(methylation) + e			Step 3: Pro ~ b(Age) + b(methylation) + e			absprop	sobel_p
			b	SE	P	b	SE	P	b	SE	P	b	SE	P
SL009045	ENPP7	cg15739835	0.00535713	0.00178297	0.00280503	-0.000823564	9.19689e-05	8.58324e-18	-0.000137045	0.00181671	0.939901	-6.67122	0.851485	3.32024e-14	1	3.71277e-09
SL005200	MICB	cg08009669	0.00502956	0.00119425	3.05953e-05	-0.00105477	0.000122282	1.06986e-16	0.00833422	0.00122146	2.85801e-11	3.13306	0.434134	2.25136e-12	0.657048	3.11156e-08
SL009045	ENPP7	cg23900422	0.00535713	0.00178297	0.00280503	-0.00134582	0.000155501	8.45975e-17	0.00982825	0.00184276	1.51873e-07	3.32223	0.513346	2.5007e-10	0.834611	2.18438e-07
SL000316	C4	cg11433081	0.00345375	0.000902977	0.000149105	-0.000925018	0.000109144	3.2898e-16	0.00125244	0.000931602	0.179493	-2.37976	0.371875	3.89281e-10	1	3.27249e-07
SL000316	C4	cg11433081	0.00345375	0.000902977	0.000149105	-0.000925018	0.000109144	3.2898e-16	0.00125244	0.000931602	0.179493	-2.37976	0.371875	3.89281e-10	1	3.27249e-07
SL000678	Granulysin	cg24620635	0.00543645	0.00107012	5.49814e-07	-0.000578473	9.80979e-05	7.19951e-09	0.00307737	0.00103064	0.0029794	-4.07812	0.473286	1.13299e-16	0.433937	1.13649e-06
SL000316	C4	cg21808937	0.00345375	0.000902977	0.000149105	-0.000746003	0.000107817	1.54982e-11	0.00161133	0.000908078	0.0766605	-2.46973	0.375583	1.33406e-10	1	1.8743e-06
SL000316	C4	cg21808937	0.00345375	0.000902977	0.000149105	-0.000746003	0.000107817	1.54982e-11	0.00161133	0.000908078	0.0766605	-2.46973	0.375583	1.33406e-10	1	1.8743e-06
SL004298	granzyme A	cg01881524	0.00349307	0.00064455	9.69641e-08	0.00102844	0.000126009	3.23852e-15	0.0021015	0.00066608	0.00171103	1.3531	0.231004	9.00869e-09	0.398382	1.948e-06
SL004363	SCGF-alpha	cg25309343	0.00377795	0.00100635	0.000196402	-0.000745148	9.48086e-05	2.79155e-14	0.00166819	0.0010345	0.107531	-2.83132	0.479063	6.70106e-09	1	2.31678e-06
SL010617	TPSB2	cg09956782	0.00540033	0.00163415	0.00102565	-0.000955387	0.000130073	9.5237e-13	0.00867292	0.00166427	2.84757e-07	3.42541	0.566041	2.99622e-09	0.605998	3.00449e-06
SL004362	SCGF-alpha	cg25309343	0.00342982	0.00091736	0.00020837	-0.000745148	9.48086e-05	2.79155e-14	0.00157442	0.000945512	0.0965704	-2.48998	0.437856	2.31577e-08	1	4.08071e-06
SL000316	C4	cg26392102	0.00345375	0.000902977	0.000149105	-0.000980181	0.000101706	3.98307e-20	0.00552433	0.000963466	1.79375e-08	2.11244	0.404714	2.73416e-07	0.599514	4.43938e-06
SL000316	C4	cg26392102	0.00345375	0.000902977	0.000149105	-0.000980181	0.000101706	3.98307e-20	0.00552433	0.000963466	1.79375e-08	2.11244	0.404714	2.73416e-07	0.599514	4.43938e-06
SL005200	MICB	cg15063443	0.00502956	0.00119425	3.05953e-05	-0.000542112	7.50208e-05	2.11049e-12	0.00276877	0.00121822	0.0235049	-4.17033	0.721021	1.36029e-08	0.4495	6.31463e-06
SL004363	SCGF-alpha	cg16651537	0.00377795	0.00100635	0.000196402	-0.000939808	0.000150068	8.74608e-10	0.00203381	0.00100879	0.0443775	-1.85585	0.301771	1.69649e-09	0.461663	1.14448e-05
SL000316	C4	cg13770361	0.00345375	0.000902977	0.000149105	-0.00127309	0.000100906	1.67348e-31	0.00588719	0.00102602	1.75392e-08	1.91143	0.410291	4.1861e-06	0.704576	1.24073e-05
SL000316	C4	cg13770361	0.00345375	0.000902977	0.000149105	-0.00127309	0.000100906	1.67348e-31	0.00588719	0.00102602	1.75392e-08	1.91143	0.410291	4.1861e-06	0.704576	1.24073e-05
SL009045	ENPP7	cg04938107	0.00535713	0.00178297	0.00280503	-0.000374942	5.06443e-05	6.41542e-13	0.00212795	0.00183132	0.245851	-8.61248	1.59682	1.11048e-07	1	1.30442e-05
SL010617	TPSB2	cg10473367	0.00540033	0.00163415	0.00102565	-0.00134775	0.000172028	3.32765e-14	0.00843639	0.00169264	8.85414e-07	2.25268	0.432156	2.82733e-07	0.562198	1.42592e-05
SL000678	Granulysin	cg11752275	0.00543645	0.00107012	5.49814e-07	-0.000703867	0.000137177	4.26369e-07	0.00349622	0.00103058	0.000752842	-2.75653	0.341372	6.04845e-15	0.356893	1.48637e-05
SL004298	granzyme A	cg01096487	0.00349307	0.00064455	9.69641e-08	0.000626897	7.44151e-05	4.74651e-16	0.00224487	0.000674978	0.000952756	1.99108	0.394752	6.59709e-07	0.357337	1.50798e-05
SL004298	granzyme A	cg13306522	0.00349307	0.00064455	9.69641e-08	0.000990256	0.00011303	3.80594e-17	0.00221721	0.00067931	0.00118146	1.28841	0.260138	1.03224e-06	0.365254	1.62131e-05
SL004362	SCGF-alpha	cg16651537	0.00342982	0.00091736	0.00020837	-0.000939808	0.000150068	8.74608e-10	0.00189305	0.000922088	0.0406425	-1.6352	0.275834	6.05041e-09	0.448063	1.66817e-05
SL000616	Vitronectin	cg10342447	-0.00219761	0.000789008	0.00557036	0.000493088	9.69892e-05	5.40192e-07	-0.00079583	0.000760713	0.29604	-2.84286	0.356938	1.33417e-14	1	1.82467e-05
SL005200	MICB	cg04405704	0.00502956	0.00119425	3.05953e-05	-0.0016289	0.000153312	1.05458e-23	0.00231563	0.00130476	0.0766083	-1.66612	0.357129	4.06021e-06	1	1.94033e-05
SL002525	C2	cg11433081	0.00222251	0.000451497	1.19681e-06	-0.000928778	0.00010918	2.60073e-16	0.003087	0.000474127	1.9827e-10	0.930777	0.189102	1.20031e-06	0.388967	2.04116e-05
SL004362	SCGF-alpha	cg24790297	0.00342982	0.00091736	0.00020837	-0.000756726	0.000137762	6.57248e-08	0.00192549	0.000904958	0.0338968	-1.98795	0.297616	6.99547e-11	0.438603	2.20905e-05
SL004363	SCGF-alpha	cg24790297	0.00377795	0.00100635	0.000196402	-0.000756726	0.000137762	6.57248e-08	0.00214099	0.000993527	0.0316897	-2.16321	0.326744	1.00843e-10	0.433293	2.36419e-05
SL000316	C4	cg13028630	0.00345375	0.000902977	0.000149105	-0.000652883	9.40316e-05	1.3286e-11	0.00193604	0.000922379	0.0363718	-2.32463	0.437282	1.66622e-07	0.439439	2.43269e-05
SL000316	C4	cg13028630	0.00345375	0.000902977	0.000149105	-0.000652883	9.40316e-05	1.3286e-11	0.00193604	0.000922379	0.0363718	-2.32463	0.437282	1.66622e-07	0.439439	2.43269e-05
SL004298	granzyme A	cg15335436	0.00349307	0.00064455	9.69641e-08	0.00113208	0.000101043	6.57087e-26	0.0019949	0.000712656	0.00533935	1.32338	0.292224	7.58829e-06	0.428896	2.68536e-05
SL005200	MICB	cg27014438	0.00502956	0.00119425	3.05953e-05	-0.00235527	0.000252496	4.74157e-19	0.00263109	0.00127428	0.0395128	-1.01834	0.216774	3.49174e-06	0.476875	2.72051e-05
SL000678	Granulysin	cg16874347	0.00543645	0.00107012	5.49814e-07	-0.000554511	6.87621e-05	6.5001e-15	0.00354186	0.00111689	0.00162031	-3.41669	0.710226	2.04595e-06	0.348498	3.60528e-05
SL000316	C4	cg01517384	0.00345375	0.000902977	0.000149105	-0.00210819	0.000213724	6.28283e-21	0.00528266	0.000974725	9.71328e-08	0.867527	0.194063	9.87626e-06	0.529542	4.66669e-05
SL000316	C4	cg01517384	0.00345375	0.000902977	0.000149105	-0.00210819	0.000213724	6.28283e-21	0.00528266	0.000974725	9.71328e-08	0.867527	0.194063	9.87626e-06	0.529542	4.66669e-05
SL004298	granzyme A	cg08350776	0.00349307	0.00064455	9.69641e-08	0.000950148	9.02506e-05	2.36356e-23	0.00212169	0.000704418	0.0027398	1.44333	0.327543	1.31082e-05	0.392599	4.80672e-05
SL000316	C4	cg10093328	0.00345375	0.000902977	0.000149105	-0.000592644	9.02259e-05	1.39206e-10	0.00208698	0.000920403	0.023831	-2.30623	0.457056	6.54372e-07	0.395735	6.29535e-05
SL000316	C4	cg10093328	0.00345375	0.000902977	0.000149105	-0.000592644	9.02259e-05	1.39206e-10	0.00208698	0.000920403	0.023831	-2.30623	0.457056	6.54372e-07	0.395735	6.29535e-05
SL010617	TPSB2	cg03497872	0.00540033	0.00163415	0.00102565	-0.00121829	0.000290895	3.37678e-05	0.00875058	0.00145364	3.59453e-09	2.74996	0.229395	5.66226e-29	0.620379	7.69387e-05
SL004298	granzyme A	cg00865849	0.00349307	0.00064455	9.69641e-08	0.000733855	8.74564e-05	6.06652e-16	0.00238248	0.000678412	0.000489335	1.51337	0.337775	9.43116e-06	0.317942	7.74063e-05
SL005200	MICB	cg00218406	0.00502956	0.00119425	3.05953e-05	-0.00141906	0.000205435	1.66839e-11	0.003221	0.00122612	0.00890598	-1.27448	0.266194	2.2858e-06	0.359587	8.32012e-05
SL000283	b2-Microglobulin	cg10439456	0.0108023	0.000662523	1.93329e-47	-0.00112651	0.000144086	3.72676e-14	0.00975246	0.000691557	9.75703e-38	-0.93193	0.210857	1.23641e-05	0.097186	0.000119327
SL000678	Granulysin	cg10628126	0.00543645	0.00107012	5.49814e-07	-0.000381926	7.7045e-05	1.00888e-06	0.00401019	0.00105916	0.000173372	-3.73439	0.625799	4.83853e-09	0.262352	0.000137219
SL004298	granzyme A	cg10928257	0.00349307	0.00064455	9.69641e-08	0.000763979	9.28584e-05	2.01118e-15	0.00245373	0.000677984	0.000328662	1.36043	0.318748	2.39987e-05	0.297544	0.000151497
SL004298	granzyme A	cg22668767	0.00349307	0.00064455	9.69641e-08	0.000728836	0.00010462	1.13852e-11	0.00256718	0.00066407	0.000126791	1.27037	0.282309	8.6398e-06	0.265064	0.000156877
SL004298	granzyme A	cg17839166	0.00349307	0.00064455	9.69641e-08	-0.000535267	8.06243e-05	8.97505e-11	0.00259474	0.000660601	9.89747e-05	-1.67828	0.366034	5.87031e-06	0.257175	0.000161447
SL000678	Granulysin	cg25066857	0.00543645	0.00107012	5.49814e-07	-0.000435622	7.96254e-05	7.38201e-08	0.004062	0.00107483	0.000178175	-3.15516	0.611097	3.63121e-07	0.252823	0.000173365
SL010617	TPSB2	cg01640660	0.00540033	0.00163415	0.00102565	-0.00091643	0.000179114	4.59158e-07	0.00749395	0.00162855	5.44155e-06	2.28453	0.413636	5.60621e-08	0.387683	0.000174449
SL002525	C2	cg13028630	0.00222251	0.000451497	1.19681e-06	-0.000650915	9.38845e-05	1.41715e-11	0.00286385	0.000465188	1.63913e-09	0.985291	0.220913	1.03403e-05	0.288566	0.00017615
SL010378	RET	cg20628663	-0.0087511	0.000979307	1.00469e-17	-0.00110135	0.000174519	6.5837e-10	-0.00743244	0.000998756	5.00621e-13	1.19731	0.257011	4.18611e-06	0.150685	0.000178246
SL010617	TPSB2	cg03319082	0.00540033	0.00163415	0.00102565	-0.00111116	0.000239852	4.71408e-06	0.00745664	0.00161098	4.80521e-06	1.8506	0.307059	3.45167e-09	0.380774	0.000239759
SL000678	Granulysin	cg16406960	0.00543645	0.00107012	5.49814e-07	-0.000625676	0.000122877	5.18768e-07	0.00413514	0.00106933	0.000126143	-2.07985	0.395595	2.24625e-07	0.239368	0.000254519
SL003340	YKL-40	cg23257225	0.0292871	0.0025326	2.59076e-27	-0.000890083	0.000125485	5.00593e-12	0.0257693	0.00261929	7.62604e-21	-3.95221	0.92582	2.39037e-05	0.120114	0.000254616
SL004298	granzyme A	cg14096482	0.00349307	0.00064455	9.69641e-08	-0.000305281	5.39505e-05	2.69793e-08	0.00269627	0.000651355	4.1472e-05	-2.61006	0.545958	2.36093e-06	0.228109	0.000260371
SL000316	C4	cg09474017	0.00345375	0.000902977	0.000149105	-0.00106503	0.00015961	7.31526e-11	0.00466186	0.000927934	7.29263e-07	1.13434	0.260123	1.60498e-05	0.349796	0.000261847
SL000316	C4	cg09474017	0.00345375	0.000902977	0.000149105	-0.00106503	0.00015961	7.31526e-11	0.00466186	0.000927934	7.29263e-07	1.13434	0.260123	1.60498e-05	0.349796	0.000261847
SL000678	Granulysin	cg08251815	0.00543645	0.00107012	5.49814e-07	0.000582178	0.000105054	5.06377e-08	0.00413209	0.00107952	0.000147358	2.24049	0.464826	1.95672e-06	0.23993	0.000275988
SL005171	IGFBP-4	cg06786600	0.00333642	0.000643607	3.26812e-07	-0.000399633	5.67274e-05	6.87145e-12	0.00421492	0.000665541	5.76531e-10	2.19827	0.521239	2.98203e-05	0.263306	0.000296277
SL003190	MIP-5	cg22254135	0.00636376	0.000879492	1.97545e-12	-0.000770315	0.00015614	1.13399e-06	0.00740785	0.000877098	4.0899e-16	1.3554	0.256307	1.92243e-07	0.164067	0.000309297
SL004209	annexin II	cg18207741	0.00520034	0.0010573	1.21771e-06	0.00134548	0.000137166	9.60035e-21	0.00336588	0.00114598	0.00348008	1.36343	0.354887	0.000139366	0.352757	0.000347203
SL008644	BST1	cg18470593	-0.00305777	0.00098802	0.00209254	0.000354214	7.41692e-05	2.42928e-06	-0.0042171	0.000982909	2.18737e-05	3.27298	0.610756	1.34385e-07	0.379145	0.000363326
SL000414	Factor B	cg11433081	0.00161112	0.000502062	0.00142606	-0.00093387	0.000110553	4.04813e-16	0.00237937	0.000531648	9.65298e-06	0.822644	0.209611	0.000100327	0.476836	0.000371932
SL008623	CNTN2	cg03732545	0.00612979	0.000933543	1.403e-10	0.000597432	0.000104567	1.99682e-08	0.00722541	0.000946668	1.35462e-13	-1.83388	0.408714	9.15363e-06	0.178736	0.000417435
SL000316	C4	cg24376689	0.00345375	0.000902977	0.000149105	-0.00123177	0.000174804	6.82961e-12	0.00464419	0.000935209	9.69496e-07	0.966443	0.238155	5.82633e-05	0.344678	0.000437133
SL000316	C4	cg24376689	0.00345375	0.000902977	0.000149105	-0.00123177	0.000174804	6.82961e-12	0.00464419	0.000935209	9.69496e-07	0.966443	0.238155	5.82633e-05	0.344678	0.000437133
SL000316	C4	cg21722170	0.00345375	0.000902977	0.000149105	-0.000539903	0.000101037	1.44336e-07	0.00242096	0.000910307	0.00810235	-1.91292	0.409718	3.99369e-06	0.299034	0.000438268
SL000316	C4	cg21722170	0.00345375	0.000902977	0.000149105	-0.000539903	0.000101037	1.44336e-07	0.00242096	0.000910307	0.00810235	-1.91292	0.409718	3.99369e-06	0.299034	0.000438268
SL011049	MASP3	cg25478614	-0.00240088	0.000486729	1.13847e-06	0.00167135	0.000101314	2.77511e-48	-0.00373156	0.000607214	1.74419e-09	0.796172	0.222108	0.000374064	0.554247	0.00046027
SL007173	GRN	cg17704343	0.00157572	0.000535651	0.00343083	0.00128932	0.000180185	3.35889e-12	0.000865867	0.000555824	0.119975	0.550567	0.137106	6.93635e-05	1	0.000461992
SL009045	ENPP7	cg01537847	0.00535713	0.00178297	0.00280503	-0.000288865	7.73834e-05	0.000213099	0.00816747	0.00164242	9.35332e-07	9.7289	0.977004	2.84921e-21	0.524598	0.000473381
SL004298	granzyme A	cg06427779	0.00349307	0.00064455	9.69641e-08	0.000686967	9.83953e-05	1.03255e-11	0.00265734	0.000666988	7.88403e-05	1.21655	0.301424	6.37586e-05	0.239254	0.000475537
SL004298	granzyme A	cg14614844	0.00349307	0.00064455	9.69641e-08	0.000552269	0.000111976	1.14127e-06	0.00278248	0.000645451	1.99364e-05	1.28667	0.262735	1.35194e-06	0.203428	0.000510669
SL004298	granzyme A	cg04245540	0.00349307	0.00064455	9.69641e-08	-0.00053915	8.99968e-05	4.23586e-09	0.00273825	0.000657186	3.6992e-05	-1.40003	0.328917	2.52258e-05	0.216092	0.000520801
SL009045	ENPP7	cg11615347	0.00535713	0.00178297	0.00280503	-0.000253639	5.38776e-05	3.32479e-06	0.00342349	0.00177844	0.0548501	-7.6236	1.50639	6.05978e-07	1	0.000566979
SL009045	ENPP7	cg02310027	0.00535713	0.00178297	0.00280503	-0.000156346	3.81158e-05	4.85045e-05	0.00330561	0.00174444	0.0587312	-13.1217	2.10032	9.55989e-10	1	0.000606111
SL000316	C4	cg20543183	0.00345375	0.000902977	0.000149105	-0.00112847	7.29941e-05	1.22996e-43	0.00571833	0.00110164	3.16563e-07	2.00676	0.572888	0.000505857	0.655685	0.000634832
SL000316	C4	cg20543183	0.00345375	0.000902977	0.000149105	-0.00112847	7.29941e-05	1.22996e-43	0.00571833	0.00110164	3.16563e-07	2.00676	0.572888	0.000505857	0.655685	0.000634832
SL005200	MICB	cg07481886	0.00502956	0.00119425	3.05953e-05	-0.000713417	0.000141523	6.69684e-07	0.00630462	0.00120063	2.32794e-07	1.78725	0.387058	5.06354e-06	0.253512	0.000661719
SL005200	MICB	cg13028630	0.00502956	0.00119425	3.05953e-05	-0.000661207	9.42043e-05	8.16969e-12	0.00352283	0.00123813	0.00463786	-2.27876	0.585282	0.00011367	0.299575	0.000662377
SL000316	C4	cg26246342	0.00345375	0.000902977	0.000149105	-0.000661946	6.96721e-05	1.19579e-19	0.00490108	0.000975401	7.26516e-07	2.18647	0.599542	0.000296177	0.419059	0.000662383
SL000316	C4	cg26246342	0.00345375	0.000902977	0.000149105	-0.000661946	6.96721e-05	1.19579e-19	0.00490108	0.000975401	7.26516e-07	2.18647	0.599542	0.000296177	0.419059	0.000662383
SL000316	C4	cg08009669	0.00345375	0.000902977	0.000149105	-0.00105778	0.000122361	9.27277e-17	0.0047894	0.000961002	8.88526e-07	1.26268	0.341234	0.000241723	0.386723	0.000669434
SL000316	C4	cg08009669	0.00345375	0.000902977	0.000149105	-0.00105778	0.000122361	9.27277e-17	0.0047894	0.000961002	8.88526e-07	1.26268	0.341234	0.000241723	0.386723	0.000669434
SL000678	Granulysin	cg14254080	0.00543645	0.00107012	5.49814e-07	0.000667575	0.000135981	1.27331e-06	0.00430472	0.00107331	7.07031e-05	1.69529	0.359481	3.20075e-06	0.208175	0.000671434
SL005213	RELT	cg18252633	0.0071169	0.000635777	7.27348e-26	-0.000426449	8.25467e-05	3.57895e-07	0.00643943	0.000640756	1.35664e-21	-1.58864	0.353313	8.78085e-06	0.0951923	0.00069464
SL005200	MICB	cg10093328	0.00502956	0.00119425	3.05953e-05	-0.000595529	9.03788e-05	1.22512e-10	0.003594	0.00123031	0.00366055	-2.41056	0.609751	8.93625e-05	0.285424	0.000698885
SL005200	MICB	cg21808937	0.00502956	0.00119425	3.05953e-05	-0.000747592	0.000107672	1.32837e-11	0.00354476	0.00123699	0.00435496	-1.98611	0.512142	0.000120858	0.295214	0.000709892
SL012774	CREL1	cg06124721	0.00416943	0.000722557	1.45865e-08	-0.000239004	6.7291e-05	0.000422249	0.00310455	0.000667141	4.28104e-06	-4.45548	0.457012	1.5806e-20	0.255401	0.000846208
SL002525	C2	cg21808937	0.00222251	0.000451497	1.19681e-06	-0.000745609	0.000107514	1.40029e-11	0.00276976	0.000467967	6.40255e-09	0.733961	0.194056	0.000176235	0.246229	0.000898594
SL008381	CATF	cg27239754	0.00476149	0.000668676	4.22755e-12	-0.000356564	6.43732e-05	5.15949e-08	0.00546318	0.000679137	7.66062e-15	1.96793	0.479208	4.764e-05	0.147368	0.000970769
SL000678	Granulysin	cg18310515	0.00543645	0.00107012	5.49814e-07	-0.000321659	7.78671e-05	4.2967e-05	0.0043456	0.00105732	4.69001e-05	-3.39135	0.622982	8.53002e-08	0.200656	0.000999408
SL004645	HAI-1	cg07621749	-0.00517781	0.000784259	1.13881e-10	0.000734906	6.99832e-05	3.13988e-23	-0.00650113	0.000864302	2.94891e-13	1.80066	0.520832	0.000597391	0.255575	0.00102386
SL006544	BGH3	cg16684184	0.00649287	0.000525424	1.8573e-30	0.000822962	0.000180863	6.88112e-06	0.00597411	0.000524996	1.42114e-26	0.630361	0.132948	2.84388e-06	0.0798974	0.00102711
SL004298	granzyme A	cg16375820	0.00349307	0.00064455	9.69641e-08	0.000477872	9.10323e-05	2.34079e-07	0.00284005	0.000651934	1.63508e-05	1.36652	0.325339	3.20747e-05	0.186947	0.00103934
SL005200	MICB	cg25843003	0.00502956	0.00119425	3.05953e-05	-0.00167851	0.000186932	7.24596e-18	0.0032883	0.00127996	0.010516	-1.03739	0.295857	0.000499413	0.346206	0.00109007
SL004081	Bone proteoglycan II	cg22524951	0.00235489	0.000784257	0.0028224	0.000347666	4.88709e-05	4.37053e-12	0.00141181	0.000815449	0.0840693	2.71261	0.739869	0.000274968	1	0.00111812
SL000316	C4	cg05298224	0.00345375	0.000902977	0.000149105	-0.000566451	0.000121669	4.24356e-06	0.00433213	0.00090483	2.28588e-06	1.55066	0.340623	6.81947e-06	0.254324	0.00113418
SL000316	C4	cg05298224	0.00345375	0.000902977	0.000149105	-0.000566451	0.000121669	4.24356e-06	0.00433213	0.00090483	2.28588e-06	1.55066	0.340623	6.81947e-06	0.254324	0.00113418
SL005200	MICB	cg01082299	0.00502956	0.00119425	3.05953e-05	-0.000441214	0.00011094	8.11529e-05	0.00383708	0.00117722	0.00120016	-2.70273	0.489037	5.51231e-08	0.237095	0.00124614
SL004298	granzyme A	cg14967393	0.00349307	0.00064455	9.69641e-08	0.000303904	6.61339e-05	5.59853e-06	0.00288055	0.000645729	1.02908e-05	2.01549	0.446539	8.1227e-06	0.175352	0.00128153
SL010617	TPSB2	cg08578212	0.00540033	0.00163415	0.00102565	-0.000301594	7.12962e-05	2.82276e-05	0.00696341	0.00162447	2.21537e-05	5.18272	1.04555	1.01163e-06	0.289441	0.00129204
SL000283	b2-Microglobulin	cg15022400	0.0108023	0.000662523	1.93329e-47	-0.00110784	0.000104907	1.79161e-23	0.00970968	0.000730684	2.729e-34	-0.986253	0.292116	0.000797704	0.101146	0.00130043
SL000408	Epo	cg18691434	0.00454535	0.00115058	9.03419e-05	0.00140857	0.000116805	2.94065e-29	0.00668764	0.00130696	4.58782e-07	-1.52089	0.456256	0.000927916	0.471314	0.00131388
SL000248	a1-Antichymotrypsin	cg07785447	0.00132386	0.000356623	0.000230811	0.000337692	5.1334e-05	1.30461e-10	0.00172192	0.000368118	3.82978e-06	-1.17878	0.320611	0.000264447	0.300685	0.00133009
SL010617	TPSB2	cg02194908	0.00540033	0.00163415	0.00102565	-0.000464491	0.000129709	0.000378942	0.00352961	0.00157169	0.025199	-4.02747	0.559022	2.42749e-12	0.346409	0.00134253
SL007674	LY9	cg13853198	0.00223361	0.000754654	0.00323832	0.000767625	8.89212e-05	9.98742e-17	0.0011948	0.000804204	0.138049	1.35327	0.391915	0.000606073	1	0.0013459
SL000414	Factor B	cg13028630	0.00161112	0.000502062	0.00142606	-0.000651856	9.5239e-05	2.49261e-11	0.00218752	0.000520376	3.1633e-05	0.884244	0.243903	0.000321196	0.357763	0.00135668
SL003182	Integrin aVb5	cg05907046	0.00343001	0.000804446	2.44607e-05	0.000370445	6.67172e-05	4.8011e-08	0.00262284	0.000818526	0.0014493	2.17893	0.557186	0.000106166	0.235327	0.00138762
SL000316	C4	cg02760218	0.00345375	0.000902977	0.000149105	-0.000711206	0.000134481	1.91918e-07	0.00433665	0.000915284	2.89096e-06	1.2414	0.309696	7.14275e-05	0.255633	0.00140059
SL000316	C4	cg02760218	0.00345375	0.000902977	0.000149105	-0.000711206	0.000134481	1.91918e-07	0.00433665	0.000915284	2.89096e-06	1.2414	0.309696	7.14275e-05	0.255633	0.00140059
SL010617	TPSB2	cg27546911	0.00540033	0.00163415	0.00102565	-0.000369758	9.59901e-05	0.00013387	0.00702558	0.00160592	1.50784e-05	4.39544	0.770197	2.07394e-08	0.300954	0.00140904
SL009045	ENPP7	cg26574247	0.00535713	0.00178297	0.00280503	-0.000224939	5.16616e-05	1.64987e-05	0.00369268	0.00177913	0.0384936	-7.39956	1.57688	3.57105e-06	0.310698	0.00141414
SL007429	GPNMB	cg27178045	0.00224382	0.000649328	0.000600333	-0.000712854	9.47124e-05	2.79789e-13	0.0014481	0.000679956	0.0337317	-1.11624	0.316768	0.000468247	0.354627	0.00141592
SL000408	Epo	cg00048759	0.00454535	0.00115058	9.03419e-05	0.0016682	0.000121121	2.47565e-36	0.00694363	0.00135485	4.40641e-07	-1.43765	0.44021	0.00117389	0.527634	0.0014844
SL000414	Factor B	cg02550722	0.00161112	0.000502062	0.00142606	-0.000853014	8.29572e-05	1.93567e-22	0.00240844	0.00055127	1.54886e-05	0.93471	0.280629	0.000936763	0.494885	0.00153138
SL001802	IFN-g	cg26227465	0.00222131	0.000820492	0.00703813	-0.000439783	8.1339e-05	1.03697e-07	0.00142234	0.000833458	0.0885885	-1.81676	0.465168	0.000108246	1	0.00154554
SL000316	C4	cg06482498	0.00345375	0.000902977	0.000149105	-0.00107979	0.000148647	1.64153e-12	0.00452147	0.000942215	2.16978e-06	0.988816	0.281295	0.000483509	0.309146	0.00155507
SL000316	C4	cg06482498	0.00345375	0.000902977	0.000149105	-0.00107979	0.000148647	1.64153e-12	0.00452147	0.000942215	2.16978e-06	0.988816	0.281295	0.000483509	0.309146	0.00155507
SL005200	MICB	cg23533285	0.00502956	0.00119425	3.05953e-05	-0.000457372	0.000120229	0.000161704	0.00386091	0.00117357	0.00108027	-2.55515	0.450499	2.51866e-08	0.232357	0.00158121
SL000507	Lymphotoxin a1/b2	cg15657588	-0.00313023	0.000605886	3.57809e-07	-0.000818412	8.39895e-05	1.67418e-20	-0.00221873	0.000658849	0.000822822	1.11374	0.334502	0.000940768	0.291192	0.00162884
SL000507	Lymphotoxin a1/b2	cg15657588	-0.00313023	0.000605886	3.57809e-07	-0.000818412	8.39895e-05	1.67418e-20	-0.00221873	0.000658849	0.000822822	1.11374	0.334502	0.000940768	0.291192	0.00162884
SL000678	Granulysin	cg08493581	0.00543645	0.00107012	5.49814e-07	-0.000812704	8.21225e-05	4.69456e-21	0.00381255	0.00116632	0.00116127	-1.99815	0.602343	0.000981503	0.298706	0.00165925
SL002525	C2	cg10093328	0.00222251	0.000451497	1.19681e-06	-0.000592358	9.01705e-05	1.38472e-10	0.00271429	0.000466398	1.11532e-08	0.830199	0.231745	0.000377266	0.22127	0.00166009
SL007674	LY9	cg08246428	0.00223361	0.000754654	0.00323832	-0.000566265	8.36616e-05	3.99487e-11	0.00139673	0.000781656	0.0746185	-1.47789	0.416251	0.000424402	1	0.00166567
SL005200	MICB	cg08117728	0.00502956	0.00119425	3.05953e-05	-0.000439312	7.70029e-05	2.09689e-08	0.00384651	0.00121879	0.00170587	-2.69296	0.716826	0.000194521	0.235219	0.00170323
SL000678	Granulysin	cg08183425	0.00543645	0.00107012	5.49814e-07	-0.000596675	7.57292e-05	2.42279e-14	0.00410598	0.00112728	0.000301077	-2.22982	0.65273	0.000691893	0.244732	0.0017231
SL004858	GFRa-1	cg08874035	0.00743201	0.000947093	3.0441e-14	0.000505394	5.95166e-05	2.88211e-16	0.00617935	0.00100774	1.88344e-09	2.47859	0.736104	0.000823754	0.168549	0.00174763
SL000316	C4	cg17766150	0.00345375	0.000902977	0.000149105	-0.000405948	6.82122e-05	5.3185e-09	0.0043678	0.000924818	3.10422e-06	2.25164	0.612226	0.000263439	0.264653	0.00175651
SL000316	C4	cg17766150	0.00345375	0.000902977	0.000149105	-0.000405948	6.82122e-05	5.3185e-09	0.0043678	0.000924818	3.10422e-06	2.25164	0.612226	0.000263439	0.264653	0.00175651
SL005200	MICB	cg03500977	0.00502956	0.00119425	3.05953e-05	-0.000814485	7.04457e-05	2.7667e-27	0.00711051	0.00134437	1.91511e-07	2.55493	0.786548	0.00124716	0.413744	0.00176475
SL004557	CD59	cg04023915	0.00651363	0.00049014	2.70656e-34	-0.000354916	4.88702e-05	1.6555e-12	0.00594368	0.000511592	1.66817e-27	-1.60586	0.464121	0.000591063	0.0875004	0.00178642
SL000459	IgA	cg18875357	0.00733032	0.00114964	4.44032e-10	0.000760493	8.54701e-05	1.33135e-17	0.00575584	0.00123156	3.89959e-06	2.07034	0.621706	0.000938465	0.21479	0.00181573
SL000459	IgA	cg18875357	0.00733032	0.00114964	4.44032e-10	0.000760493	8.54701e-05	1.33135e-17	0.00575584	0.00123156	3.89959e-06	2.07034	0.621706	0.000938465	0.21479	0.00181573
SL002525	C2	cg04405704	0.00222251	0.000451497	1.19681e-06	-0.0016198	0.000153134	1.57913e-23	0.00294547	0.000498702	6.86718e-09	0.446327	0.136779	0.0011851	0.325291	0.00182009
SL000316	C4	cg09715059	0.00345375	0.000902977	0.000149105	-0.00145628	0.000149747	1.95857e-20	0.00479405	0.000981846	1.45214e-06	0.920355	0.279686	0.00107736	0.38807	0.00182664
SL000316	C4	cg09715059	0.00345375	0.000902977	0.000149105	-0.00145628	0.000149747	1.95857e-20	0.00479405	0.000981846	1.45214e-06	0.920355	0.279686	0.00107736	0.38807	0.00182664
SL008516	CYTT	cg26854096	0.00905352	0.0011895	1.5678e-13	-0.000377726	5.64952e-05	6.70697e-11	0.00776032	0.00123108	6.86747e-10	-3.42366	0.972862	0.000476371	0.14284	0.00184489
SL000316	C4	cg21108826	0.00345375	0.000902977	0.000149105	0.000399515	9.10199e-05	1.41504e-05	0.00265252	0.000903856	0.00350825	2.00551	0.455986	1.36147e-05	0.231988	0.00189097
SL000316	C4	cg21108826	0.00345375	0.000902977	0.000149105	0.000399515	9.10199e-05	1.41504e-05	0.00265252	0.000903856	0.00350825	2.00551	0.455986	1.36147e-05	0.231988	0.00189097
SL004140	Ephrin-A4	cg14788660	0.00573248	0.000490466	8.59509e-28	-0.000384707	6.12597e-05	7.89097e-10	0.00522408	0.000504732	1.08233e-22	-1.32152	0.369788	0.000389456	0.0886873	0.00189631
SL000467	IgG	cg10163998	0.00158342	0.000605552	0.00922611	0.00116422	7.68153e-05	3.11163e-42	0.000227782	0.000736605	0.757288	1.16442	0.367542	0.0016388	1	0.00192811
SL011809	XTP3A	cg07041748	0.0047245	0.000700749	4.75873e-11	0.00057822	0.000105971	8.00397e-08	0.00539099	0.000713073	2.25438e-13	-1.15266	0.305933	0.000186524	0.141071	0.00193279
SL010519	ZAP70	cg20990620	0.00425238	0.000835343	5.23873e-07	-0.000303311	5.45376e-05	4.57376e-08	0.00505454	0.000851301	5.76784e-09	2.64467	0.708839	0.000214955	0.188637	0.00194592
SL010456	CYTN	cg26854096	0.00773472	0.00118634	1.86284e-10	-0.000374588	5.65731e-05	9.99188e-11	0.00646412	0.00122681	2.11735e-07	-3.39199	0.96802	0.000503387	0.164272	0.00195427
SL000678	Granulysin	cg21634260	0.00543645	0.00107012	5.49814e-07	-0.000238798	4.37111e-05	7.69225e-08	0.00442504	0.00108897	5.68987e-05	-4.23542	1.12793	0.000195698	0.186042	0.00197126
SL004298	granzyme A	cg09637885	0.00349307	0.00064455	9.69641e-08	-0.000407288	6.68065e-05	2.30797e-09	0.00284329	0.000661746	2.12096e-05	-1.59539	0.44559	0.000379885	0.186021	0.00201945
SL004209	annexin II	cg02072495	0.00520034	0.0010573	1.21771e-06	-0.00102896	0.000121202	2.91059e-16	0.00382557	0.00112526	0.000733661	-1.33607	0.403249	0.000995383	0.264361	0.00202503
SL005200	MICB	cg23232773	0.00502956	0.00119425	3.05953e-05	-0.000688097	9.92268e-05	1.40419e-11	0.00371028	0.00124111	0.00294615	-1.91729	0.557645	0.000639584	0.262306	0.00206745
SL008380	CATZ	cg19155932	0.0065145	0.000725539	7.12947e-18	0.000652145	0.000125887	3.3242e-07	0.0058515	0.000735591	1.42376e-14	1.01664	0.265375	0.000145481	0.101773	0.00206852
SL000316	C4	cg23164535	0.00345375	0.000902977	0.000149105	-0.000588337	8.10772e-05	1.72689e-12	0.00448594	0.000942925	2.63817e-06	1.75441	0.516171	0.000736237	0.298859	0.00208404
SL000316	C4	cg23164535	0.00345375	0.000902977	0.000149105	-0.000588337	8.10772e-05	1.72689e-12	0.00448594	0.000942925	2.63817e-06	1.75441	0.516171	0.000736237	0.298859	0.00208404
SL005200	MICB	cg10715529	0.00502956	0.00119425	3.05953e-05	-0.000544297	7.44762e-05	1.22406e-12	0.00639523	0.00124823	4.44454e-07	2.50906	0.743307	0.000800003	0.271529	0.00218067
SL014983	H2B2E	cg27564108	0.00458629	0.00119316	0.000138323	-0.000855979	9.91531e-05	1.00804e-16	0.00615027	0.00127345	1.87187e-06	1.82713	0.557597	0.00113029	0.341012	0.00218747
SL005195	LAG-3	cg19300195	0.00746282	0.00113219	1.20059e-10	-0.000539221	7.08096e-05	1.52115e-13	0.00613103	0.0011886	3.72247e-07	-2.46983	0.738964	0.000899137	0.178456	0.00220977
SL010617	TPSB2	cg09016926	0.00540033	0.00163415	0.00102565	0.000482809	0.000130503	0.000242234	0.00390614	0.00160875	0.0155658	3.09479	0.5682	8.40826e-08	0.276686	0.00221061
SL004298	granzyme A	cg13869401	0.00349307	0.00064455	9.69641e-08	0.000523997	7.15188e-05	1.07625e-12	0.0027584	0.000673797	5.01963e-05	1.40205	0.416902	0.000835901	0.210323	0.0022399
SL004298	granzyme A	cg11080540	0.00349307	0.00064455	9.69641e-08	0.000479234	9.37948e-05	4.75731e-07	0.00291552	0.000653149	1.01599e-05	1.20515	0.31682	0.000161841	0.165341	0.00227957
SL004298	granzyme A	cg10932018	0.00349307	0.00064455	9.69641e-08	0.000473671	6.35009e-05	4.41599e-13	0.00275017	0.000675202	5.47014e-05	1.56838	0.469621	0.000907619	0.212677	0.00230283
SL012395	NET1	cg20340716	0.00983546	0.000835842	4.25248e-28	-0.000437526	6.72022e-05	1.97852e-10	0.00896728	0.000863582	8.23108e-23	-1.9843	0.575621	0.000618978	0.0882705	0.00231496
SL005172	IGFBP-6	cg18037834	0.00755524	0.000703482	3.82194e-24	-0.000515141	5.4135e-05	1.0437e-19	0.0085496	0.000762321	6.02852e-26	1.93027	0.601794	0.00143308	0.131612	0.00236973
SL003201	VEGF sR2	cg27154163	-0.00271309	0.00048045	2.86954e-08	0.000622576	7.39877e-05	5.07479e-16	-0.0033197	0.000510968	2.14641e-10	0.974345	0.300321	0.00126357	0.223584	0.00246887
SL000316	C4	cg21462693	0.00345375	0.000902977	0.000149105	0.000484699	8.74488e-05	5.05404e-08	0.00261727	0.000920853	0.00468178	1.72577	0.477797	0.000337827	0.242195	0.00247722
SL000316	C4	cg21462693	0.00345375	0.000902977	0.000149105	0.000484699	8.74488e-05	5.05404e-08	0.00261727	0.000920853	0.00468178	1.72577	0.477797	0.000337827	0.242195	0.00247722
SL008644	BST1	cg21123203	-0.00305777	0.00098802	0.00209254	0.000295573	6.93231e-05	2.45361e-05	-0.0038911	0.000989055	9.67689e-05	2.81939	0.660794	2.42356e-05	0.27253	0.00256185
SL004298	granzyme A	cg02034689	0.00349307	0.00064455	9.69641e-08	0.000497315	9.54114e-05	2.82955e-07	0.00292032	0.000654437	1.02265e-05	1.15169	0.311723	0.000246969	0.163969	0.00257666
SL000319	C5a	cg13696706	0.00348162	0.000473058	8.70783e-13	0.000678668	7.88275e-05	1.21487e-16	0.00287401	0.000505063	2.27859e-08	0.895296	0.278805	0.00141594	0.174519	0.00262345
SL004298	granzyme A	cg16462648	0.00349307	0.00064455	9.69641e-08	-0.000461509	9.00998e-05	4.46149e-07	0.00292691	0.000653692	9.55437e-06	-1.22675	0.330042	0.000226713	0.162079	0.00262678
SL005190	ILT-2	cg02630143	0.00269133	0.00077687	0.000581563	-0.000356582	8.66342e-05	4.57362e-05	0.00333595	0.000775712	2.08488e-05	1.80778	0.410857	1.34846e-05	0.239518	0.00264859
SL005171	IGFBP-4	cg25211566	0.00333642	0.000643607	3.26812e-07	-0.000331143	5.23464e-05	6.00356e-10	0.00397841	0.000663525	4.1206e-09	1.93869	0.56857	0.000707978	0.192416	0.00268643
SL000678	Granulysin	cg00052964	0.00543645	0.00107012	5.49814e-07	0.00041068	7.4362e-05	5.60432e-08	0.00446575	0.00109136	5.05728e-05	2.36364	0.664023	0.000410342	0.178554	0.00277196
SL004683	Noggin	cg13675837	-0.00278895	0.00114699	0.0154195	-0.00114934	9.84365e-05	9.7269e-28	-0.00470878	0.00129517	0.000308966	-1.67038	0.540618	0.00212593	0.688372	0.00281778
SL003785	GAPDH, liver	cg23551979	0.00744038	0.00266461	0.00545254	0.000819591	0.000129322	5.59223e-10	0.00479962	0.00274781	0.0813593	3.22205	0.951977	0.000774302	1	0.00283106
SL005218	Siglec-7	cg18390959	0.00454039	0.000583299	4.75721e-14	-0.000461131	7.71804e-05	4.64823e-09	0.00509532	0.000598628	2.51006e-16	1.20341	0.349785	0.000634333	0.122221	0.00286878
SL000440	Hemopexin	cg08185661	0.00569168	0.00179685	0.00163982	0.00119108	0.000123346	3.33114e-20	0.00820888	0.00195257	3.15413e-05	-2.11337	0.674231	0.00183241	0.442259	0.00286978
SL007674	LY9	cg17010827	0.00223361	0.000754654	0.00323832	-0.00065869	7.648e-05	1.16131e-16	0.00127913	0.000805534	0.112994	-1.44905	0.456571	0.00160626	1	0.00290129
SL000283	b2-Microglobulin	cg22107533	0.0108023	0.000662523	1.93329e-47	-0.00114475	0.000105142	1.059e-24	0.009772	0.000736683	3.42541e-34	-0.900016	0.292056	0.00218318	0.0953769	0.00302517
SL005200	MICB	cg09115485	0.00502956	0.00119425	3.05953e-05	-0.000674687	0.000109328	1.50047e-09	0.00618374	0.00122924	7.05799e-07	1.71069	0.506342	0.000791537	0.22948	0.00304174
SL007502	ST4S6	cg00902104	0.00401091	0.000464081	9.36471e-17	0.00097546	0.000108353	6.00891e-18	0.00461789	0.000498841	8.28841e-19	-0.622246	0.198662	0.00184707	0.151331	0.00309393
SL001896	Clusterin	cg21210376	0.00200442	0.000688019	0.00375147	-0.0011545	0.000138667	9.81283e-16	0.00284366	0.000731189	0.000115586	0.726938	0.229843	0.00166716	0.4187	0.00311041
SL009045	ENPP7	cg24673886	0.00535713	0.00178297	0.00280503	-0.000365598	0.00011577	0.00169374	0.00740348	0.00168087	1.32171e-05	5.59728	0.671163	8.85424e-16	0.381987	0.00314378
SL000316	C4	cg18842363	0.00345375	0.000902977	0.000149105	-0.000581081	0.000106012	7.00792e-08	0.00425555	0.000921011	4.994e-06	1.37984	0.394476	0.000515132	0.232153	0.00319162
SL000316	C4	cg18842363	0.00345375	0.000902977	0.000149105	-0.000581081	0.000106012	7.00792e-08	0.00425555	0.000921011	4.994e-06	1.37984	0.394476	0.000515132	0.232153	0.00319162
SL000678	Granulysin	cg07133479	0.00543645	0.00107012	5.49814e-07	0.000507289	6.60168e-05	9.44353e-14	0.00422598	0.00112585	0.000196792	2.38616	0.749999	0.00156467	0.222658	0.00328685
SL004145	HVEM	cg27229529	0.00272435	0.00071403	0.00015476	-0.000288336	5.75438e-05	7.78246e-07	0.00212356	0.000723891	0.00352129	-2.08363	0.574722	0.000321195	0.220525	0.00331144
SL010519	ZAP70	cg25734624	0.00425238	0.000835343	5.23873e-07	-0.000327962	5.67851e-05	1.42527e-08	0.00501553	0.000855533	8.79552e-09	2.32692	0.682462	0.000708801	0.179462	0.00332345
SL000507	Lymphotoxin a1/b2	cg14646977	-0.00313023	0.000605886	3.57809e-07	0.000380639	7.21171e-05	2.02519e-07	-0.00260822	0.000616464	2.81674e-05	-1.3714	0.389009	0.000465831	0.166764	0.00337245
SL000507	Lymphotoxin a1/b2	cg14646977	-0.00313023	0.000605886	3.57809e-07	0.000380639	7.21171e-05	2.02519e-07	-0.00260822	0.000616464	2.81674e-05	-1.3714	0.389009	0.000465831	0.166764	0.00337245
SL008822	EMR2	cg16893618	0.00443812	0.000772457	1.67797e-08	-0.000881986	0.000111429	1.89218e-14	0.00354376	0.000815849	1.72926e-05	-1.01403	0.321495	0.00171654	0.201517	0.00338921
SL004579	Macrophage mannose receptor	cg19201533	0.00809448	0.000593677	9.07199e-36	-0.000471507	0.000120588	0.00010623	0.00856427	0.000591663	2.34466e-39	0.996357	0.225532	1.24629e-05	0.0580383	0.00341183
SL010288	Carbonic anhydrase 6	cg17442683	-0.00821013	0.00144937	2.60996e-08	-0.000552924	0.00013818	7.34201e-05	-0.007067	0.0014472	1.44642e-06	2.06743	0.481557	2.15264e-05	0.139234	0.00342047
SL000678	Granulysin	cg14279650	0.00543645	0.00107012	5.49814e-07	-0.000563339	8.06837e-05	1.02754e-11	0.00432236	0.00111426	0.00012023	-1.97766	0.613486	0.00135632	0.20493	0.00342521
SL000316	C4	cg07481886	0.00345375	0.000902977	0.000149105	-0.000712255	0.000141073	6.44218e-07	0.00421064	0.000916056	5.57695e-06	1.06266	0.296234	0.000370533	0.219148	0.00345274
SL000316	C4	cg07481886	0.00345375	0.000902977	0.000149105	-0.000712255	0.000141073	6.44218e-07	0.00421064	0.000916056	5.57695e-06	1.06266	0.296234	0.000370533	0.219148	0.00345274
SL005200	MICB	cg11187245	0.00502956	0.00119425	3.05953e-05	-0.00122339	0.000130982	4.30476e-19	0.00343535	0.00129176	0.0081041	-1.30311	0.423521	0.00221847	0.316969	0.00347378
SL009045	ENPP7	cg21462477	0.00535713	0.00178297	0.00280503	-0.0003186	0.000100712	0.00166264	0.00724826	0.00169988	2.44118e-05	5.93574	0.780208	1.60387e-13	0.353011	0.00348889
SL004858	GFRa-1	cg05372730	0.00743201	0.000947093	3.0441e-14	0.000403683	4.21771e-05	6.69115e-20	0.00614644	0.00102832	4.58397e-09	3.18461	1.04093	0.00234856	0.172978	0.00356673
SL005191	ILT-4	cg10583119	0.00469515	0.000647034	1.72262e-12	-0.00104649	0.000135444	7.10502e-14	0.00396762	0.000681507	1.10057e-08	-0.695217	0.221571	0.00181355	0.154955	0.003648
SL000460	IgD	cg02210934	-0.0135408	0.00430383	0.00176173	-0.00071015	0.000103136	1.90511e-11	-0.00914533	0.00447599	0.0416058	6.18947	1.93045	0.00143916	0.324608	0.0036541
SL005200	MICB	cg16175906	0.00502956	0.00119425	3.05953e-05	-0.00035494	6.16155e-05	1.54584e-08	0.00610251	0.00122324	8.6685e-07	3.0229	0.898527	0.000832508	0.213328	0.00367104
SL010617	TPSB2	cg03466598	0.00540033	0.00163415	0.00102565	-0.000279704	6.74166e-05	3.98496e-05	0.00666926	0.00163701	5.44924e-05	4.53669	1.11506	5.57432e-05	0.234972	0.00367385
SL002525	C2	cg21722170	0.00222251	0.000451497	1.19681e-06	-0.000541887	0.000100902	1.25556e-07	0.00260977	0.000460117	2.51668e-08	0.714639	0.207308	0.000619073	0.174242	0.00371957
SL000247	6-Phosphogluconate dehydrogenase	cg16125214	-0.0351254	0.00272073	9.74761e-33	0.000812159	8.67495e-05	3.53624e-19	-0.031527	0.00294311	4.85294e-24	-4.43063	1.45239	0.00241682	0.102444	0.0037258
SL000316	C4	cg01372898	0.00345375	0.000902977	0.000149105	-0.000559223	0.000120279	4.36856e-06	0.0041715	0.000911574	6.12063e-06	1.28347	0.347151	0.000244688	0.207816	0.00380649
SL000316	C4	cg01372898	0.00345375	0.000902977	0.000149105	-0.000559223	0.000120279	4.36856e-06	0.0041715	0.000911574	6.12063e-06	1.28347	0.347151	0.000244688	0.207816	0.00380649
SL004899	HSP70 protein 8	cg02525108	0.00253227	0.0010569	0.0169776	0.000857047	0.000105376	3.95653e-15	0.00130051	0.0011202	0.246266	1.43722	0.464332	0.0020873	1	0.00381778
SL009045	ENPP7	cg14554017	0.00535713	0.00178297	0.00280503	-0.000296376	6.63056e-05	9.87872e-06	0.00396645	0.00179546	0.0276592	-4.6923	1.23857	0.000171837	0.259595	0.00385163
SL000428	FSH	cg09863441	0.0363179	0.00193302	8.39055e-59	0.000477978	7.24303e-05	1.14553e-10	0.0382139	0.00200256	3.92076e-60	-3.96654	1.23455	0.00140667	0.0522034	0.00386769
SL005102	SHBG	cg13248847	0.00429326	0.00120378	0.000399889	-0.000428432	6.87539e-05	1.04925e-09	0.00316289	0.00124081	0.0111273	-2.63839	0.809663	0.00120299	0.263289	0.00388154
SL005172	IGFBP-6	cg18076651	0.00755524	0.000703482	3.82194e-24	-0.000891076	8.1451e-05	6.70185e-25	0.00648777	0.000783468	1.36874e-15	-1.19796	0.400549	0.00293319	0.141289	0.00391498
SL010617	TPSB2	cg02453013	0.00540033	0.00163415	0.00102565	-0.000784823	0.000209136	0.000197483	0.00666541	0.00162523	4.86708e-05	1.61193	0.358043	8.55632e-06	0.23426	0.00394425
SL000344	Cathepsin D	cg01485797	0.00726572	0.00112617	2.85095e-10	-0.000924982	0.000111257	1.09638e-15	0.00860627	0.00119809	2.83092e-12	1.44928	0.471726	0.00225288	0.184504	0.00395396
SL005195	LAG-3	cg13120986	0.00746282	0.00113219	1.20059e-10	-0.00148868	0.000105989	1.60918e-37	0.00529351	0.00134305	9.36892e-05	-1.45721	0.495015	0.00340769	0.290682	0.00396214
SL004438	Cystatin M	cg22213242	-0.00311123	0.000973889	0.00149669	0.00063337	4.99162e-05	7.97405e-32	-0.00141783	0.00112275	0.207297	-2.67363	0.904053	0.00326342	1	0.00397439
SL004209	annexin II	cg22777952	0.00520034	0.0010573	1.21771e-06	0.000329122	6.15956e-05	1.44188e-07	0.00430853	0.00107726	7.40152e-05	2.70966	0.792882	0.000688568	0.17149	0.00398956
SL004354	IL-19	cg06952715	-0.001586	0.000544301	0.00374577	-0.000618713	7.73894e-05	1.07628e-14	-0.00220831	0.000575856	0.000143364	-1.00581	0.326336	0.00218003	0.392376	0.00402973
SL002823	sL-Selectin	cg16054275	-0.00381713	0.00057374	8.20979e-11	-0.00185139	9.3739e-05	2.91748e-63	-0.00229171	0.000774469	0.00324595	0.823936	0.283704	0.00386025	0.399626	0.00406195
SL007502	ST4S6	cg07960841	0.00401091	0.000464081	9.36471e-17	0.000535574	7.61748e-05	7.54041e-12	0.00353491	0.000483892	1.25023e-12	0.888776	0.282557	0.00176683	0.118678	0.00408871
SL000316	C4	cg10715529	0.00345375	0.000902977	0.000149105	-0.000548776	7.45296e-05	8.48582e-13	0.00441569	0.000946251	4.03765e-06	1.75288	0.562635	0.00195277	0.27852	0.00411484
SL000316	C4	cg10715529	0.00345375	0.000902977	0.000149105	-0.000548776	7.45296e-05	8.48582e-13	0.00441569	0.000946251	4.03765e-06	1.75288	0.562635	0.00195277	0.27852	0.00411484
SL002706	CD23	cg14074174	0.00419297	0.00104102	6.59734e-05	-0.000883151	8.12355e-05	1.24963e-24	0.0057545	0.00115852	9.63986e-07	1.76814	0.595675	0.00315302	0.372416	0.00419024
SL000414	Factor B	cg12589456	0.00161112	0.000502062	0.00142606	-0.000252484	5.66231e-05	1.03837e-05	0.00199753	0.000505773	9.07775e-05	1.53042	0.409891	0.000212651	0.239837	0.00420077
SL005200	MICB	cg01064373	0.00502956	0.00119425	3.05953e-05	-0.000537104	0.000119112	8.28799e-06	0.0041081	0.00120397	0.000702253	-1.7156	0.463618	0.000241608	0.183209	0.00422902
SL011888	SMOC1	cg10077401	0.00766922	0.000570717	6.61513e-35	0.00029871	5.21245e-05	1.82223e-08	0.00716896	0.000584644	4.67902e-30	1.67474	0.507821	0.00105067	0.0652298	0.00425816
SL010391	WFKN2	cg14350358	0.001754	0.000714473	0.014461	0.00047439	7.69694e-05	1.56296e-09	0.00240941	0.000736035	0.00114282	-1.38159	0.429384	0.00138449	0.373668	0.00434014
SL000316	C4	cg14261401	0.00345375	0.000902977	0.000149105	-0.000337999	0.000108922	0.00203415	0.00255241	0.000864936	0.00333152	-2.6667	0.368396	1.94892e-12	0.260974	0.00434311
SL000316	C4	cg14261401	0.00345375	0.000902977	0.000149105	-0.000337999	0.000108922	0.00203415	0.00255241	0.000864936	0.00333152	-2.6667	0.368396	1.94892e-12	0.260974	0.00434311
SL001766	HCG	cg01284415	0.0280648	0.00244188	4.90565e-27	-0.00059611	0.000147484	6.21989e-05	0.029889	0.00244491	6.23838e-30	3.06015	0.761155	6.79509e-05	0.064999	0.00436631
SL000316	C4	cg27449793	0.00345375	0.000902977	0.000149105	-0.000320783	7.48314e-05	2.21475e-05	0.00277225	0.000907641	0.00238823	-2.12451	0.557477	0.000157523	0.197324	0.00439719
SL000316	C4	cg27449793	0.00345375	0.000902977	0.000149105	-0.000320783	7.48314e-05	2.21475e-05	0.00277225	0.000907641	0.00238823	-2.12451	0.557477	0.000157523	0.197324	0.00439719
SL003785	GAPDH, liver	cg11300147	0.00744038	0.00266461	0.00545254	-0.0010759	0.000159702	4.86842e-11	0.00483267	0.00276691	0.0813796	-2.42374	0.772209	0.00180677	1	0.00443993
SL012774	CREL1	cg02569759	0.00416943	0.000722557	1.45865e-08	0.000344534	5.87735e-05	8.75468e-09	0.00480678	0.000741454	2.3365e-10	-1.84991	0.568538	0.00122318	0.152864	0.00444213
SL005115	Spondin-1	cg18787012	0.00796517	0.000626428	6.33753e-32	0.000296467	4.52099e-05	1.48187e-10	0.00856603	0.000648901	6.34054e-34	-2.02673	0.641887	0.00169707	0.075436	0.00444311
SL000316	C4	cg23321397	0.00345375	0.000902977	0.000149105	-0.00127538	0.00016606	9.81755e-14	0.00443935	0.000951028	4.01074e-06	0.77279	0.252611	0.00235051	0.285371	0.00448246
SL000316	C4	cg23321397	0.00345375	0.000902977	0.000149105	-0.00127538	0.00016606	9.81755e-14	0.00443935	0.000951028	4.01074e-06	0.77279	0.252611	0.00235051	0.285371	0.00448246
SL016928	SLAF7	cg13904520	0.00621455	0.00127983	1.6553e-06	-0.000395093	6.51307e-05	2.77136e-09	0.00505387	0.00131741	0.00014275	-2.93772	0.914895	0.00141733	0.186767	0.00454064
SL003785	GAPDH, liver	cg07027613	0.00744038	0.00266461	0.00545254	-0.00153837	9.74115e-05	3.63277e-45	0.00182376	0.00328553	0.579106	-3.65101	1.26812	0.00417579	1	0.00462031
SL010381	Soggy-1	cg07134608	-0.00540006	0.000766141	6.74941e-12	-0.000664377	0.000121182	6.96395e-08	-0.00475582	0.000782543	2.58963e-09	0.96969	0.293207	0.00101724	0.119302	0.004628
SL003060	bFGF-R	cg24463664	0.00310438	0.00050373	1.57088e-09	0.000524783	7.46242e-05	7.44822e-12	0.00361172	0.000525394	2.05707e-11	-0.966765	0.312849	0.00212263	0.163428	0.00466791
SL000316	C4	cg18331619	0.00345375	0.000902977	0.000149105	-0.000254599	6.40437e-05	8.1701e-05	0.00412019	0.00090355	6.58849e-06	2.61757	0.650213	6.65573e-05	0.192958	0.00467447
SL000316	C4	cg18331619	0.00345375	0.000902977	0.000149105	-0.000254599	6.40437e-05	8.1701e-05	0.00412019	0.00090355	6.58849e-06	2.61757	0.650213	6.65573e-05	0.192958	0.00467447
SL012783	WFKN1	cg08776660	-0.00230958	0.000844852	0.00650562	-0.000679746	8.51362e-05	1.15549e-14	-0.0013636	0.00089392	0.12785	1.39167	0.46012	0.00263028	1	0.0046775
SL003332	MMP-17	cg07744430	0.00214594	0.000896659	0.0171028	-0.000633481	8.50185e-05	4.68264e-13	0.00309381	0.000941103	0.0010894	1.49628	0.489433	0.00236593	0.441702	0.0046787
SL004143	GFRa-2	cg13180375	0.00453072	0.000615568	8.65596e-13	-0.000657707	7.99307e-05	2.01405e-15	0.00523898	0.000654018	9.71029e-15	1.07686	0.357887	0.00276748	0.156324	0.00471444
SL006924	ART	cg27150460	-0.00377746	0.000646691	9.85121e-09	-0.0011643	0.000115471	1.00853e-21	-0.00466791	0.000709094	1.27109e-10	-0.764791	0.259809	0.00340914	0.235726	0.00471766
SL000343	Cathepsin B	cg11908155	0.00530598	0.000766836	1.54044e-11	0.000329904	8.78088e-05	0.000194155	0.00587052	0.000764332	9.75517e-14	-1.71125	0.401033	2.40976e-05	0.106398	0.00480505
SL000316	C4	cg22863148	0.00345375	0.000902977	0.000149105	-0.000842428	0.000205864	5.0559e-05	0.00411649	0.00090553	7.02329e-06	0.786691	0.202521	0.000117792	0.191887	0.00484275
SL000316	C4	cg22863148	0.00345375	0.000902977	0.000149105	-0.000842428	0.000205864	5.0559e-05	0.00411649	0.00090553	7.02329e-06	0.786691	0.202521	0.000117792	0.191887	0.00484275
SL012783	WFKN1	cg08110413	-0.00230958	0.000844852	0.00650562	-0.00065211	7.6714e-05	2.69767e-16	-0.00131608	0.000901439	0.144984	1.52351	0.510773	0.00300978	1	0.00488503
SL000316	C4	cg00459243	0.00345375	0.000902977	0.000149105	-0.000438735	0.000103623	2.77918e-05	0.00411742	0.000907614	7.32952e-06	1.51269	0.402764	0.000195292	0.192159	0.00495948
SL000316	C4	cg00459243	0.00345375	0.000902977	0.000149105	-0.000438735	0.000103623	2.77918e-05	0.00411742	0.000907614	7.32952e-06	1.51269	0.402764	0.000195292	0.192159	0.00495948
SL004016	CXCL16, soluble	cg04117356	0.00374449	0.00051959	2.40083e-12	-0.000376666	6.10601e-05	1.52192e-09	0.00421394	0.000535638	2.67781e-14	1.24633	0.395064	0.00171307	0.12537	0.00497328
SL000507	Lymphotoxin a1/b2	cg14737484	-0.00313023	0.000605886	3.57809e-07	-0.000708063	0.000121158	9.71766e-09	-0.00260392	0.00062192	3.39756e-05	0.743309	0.232092	0.00145745	0.168138	0.00497626
SL000507	Lymphotoxin a1/b2	cg14737484	-0.00313023	0.000605886	3.57809e-07	-0.000708063	0.000121158	9.71766e-09	-0.00260392	0.00062192	3.39756e-05	0.743309	0.232092	0.00145745	0.168138	0.00497626
SL005261	TCPTP	cg15514496	0.00192575	0.000805728	0.0172536	0.000597917	8.24133e-05	1.75873e-12	0.00109621	0.000843669	0.194493	1.38739	0.455707	0.00246727	1	0.00499558
SL004260	resistin	cg23095776	0.00373419	0.000905999	4.46791e-05	-0.000332926	5.40519e-05	1.60229e-09	0.0029205	0.000933801	0.00187556	-2.44404	0.776547	0.00175572	0.217902	0.00506872
SL003869	MIC-1	cg26857911	0.0201903	0.000917482	1.02735e-73	0.000130265	3.02018e-05	1.97354e-05	0.0195177	0.000923358	1.23848e-69	5.16404	1.40189	0.000257532	0.0333175	0.00509294
SL004821	S100A4	cg06275635	0.00224545	0.000907372	0.0136977	-0.000399674	5.9966e-05	7.64031e-11	0.00311022	0.000941713	0.00103284	2.16369	0.701313	0.0021579	0.385121	0.00511368
SL010470	Semaphorin 3E	cg17137182	0.0080889	0.00113961	4.87857e-12	0.000361126	4.75608e-05	1.78344e-13	0.00688196	0.001199	1.73387e-08	3.34216	1.11233	0.0028058	0.14921	0.00520857
SL005200	MICB	cg23923934	0.00502956	0.00119425	3.05953e-05	-0.000599712	0.000146207	4.85722e-05	0.00416609	0.00119841	0.000557175	-1.43982	0.377351	0.000154676	0.17168	0.00521032
SL007547	TIMD3	cg18374914	0.00918174	0.000769535	9.1704e-29	-0.000661573	6.41274e-05	1.40892e-22	0.010249	0.000847453	2.09835e-29	1.61317	0.556246	0.00391023	0.116234	0.00524017
SL007674	LY9	cg09765302	0.00223361	0.000754654	0.00323832	0.000471489	6.80579e-05	1.45577e-11	0.00149532	0.000786119	0.05778	1.56587	0.513496	0.00242597	1	0.00525446
SL000510	Lysozyme	cg16408865	0.00291828	0.000434462	5.5403e-11	-0.00160659	0.00014148	1.73021e-26	0.00225831	0.000488185	4.86823e-06	-0.410788	0.142669	0.0041735	0.22615	0.00525485
SL014008	FUT5	cg10789314	0.00729715	0.00101363	2.50156e-12	-0.00113362	0.000132851	2.10595e-16	0.00611399	0.00108215	2.82865e-08	-1.0437	0.353553	0.00331939	0.16214	0.00527399
SL004363	SCGF-alpha	cg07798605	0.00377795	0.00100635	0.000196402	-0.00118759	0.000151434	3.151e-14	0.00268547	0.00106277	0.0118461	-0.919908	0.308206	0.00299095	0.289171	0.00527872
SL005156	DAN	cg01693305	0.0103134	0.00102147	9.09315e-22	-0.000291379	5.04046e-05	1.38042e-08	0.00944168	0.00104779	5.66684e-18	-2.99184	0.939646	0.00155216	0.0845265	0.00528794
SL004180	CD30	cg24427243	0.00299945	0.000702285	2.36963e-05	-0.000939532	0.000113594	1.47089e-15	0.0022005	0.000746784	0.00337753	-0.850376	0.287081	0.00321503	0.266367	0.00529208
SL009948	PLXB2	cg16367976	0.00426742	0.000568541	3.20803e-13	-0.000245848	4.93349e-05	8.88072e-07	0.00382711	0.000577289	9.52208e-11	-1.791	0.532525	0.00083518	0.103181	0.00530793
SL000316	C4	cg03157588	0.00345375	0.000902977	0.000149105	-0.000250757	7.96589e-05	0.00175264	0.00268375	0.000879596	0.00241346	-3.0707	0.512112	4.12623e-09	0.222946	0.00531738
SL000316	C4	cg03157588	0.00345375	0.000902977	0.000149105	-0.000250757	7.96589e-05	0.00175264	0.00268375	0.000879596	0.00241346	-3.0707	0.512112	4.12623e-09	0.222946	0.00531738
SL011049	MASP3	cg00404400	-0.00240088	0.000486729	1.13847e-06	-0.000900329	8.1962e-05	4.5917e-25	-0.00168538	0.000543024	0.00203032	0.794706	0.275896	0.00415852	0.298015	0.00533209
SL000344	Cathepsin D	cg27491887	0.00726572	0.00112617	2.85095e-10	0.000680582	0.000106133	3.60965e-10	0.0062249	0.00116529	1.46188e-07	1.5293	0.494435	0.00210424	0.14325	0.00533811
SL005207	NKp46	cg00000714	0.00249152	0.000718363	0.000573988	-0.000428239	7.43586e-05	1.56643e-08	0.00310475	0.000736905	3.04283e-05	1.432	0.450384	0.00157711	0.24613	0.00537793
SL006922	RAD51	cg06915472	0.0023141	0.000643963	0.000361909	-0.000265473	3.85261e-05	1.86212e-11	0.00294076	0.000670757	1.44844e-05	2.36053	0.777469	0.00253418	0.270799	0.00546236
SL005200	MICB	cg21684411	0.00502956	0.00119425	3.05953e-05	-0.00071995	9.45224e-05	1.52037e-13	0.00377	0.00125727	0.00286159	-1.74951	0.587259	0.00304582	0.250432	0.00552964
SL000316	C4	cg20640261	0.00345375	0.000902977	0.000149105	-0.00116404	0.00011967	1.92538e-20	0.00463276	0.000984532	3.3665e-06	1.01286	0.350925	0.00408445	0.341369	0.00565727
SL000316	C4	cg20640261	0.00345375	0.000902977	0.000149105	-0.00116404	0.00011967	1.92538e-20	0.00463276	0.000984532	3.3665e-06	1.01286	0.350925	0.00408445	0.341369	0.00565727
SL014008	FUT5	cg25692507	0.00729715	0.00101363	2.50156e-12	-0.000351488	9.44186e-05	0.000221678	0.00801377	0.00101123	1.76137e-14	2.03882	0.493044	4.22155e-05	0.0982053	0.00566283
SL011533	SGTA	cg05655089	-0.00969698	0.0025289	0.000143452	-0.000865788	0.00014926	1.23407e-08	-0.00756059	0.00259505	0.00374963	2.46757	0.784107	0.00175748	0.220315	0.00567291
SL000440	Hemopexin	cg04488853	0.00569168	0.00179685	0.00163982	-0.000307656	7.91123e-05	0.000115629	0.00695546	0.00179812	0.000125579	4.10775	1.04493	9.76549e-05	0.222038	0.00569834
SL012783	WFKN1	cg06161600	-0.00230958	0.000844852	0.00650562	-0.00191028	0.000193624	6.07921e-21	-0.00119601	0.000923153	0.195779	0.582935	0.202501	0.00418122	1	0.00571948
SL000458	IFN-g R1	cg17657394	0.00197595	0.000646972	0.00239028	0.000701376	7.62957e-05	1.40426e-18	0.00117196	0.000699167	0.0943867	1.14631	0.395633	0.00394587	1	0.00572034
SL004209	annexin II	cg23938300	0.00520034	0.0010573	1.21771e-06	0.000593511	7.02207e-05	3.84549e-16	0.00398965	0.00112752	0.000443682	2.03987	0.697832	0.00363696	0.232809	0.00573421
SL004915	NCC27	cg17810099	-0.0071386	0.00266416	0.0076389	-0.00074937	0.000130676	1.77734e-08	-0.00491345	0.00273172	0.0727312	2.96936	0.943519	0.00175671	1	0.00579874
SL000316	C4	cg17961273	0.00345375	0.000902977	0.000149105	-0.00103243	8.71329e-05	2.05266e-28	0.00486473	0.00102504	2.7863e-06	1.36665	0.482122	0.00479208	0.408535	0.00583576
SL000316	C4	cg17961273	0.00345375	0.000902977	0.000149105	-0.00103243	8.71329e-05	2.05266e-28	0.00486473	0.00102504	2.7863e-06	1.36665	0.482122	0.00479208	0.408535	0.00583576
SL005171	IGFBP-4	cg05347914	0.00333642	0.000643607	3.26812e-07	-0.000489977	5.95777e-05	2.05847e-15	0.00405378	0.000683978	6.0999e-09	1.46407	0.501221	0.0036621	0.215009	0.00591334
SL000316	C4	cg09782889	0.00345375	0.000902977	0.000149105	-0.000651841	7.36677e-05	1.97981e-17	0.00452971	0.000969746	3.954e-06	1.65063	0.57003	0.00396571	0.311531	0.00592187
SL000316	C4	cg09782889	0.00345375	0.000902977	0.000149105	-0.000651841	7.36677e-05	1.97981e-17	0.00452971	0.000969746	3.954e-06	1.65063	0.57003	0.00396571	0.311531	0.00592187
SL000316	C4	cg16598405	0.00345375	0.000902977	0.000149105	-0.000580218	6.76265e-05	1.51026e-16	0.00449927	0.000965441	4.15532e-06	1.80193	0.620927	0.00388825	0.302717	0.00597761
SL000316	C4	cg16598405	0.00345375	0.000902977	0.000149105	-0.000580218	6.76265e-05	1.51026e-16	0.00449927	0.000965441	4.15532e-06	1.80193	0.620927	0.00388825	0.302717	0.00597761
SL000316	C4	cg11439393	0.00345375	0.000902977	0.000149105	-0.000559687	9.98277e-05	3.58522e-08	0.00419507	0.000924599	7.30816e-06	1.32452	0.419944	0.00171711	0.214641	0.00597939
SL000316	C4	cg11439393	0.00345375	0.000902977	0.000149105	-0.000559687	9.98277e-05	3.58522e-08	0.00419507	0.000924599	7.30816e-06	1.32452	0.419944	0.00171711	0.214641	0.00597939
SL014009	HDGR2	cg08664323	0.00433966	0.000955934	7.21352e-06	0.0002797	4.98717e-05	3.54142e-08	0.0051225	0.000978762	2.54033e-07	-2.79888	0.887996	0.00172897	0.180394	0.00600126
SL000414	Factor B	cg11431261	0.00161112	0.000502062	0.00142606	-0.000427586	8.17564e-05	2.59048e-07	0.00200456	0.00051166	0.000103134	0.920125	0.284955	0.00133227	0.244198	0.00600444
SL004354	IL-19	cg23088126	-0.001586	0.000544301	0.00374577	0.000834739	8.22372e-05	5.80902e-22	-0.00231867	0.000597996	0.00012113	0.877725	0.307548	0.00451504	0.461961	0.0060067
SL004081	Bone proteoglycan II	cg04957307	0.00235489	0.000784257	0.0028224	0.000564402	8.47206e-05	7.7709e-11	0.00162536	0.000814219	0.0465032	1.29257	0.428781	0.00271715	0.309793	0.00602487
SL016928	SLAF7	cg11912330	0.00621455	0.00127983	1.6553e-06	0.000363889	5.19827e-05	9.28877e-12	0.0049673	0.00133578	0.000225523	3.42756	1.14804	0.00298446	0.200698	0.00602842
SL010519	ZAP70	cg09350013	0.00425238	0.000835343	5.23873e-07	0.000538343	9.77273e-05	6.06767e-08	0.00492975	0.00085435	1.46975e-08	-1.25824	0.397231	0.00164138	0.15929	0.00603399
SL004733	sLRP1	cg21045306	0.00327076	0.000845016	0.000124461	-0.000617872	0.000138598	1.04366e-05	0.00266254	0.000852927	0.00191346	-0.984386	0.282698	0.000545743	0.185958	0.00606587
SL000089	TGF-b3	cg13079247	0.0021896	0.000782384	0.00535016	-0.000351257	5.94883e-05	6.92089e-09	0.00152506	0.000804248	0.0585614	-1.89189	0.61083	0.00207434	1	0.00609159
SL004362	SCGF-alpha	cg07798605	0.00342982	0.00091736	0.00020837	-0.00118759	0.000151434	3.151e-14	0.0024547	0.000969182	0.0116515	-0.821097	0.281064	0.00365779	0.284308	0.00618887
SL010458	Endocan	cg05425754	0.00415216	0.000795312	2.7125e-07	0.00068869	7.44611e-05	8.78074e-19	0.00513153	0.000859934	4.85364e-09	-1.42208	0.496271	0.0043559	0.235871	0.00619692
SL000507	Lymphotoxin a1/b2	cg07481886	-0.00313023	0.000605886	3.57809e-07	-0.000713661	0.000141449	6.55376e-07	-0.00266884	0.000616149	1.8244e-05	0.646507	0.198728	0.00122618	0.147397	0.00625458
SL000507	Lymphotoxin a1/b2	cg07481886	-0.00313023	0.000605886	3.57809e-07	-0.000713661	0.000141449	6.55376e-07	-0.00266884	0.000616149	1.8244e-05	0.646507	0.198728	0.00122618	0.147397	0.00625458
SL003184	sLeptin R	cg04704294	0.00473148	0.00175927	0.00741871	0.000708371	0.000133846	1.87748e-07	0.00335556	0.00179445	0.0621291	1.94238	0.608765	0.00151729	1	0.00628527
SL004672	BCMA	cg01223986	0.00393033	0.000664403	6.48892e-09	-0.000558591	6.72875e-05	1.17083e-15	0.00319035	0.000707071	8.17882e-06	-1.32472	0.458216	0.00402319	0.188273	0.00632944
SL005191	ILT-4	cg15627251	0.00469515	0.000647034	1.72262e-12	-0.000209673	5.25368e-05	7.66586e-05	0.00424897	0.00064905	1.59278e-10	-2.12798	0.568692	0.000206009	0.0950299	0.00633867
SL005200	MICB	cg08972588	0.00502956	0.00119425	3.05953e-05	-0.00115689	0.00014968	7e-14	0.00628182	0.00125988	8.78532e-07	1.08244	0.370996	0.0037018	0.248979	0.00634038
SL000414	Factor B	cg27449793	0.00161112	0.000502062	0.00142606	-0.000324725	7.55179e-05	2.09143e-05	0.0019632	0.000505861	0.000119486	1.08424	0.307841	0.000471494	0.218531	0.00643554
SL000678	Granulysin	cg05486094	0.00543645	0.00107012	5.49814e-07	-0.00062002	7.81168e-05	1.6079e-14	0.00429458	0.00113222	0.000168786	-1.84166	0.634991	0.00390787	0.210039	0.00644724
SL004594	Troponin I, skeletal, fast twitch	cg16657886	0.00700017	0.00153944	6.9748e-06	-0.000752312	9.29495e-05	5.30388e-15	0.0053257	0.00163316	0.0011937	-2.22577	0.769399	0.00400058	0.239204	0.00644778
SL002823	sL-Selectin	cg06816239	-0.00381713	0.00057374	8.20979e-11	0.000847241	0.000156488	9.95963e-08	-0.00336425	0.000586132	1.7294e-08	-0.534532	0.169672	0.00173762	0.118643	0.00647029
SL004556	DAF	cg21110645	0.00564618	0.00050992	2.12139e-25	-0.000627188	0.000121563	3.70398e-07	0.00603715	0.000519337	1.56993e-27	0.623364	0.194466	0.0014431	0.0692444	0.00647336
SL000017	vWF	cg11384427	0.00683016	0.00172313	8.55537e-05	0.00097042	9.97721e-05	1.88698e-20	0.00462657	0.00187837	0.0141425	2.27075	0.800875	0.00478073	0.322626	0.00648798
SL008835	ASGR1	cg00901493	0.00378884	0.000825355	5.72401e-06	0.000212568	5.07796e-05	3.40666e-05	0.00321664	0.00083036	0.000122881	2.69184	0.751461	0.000377527	0.151022	0.00649528
SL003184	sLeptin R	cg09235539	0.00473148	0.00175927	0.00741871	0.00115272	0.000106449	1.76633e-24	0.0072146	0.00195742	0.000255438	-2.15414	0.767337	0.00521018	0.524809	0.00657852
SL000382	CK-MB	cg14191466	-0.00766185	0.00165003	4.4849e-06	-0.000557639	0.000131784	2.80715e-05	-0.00880502	0.00166116	1.8024e-07	-2.05003	0.578422	0.000434487	0.149204	0.00658713
SL008122	DUS3	cg08090640	-0.00699607	0.00240753	0.00383933	-0.00174989	0.000125361	3.78206e-37	-0.00268067	0.00285371	0.348041	2.4661	0.890926	0.00586897	1	0.00662461
SL000316	C4	cg19577206	0.00345375	0.000902977	0.000149105	-0.00104405	0.000124294	5.74377e-16	0.00446586	0.000962848	4.60355e-06	0.969403	0.337908	0.0043119	0.293046	0.00663021
SL000316	C4	cg19577206	0.00345375	0.000902977	0.000149105	-0.00104405	0.000124294	5.74377e-16	0.00446586	0.000962848	4.60355e-06	0.969403	0.337908	0.0043119	0.293046	0.00663021
SL007631	SOST	cg18647570	0.0147447	0.00102169	3.49585e-39	-0.00120084	0.000103639	2.11003e-27	0.0132118	0.00115331	6.97645e-27	-1.2766	0.457266	0.00546101	0.103969	0.00664479
SL000459	IgA	cg16321608	0.00733032	0.00114964	4.44032e-10	-0.000236926	4.77843e-05	1.00368e-06	0.00647543	0.00116802	5.00918e-08	-3.60827	1.1127	0.00127028	0.116624	0.00664954
SL000459	IgA	cg16321608	0.00733032	0.00114964	4.44032e-10	-0.000236926	4.77843e-05	1.00368e-06	0.00647543	0.00116802	5.00918e-08	-3.60827	1.1127	0.00127028	0.116624	0.00664954
SL000316	C4	cg14931776	0.00345375	0.000902977	0.000149105	-0.000896734	0.000213297	3.15625e-05	0.00407788	0.000908824	9.16629e-06	0.695993	0.195981	0.000423339	0.180708	0.00666861
SL000316	C4	cg14931776	0.00345375	0.000902977	0.000149105	-0.000896734	0.000213297	3.15625e-05	0.00407788	0.000908824	9.16629e-06	0.695993	0.195981	0.000423339	0.180708	0.00666861
SL000414	Factor B	cg13511576	0.00161112	0.000502062	0.00142606	-0.000271652	4.4981e-05	3.21961e-09	0.00203891	0.000517146	9.33174e-05	1.57477	0.518602	0.00253067	0.265522	0.00666904
SL005165	Galectin-4	cg11708454	0.00322698	0.00115131	0.00527976	0.000992581	0.000151925	1.71479e-10	0.00218821	0.00119354	0.0673958	1.04654	0.351095	0.00302849	1	0.00669036
SL000408	Epo	cg13210467	0.00454535	0.00115058	9.03419e-05	0.00153766	0.000147595	6.08548e-23	0.00610907	0.00127066	2.07727e-06	-1.01695	0.362337	0.00522118	0.344026	0.00672809
SL000678	Granulysin	cg22242842	0.00543645	0.00107012	5.49814e-07	-0.0012772	8.41997e-05	2.11328e-42	0.00336299	0.00130233	0.0101251	-1.62345	0.589644	0.00613536	0.3814	0.00674848
SL009045	ENPP7	cg02164741	0.00535713	0.00178297	0.00280503	-0.000567223	6.10492e-05	6.20161e-19	0.00318437	0.00192907	0.0994806	-3.83052	1.35437	0.00488583	1	0.00681634
SL000507	Lymphotoxin a1/b2	cg08469255	-0.00313023	0.000605886	3.57809e-07	0.0011439	0.000111028	1.63215e-22	-0.00231591	0.000667843	0.000574853	-0.711881	0.253923	0.00527124	0.260148	0.00682704
SL000507	Lymphotoxin a1/b2	cg08469255	-0.00313023	0.000605886	3.57809e-07	0.0011439	0.000111028	1.63215e-22	-0.00231591	0.000667843	0.000574853	-0.711881	0.253923	0.00527124	0.260148	0.00682704
SL004915	NCC27	cg15398152	-0.0071386	0.00266416	0.0076389	-0.000503579	0.000112857	1.02276e-05	-0.00527192	0.00269063	0.050678	3.70684	1.09056	0.000735549	1	0.00685354
SL011448	TNR4	cg16252905	0.00234817	0.000846543	0.00576874	-0.000296749	6.6808e-05	1.12234e-05	0.00175321	0.000854832	0.0408489	-2.00495	0.588499	0.000715842	0.253374	0.00686577
SL005491	OBCAM	cg03820608	-0.00365208	0.000707847	3.70258e-07	-0.000665551	9.86437e-05	4.59247e-11	-0.0029979	0.000736149	5.48803e-05	0.982918	0.333235	0.00334565	0.179126	0.00687911
SL004726	CD97	cg26487562	0.0031131	0.000591494	2.18485e-07	0.000238981	4.60859e-05	3.24459e-07	0.0035634	0.00060275	6.64296e-09	-1.88429	0.595175	0.00164966	0.144649	0.0068896
SL001947	MIA	cg11298343	0.00234237	0.000730485	0.00143741	-0.000363249	0.000104974	0.00059007	0.002844	0.00072607	0.000103391	1.38096	0.31939	1.88542e-05	0.214156	0.00689916
SL002093	Histone H2A.z	cg05319305	0.0030263	0.00108793	0.00563278	0.000832109	0.000101607	2.6837e-15	0.00183905	0.00115641	0.112461	1.42679	0.498587	0.00440923	1	0.00690288
SL000509	Lymphotoxin b R	cg26515676	0.00263633	0.000807293	0.00117448	-0.000263001	3.95714e-05	8.60192e-11	0.00337102	0.000838446	6.79555e-05	2.79349	0.9474	0.00335662	0.27868	0.00703356
SL005200	MICB	cg14801238	0.00502956	0.00119425	3.05953e-05	0.000564862	0.000159937	0.000454894	0.00421953	0.00118929	0.000428655	1.43404	0.343921	3.65448e-05	0.161055	0.00703955
SL014735	IMDH1	cg16494530	0.00516871	0.00180983	0.00448694	0.000693955	8.28818e-05	6.94029e-16	0.00316668	0.00192877	0.101318	2.88495	1.01361	0.00462386	1	0.00704387
SL000437	Haptoglobin, Mixed Type	cg03382246	0.00449151	0.00147632	0.00248235	-0.000239651	4.29089e-05	4.01494e-08	0.00331573	0.00151193	0.0288086	-4.9062	1.59473	0.00222048	0.261778	0.0070447
SL003643	Glutathione S-transferase Pi	cg13447964	0.00745587	0.0014225	2.43742e-07	0.000414101	7.55953e-05	7.11421e-08	0.00633955	0.0014548	1.62481e-05	2.69577	0.871155	0.00209256	0.149724	0.00705369
SL005218	Siglec-7	cg14496375	0.00454039	0.000583299	4.75721e-14	-0.000489486	9.09219e-05	1.17089e-07	0.00499308	0.000595921	6.71059e-16	0.924827	0.297616	0.00200526	0.099703	0.00711752
SL004672	BCMA	cg10379077	0.00393033	0.000664403	6.48892e-09	-0.000428201	8.81082e-05	1.61675e-06	0.00344749	0.000674433	4.70684e-07	-1.1276	0.349158	0.00132978	0.122849	0.00715035
SL008623	CNTN2	cg11199506	0.00612979	0.000933543	1.403e-10	-0.000505949	6.76554e-05	3.86885e-13	0.00706274	0.000981101	2.5132e-12	1.84395	0.639678	0.0041298	0.152198	0.00715135
SL000414	Factor B	cg19109439	0.00161112	0.000502062	0.00142606	-0.000267651	5.50687e-05	1.6161e-06	0.00197671	0.000509679	0.00012071	1.36592	0.423053	0.00133361	0.226916	0.00715835
SL000467	IgG	cg15352829	0.00158342	0.000605552	0.00922611	0.000899432	0.000105747	2.68499e-16	0.000901328	0.000647286	0.164467	0.758354	0.267567	0.00479999	1	0.00716894
SL005188	IL-5 Ra	cg01310029	0.00552817	0.00103406	1.42231e-07	-0.000437349	6.63767e-05	1.22271e-10	0.00459745	0.00107309	2.23739e-05	-2.12808	0.722699	0.00339866	0.168359	0.00718009
SL002517	TNF-a	cg16598405	0.00209346	0.00076135	0.00620318	-0.000589022	6.73409e-05	4.28837e-17	0.00296858	0.000816636	0.000309625	1.48572	0.526011	0.00494377	0.418028	0.0071914
SL004733	sLRP1	cg09371693	0.00327076	0.000845016	0.000124461	-0.00037116	4.69687e-05	2.09063e-14	0.002382	0.000894226	0.00800294	-2.39457	0.837772	0.00445614	0.271731	0.00719163
SL000414	Factor B	cg27198696	0.00161112	0.000502062	0.00142606	-0.00104176	8.75151e-05	1.24482e-28	0.00237859	0.000570817	3.69634e-05	0.7367	0.267015	0.0060318	0.476353	0.0071931
SL000507	Lymphotoxin a1/b2	cg21440587	-0.00313023	0.000605886	3.57809e-07	0.000363508	5.32477e-05	2.78755e-11	-0.0025682	0.000630953	5.53698e-05	-1.54613	0.529073	0.00364761	0.179549	0.00721974
SL000507	Lymphotoxin a1/b2	cg21440587	-0.00313023	0.000605886	3.57809e-07	0.000363508	5.32477e-05	2.78755e-11	-0.0025682	0.000630953	5.53698e-05	-1.54613	0.529073	0.00364761	0.179549	0.00721974
SL002517	TNF-a	cg07257768	0.00209346	0.00076135	0.00620318	-0.000865755	0.000117329	7.63945e-13	0.00133991	0.000799215	0.0943212	-0.870388	0.301793	0.00411251	1	0.00722764
SL000420	Ferritin	cg05262463	0.00836845	0.00229777	0.00030145	0.000663841	8.18025e-05	4.50723e-15	0.00590732	0.00243859	0.015805	3.70741	1.30247	0.00461983	0.294097	0.00723096
SL000316	C4	cg13808979	0.00345375	0.000902977	0.000149105	-0.000670054	0.00019701	0.000730301	0.00407195	0.000896652	7.17335e-06	0.922609	0.210707	1.48394e-05	0.178993	0.00723099
SL000316	C4	cg13808979	0.00345375	0.000902977	0.000149105	-0.000670054	0.00019701	0.000730301	0.00407195	0.000896652	7.17335e-06	0.922609	0.210707	1.48394e-05	0.178993	0.00723099
SL001777	Cystatin C	cg00681003	0.00821357	0.000552298	4.40375e-41	-0.00144523	0.000319195	7.61556e-06	0.00782853	0.000558429	2.21808e-37	-0.266418	0.0800617	0.000946683	0.046878	0.00733207
SL012395	NET1	cg24092340	0.00983546	0.000835842	4.25248e-28	0.000448076	7.5999e-05	7.26354e-09	0.00914699	0.000859553	9.12723e-24	1.53651	0.51054	0.00276144	0.0699991	0.00735038
SL010450	CD48	cg08246428	0.00545014	0.000606665	6.90733e-18	-0.000559341	8.41048e-05	8.35828e-11	0.0049021	0.000630146	4.91462e-14	-0.97979	0.334658	0.00358529	0.100555	0.0073716
SL004145	HVEM	cg00695391	0.00272435	0.00071403	0.00015476	-0.00150411	0.000131439	8.13748e-27	0.00377344	0.00080467	3.63178e-06	0.697483	0.253124	0.00609644	0.38508	0.00738573
SL009324	FSTL3	cg12068124	0.0103106	0.000561419	7.99793e-57	-0.000799335	6.90712e-05	2.43501e-27	0.0111412	0.000633858	3.49789e-53	1.03917	0.37751	0.0061465	0.0805623	0.00740676
SL000428	FSH	cg04719819	0.0363179	0.00193302	8.39055e-59	0.000457646	5.76075e-05	1.52879e-14	0.0383434	0.00204613	1.50781e-58	-4.42575	1.55593	0.00464857	0.0557694	0.00740719
SL005200	MICB	cg01573622	0.00502956	0.00119425	3.05953e-05	-0.000296027	7.36433e-05	6.81832e-05	0.00582708	0.00119971	1.64236e-06	2.69408	0.750512	0.000367185	0.158566	0.00741829
SL000344	Cathepsin D	cg09575189	0.00726572	0.00112617	2.85095e-10	-0.000461507	5.31984e-05	7.50127e-17	0.00854938	0.00120711	5.46932e-12	2.78145	0.988181	0.00509567	0.176673	0.00742134
SL010520	AURKB	cg26967415	0.00265883	0.000680681	0.000108051	-0.000368858	3.88087e-05	1.17053e-19	0.00181802	0.000739825	0.0143698	-2.27948	0.817083	0.00549681	0.316232	0.00743175
SL000316	C4	cg04603811	0.00345375	0.000902977	0.000149105	-0.000589258	0.000120189	1.31705e-06	0.00411016	0.000917289	9.42543e-06	1.11395	0.348705	0.00149805	0.190056	0.00743929
SL000316	C4	cg04603811	0.00345375	0.000902977	0.000149105	-0.000589258	0.000120189	1.31705e-06	0.00411016	0.000917289	9.42543e-06	1.11395	0.348705	0.00149805	0.190056	0.00743929
SL007429	GPNMB	cg01500527	0.00224382	0.000649328	0.000600333	-0.000259	5.18923e-05	8.55136e-07	0.00176784	0.000660283	0.00768745	-1.83776	0.579621	0.00162358	0.21213	0.00744441
SL012698	KI2L4	cg01434523	0.00385599	0.00150065	0.0104987	0.00045618	8.56435e-05	1.57283e-07	0.00500114	0.00153216	0.00118045	-2.51031	0.811194	0.0020918	0.296981	0.00745557
SL000316	C4	cg07810190	0.00345375	0.000902977	0.000149105	0.00062381	0.000127386	1.35429e-06	0.00279807	0.000917233	0.00241796	1.0511	0.329002	0.0014967	0.189847	0.00745671
SL000316	C4	cg07810190	0.00345375	0.000902977	0.000149105	0.00062381	0.000127386	1.35429e-06	0.00279807	0.000917233	0.00241796	1.0511	0.329002	0.0014967	0.189847	0.00745671
SL000678	Granulysin	cg27432242	0.00543645	0.00107012	5.49814e-07	0.000630313	9.56451e-05	1.21094e-10	0.00448013	0.00111057	6.42449e-05	1.51722	0.518537	0.00360503	0.175909	0.00749024
SL005102	SHBG	cg03508063	0.00429326	0.00120378	0.000399889	-0.000828014	8.13188e-05	4.35877e-22	0.00271931	0.0013235	0.0404824	-1.90088	0.686733	0.00586911	0.366611	0.00756094
SL005200	MICB	cg06126421	0.00502956	0.00119425	3.05953e-05	-0.00109079	0.00016188	4.86334e-11	0.00611812	0.00124228	1.18384e-06	0.997961	0.343055	0.00380335	0.216433	0.00756767
SL004153	M-CSF R	cg11716665	0.00315572	0.000731261	1.95386e-05	0.000252662	5.25356e-05	2.0593e-06	0.00367847	0.000742024	1.00955e-06	-2.06898	0.644592	0.00142225	0.165652	0.00759026
SL004298	granzyme A	cg18526607	0.00349307	0.00064455	9.69641e-08	0.000404393	6.46952e-05	9.37744e-10	0.0029416	0.000665947	1.2505e-05	1.36371	0.462163	0.00333381	0.157876	0.00762271
SL000459	IgA	cg06752633	0.00733032	0.00114964	4.44032e-10	-0.000416215	5.58797e-05	4.7374e-13	0.00619566	0.00120787	4.30286e-07	-2.72615	0.953905	0.00445958	0.15479	0.00762551
SL000459	IgA	cg06752633	0.00733032	0.00114964	4.44032e-10	-0.000416215	5.58797e-05	4.7374e-13	0.00619566	0.00120787	4.30286e-07	-2.72615	0.953905	0.00445958	0.15479	0.00762551
SL005200	MICB	cg26343358	0.00502956	0.00119425	3.05953e-05	0.00103675	0.000209989	1.11479e-06	0.00416299	0.00121385	0.000659708	0.835862	0.264016	0.00164982	0.172297	0.00769712
SL000510	Lysozyme	cg09939079	0.00291828	0.000434462	5.5403e-11	-0.000922207	0.000133543	1.68475e-11	0.00251566	0.000452982	4.76765e-08	-0.436588	0.151139	0.00405368	0.137966	0.00770127
SL000414	Factor B	cg12753631	0.00161112	0.000502062	0.00142606	-0.000338147	5.6694e-05	4.93547e-09	0.00202518	0.00051688	0.000102999	1.22448	0.411624	0.00308852	0.256998	0.00776699
SL005200	MICB	cg09423875	0.00502956	0.00119425	3.05953e-05	-0.000508071	8.78184e-05	1.34687e-08	0.00599164	0.00122669	1.44039e-06	1.89359	0.632021	0.00288434	0.191285	0.00780233
SL014008	FUT5	cg19873021	0.00729715	0.00101363	2.50156e-12	-0.000252377	6.38921e-05	9.0449e-05	0.00796162	0.00101757	3.57723e-14	2.63284	0.731826	0.000356184	0.0910584	0.00781897
SL000507	Lymphotoxin a1/b2	cg23953820	-0.00313023	0.000605886	3.57809e-07	0.00106932	0.000105687	7.70268e-22	-0.00234388	0.000665781	0.000474255	-0.73538	0.266832	0.00608743	0.251213	0.00783532
SL000507	Lymphotoxin a1/b2	cg23953820	-0.00313023	0.000605886	3.57809e-07	0.00106932	0.000105687	7.70268e-22	-0.00234388	0.000665781	0.000474255	-0.73538	0.266832	0.00608743	0.251213	0.00783532
SL000316	C4	cg06804823	0.00345375	0.000902977	0.000149105	-0.00153246	0.00016532	7.51612e-19	0.00453426	0.000977392	4.58321e-06	0.705079	0.254199	0.00577022	0.312849	0.00787669
SL000316	C4	cg06804823	0.00345375	0.000902977	0.000149105	-0.00153246	0.00016532	7.51612e-19	0.00453426	0.000977392	4.58321e-06	0.705079	0.254199	0.00577022	0.312849	0.00787669
SL000064	Kallikrein 7	cg27021492	-0.0039735	0.000825654	2.02678e-06	0.000695138	0.000177139	0.000100353	-0.00343388	0.000828601	4.06437e-05	-0.776272	0.21499	0.000339123	0.135804	0.00788134
SL000062	PSA	cg08854169	0.0052903	0.00161788	0.00115699	-0.000317848	4.44143e-05	3.31051e-12	0.0068262	0.00169271	6.46079e-05	4.83219	1.68892	0.00441522	0.290324	0.0078919
SL008591	TFF1	cg11110978	0.013346	0.00177516	2.951e-13	-0.000415185	6.83068e-05	2.56101e-09	0.0118693	0.00183	2.294e-10	-3.55674	1.20423	0.00330353	0.110648	0.0078952
SL000458	IFN-g R1	cg20336981	0.00197595	0.000646972	0.00239028	0.000632729	8.90253e-05	4.64166e-12	0.0013614	0.000676796	0.0448631	0.971276	0.339133	0.00437849	0.311017	0.00789733
SL005171	IGFBP-4	cg03679521	0.00333642	0.000643607	3.26812e-07	0.000598471	9.06121e-05	1.10892e-10	0.00276416	0.000668224	4.19817e-05	0.956216	0.329595	0.00389741	0.171521	0.00790209
SL004126	4-1BB	cg13866134	0.00341222	0.000769818	1.16934e-05	-0.000136037	3.55528e-05	0.000148272	0.00391444	0.00077153	5.70574e-07	3.69182	1.00244	0.000258501	0.147185	0.00796756
SL000507	Lymphotoxin a1/b2	cg23328335	-0.00313023	0.000605886	3.57809e-07	-0.000702308	8.34792e-05	5.21535e-16	-0.00246743	0.000646489	0.000154024	0.943744	0.337739	0.00542145	0.211741	0.00800522
SL000507	Lymphotoxin a1/b2	cg23328335	-0.00313023	0.000605886	3.57809e-07	-0.000702308	8.34792e-05	5.21535e-16	-0.00246743	0.000646489	0.000154024	0.943744	0.337739	0.00542145	0.211741	0.00800522
SL000247	6-Phosphogluconate dehydrogenase	cg24298421	-0.0351254	0.00272073	9.74761e-33	0.00121805	0.000107861	2.94289e-26	-0.0312394	0.00305491	3.05334e-22	-3.19036	1.17047	0.00666296	0.110633	0.00805841
SL009045	ENPP7	cg04305399	0.00535713	0.00178297	0.00280503	0.00118723	0.000136436	5.93209e-17	0.00335589	0.00191073	0.0797	1.68564	0.606196	0.00564851	1	0.00807942
SL000316	C4	cg12743359	0.00345375	0.000902977	0.000149105	-0.000204979	6.33006e-05	0.00129094	0.00283647	0.000893721	0.00160695	-3.01148	0.654396	5.43961e-06	0.17873	0.00809072
SL000316	C4	cg12743359	0.00345375	0.000902977	0.000149105	-0.000204979	6.33006e-05	0.00129094	0.00283647	0.000893721	0.00160695	-3.01148	0.654396	5.43961e-06	0.17873	0.00809072
SL000316	C4	cg08463024	0.00345375	0.000902977	0.000149105	-0.000451577	0.000122943	0.000268169	0.00403881	0.000902891	9.75064e-06	1.29559	0.339297	0.000152943	0.169398	0.0081173
SL000316	C4	cg08463024	0.00345375	0.000902977	0.000149105	-0.000451577	0.000122943	0.000268169	0.00403881	0.000902891	9.75064e-06	1.29559	0.339297	0.000152943	0.169398	0.0081173
SL003184	sLeptin R	cg19754554	0.00473148	0.00175927	0.00741871	0.000686968	7.97683e-05	1.17245e-16	0.0066882	0.00188284	0.000421819	-2.84834	1.02416	0.00564115	0.413553	0.00813142
SL002823	sL-Selectin	cg01459453	-0.00381713	0.00057374	8.20979e-11	-0.00165977	0.000146479	2.09197e-26	-0.00299629	0.000644707	4.40122e-06	0.494548	0.181757	0.00675842	0.21504	0.00815187
SL006922	RAD51	cg24883642	0.0023141	0.000643963	0.000361909	-0.000413909	6.28413e-05	1.24816e-10	0.00288458	0.000668641	1.96885e-05	1.37827	0.477092	0.00405132	0.246522	0.00815437
SL005200	MICB	cg25560247	0.00502956	0.00119425	3.05953e-05	-0.000695697	0.000104945	9.58075e-11	0.00396735	0.00124065	0.00148166	-1.52683	0.529251	0.0041018	0.211194	0.00816273
SL000316	C4	cg06169557	0.00345375	0.000902977	0.000149105	-0.00031189	6.47392e-05	1.98202e-06	0.00409266	0.00091669	1.01333e-05	2.04849	0.64751	0.00166265	0.184989	0.00818263
SL000316	C4	cg06169557	0.00345375	0.000902977	0.000149105	-0.00031189	6.47392e-05	1.98202e-06	0.00409266	0.00091669	1.01333e-05	2.04849	0.64751	0.00166265	0.184989	0.00818263
SL003302	Ck-b-8-1	cg22460710	0.00488314	0.000761595	3.60686e-10	0.000509842	6.64737e-05	1.05465e-13	0.00411767	0.000803236	4.38037e-07	1.50138	0.533071	0.00506711	0.156757	0.00819701
SL005200	MICB	cg10573158	0.00502956	0.00119425	3.05953e-05	-0.000198427	3.60747e-05	6.33069e-08	0.00410989	0.00122252	0.000839762	-4.63483	1.53839	0.0027334	0.182854	0.00823289
SL003302	Ck-b-8-1	cg27254338	0.00488314	0.000761595	3.60686e-10	-0.000569435	9.19145e-05	1.30357e-09	0.00424239	0.000786585	1.1144e-07	-1.12522	0.385275	0.00366787	0.131215	0.00824805
SL014009	HDGR2	cg13786089	0.00433966	0.000955934	7.21352e-06	0.00119493	0.000104332	7.13242e-27	0.00295901	0.001077	0.00624413	1.15543	0.425644	0.00688855	0.318147	0.00825739
SL012783	WFKN1	cg02143778	-0.00230958	0.000844852	0.00650562	-0.000350168	7.19779e-05	1.57836e-06	-0.00171104	0.000858156	0.0467623	1.70928	0.543807	0.00178027	0.259153	0.00828855
SL002505	ANP	cg15078958	0.00396435	0.00131945	0.00280631	0.000582427	7.74593e-05	2.95218e-13	0.00526438	0.00138832	0.00016965	-2.23209	0.791687	0.00502122	0.32793	0.00829244
SL007328	JAG1	cg00051068	0.00361759	0.000478219	2.16359e-13	0.000354389	6.34022e-05	3.92481e-08	0.00324607	0.00049007	9.91009e-11	1.04834	0.350172	0.00290557	0.102698	0.00831322
SL014292	SIG14	cg22767164	0.0048865	0.0012065	6.03601e-05	-0.000400702	6.53485e-05	1.91594e-09	0.00590172	0.00124583	2.91959e-06	2.53359	0.866926	0.0036493	0.207759	0.00833547
SL005191	ILT-4	cg19925849	0.00469515	0.000647034	1.72262e-12	0.000899808	0.000123323	1.32173e-12	0.00407443	0.00067857	3.92982e-09	0.689845	0.243831	0.00487289	0.132206	0.00834392
SL001777	Cystatin C	cg10019507	0.00821357	0.000552298	4.40375e-41	0.000578757	0.000126517	6.15611e-06	0.00859126	0.000559067	3.03614e-43	-0.6526	0.202131	0.00133374	0.0459846	0.00834475
SL016928	SLAF7	cg09471611	0.00621455	0.00127983	1.6553e-06	-0.00067482	7.63391e-05	2.15385e-17	0.00475512	0.001376	0.000600668	-2.16269	0.782843	0.00596858	0.23484	0.00836828
SL007674	LY9	cg07369190	0.00223361	0.000754654	0.00323832	0.00090927	0.000116912	4.94245e-14	0.00147064	0.000797	0.065653	0.839101	0.299386	0.00528247	1	0.00837037
SL003310	VEGF	cg17102807	0.00424927	0.00160975	0.00858136	0.00044952	5.07323e-05	1.781e-17	0.00242078	0.00173006	0.16242	4.06767	1.47364	0.00600795	1	0.00840472
SL005200	MICB	cg22278650	0.00502956	0.00119425	3.05953e-05	-0.000595967	9.55788e-05	1.03033e-09	0.00402425	0.0012342	0.00119533	-1.68685	0.581049	0.00387463	0.19988	0.00849233
SL007674	LY9	cg00950718	0.00223361	0.000754654	0.00323832	-0.00115174	0.000110722	6.82663e-23	0.00124269	0.000833275	0.136564	-0.860366	0.316278	0.00677125	1	0.00849385
SL003327	Factor D	cg04601137	0.00826188	0.00065121	8.62886e-32	-0.000540294	0.000119764	8.21121e-06	0.00782031	0.000658777	1.70828e-28	-0.817282	0.252292	0.00128561	0.0534469	0.0085055
SL016128	TXD12	cg19021221	0.00434144	0.000788744	6.19704e-08	0.000333983	7.00281e-05	2.49209e-06	0.00489169	0.000800362	2.11879e-09	-1.64754	0.52235	0.0017166	0.126743	0.00851801
SL001797	Kallikrein 6	cg25653204	0.003778	0.000568646	8.8062e-11	0.000380843	7.01957e-05	9.44077e-08	0.00421064	0.000581714	1.97113e-12	-1.136	0.377686	0.00277869	0.114515	0.00852368
SL005207	NKp46	cg26367719	0.00249152	0.000718363	0.000573988	-0.000567469	6.75715e-05	5.94243e-16	0.00327205	0.000766851	2.41827e-05	1.37547	0.496946	0.00587551	0.313278	0.00856976
SL002517	TNF-a	cg18067840	0.00209346	0.00076135	0.00620318	-0.000810534	0.000132701	2.1668e-09	0.00146375	0.000785517	0.0630478	-0.7769	0.266787	0.00376739	1	0.00857363
SL005200	MICB	cg07898120	0.00502956	0.00119425	3.05953e-05	0.000157549	3.69492e-05	2.44364e-05	0.00424348	0.00120461	0.000470397	4.9894	1.49874	0.000942365	0.156292	0.00868977
SL008099	CAPG	cg22112075	0.0119541	0.000940608	6.58736e-32	-0.000666877	0.000134831	1.06533e-06	0.0112877	0.000956491	3.06962e-28	-0.99927	0.322968	0.00209572	0.0557458	0.00871417
SL007502	ST4S6	cg17831791	0.00401091	0.000464081	9.36471e-17	-0.000187666	4.19047e-05	9.51639e-06	0.0043223	0.00046934	1.20821e-18	1.65926	0.513329	0.00131694	0.0776349	0.00876799
SL004683	Noggin	cg23567690	-0.00278895	0.00114699	0.0154195	0.000825288	0.000102878	8.86642e-15	-0.00160293	0.00121637	0.188235	-1.43709	0.518316	0.00578896	1	0.00877971
SL000414	Factor B	cg01064373	0.00161112	0.000502062	0.00142606	-0.000517117	0.000120446	2.15243e-05	0.00194175	0.000506628	0.00014462	0.639359	0.193316	0.0010167	0.205213	0.00879124
SL003182	Integrin aVb5	cg11359984	0.00343001	0.000804446	2.44607e-05	0.00102492	0.000105725	2.53574e-20	0.00244099	0.000877623	0.00563885	0.964977	0.35461	0.00675431	0.288343	0.0087937
SL008623	CNTN2	cg27511824	0.00612979	0.000933543	1.403e-10	-0.000395	7.26724e-05	8.90626e-08	0.00683252	0.000954943	3.35323e-12	1.77906	0.595116	0.00294575	0.114641	0.00880875
SL002722	CD38	cg23452220	0.00244657	0.000748602	0.00116458	-0.000572018	8.20546e-05	1.11338e-11	0.00175985	0.000781662	0.0248374	-1.20052	0.424919	0.00493258	0.280686	0.00883393
SL007674	LY9	cg15549973	0.00223361	0.000754654	0.00323832	0.000550241	9.01116e-05	2.17868e-09	0.00161477	0.000778513	0.0386229	1.12467	0.388202	0.00394691	0.277058	0.00885876
SL000497	Laminin	cg19196806	0.00574291	0.00106975	1.26467e-07	-0.000587342	0.000111955	2.37775e-07	0.00652778	0.00109179	4.53051e-09	1.33632	0.442581	0.00267467	0.136669	0.00887268
SL005200	MICB	cg18511546	0.00502956	0.00119425	3.05953e-05	-0.000620338	0.000139968	1.17143e-05	0.00423354	0.00120721	0.00049852	-1.28321	0.395886	0.00127714	0.158269	0.00888851
SL002621	Midkine	cg04959790	0.00475601	0.00146643	0.00126806	-0.000864062	8.75625e-05	5.92485e-21	0.00657782	0.00160371	4.85727e-05	2.10843	0.777168	0.00692013	0.383056	0.00889907
SL004347	IL-22	cg08264694	0.0044108	0.00124215	0.000423766	-0.000122311	2.77916e-05	1.34333e-05	0.00358699	0.00125515	0.0044613	-6.73536	2.07141	0.00123292	0.18677	0.008917
SL008904	LYVE1	cg12407978	0.00276773	0.000738291	0.00020065	-0.000204913	4.19628e-05	1.44953e-06	0.00224833	0.000750399	0.00288428	-2.53476	0.818915	0.00208846	0.187665	0.00894047
SL010391	WFKN2	cg16413777	0.001754	0.000714473	0.014461	-0.000444351	4.93913e-05	6.21784e-18	0.00256829	0.000769633	0.00091591	1.83254	0.671218	0.00657471	0.464248	0.00898768
SL000316	C4	cg19154116	0.00345375	0.000902977	0.000149105	-0.000556431	7.22337e-05	8.37424e-14	0.00435273	0.00095305	6.37716e-06	1.6156	0.581769	0.00571248	0.260288	0.00898906
SL000316	C4	cg19154116	0.00345375	0.000902977	0.000149105	-0.000556431	7.22337e-05	8.37424e-14	0.00435273	0.00095305	6.37716e-06	1.6156	0.581769	0.00571248	0.260288	0.00898906
SL005218	Siglec-7	cg01500140	0.00454039	0.000583299	4.75721e-14	-0.000548964	9.43574e-05	1.12322e-08	0.00500112	0.00059962	8.88958e-16	0.839285	0.287124	0.0036387	0.101475	0.00900301
SL008835	ASGR1	cg25151916	0.00378884	0.000825355	5.72401e-06	0.000850516	9.39716e-05	4.1373e-18	0.0028417	0.00089017	0.0015092	1.11361	0.408432	0.0066473	0.249982	0.00903686
SL010378	RET	cg08247887	-0.0087511	0.000979307	1.00469e-17	-0.00066905	0.00015994	3.44975e-05	-0.009385	0.000986983	1.12233e-19	-0.947466	0.283591	0.000903673	0.0724369	0.00904001
SL000316	C4	cg10703453	0.00345375	0.000902977	0.000149105	-0.000319976	7.76638e-05	4.50155e-05	0.00403489	0.000909376	1.1462e-05	1.81619	0.538971	0.000816583	0.168263	0.00909665
SL000316	C4	cg10703453	0.00345375	0.000902977	0.000149105	-0.000319976	7.76638e-05	4.50155e-05	0.00403489	0.000909376	1.1462e-05	1.81619	0.538971	0.000816583	0.168263	0.00909665
SL007274	EFNB2	cg12441694	0.00392025	0.000553275	5.27448e-12	-0.000659813	8.15376e-05	5.3432e-15	0.00334737	0.000587367	2.16641e-08	-0.868237	0.315149	0.00610395	0.146132	0.00910717
SL000507	Lymphotoxin a1/b2	cg21691893	-0.00313023	0.000605886	3.57809e-07	-0.000943054	7.43957e-05	9.55306e-32	-0.00217732	0.000700122	0.0019892	1.01045	0.379268	0.0079914	0.304422	0.00912714
SL000507	Lymphotoxin a1/b2	cg21691893	-0.00313023	0.000605886	3.57809e-07	-0.000943054	7.43957e-05	9.55306e-32	-0.00217732	0.000700122	0.0019892	1.01045	0.379268	0.0079914	0.304422	0.00912714
SL008574	OMD	cg10272601	0.00365383	0.00103152	0.000437506	0.000467314	5.35483e-05	4.89977e-17	0.00251273	0.00110621	0.0235826	2.44184	0.893833	0.00654144	0.312304	0.00913082
SL011809	XTP3A	cg03890691	0.0047245	0.000700749	4.75873e-11	0.00224206	0.000226526	4.81434e-21	0.00559786	0.000767357	1.34592e-12	-0.389536	0.144187	0.0071595	0.184858	0.00915375
SL014292	SIG14	cg27347523	0.0048865	0.0012065	6.03601e-05	-0.000460569	0.000174439	0.00857426	0.00681879	0.000967734	7.03977e-12	4.19544	0.260661	2.88196e-46	0.395434	0.00917513
SL004645	HAI-1	cg02349578	-0.00517781	0.000784259	1.13881e-10	0.000655526	0.000107604	2.388e-09	-0.00582024	0.000809307	2.68093e-12	0.980024	0.340078	0.0041433	0.124074	0.00918725
SL000497	Laminin	cg25021590	0.00574291	0.00106975	1.26467e-07	0.000268657	5.0894e-05	2.01248e-07	0.00495957	0.00109235	7.19528e-06	2.91576	0.973729	0.00289881	0.136401	0.0091993
SL007310	RAC3	cg14679235	-0.00562849	0.00230917	0.0151709	-0.000652047	0.000149409	1.57843e-05	-0.00411658	0.00233257	0.0782617	2.31872	0.71479	0.00126539	1	0.00922835
SL000588	TMA	cg09118932	0.00227991	0.000913479	0.0129199	0.0003037	5.67534e-05	1.39023e-07	0.00160205	0.000933839	0.0869286	2.23201	0.749758	0.00306747	1	0.00928174
SL000316	C4	cg20069688	0.00345375	0.000902977	0.000149105	-0.00060048	6.87826e-05	4.86865e-17	0.00445284	0.000968875	5.59235e-06	1.6638	0.611159	0.00673093	0.289274	0.00935114
SL000316	C4	cg20069688	0.00345375	0.000902977	0.000149105	-0.00060048	6.87826e-05	4.86865e-17	0.00445284	0.000968875	5.59235e-06	1.6638	0.611159	0.00673093	0.289274	0.00935114
SL000316	C4	cg26858414	0.00345375	0.000902977	0.000149105	-0.000704886	0.000133203	1.88667e-07	0.00411626	0.000922378	1.02218e-05	0.939875	0.31508	0.00300844	0.191822	0.00936164
SL000316	C4	cg26858414	0.00345375	0.000902977	0.000149105	-0.000704886	0.000133203	1.88667e-07	0.00411626	0.000922378	1.02218e-05	0.939875	0.31508	0.00300844	0.191822	0.00936164
SL014268	OX2G	cg25711003	0.00159982	0.000574712	0.00559834	-0.00145171	0.00015981	3.21705e-18	0.00225882	0.000620343	0.000302573	0.453946	0.167429	0.00695676	0.411922	0.00937627
SL005200	MICB	cg13031097	0.00502956	0.00119425	3.05953e-05	-0.000869398	0.000152102	1.97662e-08	0.0041038	0.00122631	0.000886536	-1.06484	0.365093	0.00371387	0.184065	0.00937828
SL006924	ART	cg10281889	-0.00377746	0.000646691	9.85121e-09	-0.000723843	0.000131707	6.47242e-08	-0.00426303	0.000662184	3.07581e-10	-0.670816	0.22778	0.00339447	0.128543	0.00943659
SL010519	ZAP70	cg10583000	0.00425238	0.000835343	5.23873e-07	0.000296921	4.79709e-05	1.34967e-09	0.00494038	0.000863091	1.89492e-08	-2.31708	0.810884	0.00446694	0.161789	0.00947688
SL008380	CATZ	cg21331324	0.0065145	0.000725539	7.12947e-18	-0.000460426	9.64087e-05	2.41352e-06	0.00601884	0.000736545	3.01036e-15	-1.07652	0.348415	0.00212533	0.0760855	0.00948151
SL007173	GRN	cg03039218	0.00157572	0.000535651	0.00343083	0.00092125	0.000198277	4.4318e-06	0.0012144	0.000543	0.0258066	0.392211	0.125446	0.00188239	0.229307	0.0094885
SL005764	sCD163	cg05712073	0.00783328	0.000903022	7.28559e-17	-0.000407877	7.11072e-05	1.76257e-08	0.00853153	0.000927375	1.28529e-18	1.71191	0.588632	0.00381115	0.0891388	0.00948856
SL008644	BST1	cg25215230	-0.00305777	0.00098802	0.00209254	0.00043107	0.000148997	0.00399988	-0.00229713	0.000962329	0.0173989	-1.76452	0.302335	1.02632e-08	0.248755	0.00953801
SL004269	ghrelin	cg13347257	-0.00437141	0.0011237	0.000115087	0.000713112	7.5446e-05	1.75496e-19	-0.00570242	0.00122051	3.93105e-06	1.86648	0.692744	0.00731404	0.30448	0.00956675
SL004298	granzyme A	cg22021794	0.00349307	0.00064455	9.69641e-08	-0.000495946	8.44425e-05	8.23728e-09	0.00298595	0.000663134	8.52831e-06	-1.02253	0.354226	0.00407856	0.145179	0.00957946
SL003770	SARP-2	cg24882673	0.00545376	0.000824221	1.02695e-10	-0.0008771	8.81203e-05	2.9287e-21	0.00647501	0.00090292	3.01339e-12	1.16434	0.434128	0.00758277	0.187255	0.00960703
SL007328	JAG1	cg12645220	0.00361759	0.000478219	2.16359e-13	0.000904268	8.64095e-05	4.08937e-23	0.00299541	0.000529006	2.64917e-08	0.688053	0.257441	0.00779553	0.171989	0.00961032
SL004438	Cystatin M	cg14894216	-0.00311123	0.000973889	0.00149669	-0.0010371	0.000141559	1.07628e-12	-0.00402747	0.00102197	9.38825e-05	-0.883466	0.319156	0.00586687	0.294495	0.00961262
SL007310	RAC3	cg05369926	-0.00562849	0.00230917	0.0151709	-0.000385095	5.10759e-05	2.54934e-13	-0.0078537	0.00243087	0.00132345	-5.77833	2.09752	0.00610653	0.395347	0.00966673
SL000316	C4	cg18330047	0.00345375	0.000902977	0.000149105	0.000640399	0.000176432	0.000315934	0.00289486	0.000903535	0.00145111	0.872726	0.236681	0.000254017	0.161822	0.00968901
SL000316	C4	cg18330047	0.00345375	0.000902977	0.000149105	0.000640399	0.000176432	0.000315934	0.00289486	0.000903535	0.00145111	0.872726	0.236681	0.000254017	0.161822	0.00968901
SL004159	TRAIL R4	cg25475538	0.0020573	0.000842037	0.0149349	-0.000263315	4.91359e-05	1.33303e-07	0.00143773	0.000860927	0.0956134	-2.35299	0.796657	0.00330428	1	0.00968973
SL000507	Lymphotoxin a1/b2	cg13336485	-0.00313023	0.000605886	3.57809e-07	-0.000293431	5.19309e-05	2.82664e-08	-0.00266707	0.000621704	2.18538e-05	1.57844	0.542532	0.00379911	0.147965	0.00969159
SL000507	Lymphotoxin a1/b2	cg13336485	-0.00313023	0.000605886	3.57809e-07	-0.000293431	5.19309e-05	2.82664e-08	-0.00266707	0.000621704	2.18538e-05	1.57844	0.542532	0.00379911	0.147965	0.00969159
SL000316	C4	cg21610554	0.00345375	0.000902977	0.000149105	-0.000333115	6.82592e-05	1.46907e-06	0.0040781	0.000917972	1.11835e-05	1.87428	0.614588	0.00242511	0.180774	0.00970403
SL000316	C4	cg21610554	0.00345375	0.000902977	0.000149105	-0.000333115	6.82592e-05	1.46907e-06	0.0040781	0.000917972	1.11835e-05	1.87428	0.614588	0.00242511	0.180774	0.00970403
SL005797	PIGR	cg22945467	-0.00549963	0.000986487	4.25475e-08	0.000682992	8.49234e-05	7.72845e-15	-0.00449054	0.00104701	2.19591e-05	-1.47746	0.541344	0.00659523	0.183483	0.0097527
SL008644	BST1	cg16509355	-0.00305777	0.00098802	0.00209254	-0.000266021	7.54783e-05	0.000467961	-0.00244158	0.000986921	0.0137338	2.31631	0.609372	0.000163998	0.201516	0.0097531
SL005764	sCD163	cg27042065	0.00783328	0.000903022	7.28559e-17	-0.000334498	4.82017e-05	1.35e-11	0.00702396	0.00094239	4.59678e-13	-2.4195	0.869011	0.00558863	0.103318	0.00976648
SL000316	C4	cg00523604	0.00345375	0.000902977	0.000149105	-0.00109572	0.00012919	3.1417e-16	0.00442102	0.000965018	5.97887e-06	0.882765	0.325407	0.00692523	0.280062	0.00977044
SL000316	C4	cg00523604	0.00345375	0.000902977	0.000149105	-0.00109572	0.00012919	3.1417e-16	0.00442102	0.000965018	5.97887e-06	0.882765	0.325407	0.00692523	0.280062	0.00977044
SL001896	Clusterin	cg00815583	0.00200442	0.000688019	0.00375147	0.000189442	4.24525e-05	1.02157e-05	0.00155397	0.000696006	0.0260539	2.37776	0.750741	0.00164236	0.224728	0.00980015
SL005156	DAN	cg27549720	0.0103134	0.00102147	9.09315e-22	0.00181605	0.000174514	6.72708e-23	0.0116302	0.00112879	1.62647e-22	-0.725065	0.27229	0.00802308	0.127674	0.00988799
SL004143	GFRa-2	cg22321237	0.00453072	0.000615568	8.65596e-13	-0.000106236	2.56298e-05	4.05332e-05	0.00414099	0.000620406	7.24471e-11	-3.66857	1.11398	0.00106789	0.0860203	0.00992379
SL005200	MICB	cg26249135	0.00502956	0.00119425	3.05953e-05	-0.000669548	9.42027e-05	4.59612e-12	0.00393689	0.00124971	0.00173907	-1.63196	0.590034	0.00590853	0.217251	0.00994938
SL000507	Lymphotoxin a1/b2	cg04539172	-0.00313023	0.000605886	3.57809e-07	-0.000504975	6.20641e-05	3.92244e-15	-0.00250657	0.000643964	0.00011414	1.23504	0.454484	0.00683007	0.199239	0.00995178
SL000507	Lymphotoxin a1/b2	cg04539172	-0.00313023	0.000605886	3.57809e-07	-0.000504975	6.20641e-05	3.92244e-15	-0.00250657	0.000643964	0.00011414	1.23504	0.454484	0.00683007	0.199239	0.00995178
SL008609	FCG3B	cg07106927	0.00495986	0.000788631	7.45671e-10	0.000742085	6.87343e-05	2.31164e-24	0.00391078	0.000877532	1.04885e-05	1.4137	0.532624	0.00822658	0.211515	0.00995269
SL003190	MIP-5	cg14250838	0.00636376	0.000879492	1.97545e-12	-0.000312228	6.47525e-05	1.9412e-06	0.00696396	0.000893539	4.463e-14	1.9223	0.630341	0.00242502	0.0943149	0.00995468
SL000316	C4	cg23711760	0.00345375	0.000902977	0.000149105	-0.000428579	5.92712e-05	2.04662e-12	0.00429177	0.000946603	7.41882e-06	1.95533	0.709085	0.00605884	0.242638	0.00997969
SL000316	C4	cg23711760	0.00345375	0.000902977	0.000149105	-0.000428579	5.92712e-05	2.04662e-12	0.00429177	0.000946603	7.41882e-06	1.95533	0.709085	0.00605884	0.242638	0.00997969
SL000506	Luteinizing hormone	cg14792008	0.0142845	0.00181761	2.79114e-14	0.000333659	6.09152e-05	7.13012e-08	0.0156316	0.00186097	5.69316e-16	-4.03743	1.38294	0.0036797	0.0943069	0.00998499
SL000316	C4	cg19203836	0.00345375	0.000902977	0.000149105	-0.00089986	0.000112677	1.14941e-14	0.00436666	0.000957484	6.57186e-06	1.01449	0.373081	0.00679431	0.264321	0.0100501
SL000316	C4	cg19203836	0.00345375	0.000902977	0.000149105	-0.00089986	0.000112677	1.14941e-14	0.00436666	0.000957484	6.57186e-06	1.01449	0.373081	0.00679431	0.264321	0.0100501
SL012783	WFKN1	cg08110692	-0.00230958	0.000844852	0.00650562	-0.000699536	9.66461e-05	1.93868e-12	-0.00152791	0.000885617	0.0851606	1.11741	0.406009	0.00615592	1	0.0100968
SL000678	Granulysin	cg00670060	0.00543645	0.00107012	5.49814e-07	-0.00028999	4.95787e-05	9.41532e-09	0.00460541	0.00110074	3.43706e-05	-2.86577	1.00073	0.00438007	0.152865	0.0101121
SL003323	PARC	cg26039662	0.0148163	0.00109077	1.49279e-35	0.00110302	0.000222468	1.00425e-06	0.0140633	0.00110997	9.71052e-32	0.682681	0.227121	0.00279462	0.0508232	0.0101595
SL004712	SDF-1	cg03501777	0.00347207	0.000760694	6.44543e-06	-0.000417953	6.0417e-05	1.55143e-11	0.00414793	0.000793695	2.63774e-07	1.61708	0.584091	0.00585978	0.194657	0.0101599
SL010471	Testican-2	cg15331996	-0.0018078	0.000591953	0.00239149	0.000565907	9.27623e-05	2.26834e-09	-0.00133083	0.00061107	0.0299319	-0.842842	0.297526	0.00482002	0.26384	0.0101892
SL004298	granzyme A	cg25536739	0.00349307	0.00064455	9.69641e-08	0.000722694	8.58714e-05	5.04789e-16	0.00281317	0.000687991	5.12182e-05	0.940784	0.348728	0.00723973	0.194642	0.0101994
SL003182	Integrin aVb5	cg13308143	0.00343001	0.000804446	2.44607e-05	-0.000293724	5.31495e-05	5.51958e-08	0.00282984	0.000824363	0.000652344	-2.04332	0.704619	0.00391438	0.174977	0.0102335
SL005200	MICB	cg00807475	0.00502956	0.00119425	3.05953e-05	0.000451935	5.75923e-05	3.06908e-14	0.00384405	0.00126367	0.00248647	2.62318	0.965386	0.00683461	0.235708	0.0102388
SL001797	Kallikrein 6	cg21930712	0.003778	0.000568646	8.8062e-11	-0.000346731	6.13753e-05	2.85313e-08	0.00421006	0.000583679	2.3297e-12	1.24612	0.43231	0.00413431	0.114364	0.0102417
SL000316	C4	cg14110444	0.00345375	0.000902977	0.000149105	-0.000328616	7.44907e-05	1.28288e-05	0.0040375	0.000913135	1.22745e-05	1.77637	0.562772	0.00170327	0.169017	0.0102573
SL000316	C4	cg14110444	0.00345375	0.000902977	0.000149105	-0.000328616	7.44907e-05	1.28288e-05	0.0040375	0.000913135	1.22745e-05	1.77637	0.562772	0.00170327	0.169017	0.0102573
SL012783	WFKN1	cg01351992	-0.00230958	0.000844852	0.00650562	0.000444164	0.000119048	0.000214753	-0.00179447	0.00084702	0.0346672	-1.15973	0.327868	0.000445836	0.223032	0.01026
SL002517	TNF-a	cg00807475	0.00209346	0.00076135	0.00620318	0.000459607	5.7324e-05	9.18163e-15	0.00132344	0.000807747	0.102025	1.67539	0.618353	0.00699473	1	0.0102632
SL000316	C4	cg18576957	0.00345375	0.000902977	0.000149105	-0.00105526	0.000272642	0.0001245	0.0028985	0.000907063	0.00149333	-0.526182	0.153463	0.000661747	0.16077	0.0102727
SL000316	C4	cg18576957	0.00345375	0.000902977	0.000149105	-0.00105526	0.000272642	0.0001245	0.0028985	0.000907063	0.00149333	-0.526182	0.153463	0.000661747	0.16077	0.0102727
SL000420	Ferritin	cg08097359	0.00836845	0.00229777	0.00030145	0.00068214	0.000113444	3.72462e-09	0.0065505	0.00236859	0.00591239	2.66507	0.939241	0.00474944	0.217239	0.0102845
SL009045	ENPP7	cg25628325	0.00535713	0.00178297	0.00280503	-0.000232339	6.31894e-05	0.000264111	0.00427367	0.00178617	0.0171302	-4.66329	1.30175	0.0003771	0.202247	0.010292
SL000678	Granulysin	cg05560302	0.00543645	0.00107012	5.49814e-07	0.000314777	7.24515e-05	1.71935e-05	0.00475327	0.00108127	1.37269e-05	2.17037	0.683416	0.00159547	0.125667	0.0103516
SL003327	Factor D	cg24140597	0.00826188	0.00065121	8.62886e-32	-0.000106683	2.15853e-05	1.08674e-06	0.00781332	0.000662666	3.54672e-28	-4.20464	1.40209	0.00285899	0.054293	0.0103531
SL014009	HDGR2	cg07642566	0.00433966	0.000955934	7.21352e-06	0.000331067	4.40672e-05	3.07208e-13	0.0034305	0.0010062	0.000708961	2.74613	1.00768	0.00667338	0.209499	0.0104112
SL001728	PDGFRA	cg14039968	0.00291896	0.000797917	0.000283761	-0.000219374	4.52555e-05	1.72002e-06	0.00237609	0.000811099	0.00356676	-2.4746	0.820195	0.00269595	0.185978	0.0104232
SL003744	Galectin-3	cg27403778	0.00535172	0.000482172	1.65763e-25	0.000372697	6.22301e-05	4.27862e-09	0.00573145	0.000496932	3.51198e-27	-1.01887	0.359692	0.00482133	0.0709548	0.0104475
SL000251	a2-HS-Glycoprotein	cg25818109	-0.00197401	0.000394954	8.2825e-07	-0.00207282	0.000116665	5.30679e-54	-0.00282053	0.000511056	5.74694e-08	-0.408392	0.157897	0.0100082	0.428835	0.0104834
SL000414	Factor B	cg18244508	0.00161112	0.000502062	0.00142606	-0.000447355	7.96576e-05	3.40693e-08	0.00198817	0.000515075	0.000129853	0.84283	0.293146	0.00422858	0.234026	0.0104904
SL000414	Factor B	cg10093328	0.00161112	0.000502062	0.00142606	-0.000593235	9.10046e-05	1.88648e-10	0.00203473	0.000521141	0.000108811	0.714058	0.256742	0.00564083	0.262925	0.0105239
SL003310	VEGF	cg08855022	0.00424927	0.00160975	0.00858136	-0.000454791	7.09242e-05	3.57948e-10	0.00558615	0.00166828	0.000880017	2.93954	1.05392	0.00550601	0.314612	0.0105376
SL000316	C4	cg17478749	0.00345375	0.000902977	0.000149105	-0.000451136	0.000108396	3.77493e-05	0.00401854	0.000910557	1.27346e-05	1.25191	0.386521	0.00128783	0.163527	0.0105855
SL000316	C4	cg17478749	0.00345375	0.000902977	0.000149105	-0.000451136	0.000108396	3.77493e-05	0.00401854	0.000910557	1.27346e-05	1.25191	0.386521	0.00128783	0.163527	0.0105855
SL005261	TCPTP	cg26070636	0.00192575	0.000805728	0.0172536	-0.000289501	5.25875e-05	6.19509e-08	0.00132887	0.000825646	0.108209	-2.06176	0.714908	0.00411515	1	0.0106299
SL004355	LD78-beta	cg09730211	0.00688569	0.000751479	1.71511e-18	-0.000150353	2.70012e-05	4.39343e-08	0.00632737	0.000770454	2.25048e-15	-3.71341	1.29167	0.00423068	0.0810843	0.0106333
SL014008	FUT5	cg27299588	0.00729715	0.00101363	2.50156e-12	-0.000623751	8.17176e-05	1.34479e-13	0.00827023	0.00106879	6.53189e-14	1.56004	0.575628	0.00697835	0.13335	0.0106511
SL005200	MICB	cg27071793	0.00502956	0.00119425	3.05953e-05	0.00110183	0.000261257	2.98296e-05	0.00427947	0.00120512	0.000423733	0.680765	0.212144	0.00142642	0.149136	0.0106562
SL000248	a1-Antichymotrypsin	cg01163842	0.00132386	0.000356623	0.000230811	0.000201756	4.68442e-05	2.02735e-05	0.00154948	0.000360237	2.0788e-05	-1.11828	0.352642	0.00162076	0.170426	0.0106607
SL000509	Lymphotoxin b R	cg22402467	0.00263633	0.000807293	0.00117448	-0.00172632	0.000131527	1.30992e-33	0.00391972	0.00094165	3.76386e-05	0.743427	0.285628	0.0095489	0.486811	0.0106778
SL005200	MICB	cg16167809	0.00502956	0.00119425	3.05953e-05	-0.000561324	9.47256e-05	6.14243e-09	0.00596063	0.00123006	1.73368e-06	1.6587	0.586556	0.00489334	0.185119	0.0107061
SL009045	ENPP7	cg00917181	0.00535713	0.00178297	0.00280503	-0.000607407	7.23319e-05	5.75732e-16	0.00349583	0.00190254	0.0667919	-3.06434	1.14413	0.00766576	1	0.0107204
SL000414	Factor B	cg04841389	0.00161112	0.000502062	0.00142606	-0.00051903	9.71498e-05	1.45122e-07	0.00197336	0.000513393	0.000138439	0.697921	0.240321	0.00386246	0.224838	0.0107253
SL001729	G-CSF	cg07248223	0.0020619	0.000708174	0.00377332	-0.000749519	0.000141464	1.82673e-07	0.00155362	0.000723811	0.0323676	-0.67813	0.233035	0.00379245	0.246507	0.0107537
SL016928	SLAF7	cg10016364	0.00621455	0.00127983	1.6553e-06	-0.000717822	0.000147506	1.57294e-06	0.00534563	0.00130153	4.75643e-05	-1.21049	0.404563	0.00292261	0.13982	0.0108078
SL010288	Carbonic anhydrase 6	cg17953816	-0.00821013	0.00144937	2.60996e-08	0.000616416	8.84711e-05	1.13181e-11	-0.00692562	0.00151368	6.13642e-06	-2.08384	0.760945	0.00641396	0.156454	0.0108128
SL009045	ENPP7	cg03431918	0.00535713	0.00178297	0.00280503	-0.00148316	7.16939e-05	1.28096e-67	0.00975621	0.00246481	8.75459e-05	2.96601	1.15503	0.010548	0.821164	0.0108231
SL000316	C4	cg23471770	0.00345375	0.000902977	0.000149105	-0.000745534	0.000170649	1.54871e-05	0.00402829	0.000912898	1.27707e-05	0.770632	0.245691	0.00182034	0.16635	0.0108366
SL000316	C4	cg23471770	0.00345375	0.000902977	0.000149105	-0.000745534	0.000170649	1.54871e-05	0.00402829	0.000912898	1.27707e-05	0.770632	0.245691	0.00182034	0.16635	0.0108366
SL010454	Contactin-4	cg18657094	0.00190456	0.000476645	7.52053e-05	0.00107434	0.00010738	1.96587e-21	0.00131951	0.00052307	0.011989	0.544567	0.206752	0.00872888	0.307184	0.0108613
SL001766	HCG	cg10695490	0.0280648	0.00244188	4.90565e-27	-0.000720811	7.21256e-05	2.09676e-21	0.0310492	0.00267771	1.98228e-27	4.14029	1.57183	0.00872324	0.106338	0.0108629
SL004915	NCC27	cg27005847	-0.0071386	0.00266416	0.0076389	-0.000437488	5.63582e-05	5.47912e-14	-0.00972654	0.0028148	0.000600556	-5.91545	2.19391	0.00727014	0.362527	0.0108642
SL003332	MMP-17	cg25455773	0.00214594	0.000896659	0.0171028	-0.000545079	0.000126535	2.02132e-05	0.00158033	0.000905855	0.0817355	-1.03767	0.328628	0.00169653	1	0.0108747
SL000316	C4	cg12394289	0.00345375	0.000902977	0.000149105	-0.00112396	9.03564e-05	8.82816e-31	0.00481499	0.00103874	4.66249e-06	1.2111	0.465561	0.00958794	0.394133	0.0108871
SL000316	C4	cg12394289	0.00345375	0.000902977	0.000149105	-0.00112396	9.03564e-05	8.82816e-31	0.00481499	0.00103874	4.66249e-06	1.2111	0.465561	0.00958794	0.394133	0.0108871
SL010520	AURKB	cg26916916	0.00265883	0.000680681	0.000108051	-0.000412423	7.40697e-05	4.41628e-08	0.00316389	0.000698033	7.46597e-06	1.22463	0.42792	0.00440724	0.189958	0.0109182
SL000678	Granulysin	cg10337027	0.00543645	0.00107012	5.49814e-07	-0.000211902	4.06722e-05	2.86085e-07	0.00468305	0.00109246	2.21334e-05	-3.55543	1.21948	0.00372533	0.138583	0.0109512
SL003201	VEGF sR2	cg03441993	-0.00271309	0.00048045	2.86954e-08	0.000486558	9.11257e-05	1.47091e-07	-0.00305718	0.00049124	1.10158e-09	0.707184	0.244403	0.00399172	0.126824	0.0109598
SL000316	C4	cg13031097	0.00345375	0.000902977	0.000149105	-0.000846535	0.000152798	5.12036e-08	0.0041201	0.000925642	1.07647e-05	0.787145	0.274881	0.00438272	0.192934	0.0109631
SL000316	C4	cg13031097	0.00345375	0.000902977	0.000149105	-0.000846535	0.000152798	5.12036e-08	0.0041201	0.000925642	1.07647e-05	0.787145	0.274881	0.00438272	0.192934	0.0109631
SL014270	CLM6	cg17430268	0.00642427	0.000666351	3.80702e-20	-0.000430887	5.42811e-05	1.60351e-14	0.00576452	0.00070603	3.18201e-15	-1.53114	0.570384	0.00753048	0.102696	0.0109925
SL010450	CD48	cg04927360	0.00545014	0.000606665	6.90733e-18	0.000107455	2.67663e-05	6.95966e-05	0.00507974	0.000610758	1.04989e-15	3.44697	1.04905	0.00109538	0.0679606	0.0109997
SL003302	Ck-b-8-1	cg04636269	0.00488314	0.000761595	3.60686e-10	0.000509795	6.52833e-05	4.01101e-14	0.00413843	0.000805528	4.14113e-07	1.46079	0.543203	0.0074255	0.152506	0.0110008
SL004151	IL-15 Ra	cg27141509	0.00592776	0.000845948	8.75967e-12	-0.00047767	0.000118104	6.15449e-05	0.00541011	0.000851977	5.20973e-10	-1.0837	0.331566	0.00116327	0.0873262	0.0110185
SL008644	BST1	cg03290977	-0.00305777	0.00098802	0.00209254	0.000359335	6.72368e-05	1.44812e-07	-0.00377286	0.00101077	0.000213919	1.99004	0.688629	0.00404173	0.23386	0.0110214
SL000248	a1-Antichymotrypsin	cg18687675	0.00132386	0.000356623	0.000230811	0.000849582	0.000106719	1.36385e-14	0.00167766	0.000377995	1.13841e-05	-0.416439	0.155269	0.00758285	0.267248	0.0110321
SL000414	Factor B	cg01835021	0.00161112	0.000502062	0.00142606	-0.000711156	9.65317e-05	8.26869e-13	0.0020774	0.000527505	9.50066e-05	0.655667	0.242148	0.00703054	0.289414	0.0110382
SL000403	Endostatin	cg00376480	0.00493592	0.000654235	2.49119e-13	-0.000378849	7.13365e-05	1.7114e-07	0.00540355	0.000668808	5.93364e-15	1.23435	0.426505	0.00398546	0.094741	0.0110454
SL005789	Stanniocalcin-1	cg14538320	0.0071348	0.000690715	1.2619e-22	0.000331348	8.18983e-05	6.1183e-05	0.00671295	0.000695655	3.54301e-20	1.27311	0.389997	0.00117926	0.0591247	0.0110675
SL002602	Trefoil factor 2	cg10654510	0.00958421	0.00102396	3.59784e-19	-0.000255326	6.01156e-05	2.62222e-05	0.0102218	0.00103378	5.08057e-21	2.497	0.788171	0.00163729	0.0665208	0.0111029
SL004139	Ephrin-A3	cg06160440	-0.00165059	0.000598347	0.00603867	-7.55856e-05	1.839e-05	4.68941e-05	-0.00128286	0.000603141	0.0339605	4.8651	1.50819	0.00134678	0.222788	0.0111621
SL005172	IGFBP-6	cg23395715	0.00755524	0.000703482	3.82194e-24	0.000463651	9.15456e-05	5.94502e-07	0.00803934	0.000717036	6.20797e-26	-1.0441	0.356522	0.00357585	0.0640745	0.0112368
SL004209	annexin II	cg02454802	0.00520034	0.0010573	1.21771e-06	-0.000233103	6.21976e-05	0.000201207	0.00457056	0.0010609	2.01652e-05	-2.70171	0.785071	0.000631971	0.121103	0.0112502
SL000309	C1q	cg05266663	0.00273913	0.00108282	0.011757	-0.000127843	3.49921e-05	0.000289037	0.00209247	0.00108511	0.0544393	-5.05819	1.43753	0.000477718	1	0.0112641
SL000309	C1q	cg05266663	0.00273913	0.00108282	0.011757	-0.000127843	3.49921e-05	0.000289037	0.00209247	0.00108511	0.0544393	-5.05819	1.43753	0.000477718	1	0.0112641
SL000309	C1q	cg05266663	0.00273913	0.00108282	0.011757	-0.000127843	3.49921e-05	0.000289037	0.00209247	0.00108511	0.0544393	-5.05819	1.43753	0.000477718	1	0.0112641
SL000414	Factor B	cg20543183	0.00161112	0.000502062	0.00142606	-0.00110786	7.37974e-05	1.14693e-41	0.00251397	0.000610186	4.50307e-05	0.814953	0.316993	0.0104615	0.560387	0.0112771
SL005207	NKp46	cg04607867	0.00249152	0.000718363	0.000573988	-0.000123564	2.99731e-05	4.46159e-05	0.00293492	0.000724328	5.98355e-05	3.58849	1.11708	0.00141079	0.177967	0.0112794
SL003176	I-309	cg23052220	0.00313722	0.000691138	7.23726e-06	-0.000717805	0.000127042	2.83041e-08	0.00365206	0.000709513	3.9431e-07	0.717236	0.253095	0.00480392	0.164106	0.0113057
SL003301	Ck-b-8-1	cg24325790	0.00488257	0.000690764	5.89758e-12	0.000202035	3.67925e-05	6.63482e-08	0.00538523	0.000707673	1.58905e-13	-2.48798	0.871447	0.00449999	0.10295	0.0113065
SL004871	DR6	cg05947443	0.00493213	0.000544189	3.75474e-18	0.000676207	7.78023e-05	6.48958e-17	0.00551474	0.000583702	1.82713e-19	-0.861588	0.32541	0.00838553	0.118126	0.0113161
SL003327	Factor D	cg08902698	0.00826188	0.00065121	8.62886e-32	-0.000522431	9.53388e-05	7.06637e-08	0.00873592	0.000667129	1.83612e-33	0.907371	0.317729	0.00448968	0.0573766	0.0113248
SL002706	CD23	cg02961707	0.00419297	0.00104102	6.59734e-05	0.000738893	0.000124414	5.70047e-09	0.00338759	0.00107258	0.00169249	1.08998	0.389354	0.00533707	0.192078	0.0113337
SL001943	IL-6 sRa	cg27442164	0.00278235	0.000803878	0.000588258	-0.000449529	6.59164e-05	2.89387e-11	0.00208912	0.000837849	0.0130042	-1.54213	0.565899	0.0066749	0.249153	0.0113885
SL000316	C4	cg11823230	0.00345375	0.000902977	0.000149105	0.000464134	7.72299e-05	3.81185e-09	0.00274925	0.000931216	0.0033174	1.51789	0.544092	0.00549663	0.203982	0.0113927
SL000316	C4	cg11823230	0.00345375	0.000902977	0.000149105	0.000464134	7.72299e-05	3.81185e-09	0.00274925	0.000931216	0.0033174	1.51789	0.544092	0.00549663	0.203982	0.0113927
SL000414	Factor B	cg20759600	0.00161112	0.000502062	0.00142606	-0.000515727	7.06066e-05	1.25783e-12	0.00207146	0.000527063	9.81064e-05	0.892601	0.331082	0.00727827	0.285725	0.0114315
SL002706	CD23	cg24014869	0.00419297	0.00104102	6.59734e-05	0.00065623	0.000150648	1.63799e-05	0.00353877	0.00105254	0.000838917	0.996915	0.320921	0.00201236	0.156024	0.0114329
SL005200	MICB	cg15744333	0.00502956	0.00119425	3.05953e-05	-0.000595171	0.000127407	3.94407e-06	0.00424981	0.00121189	0.000498709	-1.31013	0.435605	0.00277936	0.155034	0.0114448
SL003643	Glutathione S-transferase Pi	cg04265051	0.00745587	0.0014225	2.43742e-07	0.00141851	0.000109228	4.70279e-33	0.00966773	0.00165376	9.59588e-09	-1.55929	0.604819	0.0102463	0.296661	0.0114466
SL010460	FCG2B	cg04384208	0.00516571	0.00181186	0.00455433	-0.000506078	0.000125469	6.43737e-05	0.00406897	0.00182487	0.0262506	-2.16713	0.667859	0.00126122	0.212311	0.011462
SL003785	GAPDH, liver	cg09692396	0.00744038	0.00266461	0.00545254	-0.000929139	0.00012042	7.58626e-14	0.00488719	0.00281365	0.0830688	-2.74792	1.02708	0.00773031	1	0.0114774
SL000316	C4	cg11431261	0.00345375	0.000902977	0.000149105	-0.000442894	8.11082e-05	7.8224e-08	0.00410704	0.000924894	1.12816e-05	1.47504	0.51789	0.00459678	0.189153	0.0115601
SL000316	C4	cg11431261	0.00345375	0.000902977	0.000149105	-0.000442894	8.11082e-05	7.8224e-08	0.00410704	0.000924894	1.12816e-05	1.47504	0.51789	0.00459678	0.189153	0.0115601
SL018891	DSCAM	cg22862003	0.002315	0.00080732	0.00433062	-0.00100004	0.000121114	1.66017e-15	0.00148893	0.000860346	0.0842033	-0.826033	0.311461	0.00828068	1	0.0115676
SL012783	WFKN1	cg03000848	-0.00230958	0.000844852	0.00650562	-0.00136268	0.000153275	1.41707e-17	-0.0013903	0.000909116	0.126887	0.674611	0.256183	0.00874271	1	0.0115734
SL002528	NPS-PLA2	cg24671886	0.0104639	0.00116217	5.88078e-18	-0.000381798	9.58211e-05	7.86613e-05	0.00976527	0.00116989	8.37965e-16	-1.82975	0.560855	0.00118736	0.0667626	0.011595
SL004351	IL-17E	cg14021286	0.00208913	0.000858421	0.0153278	0.000199035	4.70524e-05	2.8237e-05	0.00261829	0.000866672	0.00266035	-2.65859	0.845231	0.00176704	0.253288	0.0116003
SL000344	Cathepsin D	cg04069951	0.00726572	0.00112617	2.85095e-10	0.000510085	0.000120265	2.69642e-05	0.00656697	0.00113727	1.44004e-08	1.36987	0.436193	0.0017974	0.0961707	0.0116053
SL000038	MCP-1	cg08625239	0.0037942	0.00119806	0.0016443	0.000479587	7.79823e-05	1.70113e-09	0.00284469	0.00123793	0.0220205	1.97985	0.71581	0.00590882	0.250253	0.0116518
SL000316	C4	cg01018117	0.00345375	0.000902977	0.000149105	-0.000608257	0.000147344	4.35109e-05	0.00290248	0.000910619	0.00153488	-0.906327	0.284454	0.00154097	0.159617	0.0116594
SL000316	C4	cg01018117	0.00345375	0.000902977	0.000149105	-0.000608257	0.000147344	4.35109e-05	0.00290248	0.000910619	0.00153488	-0.906327	0.284454	0.00154097	0.159617	0.0116594
SL000507	Lymphotoxin a1/b2	cg08743794	-0.00313023	0.000605886	3.57809e-07	0.000264028	7.22984e-05	0.000290536	-0.00277284	0.000607298	6.41449e-06	-1.3536	0.388145	0.000535339	0.114173	0.0116656
SL000507	Lymphotoxin a1/b2	cg08743794	-0.00313023	0.000605886	3.57809e-07	0.000264028	7.22984e-05	0.000290536	-0.00277284	0.000607298	6.41449e-06	-1.3536	0.388145	0.000535339	0.114173	0.0116656
SL000316	C4	cg26183708	0.00345375	0.000902977	0.000149105	-0.000498927	6.35764e-05	3.05769e-14	0.00433263	0.000955771	7.44368e-06	1.76153	0.661434	0.0080154	0.254469	0.0116713
SL000440	Hemopexin	cg24678137	0.00569168	0.00179685	0.00163982	0.000524913	9.04691e-05	1.22322e-08	0.0070455	0.00184797	0.000156393	-2.57913	0.921214	0.00533153	0.237859	0.0116854
SL005200	MICB	cg18808777	0.00502956	0.00119425	3.05953e-05	-0.0015928	0.00020953	1.68436e-13	0.00389978	0.00125935	0.00207844	-0.709307	0.26542	0.00780226	0.224629	0.0116975
SL004805	Nectin-like protein 2	cg12026858	0.0030779	0.00048895	7.2337e-10	0.000182355	3.48323e-05	2.51995e-07	0.00273591	0.000499464	7.14352e-08	1.87541	0.652177	0.00422159	0.111112	0.0117213
SL005200	MICB	cg13060500	0.00502956	0.00119425	3.05953e-05	-0.000374428	6.81747e-05	6.6144e-08	0.00416409	0.00122377	0.00072638	-2.31145	0.814951	0.00476787	0.172077	0.0117322
SL005172	IGFBP-6	cg08033722	0.00755524	0.000703482	3.82194e-24	0.000405701	9.68145e-05	3.34223e-05	0.00712448	0.000709953	1.51675e-21	1.06177	0.336623	0.00171584	0.0570149	0.0117329
SL004298	granzyme A	cg04705866	0.00349307	0.00064455	9.69641e-08	-0.000300723	6.87358e-05	1.50545e-05	0.00309015	0.000651873	2.85525e-06	-1.33984	0.434622	0.00217523	0.115348	0.0117351
SL005200	MICB	cg19573580	0.00502956	0.00119425	3.05953e-05	0.000619346	5.81663e-05	8.64706e-24	0.0034931	0.00132646	0.00874169	2.48077	0.956541	0.00980775	0.305485	0.0117416
SL000316	C4	cg14562426	0.00345375	0.000902977	0.000149105	-0.000544039	0.000122571	1.13767e-05	0.00402348	0.000913957	1.3371e-05	1.04721	0.342238	0.00234538	0.164957	0.0117605
SL000316	C4	cg14562426	0.00345375	0.000902977	0.000149105	-0.000544039	0.000122571	1.13767e-05	0.00402348	0.000913957	1.3371e-05	1.04721	0.342238	0.00234538	0.164957	0.0117605
SL000507	Lymphotoxin a1/b2	cg10734448	-0.00313023	0.000605886	3.57809e-07	-0.000312437	6.46923e-05	1.87224e-06	-0.00272857	0.000616019	1.18577e-05	1.28558	0.435391	0.00331338	0.128318	0.0117625
SL000507	Lymphotoxin a1/b2	cg10734448	-0.00313023	0.000605886	3.57809e-07	-0.000312437	6.46923e-05	1.87224e-06	-0.00272857	0.000616019	1.18577e-05	1.28558	0.435391	0.00331338	0.128318	0.0117625
SL005218	Siglec-7	cg06708133	0.00454039	0.000583299	4.75721e-14	-0.00100546	0.000186459	1.11805e-07	0.00495672	0.000596971	1.1687e-15	0.414076	0.145367	0.00459172	0.0916967	0.0117794
SL004126	4-1BB	cg18795022	0.00341222	0.000769818	1.16934e-05	-0.000391033	6.06966e-05	3.00324e-10	0.00404455	0.000798553	5.95959e-07	1.61709	0.591038	0.006463	0.185316	0.0117914
SL008644	BST1	cg24225360	-0.00305777	0.00098802	0.00209254	0.000235301	6.01649e-05	0.000106189	-0.00365198	0.000993904	0.000267343	2.52534	0.767489	0.00107965	0.19433	0.0118084
SL000316	C4	cg26408612	0.00345375	0.000902977	0.000149105	-0.000516337	8.77077e-05	7.64249e-09	0.00414267	0.000929858	1.057e-05	1.33424	0.479108	0.00557941	0.199468	0.0118231
SL000316	C4	cg26408612	0.00345375	0.000902977	0.000149105	-0.000516337	8.77077e-05	7.64249e-09	0.00414267	0.000929858	1.057e-05	1.33424	0.479108	0.00557941	0.199468	0.0118231
SL000414	Factor B	cg10750010	0.00161112	0.000502062	0.00142606	-0.000436888	6.97837e-05	8.87783e-10	0.00201322	0.000519512	0.000122225	0.920369	0.334883	0.00622856	0.249576	0.0118517
SL015728	GCKR	cg05350188	0.00271435	0.00101874	0.00798639	-0.000161587	4.48546e-05	0.000349951	0.00331094	0.00102055	0.00126445	3.69208	1.05175	0.000492122	0.219792	0.0119321
SL004915	NCC27	cg06879746	-0.0071386	0.00266416	0.0076389	-0.00122215	0.000122846	3.04733e-21	-0.00394074	0.00291968	0.177776	2.61659	1.00706	0.00967306	1	0.0119399
SL015728	GCKR	cg08791692	0.00271435	0.00101874	0.00798639	-0.000104488	3.16561e-05	0.00104026	0.00331578	0.00101536	0.00117495	5.756	1.486	0.00012307	0.221575	0.0119948
SL004673	Cathepsin S	cg21859421	0.00274061	0.000612339	9.64938e-06	-0.000715192	0.00025016	0.00444675	0.00316048	0.00060047	2.19035e-07	0.587062	0.111774	2.31861e-07	0.1532	0.0120377
SL000062	PSA	cg19564512	0.0052903	0.00161788	0.00115699	-0.000380772	9.49838e-05	7.12324e-05	0.00625667	0.00162943	0.000140503	2.53793	0.787886	0.00136773	0.182669	0.012039
SL002706	CD23	cg08356214	0.00419297	0.00104102	6.59734e-05	-0.000669653	6.17644e-05	1.614e-24	0.00555029	0.00116057	2.34528e-06	2.0269	0.785286	0.0101613	0.323713	0.0120414
SL004458	Elafin	cg21511991	0.00733098	0.00106285	1.76613e-11	-0.000140983	2.79702e-05	6.69957e-07	0.00804983	0.00108324	5.33579e-13	5.09883	1.76145	0.00397724	0.098056	0.0120669
SL003188	MIG	cg17559786	0.00848118	0.00113406	3.94059e-13	0.00039336	6.87779e-05	1.9477e-08	0.00763544	0.00116564	1.56773e-10	2.15004	0.769797	0.00544438	0.0997195	0.0120827
SL005207	NKp46	cg20038038	0.00249152	0.000718363	0.000573988	-0.000444779	7.49558e-05	5.90196e-09	0.00304337	0.000740423	4.69654e-05	1.24073	0.447984	0.00584485	0.221492	0.0120841
SL004126	4-1BB	cg01535838	0.00341222	0.000769818	1.16934e-05	-0.000296713	4.75616e-05	1.01314e-09	0.00402567	0.000796442	6.27166e-07	2.06751	0.754241	0.00636417	0.179782	0.012087
SL005200	MICB	cg01830271	0.00502956	0.00119425	3.05953e-05	0.000482806	0.000152104	0.0016045	0.00431496	0.00118706	0.000309792	1.48011	0.361885	5.10372e-05	0.142081	0.0121553
SL006675	CKAP2	cg09258993	0.00284275	0.000713974	7.96477e-05	-0.000386534	7.32191e-05	2.01215e-07	0.00334178	0.000729794	6.03602e-06	1.29106	0.453119	0.00458072	0.175548	0.0121629
SL010470	Semaphorin 3E	cg26544028	0.0080889	0.00113961	4.87857e-12	-0.000512087	0.000101676	6.84408e-07	0.00731828	0.00116155	7.01309e-10	-1.50485	0.520693	0.00403543	0.0952681	0.0121864
SL005059	TGF-b R III	cg00519208	0.00361501	0.000506627	3.80863e-12	0.000232611	6.62093e-05	0.000486682	0.00332098	0.000506924	1.54367e-10	1.26405	0.35341	0.000385116	0.0813365	0.012197
SL005215	Siglec-3	cg01718065	0.00357818	0.00103526	0.000598896	0.000570993	0.000165236	0.000600377	0.00297646	0.00103492	0.0042163	1.05382	0.28954	0.000304348	0.168164	0.0122097
SL014292	SIG14	cg27040525	0.0048865	0.0012065	6.03601e-05	-0.000362753	6.31373e-05	1.69984e-08	0.00397951	0.00124099	0.00143938	-2.5003	0.898071	0.0055968	0.185611	0.0122304
SL012698	KI2L4	cg18221897	0.00385599	0.00150065	0.0104987	-0.000301736	6.39386e-05	3.15113e-06	0.00482592	0.00152389	0.00164414	3.21451	1.08754	0.00328037	0.25154	0.012246
SL005213	RELT	cg14864148	0.0071169	0.000635777	7.27348e-26	-0.000275552	9.8714e-05	0.00546808	0.0066605	0.000620301	3.99239e-24	-1.65634	0.291785	2.45108e-08	0.0641301	0.0122472
SL004859	GITR	cg20594982	0.00272492	0.00112582	0.015897	0.00126477	0.000218406	1.31205e-08	0.00187923	0.00115826	0.105402	0.668648	0.240674	0.0056936	1	0.0122494
SL003177	sICAM-2	cg17840858	0.0018218	0.000677025	0.00738736	0.000365352	7.85247e-05	4.29721e-06	0.00138753	0.000687011	0.0440035	1.18865	0.399898	0.00311129	0.238377	0.0122499
SL005200	MICB	cg07845011	0.00502956	0.00119425	3.05953e-05	0.000121187	3.44823e-05	0.000484771	0.00433638	0.00119505	0.000317304	5.71993	1.60312	0.000397997	0.137821	0.0122865
SL005183	IL-22BP	cg12050508	-0.00446704	0.000838101	1.54639e-07	0.000330102	5.38427e-05	1.89159e-09	-0.00381292	0.00086574	1.32424e-05	-1.98159	0.723002	0.00636995	0.146434	0.0123446
SL012517	RSPO4	cg10107382	0.0117264	0.00104032	3.59227e-26	-0.000530355	0.000103902	4.87769e-07	0.011019	0.00106119	8.15714e-23	-1.33391	0.464698	0.00428917	0.0603291	0.0123496
SL004298	granzyme A	cg27067419	0.00349307	0.00064455	9.69641e-08	-8.8136e-05	2.36056e-05	0.000212515	0.00311818	0.000647028	1.96575e-06	-4.25354	1.26306	0.000822382	0.107324	0.0123945
SL005171	IGFBP-4	cg20936107	0.00333642	0.000643607	3.26812e-07	-0.00054852	0.000118461	4.76423e-06	0.00292575	0.000652964	9.418e-06	-0.748699	0.251999	0.00312473	0.123089	0.0123998
SL014983	H2B2E	cg04776597	0.00458629	0.00119316	0.000138323	0.000612833	0.000104197	7.87391e-09	0.00368539	0.00122869	0.00285313	1.47007	0.532385	0.00599026	0.196434	0.0124362
SL010617	TPSB2	cg03856470	0.00540033	0.00163415	0.00102565	-0.000365022	0.000129569	0.00505429	0.00653067	0.00159957	5.25562e-05	3.09663	0.572541	1.0273e-07	0.209309	0.0124694
SL005200	MICB	cg20961940	0.00502956	0.00119425	3.05953e-05	-0.000668171	7.60005e-05	3.05129e-17	0.00375501	0.00128357	0.00361212	-1.90753	0.732029	0.00946694	0.253413	0.0124764
SL016928	SLAF7	cg00160981	0.00621455	0.00127983	1.6553e-06	-0.000862417	0.000102249	4.5197e-16	0.00489532	0.00136806	0.000383329	-1.52968	0.584975	0.00922281	0.21228	0.0125012
SL003326	I-TAC	cg14095959	0.00802603	0.00176915	7.31024e-06	0.000647136	0.00014765	1.45365e-05	0.00911706	0.00178986	5.14502e-07	-1.68593	0.554921	0.0025168	0.135936	0.0125279
SL000316	C4	cg16463880	0.00345375	0.000902977	0.000149105	-0.000581431	0.000109925	1.91099e-07	0.00408307	0.000923228	1.22188e-05	1.08235	0.382164	0.00482888	0.182212	0.0125326
SL000316	C4	cg16463880	0.00345375	0.000902977	0.000149105	-0.000581431	0.000109925	1.91099e-07	0.00408307	0.000923228	1.22188e-05	1.08235	0.382164	0.00482888	0.182212	0.0125326
SL000498	Leptin	cg16983084	0.00464792	0.0017562	0.00841113	0.000691419	0.000122885	3.20581e-08	0.00337178	0.00180264	0.0620586	1.84568	0.662926	0.00558958	1	0.0125828
SL004673	Cathepsin S	cg08623888	0.00274061	0.000612339	9.64938e-06	0.000255641	5.30544e-05	1.97689e-06	0.00233975	0.000622701	0.000194156	1.56809	0.537843	0.00372761	0.146269	0.0126159
SL014248	SEM6B	cg25471478	0.00345497	0.000619906	4.27699e-08	-0.000104179	2.63803e-05	9.081e-05	0.00309045	0.000624051	1.03505e-06	-3.49896	1.08817	0.00139489	0.105506	0.0126503
SL010450	CD48	cg07369190	0.00545014	0.000606665	6.90733e-18	0.000903169	0.000117583	9.68332e-14	0.00487921	0.000640482	1.50135e-13	0.632137	0.239794	0.00867085	0.104755	0.0126524
SL011809	XTP3A	cg27151362	0.0047245	0.000700749	4.75873e-11	0.00119626	9.74748e-05	4.24689e-30	0.00574601	0.000803836	3.54299e-12	-0.853917	0.335379	0.0112226	0.216215	0.0126655
SL005200	MICB	cg02346730	0.00502956	0.00119425	3.05953e-05	-0.000330105	8.66001e-05	0.000156926	0.00433382	0.00120024	0.000339279	-2.10763	0.639613	0.00106069	0.13833	0.0126724
SL000316	C4	cg13205613	0.00345375	0.000902977	0.000149105	-0.000281635	7.07449e-05	7.98627e-05	0.00398632	0.000909431	1.45371e-05	1.89098	0.592426	0.00151143	0.154199	0.0127637
SL000316	C4	cg13205613	0.00345375	0.000902977	0.000149105	-0.000281635	7.07449e-05	7.98627e-05	0.00398632	0.000909431	1.45371e-05	1.89098	0.592426	0.00151143	0.154199	0.0127637
SL004159	TRAIL R4	cg25764534	0.0020573	0.000842037	0.0149349	-0.000958254	0.000133908	3.34649e-12	0.00131257	0.000882319	0.137541	-0.777177	0.292856	0.0082388	1	0.0128392
SL000428	FSH	cg17685019	0.0363179	0.00193302	8.39055e-59	-0.000539903	9.80931e-05	6.19227e-08	0.0376945	0.00198132	7.23499e-60	2.54966	0.91406	0.00550163	0.0379033	0.0128429
SL000124	MMP-2	cg08454455	0.00214646	0.000575281	0.000214555	0.000535077	6.90619e-05	6.07562e-14	0.0016029	0.000607918	0.00865671	1.01585	0.38675	0.00891309	0.253235	0.012862
SL004438	Cystatin M	cg12562828	-0.00311123	0.000973889	0.00149669	-0.000416015	6.4882e-05	3.58297e-10	-0.00232917	0.00100976	0.0215203	1.87988	0.696618	0.00722153	0.251367	0.0128729
SL006610	ATS13	cg00115654	-0.00586105	0.000742322	2.16548e-14	0.00052096	0.000110152	3.00395e-06	-0.00633735	0.000754068	5.53529e-16	0.914263	0.312669	0.00362706	0.0812644	0.0128789
SL005195	LAG-3	cg15784615	0.00746282	0.00113219	1.20059e-10	-0.000271413	5.54302e-05	1.3549e-06	0.00820474	0.00115225	4.19638e-12	2.73356	0.946866	0.00407429	0.0994159	0.0128868
SL001947	MIA	cg23959976	0.00234237	0.000730485	0.00143741	-0.000473092	8.83983e-05	1.38047e-07	0.0018329	0.000747425	0.0145686	-1.07688	0.383676	0.00521907	0.217499	0.0129318
SL003785	GAPDH, liver	cg18464726	0.00744038	0.00266461	0.00545254	-0.000734219	8.74407e-05	5.78853e-16	0.00473716	0.00284451	0.0965239	-3.68176	1.41504	0.00957252	1	0.0129444
SL000458	IFN-g R1	cg04124126	0.00197595	0.000646972	0.00239028	0.0003392	5.05722e-05	5.94138e-11	0.00143374	0.000673834	0.0339015	1.59852	0.59768	0.00775492	0.274409	0.0129799
SL007674	LY9	cg10701110	0.00223361	0.000754654	0.00323832	-0.000495139	6.73785e-05	9.2676e-13	0.00155419	0.000792761	0.0505466	-1.37217	0.519977	0.00860167	1	0.0130055
SL009045	ENPP7	cg22972965	0.00535713	0.00178297	0.00280503	0.00043381	6.02785e-05	2.53958e-12	0.00378108	0.00186888	0.0436363	3.63304	1.37316	0.00843226	0.294196	0.013019
SL004354	IL-19	cg00761787	-0.001586	0.000544301	0.00374577	0.000330484	6.64217e-05	9.23636e-07	-0.00194655	0.000554514	0.000492065	1.09098	0.38075	0.00435845	0.227334	0.0130268
SL000420	Ferritin	cg15538427	0.00836845	0.00229777	0.00030145	-0.000875753	7.14386e-05	4.47487e-30	0.00505321	0.00263252	0.0555388	-3.78558	1.49413	0.0116214	1	0.0130939
SL011448	TNR4	cg13552506	0.00234817	0.000846543	0.00576874	-0.000284767	7.96973e-05	0.000390599	0.00283186	0.00084828	0.000912442	1.69855	0.493186	0.000626541	0.205986	0.0131504
SL001729	G-CSF	cg19572487	0.0020619	0.000708174	0.00377332	-0.000689268	0.00012247	3.19482e-08	0.00154916	0.000727177	0.0336784	-0.743878	0.269425	0.0059968	0.24867	0.0131835
SL001998	TFPI	cg04322162	0.00657538	0.000718667	1.91865e-18	-0.000362673	6.45166e-05	3.3045e-08	0.00709403	0.000737811	4.77552e-20	1.43009	0.517895	0.00598925	0.0788782	0.013195
SL005213	RELT	cg26758986	0.0071169	0.000635777	7.27348e-26	0.000864585	0.000154161	3.54636e-08	0.00757491	0.000652609	1.84053e-27	-0.529745	0.19174	0.00596253	0.0643551	0.0131969
SL008486	LEG9	cg13895343	0.00615166	0.000787298	3.9279e-14	0.00084069	0.000121413	1.51199e-11	0.00682693	0.000822534	1.22075e-15	-0.803223	0.30299	0.008308	0.109769	0.0132958
SL004139	Ephrin-A3	cg07556773	-0.00165059	0.000598347	0.00603867	-0.000194719	3.75767e-05	3.30493e-07	-0.00124448	0.000611078	0.0422758	2.08563	0.740066	0.00504035	0.24604	0.0132966
SL005195	LAG-3	cg07778290	0.00746282	0.00113219	1.20059e-10	-0.000302975	6.67131e-05	7.15214e-06	0.00675958	0.00114777	7.52453e-09	-2.32112	0.786408	0.0033245	0.0942329	0.0133307
SL002093	Histone H2A.z	cg27062369	0.0030263	0.00108793	0.00563278	0.000148518	3.96367e-05	0.000202044	0.00240293	0.00109284	0.0283974	4.19725	1.27444	0.00106734	0.205983	0.0133723
SL000507	Lymphotoxin a1/b2	cg21386904	-0.00313023	0.000605886	3.57809e-07	-0.000416769	6.10692e-05	2.8267e-11	-0.00261917	0.000631957	4.06305e-05	1.22624	0.46206	0.0082368	0.163266	0.0133823
SL000507	Lymphotoxin a1/b2	cg21386904	-0.00313023	0.000605886	3.57809e-07	-0.000416769	6.10692e-05	2.8267e-11	-0.00261917	0.000631957	4.06305e-05	1.22624	0.46206	0.0082368	0.163266	0.0133823
SL001729	G-CSF	cg02795515	0.0020619	0.000708174	0.00377332	0.000387898	6.21333e-05	9.8659e-10	0.00261677	0.000732919	0.000394625	-1.43047	0.531275	0.00735396	0.269111	0.0134213
SL000316	C4	cg18067840	0.00345375	0.000902977	0.000149105	-0.000807918	0.000132658	2.40074e-09	0.00414619	0.000932612	1.10219e-05	0.857061	0.316917	0.00710061	0.200488	0.0134493
SL000316	C4	cg18067840	0.00345375	0.000902977	0.000149105	-0.000807918	0.000132658	2.40074e-09	0.00414619	0.000932612	1.10219e-05	0.857061	0.316917	0.00710061	0.200488	0.0134493
SL003328	Factor I	cg03148184	0.00288155	0.000441516	1.79569e-10	0.000510923	9.79467e-05	2.77476e-07	0.00258126	0.000451113	1.9117e-08	0.587734	0.209521	0.00524507	0.10421	0.0134901
SL000546	PRL	cg26230039	-0.00555023	0.00122396	7.38133e-06	-0.000428975	7.82145e-05	6.87185e-08	-0.0064128	0.0012545	4.70332e-07	-2.01079	0.726747	0.00589054	0.155413	0.0135003
SL000062	PSA	cg18781966	0.0052903	0.00161788	0.00115699	-0.000514379	0.000142578	0.00034292	0.00620429	0.00162224	0.000149214	1.7769	0.524258	0.000761281	0.172769	0.0135029
SL007173	GRN	cg17123029	0.00157572	0.000535651	0.00343083	0.00072525	0.000131906	6.40598e-08	0.00119689	0.000549168	0.0298104	0.522343	0.189002	0.0059475	0.240416	0.0135379
SL000316	C4	cg10715333	0.00345375	0.000902977	0.000149105	-0.000219109	5.20008e-05	3.03219e-05	0.00399242	0.000912157	1.4953e-05	2.45845	0.806756	0.00244357	0.155966	0.0135402
SL000316	C4	cg10715333	0.00345375	0.000902977	0.000149105	-0.000219109	5.20008e-05	3.03219e-05	0.00399242	0.000912157	1.4953e-05	2.45845	0.806756	0.00244357	0.155966	0.0135402
SL000414	Factor B	cg18340416	0.00161112	0.000502062	0.00142606	-0.000619362	8.95482e-05	1.57598e-11	0.00203864	0.000524357	0.000116211	0.690259	0.26113	0.00849274	0.265356	0.0135424
SL010519	ZAP70	cg04722249	0.00425238	0.000835343	5.23873e-07	-0.000290473	4.76218e-05	2.27836e-09	0.00489361	0.000862939	2.53486e-08	2.20754	0.817605	0.00719338	0.150793	0.0135516
SL005201	MIS	cg21725716	0.00194449	0.000336711	1.42943e-08	0.00132588	0.000117115	2.4202e-26	0.00149457	0.000379041	9.31913e-05	0.339335	0.134138	0.0117521	0.231381	0.013554
SL003300	HCC-4	cg19014749	0.00776231	0.000935563	1.21686e-15	-0.000584807	9.39704e-05	1.10402e-09	0.00849024	0.000967899	3.54836e-17	1.24474	0.463079	0.00745262	0.0937776	0.0136013
SL016928	SLAF7	cg10106388	0.00621455	0.00127983	1.6553e-06	-0.000566029	6.18904e-05	2.03105e-18	0.00481252	0.00138473	0.000559392	-2.47695	0.966727	0.0107249	0.225604	0.0136171
SL003785	GAPDH, liver	cg07526656	0.00744038	0.00266461	0.00545254	-0.000348408	7.34159e-05	2.78197e-06	0.00574746	0.00270773	0.0343232	-4.85902	1.68251	0.00406162	0.227531	0.0136231
SL003340	YKL-40	cg14084623	0.0292871	0.0025326	2.59076e-27	-0.000366244	6.20924e-05	7.13997e-09	0.0274056	0.00260896	2.88834e-23	-5.13738	1.89277	0.0068946	0.0642444	0.0136752
SL000283	b2-Microglobulin	cg05439368	0.0108023	0.000662523	1.93329e-47	-0.00116265	0.000104467	1.27069e-25	0.00993533	0.000742561	1.1307e-34	-0.74568	0.294929	0.0117969	0.0802572	0.0136817
SL000316	C4	cg05423418	0.00345375	0.000902977	0.000149105	-0.000684412	7.82274e-05	4.21933e-17	0.00439953	0.000970027	7.36482e-06	1.38189	0.537842	0.0105082	0.273841	0.0136932
SL000316	C4	cg05423418	0.00345375	0.000902977	0.000149105	-0.000684412	7.82274e-05	4.21933e-17	0.00439953	0.000970027	7.36482e-06	1.38189	0.537842	0.0105082	0.273841	0.0136932
SL000344	Cathepsin D	cg11585942	0.00726572	0.00112617	2.85095e-10	-0.000226793	4.51826e-05	7.46613e-07	0.00801193	0.00114828	1.07874e-11	3.2903	1.1634	0.00488978	0.102704	0.0137403
SL003182	Integrin aVb5	cg04144365	0.00343001	0.000804446	2.44607e-05	-0.000408422	7.18069e-05	2.30848e-08	0.00284718	0.000826742	0.000626811	-1.42704	0.52207	0.00651338	0.169922	0.0137516
SL004639	TrkC	cg25936177	0.00258377	0.000560973	5.32999e-06	0.000881297	8.6959e-05	6.49743e-22	0.0019132	0.000617037	0.00205056	0.760897	0.299659	0.0114407	0.259534	0.0137749
SL000592	TIMP-2	cg25189267	0.00280883	0.000528114	1.6401e-07	-0.000244833	4.41336e-05	4.9129e-08	0.0024348	0.000541735	8.85435e-06	-1.52767	0.555787	0.00622132	0.13316	0.013781
SL003179	Integrin a1b1	cg09821400	0.00443193	0.00106412	3.72379e-05	-0.000581207	0.000118637	1.33837e-06	0.00512038	0.00108327	3.04209e-06	1.18453	0.415902	0.00459642	0.15534	0.0138072
SL008835	ASGR1	cg09737314	0.00378884	0.000825355	5.72401e-06	0.00114254	0.000258081	1.19674e-05	0.00328617	0.000835807	9.74716e-05	0.439959	0.148501	0.00320965	0.132672	0.0138093
SL008380	CATZ	cg13756273	0.0065145	0.000725539	7.12947e-18	-0.000625049	8.34951e-05	3.6711e-13	0.00717169	0.000763834	2.87529e-19	1.05143	0.403496	0.00946535	0.100882	0.0138564
SL005215	Siglec-3	cg14884932	0.00357818	0.00103526	0.000598896	0.000582556	0.000179252	0.00123974	0.00299302	0.00103235	0.00392184	1.00447	0.266631	0.00018673	0.163535	0.0138632
SL010471	Testican-2	cg15323528	-0.0018078	0.000591953	0.00239149	0.000206123	4.70652e-05	1.47883e-05	-0.0014486	0.000599188	0.0160175	-1.74266	0.585881	0.00309254	0.198695	0.0138711
SL000164	Myoglobin	cg18448426	0.00514237	0.000779032	1.13508e-10	-0.00122941	8.86755e-05	9.86177e-37	0.00388645	0.000923231	3.08259e-05	-1.02156	0.408614	0.0127671	0.24423	0.0138787
SL005200	MICB	cg26749976	0.00502956	0.00119425	3.05953e-05	-0.000586869	0.000159762	0.00026781	0.00570342	0.00119877	2.63498e-06	1.14822	0.346666	0.000999646	0.133979	0.013898
SL000451	HSP 70	cg03900314	0.00621418	0.000753224	1.69622e-15	0.000550134	0.000105959	3.13524e-07	0.00672065	0.000769386	4.63437e-17	-0.920634	0.329728	0.00545625	0.0815027	0.0139297
SL004016	CXCL16, soluble	cg11011533	0.00374449	0.00051959	2.40083e-12	0.00139139	9.68367e-05	7.20556e-39	0.00287625	0.00062291	5.06534e-06	0.624007	0.250113	0.0129535	0.231871	0.0139667
SL000459	IgA	cg15352829	0.00733032	0.00114964	4.44032e-10	0.000859783	0.000105619	3.75789e-15	0.00621006	0.0012225	5.51429e-07	1.30297	0.505508	0.010263	0.152827	0.0139986
SL000459	IgA	cg15352829	0.00733032	0.00114964	4.44032e-10	0.000859783	0.000105619	3.75789e-15	0.00621006	0.0012225	5.51429e-07	1.30297	0.505508	0.010263	0.152827	0.0139986
SL004125	IR	cg22780731	0.00255927	0.000631861	6.00753e-05	-0.000222454	5.54266e-05	6.99074e-05	0.00292447	0.000636896	5.69287e-06	1.6417	0.528287	0.002004	0.142698	0.014005
SL005158	DC-SIGNR	cg08036804	0.00235007	0.000395417	5.5487e-09	-0.000716678	0.000184396	0.000116692	0.00257566	0.000397981	2.50413e-10	0.314779	0.0993327	0.00163285	0.0959953	0.0140479
SL009210	b-Endorphin	cg23281712	0.0037537	0.00124324	0.00267627	-0.000135209	3.52055e-05	0.000140159	0.00304577	0.00125065	0.0152613	-5.23579	1.63905	0.00149874	0.188594	0.0140525
SL000062	PSA	cg10218347	0.0052903	0.00161788	0.00115699	-0.00015784	4.02709e-05	0.000102309	0.00621495	0.00162899	0.000154768	5.8582	1.85922	0.00173459	0.174784	0.0140594
SL008835	ASGR1	cg15468668	0.00378884	0.000825355	5.72401e-06	-0.000443356	6.58173e-05	4.91529e-11	0.00310669	0.00085985	0.000336333	-1.5386	0.583446	0.00864823	0.180041	0.0140641
SL003643	Glutathione S-transferase Pi	cg00462202	0.00745587	0.0014225	2.43742e-07	-0.000169399	3.25555e-05	2.9582e-07	0.00841216	0.00145326	1.32113e-08	5.64519	2.02681	0.00557083	0.12826	0.0140651
SL009948	PLXB2	cg08144042	0.00426742	0.000568541	3.20803e-13	-0.000782744	8.24361e-05	1.22267e-19	0.00363	0.000618312	8.3472e-09	-0.814347	0.320359	0.0113518	0.14937	0.0140686
SL005200	MICB	cg11943056	0.00502956	0.00119425	3.05953e-05	-0.00013029	3.89729e-05	0.000896953	0.00569714	0.00119312	2.42885e-06	5.12378	1.41791	0.000335704	0.132731	0.014128
SL007310	RAC3	cg10047762	-0.00562849	0.00230917	0.0151709	-0.00038766	0.000116695	0.000965316	-0.00434077	0.00230619	0.0604401	3.32178	0.912516	0.000303513	1	0.0141349
SL010520	AURKB	cg25588826	0.00265883	0.000680681	0.000108051	-0.000659202	8.24216e-05	1.06161e-14	0.00331324	0.000722578	5.87331e-06	0.992734	0.385206	0.0102771	0.246128	0.014169
SL004915	NCC27	cg03422527	-0.0071386	0.00266416	0.0076389	-0.000355211	6.87625e-05	3.57978e-07	-0.00891777	0.00272065	0.00112593	-5.00875	1.79718	0.00554126	0.249232	0.0141748
SL004354	IL-19	cg01965508	-0.001586	0.000544301	0.00374577	-0.000274041	4.81572e-05	2.26827e-08	-0.00197752	0.000559392	0.000449305	-1.4287	0.525623	0.00681628	0.246862	0.0141796
SL000283	b2-Microglobulin	cg08642016	0.0108023	0.000662523	1.93329e-47	0.000226413	4.85022e-05	4.00095e-06	0.011216	0.000672778	4.53784e-49	-1.82703	0.633925	0.00413695	0.038294	0.0141927
SL013490	BOC	cg05401364	-0.00261278	0.000631664	4.20059e-05	-0.000482782	6.86326e-05	7.35512e-12	-0.00207248	0.00066077	0.00182058	1.11912	0.427797	0.00919139	0.206789	0.0142086
SL004139	Ephrin-A3	cg23597057	-0.00165059	0.000598347	0.00603867	-0.000176788	3.57121e-05	1.04458e-06	-0.00126223	0.000609581	0.0389549	2.19676	0.778693	0.00499539	0.235286	0.0142448
SL008835	ASGR1	cg20682573	0.00378884	0.000825355	5.72401e-06	-0.000249597	6.03872e-05	4.25651e-05	0.0033071	0.000833163	8.37379e-05	-1.93008	0.634331	0.00248033	0.127148	0.0142715
SL000498	Leptin	cg22944461	0.00464792	0.0017562	0.00841113	-0.000176078	3.51706e-05	7.9259e-07	0.00350222	0.00179019	0.0510342	-6.50679	2.31589	0.00517261	1	0.0142794
SL006922	RAD51	cg04949308	0.0023141	0.000643963	0.000361909	0.000665602	0.000159503	3.60413e-05	0.00193581	0.000650379	0.00307236	0.568346	0.1878	0.00261639	0.163472	0.0142899
SL004153	M-CSF R	cg07260017	0.00315572	0.000731261	1.95386e-05	-0.000249072	7.20973e-05	0.000602372	0.00275027	0.000731947	0.000193905	-1.62784	0.468818	0.000565373	0.128481	0.0143255
SL004140	Ephrin-A4	cg25460143	0.00573248	0.000490466	8.59509e-28	0.000152873	3.39646e-05	8.59484e-06	0.00543365	0.00049715	7.43441e-25	1.95476	0.670014	0.00370284	0.0521293	0.0143583
SL001992	TNF sR-I	cg15626285	0.00973906	0.00065273	2.78778e-41	-0.00215914	0.000138861	4.76745e-44	0.00856745	0.000802917	7.12247e-24	-0.542631	0.218894	0.0135379	0.120301	0.0143634
SL000316	C4	cg11675917	0.00345375	0.000902977	0.000149105	-0.000349262	8.3531e-05	3.47898e-05	0.00292401	0.000912061	0.00144125	-1.51675	0.502323	0.0026749	0.153382	0.0143689
SL000316	C4	cg11675917	0.00345375	0.000902977	0.000149105	-0.000349262	8.3531e-05	3.47898e-05	0.00292401	0.000912061	0.00144125	-1.51675	0.502323	0.0026749	0.153382	0.0143689
SL003785	GAPDH, liver	cg15776355	0.00744038	0.00266461	0.00545254	-0.000999191	0.000124833	9.98076e-15	0.00489407	0.00282762	0.0841611	-2.54838	0.991351	0.0104675	1	0.0143856
SL005214	Semaphorin-6A	cg01165402	0.000994377	0.000408808	0.0153837	0.000725141	0.000101939	4.40989e-12	0.000641723	0.000428184	0.134642	0.486325	0.186618	0.00946138	1	0.014407
SL003182	Integrin aVb5	cg26190966	0.00343001	0.000804446	2.44607e-05	-0.000192724	5.71048e-05	0.000801744	0.00298323	0.000804256	0.000233634	-2.31825	0.65285	0.000423986	0.130257	0.0144331
SL002654	Epithelial cell kinase	cg13770446	0.00864778	0.000616564	2.01324e-37	-0.000349768	8.59611e-05	5.56412e-05	0.00829177	0.000621962	1.80035e-34	-1.01785	0.332489	0.00233392	0.0411679	0.0144345
SL005102	SHBG	cg05310646	0.00429326	0.00120378	0.000399889	-0.00040265	7.42401e-05	9.47404e-08	0.00346299	0.0012331	0.0051928	-2.06204	0.752333	0.00636812	0.193391	0.0144358
SL005102	SHBG	cg13098960	0.00429326	0.00120378	0.000399889	-0.000411421	4.73181e-05	6.25151e-17	0.00305394	0.00129161	0.0184741	-3.0123	1.18167	0.0111231	0.288667	0.0144363
SL000316	C4	cg11093373	0.00345375	0.000902977	0.000149105	-0.000248525	5.77853e-05	2.08374e-05	0.0039906	0.000913309	1.54554e-05	2.16012	0.726342	0.00309628	0.155438	0.0144405
SL000316	C4	cg11093373	0.00345375	0.000902977	0.000149105	-0.000248525	5.77853e-05	2.08374e-05	0.0039906	0.000913309	1.54554e-05	2.16012	0.726342	0.00309628	0.155438	0.0144405
SL008380	CATZ	cg00589161	0.0065145	0.000725539	7.12947e-18	-0.000322425	6.82114e-05	3.03941e-06	0.00606003	0.000737278	2.12986e-15	-1.40954	0.493172	0.00445633	0.0697631	0.014454
SL000565	Renin	cg17703324	0.00822615	0.00151308	8.85223e-08	-0.000213554	3.81332e-05	3.70137e-08	0.00715662	0.00155333	5.30132e-06	-5.00826	1.84326	0.00683711	0.130016	0.0145038
SL000316	C4	cg09788778	0.00345375	0.000902977	0.000149105	-0.000978867	0.000135026	1.80931e-12	0.00424559	0.00094774	9.47063e-06	0.808934	0.311551	0.00972422	0.229269	0.0145087
SL000316	C4	cg09788778	0.00345375	0.000902977	0.000149105	-0.000978867	0.000135026	1.80931e-12	0.00424559	0.00094774	9.47063e-06	0.808934	0.311551	0.00972422	0.229269	0.0145087
SL000283	b2-Microglobulin	cg25008614	0.0108023	0.000662523	1.93329e-47	-0.000507985	7.84693e-05	2.4712e-10	0.0102761	0.000687759	2.25734e-41	-1.03581	0.392397	0.0085822	0.0487098	0.014513
SL009412	DKK3	cg06943667	0.00804196	0.000657263	5.55454e-30	0.000196028	4.1455e-05	3.01303e-06	0.00845331	0.000667924	1.10723e-31	-2.09843	0.735135	0.00450664	0.0511507	0.0145352
SL006544	BGH3	cg11260904	0.00649287	0.000525424	1.8573e-30	0.000363806	5.34965e-05	3.28055e-11	0.00605752	0.000547918	2.50003e-25	1.19666	0.457015	0.00912859	0.0670506	0.0145437
SL004516	MBL	cg14441538	0.00435365	0.00144845	0.00279558	0.000369587	6.9612e-05	1.72306e-07	0.00533763	0.0014819	0.000350729	-2.66238	0.967451	0.0061608	0.226012	0.014556
SL004351	IL-17E	cg10731281	0.00208913	0.000858421	0.0153278	-0.000204929	4.0087e-05	4.69323e-07	0.00265581	0.000876193	0.00257548	2.76525	0.994403	0.00564678	0.271251	0.0145742
SL000316	C4	cg10917426	0.00345375	0.000902977	0.000149105	-0.000709142	0.000118177	4.01514e-09	0.00412849	0.00093175	1.17769e-05	0.951474	0.355813	0.00776357	0.195362	0.0145845
SL000316	C4	cg10917426	0.00345375	0.000902977	0.000149105	-0.000709142	0.000118177	4.01514e-09	0.00412849	0.00093175	1.17769e-05	0.951474	0.355813	0.00776357	0.195362	0.0145845
SL019019	PIANP	cg22222281	0.00297895	0.000717388	3.92765e-05	-0.00105679	0.000136975	7.70644e-14	0.00231497	0.000758195	0.00239662	-0.6283	0.244026	0.0103478	0.22289	0.0145936
SL002602	Trefoil factor 2	cg10270055	0.00958421	0.00102396	3.59784e-19	-0.000638722	7.17605e-05	1.30131e-17	0.0106594	0.00110245	3.03662e-20	1.68341	0.66282	0.011423	0.112187	0.0145948
SL005200	MICB	cg12589456	0.00502956	0.00119425	3.05953e-05	-0.000240297	5.62764e-05	2.3813e-05	0.00432406	0.00120756	0.000379467	-2.93594	0.986383	0.00307168	0.14027	0.0146154
SL004362	SCGF-alpha	cg13152535	0.00342982	0.00091736	0.00020837	0.000481958	9.53092e-05	6.18346e-07	0.00403011	0.000935774	2.03034e-05	-1.24552	0.446946	0.00554656	0.17502	0.0146608
SL000017	vWF	cg17458693	0.00683016	0.00172313	8.55537e-05	0.000385166	9.65902e-05	7.76625e-05	0.00584835	0.0017367	0.000822636	2.54904	0.82594	0.00215023	0.143746	0.0146611
SL005218	Siglec-7	cg04297995	0.00454039	0.000583299	4.75721e-14	-0.000482032	6.25852e-05	8.41141e-14	0.00507836	0.000616294	1.84971e-15	1.11606	0.433788	0.0104028	0.118487	0.0146758
SL004209	annexin II	cg02794990	0.00520034	0.0010573	1.21771e-06	-0.00110218	9.70423e-05	1.65003e-26	0.00380667	0.00119018	0.00147791	-1.26446	0.506212	0.012844	0.267995	0.0147041
SL008904	LYVE1	cg23678274	0.00276773	0.000738291	0.00020065	-0.000439992	6.32394e-05	1.21832e-11	0.00214318	0.000771826	0.00571833	-1.41946	0.54505	0.00951022	0.225654	0.0147276
SL010517	STK16	cg13782090	0.00233295	0.000731003	0.00151345	0.00107489	0.000135895	1.96751e-14	0.00302293	0.000774818	0.000110049	-0.641907	0.250378	0.010675	0.295754	0.0147345
SL001800	TNF sR-II	cg22866430	0.00807845	0.000674283	5.93877e-29	0.000774237	5.64836e-05	4.57783e-36	0.00701319	0.000796524	2.74568e-17	1.37588	0.555308	0.0135847	0.131864	0.0147614
SL002762	CgA	cg16324306	0.0111745	0.00390015	0.00435989	0.000785253	9.43337e-05	9.87016e-16	0.00732915	0.00415988	0.0787607	4.89695	1.92038	0.011098	1	0.0147625
SL001800	TNF sR-II	cg07138192	0.00807845	0.000674283	5.93877e-29	-0.000551257	0.000126645	1.66018e-05	0.00767773	0.000682422	4.40122e-26	-0.726922	0.246993	0.0034154	0.0496036	0.0147655
SL000316	C4	cg17784811	0.00345375	0.000902977	0.000149105	-0.000622512	6.81991e-05	2.28602e-18	0.00442556	0.000976401	7.46412e-06	1.5611	0.617064	0.0117474	0.281375	0.01477
SL000316	C4	cg17784811	0.00345375	0.000902977	0.000149105	-0.000622512	6.81991e-05	2.28602e-18	0.00442556	0.000976401	7.46412e-06	1.5611	0.617064	0.0117474	0.281375	0.01477
SL007056	BMP10	cg21663668	0.00277235	0.000837666	0.00100849	-0.000139061	3.94059e-05	0.000459654	0.00231041	0.000839544	0.00616085	-3.32187	0.9854	0.000812691	0.166626	0.0147844
SL004298	granzyme A	cg09659697	0.00349307	0.00064455	9.69641e-08	0.000402226	4.94801e-05	4.09644e-15	0.00287057	0.000685444	3.38065e-05	1.54763	0.605699	0.0109389	0.178209	0.0147876
SL000316	C4	cg14734916	0.00345375	0.000902977	0.000149105	-0.000619935	0.000133576	4.53971e-06	0.00401205	0.000916874	1.50264e-05	0.900569	0.314437	0.00437617	0.161648	0.0147963
SL000316	C4	cg14734916	0.00345375	0.000902977	0.000149105	-0.000619935	0.000133576	4.53971e-06	0.00401205	0.000916874	1.50264e-05	0.900569	0.314437	0.00437617	0.161648	0.0147963
SL002762	CgA	cg05200313	0.0111745	0.00390015	0.00435989	-0.000813543	0.000103934	3.48215e-14	0.0148095	0.0041278	0.000369549	4.46815	1.74286	0.0106754	0.325298	0.0148366
SL010496	CDK5/p35	cg25952886	0.00235015	0.000675992	0.000556778	0.00050217	9.07023e-05	5.23622e-08	0.00282391	0.000693635	5.52198e-05	-0.943426	0.347733	0.00692075	0.201587	0.0148393
SL000507	Lymphotoxin a1/b2	cg21048260	-0.00313023	0.000605886	3.57809e-07	-0.000262311	4.687e-05	3.78313e-08	-0.00270301	0.000622085	1.71931e-05	1.62868	0.601857	0.00706445	0.136482	0.0148408
SL000507	Lymphotoxin a1/b2	cg21048260	-0.00313023	0.000605886	3.57809e-07	-0.000262311	4.687e-05	3.78313e-08	-0.00270301	0.000622085	1.71931e-05	1.62868	0.601857	0.00706445	0.136482	0.0148408
SL003340	YKL-40	cg22372709	0.0292871	0.0025326	2.59076e-27	-0.000260585	4.44348e-05	8.64002e-09	0.0274409	0.00260845	2.52798e-23	-7.08479	2.64548	0.00767141	0.0630375	0.0148473
SL000507	Lymphotoxin a1/b2	cg00661399	-0.00313023	0.000605886	3.57809e-07	-0.000514211	8.22795e-05	9.47563e-10	-0.00266393	0.000627239	2.62851e-05	0.906817	0.342967	0.00847613	0.148965	0.0148889
SL000507	Lymphotoxin a1/b2	cg00661399	-0.00313023	0.000605886	3.57809e-07	-0.000514211	8.22795e-05	9.47563e-10	-0.00266393	0.000627239	2.62851e-05	0.906817	0.342967	0.00847613	0.148965	0.0148889
SL000414	Factor B	cg04405704	0.00161112	0.000502062	0.00142606	-0.00158764	0.000154082	1.61785e-22	0.00221528	0.000554363	7.51318e-05	0.380539	0.151879	0.0125753	0.374992	0.0149082
SL004726	CD97	cg13825475	0.0031131	0.000591494	2.18485e-07	0.000527148	9.013e-05	9.45772e-09	0.00354386	0.000609174	1.12747e-08	-0.817166	0.305268	0.00769964	0.138373	0.0149308
SL004209	annexin II	cg09885735	0.00520034	0.0010573	1.21771e-06	0.000507134	0.000109432	4.67692e-06	0.00455066	0.00107342	2.71315e-05	1.28106	0.447965	0.00443399	0.124929	0.0149466
SL008835	ASGR1	cg09841537	0.00378884	0.000825355	5.72401e-06	-0.000304249	4.11639e-05	7.01275e-13	0.00305733	0.000868046	0.000471381	-2.40431	0.933197	0.0102971	0.193069	0.0149805
SL005087	IGFBP-7	cg13210763	0.0033605	0.00049186	2.68587e-11	0.000646433	0.000154651	3.49653e-05	0.00307497	0.000496882	1.35603e-09	0.44171	0.147657	0.00292725	0.0849682	0.0149884
SL003916	kallikrein 12	cg06572160	0.00482181	0.00104947	5.61842e-06	0.000818877	8.37294e-05	1.22843e-20	0.00602063	0.00114744	2.37285e-07	-1.46397	0.582946	0.0123721	0.248623	0.014998
SL000310	C1r	cg12216208	0.00214202	0.00056859	0.000186641	0.000610488	0.000121982	7.99755e-07	0.00177436	0.000579703	0.00233776	0.602243	0.216453	0.00562103	0.171643	0.0150243
SL000573	SAP	cg14969185	0.00254901	0.000644087	8.78015e-05	-0.00032299	5.70461e-05	2.65191e-08	0.0030057	0.000661823	7.16084e-06	1.41396	0.525147	0.00735353	0.179165	0.015034
SL006922	RAD51	cg18494742	0.0023141	0.000643963	0.000361909	0.000363879	9.76324e-05	0.000218203	0.00195635	0.00064715	0.00264463	0.983171	0.306435	0.0014294	0.154598	0.0150344
SL003522	ERP29	cg17415650	0.00627639	0.000827446	1.8667e-13	-0.000543706	7.37675e-05	8.00211e-13	0.00700587	0.000869811	6.99955e-15	1.34168	0.52094	0.0103228	0.116226	0.0150432
SL000017	vWF	cg14292870	0.00683016	0.00172313	8.55537e-05	0.000578584	0.000113183	4.69273e-07	0.00570083	0.00175891	0.00127763	1.95188	0.706288	0.00594809	0.165344	0.0150545
SL007310	RAC3	cg08701659	-0.00562849	0.00230917	0.0151709	-0.000274198	7.22956e-05	0.000168966	-0.00434529	0.00232239	0.0619777	4.67985	1.478	0.00164697	1	0.0150721
SL011535	RBM39	cg15636879	0.00299077	0.00124005	0.0162687	0.000624866	7.81884e-05	1.10419e-14	0.00416889	0.00131629	0.00164313	-1.8854	0.73906	0.011066	0.393919	0.0150879
SL012457	NXPH1	cg15444149	0.0029667	0.000800922	0.000238155	-0.000624925	0.000101414	1.57949e-09	0.00235962	0.00082818	0.00458231	-0.971438	0.367432	0.00847973	0.20463	0.0151125
SL003182	Integrin aVb5	cg06755992	0.00343001	0.000804446	2.44607e-05	0.000540147	7.89379e-05	2.52626e-11	0.0027633	0.000839615	0.00107577	1.23432	0.475284	0.00970969	0.194377	0.0151813
SL000382	CK-MB	cg21265439	-0.00766185	0.00165003	4.4849e-06	0.000398537	7.04198e-05	2.68463e-08	-0.00882773	0.00169537	2.91051e-07	2.9254	1.08869	0.00747117	0.152167	0.0152084
SL008822	EMR2	cg19517476	0.00443812	0.000772457	1.67797e-08	-0.000831103	0.000100302	1.31824e-15	0.00368211	0.000823675	9.87151e-06	-0.909656	0.358515	0.0115043	0.170346	0.0152623
SL002525	C2	cg08209711	0.00222251	0.000451497	1.19681e-06	-0.000386646	8.01525e-05	1.92396e-06	0.00250687	0.000459442	8.00639e-08	0.73544	0.262106	0.00523345	0.127943	0.0152904
SL008835	ASGR1	cg15416363	0.00378884	0.000825355	5.72401e-06	-0.000284339	5.47612e-05	3.13465e-07	0.00324226	0.000843392	0.000138099	-1.92227	0.700811	0.00632972	0.14426	0.015295
SL008099	CAPG	cg00710862	0.0119541	0.000940608	6.58736e-32	-0.000698001	0.000151037	4.96266e-06	0.01138	0.000954903	1.0616e-28	-0.822499	0.288767	0.00459338	0.0480258	0.0153182
SL000250	a2-Antiplasmin	cg10440011	-0.00316463	0.000449491	7.08532e-12	0.00117398	0.000142174	1.62459e-15	-0.00360289	0.00047908	2.93604e-13	0.373314	0.14718	0.0115314	0.138487	0.0153235
SL005173	IL-10 Ra	cg18585693	0.00233681	0.000465393	7.37574e-07	0.000769461	9.35475e-05	2.04072e-15	0.00188516	0.000495713	0.000162456	0.586968	0.231345	0.0115067	0.193276	0.0153306
SL000507	Lymphotoxin a1/b2	cg08972588	-0.00313023	0.000605886	3.57809e-07	-0.00116008	0.000149385	5.42415e-14	-0.00257079	0.00064092	7.06633e-05	0.482242	0.189001	0.0110519	0.178722	0.0153489
SL000507	Lymphotoxin a1/b2	cg08972588	-0.00313023	0.000605886	3.57809e-07	-0.00116008	0.000149385	5.42415e-14	-0.00257079	0.00064092	7.06633e-05	0.482242	0.189001	0.0110519	0.178722	0.0153489
SL008623	CNTN2	cg03948781	0.00612979	0.000933543	1.403e-10	0.000606891	0.000193032	0.00177488	0.00664374	0.000930001	3.60599e-12	-0.846857	0.222733	0.000162925	0.0838446	0.0153961
SL004672	BCMA	cg03623401	0.00393033	0.000664403	6.48892e-09	-0.000779446	0.000157845	1.10827e-06	0.00350678	0.000676933	3.33038e-07	-0.543399	0.195465	0.00566022	0.107765	0.0154138
SL000408	Epo	cg15140703	0.00454535	0.00115058	9.03419e-05	0.00105679	0.000124409	2.83691e-16	0.00569511	0.00123102	4.85932e-06	-1.08798	0.430559	0.0118455	0.252953	0.0154353
SL005200	MICB	cg13808979	0.00502956	0.00119425	3.05953e-05	-0.000655927	0.00019757	0.000972682	0.00567934	0.0011936	2.62979e-06	0.990622	0.279856	0.000441818	0.129191	0.0154547
SL000250	a2-Antiplasmin	cg09927651	-0.00316463	0.000449491	7.08532e-12	-0.000596946	6.88507e-05	7.61504e-17	-0.00270714	0.000482303	3.46318e-08	0.766395	0.303944	0.0120261	0.144565	0.01547
SL004733	sLRP1	cg00753885	0.00327076	0.000845016	0.000124461	-0.0008236	7.85132e-05	3.37834e-23	0.00224203	0.000936539	0.0170739	-1.24907	0.50226	0.013245	0.314525	0.0155277
SL002505	ANP	cg08945450	0.00396435	0.00131945	0.00280631	-0.000593523	9.06871e-05	1.6063e-10	0.00501091	0.00137136	0.00028831	1.7633	0.677064	0.00950667	0.263992	0.0155298
SL000414	Factor B	cg04528352	0.00161112	0.000502062	0.00142606	-0.000400214	5.49326e-05	1.42426e-12	0.00204822	0.000527317	0.000117918	1.09217	0.42587	0.0106514	0.271301	0.0155607
SL008381	CATF	cg21994822	0.00476149	0.000668676	4.22755e-12	-0.000340682	0.000100035	0.000718781	0.00512448	0.000669243	1.15975e-13	1.06549	0.310046	0.000643503	0.0762351	0.0155632
SL005200	MICB	cg13409674	0.00502956	0.00119425	3.05953e-05	-0.000587002	0.000201792	0.00380412	0.00572526	0.00118219	1.75783e-06	1.18517	0.27213	1.64519e-05	0.138321	0.0155644
SL000316	C4	cg25391023	0.00345375	0.000902977	0.000149105	-0.000543271	9.11194e-05	4.99846e-09	0.00411718	0.000931465	1.23543e-05	1.22117	0.461546	0.00843196	0.192089	0.0155891
SL000316	C4	cg25391023	0.00345375	0.000902977	0.000149105	-0.000543271	9.11194e-05	4.99846e-09	0.00411718	0.000931465	1.23543e-05	1.22117	0.461546	0.00843196	0.192089	0.0155891
SL007674	LY9	cg27582585	0.00223361	0.000754654	0.00323832	-0.000250055	7.41829e-05	0.000813008	0.00182607	0.000754915	0.0159567	-1.62979	0.469721	0.000570457	0.182456	0.0156183
SL000414	Factor B	cg04581938	0.00161112	0.000502062	0.00142606	-0.000891475	5.73022e-05	4.55018e-44	0.00250238	0.000618031	6.04872e-05	0.999759	0.408519	0.0147719	0.553192	0.0156254
SL000408	Epo	cg00553149	0.00454535	0.00115058	9.03419e-05	0.00097065	0.000137704	6.71316e-12	0.00551667	0.00120424	5.98235e-06	-1.00068	0.388889	0.0103924	0.213694	0.015642
SL014009	HDGR2	cg11271925	0.00433966	0.000955934	7.21352e-06	-0.000450788	0.000108609	3.95716e-05	0.00379248	0.000965537	9.89761e-05	-1.21382	0.408233	0.00310173	0.126088	0.0156437
SL005200	MICB	cg14630748	0.00502956	0.00119425	3.05953e-05	-0.000947756	0.000170469	4.61293e-08	0.00585889	0.00122583	2.3772e-06	0.875049	0.326219	0.00757629	0.164892	0.015696
SL008835	ASGR1	cg06890522	0.00378884	0.000825355	5.72401e-06	-0.000577562	6.91896e-05	8.40056e-16	0.00297965	0.000881008	0.00078147	-1.40105	0.555364	0.0119835	0.213573	0.0157399
SL005195	LAG-3	cg21343895	0.00746282	0.00113219	1.20059e-10	-0.000430694	6.08079e-05	5.35247e-12	0.00650618	0.00118536	6.72088e-08	-2.22116	0.864743	0.0105281	0.128188	0.0157481
SL004298	granzyme A	cg18700420	0.00349307	0.00064455	9.69641e-08	0.000428174	0.000101841	3.15152e-05	0.00312226	0.000651432	2.22788e-06	0.866017	0.293593	0.00334425	0.106155	0.0157483
SL006910	Cathepsin V	cg13696609	-0.0126718	0.000843692	1.06594e-41	0.000930831	0.000103039	4.75151e-18	-0.0117819	0.000910972	8.55714e-33	-0.955968	0.381659	0.0126024	0.0702226	0.015791
SL001800	TNF sR-II	cg16432031	0.00807845	0.000674283	5.93877e-29	0.000249426	5.29103e-05	3.22802e-06	0.00766429	0.000685348	8.01324e-26	1.66045	0.591701	0.00522701	0.0512672	0.0158944
SL004915	NCC27	cg20193104	-0.0071386	0.00266416	0.0076389	-0.000107785	3.09705e-05	0.000548876	-0.00570648	0.00266968	0.0330865	13.2868	3.97568	0.000899986	0.200617	0.0159281
SL005200	MICB	cg21722170	0.00502956	0.00119425	3.05953e-05	-0.000539784	0.000101083	1.47074e-07	0.00422763	0.00122268	0.000596189	-1.48566	0.550083	0.00717614	0.159445	0.0159491
SL000062	PSA	cg14203721	0.0052903	0.00161788	0.00115699	-0.000578309	6.56845e-05	2.72137e-17	0.00694803	0.00173946	7.5582e-05	2.86653	1.14436	0.0125953	0.313354	0.0159833
SL000414	Factor B	cg19248557	0.00161112	0.000502062	0.00142606	-0.000127438	3.39234e-05	0.000194596	0.001886	0.000504901	0.000211296	2.15693	0.687176	0.00180675	0.17061	0.0160097
SL000316	C4	cg09423875	0.00345375	0.000902977	0.000149105	-0.000505655	8.786e-05	1.59195e-08	0.00409565	0.000929126	1.30315e-05	1.26944	0.478651	0.00827873	0.185856	0.0160103
SL000316	C4	cg09423875	0.00345375	0.000902977	0.000149105	-0.000505655	8.786e-05	1.59195e-08	0.00409565	0.000929126	1.30315e-05	1.26944	0.478651	0.00827873	0.185856	0.0160103
SL000507	Lymphotoxin a1/b2	cg09001226	-0.00313023	0.000605886	3.57809e-07	0.000759866	0.000121867	1.03108e-09	-0.00267067	0.000627242	2.5102e-05	-0.604784	0.231601	0.00931788	0.146812	0.0160129
SL000507	Lymphotoxin a1/b2	cg09001226	-0.00313023	0.000605886	3.57809e-07	0.000759866	0.000121867	1.03108e-09	-0.00267067	0.000627242	2.5102e-05	-0.604784	0.231601	0.00931788	0.146812	0.0160129
SL001902	BCAM	cg18381455	0.00311676	0.000633306	1.20506e-06	0.000671043	0.000125045	1.28451e-07	0.00268937	0.000648657	4.04029e-05	0.636907	0.236329	0.00730115	0.137127	0.0160243
SL019019	PIANP	cg14292870	0.00297895	0.000717388	3.92765e-05	0.000572241	0.000113135	6.15443e-07	0.0034415	0.000732071	3.43811e-06	-0.808298	0.29517	0.00641646	0.15527	0.0160343
SL004915	NCC27	cg06828418	-0.0071386	0.00266416	0.0076389	0.000370048	5.33557e-05	1.38552e-11	-0.00493577	0.00278364	0.0768717	-5.95282	2.31906	0.0105783	1	0.0160702
SL000640	Nidogen	cg20251199	0.00320261	0.000821076	0.000110372	-0.000567566	9.35224e-05	2.70484e-09	0.00380925	0.000848029	8.95283e-06	1.06883	0.407631	0.00903162	0.189418	0.0160839
SL019019	PIANP	cg16399745	0.00297895	0.000717388	3.92765e-05	-0.000769972	0.000104924	1.00165e-12	0.00235389	0.000754117	0.00191491	-0.811805	0.318617	0.0111658	0.209828	0.0160864
SL004351	IL-17E	cg21828716	0.00208913	0.000858421	0.0153278	-0.000618436	6.95383e-05	1.38472e-17	0.0029769	0.000924446	0.00137255	1.4355	0.574166	0.0127642	0.424944	0.0160906
SL000414	Factor B	cg04573510	0.00161112	0.000502062	0.00142606	-0.000362208	5.06579e-05	3.48028e-12	0.00203865	0.000526327	0.000123136	1.18033	0.461828	0.0109199	0.265358	0.0160997
SL004594	Troponin I, skeletal, fast twitch	cg08012275	0.00700017	0.00153944	6.9748e-06	-0.00014348	3.43474e-05	3.53576e-05	0.00612087	0.00155559	9.629e-05	-6.12842	2.08144	0.00340244	0.125612	0.0161019
SL004159	TRAIL R4	cg12271419	0.0020573	0.000842037	0.0149349	-0.000688973	0.000102047	4.47545e-11	0.00137516	0.000877793	0.117903	-0.990092	0.384461	0.0103315	1	0.0161206
SL004594	Troponin I, skeletal, fast twitch	cg03982897	0.00700017	0.00153944	6.9748e-06	-0.000843392	7.55622e-05	9.69074e-26	0.00897126	0.00172747	3.1223e-07	2.33709	0.948801	0.0141392	0.281577	0.0161578
SL003328	Factor I	cg05248542	0.00288155	0.000441516	1.79569e-10	0.000457702	4.50429e-05	5.29464e-22	0.0023644	0.000486229	1.5974e-06	1.12987	0.456467	0.0136772	0.179468	0.0161754
SL006522	LG3BP	cg26651978	0.00311453	0.000973194	0.00146818	-0.000532217	8.1677e-05	1.9053e-10	0.00387651	0.00101104	0.000143651	1.43171	0.553329	0.00997667	0.244654	0.0161816
SL000507	Lymphotoxin a1/b2	cg25403205	-0.00313023	0.000605886	3.57809e-07	0.000866952	0.000183653	3.13565e-06	-0.00275832	0.000615954	9.53777e-06	-0.428985	0.153519	0.00542052	0.118812	0.0161886
SL000507	Lymphotoxin a1/b2	cg25403205	-0.00313023	0.000605886	3.57809e-07	0.000866952	0.000183653	3.13565e-06	-0.00275832	0.000615954	9.53777e-06	-0.428985	0.153519	0.00542052	0.118812	0.0161886
SL004153	M-CSF R	cg22459052	0.00315572	0.000731261	1.95386e-05	-0.000194322	5.27372e-05	0.000256388	0.00355176	0.00073479	1.83449e-06	2.03808	0.64229	0.00160992	0.1255	0.0161969
SL004557	CD59	cg04504043	0.00651363	0.00049014	2.70656e-34	-0.000811956	9.31582e-05	5.39124e-17	0.00701113	0.00052637	2.06872e-34	0.612719	0.244978	0.0127307	0.0763785	0.0162128
SL004579	Macrophage mannose receptor	cg09835225	0.00809448	0.000593677	9.07199e-36	0.000500723	6.8438e-05	1.14892e-12	0.00758095	0.000623694	1.19389e-29	1.02557	0.402938	0.0112483	0.0634416	0.0162204
SL005158	DC-SIGNR	cg04522694	0.00235007	0.000395417	5.5487e-09	-0.000350031	7.39594e-05	2.95836e-06	0.00259253	0.000402018	2.87852e-10	0.692703	0.248258	0.00548749	0.103175	0.0162338
SL000316	C4	cg08491668	0.00345375	0.000902977	0.000149105	-0.000350824	8.63381e-05	5.6973e-05	0.00396194	0.000911357	1.70267e-05	1.44856	0.486116	0.0030386	0.147141	0.0162632
SL000316	C4	cg08491668	0.00345375	0.000902977	0.000149105	-0.000350824	8.63381e-05	5.6973e-05	0.00396194	0.000911357	1.70267e-05	1.44856	0.486116	0.0030386	0.147141	0.0162632
SL000250	a2-Antiplasmin	cg06053959	-0.00316463	0.000449491	7.08532e-12	-0.000320476	8.39535e-05	0.000153549	-0.00291845	0.000452389	2.84274e-10	0.768188	0.248405	0.00210692	0.077793	0.0162649
SL005200	MICB	cg00184953	0.00502956	0.00119425	3.05953e-05	-0.000585385	9.93434e-05	7.40897e-09	0.00416698	0.00123099	0.00077342	-1.47352	0.559941	0.00878841	0.171502	0.0162683
SL002684	CSF-1	cg26020161	0.00316027	0.000726803	1.69535e-05	-0.000350074	6.04983e-05	1.3392e-08	0.00264292	0.000748175	0.000453788	-1.47783	0.559545	0.0085478	0.163704	0.0162748
SL014091	SORC2	cg22028075	-0.0112039	0.00170032	1.23542e-10	0.000451117	5.55512e-05	4.46939e-15	-0.0128293	0.00180974	5.25665e-12	3.60321	1.43285	0.0122603	0.145081	0.0162977
SL001766	HCG	cg00353916	0.0280648	0.00244188	4.90565e-27	-0.000256849	9.59336e-05	0.00768688	0.0264534	0.0023876	1.97176e-25	-6.27394	1.15395	8.84099e-08	0.0574191	0.0163089
SL003916	kallikrein 12	cg00086493	0.00482181	0.00104947	5.61842e-06	-0.000360811	9.69879e-05	0.000223872	0.00539043	0.00105504	4.76556e-07	1.57594	0.501321	0.00177792	0.117925	0.0163454
SL000316	C4	cg16167809	0.00345375	0.000902977	0.000149105	-0.000568726	9.45406e-05	3.68519e-09	0.00411598	0.000932226	1.26254e-05	1.16441	0.444917	0.00916317	0.191741	0.0164015
SL000316	C4	cg16167809	0.00345375	0.000902977	0.000149105	-0.000568726	9.45406e-05	3.68519e-09	0.00411598	0.000932226	1.26254e-05	1.16441	0.444917	0.00916317	0.191741	0.0164015
SL018548	a1-Antichymotrypsin	cg08257009	0.00337759	0.00064868	2.91427e-07	-0.000943179	0.00012452	2.03054e-13	0.00395684	0.000684315	1.37337e-08	0.614148	0.242786	0.0117569	0.171499	0.0164252
SL000316	C4	cg05045332	0.00345375	0.000902977	0.000149105	-0.000176978	6.55346e-05	0.00718127	0.0028736	0.000885023	0.00125299	-3.2781	0.628095	2.7408e-07	0.167977	0.0164638
SL000316	C4	cg05045332	0.00345375	0.000902977	0.000149105	-0.000176978	6.55346e-05	0.00718127	0.0028736	0.000885023	0.00125299	-3.2781	0.628095	2.7408e-07	0.167977	0.0164638
SL014008	FUT5	cg11904429	0.00729715	0.00101363	2.50156e-12	-0.00057492	9.59832e-05	4.25306e-09	0.00803493	0.00104592	9.61551e-14	1.28327	0.490337	0.00916156	0.101105	0.0164762
SL001997	IL-1 sRI	cg26708940	0.00289341	0.000540984	1.40642e-07	-0.00018418	3.61252e-05	5.03097e-07	0.00254489	0.000552337	5.29935e-06	-1.89231	0.696422	0.00683516	0.120454	0.0164897
SL000316	C4	cg06111526	0.00345375	0.000902977	0.000149105	-0.000347789	5.52029e-05	7.02301e-10	0.00414089	0.000935675	1.20594e-05	1.97571	0.762071	0.00983391	0.198952	0.0165074
SL000316	C4	cg06111526	0.00345375	0.000902977	0.000149105	-0.000347789	5.52029e-05	7.02301e-10	0.00414089	0.000935675	1.20594e-05	1.97571	0.762071	0.00983391	0.198952	0.0165074
SL000057	Thymidine kinase	cg26164886	0.00177453	0.000727702	0.0151299	-0.00028229	4.22791e-05	7.16394e-11	0.00119172	0.000757999	0.116607	-2.06461	0.803732	0.0105258	1	0.0165092
SL000316	C4	cg14737484	0.00345375	0.000902977	0.000149105	-0.000699477	0.000121309	1.49931e-08	0.00409301	0.000929331	1.32535e-05	0.913907	0.346704	0.00867665	0.18509	0.016514
SL000316	C4	cg14737484	0.00345375	0.000902977	0.000149105	-0.000699477	0.000121309	1.49931e-08	0.00409301	0.000929331	1.32535e-05	0.913907	0.346704	0.00867665	0.18509	0.016514
SL000573	SAP	cg16109680	0.00254901	0.000644087	8.78015e-05	-0.000728378	8.07728e-05	5.35096e-18	0.00322145	0.000695223	4.69738e-06	0.923197	0.371316	0.0132663	0.263803	0.0165367
SL001766	HCG	cg14094987	0.0280648	0.00244188	4.90565e-27	-0.000260821	4.25914e-05	1.96748e-09	0.0298734	0.002524	2.23951e-28	6.93408	2.66223	0.0094974	0.0644421	0.0165377
SL005158	DC-SIGNR	cg24321467	0.00235007	0.000395417	5.5487e-09	0.000375531	8.86304e-05	2.74063e-05	0.0025759	0.000399868	3.00176e-10	-0.601358	0.207018	0.00385283	0.0960946	0.0165813
SL010381	Soggy-1	cg18885992	-0.00540006	0.000766141	6.74941e-12	-0.000249019	4.37574e-05	2.26674e-08	-0.00486396	0.000787788	1.47694e-09	2.15288	0.815496	0.00857705	0.0992778	0.0166281
SL010514	PTK6	cg06228507	0.00667897	0.00115642	1.42119e-08	0.00103498	0.000112306	1.14152e-18	0.00544837	0.00125247	1.68104e-05	1.18901	0.479503	0.0135118	0.184249	0.0166433
SL003643	Glutathione S-transferase Pi	cg18464296	0.00745587	0.0014225	2.43742e-07	-0.000351344	6.47772e-05	9.46044e-08	0.00650017	0.00145776	1.03745e-05	-2.72011	1.01933	0.00788926	0.12818	0.0166465
SL002684	CSF-1	cg05951137	0.00316027	0.000726803	1.69535e-05	-9.07593e-05	2.5982e-05	0.000524023	0.00277318	0.000728675	0.000160735	-4.26508	1.2975	0.00109062	0.122488	0.0166711
SL010465	MATN2	cg19357416	0.00360514	0.00047914	2.85249e-13	0.000335399	7.54315e-05	1.09806e-05	0.00332395	0.000485668	2.49801e-11	0.838363	0.295181	0.00471116	0.0779959	0.0166866
SL003324	Coagulation Factor X	cg01899620	-0.00218226	0.000534049	5.17964e-05	-0.0011583	0.000158758	1.32451e-12	-0.00172276	0.000561037	0.00226367	0.396704	0.156602	0.0116376	0.210563	0.0167086
SL004639	TrkC	cg04788288	0.00258377	0.000560973	5.32999e-06	-0.000276716	4.14398e-05	7.05301e-11	0.0030296	0.000584108	3.22265e-07	1.61113	0.628737	0.0107119	0.172548	0.0167394
SL008835	ASGR1	cg09245073	0.00378884	0.000825355	5.72401e-06	-0.000285469	6.34525e-05	8.67756e-06	0.0042761	0.000837098	4.79256e-07	1.70686	0.604525	0.0049591	0.128603	0.016779
SL000316	C4	cg01573622	0.00345375	0.000902977	0.000149105	-0.00029256	7.36686e-05	8.30696e-05	0.00395275	0.000910558	1.75004e-05	1.70563	0.569666	0.00290301	0.14448	0.0168139
SL000316	C4	cg01573622	0.00345375	0.000902977	0.000149105	-0.00029256	7.36686e-05	8.30696e-05	0.00395275	0.000910558	1.75004e-05	1.70563	0.569666	0.00290301	0.14448	0.0168139
SL004650	sFRP-3	cg15735129	0.00510335	0.000637964	1.05487e-14	-0.000698033	9.0892e-05	9.91802e-14	0.005679	0.000674271	4.93958e-16	0.824683	0.327856	0.012236	0.1128	0.0168287
SL000519	MIP-1a	cg08214029	0.0085858	0.00120074	3.46349e-12	-0.000438517	6.96069e-05	7.02274e-10	0.00767627	0.00124419	1.51386e-09	-2.07411	0.802843	0.0100926	0.105934	0.0168356
SL005200	MICB	cg18505959	0.00502956	0.00119425	3.05953e-05	-0.000990643	6.39295e-05	8.51967e-44	0.00294248	0.00146832	0.0456653	-2.10679	0.871139	0.0159799	0.414963	0.0168709
SL004126	4-1BB	cg15148088	0.00341222	0.000769818	1.16934e-05	0.000262968	7.80242e-05	0.000814843	0.00382007	0.000770548	1.01053e-06	-1.55097	0.457801	0.000765866	0.119528	0.0168775
SL002706	CD23	cg19981796	0.00419297	0.00104102	6.59734e-05	0.000971801	0.000115169	4.33381e-16	0.00317312	0.00111316	0.00456308	1.04944	0.421353	0.0131075	0.243228	0.0169054
SL005200	MICB	cg21358678	0.00502956	0.00119425	3.05953e-05	9.8619e-05	3.22019e-05	0.00232493	0.00438489	0.00118892	0.000253258	6.53702	1.7133	0.000154753	0.128177	0.0169254
SL003184	sLeptin R	cg17590234	0.00473148	0.00175927	0.00741871	-0.000397767	7.17853e-05	5.08618e-08	0.00593057	0.00180558	0.00110006	3.01454	1.13895	0.00840746	0.253427	0.0169264
SL007100	LKHA4	cg05173159	0.00901516	0.00106301	3.10797e-16	-0.000380731	5.09934e-05	4.19777e-13	0.00994428	0.00111933	1.48723e-17	2.44033	0.968432	0.0120792	0.103061	0.0169603
SL005213	RELT	cg16017089	0.0071169	0.000635777	7.27348e-26	-0.000558435	0.000202281	0.00600053	0.00673517	0.00062641	3.52244e-24	-0.683583	0.143821	2.69249e-06	0.053638	0.0169762
SL012769	FAM3D	cg17338821	0.0103652	0.0018872	6.58605e-08	0.000347254	0.000105512	0.00107489	0.011359	0.00188685	3.58227e-09	-2.8618	0.825901	0.000580115	0.0958755	0.0170185
SL005200	MICB	cg21435316	0.00502956	0.00119425	3.05953e-05	-0.000280895	7.88132e-05	0.000403762	0.00439517	0.0011986	0.000274564	-2.25848	0.70322	0.00141362	0.126134	0.0170391
SL000344	Cathepsin D	cg18504190	0.00726572	0.00112617	2.85095e-10	-0.000536072	0.00011868	8.01675e-06	0.00793277	0.00114263	1.34835e-11	1.24433	0.442969	0.0051844	0.0918079	0.0170602
SL006922	RAD51	cg07970400	0.0023141	0.000643963	0.000361909	-0.000249997	3.75115e-05	7.71233e-11	0.00282554	0.00067066	3.04108e-05	2.04578	0.800833	0.0109581	0.22101	0.0170635
SL006830	complement factor H-related 5	cg16353957	0.00294053	0.000809926	0.000314792	0.000201657	3.71464e-05	9.24173e-08	0.00348366	0.000830199	3.26534e-05	-2.6933	1.01434	0.00820366	0.184703	0.0170696
SL003785	GAPDH, liver	cg21249754	0.00744038	0.00266461	0.00545254	-0.000362217	6.80851e-05	1.62625e-07	0.00919581	0.00272755	0.000811224	4.84636	1.81663	0.00790694	0.235933	0.0170914
SL005207	NKp46	cg01434523	0.00249152	0.000718363	0.000573988	0.000451144	8.70149e-05	3.27313e-07	0.00295929	0.000734421	6.56398e-05	-1.03687	0.386093	0.00750856	0.187749	0.0170959
SL005200	MICB	cg18643176	0.00502956	0.00119425	3.05953e-05	-0.000166434	4.29764e-05	0.00012342	0.00437932	0.00120304	0.000303768	-3.90692	1.29123	0.00262113	0.129285	0.0171118
SL004858	GFRa-1	cg07109438	0.00743201	0.000947093	3.0441e-14	-0.000462227	6.45233e-05	3.16468e-12	0.00663431	0.000993015	6.93434e-11	-1.72579	0.682607	0.0118004	0.107334	0.0171204
SL000320	C5a	cg14254686	0.00817347	0.000995899	2.32932e-15	-0.000211072	5.26442e-05	7.10803e-05	0.00872257	0.00100474	6.99312e-17	2.60147	0.877478	0.00318843	0.0671806	0.0171348
SL000316	C4	cg00848392	0.00345375	0.000902977	0.000149105	0.000842359	0.000126186	7.18811e-11	0.00273708	0.000940486	0.00378848	0.85079	0.333462	0.0110565	0.207505	0.0171608
SL000316	C4	cg00848392	0.00345375	0.000902977	0.000149105	0.000842359	0.000126186	7.18811e-11	0.00273708	0.000940486	0.00378848	0.85079	0.333462	0.0110565	0.207505	0.0171608
SL005221	SREC-I	cg02151609	0.00427715	0.000998574	2.2455e-05	-0.000132843	3.27915e-05	5.98603e-05	0.00482956	0.00100789	2.23879e-06	4.15834	1.41115	0.00337531	0.129153	0.017171
SL004145	HVEM	cg09767587	0.00272435	0.00071403	0.00015476	0.000325299	9.49035e-05	0.000664205	0.00234769	0.000715383	0.00111148	1.15787	0.349285	0.000990193	0.138255	0.0171776
SL004118	TrATPase	cg16667279	0.00435046	0.000684778	5.11612e-10	0.00103033	9.75106e-05	1.72045e-23	0.00352663	0.000759888	4.54174e-06	0.799587	0.327083	0.0148799	0.189368	0.0172336
SL007502	ST4S6	cg19634573	0.00401091	0.000464081	9.36471e-17	-0.000662228	0.000138569	2.37938e-06	0.00429419	0.000472184	2.96911e-18	0.427771	0.155722	0.0062527	0.0706279	0.0172373
SL000414	Factor B	cg23574899	0.00161112	0.000502062	0.00142606	-0.000191522	6.43218e-05	0.00306064	0.00188475	0.000498914	0.000179346	1.42872	0.36014	8.45187e-05	0.169839	0.0172466
SL014268	OX2G	cg13765303	0.00159982	0.000574712	0.00559834	0.000540769	5.62213e-05	4.63831e-20	0.000966359	0.000626976	0.12394	1.17141	0.476597	0.0143495	1	0.0172498
SL004145	HVEM	cg26017484	0.00272435	0.00071403	0.00015476	-0.000385825	6.83938e-05	2.97458e-08	0.00223096	0.000733879	0.00250317	-1.27878	0.48682	0.00891137	0.181102	0.0172519
SL002508	IL-18 BPa	cg23227726	0.00794411	0.0006274	1.04782e-31	-0.000405301	5.42299e-05	4.00399e-13	0.00849196	0.000660808	1.79207e-32	1.35171	0.538069	0.0123442	0.0689629	0.0172551
SL000250	a2-Antiplasmin	cg22556056	-0.00316463	0.000449491	7.08532e-12	0.000413121	4.20562e-05	8.71561e-21	-0.00265996	0.000492066	1.044e-07	-1.22161	0.497772	0.0144952	0.159473	0.0172669
SL004363	SCGF-alpha	cg13152535	0.00377795	0.00100635	0.000196402	0.000481958	9.53092e-05	6.18346e-07	0.00441603	0.00102709	2.09427e-05	-1.32393	0.490559	0.00721696	0.168896	0.0172682
SL004859	GITR	cg10824915	0.00272492	0.00112582	0.015897	-0.000507951	0.000103952	1.42832e-06	0.00342522	0.00114704	0.00297912	1.37868	0.505826	0.00666836	0.256998	0.0172968
SL000316	C4	cg23287992	0.00345375	0.000902977	0.000149105	0.00079047	0.000195084	5.9726e-05	0.00295364	0.000911499	0.00128127	0.632681	0.215195	0.00344921	0.144803	0.0173304
SL000316	C4	cg23287992	0.00345375	0.000902977	0.000149105	0.00079047	0.000195084	5.9726e-05	0.00295364	0.000911499	0.00128127	0.632681	0.215195	0.00344921	0.144803	0.0173304
SL003201	VEGF sR2	cg09632907	-0.00271309	0.00048045	2.86954e-08	0.000510924	7.36397e-05	1.36205e-11	-0.0031052	0.000502111	1.38543e-09	0.767441	0.303077	0.01167	0.144523	0.017374
SL014009	HDGR2	cg24459140	0.00433966	0.000955934	7.21352e-06	-0.000152854	4.59492e-05	0.000950116	0.00383936	0.000956438	6.97152e-05	-3.27302	0.962111	0.000728095	0.115284	0.0173863
SL005171	IGFBP-4	cg02944084	0.00333642	0.000643607	3.26812e-07	-0.0010413	8.43449e-05	2.03067e-30	0.00423253	0.000739293	1.87692e-08	0.86056	0.355059	0.0157509	0.268582	0.017392
SL004351	IL-17E	cg19646112	0.00208913	0.000858421	0.0153278	0.000402067	5.86603e-05	2.33211e-11	0.0027825	0.000896164	0.00202198	-1.7245	0.680513	0.0116069	0.33189	0.0174605
SL016969	CSRP3	cg12715569	0.00668653	0.00135806	1.1882e-06	0.000336758	7.28314e-05	4.9081e-06	0.00587944	0.00137938	2.45822e-05	2.39666	0.865019	0.0058226	0.120704	0.0174715
SL000507	Lymphotoxin a1/b2	cg23164535	-0.00313023	0.000605886	3.57809e-07	-0.00058427	8.10482e-05	2.36471e-12	-0.00261811	0.000635839	4.54954e-05	0.876518	0.348428	0.0122259	0.163606	0.0175408
SL000507	Lymphotoxin a1/b2	cg23164535	-0.00313023	0.000605886	3.57809e-07	-0.00058427	8.10482e-05	2.36471e-12	-0.00261811	0.000635839	4.54954e-05	0.876518	0.348428	0.0122259	0.163606	0.0175408
SL005200	MICB	cg26784891	0.00502956	0.00119425	3.05953e-05	-0.000313675	4.67015e-05	5.56758e-11	0.00597871	0.00124463	2.12048e-06	3.02589	1.19172	0.0114468	0.188713	0.0175467
SL004915	NCC27	cg12321669	-0.0071386	0.00266416	0.0076389	-0.00258756	0.00029402	2.79963e-17	-0.00445162	0.00286478	0.120897	1.03842	0.421071	0.0140234	1	0.0175643
SL004650	sFRP-3	cg02625481	0.00510335	0.000637964	1.05487e-14	-0.000614523	8.88216e-05	1.56294e-11	0.00562449	0.000666868	4.52899e-16	0.848042	0.335475	0.0118149	0.102117	0.0175794
SL000507	Lymphotoxin a1/b2	cg15847272	-0.00313023	0.000605886	3.57809e-07	-0.000568444	9.86951e-05	1.55411e-08	-0.00270658	0.000623628	1.75747e-05	0.745282	0.285985	0.00946116	0.135342	0.0175827
SL000507	Lymphotoxin a1/b2	cg15847272	-0.00313023	0.000605886	3.57809e-07	-0.000568444	9.86951e-05	1.55411e-08	-0.00270658	0.000623628	1.75747e-05	0.745282	0.285985	0.00946116	0.135342	0.0175827
SL007179	EPHB2	cg00323313	0.00587026	0.00053976	1.16036e-24	-0.000801953	7.45836e-05	3.38564e-24	0.00521365	0.000600835	7.17299e-17	-0.818767	0.336358	0.0153062	0.111854	0.0175902
SL000519	MIP-1a	cg15096461	0.0085858	0.00120074	3.46349e-12	-0.00020724	3.86045e-05	1.26827e-07	0.00937943	0.00123004	1.43296e-13	3.82956	1.44707	0.00841685	0.0924362	0.0176126
SL005207	NKp46	cg22545168	0.00249152	0.000718363	0.000573988	-0.00050589	0.000113035	9.66507e-06	0.0029122	0.000728639	7.5021e-05	0.831576	0.297012	0.00533328	0.168848	0.0176152
SL005200	MICB	cg24526694	0.00502956	0.00119425	3.05953e-05	-0.000703731	9.58965e-05	1.00139e-12	0.00400492	0.00125567	0.00152402	-1.45602	0.580466	0.0124771	0.203724	0.0176189
SL004118	TrATPase	cg00112685	0.00435046	0.000684778	5.11612e-10	0.000537283	0.000165811	0.00128128	0.00399253	0.000684297	1.02547e-08	0.666188	0.191075	0.000536843	0.0822742	0.0176192
SL004438	Cystatin M	cg27388792	-0.00311123	0.000973889	0.00149669	0.00012468	3.52503e-05	0.000445954	-0.00260157	0.000977304	0.00804188	-4.08769	1.27815	0.00147932	0.163811	0.0176827
SL000451	HSP 70	cg10185489	0.00621418	0.000753224	1.69622e-15	-0.000383722	5.87507e-05	1.73613e-10	0.00679595	0.00078285	6.97523e-17	1.51612	0.595518	0.0112273	0.0936195	0.0176895
SL000316	C4	cg08845025	0.00345375	0.000902977	0.000149105	-0.000439165	8.90628e-05	1.14886e-06	0.00401457	0.000920421	1.59881e-05	1.277	0.472041	0.00708152	0.162378	0.0177028
SL000316	C4	cg08845025	0.00345375	0.000902977	0.000149105	-0.000439165	8.90628e-05	1.14886e-06	0.00401457	0.000920421	1.59881e-05	1.277	0.472041	0.00708152	0.162378	0.0177028
SL003643	Glutathione S-transferase Pi	cg03078043	0.00745587	0.0014225	2.43742e-07	0.000548779	7.77394e-05	6.24123e-12	0.00628141	0.00148923	2.9746e-05	2.14012	0.850083	0.0121586	0.157521	0.0177276
SL000089	TGF-b3	cg14124894	0.0021896	0.000782384	0.00535016	0.000294788	6.34224e-05	4.39645e-06	0.00172297	0.000794998	0.0307342	1.58293	0.574175	0.00607087	0.213112	0.0177325
SL005200	MICB	cg08752994	0.00502956	0.00119425	3.05953e-05	-0.000647258	6.94493e-05	5.05463e-19	0.00375745	0.00129615	0.00392589	-1.96538	0.801761	0.0146089	0.252926	0.0177546
SL002525	C2	cg27064867	0.00222251	0.000451497	1.19681e-06	-0.000445985	8.7033e-05	4.42158e-07	0.0019345	0.000461238	3.29475e-05	-0.645783	0.241575	0.00778333	0.129587	0.0177832
SL000519	MIP-1a	cg06162375	0.0085858	0.00120074	3.46349e-12	0.000162586	5.32176e-05	0.00238167	0.00795003	0.00119593	8.54886e-11	3.91034	1.04176	0.000196895	0.0740484	0.0178136
SL000250	a2-Antiplasmin	cg06126721	-0.00316463	0.000449491	7.08532e-12	-0.0019774	0.000139152	3.35019e-38	-0.00244971	0.000537117	6.55957e-06	0.361549	0.150483	0.0166793	0.225911	0.017838
SL000522	MMP-12	cg00202702	0.0200129	0.00128758	4.6758e-44	0.000400304	5.04622e-05	1.65815e-14	0.0211905	0.00136553	6.27235e-44	-2.94155	1.18562	0.0134593	0.0588375	0.0178887
SL007696	C1QR1	cg10019507	0.00307146	0.000573058	1.32454e-07	0.000584557	0.000128023	6.39928e-06	0.0034077	0.000581763	9.00393e-09	-0.575206	0.20788	0.00588745	0.109473	0.0179619
SL000497	Laminin	cg07245641	0.00574291	0.00106975	1.26467e-07	0.000119491	3.64397e-05	0.00112055	0.00629632	0.00106985	7.69797e-09	-4.63144	1.35605	0.000693754	0.0963652	0.0180103
SL003340	YKL-40	cg17943323	0.0292871	0.0025326	2.59076e-27	-0.000282913	5.88824e-05	2.10383e-06	0.0277532	0.00257776	3.03501e-24	-5.4219	1.99593	0.00684838	0.0523754	0.0180446
SL007674	LY9	cg09248276	0.00223361	0.000754654	0.00323832	-0.00131193	0.000100049	1.40714e-33	0.00112781	0.000880468	0.20087	-0.842875	0.350628	0.0166184	1	0.0180547
SL008835	ASGR1	cg08141989	0.00378884	0.000825355	5.72401e-06	-0.0002016	5.83259e-05	0.000598606	0.00336026	0.000827515	5.76157e-05	-2.12592	0.655867	0.00127683	0.113118	0.0180602
SL002505	ANP	cg11858029	0.00396435	0.00131945	0.00280631	-0.000320457	9.75907e-05	0.00110344	0.0046473	0.00131972	0.000472522	2.13118	0.625917	0.000720535	0.172273	0.0180981
SL007696	C1QR1	cg14042504	0.00307146	0.000573058	1.32454e-07	0.000437336	7.23493e-05	3.10968e-09	0.00348505	0.000591915	7.60034e-09	-0.945706	0.368268	0.0105467	0.134656	0.0181012
SL004720	Calcineurin	cg27490875	-0.00255902	0.000743162	0.00062755	-0.000917277	0.000144018	4.65591e-10	-0.00199759	0.000770956	0.00987637	0.612061	0.240471	0.0112492	0.219393	0.0181019
SL004639	TrkC	cg26581449	0.00258377	0.000560973	5.32999e-06	-0.000528811	8.94637e-05	6.65308e-09	0.00218671	0.000578421	0.000177284	-0.750861	0.291206	0.0102363	0.153676	0.0181092
SL005191	ILT-4	cg09780768	0.00469515	0.000647034	1.72262e-12	-0.000239424	6.22594e-05	0.000137368	0.00434913	0.000651769	7.31155e-11	-1.44524	0.482476	0.00288991	0.0736983	0.0181205
SL005403	Lectin, mannose-binding 2	cg21042902	-0.00497827	0.000647563	9.35641e-14	-0.000108792	2.97074e-05	0.000279612	-0.00463726	0.000650946	4.15453e-12	3.13459	1.01352	0.00210535	0.0685012	0.0181338
SL005200	MICB	cg23895220	0.00502956	0.00119425	3.05953e-05	-0.000500176	0.000143354	0.000531837	0.00565031	0.00119794	3.1954e-06	1.24106	0.386621	0.00142141	0.12342	0.0181603
SL016969	CSRP3	cg09648702	0.00668653	0.00135806	1.1882e-06	0.000223756	4.54581e-05	1.1959e-06	0.00585135	0.00138411	2.85483e-05	3.73255	1.38655	0.00736366	0.124905	0.0181845
SL008099	CAPG	cg12367520	0.0119541	0.000940608	6.58736e-32	0.000301597	4.75289e-05	5.33233e-10	0.0126593	0.000975278	5.11868e-33	-2.33832	0.919264	0.0112972	0.0589951	0.018223
SL006922	RAD51	cg02847760	0.0023141	0.000643963	0.000361909	-0.000142884	3.92731e-05	0.000306048	0.00265198	0.000647168	4.94185e-05	2.36468	0.762348	0.00204336	0.146007	0.0182544
SL007310	RAC3	cg05222119	-0.00562849	0.00230917	0.0151709	-0.000384587	0.000105301	0.000289971	-0.00442089	0.00232096	0.0574374	3.14	1.01523	0.00210364	1	0.0182621
SL004298	granzyme A	cg07363330	0.00349307	0.00064455	9.69641e-08	-0.00043633	9.9036e-05	1.31459e-05	0.00312453	0.000653246	2.33434e-06	-0.844634	0.302199	0.0054095	0.105506	0.0182693
SL005200	MICB	cg04654261	0.00502956	0.00119425	3.05953e-05	-0.000180772	5.35615e-05	0.00080129	0.00564667	0.00119617	3.13711e-06	3.41374	1.03411	0.00103885	0.122696	0.0182773
SL010391	WFKN2	cg21698310	0.001754	0.000714473	0.014461	-0.000631196	8.2728e-05	1.37505e-13	0.00238257	0.000754286	0.00168973	0.995839	0.4013	0.0134403	0.358363	0.0182821
SL000498	Leptin	cg10323187	0.00464792	0.0017562	0.00841113	-0.000196054	3.90819e-05	7.54128e-07	0.00355446	0.00179181	0.0478844	-5.57731	2.08578	0.0077646	0.235257	0.018291
SL009045	ENPP7	cg20589078	0.00535713	0.00178297	0.00280503	-0.000311811	6.81318e-05	6.09528e-06	0.00431498	0.00181033	0.0175549	-3.34227	1.21413	0.00614379	0.194536	0.0183264
SL003785	GAPDH, liver	cg21990700	0.00744038	0.00266461	0.00545254	-0.0019165	0.000121233	3.08812e-45	0.00276975	0.00329592	0.401147	-2.43706	1.0218	0.017483	1	0.0183554
SL005491	OBCAM	cg02516944	-0.00365208	0.000707847	3.70258e-07	0.000200362	5.388e-05	0.000225214	-0.00327947	0.000712045	5.3431e-06	-1.8597	0.609692	0.00242016	0.102028	0.0183558
SL010471	Testican-2	cg09796583	-0.0018078	0.000591953	0.00239149	-0.000706232	0.000102828	2.15595e-11	-0.00133095	0.0006184	0.0319063	0.675205	0.268905	0.0123887	0.263774	0.0183597
SL000064	Kallikrein 7	cg26524263	-0.0039735	0.000825654	2.02678e-06	0.000433262	6.48088e-05	6.72319e-11	-0.00332728	0.000859991	0.000125182	-1.49151	0.591847	0.0120722	0.162631	0.0183684
SL000678	Granulysin	cg19049837	0.00543645	0.00107012	5.49814e-07	-0.000214951	4.31485e-05	8.95034e-07	0.00477416	0.00109141	1.5103e-05	-3.08115	1.15114	0.00770471	0.121825	0.0183825
SL014983	H2B2E	cg12380743	0.00458629	0.00119316	0.000138323	0.000864699	0.000146402	6.84597e-09	0.00374288	0.00123041	0.00248611	0.975386	0.379325	0.0104461	0.183899	0.0183918
SL004594	Troponin I, skeletal, fast twitch	cg18493030	0.00700017	0.00153944	6.9748e-06	-0.000221463	4.5462e-05	1.53129e-06	0.00606062	0.00156826	0.000127478	-4.24249	1.57497	0.00732759	0.134219	0.0184082
SL000616	Vitronectin	cg16565409	-0.00219761	0.000789008	0.00557036	-0.00160859	0.00016625	2.87168e-20	-0.00306083	0.000861452	0.000420383	-0.536629	0.220822	0.0154779	0.392798	0.0184263
SL005200	MICB	cg15039036	0.00502956	0.00119425	3.05953e-05	-0.000147811	4.73828e-05	0.00192661	0.00564931	0.00119145	2.84366e-06	4.19284	1.16642	0.000360427	0.123221	0.0184715
SL001896	Clusterin	cg18407864	0.00200442	0.000688019	0.00375147	-0.000438477	5.93679e-05	7.24874e-13	0.00259184	0.000723836	0.000379468	1.3397	0.539069	0.0133047	0.293068	0.0185005
SL000414	Factor B	cg17983217	0.00161112	0.000502062	0.00142606	0.00023711	6.09762e-05	0.000115865	0.0013426	0.000506043	0.00825432	1.13248	0.382756	0.0032503	0.166668	0.0185406
SL007674	LY9	cg03742629	0.00223361	0.000754654	0.00323832	-0.000308991	6.61516e-05	3.94604e-06	0.00178778	0.000767055	0.0202031	-1.44285	0.529356	0.00666358	0.1996	0.0185642
SL002706	CD23	cg11445324	0.00419297	0.00104102	6.59734e-05	-0.000325488	9.75799e-05	0.000920843	0.00472802	0.00104223	7.33225e-06	1.64384	0.494711	0.000963114	0.127607	0.0185675
SL000678	Granulysin	cg08755026	0.00543645	0.00107012	5.49814e-07	-0.000113201	3.80424e-05	0.00307832	0.00487238	0.00106449	6.08125e-06	-4.98297	1.29504	0.000136162	0.103758	0.0185785
SL000507	Lymphotoxin a1/b2	cg25375757	-0.00313023	0.000605886	3.57809e-07	-0.000591569	8.13113e-05	1.52391e-12	-0.00261914	0.000636541	4.60531e-05	0.863958	0.347355	0.0132316	0.163276	0.018597
SL000507	Lymphotoxin a1/b2	cg25375757	-0.00313023	0.000605886	3.57809e-07	-0.000591569	8.13113e-05	1.52391e-12	-0.00261914	0.000636541	4.60531e-05	0.863958	0.347355	0.0132316	0.163276	0.018597
SL000458	IFN-g R1	cg11453076	0.00197595	0.000646972	0.00239028	-0.000357033	9.63999e-05	0.000238793	0.00231627	0.000650779	0.000411425	0.953166	0.312821	0.00244703	0.172226	0.0186211
SL004915	NCC27	cg14119792	-0.0071386	0.00266416	0.0076389	-0.000990384	0.000126944	4.17024e-14	-0.00475522	0.00282004	0.0924353	2.40652	0.975248	0.0139677	1	0.0186366
SL005184	IL-23	cg18029596	0.00631786	0.0010959	1.50269e-08	-0.000246084	6.60376e-05	0.000218492	0.0057444	0.00110257	2.86323e-07	-2.33034	0.768595	0.00256789	0.0907681	0.0186811
SL004843	Ephrin-A2	cg08902698	0.00445075	0.000487123	2.14635e-18	-0.00053525	9.58509e-05	4.04866e-08	0.0047796	0.000500433	8.1306e-20	0.614378	0.237026	0.00984956	0.0738855	0.0187184
SL014983	H2B2E	cg01566242	0.00458629	0.00119316	0.000138323	-0.000107543	3.03055e-05	0.00042738	0.00397003	0.00119795	0.000993125	-5.73034	1.82609	0.00181126	0.13437	0.0187352
SL007237	MP2K4	cg07037251	0.00214826	0.000890253	0.0162106	0.00105586	0.00013952	2.11111e-13	0.00137322	0.000939149	0.144376	0.734036	0.296826	0.0137639	1	0.0187417
SL014983	H2B2E	cg13178372	0.00458629	0.00119316	0.000138323	-0.000419886	0.0001009	3.7816e-05	0.00524332	0.00120623	1.70527e-05	1.56477	0.549495	0.0046037	0.143258	0.0187689
SL000316	C4	cg07148697	0.00345375	0.000902977	0.000149105	-0.000426151	7.34304e-05	1.21895e-08	0.00408123	0.00093009	1.42398e-05	1.47244	0.572976	0.0104936	0.181681	0.0187863
SL000316	C4	cg07148697	0.00345375	0.000902977	0.000149105	-0.000426151	7.34304e-05	1.21895e-08	0.00408123	0.00093009	1.42398e-05	1.47244	0.572976	0.0104936	0.181681	0.0187863
SL004712	SDF-1	cg07368796	0.00347207	0.000760694	6.44543e-06	-0.000421509	7.33953e-05	1.69665e-08	0.00399454	0.00078281	4.91612e-07	1.23953	0.481344	0.0103332	0.150479	0.0187867
SL008158	H31	cg26077005	0.00770477	0.00115235	6.71583e-11	0.000785314	0.000224222	0.000506521	0.00711188	0.00115635	1.69504e-09	0.754979	0.238322	0.00163886	0.0769518	0.0188026
SL004146	IL-1 R4	cg20060108	0.0042602	0.00113063	0.000186101	-0.000653108	0.00017041	0.000144566	0.0048577	0.00113893	2.43e-05	0.914863	0.307732	0.00310603	0.140253	0.0188216
SL000316	C4	cg00978102	0.00345375	0.000902977	0.000149105	-0.000242659	6.63631e-05	0.00028551	0.00392385	0.000907812	1.89881e-05	1.93729	0.632084	0.00230706	0.136113	0.018829
SL000316	C4	cg00978102	0.00345375	0.000902977	0.000149105	-0.000242659	6.63631e-05	0.00028551	0.00392385	0.000907812	1.89881e-05	1.93729	0.632084	0.00230706	0.136113	0.018829
SL000408	Epo	cg04778012	0.00454535	0.00115058	9.03419e-05	0.00126537	0.000167072	2.03261e-13	0.00554768	0.00121403	6.3021e-06	-0.792122	0.320712	0.0138816	0.220517	0.0188656
SL003327	Factor D	cg03643797	0.00826188	0.00065121	8.62886e-32	-0.00078497	0.000127585	1.67321e-09	0.00873621	0.000673731	6.21863e-33	0.604267	0.237863	0.0114047	0.057412	0.0188691
SL001766	HCG	cg25760776	0.0280648	0.00244188	4.90565e-27	0.000303335	8.60429e-05	0.000465397	0.0293185	0.00245109	7.09402e-29	-4.13286	1.3134	0.00175922	0.0446695	0.0188969
SL010390	URB	cg26395331	0.0106825	0.000686709	4.26099e-44	-0.000309167	6.5306e-05	2.93917e-06	0.0110907	0.000698543	1.66108e-45	1.32049	0.488523	0.00712762	0.0382171	0.0189073
SL000316	C4	cg24487856	0.00345375	0.000902977	0.000149105	-0.000243286	7.89905e-05	0.00219578	0.00298748	0.000900417	0.00097994	-1.91655	0.528911	0.000323393	0.135004	0.0189374
SL000316	C4	cg24487856	0.00345375	0.000902977	0.000149105	-0.000243286	7.89905e-05	0.00219578	0.00298748	0.000900417	0.00097994	-1.91655	0.528911	0.000323393	0.135004	0.0189374
SL004139	Ephrin-A3	cg21199495	-0.00165059	0.000598347	0.00603867	-0.000436469	8.23438e-05	1.80189e-07	-0.00203682	0.000612588	0.000955879	-0.884906	0.338121	0.0091626	0.233998	0.0189419
SL009045	ENPP7	cg12848405	0.00535713	0.00178297	0.00280503	-0.00039126	5.32236e-05	9.10551e-13	0.00384905	0.00187475	0.0406317	-3.85441	1.55664	0.0136434	0.281508	0.018947
SL010520	AURKB	cg06835483	0.00265883	0.000680681	0.000108051	-0.000518681	8.74101e-05	5.87654e-09	0.00217748	0.000702323	0.0020531	-0.928016	0.363268	0.010956	0.181036	0.0189547
SL000248	a1-Antichymotrypsin	cg16244889	0.00132386	0.000356623	0.000230811	-0.000557932	7.99523e-05	1.05533e-11	0.00161226	0.000373023	1.89863e-05	0.516907	0.207472	0.0130766	0.217847	0.0189562
SL012783	WFKN1	cg26648579	-0.00230958	0.000844852	0.00650562	-0.00028084	5.5181e-05	5.25615e-07	-0.00178137	0.000862831	0.039529	1.88081	0.711552	0.00849409	0.228703	0.0189887
SL000316	C4	cg13511576	0.00345375	0.000902977	0.000149105	-0.000266738	4.4441e-05	3.98319e-09	0.00409738	0.00093243	1.38492e-05	2.41294	0.946848	0.0111502	0.186355	0.0189905
SL000316	C4	cg13511576	0.00345375	0.000902977	0.000149105	-0.000266738	4.4441e-05	3.98319e-09	0.00409738	0.00093243	1.38492e-05	2.41294	0.946848	0.0111502	0.186355	0.0189905
SL000316	C4	cg03787837	0.00345375	0.000902977	0.000149105	-0.00206429	0.00047842	1.96097e-05	0.00294706	0.000914447	0.00136093	-0.245456	0.0878285	0.00541448	0.146708	0.0189927
SL000316	C4	cg03787837	0.00345375	0.000902977	0.000149105	-0.00206429	0.00047842	1.96097e-05	0.00294706	0.000914447	0.00136093	-0.245456	0.0878285	0.00541448	0.146708	0.0189927
SL010617	TPSB2	cg05933904	0.00540033	0.00163415	0.00102565	0.00163974	0.000151024	1.37607e-24	0.0073836	0.00182335	6.03158e-05	-1.2095	0.503539	0.0167047	0.36725	0.0190121
SL003201	VEGF sR2	cg25054580	-0.00271309	0.00048045	2.86954e-08	0.000718986	7.35553e-05	1.27151e-20	-0.00324029	0.000525428	1.53318e-09	0.733245	0.303615	0.0161245	0.194314	0.0190499
SL005195	LAG-3	cg22210060	0.00746282	0.00113219	1.20059e-10	-0.000144223	3.66345e-05	9.54082e-05	0.0068599	0.00114185	3.84535e-09	-4.18046	1.43238	0.00369034	0.0807898	0.0190509
SL003332	MMP-17	cg13031551	0.00214594	0.000896659	0.0171028	-0.000273966	6.09485e-05	8.83113e-06	0.00163098	0.000909798	0.0736877	-1.87965	0.684045	0.00623716	1	0.0190535
SL000323	C7	cg11590974	0.00500134	0.00067651	6.93323e-13	-0.000447729	9.12622e-05	1.29597e-06	0.00541328	0.000689524	2.99255e-14	0.920059	0.344831	0.00789952	0.0823653	0.0190821
SL000316	C4	cg12259379	0.00345375	0.000902977	0.000149105	-0.000480186	0.000164211	0.00362584	0.00297619	0.000897378	0.000984574	-0.994545	0.253819	0.000102897	0.138275	0.0191023
SL000316	C4	cg12259379	0.00345375	0.000902977	0.000149105	-0.000480186	0.000164211	0.00362584	0.00297619	0.000897378	0.000984574	-0.994545	0.253819	0.000102897	0.138275	0.0191023
SL005629	NAGK	cg01726273	0.00332206	0.00115846	0.00432671	-0.00115187	0.000243117	2.88717e-06	0.00263445	0.00117852	0.0258746	-0.596945	0.221385	0.00726861	0.206981	0.0191052
SL010450	CD48	cg07379893	0.00545014	0.000606665	6.90733e-18	-0.000428176	6.99116e-05	1.96238e-09	0.00501209	0.000627357	1.11993e-14	-1.02307	0.403532	0.0115685	0.0803748	0.0191542
SL000316	C4	cg26953232	0.00345375	0.000902977	0.000149105	-0.000502523	0.000141894	0.000438816	0.00391748	0.00090666	1.91153e-05	0.922799	0.295509	0.00190625	0.134268	0.0191675
SL000316	C4	cg26953232	0.00345375	0.000902977	0.000149105	-0.000502523	0.000141894	0.000438816	0.00391748	0.00090666	1.91153e-05	0.922799	0.295509	0.00190625	0.134268	0.0191675
SL016969	CSRP3	cg16526416	0.00668653	0.00135806	1.1882e-06	0.000804786	0.000101442	1.6496e-14	0.00545913	0.00144052	0.000171025	1.52513	0.622169	0.0146071	0.183564	0.0191775
SL002505	ANP	cg08425760	0.00396435	0.00131945	0.00280631	-0.00039425	8.54362e-05	5.1272e-06	0.00473342	0.00134057	0.000456346	1.95072	0.718214	0.00685787	0.193996	0.0192471
SL004650	sFRP-3	cg04037038	0.00510335	0.000637964	1.05487e-14	0.00113266	0.000123537	1.68572e-18	0.00576497	0.000690945	8.82034e-16	-0.584134	0.241343	0.0158989	0.129645	0.0192744
SL007328	JAG1	cg22537474	0.00361759	0.000478219	2.16359e-13	0.000544948	0.000101941	1.42618e-07	0.00330799	0.000489885	4.44545e-11	0.568129	0.218306	0.00955815	0.0855822	0.019289
SL000428	FSH	cg03472798	0.0363179	0.00193302	8.39055e-59	0.000294284	7.10539e-05	4.10558e-05	0.0373707	0.00195393	2.46949e-60	-3.57732	1.26155	0.00477607	0.028987	0.0192941
SL000316	C4	cg17096289	0.00345375	0.000902977	0.000149105	-0.00130961	0.000365894	0.000381666	0.00391733	0.00090713	1.93167e-05	0.353979	0.114625	0.00213755	0.134223	0.0193796
SL000316	C4	cg17096289	0.00345375	0.000902977	0.000149105	-0.00130961	0.000365894	0.000381666	0.00391733	0.00090713	1.93167e-05	0.353979	0.114625	0.00213755	0.134223	0.0193796
SL003190	MIP-5	cg22359664	0.00636376	0.000879492	1.97545e-12	0.000354653	7.50315e-05	3.04494e-06	0.00584371	0.000894685	1.74425e-10	1.46636	0.545202	0.00741754	0.0817201	0.0194068
SL007310	RAC3	cg10965164	-0.00562849	0.00230917	0.0151709	-0.000238724	5.53686e-05	1.98646e-05	-0.00434382	0.00233843	0.0638722	5.38141	1.93459	0.00563147	1	0.019417
SL004672	BCMA	cg04868518	0.00393033	0.000664403	6.48892e-09	0.000112397	3.31958e-05	0.000770753	0.00359386	0.000665847	1.08915e-07	2.99355	0.926731	0.00132636	0.0856074	0.0194286
SL001720	VCAM-1	cg17222434	0.00661587	0.000716113	9.53097e-19	-0.000738328	0.000138813	1.63952e-07	0.0061547	0.000733368	6.07024e-16	-0.62461	0.24007	0.00957637	0.0697062	0.0194314
SL002525	C2	cg01835021	0.00222251	0.000451497	1.19681e-06	-0.00072892	9.56579e-05	1.48578e-13	0.00261634	0.000476814	6.8019e-08	0.540293	0.22006	0.0144544	0.177201	0.0194445
SL005213	RELT	cg07782744	0.0071169	0.000635777	7.27348e-26	-0.000225577	5.6514e-05	7.64914e-05	0.00745671	0.000641668	1.62656e-27	1.50638	0.522654	0.00413642	0.047746	0.0194559
SL009324	FSTL3	cg22207963	0.0103106	0.000561419	7.99793e-57	-0.000555372	0.000119336	4.27417e-06	0.00998265	0.000570649	8.39819e-53	-0.590503	0.218567	0.00715576	0.031807	0.0194643
SL000519	MIP-1a	cg20938699	0.0085858	0.00120074	3.46349e-12	0.00030825	8.1037e-05	0.000161885	0.00921374	0.00120939	1.50198e-13	-2.03711	0.688046	0.0032297	0.073137	0.0194707
SL002823	sL-Selectin	cg27233027	-0.00381713	0.00057374	8.20979e-11	-0.000864405	0.000108116	1.06463e-14	-0.0032963	0.000609175	1.01284e-07	0.602527	0.246631	0.0149422	0.136445	0.019471
SL000573	SAP	cg08246428	0.00254901	0.000644087	8.78015e-05	-0.000561792	8.41198e-05	7.04314e-11	0.00304853	0.000671023	7.11015e-06	0.889162	0.356527	0.0129868	0.195968	0.0194722
SL004594	Troponin I, skeletal, fast twitch	cg11590282	0.00700017	0.00153944	6.9748e-06	-0.000789267	0.00011584	3.02545e-11	0.00821464	0.00160679	4.69273e-07	1.53872	0.618821	0.013257	0.17349	0.0194993
SL000017	vWF	cg10124440	0.00683016	0.00172313	8.55537e-05	-0.000403225	6.19808e-05	2.03089e-10	0.00552673	0.00179073	0.00214978	-3.2325	1.29166	0.0126767	0.190834	0.019505
SL000678	Granulysin	cg22235080	0.00543645	0.00107012	5.49814e-07	-0.000225856	4.41818e-05	4.69246e-07	0.00476955	0.00109321	1.58808e-05	-2.95278	1.12455	0.0089359	0.122672	0.0195094
SL005789	Stanniocalcin-1	cg03971254	0.0071348	0.000690715	1.2619e-22	-0.000330138	7.09495e-05	4.28588e-06	0.00673209	0.00070205	5.78473e-20	-1.21981	0.451809	0.00719455	0.0564428	0.0195315
SL000316	C4	cg04344233	0.00345375	0.000902977	0.000149105	-0.000289656	6.80071e-05	2.49416e-05	0.00395342	0.000914002	1.87359e-05	1.72502	0.617871	0.00546151	0.144672	0.019546
SL000316	C4	cg04344233	0.00345375	0.000902977	0.000149105	-0.000289656	6.80071e-05	2.49416e-05	0.00395342	0.000914002	1.87359e-05	1.72502	0.617871	0.00546151	0.144672	0.019546
SL003733	SMAC	cg22805813	0.00300745	0.000865624	0.000561319	-0.000537728	0.000132571	5.87189e-05	0.0034743	0.000874309	8.22981e-05	0.868191	0.30406	0.00449662	0.155231	0.0195519
SL000507	Lymphotoxin a1/b2	cg02683578	-0.00313023	0.000605886	3.57809e-07	0.00019804	4.32486e-05	6.03558e-06	-0.00277971	0.0006154	8.01005e-06	-1.76995	0.652223	0.00690635	0.111979	0.0195669
SL000507	Lymphotoxin a1/b2	cg02683578	-0.00313023	0.000605886	3.57809e-07	0.00019804	4.32486e-05	6.03558e-06	-0.00277971	0.0006154	8.01005e-06	-1.76995	0.652223	0.00690635	0.111979	0.0195669
SL002706	CD23	cg12261095	0.00419297	0.00104102	6.59734e-05	-0.000282055	9.76525e-05	0.00405733	0.00364293	0.00103393	0.000469228	-1.95013	0.491875	8.53533e-05	0.131183	0.0195678
SL008591	TFF1	cg15236484	0.013346	0.00177516	2.951e-13	-0.000793187	0.000125828	6.84113e-10	0.0146522	0.00183992	1.33896e-14	1.6468	0.655422	0.0123287	0.0978736	0.0195955
SL008822	EMR2	cg16572540	0.00443812	0.000772457	1.67797e-08	-0.000518317	0.000104039	8.95025e-07	0.00491104	0.000788053	1.05162e-09	0.91241	0.345437	0.00854269	0.106558	0.0196153
SL000613	uPA	cg03701779	0.00429512	0.000680225	6.44864e-10	-0.000238075	4.69848e-05	5.88021e-07	0.00387351	0.000694625	4.2172e-08	-1.77091	0.673622	0.00885519	0.0981599	0.0196192
SL005797	PIGR	cg17877600	-0.00549963	0.000986487	4.25475e-08	-0.000801028	9.18581e-05	5.2762e-17	-0.00647201	0.00106024	2.22098e-09	-1.21391	0.50134	0.0158559	0.176807	0.0196451
SL003733	SMAC	cg05290737	0.00300745	0.000865624	0.000561319	0.000433591	9.58518e-05	7.77324e-06	0.00350437	0.00087873	7.76729e-05	-1.14607	0.420876	0.00671769	0.165232	0.0196495
SL004140	Ephrin-A4	cg02097120	0.00573248	0.000490466	8.59509e-28	-0.000464235	6.93365e-05	6.32565e-11	0.00535242	0.000511064	3.81465e-23	-0.818686	0.32903	0.013196	0.0662998	0.0196833
SL005171	IGFBP-4	cg19572487	0.00333642	0.000643607	3.26812e-07	-0.000687369	0.000121293	2.57594e-08	0.00290247	0.000661832	1.43839e-05	-0.631327	0.246722	0.0108234	0.130066	0.0196934
SL005491	OBCAM	cg04621578	-0.00365208	0.000707847	3.70258e-07	0.000162833	3.10207e-05	2.34648e-07	-0.00320208	0.000724348	1.23196e-05	-2.76357	1.06188	0.00955574	0.123217	0.0197173
SL001902	BCAM	cg11360366	0.00311676	0.000633306	1.20506e-06	0.000195642	4.69943e-05	3.75906e-05	0.00346277	0.000640433	1.04053e-07	-1.76858	0.628385	0.0050988	0.111016	0.0197196
SL002706	CD23	cg14156381	0.00419297	0.00104102	6.59734e-05	-0.000471419	9.81138e-05	2.10686e-06	0.00481387	0.00106001	7.1717e-06	1.31707	0.494114	0.00796095	0.148079	0.0197601
SL000248	a1-Antichymotrypsin	cg23660866	0.00132386	0.000356623	0.000230811	-0.000248211	5.18127e-05	2.25171e-06	0.00153565	0.000363046	2.8269e-05	0.853264	0.319836	0.00790645	0.159979	0.0197656
SL000250	a2-Antiplasmin	cg11516377	-0.00316463	0.000449491	7.08532e-12	0.000555757	0.000113039	1.2315e-06	-0.00343679	0.000458242	3.37479e-13	0.489711	0.184998	0.00839992	0.0860006	0.0197665
SL005797	PIGR	cg17940251	-0.00549963	0.000986487	4.25475e-08	0.000323052	4.91216e-05	1.32701e-10	-0.00474514	0.00102653	4.95196e-06	-2.33553	0.937159	0.0130539	0.137191	0.0197833
SL000507	Lymphotoxin a1/b2	cg12496694	-0.00313023	0.000605886	3.57809e-07	-0.000429636	8.08608e-05	1.68907e-07	-0.00274133	0.000620508	1.24778e-05	0.905192	0.349086	0.0098204	0.124241	0.0197886
SL000507	Lymphotoxin a1/b2	cg12496694	-0.00313023	0.000605886	3.57809e-07	-0.000429636	8.08608e-05	1.68907e-07	-0.00274133	0.000620508	1.24778e-05	0.905192	0.349086	0.0098204	0.124241	0.0197886
SL008909	LGMN	cg01725130	-0.00252588	0.000652853	0.000125209	-0.000356669	9.44588e-05	0.000180504	-0.00218711	0.000657411	0.000949523	0.94982	0.320942	0.00324247	0.13412	0.0198442
SL010519	ZAP70	cg20535646	0.00425238	0.000835343	5.23873e-07	-0.000289184	4.50795e-05	3.54368e-10	0.00487729	0.000867384	3.28775e-08	2.16093	0.864696	0.0128053	0.146954	0.0198802
SL000437	Haptoglobin, Mixed Type	cg09488090	0.00449151	0.00147632	0.00248235	-0.000511222	0.000161303	0.00163051	0.00374902	0.00147516	0.0113699	-1.45239	0.423172	0.000653407	0.16531	0.0198894
SL007306	FAM3B	cg10270055	0.00422573	0.000742908	2.29887e-08	-0.000638483	7.22923e-05	2.23095e-17	0.0049635	0.000799721	1.22025e-09	1.1555	0.478712	0.0161826	0.174589	0.0198922
SL000316	C4	cg06636203	0.00345375	0.000902977	0.000149105	-0.000509552	9.14421e-05	4.309e-08	0.00405453	0.000927624	1.53546e-05	1.17902	0.460135	0.0107183	0.173948	0.019911
SL000316	C4	cg06636203	0.00345375	0.000902977	0.000149105	-0.000509552	9.14421e-05	4.309e-08	0.00405453	0.000927624	1.53546e-05	1.17902	0.460135	0.0107183	0.173948	0.019911
SL004821	S100A4	cg00998782	0.00224545	0.000907372	0.0136977	-0.00034175	5.65494e-05	3.13453e-09	0.00288858	0.000937452	0.00218567	1.88187	0.746221	0.0120131	0.286414	0.0199463
SL006114	ROR1	cg18163452	0.00556538	0.000598236	5.65094e-19	0.000472739	0.000140684	0.000843709	0.00526539	0.000599439	3.19969e-17	0.634595	0.196689	0.00134365	0.0539043	0.0199491
SL005430	SECTM1	cg09334629	0.00491231	0.000644944	1.52655e-13	-0.000545175	7.00976e-05	5.0203e-14	0.00434187	0.000682863	4.98626e-10	-1.04634	0.42948	0.0152227	0.116124	0.0200774
SL002517	TNF-a	cg22024120	0.00209346	0.00076135	0.00620318	-0.000894851	0.000124969	3.24879e-12	0.00146868	0.00079869	0.0665886	-0.698192	0.284043	0.0143418	1	0.020078
SL000316	C4	cg21550612	0.00345375	0.000902977	0.000149105	-0.000792047	8.95948e-05	2.10571e-17	0.00435066	0.000972333	9.69593e-06	1.13239	0.47001	0.0163803	0.259691	0.0200977
SL000316	C4	cg21550612	0.00345375	0.000902977	0.000149105	-0.000792047	8.95948e-05	2.10571e-17	0.00435066	0.000972333	9.69593e-06	1.13239	0.47001	0.0163803	0.259691	0.0200977
SL000519	MIP-1a	cg24210523	0.0085858	0.00120074	3.46349e-12	-0.000294799	6.08384e-05	1.73301e-06	0.00930273	0.00122323	1.64701e-13	2.43196	0.918216	0.00836439	0.0835028	0.0201226
SL007674	LY9	cg19639427	0.00223361	0.000754654	0.00323832	-0.000466244	6.38684e-05	1.28135e-12	0.00160609	0.000793028	0.0434211	-1.3459	0.549121	0.0146195	0.280943	0.0201505
SL005200	MICB	cg11498582	0.00502956	0.00119425	3.05953e-05	-0.000224684	7.84657e-05	0.00438401	0.00440261	0.00118585	0.000230608	-2.79036	0.702205	8.22889e-05	0.124653	0.0201719
SL006970	DLL1	cg00061811	0.00524835	0.000689281	1.54097e-13	-0.000309453	7.94574e-05	0.000113089	0.00560924	0.000695054	6.30773e-15	1.16621	0.402992	0.00398804	0.0687616	0.0201888
SL002706	CD23	cg13393785	0.00419297	0.00104102	6.59734e-05	-0.00072145	6.49275e-05	1.52628e-25	0.00547452	0.00116785	3.65908e-06	1.77634	0.747857	0.0179517	0.305641	0.0201916
SL004915	NCC27	cg05032934	-0.0071386	0.00266416	0.0076389	-0.000879622	8.82514e-05	2.61323e-21	-0.00419017	0.00292396	0.152528	3.35193	1.40342	0.0173266	1	0.0201977
SL003739	DcR3	cg06235575	0.00269907	0.00097099	0.00566673	0.000500383	0.00014487	0.000604117	0.00318826	0.000974218	0.00114699	-0.977635	0.311543	0.00181176	0.181245	0.0201993
SL003310	VEGF	cg18204145	0.00424927	0.00160975	0.00858136	-0.000565188	8.74808e-05	2.67331e-10	0.0030452	0.00167218	0.0692471	-2.13039	0.855918	0.0131654	1	0.0202
SL000428	FSH	cg05394210	0.0363179	0.00193302	8.39055e-59	-0.000398531	8.01062e-05	9.24566e-07	0.0374904	0.00197192	8.2932e-60	2.94197	1.12037	0.00893202	0.0322835	0.0202185
SL000678	Granulysin	cg12570263	0.00543645	0.00107012	5.49814e-07	-0.000229022	5.4492e-05	3.17005e-05	0.00485545	0.0010826	9.23477e-06	-2.53689	0.910931	0.0055761	0.106872	0.0202584
SL006970	DLL1	cg14040634	0.00524835	0.000689281	1.54097e-13	-0.000300649	8.875e-05	0.000766207	0.00490341	0.000691002	4.95171e-12	-1.14734	0.360107	0.00154116	0.0657248	0.0202931
SL005191	ILT-4	cg25235766	0.00469515	0.000647034	1.72262e-12	0.000675493	7.57997e-05	1.21271e-17	0.00404948	0.000697472	1.20235e-08	0.955864	0.397662	0.0166286	0.13752	0.0202992
SL003167	BLC	cg14832661	0.00409758	0.00109653	0.000209979	-0.000347634	4.94911e-05	7.87311e-12	0.00321594	0.001148	0.00530591	-2.53611	1.03186	0.0143513	0.215161	0.0203475
SL005200	MICB	cg01372898	0.00502956	0.00119425	3.05953e-05	-0.000555724	0.000120447	5.14721e-06	0.00571783	0.00121364	3.27676e-06	1.23851	0.461696	0.00757371	0.136844	0.0203928
SL001729	G-CSF	cg24724583	0.0020619	0.000708174	0.00377332	0.00049293	0.000130382	0.000177308	0.00169615	0.000713279	0.0178229	0.741992	0.252803	0.00350434	0.177385	0.0204268
SL006544	BGH3	cg25011337	0.00649287	0.000525424	1.8573e-30	0.000446377	7.82361e-05	2.08988e-08	0.00613879	0.000540641	1.77123e-26	0.793237	0.312641	0.0115068	0.0545341	0.020432
SL008382	CYTD	cg00681003	0.015403	0.00139179	2.19938e-25	-0.00144523	0.000319195	7.61556e-06	0.0146129	0.00141298	1.16108e-22	-0.546677	0.202578	0.00722173	0.0512936	0.0204443
SL000002	VEGF	cg13397365	0.00476194	0.00054054	2.61439e-17	-9.95327e-05	3.09617e-05	0.00139806	0.00503056	0.000540625	5.59934e-19	2.69876	0.806852	0.000891246	0.0564086	0.0204619
SL000427	Fractalkine/CX3CL-1	ch.16.55305377R	0.00815774	0.000908526	7.20788e-18	-0.000397846	4.4391e-05	8.20484e-18	0.00724761	0.000980201	6.90184e-13	-2.28766	0.95347	0.0168277	0.111567	0.0204664
SL008810	NEGR1	cg17218713	0.00519001	0.000536164	2.77683e-20	0.00059927	8.34703e-05	2.8544e-12	0.0047515	0.000562527	4.04339e-16	0.731743	0.298846	0.0147184	0.0844914	0.0204771
SL014028	ENTP5	cg13173405	0.00206414	0.000598382	0.000613612	0.000141266	4.40968e-05	0.00145239	0.00236179	0.000598381	9.16393e-05	-2.10698	0.627754	0.00085579	0.144197	0.0204824
SL003066	PEDF	cg17142404	0.00245857	0.000440429	4.08245e-08	-0.000238518	5.25848e-05	7.34365e-06	0.00270904	0.000447193	2.89306e-09	1.05009	0.389555	0.00728625	0.101874	0.020488
SL012783	WFKN1	cg03515656	-0.00230958	0.000844852	0.00650562	-0.000574389	7.67937e-05	3.8475e-13	-0.00159302	0.000890273	0.0742208	1.24752	0.511873	0.0151839	1	0.0204895
SL016928	SLAF7	cg02861293	0.00621455	0.00127983	1.6553e-06	-0.000255805	5.26481e-05	1.63147e-06	0.00544845	0.00130427	3.54155e-05	-2.99483	1.13596	0.00866826	0.123274	0.0204901
SL010390	URB	cg24572745	0.0106825	0.000686709	4.26099e-44	-0.000506363	8.63963e-05	8.82234e-09	0.0111547	0.000707907	5.6673e-45	0.932536	0.369645	0.0119821	0.0442035	0.020491
SL000440	Hemopexin	cg15337538	0.00569168	0.00179685	0.00163982	-0.000216947	6.25657e-05	0.000574887	0.00658964	0.00180325	0.000287783	4.13906	1.32941	0.0019652	0.157767	0.0205235
SL011888	SMOC1	cg20576094	0.00766922	0.000570717	6.61513e-35	-0.000431518	8.45609e-05	4.91875e-07	0.0073166	0.000583146	3.29159e-31	-0.817146	0.314425	0.00965774	0.0459777	0.0205673
SL002508	IL-18 BPa	cg02845204	0.00794411	0.0006274	1.04782e-31	-0.000593011	0.000104542	2.50091e-08	0.00836395	0.000645285	6.25047e-33	0.707983	0.279079	0.0115177	0.0528494	0.0205686
SL004843	Ephrin-A2	cg00733683	0.00445075	0.000487123	2.14635e-18	-0.00113528	0.00015069	2.68888e-13	0.00403386	0.000513899	3.04252e-14	-0.367216	0.150899	0.0153382	0.0936677	0.0205737
SL008835	ASGR1	cg03404566	0.00378884	0.000825355	5.72401e-06	0.000813523	0.000221784	0.000273208	0.00336929	0.000830273	5.82394e-05	0.515721	0.17278	0.00299011	0.110733	0.0206031
SL003770	SARP-2	cg04319844	0.00545376	0.000824221	1.02695e-10	-0.000280866	5.95487e-05	3.18935e-06	0.00497424	0.000838471	5.89666e-09	-1.70729	0.642516	0.00815533	0.0879246	0.0206085
SL008835	ASGR1	cg03760483	0.00378884	0.000825355	5.72401e-06	0.000821837	0.000215979	0.000161032	0.00336331	0.000831537	6.15384e-05	0.517777	0.177501	0.00370849	0.112311	0.0206097
SL005102	SHBG	cg08883146	0.00429326	0.00120378	0.000399889	-0.000809105	0.00011897	3.25751e-11	0.00335659	0.00125618	0.00780814	-1.15767	0.47021	0.0141837	0.218173	0.020613
SL001766	HCG	cg27565645	0.0280648	0.00244188	4.90565e-27	0.000420247	0.000130156	0.00133243	0.0268552	0.00244295	4.21731e-25	2.8785	0.867222	0.000974891	0.0431031	0.020645
SL004016	CXCL16, soluble	cg08742106	0.00374449	0.00051959	2.40083e-12	-0.000239215	4.20497e-05	2.2923e-08	0.00409342	0.000534579	1.15439e-13	1.45865	0.575868	0.0116461	0.093185	0.0206702
SL004269	ghrelin	cg04523929	-0.00437141	0.0011237	0.000115087	0.00025553	5.62833e-05	7.20548e-06	-0.00500936	0.00114106	1.41012e-05	2.49656	0.928633	0.00744255	0.145936	0.0207079
SL012783	WFKN1	cg05986538	-0.00230958	0.000844852	0.00650562	-0.000380344	7.49788e-05	5.71357e-07	-0.00179184	0.000862896	0.0384035	1.36124	0.523802	0.00965891	0.224171	0.0207274
SL000507	Lymphotoxin a1/b2	cg19109439	-0.00313023	0.000605886	3.57809e-07	-0.0002813	5.43915e-05	3.48197e-07	-0.00275286	0.000619583	1.11553e-05	1.34152	0.51899	0.0100524	0.120557	0.0207688
SL000507	Lymphotoxin a1/b2	cg19109439	-0.00313023	0.000605886	3.57809e-07	-0.0002813	5.43915e-05	3.48197e-07	-0.00275286	0.000619583	1.11553e-05	1.34152	0.51899	0.0100524	0.120557	0.0207688
SL003679	IGF-II receptor	cg18616418	0.00178881	0.000503556	0.000421658	0.000160281	5.04765e-05	0.00159818	0.00153879	0.000503397	0.00236908	1.55988	0.462441	0.000806775	0.139769	0.0207733
SL000382	CK-MM	cg14001023	-0.00766185	0.00165003	4.4849e-06	0.000820983	0.000110708	5.92407e-13	-0.00627693	0.00173717	0.00033595	-1.68691	0.693476	0.0153769	0.180756	0.0208125
SL001947	MIA	cg20631044	0.00234237	0.000730485	0.00143741	-0.000510889	7.24525e-05	6.58502e-12	0.00292861	0.000765037	0.000147195	1.14749	0.469077	0.014811	0.250277	0.0208249
SL000316	C4	cg26492916	0.00345375	0.000902977	0.000149105	0.000119503	3.17097e-05	0.000185725	0.00391663	0.000909439	2.03268e-05	-3.87338	1.32404	0.00361231	0.134022	0.0208387
SL000316	C4	cg26492916	0.00345375	0.000902977	0.000149105	0.000119503	3.17097e-05	0.000185725	0.00391663	0.000909439	2.03268e-05	-3.87338	1.32404	0.00361231	0.134022	0.0208387
SL005209	Notch-3	cg02327522	0.00591009	0.000566208	5.08519e-23	0.000371099	7.55861e-05	1.27232e-06	0.00624844	0.000577261	1.85977e-24	-0.911774	0.348185	0.00912189	0.057251	0.0208586
SL000052	Troponin T	cg04904030	0.00621411	0.000916767	3.78302e-11	-0.000576414	0.000137835	3.46905e-05	0.00670843	0.00092744	2.01966e-12	0.857583	0.309549	0.00582796	0.0795485	0.020911
SL014470	BCAR3	cg15495124	-0.00256645	0.000741917	0.000592659	-0.000419006	0.00011032	0.000165555	-0.00294725	0.000747469	9.31571e-05	-0.90882	0.312387	0.00380015	0.148377	0.0209114
SL000506	Luteinizing hormone	cg14094987	0.0142845	0.00181761	2.79114e-14	-0.000260821	4.25914e-05	1.96748e-09	0.0129949	0.00187988	1.60736e-11	-4.94424	1.98283	0.0130009	0.090277	0.0209207
SL003182	Integrin aVb5	cg07249742	0.00343001	0.000804446	2.44607e-05	-0.000301831	7.32753e-05	4.51976e-05	0.00386051	0.000813292	2.77631e-06	1.4263	0.511438	0.00551312	0.12551	0.0209262
SL014292	SIG14	cg02957799	0.0048865	0.0012065	6.03601e-05	-0.000404296	6.21189e-05	2.04638e-10	0.00397339	0.00125533	0.00165612	-2.25852	0.914463	0.0138937	0.186864	0.0209372
SL014270	CLM6	cg20338276	0.00642427	0.000666351	3.80702e-20	-0.000350835	9.69483e-05	0.000329038	0.00608907	0.000670003	3.09517e-18	-0.955442	0.318745	0.00287058	0.0521775	0.0209751
SL005195	LAG-3	cg01244006	0.00746282	0.00113219	1.20059e-10	0.000409404	8.85158e-05	4.87629e-06	0.00681529	0.00115069	6.23048e-09	1.58164	0.593735	0.00799726	0.0867677	0.0209772
SL004843	Ephrin-A2	cg02695467	0.00445075	0.000487123	2.14635e-18	0.000212881	5.9226e-05	0.000360774	0.00420546	0.000489673	1.43231e-16	1.15227	0.382624	0.00274504	0.0551134	0.0209782
SL010520	AURKB	cg23178322	0.00265883	0.000680681	0.000108051	-0.000272685	5.71432e-05	2.46379e-06	0.00225937	0.000693012	0.0011972	-1.46491	0.555419	0.00863971	0.150238	0.020979
SL006922	RAD51	cg11789612	0.0023141	0.000643963	0.000361909	0.000481667	8.45405e-05	2.18937e-08	0.00274632	0.000662677	4.06897e-05	-0.897328	0.355396	0.0119145	0.186774	0.0209793
SL000474	IL-16	cg07326149	0.00283853	0.000574328	1.08775e-06	-0.000490621	6.77243e-05	1.87663e-12	0.00236556	0.000603348	0.000101945	-0.964015	0.39586	0.0152667	0.166624	0.0209818
SL000415	Factor H	cg09551916	0.00268355	0.000440171	2.3033e-09	-0.000446233	8.00265e-05	4.21062e-08	0.0029726	0.000452195	1.34221e-10	0.647764	0.255503	0.0115691	0.107713	0.0210047
SL000414	Factor B	cg23192864	0.00161112	0.000502062	0.00142606	-0.000290516	5.67271e-05	4.48935e-07	0.0019208	0.000513135	0.00020497	1.06595	0.41235	0.0100469	0.192211	0.021014
SL001800	TNF sR-II	cg16047567	0.00807845	0.000674283	5.93877e-29	-0.000884178	0.000107873	2.51622e-15	0.00869682	0.000718399	1.91296e-29	0.69937	0.290879	0.0166	0.0765453	0.0210482
SL000053	tPA	cg15252948	0.00832537	0.00145913	2.09014e-08	-0.000226834	4.08071e-05	4.63812e-08	0.00736685	0.00149894	1.244e-06	-4.22564	1.66638	0.011553	0.115132	0.0210499
SL001729	G-CSF	cg26925669	0.0020619	0.000708174	0.00377332	-0.000272424	9.18041e-05	0.00316143	0.00170499	0.000705399	0.0160408	-1.31012	0.357169	0.000273423	0.173097	0.021053
SL002706	CD23	cg21121609	0.00419297	0.00104102	6.59734e-05	0.000238173	6.38048e-05	0.000213322	0.00472295	0.00104811	8.40878e-06	-2.22519	0.758576	0.0035227	0.126397	0.0210862
SL005213	RELT	cg24191821	0.0071169	0.000635777	7.27348e-26	-9.02518e-05	1.90526e-05	2.90176e-06	0.00748676	0.000647013	2.54248e-27	4.09805	1.55255	0.00858642	0.0519687	0.0211243
SL005215	Siglec-3	cg21930712	0.00357818	0.00103526	0.000598896	-0.000337783	6.0866e-05	4.86378e-08	0.0029002	0.00106334	0.00662962	-2.00715	0.791815	0.0115829	0.189477	0.0211257
SL004458	Elafin	cg20015689	0.00733098	0.00106285	1.76613e-11	-0.00108359	0.000146566	6.87316e-13	0.00821721	0.00111853	9.43303e-13	0.81786	0.337053	0.0156311	0.120888	0.0211385
SL003323	PARC	cg10689404	0.0148163	0.00109077	1.49279e-35	0.000974748	0.000121917	1.06443e-14	0.0157914	0.00115837	9.50403e-36	-1.00029	0.415891	0.0165611	0.065808	0.0212666
SL008099	CAPG	cg03718845	0.0119541	0.000940608	6.58736e-32	-0.000485281	0.000112054	1.82696e-05	0.01144	0.000953043	4.81253e-29	-1.0593	0.389526	0.00678778	0.0430028	0.0212758
SL004516	MBL	cg07963497	0.00435365	0.00144845	0.00279558	0.000420928	6.3915e-05	1.24911e-10	0.00544569	0.00150746	0.000337044	-2.59437	1.05543	0.0143389	0.250834	0.0212832
SL009089	PGCB	cg22808351	-0.00286269	0.000829285	0.000608306	-0.000437858	7.26417e-05	3.43622e-09	-0.00228268	0.000856808	0.00799195	1.32465	0.53158	0.0130609	0.202609	0.0212861
SL002706	CD23	cg27615578	0.00419297	0.00104102	6.59734e-05	0.000868121	8.59864e-05	9.23186e-22	0.0053521	0.00114597	3.96581e-06	-1.33522	0.564732	0.0184823	0.276446	0.0213321
SL000451	HSP 70	cg26408612	0.00621418	0.000753224	1.69622e-15	-0.000517692	8.73682e-05	6.13e-09	0.00673212	0.00077713	8.00408e-17	1.00048	0.400561	0.0128511	0.0833478	0.0213593
SL009045	ENPP7	cg24754689	0.00535713	0.00178297	0.00280503	-0.000143257	5.3858e-05	0.00809039	0.00635243	0.0017586	0.000337253	6.94761	1.5141	5.77223e-06	0.185789	0.0213789
SL005430	SECTM1	cg23389808	0.00491231	0.000644944	1.52655e-13	0.000432439	0.000131537	0.00108901	0.00459518	0.000645947	4.43472e-12	0.733359	0.227777	0.00137582	0.0645588	0.021433
SL008122	DUS3	cg00170188	-0.00699607	0.00240753	0.00383933	-0.000236853	5.21988e-05	7.28148e-06	-0.00564289	0.00244477	0.0214366	5.71316	2.1409	0.00788809	0.19342	0.0214332
SL018256	CHKB	cg05521619	-0.0118553	0.00115612	2.43005e-22	0.000397589	0.000117056	0.000742083	-0.0112858	0.00115956	1.83582e-20	-1.43223	0.458133	0.00188398	0.0480326	0.0214353
SL000316	C4	cg20159839	0.00345375	0.000902977	0.000149105	-0.000155464	5.15e-05	0.00268105	0.00390194	0.000900553	1.81381e-05	2.88288	0.81169	0.000422758	0.129767	0.0214395
SL000316	C4	cg20159839	0.00345375	0.000902977	0.000149105	-0.000155464	5.15e-05	0.00268105	0.00390194	0.000900553	1.81381e-05	2.88288	0.81169	0.000422758	0.129767	0.0214395
SL001992	TNF sR-I	cg07778290	0.00973906	0.00065273	2.78778e-41	-0.000302174	6.68989e-05	8.00313e-06	0.00937259	0.000662726	6.75063e-38	-1.21278	0.453867	0.00780844	0.0376288	0.0214594
SL003176	I-309	cg05440824	0.00313722	0.000691138	7.23726e-06	-0.000461312	0.000107558	2.19384e-05	0.00276146	0.000700053	9.25616e-05	-0.814557	0.29914	0.00671848	0.119776	0.021515
SL004298	granzyme A	cg07233761	0.00349307	0.00064455	9.69641e-08	0.000612113	9.34157e-05	1.52795e-10	0.00301074	0.000670472	9.01417e-06	0.787974	0.320999	0.0144707	0.138082	0.0215196
SL004724	MOZ	cg05986168	0.002224	0.000831382	0.0077395	0.000244751	6.61499e-05	0.000241906	0.00264263	0.000836809	0.00169412	-1.71039	0.583083	0.00352206	0.188229	0.021527
SL010388	Trypsin 2	cg21484213	0.00602569	0.00128942	3.90765e-06	0.000475549	6.17435e-05	8.38076e-14	0.00713868	0.00136341	2.51138e-07	-2.34044	0.971797	0.0164201	0.184708	0.0215273
SL014268	OX2G	cg13001495	0.00159982	0.000574712	0.00559834	0.000373227	6.68626e-05	4.09218e-08	0.00122269	0.000590595	0.0389916	1.01045	0.400606	0.0119999	0.235731	0.0215315
SL004298	granzyme A	cg07262873	0.00349307	0.00064455	9.69641e-08	-0.00051116	7.92632e-05	2.87126e-10	0.00396875	0.00066955	6.07499e-09	0.930595	0.378303	0.0142668	0.136179	0.0215399
SL003177	sICAM-2	cg25888914	0.0018218	0.000677025	0.00738736	-0.000271941	6.48288e-05	3.2824e-05	0.00145942	0.000685046	0.0336739	-1.33259	0.485054	0.00624686	0.198916	0.0215471
SL003341	Fibrinogen g-chain dimer	cg04959480	0.00268037	0.0010625	0.0119831	0.000391883	9.6492e-05	5.74036e-05	0.00323832	0.00107355	0.00270022	-1.42376	0.510761	0.00553261	0.20816	0.0215472
SL001729	G-CSF	cg23776012	0.0020619	0.000708174	0.00377332	0.00104879	0.000122679	1.90974e-16	0.0013874	0.000759137	0.0682659	0.643115	0.269532	0.0174405	1	0.0215498
SL003060	bFGF-R	cg09121695	0.00310438	0.00050373	1.57088e-09	0.000540594	6.11069e-05	1.98107e-17	0.00261078	0.000542399	2.02127e-06	0.913061	0.383659	0.0177286	0.159	0.0215519
SL000558	Prothrombin	cg12389611	-0.00138569	0.000482555	0.0042741	0.000349949	9.42303e-05	0.000229438	-0.00162894	0.000485781	0.000865272	0.695101	0.237594	0.00360969	0.175544	0.0215536
SL003303	CCL28	cg07749597	0.00366	0.001545	0.0182545	-0.000736735	0.000124099	5.75966e-09	0.00472287	0.00159441	0.00321477	1.44268	0.579085	0.013082	0.290402	0.0216058
SL006922	RAD51	cg17834289	0.0023141	0.000643963	0.000361909	0.000234707	4.71184e-05	8.99609e-07	0.00270141	0.000657213	4.68929e-05	-1.65017	0.63743	0.00994126	0.167368	0.0216137
SL000507	Lymphotoxin a1/b2	cg04363228	-0.00313023	0.000605886	3.57809e-07	0.000645951	0.000109496	7.13128e-09	-0.00271473	0.000625056	1.73365e-05	-0.643241	0.257935	0.012993	0.132739	0.0216187
SL000507	Lymphotoxin a1/b2	cg04363228	-0.00313023	0.000605886	3.57809e-07	0.000645951	0.000109496	7.13128e-09	-0.00271473	0.000625056	1.73365e-05	-0.643241	0.257935	0.012993	0.132739	0.0216187
SL007696	C1QR1	cg26686732	0.00307146	0.000573058	1.32454e-07	0.000435139	9.93889e-05	1.48504e-05	0.0033859	0.000580977	1.06231e-08	-0.722614	0.26788	0.00724461	0.102374	0.0216415
SL000616	Vitronectin	cg12223801	-0.00219761	0.000789008	0.00557036	-0.000349174	0.000102563	0.000721314	-0.00181037	0.000791472	0.0226329	1.10902	0.356491	0.00198191	0.17621	0.0216446
SL000420	Ferritin	cg06781209	0.00836845	0.00229777	0.00030145	0.000890951	0.000135173	1.20319e-10	0.00664415	0.00239126	0.00568573	1.93534	0.789995	0.0146672	0.206047	0.0216571
SL011809	XTP3A	cg09099830	0.0047245	0.000700749	4.75873e-11	-0.000459279	0.00011859	0.000123386	0.00436423	0.000706706	1.46852e-09	-0.784417	0.275173	0.00456238	0.0762549	0.0216885
SL000420	Ferritin	cg03431111	0.00836845	0.00229777	0.00030145	-0.000649719	0.000120936	1.23871e-07	0.00982428	0.00235511	3.62275e-05	2.24071	0.882578	0.0114534	0.173966	0.021709
SL000678	Granulysin	cg24504864	0.00543645	0.00107012	5.49814e-07	-0.000234469	5.20075e-05	8.30788e-06	0.00483929	0.00108638	1.05851e-05	-2.54685	0.955112	0.00793523	0.109843	0.0217249
SL005200	MICB	cg00406022	0.00502956	0.00119425	3.05953e-05	-0.000708503	0.000181474	0.000108874	0.00564488	0.0012048	3.69932e-06	0.868481	0.306153	0.00476134	0.122341	0.0217377
SL014292	SIG14	cg09702010	0.0048865	0.0012065	6.03601e-05	-0.00096247	0.000128555	3.80389e-13	0.00386117	0.00127322	0.00256635	-1.06531	0.44202	0.016353	0.209829	0.0217813
SL005156	DAN	cg12065228	0.0103134	0.00102147	9.09315e-22	-0.000562819	0.000120861	4.21974e-06	0.00973009	0.00103872	3.4687e-19	-1.03647	0.393226	0.00868055	0.0565616	0.0217993
SL012395	NET1	cg17003260	0.00983546	0.000835842	4.25248e-28	0.000357228	5.02435e-05	4.51214e-12	0.00916463	0.000876285	4.36619e-23	1.87787	0.774914	0.0157681	0.068205	0.0218045
SL014735	IMDH1	cg14361586	0.00516871	0.00180983	0.00448694	-0.000301806	4.90369e-05	1.64689e-09	0.00388805	0.00187291	0.0384589	-4.24331	1.7169	0.013819	0.247771	0.0218197
SL005200	MICB	cg16095155	0.00502956	0.00119425	3.05953e-05	-0.00041834	7.10411e-05	7.57038e-09	0.00421342	0.00123191	0.000682188	-1.9509	0.783636	0.0131473	0.162269	0.021845
SL005200	MICB	cg14307300	0.00502956	0.00119425	3.05953e-05	-0.000396682	6.65795e-05	5.11823e-09	0.00420554	0.00123298	0.000705402	-2.07727	0.836172	0.0133414	0.163835	0.0218521
SL005200	MICB	cg21620139	0.00502956	0.00119425	3.05953e-05	-0.000578797	0.00019149	0.00264765	0.00561754	0.00119138	3.21875e-06	1.01587	0.288791	0.000479181	0.116905	0.0218753
SL004362	SCGF-alpha	cg08678044	0.00342982	0.00091736	0.00020837	-0.000486263	0.000162197	0.00286586	0.00297788	0.000914745	0.00121654	-0.929409	0.261259	0.000413722	0.131767	0.0218783
SL000414	Factor B	cg10310595	0.00161112	0.000502062	0.00142606	-0.000320825	5.84211e-05	6.63541e-08	0.00193526	0.000515405	0.000196003	1.01032	0.400532	0.0119951	0.201186	0.0218941
SL003066	PEDF	cg06568880	0.00245857	0.000440429	4.08245e-08	0.000731397	6.78538e-05	2.75459e-24	0.00193976	0.000490942	9.01481e-05	0.709344	0.302473	0.0194483	0.211021	0.0219322
SL008158	H31	cg03349184	0.00770477	0.00115235	6.71583e-11	0.000387214	4.86271e-05	1.34999e-14	0.00872768	0.00122354	3.88875e-12	-2.6417	1.10404	0.0171269	0.132763	0.0219323
SL004139	Ephrin-A3	cg01782486	-0.00165059	0.000598347	0.00603867	0.000591607	0.000100991	8.9811e-09	-0.00124438	0.000616949	0.0442835	-0.686623	0.275884	0.0131738	0.2461	0.021984
SL000507	Lymphotoxin a1/b2	cg18365536	-0.00313023	0.000605886	3.57809e-07	-0.000284147	5.35616e-05	1.76242e-07	-0.00274984	0.000620638	1.17883e-05	1.33869	0.527165	0.0114363	0.12152	0.0219911
SL000507	Lymphotoxin a1/b2	cg18365536	-0.00313023	0.000605886	3.57809e-07	-0.000284147	5.35616e-05	1.76242e-07	-0.00274984	0.000620638	1.17883e-05	1.33869	0.527165	0.0114363	0.12152	0.0219911
SL004915	NCC27	cg20794828	-0.0071386	0.00266416	0.0076389	-0.000474966	8.67357e-05	7.18424e-08	-0.00884767	0.00273404	0.00129972	-3.5983	1.42693	0.0120179	0.239412	0.0219921
SL000062	PSA	cg19582822	0.0052903	0.00161788	0.00115699	-0.000655561	0.000104205	7.37542e-10	0.00645323	0.00167712	0.000136136	1.77395	0.721513	0.014316	0.219823	0.0220228
SL000592	TIMP-2	cg25178683	0.00280883	0.000528114	1.6401e-07	0.000555676	0.000101213	6.67156e-08	0.00314857	0.00054209	1.18566e-08	-0.611401	0.242665	0.012092	0.120955	0.0220268
SL012783	WFKN1	cg07945221	-0.00230958	0.000844852	0.00650562	-0.000225651	4.76711e-05	2.94794e-06	-0.00182323	0.000859833	0.0345079	2.15533	0.823772	0.00918076	0.21058	0.022028
SL008623	CNTN2	cg06437052	0.00612979	0.000933543	1.403e-10	-0.000363144	6.58401e-05	5.82281e-08	0.00673182	0.000958483	7.8911e-12	1.65783	0.658714	0.012185	0.0982137	0.0220411
SL000064	Kallikrein 7	cg22918012	-0.0039735	0.000825654	2.02678e-06	0.000434521	6.96342e-05	9.96986e-10	-0.00338424	0.000855326	8.80889e-05	-1.35611	0.551008	0.0142181	0.148297	0.0220503
SL009045	ENPP7	cg13801193	0.00535713	0.00178297	0.00280503	-0.000521503	8.57794e-05	2.54128e-09	0.00411262	0.00184327	0.0261555	-2.38639	0.965876	0.0138489	0.232309	0.022085
SL005218	Siglec-7	cg02458065	0.00454039	0.000583299	4.75721e-14	0.000898316	0.000139614	3.14261e-10	0.00496848	0.000605891	2.47074e-15	-0.476553	0.194586	0.0146992	0.0942861	0.0220872
SL004458	Elafin	cg26040816	0.00733098	0.00106285	1.76613e-11	0.000336495	8.55627e-05	9.69883e-05	0.00787661	0.00107257	9.60887e-13	-1.62149	0.576098	0.0050946	0.0744271	0.0220897
SL004298	granzyme A	cg24975342	0.00349307	0.00064455	9.69641e-08	-0.000189335	5.18954e-05	0.000294292	0.00317244	0.000648473	1.3853e-06	-1.69343	0.576197	0.00346004	0.0917894	0.022094
SL000316	C4	cg19730924	0.00345375	0.000902977	0.000149105	-0.000495334	6.63223e-05	4.17394e-13	0.00420973	0.000951743	1.21876e-05	1.52619	0.634955	0.016634	0.218884	0.0221352
SL000316	C4	cg19730924	0.00345375	0.000902977	0.000149105	-0.000495334	6.63223e-05	4.17394e-13	0.00420973	0.000951743	1.21876e-05	1.52619	0.634955	0.016634	0.218884	0.0221352
SL005361	Apo D	cg23162396	0.00372037	0.000736558	6.37271e-07	-0.00021334	3.69065e-05	1.38413e-08	0.00421485	0.000758795	4.74481e-08	2.3178	0.930309	0.013079	0.132911	0.0221394
SL007207	TSP4	cg14478163	0.00795395	0.000714406	1.25682e-25	0.00052905	8.69461e-05	2.47734e-09	0.00745361	0.000738779	9.87682e-22	0.945742	0.383064	0.0139205	0.0629052	0.0221525
SL005200	MICB	cg09878914	0.00502956	0.00119425	3.05953e-05	-0.000159382	4.94301e-05	0.00135329	0.00560942	0.00119536	3.57531e-06	3.63818	1.12098	0.00125893	0.11529	0.0221708
SL000382	CK-MM	cg14580081	-0.00766185	0.00165003	4.4849e-06	-0.000479589	7.44768e-05	3.0403e-10	-0.00645235	0.00171394	0.000188595	2.52195	1.03076	0.0147939	0.15786	0.0221863
SL000498	Leptin	cg22539431	0.00464792	0.0017562	0.00841113	-0.000627256	0.000117811	1.5913e-07	0.00354786	0.00179913	0.0492138	-1.75376	0.692473	0.0116554	0.236678	0.0221929
SL009207	Dynactin subunit 2	cg20409636	0.0049212	0.000522017	2.12069e-19	-0.000368564	6.08149e-05	2.84222e-09	0.00528465	0.000539587	1.10668e-20	0.986122	0.399308	0.0138924	0.0738537	0.0221964
SL000316	C4	cg25693349	0.00345375	0.000902977	0.000149105	0.000381089	0.000116089	0.00110732	0.00301518	0.000904546	0.00092827	1.15085	0.361035	0.00153348	0.126985	0.0222032
SL000316	C4	cg25693349	0.00345375	0.000902977	0.000149105	0.000381089	0.000116089	0.00110732	0.00301518	0.000904546	0.00092827	1.15085	0.361035	0.00153348	0.126985	0.0222032
SL005200	MICB	cg00718684	0.00502956	0.00119425	3.05953e-05	-0.000485507	0.000136888	0.000430465	0.00561776	0.00120024	3.78295e-06	1.21152	0.405485	0.00296207	0.116948	0.0223087
SL011535	RBM39	cg23242649	0.00299077	0.00124005	0.0162687	-0.000181339	5.89548e-05	0.00222518	0.00359403	0.00123847	0.00388851	3.32668	0.97475	0.000700471	0.201705	0.0223215
SL002505	ANP	cg03321020	0.00396435	0.00131945	0.00280631	0.000671125	0.000157837	2.5713e-05	0.00325751	0.0013361	0.0151476	1.05322	0.388781	0.00700234	0.1783	0.0223285
SL004915	NCC27	cg20408074	-0.0071386	0.00266416	0.0076389	-0.0023357	0.000284975	2.51106e-15	-0.0047237	0.00283846	0.0967625	1.03391	0.434633	0.0177782	1	0.0223398
SL003739	DcR3	cg05282437	0.00269907	0.00097099	0.00566673	0.000548639	0.000144343	0.000163817	0.00220781	0.00097862	0.0245437	0.895406	0.313247	0.00445327	0.182009	0.0223405
SL008486	LEG9	cg14854355	0.00615166	0.000787298	3.9279e-14	0.00115068	0.000157351	1.19903e-12	0.00679944	0.0008282	2.34861e-15	-0.562948	0.234107	0.0165898	0.1053	0.0223523
SL003672	SOD3	cg20754465	0.0046106	0.000645127	3.62841e-12	-0.000326938	8.40866e-05	0.000116322	0.00427867	0.00065088	1.37131e-10	-1.01526	0.35969	0.00497602	0.0719925	0.0223614
SL004363	SCGF-alpha	cg26522743	0.00377795	0.00100635	0.000196402	-0.000527302	0.000101562	3.13881e-07	0.00316021	0.00102947	0.00227024	-1.1715	0.460764	0.0113354	0.16351	0.0224058
SL004298	granzyme A	cg17405000	0.00349307	0.00064455	9.69641e-08	-0.000128519	3.51583e-05	0.000286551	0.00317345	0.000648571	1.37989e-06	-2.48698	0.850577	0.00362919	0.0915025	0.0224121
SL005172	IGFBP-6	cg16264705	0.00755524	0.000703482	3.82194e-24	0.00096221	0.000107859	1.12033e-17	0.00686535	0.000758489	4.11929e-18	0.716985	0.303582	0.0186083	0.0913127	0.0224246
SL018548	a1-Antichymotrypsin	cg06190732	0.00337759	0.00064868	2.91427e-07	-0.00047403	9.31568e-05	5.28867e-07	0.00377048	0.000662869	2.30419e-08	0.828838	0.324481	0.010964	0.116324	0.0224382
SL005173	IL-10 Ra	cg00467529	0.00233681	0.000465393	7.37574e-07	-0.000248274	4.45016e-05	4.14958e-08	0.00263895	0.000478236	5.75685e-08	1.21695	0.486408	0.0127019	0.129295	0.0224384
SL005084	Periostin	cg09907509	0.00746965	0.00066655	6.4268e-26	0.00231021	0.000224854	2.03368e-22	0.00672369	0.000735941	2.12759e-18	0.322896	0.137993	0.0197176	0.0998649	0.0225181
SL009948	PLXB2	cg00143809	0.00426742	0.000568541	3.20803e-13	-0.000279654	4.63939e-05	3.42203e-09	0.00387505	0.00058742	1.16517e-10	-1.40305	0.569479	0.0141166	0.0919455	0.0225719
SL019019	PIANP	cg08284733	0.00297895	0.000717388	3.92765e-05	-0.000258852	5.33953e-05	1.71565e-06	0.00339771	0.000731133	4.41582e-06	1.61775	0.625968	0.0100658	0.140573	0.0225736
SL004298	granzyme A	cg21173440	0.00349307	0.00064455	9.69641e-08	-0.00023453	7.32208e-05	0.00145478	0.00318264	0.000645041	1.13113e-06	-1.32363	0.407543	0.00124875	0.0888706	0.0225742
SL000640	Nidogen	cg00855021	0.00320261	0.000821076	0.000110372	-0.000206604	2.86973e-05	2.49584e-12	0.0038632	0.000861807	9.33092e-06	3.19736	1.33001	0.0166134	0.206265	0.0225932
SL002706	CD23	cg03585611	0.00419297	0.00104102	6.59734e-05	-0.000652047	8.16042e-05	1.11558e-14	0.00511595	0.00110601	4.87868e-06	1.4155	0.595013	0.0177748	0.220124	0.0226055
SL008631	DSC2	cg25970832	0.00699782	0.000584003	5.94826e-29	0.00116925	0.000102761	1.41359e-26	0.00627714	0.000658553	9.33691e-20	0.616366	0.264856	0.0203939	0.102987	0.0226092
SL004915	NCC27	cg11823230	-0.0071386	0.00266416	0.0076389	0.000462615	7.76477e-05	5.10031e-09	-0.00895814	0.00275025	0.00120888	3.93317	1.59441	0.0139968	0.254888	0.0226553
SL012774	CREL1	cg00166722	0.00416943	0.000722557	1.45865e-08	0.000193667	6.2728e-05	0.00214168	0.00451761	0.000721879	8.97705e-10	-1.79788	0.532228	0.000792537	0.0835102	0.0226697
SL006522	LG3BP	cg27623948	0.00311453	0.000973194	0.00146818	-0.000546989	9.73093e-05	3.30142e-08	0.00248107	0.00100053	0.0135066	-1.15808	0.464682	0.0130485	0.203388	0.0227075
SL006924	ART	cg10556064	-0.00377746	0.000646691	9.85121e-09	0.00108147	0.000183346	7.14327e-09	-0.00421569	0.000667145	6.26941e-10	0.405217	0.164081	0.0138909	0.116012	0.0227258
SL006522	LG3BP	cg15192143	0.00311453	0.000973194	0.00146818	-0.000391524	8.77389e-05	1.02147e-05	0.00364846	0.000987661	0.000247433	1.36374	0.514922	0.0083662	0.171434	0.0227552
SL000678	Granulysin	cg25482454	0.00543645	0.00107012	5.49814e-07	-0.000662074	7.08291e-05	3.97212e-19	0.00434443	0.00116203	0.000208483	-1.6494	0.702518	0.019308	0.200871	0.0227795
SL005200	MICB	cg07537699	0.00502956	0.00119425	3.05953e-05	-0.000271732	6.26586e-05	1.7825e-05	0.00567483	0.00121052	3.65494e-06	2.37466	0.887546	0.00773079	0.128296	0.0227835
SL000525	MMP-7	cg22104427	0.00991017	0.00112025	1.97363e-17	-0.000378159	9.89969e-05	0.000151907	0.0104728	0.00112931	7.17845e-19	1.48781	0.524744	0.00478125	0.0567729	0.0228046
SL004915	NCC27	cg23781467	-0.0071386	0.00266416	0.0076389	-0.000578271	8.30258e-05	1.14704e-11	-0.00921645	0.00278712	0.00101812	-3.59321	1.49159	0.0163918	0.291072	0.0228071
SL014268	OX2G	cg23646888	0.00159982	0.000574712	0.00559834	0.000689172	0.000121523	2.52524e-08	0.00122227	0.000591324	0.0392997	0.547828	0.22046	0.0133168	0.235994	0.0228444
SL017106	IFN10	cg12840719	0.003764	0.00114903	0.0011347	0.000313237	0.000100993	0.00204549	0.00320872	0.00114828	0.00542186	1.77271	0.529195	0.000876522	0.147523	0.022855
SL000316	C4	cg22786748	0.00345375	0.000902977	0.000149105	-0.000892187	0.000123091	1.82448e-12	0.00418533	0.000948751	1.28404e-05	0.819976	0.342131	0.0169483	0.211819	0.0228758
SL000316	C4	cg22786748	0.00345375	0.000902977	0.000149105	-0.000892187	0.000123091	1.82448e-12	0.00418533	0.000948751	1.28404e-05	0.819976	0.342131	0.0169483	0.211819	0.0228758
SL005102	SHBG	cg14775474	0.00429326	0.00120378	0.000399889	-0.000118481	4.05484e-05	0.00365025	0.00370496	0.00119915	0.00212604	-4.96537	1.36916	0.000319547	0.137029	0.0228866
SL005218	Siglec-7	cg06266388	0.00454039	0.000583299	4.75721e-14	0.000346871	7.3942e-05	3.59659e-06	0.00487166	0.000593466	2.32252e-15	-0.955036	0.367103	0.00958283	0.0729618	0.022899
SL000344	Cathepsin D	cg07050626	0.00726572	0.00112617	2.85095e-10	-0.00058052	6.22166e-05	4.74658e-19	0.00841941	0.00122378	2.01057e-11	1.98734	0.847182	0.0194171	0.158786	0.0229041
SL001802	IFN-g	cg05224770	0.00222131	0.000820492	0.00703813	-0.000557166	0.000113649	1.31769e-06	0.00174051	0.00083672	0.0380703	-0.86295	0.336031	0.0105449	0.216451	0.0229143
SL007674	LY9	cg05643453	0.00223361	0.000754654	0.00323832	-0.000673003	8.03069e-05	6.53089e-16	0.00153861	0.000806424	0.0570249	-1.03268	0.436917	0.0185183	1	0.0229174
SL018548	a1-Antichymotrypsin	cg02264229	0.00337759	0.00064868	2.91427e-07	0.00105695	0.00010211	1.08622e-22	0.00410804	0.000717532	1.88028e-08	-0.691089	0.296379	0.0201491	0.216262	0.0229197
SL005200	MICB	cg06151074	0.00502956	0.00119425	3.05953e-05	-0.000709488	7.40253e-05	6.11106e-20	0.00377937	0.00130287	0.00390278	-1.7621	0.752631	0.0196511	0.248568	0.0229434
SL000420	Ferritin	cg02315732	0.00836845	0.00229777	0.00030145	-0.00199972	0.000137164	8.02629e-40	0.0119555	0.00276732	1.91365e-05	1.79376	0.779122	0.0217675	0.428636	0.0229595
SL014009	HDGR2	cg12007399	0.00433966	0.000955934	7.21352e-06	0.00118758	0.000127987	6.88604e-19	0.00337124	0.001037	0.00123546	0.815456	0.347676	0.019432	0.223156	0.0229704
SL004363	SCGF-alpha	cg08678044	0.00377795	0.00100635	0.000196402	-0.000486263	0.000162197	0.00286586	0.00329161	0.00100401	0.00112355	-1.00014	0.286754	0.000534206	0.128729	0.0229946
SL000474	IL-16	cg19293752	0.00283853	0.000574328	1.08775e-06	-0.000403096	6.26992e-05	3.25582e-10	0.0024196	0.000596686	5.90018e-05	-1.03926	0.427598	0.0154672	0.147584	0.0230007
SL000507	Lymphotoxin a1/b2	cg14630748	-0.00313023	0.000605886	3.57809e-07	-0.000940179	0.000170055	5.44643e-08	-0.00274086	0.000622348	1.32649e-05	0.41415	0.166081	0.0129981	0.124392	0.0230178
SL000507	Lymphotoxin a1/b2	cg14630748	-0.00313023	0.000605886	3.57809e-07	-0.000940179	0.000170055	5.44643e-08	-0.00274086	0.000622348	1.32649e-05	0.41415	0.166081	0.0129981	0.124392	0.0230178
SL004260	resistin	cg06586599	0.00373419	0.000905999	4.46791e-05	-0.000180927	4.85653e-05	0.000219369	0.00418363	0.000912463	5.87191e-06	2.48411	0.865834	0.00430842	0.120359	0.0230207
SL005218	Siglec-7	cg18117347	0.00454039	0.000583299	4.75721e-14	0.000627238	0.000125804	8.78156e-07	0.00488609	0.000595393	2.36196e-15	-0.551159	0.215825	0.0109824	0.0761407	0.0230302
SL018891	DSCAM	cg26735353	0.002315	0.00080732	0.00433062	0.000431701	9.22584e-05	3.81003e-06	0.00185597	0.000821426	0.0243319	1.06329	0.408998	0.00963535	0.198283	0.0230531
SL004151	IL-15 Ra	cg03626186	0.00592776	0.000845948	8.75967e-12	0.000777526	9.30653e-05	7.93371e-16	0.00670459	0.000903742	5.8268e-13	-0.999103	0.423091	0.0186238	0.131049	0.0230618
SL004260	resistin	cg08565675	0.00373419	0.000905999	4.46791e-05	-0.00026866	4.80352e-05	3.84816e-08	0.00432029	0.000931228	4.57365e-06	2.18155	0.877327	0.0132542	0.156954	0.0230774
SL000519	MIP-1a	cg24606595	0.0085858	0.00120074	3.46349e-12	-0.000182215	5.70881e-05	0.00151144	0.00801117	0.00120168	7.59614e-11	-3.15356	0.974905	0.00130628	0.0669275	0.0230877
SL003177	sICAM-2	cg11937797	0.0018218	0.000677025	0.00738736	-0.000395817	6.29315e-05	7.45041e-10	0.00133922	0.000701942	0.0570344	-1.2192	0.50055	0.0152443	1	0.0231258
SL004139	Ephrin-A3	cg05037680	-0.00165059	0.000598347	0.00603867	-0.000234349	4.37908e-05	1.38378e-07	-0.00127662	0.000613302	0.0379416	1.59578	0.636183	0.0124761	0.226566	0.023132
SL000344	Cathepsin D	cg14803762	0.00726572	0.00112617	2.85095e-10	-0.000397344	7.12847e-05	4.2858e-08	0.00799576	0.00115762	1.69078e-11	1.83731	0.738862	0.0132551	0.100478	0.0231507
SL000497	Laminin	cg25845688	0.00574291	0.00106975	1.26467e-07	-0.000353492	0.000101129	0.000519296	0.00522545	0.00107467	1.59802e-06	-1.46386	0.490063	0.00296804	0.0901045	0.0231555
SL000509	Lymphotoxin b R	cg11700959	0.00263633	0.000807293	0.00117448	-0.000581157	7.82813e-05	5.62387e-13	0.00330227	0.00085033	0.000118218	1.14589	0.480474	0.0174914	0.252603	0.0231692
SL000507	Lymphotoxin a1/b2	cg00466425	-0.00313023	0.000605886	3.57809e-07	-0.000408038	6.7644e-05	3.35397e-09	-0.00271269	0.000626212	1.8212e-05	1.0233	0.417619	0.0146495	0.133391	0.0231974
SL000507	Lymphotoxin a1/b2	cg00466425	-0.00313023	0.000605886	3.57809e-07	-0.000408038	6.7644e-05	3.35397e-09	-0.00271269	0.000626212	1.8212e-05	1.0233	0.417619	0.0146495	0.133391	0.0231974
SL003327	Factor D	cg17841440	0.00826188	0.00065121	8.62886e-32	-0.000490279	6.3934e-05	1.06425e-13	0.00881543	0.000688506	2.9267e-32	1.12905	0.475091	0.0178914	0.0670007	0.0232078
SL000344	Cathepsin D	cg25336198	0.00726572	0.00112617	2.85095e-10	-0.000852307	0.000105651	6.53276e-15	0.00626	0.00119844	2.68823e-07	-1.17999	0.498845	0.0184304	0.138419	0.0232147
SL003739	DcR3	cg03495011	0.00269907	0.00097099	0.00566673	-0.00146382	0.000138757	2.03323e-23	0.00381099	0.00107827	0.000450784	0.759607	0.32684	0.020562	0.411966	0.0232278
SL014111	KIRR3	cg08914797	0.00229708	0.000749551	0.00230881	0.000295965	6.81079e-05	1.71438e-05	0.00270035	0.000759862	0.000419497	-1.36255	0.511969	0.00805708	0.175556	0.0232336
SL007871	Cytidylate kinase	cg16321568	-0.00214624	0.000794352	0.0071525	0.000139483	3.53168e-05	9.07417e-05	-0.00255109	0.000801981	0.00156829	2.90251	1.04679	0.00578667	0.188632	0.023247
SL004145	HVEM	cg15818632	0.00272435	0.00071403	0.00015476	-0.000391379	6.61462e-05	6.46866e-09	0.00223997	0.000736975	0.00250769	-1.23762	0.503836	0.0144079	0.177797	0.0232887
SL011535	RBM39	cg10566581	0.00299077	0.00124005	0.0162687	0.000583559	6.66801e-05	4.13626e-17	0.00417981	0.00133377	0.00183711	-2.03756	0.86755	0.0192703	0.397568	0.0233066
SL005173	IL-10 Ra	cg20110707	0.00233681	0.000465393	7.37574e-07	-0.000431548	4.25425e-05	6.07006e-22	0.0028482	0.00051266	4.70692e-08	1.18502	0.509274	0.0204085	0.218843	0.0233303
SL009045	ENPP7	cg14565120	0.00535713	0.00178297	0.00280503	-0.000117623	4.95662e-05	0.0180534	0.00392698	0.00169016	0.0205934	-12.1587	1.58364	9.91507e-14	0.266962	0.0233762
SL005213	RELT	cg08679180	0.0071169	0.000635777	7.27348e-26	-0.000601386	7.16519e-05	6.00511e-16	0.00770237	0.000679745	2.18154e-26	0.973528	0.413468	0.0189695	0.0822641	0.0233886
SL005221	SREC-I	cg00639041	0.00427715	0.000998574	2.2455e-05	0.000126269	2.99107e-05	2.92751e-05	0.00480293	0.00101097	2.71733e-06	-4.16395	1.5495	0.00746625	0.122927	0.0233932
SL007310	RAC3	cg18437808	-0.00562849	0.00230917	0.0151709	-0.00071158	0.000103292	1.86392e-11	-0.0074025	0.00241337	0.00228835	-2.49306	1.03924	0.016843	0.315184	0.0234822
SL003332	MMP-17	cg23679376	0.00214594	0.000896659	0.0171028	-0.00021388	5.55088e-05	0.000133359	0.00259567	0.000904379	0.00429448	2.10271	0.750842	0.00532007	0.209572	0.023492
SL005215	Siglec-3	cg15776494	0.00357818	0.00103526	0.000598896	-0.000406965	8.94581e-05	6.91188e-06	0.00300574	0.0010518	0.00446276	-1.40662	0.538508	0.00929704	0.159982	0.0234988
SL007674	LY9	cg11721194	0.00223361	0.000754654	0.00323832	-0.000490664	9.21555e-05	1.59083e-07	0.00176635	0.000773227	0.0228066	-0.952297	0.380463	0.0126626	0.209194	0.0235018
SL000406	Eotaxin	cg25033990	0.00870184	0.000939517	7.81041e-19	0.00100041	0.000106351	2.48043e-19	0.00966099	0.00102132	1.64229e-19	-0.958751	0.410802	0.0200361	0.110223	0.023502
SL003302	Ck-b-8-1	cg02695751	0.00488314	0.000761595	3.60686e-10	-0.000277074	7.40616e-05	0.000206609	0.00450599	0.00076726	8.28733e-09	-1.36118	0.478371	0.0046356	0.0772346	0.0235251
SL000507	Lymphotoxin a1/b2	cg23533285	-0.00313023	0.000605886	3.57809e-07	-0.000438979	0.000120956	0.000316509	-0.00342661	0.000609655	3.32703e-08	-0.675155	0.232945	0.00393298	0.0946828	0.0235272
SL000507	Lymphotoxin a1/b2	cg23533285	-0.00313023	0.000605886	3.57809e-07	-0.000438979	0.000120956	0.000316509	-0.00342661	0.000609655	3.32703e-08	-0.675155	0.232945	0.00393298	0.0946828	0.0235272
SL000420	Ferritin	cg09941143	0.00836845	0.00229777	0.00030145	0.000153272	5.10863e-05	0.00284471	0.00726932	0.00229307	0.00162611	7.17111	2.07708	0.000607104	0.131342	0.0235355
SL003201	VEGF sR2	cg08038052	-0.00271309	0.00048045	2.86954e-08	0.000251467	6.02284e-05	3.5644e-05	-0.00296402	0.000486195	2.31005e-09	0.997861	0.370224	0.00729204	0.0924882	0.0235465
SL000316	C4	cg27064867	0.00345375	0.000902977	0.000149105	-0.000438181	8.74446e-05	7.76781e-07	0.00398896	0.00092206	1.8675e-05	1.22142	0.481234	0.0114786	0.154963	0.0235604
SL000316	C4	cg27064867	0.00345375	0.000902977	0.000149105	-0.000438181	8.74446e-05	7.76781e-07	0.00398896	0.00092206	1.8675e-05	1.22142	0.481234	0.0114786	0.154963	0.0235604
SL004915	NCC27	cg19088555	-0.0071386	0.00266416	0.0076389	-9.78982e-05	2.63666e-05	0.000230092	-0.00582852	0.00268307	0.030344	13.3821	4.68495	0.00448005	0.183521	0.023576
SL010520	AURKB	cg22897522	0.00265883	0.000680681	0.000108051	-0.00040425	9.76072e-05	4.11354e-05	0.00230371	0.000688656	0.000890537	-0.878465	0.325042	0.00713801	0.133562	0.0236142
SL000565	Renin	cg21680979	0.00822615	0.00151308	8.85223e-08	-0.000242057	5.57947e-05	1.76825e-05	0.00903532	0.00153382	7.47479e-09	3.3429	1.26026	0.00826736	0.0983658	0.023632
SL016928	SLAF7	cg11174769	0.00621455	0.00127983	1.6553e-06	-0.000193907	5.41599e-05	0.000380424	0.00559032	0.00128718	1.73678e-05	-3.21922	1.10235	0.00367197	0.100446	0.0236366
SL003301	Ck-b-8-1	cg22254135	0.00488257	0.000690764	5.89758e-12	-0.000770434	0.000155692	1.05363e-06	0.00447811	0.000704819	5.10239e-10	-0.524979	0.206309	0.0112682	0.0828378	0.0236384
SL001896	Clusterin	cg18931633	0.00200442	0.000688019	0.00375147	-0.000463767	8.28223e-05	3.71438e-08	0.00244778	0.000707279	0.000589173	0.956005	0.386435	0.0137273	0.221194	0.0236418
SL000321	C5a	cg13696706	0.00278762	0.000533362	2.63003e-07	0.000676766	7.88565e-05	1.45801e-16	0.0022883	0.000571846	7.33837e-05	0.737792	0.314504	0.0194083	0.179118	0.0236434
SL000344	Cathepsin D	cg08057037	0.00726572	0.00112617	2.85095e-10	-0.000509858	6.27087e-05	4.14539e-15	0.00827528	0.00119969	1.79343e-11	1.98009	0.84049	0.018906	0.138949	0.0236478
SL000565	Renin	cg17225426	0.00822615	0.00151308	8.85223e-08	-0.000155647	4.25969e-05	0.000288181	0.00748679	0.0015229	1.23363e-06	-4.75024	1.64847	0.00414328	0.0898794	0.0236571
SL017289	PolyUbiquitin K48	cg19605258	0.00156595	0.000650907	0.0165368	0.000114892	3.72018e-05	0.00213649	0.0018761	0.000650567	0.00411672	-2.69948	0.813118	0.00097337	0.198057	0.0237454
SL007674	LY9	cg17887793	0.00223361	0.000754654	0.00323832	-0.00011859	3.73503e-05	0.00159895	0.00187661	0.000755225	0.0133177	-3.0103	0.934591	0.00136869	0.159828	0.0237483
SL005209	Notch-3	cg19517476	0.00591009	0.000566208	5.08519e-23	-0.000835234	9.95566e-05	6.13657e-16	0.00539089	0.000605267	1.25935e-17	-0.621615	0.264736	0.0192981	0.0878488	0.0237491
SL001797	Kallikrein 6	cg08874512	0.003778	0.000568646	8.8062e-11	0.000529205	7.09038e-05	4.35784e-13	0.00424913	0.000599608	5.32924e-12	-0.890258	0.375311	0.0181085	0.124703	0.0237822
SL000414	Factor B	cg08276125	0.00161112	0.000502062	0.00142606	-0.000178621	3.97857e-05	9.05498e-06	0.00133641	0.000509798	0.00904984	-1.53799	0.587831	0.00918306	0.170513	0.0237883
SL005184	IL-23	cg08699270	0.00631786	0.0010959	1.50269e-08	-0.000805757	0.000102122	2.24025e-14	0.00536985	0.00116224	4.9914e-06	-1.17654	0.498965	0.0187956	0.150052	0.0238685
SL000382	CK-MM	cg05023151	-0.00766185	0.00165003	4.4849e-06	-0.000260176	5.68212e-05	6.0354e-06	-0.00857381	0.00167695	4.68223e-07	-3.50515	1.34993	0.00972106	0.119026	0.0239051
SL004821	S100A4	cg08056629	0.00224545	0.000907372	0.0136977	-0.00047233	7.88325e-05	4.21675e-09	0.00286224	0.000937279	0.00239205	1.30585	0.535531	0.0151323	0.274685	0.0239119
SL000592	TIMP-2	cg02376668	0.00280883	0.000528114	1.6401e-07	-0.000147312	3.97981e-05	0.000240496	0.00306742	0.000531844	1.48571e-08	1.75539	0.615955	0.00457184	0.0920635	0.0239385
SL004458	Elafin	cg09854007	0.00733098	0.00106285	1.76613e-11	0.000488877	9.07277e-05	1.13955e-07	0.0066692	0.00108987	2.02307e-09	1.35367	0.54432	0.0132419	0.0902714	0.0239448
SL005195	LAG-3	cg05712073	0.00746282	0.00113219	1.20059e-10	-0.000407877	7.11072e-05	1.76257e-08	0.00820413	0.00116576	7.20018e-12	1.81748	0.739942	0.0144106	0.0993335	0.0239491
SL000360	Coagulation Factor X	cg12394800	-0.00214785	0.000476879	8.49198e-06	-7.45936e-05	2.30923e-05	0.00132674	-0.00192187	0.000477636	6.71297e-05	3.02949	0.95977	0.00170343	0.105212	0.0239714
SL000507	Lymphotoxin a1/b2	cg13817395	-0.00313023	0.000605886	3.57809e-07	-0.000225613	4.77542e-05	3.07931e-06	-0.00278749	0.000616783	7.9205e-06	1.51916	0.591174	0.0104959	0.109494	0.0239826
SL000507	Lymphotoxin a1/b2	cg13817395	-0.00313023	0.000605886	3.57809e-07	-0.000225613	4.77542e-05	3.07931e-06	-0.00278749	0.000616783	7.9205e-06	1.51916	0.591174	0.0104959	0.109494	0.0239826
SL004673	Cathepsin S	cg17720233	0.00274061	0.000612339	9.64938e-06	-0.000388476	0.00010469	0.000232365	0.00304186	0.00061677	1.146e-06	0.775455	0.272688	0.00466088	0.109919	0.0239988
SL004783	S100A12	cg22387550	0.00428469	0.00105558	5.8014e-05	-0.000328256	0.000105078	0.00189888	0.00378475	0.0010557	0.000373595	-1.523	0.46653	0.00117954	0.116679	0.0240073
SL008835	ASGR1	cg12262378	0.00378884	0.000825355	5.72401e-06	0.000701135	0.000213653	0.00111123	0.00339818	0.00082722	4.73402e-05	0.557179	0.179209	0.00199434	0.103107	0.024008
SL005156	DAN	cg08235413	0.0103134	0.00102147	9.09315e-22	-0.000206343	5.18663e-05	8.06952e-05	0.0108312	0.00103171	3.11177e-23	2.50911	0.915758	0.00638681	0.0502004	0.0240365
SL000062	PSA	cg23323297	0.0052903	0.00161788	0.00115699	-0.000342128	9.56559e-05	0.000385057	0.00607032	0.00162712	0.000214972	2.27992	0.783961	0.00381206	0.147445	0.0240436
SL000420	Ferritin	cg19312291	0.00836845	0.00229777	0.00030145	-0.000462897	0.000116631	8.37978e-05	0.00720803	0.00232049	0.0020127	-2.50686	0.914097	0.00633785	0.138666	0.024057
SL004726	CD97	cg18366919	0.0031131	0.000591494	2.18485e-07	0.000642899	8.06731e-05	1.29127e-14	0.00362979	0.000628226	1.40503e-08	-0.803688	0.341657	0.0190818	0.165973	0.0240651
SL000414	Factor B	cg18465149	0.00161112	0.000502062	0.00142606	-0.00020198	4.21452e-05	2.23403e-06	0.00189779	0.000511475	0.000232564	1.4193	0.555107	0.010888	0.177932	0.0240803
SL012538	ARMEL	cg12009856	0.00459233	0.000713429	3.08555e-10	-0.000330467	0.000111173	0.00310936	0.00425285	0.000711783	4.64262e-09	-1.02728	0.296641	0.000584512	0.0739237	0.0240979
SL008623	CNTN2	cg22863880	0.00612979	0.000933543	1.403e-10	-0.000160792	5.07889e-05	0.0016493	0.00656922	0.000934234	7.48114e-12	2.73289	0.850263	0.0014008	0.0716869	0.0241022
SL004594	Troponin I, skeletal, fast twitch	cg26656287	0.00700017	0.00153944	6.9748e-06	-0.000246261	6.54064e-05	0.000188264	0.00624144	0.00155143	6.72725e-05	-3.081	1.09391	0.00506609	0.108387	0.0241144
SL000592	TIMP-2	cg25270886	0.00280883	0.000528114	1.6401e-07	-0.000415928	4.83129e-05	1.19908e-16	0.00330342	0.000566572	1.047e-08	1.18913	0.508859	0.0198785	0.176085	0.0241175
SL010449	Carbonic Anhydrase X	cg13360200	0.00151553	0.000638925	0.0181072	-0.000234223	4.15158e-05	2.96217e-08	0.00192892	0.000657257	0.0035068	1.76495	0.717519	0.0142732	0.272771	0.0241455
SL008591	TFF1	cg10654510	0.013346	0.00177516	2.951e-13	-0.000255326	6.01156e-05	2.62222e-05	0.0142771	0.00179789	1.56979e-14	3.64692	1.37074	0.00807572	0.0697703	0.0241517
SL001766	FSH	cg05316627	0.0280648	0.00244188	4.90565e-27	-0.00206685	0.000119319	4.54826e-52	0.032539	0.00312733	6.74818e-23	2.16471	0.951952	0.0234304	0.159422	0.0241565
SL003182	Integrin aVb5	cg06218523	0.00343001	0.000804446	2.44607e-05	-0.000589133	9.84725e-05	4.45444e-09	0.00288318	0.00083106	0.00057177	-0.928199	0.381339	0.0153163	0.159426	0.0241586
SL011888	SMOC1	cg23702412	0.00766922	0.000570717	6.61513e-35	0.000398272	9.90934e-05	6.83453e-05	0.00737848	0.00057671	3.20524e-32	0.72999	0.268121	0.00672617	0.0379093	0.0241891
SL005213	RELT	cg19975933	0.0071169	0.000635777	7.27348e-26	0.000649667	8.8638e-05	1.06002e-12	0.00763122	0.000668812	1.07947e-26	-0.791669	0.334209	0.0182634	0.0722676	0.0241966
SL000316	C4	cg18431489	0.00345375	0.000902977	0.000149105	-0.000333628	6.27931e-05	1.69028e-07	0.00401036	0.0009253	1.80361e-05	1.66835	0.670339	0.0131744	0.16116	0.0242089
SL000316	C4	cg18431489	0.00345375	0.000902977	0.000149105	-0.000333628	6.27931e-05	1.69028e-07	0.00401036	0.0009253	1.80361e-05	1.66835	0.670339	0.0131744	0.16116	0.0242089
SL005200	MICB	cg10308381	0.00502956	0.00119425	3.05953e-05	-0.00026527	4.77267e-05	4.65266e-08	0.00426658	0.0012273	0.000557085	-2.87626	1.16659	0.0140502	0.1517	0.0242127
SL000519	MIP-1a	cg22460710	0.0085858	0.00120074	3.46349e-12	0.000510887	6.65897e-05	1.03404e-13	0.00757373	0.00126956	4.90159e-09	1.98099	0.840236	0.018813	0.117876	0.0242183
SL004351	IL-17E	cg01429391	0.00208913	0.000858421	0.0153278	-0.00046202	0.000106375	1.73018e-05	0.00163236	0.000870313	0.0613489	-0.988649	0.375055	0.00867478	1	0.0242301
SL004671	BAFF Receptor	cg14697880	-0.00315127	0.00101078	0.00193881	-0.000457833	7.31708e-05	9.08242e-10	-0.00386445	0.0010479	0.000253645	-1.55774	0.6449	0.0161099	0.226316	0.0242347
SL000678	Granulysin	cg08563570	0.00543645	0.00107012	5.49814e-07	-0.000478501	6.90988e-05	1.48275e-11	0.00461556	0.00111904	4.41345e-05	-1.71556	0.719982	0.0175904	0.150998	0.0242512
SL008904	LYVE1	cg03655348	0.00276773	0.000738291	0.00020065	-0.000197162	4.45415e-05	1.20166e-05	0.00236839	0.000749264	0.00167825	-2.02548	0.773795	0.00915236	0.144286	0.0242517
SL003785	GAPDH, liver	cg21343895	0.00744038	0.00266461	0.00545254	-0.000430694	6.08079e-05	5.35247e-12	0.0053556	0.00279263	0.0557637	-4.84052	2.03728	0.0179139	1	0.0242837
SL012783	WFKN1	cg02266878	-0.00230958	0.000844852	0.00650562	-0.000346925	6.57367e-05	2.02743e-07	-0.00179312	0.000865305	0.0388044	1.48867	0.597802	0.0131205	0.223615	0.024315
SL004180	CD30	cg22428027	0.00299945	0.000702285	2.36963e-05	-0.000453488	8.40678e-05	1.10704e-07	0.00256222	0.000720295	0.000414172	-0.964145	0.389015	0.0135579	0.145769	0.0243162
SL007631	SOST	cg10624665	0.0147447	0.00102169	3.49585e-39	0.000723407	0.000107242	4.6139e-11	0.0155101	0.00106578	1.0775e-39	-1.05802	0.442897	0.0173048	0.0519088	0.0243326
SL003341	Fibrinogen g-chain dimer	cg00705808	0.00268037	0.0010625	0.0119831	0.000599035	0.000113247	1.90293e-07	0.00333024	0.00108832	0.00234373	-1.08485	0.435933	0.0131806	0.242453	0.0243337
SL004859	GITR	cg04107003	0.00272492	0.00112582	0.015897	-0.000428543	0.000116664	0.000268086	0.00217484	0.0011336	0.0556758	-1.28361	0.450368	0.00457032	1	0.0243345
SL000451	HSP 70	cg02932780	0.00621418	0.000753224	1.69622e-15	-0.000951178	0.000115163	1.58543e-15	0.00689119	0.000803455	1.52538e-16	0.711754	0.304134	0.0196994	0.108945	0.024346
SL000316	C4	cg02054431	0.00345375	0.000902977	0.000149105	-0.000320808	8.87776e-05	0.000335642	0.00389055	0.000908599	2.26233e-05	1.36156	0.473063	0.0041885	0.126471	0.0243641
SL000316	C4	cg02054431	0.00345375	0.000902977	0.000149105	-0.000320808	8.87776e-05	0.000335642	0.00389055	0.000908599	2.26233e-05	1.36156	0.473063	0.0041885	0.126471	0.0243641
SL011448	TNR4	cg10335452	0.00234817	0.000846543	0.00576874	-0.000289981	5.45152e-05	1.64067e-07	0.00182544	0.000867639	0.0359379	-1.80266	0.725465	0.0133221	0.222614	0.0243662
SL005171	IGFBP-4	cg11634198	0.00333642	0.000643607	3.26812e-07	0.000320661	8.12732e-05	9.21639e-05	0.00301322	0.000649865	4.63011e-06	1.00792	0.367828	0.00638114	0.0968706	0.0244083
SL008486	LEG9	cg14592794	0.00615166	0.000787298	3.9279e-14	0.000479182	0.000114234	3.28905e-05	0.00656308	0.000797107	1.97736e-15	-0.858572	0.322003	0.00794351	0.0668782	0.0244341
SL003332	MMP-17	cg07427606	0.00214594	0.000896659	0.0171028	-0.00049013	6.85438e-05	3.45878e-12	0.00285415	0.000940841	0.00255469	1.44495	0.60952	0.0181736	0.330024	0.0244367
SL002525	C2	cg02996364	0.00222251	0.000451497	1.19681e-06	-0.000140017	4.65899e-05	0.00279968	0.00200904	0.000450774	1.04902e-05	-1.52464	0.449152	0.000747926	0.0960514	0.0244397
SL004858	GFRa-1	cg11257689	0.00743201	0.000947093	3.0441e-14	-0.000423902	0.000106578	8.09866e-05	0.00790948	0.000956623	1.50175e-15	1.12637	0.412788	0.00660428	0.0642453	0.0244438
SL008904	LYVE1	cg06504162	0.00276773	0.000738291	0.00020065	-0.000205622	4.19756e-05	1.3457e-06	0.00233991	0.000753105	0.00200894	-2.08064	0.821488	0.0116536	0.154577	0.0244589
SL010451	CFC1	cg03882167	0.00272526	0.00106382	0.0107328	0.000928819	0.000116027	9.91228e-15	0.00179697	0.00113027	0.112558	0.999429	0.426336	0.0194937	1	0.0244648
SL005156	DAN	cg21856670	0.0103134	0.00102147	9.09315e-22	-0.000716825	0.000115802	1.34142e-09	0.00960217	0.00105793	3.41391e-18	-0.992242	0.410902	0.0161377	0.0689648	0.0244699
SL004726	CD97	cg09470638	0.0031131	0.000591494	2.18485e-07	0.000544985	8.68613e-05	8.17839e-10	0.00269653	0.000613273	1.36821e-05	0.764366	0.317223	0.0163682	0.133811	0.0244885
SL000507	Lymphotoxin a1/b2	cg23893346	-0.00313023	0.000605886	3.57809e-07	-0.000474317	6.58092e-05	2.38756e-12	-0.00264796	0.000636326	3.78581e-05	1.01678	0.429449	0.0183207	0.15407	0.0244887
SL000507	Lymphotoxin a1/b2	cg23893346	-0.00313023	0.000605886	3.57809e-07	-0.000474317	6.58092e-05	2.38756e-12	-0.00264796	0.000636326	3.78581e-05	1.01678	0.429449	0.0183207	0.15407	0.0244887
SL014129	H6ST1	cg22529396	0.00162972	0.000412872	9.14699e-05	-0.000393251	6.01045e-05	1.61889e-10	0.00193042	0.000429522	8.85459e-06	0.764651	0.319332	0.0170435	0.184511	0.0245337
SL004821	S100A4	cg09373211	0.00224545	0.000907372	0.0136977	-0.000176749	2.98779e-05	6.48345e-09	0.00285258	0.000936457	0.00245242	3.43496	1.41305	0.0154464	0.270381	0.0245471
SL005201	MIS	cg02091605	0.00194449	0.000336711	1.42943e-08	0.000524251	7.75871e-05	4.33565e-11	0.00169129	0.000351428	2.03292e-06	0.482986	0.202634	0.0175581	0.130217	0.0245898
SL000440	Hemopexin	cg22443982	0.00569168	0.00179685	0.00163982	0.000602164	8.94651e-05	5.0625e-11	0.00703235	0.00187406	0.000197649	-2.22641	0.933717	0.0175115	0.235548	0.0246028
SL000519	MIP-1a	cg24325790	0.0085858	0.00120074	3.46349e-12	0.000204849	3.6837e-05	4.57698e-08	0.00782166	0.00123399	5.59251e-10	3.73022	1.51809	0.0143756	0.0889995	0.0246052
SL009045	ENPP7	cg26017754	0.00535713	0.00178297	0.00280503	-0.000458074	5.86209e-05	3.82211e-14	0.00383686	0.00188884	0.0427988	-3.31883	1.41427	0.0193681	0.283784	0.0246073
SL000283	b2-Microglobulin	cg21954370	0.0108023	0.000662523	1.93329e-47	-0.000286276	7.50169e-05	0.000154204	0.0104759	0.000668096	1.24711e-44	-1.14022	0.410118	0.00565703	0.0302174	0.0246332
SL018256	CHKB	cg12404590	-0.0118553	0.00115612	2.43005e-22	-0.000500352	9.2497e-05	1.02296e-07	-0.0111359	0.00118603	2.91551e-19	1.43779	0.582074	0.0138726	0.0606821	0.0246438
SL005209	Notch-3	cg13656062	0.00591009	0.000566208	5.08519e-23	-0.000139409	3.84031e-05	0.00031529	0.00563724	0.000569855	4.93251e-21	-1.95713	0.684331	0.00443192	0.0461654	0.024672
SL005158	DC-SIGNR	cg10757188	0.00235007	0.000395417	5.5487e-09	-9.58654e-05	2.80194e-05	0.000678977	0.00253694	0.000397046	4.1134e-10	1.94929	0.654533	0.00305456	0.0795168	0.024682
SL004645	HAI-1	cg04034458	-0.00517781	0.000784259	1.13881e-10	-0.000252567	6.24085e-05	6.10207e-05	-0.00557812	0.000792844	7.41259e-12	-1.58495	0.587009	0.0071937	0.077312	0.0247008
SL000308	C1-Esterase Inhibitor	cg06200697	0.00324786	0.000727719	1.01881e-05	-0.000371119	0.000101699	0.000293412	0.00359913	0.00073256	1.25204e-06	0.946523	0.332149	0.00457428	0.108155	0.024704
SL002684	CSF-1	cg00865962	0.00316027	0.000726803	1.69535e-05	-0.000114203	3.97294e-05	0.00423596	0.00350814	0.000723932	1.73252e-06	3.04599	0.846588	0.000355975	0.110073	0.024717
SL003184	sLeptin R	cg20301308	0.00473148	0.00175927	0.00741871	0.000611925	0.000136749	9.66619e-06	0.00568064	0.00178624	0.00157195	-1.55111	0.598063	0.00980433	0.200606	0.0248384
SL000316	C4	cg13961400	0.00345375	0.000902977	0.000149105	-0.000605621	7.23645e-05	7.20855e-16	0.0042749	0.000965308	1.19009e-05	1.35588	0.582162	0.0202947	0.237756	0.0248468
SL000316	C4	cg13961400	0.00345375	0.000902977	0.000149105	-0.000605621	7.23645e-05	7.20855e-16	0.0042749	0.000965308	1.19009e-05	1.35588	0.582162	0.0202947	0.237756	0.0248468
SL005102	SHBG	cg08460590	0.00429326	0.00120378	0.000399889	-0.000331481	7.08594e-05	3.81849e-06	0.00496209	0.00122482	5.98487e-05	2.01769	0.789055	0.0108768	0.155785	0.0248474
SL010519	ZAP70	cg15831060	0.00425238	0.000835343	5.23873e-07	-0.000473208	0.000102669	5.26405e-06	0.00471358	0.000849445	4.89621e-08	0.974611	0.379523	0.0105486	0.108455	0.0248776
SL000507	Lymphotoxin a1/b2	cg09804616	-0.00313023	0.000605886	3.57809e-07	-0.000421241	8.1348e-05	3.36934e-07	-0.00349419	0.000619956	3.05703e-08	-0.864019	0.347195	0.0131833	0.116273	0.0248972
SL000507	Lymphotoxin a1/b2	cg09804616	-0.00313023	0.000605886	3.57809e-07	-0.000421241	8.1348e-05	3.36934e-07	-0.00349419	0.000619956	3.05703e-08	-0.864019	0.347195	0.0131833	0.116273	0.0248972
SL005171	IGFBP-4	cg09923456	0.00333642	0.000643607	3.26812e-07	-0.000161423	4.55475e-05	0.000434563	0.00364304	0.000647179	3.16925e-08	1.89947	0.655714	0.00395136	0.0919003	0.0249037
SL005214	Semaphorin-6A	cg19556613	0.000994377	0.000408808	0.0153837	-0.000561083	7.76296e-05	2.08319e-12	0.000669573	0.000429446	0.119654	-0.578888	0.245384	0.0187406	1	0.0249182
SL003328	Factor I	cg01087991	0.00288155	0.000441516	1.79569e-10	-0.000513729	0.000173908	0.00329871	0.00267358	0.000440501	2.70729e-09	-0.40482	0.117498	0.00062321	0.0721722	0.0249235
SL005215	Siglec-3	cg10129493	0.00357818	0.00103526	0.000598896	0.000259704	9.8812e-05	0.00887182	0.00411583	0.00102363	6.78801e-05	-2.07025	0.481488	2.09415e-05	0.150258	0.0249298
SL008623	CNTN2	cg11251293	0.00612979	0.000933543	1.403e-10	-0.00021463	4.13418e-05	3.14103e-07	0.00668971	0.000955231	8.98845e-12	2.60876	1.04923	0.0132616	0.0913438	0.0249317
SL000316	C4	cg18909389	0.00345375	0.000902977	0.000149105	-0.000314351	9.47491e-05	0.000980352	0.0038772	0.000905655	2.27038e-05	1.34706	0.442783	0.00248426	0.122605	0.024944
SL000316	C4	cg18909389	0.00345375	0.000902977	0.000149105	-0.000314351	9.47491e-05	0.000980352	0.0038772	0.000905655	2.27038e-05	1.34706	0.442783	0.00248426	0.122605	0.024944
SL000316	C4	cg08972588	0.00345375	0.000902977	0.000149105	-0.0011662	0.000149448	4.17049e-14	0.00422325	0.000956804	1.26987e-05	0.659832	0.281873	0.01967	0.2228	0.0249503
SL000316	C4	cg08972588	0.00345375	0.000902977	0.000149105	-0.0011662	0.000149448	4.17049e-14	0.00422325	0.000956804	1.26987e-05	0.659832	0.281873	0.01967	0.2228	0.0249503
SL000089	TGF-b3	cg04407490	0.0021896	0.000782384	0.00535016	-0.000363675	7.53853e-05	1.92091e-06	0.00174421	0.000797417	0.029228	-1.22468	0.483683	0.011678	0.20341	0.0249643
SL004845	EphB4	cg23276878	-0.00326883	0.000801903	5.39764e-05	0.000154496	3.03919e-05	5.41901e-07	-0.00279472	0.000819618	0.000708043	-3.0687	1.22858	0.0128499	0.145037	0.024976
SL005190	ILT-2	cg12161905	0.00269133	0.00077687	0.000581563	-0.000447172	8.6368e-05	3.37329e-07	0.00315607	0.000794797	8.31482e-05	1.03929	0.417945	0.0132506	0.172681	0.024991
SL005214	Semaphorin-6A	cg11036833	0.000994377	0.000408808	0.0153837	0.000385001	5.27901e-05	1.35079e-12	0.00066745	0.00042986	0.121186	0.849159	0.360857	0.0190386	1	0.0251244
SL000089	TGF-b3	cg00327772	0.0021896	0.000782384	0.00535016	-0.000323517	7.47453e-05	1.84951e-05	0.00260232	0.000793249	0.00111572	1.27574	0.487594	0.00918258	0.188493	0.0251499
SL017328	MYPC1	cg02823066	0.00760276	0.00180496	3.04698e-05	-0.000473362	9.29288e-05	5.13849e-07	0.00653785	0.00184491	0.000435115	-2.24968	0.902455	0.0130254	0.140069	0.02515
SL004672	BCMA	cg01281993	0.00393033	0.000664403	6.48892e-09	-0.000521246	6.0148e-05	7.81024e-17	0.00330909	0.000713515	4.60788e-06	-1.19183	0.514263	0.0209155	0.158062	0.0251641
SL005200	MICB	cg16372051	0.00502956	0.00119425	3.05953e-05	-0.00061249	0.000135372	7.73643e-06	0.00438108	0.00121333	0.000339299	-1.05876	0.411044	0.0103165	0.128934	0.0251912
SL004125	IR	cg04312604	0.00255927	0.000631861	6.00753e-05	-0.000448793	0.000112609	7.83886e-05	0.00287574	0.000638351	8.44557e-06	0.705161	0.260682	0.00708478	0.123657	0.0252079
SL009045	ENPP7	cg05654197	0.00535713	0.00178297	0.00280503	-4.85498e-05	1.98398e-05	0.0147763	0.00426388	0.00173924	0.0145964	-22.5182	4.06975	5.30809e-08	0.204075	0.0252221
SL005200	MICB	cg12843528	0.00502956	0.00119425	3.05953e-05	-0.000230542	6.18294e-05	0.000216763	0.00445013	0.00120338	0.000243867	-2.51334	0.898805	0.00538832	0.115205	0.0252793
SL008835	ASGR1	cg12219789	0.00378884	0.000825355	5.72401e-06	-0.000631952	8.53392e-05	6.38207e-13	0.00445719	0.000869288	4.35367e-07	1.05759	0.450686	0.0193719	0.176399	0.0252864
SL012517	RSPO4	cg08443357	0.0117264	0.00104032	3.59227e-26	-0.000494081	8.29896e-05	5.23507e-09	0.0110308	0.00107425	2.15938e-22	-1.40799	0.583313	0.0161813	0.0593241	0.0252919
SL005230	UNC5H3	cg19522940	0.00781083	0.000606199	1.26844e-32	0.000474423	9.04953e-05	2.42567e-07	0.00817641	0.000620697	8.28638e-34	-0.77058	0.311612	0.0137663	0.0468044	0.0253155
SL005172	IGFBP-6	cg05242244	0.00755524	0.000703482	3.82194e-24	-0.0010164	6.69631e-05	1.98297e-42	0.00867955	0.000858916	8.46722e-22	1.10616	0.489231	0.0242282	0.148812	0.0253289
SL005173	IL-10 Ra	cg04563671	0.00233681	0.000465393	7.37574e-07	-0.000266332	5.65242e-05	3.2633e-06	0.00207773	0.000473744	1.43676e-05	-0.972777	0.382869	0.0113917	0.11087	0.0253292
SL005699	Apo L1	ch.22.528917R	-0.00373264	0.000855238	1.57869e-05	-0.000482995	7.01112e-05	1.8783e-11	-0.00308285	0.000894234	0.000618551	1.34533	0.569003	0.0184807	0.174083	0.0253306
SL016128	TXD12	cg18755643	0.00434144	0.000788744	6.19704e-08	-0.000441312	6.66781e-05	1.02068e-10	0.00491934	0.000821586	4.32551e-09	1.3095	0.55115	0.0179178	0.133112	0.025338
SL018946	UB2G2	cg08031958	0.00397553	0.000668281	5.38202e-09	0.000443155	0.000148509	0.00299752	0.00366368	0.000667204	6.65304e-08	0.70371	0.208365	0.000794883	0.0784429	0.0253384
SL004843	Ephrin-A2	cg27106726	0.00445075	0.000487123	2.14635e-18	-0.000175989	3.51772e-05	8.08721e-07	0.00416654	0.000497504	6.97552e-16	-1.61497	0.646182	0.0127985	0.0638581	0.0253653
SL004516	MBL	cg13882988	0.00435365	0.00144845	0.00279558	-0.000569252	7.47762e-05	1.55685e-13	0.00555527	0.00153026	0.000315271	2.11088	0.902693	0.0197976	0.276003	0.025395
SL004153	M-CSF R	cg25613180	0.00315572	0.000731261	1.95386e-05	-0.000375614	8.22289e-05	6.34475e-06	0.00355379	0.000743254	2.35309e-06	1.05979	0.413485	0.0106953	0.126143	0.025402
SL004362	SCGF-alpha	cg20308817	0.00342982	0.00091736	0.00020837	-0.000261108	0.000103037	0.0116062	0.00292604	0.000902818	0.00127829	-1.92939	0.407021	2.85732e-06	0.146882	0.0254298
SL000451	HSP 70	cg17879299	0.00621418	0.000753224	1.69622e-15	0.000815422	0.000146539	4.47981e-08	0.00668933	0.000774097	9.39951e-17	-0.582701	0.238893	0.0151006	0.0764618	0.0254849
SL001729	G-CSF	cg16276850	0.0020619	0.000708174	0.00377332	0.000793845	0.0001405	2.83397e-08	0.00160764	0.000728716	0.0278765	0.572224	0.235287	0.0154013	0.22031	0.0254916
SL004180	CD30	cg06868562	0.00299945	0.000702285	2.36963e-05	0.000111146	3.68132e-05	0.00267678	0.00267331	0.000701598	0.000157865	2.9344	0.883698	0.000970557	0.108735	0.0254924
SL006119	TFF3	cg18749097	0.00965769	0.000817713	3.00979e-28	-0.000192845	5.32117e-05	0.000322827	0.0100496	0.000823106	7.91512e-30	2.03227	0.716462	0.00476554	0.0405803	0.0255028
SL003066	PEDF	cg18403478	0.00245857	0.000440429	4.08245e-08	-0.000278292	6.70598e-05	3.96929e-05	0.00223321	0.000445734	7.79724e-07	-0.809815	0.305549	0.0083208	0.0916649	0.0255038
SL005200	MICB	cg21506565	0.00502956	0.00119425	3.05953e-05	-0.000660485	0.00019103	0.000596475	0.00559121	0.00119991	4.16778e-06	0.850359	0.290677	0.00361205	0.11167	0.0255304
SL004579	Macrophage mannose receptor	cg24855045	0.00809448	0.000593677	9.07199e-36	-0.000457928	8.06503e-05	2.42412e-08	0.00771392	0.000610957	1.47107e-31	-0.83105	0.342138	0.0155254	0.0470149	0.0255341
SL007674	LY9	cg19718360	0.00223361	0.000754654	0.00323832	-0.000493765	8.03453e-05	1.73407e-09	0.00171683	0.000781117	0.0284561	-1.04661	0.436633	0.0169306	0.231365	0.0255394
SL004858	GFRa-1	cg26678605	0.00743201	0.000947093	3.0441e-14	0.000524737	6.35579e-05	1.63225e-15	0.00658765	0.00101044	1.87285e-10	1.60911	0.693735	0.0208094	0.113611	0.0255465
SL000316	C4	cg06347181	0.00345375	0.000902977	0.000149105	-0.00017572	3.66922e-05	2.27095e-06	0.00396245	0.000920041	2.03121e-05	2.89489	1.14696	0.0119439	0.147286	0.025559
SL000316	C4	cg06347181	0.00345375	0.000902977	0.000149105	-0.00017572	3.66922e-05	2.27095e-06	0.00396245	0.000920041	2.03121e-05	2.89489	1.14696	0.0119439	0.147286	0.025559
SL005230	UNC5H3	cg05012356	0.00781083	0.000606199	1.26844e-32	-0.000428815	6.11376e-05	8.38919e-12	0.00827698	0.000634842	3.02059e-33	1.08707	0.461529	0.018927	0.0596802	0.02556
SL019019	PIANP	cg08431529	0.00297895	0.000717388	3.92765e-05	0.00017807	5.10387e-05	0.000532172	0.00331713	0.000721047	5.47681e-06	-1.89914	0.65362	0.00384502	0.113523	0.0255684
SL000039	IL-8	cg19003412	0.00496258	0.00100277	1.05447e-06	-0.000188649	4.31751e-05	1.54614e-05	0.00549388	0.00101725	1.07496e-07	2.81634	1.08438	0.00970581	0.107061	0.0255781
SL000064	Kallikrein 7	cg13670833	-0.0039735	0.000825654	2.02678e-06	0.00049064	8.44975e-05	1.19339e-08	-0.00343462	0.000851013	6.37584e-05	-1.09832	0.454187	0.0159868	0.135619	0.025591
SL005200	MICB	cg07739478	0.00502956	0.00119425	3.05953e-05	-0.000667672	0.000138329	1.89838e-06	0.00570599	0.00121732	3.66523e-06	1.01312	0.402386	0.0121529	0.134491	0.025594
SL004145	HVEM	cg09044743	0.00272435	0.00071403	0.00015476	-0.000160689	3.3399e-05	2.04527e-06	0.00232049	0.000727733	0.00152841	-2.51327	0.997498	0.0120927	0.148239	0.0256132
SL005200	MICB	cg03658690	0.00502956	0.00119425	3.05953e-05	-0.000600741	0.000132326	7.21621e-06	0.00567692	0.0012136	3.83234e-06	1.0776	0.420538	0.0107159	0.12871	0.0256476
SL007674	LY9	cg00006397	0.00223361	0.000754654	0.00323832	-0.000390396	5.65047e-05	1.64024e-11	0.001662	0.000789089	0.0357294	-1.46417	0.620983	0.0188028	0.255912	0.0256505
SL002525	C2	cg03694466	0.00222251	0.000451497	1.19681e-06	-0.000655374	0.000156717	3.46912e-05	0.00199048	0.000457107	1.64976e-05	-0.354045	0.134186	0.00861445	0.104401	0.0256513
SL010471	Testican-2	cg08251248	-0.0018078	0.000591953	0.00239149	0.000292064	8.24618e-05	0.000438576	-0.00208856	0.000595346	0.000496392	0.961299	0.334608	0.00425853	0.155305	0.0256686
SL008486	LEG9	cg11433672	0.00615166	0.000787298	3.9279e-14	0.000808279	0.000172003	3.47161e-06	0.00659016	0.000801504	2.14766e-15	-0.542502	0.214015	0.0115855	0.0712804	0.0256816
SL011069	Marapsin	cg16559302	-0.00445248	0.000681585	1.73778e-10	0.000114619	3.42202e-05	0.000877236	-0.00413489	0.000684	3.12205e-09	-2.77081	0.926712	0.00294231	0.0713281	0.025713
SL003300	HCC-4	cg24382686	0.00776231	0.000935563	1.21686e-15	0.000525267	8.96089e-05	8.79324e-09	0.00714617	0.000965087	6.42358e-13	1.173	0.48636	0.0162689	0.0793758	0.0257216
SL000382	CK-MB	cg05321721	-0.00766185	0.00165003	4.4849e-06	-0.000241845	6.28042e-05	0.000134545	-0.00846933	0.00166481	5.31793e-07	-3.33886	1.22035	0.00646219	0.10539	0.0257247
SL003703	BFL1	cg20973720	0.00278461	0.000777311	0.000377291	0.000491676	7.10123e-05	1.50811e-11	0.00219251	0.000813255	0.00727976	1.20426	0.511173	0.0189048	0.212634	0.0257278
SL000344	Cathepsin D	cg16263801	0.00726572	0.00112617	2.85095e-10	-0.00018437	4.81142e-05	0.00014514	0.00671306	0.00113615	6.80742e-09	-2.99753	1.09308	0.00634424	0.0760633	0.0257439
SL000062	PSA	cg02957799	0.0052903	0.00161788	0.00115699	-0.000395411	6.08353e-05	2.10589e-10	0.00645094	0.00168236	0.000143489	2.9353	1.23643	0.0180086	0.219392	0.0257529
SL007173	GRN	cg20647418	0.00157572	0.000535651	0.00343083	0.000232946	5.84211e-05	7.78195e-05	0.00130823	0.000541234	0.0160366	1.14829	0.426925	0.0074159	0.169756	0.0257611
SL006924	ART	cg01872947	-0.00377746	0.000646691	9.85121e-09	-0.000322113	8.2449e-05	0.000107653	-0.00345887	0.000652868	1.82638e-07	0.989072	0.364375	0.00689057	0.0843406	0.0258012
SL000695	Lipocalin 2	cg22438810	0.00454718	0.000559148	4.00076e-15	-0.000422079	8.86041e-05	2.55757e-06	0.00423476	0.000569532	5.202e-13	-0.740194	0.293483	0.012005	0.0687062	0.0258158
SL004594	Troponin I, skeletal, fast twitch	cg04069951	0.00700017	0.00153944	6.9748e-06	0.000503268	0.000119322	2.97764e-05	0.00779334	0.00155914	8.25876e-07	-1.57603	0.600305	0.00894674	0.113306	0.0258234
SL000316	C4	cg21370522	0.00345375	0.000902977	0.000149105	-0.000795437	9.33696e-05	2.37243e-16	0.0042826	0.000967734	1.20685e-05	1.042	0.45124	0.0213809	0.239984	0.0258293
SL000316	C4	cg21370522	0.00345375	0.000902977	0.000149105	-0.000795437	9.33696e-05	2.37243e-16	0.0042826	0.000967734	1.20685e-05	1.042	0.45124	0.0213809	0.239984	0.0258293
SL003785	GAPDH, liver	cg06947082	0.00744038	0.00266461	0.00545254	0.000133739	2.68768e-05	9.20157e-07	0.00590467	0.00272025	0.0304729	11.4829	4.60644	0.0130272	0.206403	0.0258296
SL004363	SCGF-alpha	cg20308817	0.00377795	0.00100635	0.000196402	-0.000261108	0.000103037	0.0116062	0.00323177	0.000990968	0.0011925	-2.09178	0.446762	3.75107e-06	0.144571	0.0258387
SL000414	Factor B	cg04755523	0.00161112	0.000502062	0.00142606	-0.000582364	9.86954e-05	7.07972e-09	0.00194361	0.000518196	0.000199144	0.570924	0.237236	0.0165016	0.206369	0.0258565
SL001992	TNF sR-I	cg23727813	0.00973906	0.00065273	2.78778e-41	-0.000364827	7.14081e-05	4.76955e-07	0.00935479	0.000667414	2.33732e-37	-1.05331	0.425675	0.013708	0.0394571	0.0259476
SL004915	NCC27	cg25588725	-0.0071386	0.00266416	0.0076389	-7.72815e-05	2.86974e-05	0.00734145	-0.00583267	0.0026432	0.0278336	16.8984	4.27015	8.78535e-05	0.182939	0.0259893
SL002525	C2	cg27323011	0.00222251	0.000451497	1.19681e-06	-0.000147069	3.52361e-05	3.58991e-05	0.00245338	0.000457096	1.27723e-07	1.5698	0.596837	0.00882337	0.103877	0.0260663
SL005430	SECTM1	cg22476252	0.00491231	0.000644944	1.52655e-13	-0.000461101	5.86121e-05	2.68027e-14	0.00546204	0.000684206	1.18536e-14	1.1922	0.513951	0.0208025	0.111907	0.0260838
SL007206	TSP2	cg22971600	0.00628702	0.000910142	1.65862e-11	-0.00046386	7.32494e-05	5.77116e-10	0.00564954	0.000944445	4.46297e-09	-1.3743	0.578296	0.0178917	0.101396	0.0260848
SL001990	IL-1Ra	cg05240855	0.00383632	0.000893455	2.1472e-05	0.000199724	4.60424e-05	1.77313e-05	0.00336891	0.000906042	0.000225618	2.3403	0.903082	0.00986401	0.121839	0.0261015
SL012783	WFKN1	cg02729269	-0.00230958	0.000844852	0.00650562	-0.000603682	7.79445e-05	6.2171e-14	-0.00160213	0.000894302	0.0738778	1.17189	0.504614	0.0206539	1	0.0261152
SL005200	MICB	cg07014308	0.00502956	0.00119425	3.05953e-05	-0.00057384	0.000175148	0.00113212	0.00558024	0.00119755	4.16683e-06	0.959646	0.316825	0.00259402	0.109489	0.0261413
SL004859	GITR	cg16252905	0.00272492	0.00112582	0.015897	-0.000301997	6.72524e-05	9.03138e-06	0.00211986	0.00114365	0.0644505	-2.00352	0.782598	0.0107892	1	0.0261455
SL003872	gp130, soluble	cg04075035	0.0028064	0.000418181	5.7399e-11	0.000166798	4.62881e-05	0.00034848	0.00260867	0.000420874	1.27906e-09	1.18544	0.419412	0.00491385	0.0704563	0.0261529
SL018548	a1-Antichymotrypsin	cg01976623	0.00337759	0.00064868	2.91427e-07	0.00076572	0.000184275	3.88135e-05	0.0030471	0.000656609	4.55115e-06	0.43161	0.163964	0.00876851	0.0978486	0.0261683
SL003869	MIC-1	cg16008327	0.0201903	0.000917482	1.02735e-73	-0.000472155	6.40424e-05	7.92036e-13	0.0194562	0.000965834	5.08512e-65	-1.55495	0.666921	0.02016	0.0363628	0.0262145
SL021043	GDF-11/8	cg03847895	-0.00209967	0.000713193	0.00340505	-0.000544559	0.000118686	5.78577e-06	-0.00248676	0.000725144	0.000660179	-0.710824	0.279731	0.0113815	0.184356	0.0262195
SL000588	TMA	cg19585646	0.00227991	0.000913479	0.0129199	-0.000425339	8.91623e-05	2.48369e-06	0.00176863	0.000930704	0.0580278	-1.20206	0.478562	0.0123586	1	0.0262465
SL000309	C1q	cg23664396	0.00273913	0.00108282	0.011757	0.000412292	0.000106548	0.000125094	0.00220777	0.00109293	0.0439688	1.28878	0.474678	0.00688044	0.193987	0.0262467
SL000309	C1q	cg23664396	0.00273913	0.00108282	0.011757	0.000412292	0.000106548	0.000125094	0.00220777	0.00109293	0.0439688	1.28878	0.474678	0.00688044	0.193987	0.0262467
SL000309	C1q	cg23664396	0.00273913	0.00108282	0.011757	0.000412292	0.000106548	0.000125094	0.00220777	0.00109293	0.0439688	1.28878	0.474678	0.00688044	0.193987	0.0262467
SL004126	4-1BB	cg07145988	0.00341222	0.000769818	1.16934e-05	0.000882865	8.66497e-05	4.29423e-22	0.00424668	0.000849399	8.22569e-07	-0.945175	0.41505	0.0232362	0.244551	0.0262546
SL004016	CXCL16, soluble	cg18056600	0.00374449	0.00051959	2.40083e-12	0.000699798	0.000118912	7.7283e-09	0.00408674	0.000536205	1.47562e-13	-0.48907	0.203785	0.0167998	0.0914011	0.0262661
SL000414	Factor B	cg23164535	0.00161112	0.000502062	0.00142606	-0.000584112	8.18618e-05	3.83282e-12	0.00200194	0.000526827	0.000164417	0.669076	0.28612	0.0197974	0.242573	0.0262731
SL000414	Factor B	cg06169557	0.00161112	0.000502062	0.00142606	-0.000296196	6.51972e-05	7.11126e-06	0.00188177	0.000510258	0.000253514	0.913729	0.358857	0.0112189	0.167984	0.0263404
SL000451	HSP 70	cg16936944	0.00621418	0.000753224	1.69622e-15	0.000310801	5.85817e-05	1.75406e-07	0.00666835	0.000771839	9.53445e-17	-1.46129	0.597559	0.0148441	0.0730861	0.0263599
SL004645	HAI-1	cg07431199	-0.00517781	0.000784259	1.13881e-10	0.000538036	5.72704e-05	2.85689e-19	-0.00596622	0.000853437	9.89292e-12	1.46535	0.641121	0.0227406	0.152267	0.0263629
SL005215	Siglec-3	cg04588972	0.00357818	0.00103526	0.000598896	-9.45313e-05	2.77795e-05	0.000725494	0.00309863	0.00103971	0.00303398	-5.07299	1.73085	0.00354965	0.134022	0.0263671
SL005213	RELT	cg00211630	0.0071169	0.000635777	7.27348e-26	0.000764485	9.84757e-05	5.49989e-14	0.00765002	0.000673268	1.65119e-26	-0.697357	0.3009	0.0209153	0.0749089	0.0263695
SL003190	MIP-5	cg10863207	0.00636376	0.000879492	1.97545e-12	-0.000440625	9.73721e-05	7.70867e-06	0.00589161	0.000893654	1.19928e-10	-1.07155	0.42045	0.0111435	0.0741939	0.0263769
SL005200	MICB	cg24239961	0.00502956	0.00119425	3.05953e-05	-0.00116733	0.000141156	1.49073e-15	0.00396724	0.00127483	0.00197575	-0.910044	0.394767	0.0216017	0.211216	0.0263778
SL005115	Spondin-1	cg16148674	0.00796517	0.000626428	6.33753e-32	-0.000149802	3.89132e-05	0.000135147	0.00826967	0.000632102	1.96541e-33	2.03268	0.747829	0.00681585	0.0382288	0.0263908
SL000507	Lymphotoxin a1/b2	cg19997861	-0.00313023	0.000605886	3.57809e-07	-0.000374847	0.000123213	0.00248386	-0.00340787	0.000605701	3.22499e-08	-0.740672	0.228151	0.00125519	0.088696	0.0264275
SL000507	Lymphotoxin a1/b2	cg19997861	-0.00313023	0.000605886	3.57809e-07	-0.000374847	0.000123213	0.00248386	-0.00340787	0.000605701	3.22499e-08	-0.740672	0.228151	0.00125519	0.088696	0.0264275
SL000062	PSA	cg15418980	0.0052903	0.00161788	0.00115699	0.000126078	3.8384e-05	0.00109939	0.00603141	0.0016226	0.000226496	-5.87824	1.95242	0.00275037	0.14009	0.0264563
SL012168	LIN7B	cg26362197	0.00260066	0.000942678	0.00603468	-0.000877668	0.000224713	0.000108158	0.00306252	0.00095179	0.00138475	0.526237	0.195112	0.00725442	0.177594	0.0264625
SL003182	Integrin aVb5	cg18011163	0.00343001	0.000804446	2.44607e-05	0.000317928	5.74318e-05	5.25027e-08	0.00393363	0.000826731	2.63265e-06	-1.58406	0.653883	0.0158038	0.146826	0.0264642
SL007871	Cytidylate kinase	cg00508158	-0.00214624	0.000794352	0.0071525	-0.000303564	4.68169e-05	2.32947e-10	-0.00157875	0.000826095	0.0566205	1.86943	0.791462	0.0185983	1	0.0264646
SL011809	XTP3A	cg27295595	0.0047245	0.000700749	4.75873e-11	0.000512088	0.000114251	9.36811e-06	0.00509877	0.000711768	3.20515e-12	-0.730872	0.286119	0.0109623	0.0792192	0.0264655
SL004852	B7-H1	cg13461890	0.00358646	0.001321	0.00688007	0.000581533	0.0001053	5.61953e-08	0.00276308	0.00135724	0.0423476	1.41587	0.584365	0.0157856	0.229579	0.026502
SL008904	LYVE1	cg13499067	0.00276773	0.000738291	0.00020065	-0.000203901	3.33097e-05	2.01169e-09	0.00226487	0.000764292	0.00320378	-2.46624	1.03605	0.0177063	0.18169	0.0265154
SL003190	MIP-5	cg09730211	0.00636376	0.000879492	1.97545e-12	-0.000147653	2.75424e-05	1.31787e-07	0.00582859	0.000901913	2.65522e-10	-3.62456	1.48733	0.015194	0.0840975	0.0265212
SL000451	HSP 70	cg07979747	0.00621418	0.000753224	1.69622e-15	0.000430449	7.52447e-05	1.91857e-08	0.00669621	0.000775623	9.99156e-17	-1.11984	0.465324	0.0164988	0.0775698	0.0265358
SL004298	granzyme A	cg27622405	0.00349307	0.00064455	9.69641e-08	-6.37055e-05	2.02683e-05	0.00178041	0.00319924	0.000645297	1.00747e-06	-4.61239	1.47347	0.00185843	0.0841192	0.0265569
SL002525	C2	cg13964363	0.00222251	0.000451497	1.19681e-06	-0.000344389	6.37218e-05	1.05019e-07	0.00249925	0.000463268	1.10631e-07	0.803572	0.330391	0.0153935	0.124517	0.0265587
SL005191	ILT-4	cg12129596	0.00469515	0.000647034	1.72262e-12	-0.00038196	5.31219e-05	2.66617e-12	0.00418971	0.000679433	1.54246e-09	-1.3233	0.567635	0.0201759	0.107653	0.0265817
SL001774	FABP	cg09684338	0.0105244	0.000930324	2.50295e-26	0.000886039	6.62964e-05	1.27485e-34	0.00922227	0.00109233	4.16419e-16	1.46958	0.653533	0.0250103	0.123723	0.026589
SL010369	Carbonic Anhydrase IV	cg26297547	0.00452943	0.000664834	3.04249e-11	0.000342048	5.40063e-05	5.76245e-10	0.00499438	0.000690039	1.95981e-12	-1.3593	0.574218	0.0183405	0.10265	0.0265956
SL009045	ENPP7	cg24253464	0.00535713	0.00178297	0.00280503	-0.000127612	4.87972e-05	0.00921317	0.00446184	0.00176474	0.0117963	-7.01577	1.67739	3.45672e-05	0.167122	0.0265965
SL001766	HCG	cg12253200	0.0280648	0.00244188	4.90565e-27	-0.000265169	2.68912e-05	6.28181e-21	0.0306136	0.00267645	8.1537e-27	9.6119	4.22386	0.0233309	0.0908176	0.0265998
SL007237	MP2K4	cg18156845	0.00214826	0.000890253	0.0162106	0.000117762	4.01568e-05	0.00353067	0.00173935	0.000888473	0.0508771	3.47237	1.02537	0.000769259	1	0.0266316
SL009045	ENPP7	cg02234613	0.00535713	0.00178297	0.00280503	-0.000277616	5.13016e-05	1.00999e-07	0.0042674	0.00182932	0.0200928	-3.92534	1.61535	0.0154818	0.203418	0.0266383
SL000343	Cathepsin B	cg20902975	0.00530598	0.000766836	1.54044e-11	-0.000651419	9.73143e-05	6.38167e-11	0.00474467	0.000799609	5.86415e-09	-0.861664	0.366802	0.0192434	0.105787	0.0266506
SL000316	C4	cg08624648	0.00345375	0.000902977	0.000149105	-0.000841761	0.000293954	0.00438238	0.0030345	0.000900011	0.000811147	-0.498065	0.14226	0.000509194	0.12139	0.0266518
SL000316	C4	cg08624648	0.00345375	0.000902977	0.000149105	-0.000841761	0.000293954	0.00438238	0.0030345	0.000900011	0.000811147	-0.498065	0.14226	0.000509194	0.12139	0.0266518
SL007696	C1QR1	cg15210427	0.00307146	0.000573058	1.32454e-07	-0.00065031	8.28877e-05	3.07665e-14	0.00355514	0.000607555	9.31045e-09	0.743778	0.321883	0.0212944	0.157478	0.0266525
SL004915	NCC27	cg19195712	-0.0071386	0.00266416	0.0076389	-0.00121858	0.000155247	2.98743e-14	-0.00489146	0.00282436	0.0839691	1.84407	0.798097	0.0213006	1	0.0266546
SL005200	MICB	cg08732684	0.00502956	0.00119425	3.05953e-05	-0.000184	5.16218e-05	0.000403262	0.00558995	0.0012016	4.31651e-06	3.04557	1.07631	0.00486684	0.111418	0.0266786
SL000678	Granulysin	cg10075284	0.00543645	0.00107012	5.49814e-07	-0.000152255	3.31774e-05	5.75532e-06	0.00485909	0.00108804	1.00594e-05	-3.79207	1.49833	0.0117128	0.106202	0.0266789
SL004594	Troponin I, skeletal, fast twitch	cg12901038	0.00700017	0.00153944	6.9748e-06	-0.000161984	4.64863e-05	0.000540579	0.00628442	0.00154755	5.756e-05	-4.41863	1.53861	0.00427169	0.102247	0.0266802
SL005200	MICB	cg22937462	0.00502956	0.00119425	3.05953e-05	-0.00105948	0.000127876	1.33235e-15	0.00396805	0.00127518	0.00197713	-1.00191	0.435778	0.0219501	0.211054	0.026731
SL004153	M-CSF R	cg14855378	0.00315572	0.000731261	1.95386e-05	-0.000213871	4.34714e-05	1.21099e-06	0.00274051	0.000746179	0.000268443	-1.94142	0.782482	0.0134573	0.131575	0.0267372
SL003182	Integrin aVb5	cg26225893	0.00343001	0.000804446	2.44607e-05	-0.000275043	6.30647e-05	1.60145e-05	0.00300913	0.000816094	0.000254192	-1.53023	0.594996	0.0104342	0.122705	0.0267374
SL010470	Semaphorin 3E	cg21003581	0.0080889	0.00113961	4.87857e-12	0.000713107	9.54211e-05	4.0305e-13	0.00716824	0.00120163	4.90665e-09	1.29104	0.556614	0.0208119	0.113817	0.0267449
SL001766	HCG	cg05904218	0.0280648	0.00244188	4.90565e-27	-0.000213583	5.89487e-05	0.000323558	0.0269169	0.00245838	6.1942e-25	-5.37485	1.92135	0.00536846	0.0409043	0.0268115
SL004915	NCC27	cg05331060	-0.0071386	0.00266416	0.0076389	-0.000640326	6.02219e-05	9.50652e-24	-0.0101216	0.00296156	0.000688108	-4.65859	2.05791	0.0240576	0.417871	0.0268202
SL004139	Ephrin-A3	cg21596858	-0.00165059	0.000598347	0.00603867	-0.000332449	6.52851e-05	5.18675e-07	-0.00199943	0.000611751	0.0011636	-1.04932	0.426843	0.0143304	0.211345	0.0268393
SL002505	ANP	cg27432085	0.00396435	0.00131945	0.00280631	0.000701783	0.000169314	4.05435e-05	0.00329803	0.00133553	0.013898	0.949472	0.362617	0.00912929	0.168079	0.0268508
SL002525	C2	cg23384708	0.00222251	0.000451497	1.19681e-06	-0.000642057	6.93523e-05	8.24436e-19	0.00266721	0.000489933	8.54352e-08	0.692618	0.303805	0.0230819	0.200089	0.0268509
SL007674	LY9	cg04244970	0.00223361	0.000754654	0.00323832	-0.00104602	0.0001265	1.47871e-15	0.00156682	0.000805275	0.0523044	-0.637451	0.277463	0.0220453	1	0.0268576
SL004733	sLRP1	cg06899799	0.00327076	0.000845016	0.000124461	-0.000671729	6.0049e-05	8.00403e-26	0.00227351	0.000950113	0.0171228	-1.48461	0.657475	0.0244182	0.304899	0.0268702
SL002505	ANP	cg25467652	0.00396435	0.00131945	0.00280631	-0.00148538	0.000127519	1.24863e-27	0.00557965	0.00149631	0.000216545	1.08746	0.482394	0.0246519	0.407456	0.0268812
SL005200	MICB	cg06928741	0.00502956	0.00119425	3.05953e-05	-0.000465877	0.000107814	1.90797e-05	0.00564906	0.00121103	4.07225e-06	1.32976	0.516108	0.0102953	0.123172	0.0268991
SL013754	RASA1	cg08217409	-0.00300617	0.00119982	0.0125756	-0.000244962	6.82716e-05	0.0003693	-0.00244313	0.00120755	0.0436372	2.29847	0.817715	0.005155	0.187294	0.0269175
SL004153	M-CSF R	cg03405473	0.00315572	0.000731261	1.95386e-05	-0.000418275	5.54624e-05	2.52483e-13	0.00256152	0.000771762	0.000975621	-1.42059	0.613841	0.0210966	0.188292	0.0269363
SL003182	Integrin aVb5	cg07802917	0.00343001	0.000804446	2.44607e-05	0.00016986	6.61602e-05	0.0105652	0.00301549	0.000794653	0.000167884	2.44036	0.559658	1.60808e-05	0.120851	0.0269391
SL000408	Epo	cg01288993	0.00454535	0.00115058	9.03419e-05	0.000278564	7.01605e-05	8.33551e-05	0.00397927	0.00116255	0.000675634	2.03214	0.762882	0.00800144	0.12454	0.0269636
SL000441	HGF	cg16033274	0.00364184	0.00104014	0.000508881	-0.000260188	6.4231e-05	6.00453e-05	0.00416114	0.0010519	8.85271e-05	1.99586	0.755881	0.00856635	0.142593	0.0269659
SL004645	HAI-1	cg17082634	-0.00517781	0.000784259	1.13881e-10	0.00025534	7.44078e-05	0.000655103	-0.00554107	0.000788012	7.60076e-12	1.42264	0.491768	0.00400168	0.0701565	0.0269784
SL008591	TFF1	cg01879556	0.013346	0.00177516	2.951e-13	-0.00020559	6.20262e-05	0.000990738	0.0141555	0.00178119	1.50252e-14	3.93758	1.32603	0.0031403	0.0606569	0.0269874
SL014292	SIG14	cg22472290	0.0048865	0.0012065	6.03601e-05	0.000850798	0.000178463	2.53099e-06	0.00421049	0.00122966	0.000673968	0.794565	0.318256	0.0128988	0.138343	0.0269877
SL010617	TPSB2	cg03594246	0.00540033	0.00163415	0.00102565	0.000385289	7.28099e-05	1.88433e-07	0.0044209	0.00167447	0.00857035	2.54207	1.04427	0.0153035	0.181366	0.0269999
SL002706	CD23	cg20797216	0.00419297	0.00104102	6.59734e-05	-0.000893786	8.98209e-05	3.07837e-21	0.00528936	0.00114352	4.88095e-06	1.22668	0.540886	0.0238042	0.261482	0.0270219
SL005200	MICB	cg22616343	0.00502956	0.00119425	3.05953e-05	-0.000186074	5.89568e-05	0.00170506	0.00557202	0.001196	4.18326e-06	2.91529	0.940783	0.00206377	0.107854	0.0270247
SL012783	WFKN1	cg02855309	-0.00230958	0.000844852	0.00650562	0.000406787	0.000133809	0.00250107	-0.00269266	0.000844731	0.00153324	0.941731	0.292367	0.00136856	0.165867	0.0270451
SL016969	CSRP3	cg20129082	0.00668653	0.00135806	1.1882e-06	0.000372854	9.07378e-05	4.70572e-05	0.00600695	0.00137408	1.5283e-05	1.82265	0.69491	0.00901108	0.101634	0.0270456
SL001947	MIA	cg25509871	0.00234237	0.000730485	0.00143741	0.000913478	0.000130625	9.59288e-12	0.00178833	0.00076488	0.0198161	0.606516	0.260336	0.0202553	0.236529	0.0270834
SL007674	LY9	cg07813643	0.00223361	0.000754654	0.00323832	-0.000183465	5.34208e-05	0.000648036	0.0018867	0.00075826	0.0131946	-1.89086	0.654868	0.00406864	0.155313	0.0270993
SL000283	b2-Microglobulin	cg18088242	0.0108023	0.000662523	1.93329e-47	0.000448686	0.000102137	1.39115e-05	0.0111482	0.00067231	1.14607e-48	-0.770901	0.30161	0.0109129	0.0320203	0.027159
SL012517	RSPO4	cg12807794	0.0117264	0.00104032	3.59227e-26	0.000681197	7.72277e-05	2.41764e-17	0.0107514	0.00112025	5.46131e-20	1.43134	0.627255	0.0229545	0.0831477	0.027162
SL003327	Factor D	cg17377066	0.00826188	0.00065121	8.62886e-32	-0.000381267	5.59988e-05	3.12808e-11	0.00874494	0.000680256	1.79432e-32	1.26699	0.542527	0.01996	0.0584686	0.0271738
SL004143	GFRa-2	cg25764534	0.00453072	0.000615568	8.65596e-13	-0.000956408	0.000135216	5.74769e-12	0.00405837	0.00064541	7.56124e-10	-0.493883	0.212397	0.0204964	0.104256	0.0271759
SL003177	sICAM-2	cg20998539	0.0018218	0.000677025	0.00738736	-0.000861269	6.58637e-05	2.03949e-33	0.000897855	0.000790174	0.256439	-1.07277	0.478738	0.0255172	1	0.0271995
SL014008	FUT5	cg24122124	0.00729715	0.00101363	2.50156e-12	0.000286435	4.7041e-05	2.40601e-09	0.00797719	0.00104859	1.60738e-13	-2.37415	1.00182	0.0182107	0.0931926	0.0272119
SL009045	ENPP7	cg07661106	0.00535713	0.00178297	0.00280503	-0.000273935	4.24241e-05	2.72778e-10	0.00409904	0.00185323	0.0274719	-4.59267	1.95418	0.0191887	0.234844	0.0272132
SL003183	IP-10	cg02413100	0.00943465	0.00113979	1.40882e-15	-0.000241289	4.54707e-05	1.74941e-07	0.0101195	0.00116826	8.18787e-17	2.83833	1.16886	0.0155578	0.0725897	0.0272389
SL000316	C4	cg20532376	0.00345375	0.000902977	0.000149105	8.95205e-05	2.97421e-05	0.00275868	0.0038633	0.000902501	2.27475e-05	-4.5749	1.4086	0.0012491	0.11858	0.0272692
SL000316	C4	cg20532376	0.00345375	0.000902977	0.000149105	8.95205e-05	2.97421e-05	0.00275868	0.0038633	0.000902501	2.27475e-05	-4.5749	1.4086	0.0012491	0.11858	0.0272692
SL009045	ENPP7	cg14134128	0.00535713	0.00178297	0.00280503	-0.000741883	0.000103634	3.26137e-12	0.00397968	0.00187114	0.0339657	-1.8567	0.800093	0.0207474	0.257126	0.027278
SL001943	IL-6 sRa	cg12078486	0.00278235	0.000803878	0.000588258	-0.000190541	3.64141e-05	2.54911e-07	0.00325835	0.000823142	8.74609e-05	2.49815	1.02604	0.0152839	0.171078	0.0272805
SL000678	Granulysin	cg10963245	0.00543645	0.00107012	5.49814e-07	-0.000229861	4.36841e-05	2.19444e-07	0.00480004	0.00109612	1.47881e-05	-2.76868	1.13857	0.0154104	0.117064	0.0272859
SL007674	LY9	cg01550473	0.00223361	0.000754654	0.00323832	-0.000431101	9.1078e-05	2.94849e-06	0.00181947	0.000768519	0.0183241	-0.960643	0.38498	0.0129366	0.185411	0.0272892
SL016928	SLAF7	cg07369190	0.00621455	0.00127983	1.6553e-06	0.000915972	0.000118334	6.53603e-14	0.00514651	0.00135558	0.000166798	1.16602	0.506311	0.021735	0.171861	0.0272901
SL002684	CSF-1	cg02361903	0.00316027	0.000726803	1.69535e-05	-0.0010873	8.76741e-05	1.25423e-30	0.00221665	0.000837015	0.00837197	-0.86786	0.386923	0.0253799	0.298589	0.0273023
SL008644	BST1	cg22867816	-0.00305777	0.00098802	0.00209254	-0.000548643	0.000106624	3.99716e-07	-0.00247413	0.0010112	0.0148008	1.06379	0.435389	0.0149391	0.190872	0.0273051
SL000497	Laminin	cg09173681	0.00574291	0.00106975	1.26467e-07	0.000464708	0.00010575	1.3817e-05	0.00630003	0.00108556	1.21557e-08	-1.19886	0.469864	0.0110506	0.09701	0.027347
SL005207	NKp46	cg02683307	0.00249152	0.000718363	0.000573988	-0.000761498	8.01692e-05	1.25667e-19	0.00321702	0.000783353	4.76722e-05	0.952729	0.420012	0.0237816	0.291189	0.027363
SL010391	WFKN2	cg01156108	0.001754	0.000714473	0.014461	-0.000198373	7.0348e-05	0.00501265	0.00208333	0.000711734	0.00359191	1.66013	0.4687	0.000437918	0.187756	0.0273761
SL003764	NCAM-120	cg19537591	0.00239941	0.00056787	2.881e-05	-0.000357884	0.000126732	0.00495066	0.00266085	0.000565747	3.39663e-06	0.73052	0.206802	0.000453545	0.108961	0.0274019
SL000319	C5a	cg14254686	0.00348162	0.000473058	8.70783e-13	-0.000214975	5.23213e-05	4.72033e-05	0.00371858	0.000478707	5.38105e-14	1.10229	0.421633	0.00923834	0.0680613	0.0274062
SL005764	sCD163	cg17537007	0.00783328	0.000903022	7.28559e-17	-0.000137845	4.36756e-05	0.00170439	0.00742647	0.00090443	2.26132e-15	-2.95119	0.957262	0.0021736	0.051933	0.0274273
SL000316	C4	cg21342636	0.00345375	0.000902977	0.000149105	0.000703877	0.000166217	2.77075e-05	0.00299361	0.000914915	0.00114928	0.653724	0.253108	0.0101124	0.133229	0.0274525
SL000316	C4	cg21342636	0.00345375	0.000902977	0.000149105	0.000703877	0.000166217	2.77075e-05	0.00299361	0.000914915	0.00114928	0.653724	0.253108	0.0101124	0.133229	0.0274525
SL005200	MICB	cg27258561	0.00502956	0.00119425	3.05953e-05	0.000903401	0.000293168	0.00218444	0.00449026	0.00119494	0.00019381	0.59697	0.18912	0.00170269	0.107227	0.0274531
SL000414	Factor B	cg00686477	0.00161112	0.000502062	0.00142606	-0.000806505	0.000133154	2.90924e-09	0.00194686	0.00051929	0.000200407	0.416292	0.175878	0.0183543	0.20839	0.027483
SL008591	TFF1	cg05046272	0.013346	0.00177516	2.951e-13	-0.000646601	0.00012571	4.00374e-07	0.0143811	0.00181592	1.82952e-14	1.60082	0.656295	0.0151002	0.0775584	0.0275298
SL000616	Vitronectin	cg21872009	-0.00219761	0.000789008	0.00557036	-0.000771225	7.59687e-05	5.67982e-22	-0.00303975	0.000869567	0.000519068	-1.09195	0.483672	0.0244416	0.383206	0.0275396
SL003770	SARP-2	cg04472726	0.00545376	0.000824221	1.02695e-10	-0.000462824	0.000106018	1.56904e-05	0.00502714	0.000836174	3.75061e-09	-0.921774	0.361104	0.0110146	0.0782248	0.0275532
SL000017	vWF	cg04479580	0.00683016	0.00172313	8.55537e-05	-0.00020234	6.07313e-05	0.000932993	0.00761159	0.00172955	1.34316e-05	3.86201	1.31488	0.00347978	0.11441	0.0275778
SL000414	Factor B	cg18511546	0.00161112	0.000502062	0.00142606	-0.000613992	0.000141351	1.72864e-05	0.00187086	0.000509279	0.000267729	0.423031	0.165511	0.0109158	0.161216	0.0276051
SL008631	DSC2	cg13870990	0.00699782	0.000584003	5.94826e-29	0.000832627	9.55545e-05	5.48348e-17	0.00645784	0.00062788	1.89423e-22	0.648528	0.284905	0.023292	0.0771643	0.0276379
SL004260	resistin	cg24479032	0.00373419	0.000905999	4.46791e-05	7.34137e-05	2.36559e-05	0.00203177	0.00332702	0.000906839	0.000272459	5.54625	1.77461	0.00188945	0.109039	0.0276549
SL002525	C2	cg09715059	0.00222251	0.000451497	1.19681e-06	-0.0014558	0.000148993	1.34688e-20	0.00175715	0.000494384	0.000418822	-0.319659	0.141427	0.0242789	0.209384	0.0276585
SL001990	IL-1Ra	cg01507173	0.00383632	0.000893455	2.1472e-05	-0.000242342	5.42263e-05	9.92213e-06	0.00430667	0.000907452	2.78435e-06	1.94085	0.767049	0.0117333	0.122604	0.0276747
SL003326	I-TAC	cg08073591	0.00802603	0.00176915	7.31024e-06	0.00014898	2.86205e-05	2.92903e-07	0.00698598	0.00181106	0.000131066	6.98116	2.87305	0.0154879	0.129585	0.0276793
SL000316	C4	cg24055029	0.00345375	0.000902977	0.000149105	0.00146302	0.000244847	4.64085e-09	0.00285769	0.000933022	0.00232283	0.407419	0.172023	0.0182835	0.172584	0.0276834
SL000316	C4	cg24055029	0.00345375	0.000902977	0.000149105	0.00146302	0.000244847	4.64085e-09	0.00285769	0.000933022	0.00232283	0.407419	0.172023	0.0182835	0.172584	0.0276834
SL000064	Kallikrein 7	cg04297995	-0.0039735	0.000825654	2.02678e-06	-0.000479649	6.24151e-05	9.40491e-14	-0.00329532	0.0008732	0.000181918	1.4139	0.615255	0.0220085	0.170675	0.0276841
SL009045	ENPP7	cg24392889	0.00535713	0.00178297	0.00280503	0.000574946	9.13439e-05	7.23438e-10	0.00413087	0.00184938	0.025989	2.13283	0.907607	0.0192006	0.228903	0.0276993
SL000507	Lymphotoxin a1/b2	cg22261911	-0.00313023	0.000605886	3.57809e-07	-0.000144197	3.23891e-05	1.07145e-05	-0.00281184	0.000615291	6.29676e-06	2.20801	0.871801	0.0116544	0.101714	0.0277072
SL000507	Lymphotoxin a1/b2	cg22261911	-0.00313023	0.000605886	3.57809e-07	-0.000144197	3.23891e-05	1.07145e-05	-0.00281184	0.000615291	6.29676e-06	2.20801	0.871801	0.0116544	0.101714	0.0277072
SL004625	ADAMTS-4	cg18198545	0.00257071	0.000794847	0.00130879	-0.000527461	9.15932e-05	1.56354e-08	0.00307975	0.000819161	0.00019244	0.965082	0.4052	0.0176429	0.198017	0.027741
SL000316	C4	cg04637007	0.00345375	0.000902977	0.000149105	0.000121148	3.63326e-05	0.000924649	0.00386377	0.000906425	2.45841e-05	-3.38445	1.15555	0.0035732	0.118717	0.0277703
SL000316	C4	cg04637007	0.00345375	0.000902977	0.000149105	0.000121148	3.63326e-05	0.000924649	0.00386377	0.000906425	2.45841e-05	-3.38445	1.15555	0.0035732	0.118717	0.0277703
SL000414	Factor B	cg04021562	0.00161112	0.000502062	0.00142606	-0.000753985	5.93248e-05	6.98032e-32	0.00227639	0.00058188	0.000105481	0.88234	0.395021	0.0259923	0.412924	0.0278114
SL000250	a2-Antiplasmin	cg01912040	-0.00316463	0.000449491	7.08532e-12	0.000445711	0.000113257	9.60188e-05	-0.00338294	0.000454065	4.72207e-13	0.489793	0.184636	0.00826307	0.0689831	0.0278304
SL003994	BMP-1	cg23965061	-0.00297053	0.000897161	0.001003	0.000225918	4.66017e-05	1.71215e-06	-0.00247173	0.000914821	0.00715158	-2.20791	0.894613	0.013952	0.167918	0.0278499
SL001766	HCG	cg20114023	0.0280648	0.00244188	4.90565e-27	-0.00012653	3.07762e-05	4.66318e-05	0.0292783	0.002471	1.98883e-28	9.59022	3.68431	0.00954182	0.0432376	0.0278594
SL010450	CD48	cg14448116	0.00545014	0.000606665	6.90733e-18	-0.000204538	6.1317e-05	0.000920069	0.00517553	0.000608993	2.75335e-16	-1.34259	0.459039	0.00361874	0.050386	0.0278664
SL005221	SREC-I	cg11398400	0.00427715	0.000998574	2.2455e-05	0.000256388	3.63859e-05	6.78397e-12	0.00503457	0.00104634	2.03745e-06	-2.95416	1.27632	0.0210774	0.177083	0.0278779
SL002602	Trefoil factor 2	cg05046272	0.00958421	0.00102396	3.59784e-19	-0.000646601	0.00012571	4.00374e-07	0.0101796	0.00104751	2.03851e-20	0.920863	0.378583	0.0153822	0.0621262	0.0278839
SL005221	SREC-I	cg20664636	0.00427715	0.000998574	2.2455e-05	-0.000295746	7.82601e-05	0.000178244	0.00380367	0.00100711	0.000179826	-1.60098	0.592156	0.00711391	0.110701	0.0278882
SL002517	TNF-a	cg06540876	0.00209346	0.00076135	0.00620318	-0.00125626	0.000167399	3.26986e-13	0.00270658	0.000803317	0.00081798	0.488055	0.212221	0.0219151	0.292877	0.0278904
SL000678	Granulysin	cg20839205	0.00543645	0.00107012	5.49814e-07	-0.000620454	0.000121479	4.79876e-07	0.00481767	0.00109429	1.33351e-05	-0.997312	0.409421	0.0152355	0.113822	0.0279024
SL004298	granzyme A	cg02707114	0.00349307	0.00064455	9.69641e-08	-0.000353453	6.62328e-05	1.49463e-07	0.00310686	0.000660852	3.42999e-06	-1.09269	0.452841	0.0162171	0.110566	0.0279029
SL006830	complement factor H-related 5	cg13441112	0.00294053	0.000809926	0.000314792	-0.000578362	8.58009e-05	4.77653e-11	0.0035323	0.000845243	3.51136e-05	1.02319	0.439928	0.0204675	0.201247	0.0279055
SL004845	EphB4	cg12019109	-0.00326883	0.000801903	5.39764e-05	-0.000339575	5.94605e-05	2.02865e-08	-0.00377705	0.000825865	6.19329e-06	-1.49664	0.628344	0.0176346	0.155475	0.0279248
SL009207	Dynactin subunit 2	cg11851129	0.0049212	0.000522017	2.12069e-19	-0.00032032	7.19581e-05	1.07296e-05	0.00464804	0.000530098	3.62374e-17	-0.852767	0.337366	0.0118173	0.0555064	0.0279443
SL000522	MMP-12	cg25478299	0.0200129	0.00128758	4.6758e-44	0.000705372	0.000172252	4.99108e-05	0.0193751	0.00130274	4.35912e-41	0.904244	0.347098	0.00948271	0.0318708	0.0279452
SL002525	C2	cg05227616	0.00222251	0.000451497	1.19681e-06	-0.000327041	6.32347e-05	3.48022e-07	0.00248689	0.0004621	1.18478e-07	0.808397	0.332943	0.0155686	0.118955	0.027958
SL006924	ART	cg00707134	-0.00377746	0.000646691	9.85121e-09	-0.000860267	0.000103192	9.05734e-16	-0.00434939	0.000690964	7.24443e-10	-0.664824	0.291818	0.0231755	0.151405	0.0279753
SL008591	TFF1	cg01256260	0.013346	0.00177516	2.951e-13	-0.000553806	9.94408e-05	4.36895e-08	0.0144448	0.00182491	1.88309e-14	1.9841	0.82988	0.0172142	0.0823324	0.0280245
SL000089	TGF-b3	cg10307145	0.0021896	0.000782384	0.00535016	0.0003613	7.86366e-05	5.62327e-06	0.00260871	0.000795745	0.00112445	-1.16002	0.463763	0.0127239	0.191413	0.0280298
SL018971	ZNRF3	cg25916307	0.0037032	0.00114382	0.00129403	-0.000292082	5.1528e-05	2.56894e-08	0.00442544	0.00117763	0.000193768	2.4727	1.03761	0.0175813	0.195029	0.0280331
SL003685	PBEF	cg25845688	0.00529296	0.00107619	1.22023e-06	-0.000353661	0.000101263	0.000525062	0.00480001	0.00108222	1.15355e-05	-1.39384	0.493387	0.00493472	0.0931327	0.0280608
SL004143	GFRa-2	cg04662594	0.00453072	0.000615568	8.65596e-13	-0.00110572	0.00013275	9.64942e-16	0.00507552	0.000657816	7.70714e-14	0.492712	0.216395	0.023256	0.120246	0.0280685
SL002823	sL-Selectin	cg25256723	-0.00381713	0.00057374	8.20979e-11	-0.00165495	8.91607e-05	9.34256e-58	-0.00272129	0.000756268	0.000355262	0.662157	0.299414	0.0274945	0.287085	0.0280934
SL008623	CNTN2	cg03220945	0.00612979	0.000933543	1.403e-10	-0.000310448	5.40894e-05	1.72945e-08	0.00672178	0.000961667	9.80641e-12	1.90689	0.802411	0.0178909	0.0965759	0.0281145
SL010369	Carbonic Anhydrase IV	cg19273756	0.00452943	0.000664834	3.04249e-11	-0.000223546	5.91935e-05	0.000180125	0.00484491	0.000670559	2.13054e-12	1.41124	0.522944	0.00722172	0.0696506	0.0281155
SL000414	Factor B	cg20392842	0.00161112	0.000502062	0.00142606	-0.000317957	5.64315e-05	3.08333e-08	0.00192568	0.000516629	0.000217891	0.989321	0.41496	0.0175292	0.195244	0.0281162
SL000406	Eotaxin	cg16629942	0.00870184	0.000939517	7.81041e-19	0.00016784	5.12961e-05	0.00114869	0.00912358	0.000942477	2.76468e-20	-2.51275	0.848666	0.00322789	0.0484654	0.0281348
SL005764	sCD163	cg02133936	0.00783328	0.000903022	7.28559e-17	0.00011453	3.65438e-05	0.00183489	0.00823634	0.000904338	2.64165e-18	-3.51925	1.14414	0.00222456	0.0514546	0.0281451
SL010464	LRIG3	cg12949547	-0.00112019	0.000385171	0.00381116	-0.000615227	8.40838e-05	1.14953e-12	-0.000818236	0.000405207	0.0440402	0.490797	0.213281	0.0218318	0.269554	0.0281513
SL010470	Semaphorin 3E	cg14411518	0.0080889	0.00113961	4.87857e-12	-0.000318662	8.39801e-05	0.000167897	0.00754763	0.00114962	1.419e-10	-1.69856	0.631169	0.00738309	0.0669149	0.0281553
SL010449	Carbonic Anhydrase X	cg20004659	0.00151553	0.000638925	0.0181072	-0.00035179	0.000102483	0.000652279	0.00122425	0.000642118	0.0572058	-0.82799	0.290006	0.00449963	1	0.0281594
SL008835	ASGR1	cg14421980	0.00378884	0.000825355	5.72401e-06	-0.000668824	7.50357e-05	1.19551e-17	0.00301218	0.000890348	0.000778556	-1.16124	0.512782	0.0240075	0.204988	0.0281736
SL004145	HVEM	cg26846424	0.00272435	0.00071403	0.00015476	0.000325536	7.34398e-05	1.16832e-05	0.00309732	0.000725035	2.36274e-05	-1.14574	0.453628	0.0118859	0.136906	0.0282005
SL004362	SCGF-alpha	cg19564512	0.00342982	0.00091736	0.00020837	-0.000380504	9.50973e-05	7.35037e-05	0.00387753	0.000927337	3.47563e-05	1.17662	0.448367	0.00897597	0.130534	0.0282086
SL000428	FSH	cg12911847	0.0363179	0.00193302	8.39055e-59	-0.000165449	2.86132e-05	1.36584e-08	0.0375504	0.0019923	4.76761e-59	7.44956	3.14091	0.018116	0.033937	0.0282099
SL010514	PTK6	cg24368588	0.00667897	0.00115642	1.42119e-08	-0.00032297	6.76055e-05	2.39945e-06	0.00731452	0.00117843	1.21709e-09	1.96784	0.796592	0.013865	0.0951572	0.0282133
SL005200	MICB	cg10995925	0.00502956	0.00119425	3.05953e-05	-0.000433156	7.76491e-05	4.17263e-08	0.00428805	0.0012281	0.000527059	-1.71188	0.71734	0.0174218	0.14743	0.0282294
SL005173	IL-10 Ra	cg26103805	0.00233681	0.000465393	7.37574e-07	-0.000273984	4.31149e-05	5.05691e-10	0.00201497	0.000483165	3.64126e-05	-1.17465	0.502485	0.0198353	0.137725	0.0282393
SL005184	IL-23	cg03599547	0.00631786	0.0010959	1.50269e-08	-0.000441578	7.41198e-05	5.10738e-09	0.00560173	0.00113195	1.05196e-06	-1.62176	0.687465	0.0187419	0.113351	0.028282
SL010371	CD39	cg03610280	0.00166161	0.000669348	0.0134077	-0.00114924	0.000191615	4.07845e-09	0.00122079	0.000691803	0.0782934	-0.383574	0.162773	0.0188711	1	0.0282871
SL000467	IgG	cg01749142	0.00158342	0.000605552	0.00922611	-0.00029658	5.46923e-05	9.58805e-08	0.00121462	0.000621717	0.0513603	-1.24348	0.518636	0.0169099	1	0.0283205
SL012783	WFKN1	cg10071493	-0.00230958	0.000844852	0.00650562	0.000453274	0.000141497	0.00145303	-0.00193212	0.000846862	0.022979	-0.832748	0.276875	0.00277821	0.163434	0.0283307
SL009045	ENPP7	cg18947175	0.00535713	0.00178297	0.00280503	0.00100915	0.000164304	1.77052e-09	0.00416199	0.00184588	0.0246219	1.18431	0.504586	0.019347	0.223093	0.0283469
SL007674	LY9	cg17972058	0.00223361	0.000754654	0.00323832	-0.000517627	9.30857e-05	4.57178e-08	0.00176821	0.000775751	0.023106	-0.899087	0.376894	0.0174617	0.208359	0.0283578
SL002722	CD38	cg09024126	0.00244657	0.000748602	0.00116458	0.000621128	8.30636e-05	3.93638e-13	0.00304618	0.000789669	0.00013114	-0.965367	0.421003	0.0223043	0.245085	0.0283605
SL001797	Kallikrein 6	cg14324694	0.003778	0.000568646	8.8062e-11	-0.000512003	0.000113642	8.44536e-06	0.00407853	0.000577901	6.43299e-12	0.586971	0.233995	0.0124753	0.0795477	0.0284032
SL007310	RAC3	cg11873161	-0.00562849	0.00230917	0.0151709	-0.000110135	4.02036e-05	0.00639458	-0.00669401	0.00229726	0.00374445	-9.67464	2.6484	0.000289204	0.189309	0.0284051
SL004010	SCF sR	cg01411892	-0.00451181	0.00083709	1.13423e-07	0.000399988	0.000132844	0.00274905	-0.00413794	0.000836957	1.07884e-06	-0.934694	0.292464	0.00149106	0.082864	0.0284122
SL012168	LIN7B	cg07134608	0.00260066	0.000942678	0.00603468	-0.000661887	0.000121094	7.59569e-08	0.00317474	0.000968073	0.00111995	0.86733	0.362679	0.0171871	0.220742	0.028457
SL000316	C4	cg06539391	0.00345375	0.000902977	0.000149105	-0.000338579	8.01831e-05	2.91809e-05	0.0039091	0.000914918	2.35506e-05	1.34486	0.524743	0.0107017	0.131839	0.0284579
SL000316	C4	cg06539391	0.00345375	0.000902977	0.000149105	-0.000338579	8.01831e-05	2.91809e-05	0.0039091	0.000914918	2.35506e-05	1.34486	0.524743	0.0107017	0.131839	0.0284579
SL000507	Lymphotoxin a1/b2	cg12493058	-0.00313023	0.000605886	3.57809e-07	-0.000435202	7.68147e-05	2.60222e-08	-0.00274988	0.000623719	1.29872e-05	0.873967	0.367905	0.0179384	0.121509	0.0284702
SL000507	Lymphotoxin a1/b2	cg12493058	-0.00313023	0.000605886	3.57809e-07	-0.000435202	7.68147e-05	2.60222e-08	-0.00274988	0.000623719	1.29872e-05	0.873967	0.367905	0.0179384	0.121509	0.0284702
SL000344	Cathepsin D	cg00982805	0.00726572	0.00112617	2.85095e-10	-0.000187853	6.74285e-05	0.00556142	0.00778227	0.00112154	1.38007e-11	2.74978	0.775722	0.000433941	0.0710948	0.0284935
SL008822	EMR2	cg17738169	0.00443812	0.000772457	1.67797e-08	0.00065496	9.23344e-05	5.02687e-12	0.00384999	0.000810145	2.70263e-06	0.897975	0.389932	0.0217347	0.132519	0.0284982
SL005184	IL-23	cg10516204	0.00631786	0.0010959	1.50269e-08	-0.000195414	7.06853e-05	0.00592985	0.00581623	0.00109095	1.53521e-07	-2.56702	0.715234	0.00036775	0.079399	0.028513
SL018256	CHKB	cg03422583	-0.0118553	0.00115612	2.43005e-22	0.000488973	0.000168567	0.00390252	-0.0113366	0.00115397	8.72653e-21	-1.06073	0.317665	0.00090939	0.0437503	0.0285343
SL001947	MIA	cg22525743	0.00234237	0.000730485	0.00143741	-0.000484683	9.66792e-05	7.66676e-07	0.00192757	0.000746291	0.0101087	-0.855804	0.351554	0.0153014	0.177083	0.0285363
SL005488	SPARCL1	cg26678245	0.00444605	0.00075232	6.71377e-09	-0.00070668	9.22984e-05	1.15229e-13	0.00505964	0.000795541	4.91856e-10	0.868279	0.379948	0.0227571	0.138009	0.0285391
SL000420	Ferritin	cg07800524	0.00836845	0.00229777	0.00030145	-0.000471941	6.29488e-05	3.40323e-13	0.00653397	0.0024235	0.00727476	-3.88709	1.6978	0.0225057	0.219214	0.0285482
SL004298	granzyme A	cg09165004	0.00349307	0.00064455	9.69641e-08	0.00132556	0.000151005	3.33937e-17	0.00289729	0.000693661	3.5433e-05	0.449456	0.198775	0.0242214	0.170561	0.028549
SL000024	TF	cg25196715	0.00604793	0.000732148	1.59486e-15	-0.000614295	6.17558e-05	3.17123e-21	0.00528501	0.000804282	1.37256e-10	-1.24195	0.553346	0.0252857	0.126146	0.0285686
SL001766	HCG	cg12986110	0.0280648	0.00244188	4.90565e-27	-0.000433023	9.85811e-05	1.39303e-05	0.0293231	0.00247828	2.31633e-28	2.90586	1.1507	0.0118976	0.0448356	0.0285766
SL014983	H2B2E	cg00324257	0.00458629	0.00119316	0.000138323	0.00078659	0.000125758	9.17092e-10	0.00377353	0.00123725	0.00242254	1.03328	0.442147	0.0198742	0.177216	0.0285859
SL004859	GITR	cg08844387	0.00272492	0.00112582	0.015897	-0.00015652	4.39828e-05	0.000412198	0.00220565	0.00113311	0.0522089	-3.3176	1.19514	0.0057336	1	0.0286138
SL007310	RAC3	cg25184717	-0.00562849	0.00230917	0.0151709	-0.000178458	3.85821e-05	4.87194e-06	-0.00686129	0.00234927	0.00366638	-6.90805	2.781	0.0133482	0.219028	0.0286401
SL008591	TFF1	cg07374224	0.013346	0.00177516	2.951e-13	0.000889038	0.000106793	9.82022e-16	0.0117868	0.00189618	1.1498e-09	1.75376	0.773226	0.0237883	0.116826	0.0286444
SL004724	MOZ	cg01544807	0.002224	0.000831382	0.0077395	-0.000101626	2.54574e-05	7.63101e-05	0.00262764	0.000840396	0.00188104	3.97174	1.51799	0.00917993	0.18149	0.0286471
SL014009	HDGR2	cg21927946	0.00433966	0.000955934	7.21352e-06	0.000459926	4.72724e-05	1.85842e-20	0.00336721	0.00104567	0.00137278	2.11436	0.941783	0.025243	0.224084	0.0287008
SL002525	C2	cg01064373	0.00222251	0.000451497	1.19681e-06	-0.000524283	0.000119065	1.33007e-05	0.00245607	0.000458329	1.33548e-07	0.445481	0.176737	0.0120574	0.105087	0.0287027
SL010391	WFKN2	cg22809726	0.001754	0.000714473	0.014461	-0.000185121	5.60615e-05	0.0010347	0.00207323	0.000717063	0.00401957	1.72445	0.590677	0.00367974	0.182003	0.028728
SL000428	FSH	cg21758962	0.0363179	0.00193302	8.39055e-59	-0.000425092	7.1497e-05	5.46783e-09	0.0375749	0.00199638	6.30456e-59	2.9569	1.25713	0.0190904	0.0346098	0.0287292
SL000308	C1-Esterase Inhibitor	cg19752551	0.00324786	0.000727719	1.01881e-05	-0.000322043	0.000110061	0.00360409	0.00357228	0.000726724	1.23696e-06	1.00738	0.306019	0.00107249	0.0998871	0.0287442
SL000247	6-Phosphogluconate dehydrogenase	cg18163627	-0.0351254	0.00272073	9.74761e-33	-0.000240637	6.75606e-05	0.000406897	-0.0338798	0.00273826	1.57916e-30	5.17615	1.86817	0.00582149	0.0354608	0.028747
SL005207	NKp46	cg09521703	0.00249152	0.000718363	0.000573988	0.0011443	0.000164283	1.1643e-11	0.00303165	0.000752434	6.57207e-05	-0.47202	0.204928	0.0217144	0.216789	0.0287513
SL000316	C4	cg23649211	0.00345375	0.000902977	0.000149105	0.000105035	3.44637e-05	0.00244035	0.00385484	0.000903401	2.41246e-05	-3.8186	1.21654	0.00180627	0.11613	0.0287731
SL000316	C4	cg23649211	0.00345375	0.000902977	0.000149105	0.000105035	3.44637e-05	0.00244035	0.00385484	0.000903401	2.41246e-05	-3.8186	1.21654	0.00180627	0.11613	0.0287731
SL001766	HCG	cg00346180	0.0280648	0.00244188	4.90565e-27	0.000126562	4.62514e-05	0.00645298	0.0291847	0.0024296	4.45284e-29	-8.84812	2.43476	0.000310637	0.0399018	0.0288165
SL005172	IGFBP-6	cg19959477	0.00755524	0.000703482	3.82194e-24	-0.000271081	6.21591e-05	1.60076e-05	0.00719482	0.000713781	1.04585e-21	-1.32957	0.526317	0.0118685	0.0477048	0.0288207
SL005699	Apo L1	cg02066925	-0.00373264	0.000855238	1.57869e-05	0.000325632	8.9017e-05	0.00028383	-0.00333566	0.000861656	0.00012418	-1.2191	0.447261	0.00666446	0.106354	0.0288392
SL007250	PK3CG	cg10691109	0.00272355	0.00103571	0.00883599	-0.000934551	8.96189e-05	5.53468e-23	0.00384771	0.00114737	0.000864453	1.20289	0.538261	0.0259157	0.412757	0.028877
SL004260	resistin	cg08356214	0.00373419	0.000905999	4.46791e-05	-0.000669333	6.16654e-05	1.41556e-24	0.00475595	0.0010117	3.43564e-06	1.52653	0.684301	0.0261807	0.273622	0.0288802
SL019019	PIANP	cg01607849	0.00297895	0.000717388	3.92765e-05	-0.000997453	6.46408e-05	1.65388e-43	0.00411927	0.000881677	3.93451e-06	1.14323	0.518087	0.0278396	0.382791	0.0289321
SL014009	HDGR2	cg03016975	0.00433966	0.000955934	7.21352e-06	-0.000348884	4.91557e-05	4.87857e-12	0.00506489	0.00100257	6.33975e-07	2.07873	0.905474	0.0221438	0.167118	0.0289391
SL016928	SLAF7	cg00689010	0.00621455	0.00127983	1.6553e-06	-0.000138094	3.48122e-05	8.46713e-05	0.00559372	0.00129358	1.88578e-05	-4.49569	1.71815	0.00917964	0.0998994	0.0289467
SL000509	Lymphotoxin b R	cg20246277	0.00263633	0.000807293	0.00117448	-0.000313252	4.31429e-05	1.67353e-12	0.00326205	0.000848742	0.000138601	1.99752	0.872222	0.0224692	0.237348	0.028956
SL008835	ASGR1	cg03407747	0.00378884	0.000825355	5.72401e-06	0.000988369	0.000254365	0.000117191	0.00339484	0.000833466	5.47119e-05	0.398642	0.150965	0.00855966	0.103991	0.0289602
SL010517	STK16	cg16725050	0.00233295	0.000731003	0.00151345	-0.000285536	4.59037e-05	1.12345e-09	0.00282722	0.000757705	0.000214594	1.73103	0.742139	0.0201104	0.211865	0.028963
SL005200	MICB	cg03780997	0.00502956	0.00119425	3.05953e-05	-0.000283391	8.93785e-05	0.00162351	0.0055596	0.0011968	4.45313e-06	1.87033	0.620924	0.00273879	0.105384	0.028976
SL014983	H2B2E	cg18016565	0.00458629	0.00119316	0.000138323	-0.000866186	8.61166e-05	1.25143e-21	0.00583805	0.00131314	1.10115e-05	1.44513	0.645995	0.0257656	0.272934	0.0289837
SL000414	Factor B	cg03465464	0.00161112	0.000502062	0.00142606	-0.000286317	6.12017e-05	3.82115e-06	0.00188148	0.000511141	0.000260299	0.94426	0.382446	0.013916	0.167807	0.0289943
SL003785	GAPDH, liver	cg11751101	0.00744038	0.00266461	0.00545254	-0.00112934	8.41175e-05	6.89379e-35	0.00375708	0.00313226	0.230963	-3.26145	1.47392	0.0274071	1	0.0290127
SL014111	KIRR3	cg12731799	0.00229708	0.000749551	0.00230881	-0.000570429	9.58364e-05	5.28476e-09	0.00180925	0.000774308	0.0198928	-0.855198	0.364463	0.0193808	0.212369	0.0290391
SL004557	CD59	cg06224751	0.00651363	0.00049014	2.70656e-34	0.000356987	6.40864e-05	4.35042e-08	0.00621179	0.00050399	2.55412e-30	0.845512	0.356351	0.0180737	0.0463393	0.0290418
SL000558	Prothrombin	cg18568067	-0.00138569	0.000482555	0.0042741	-0.000773028	8.09185e-05	7.73314e-20	-0.000904328	0.000526233	0.0863852	0.622701	0.277738	0.0254384	1	0.029055
SL002525	C2	cg18340416	0.00222251	0.000451497	1.19681e-06	-0.00061949	8.86373e-05	9.90147e-12	0.00256082	0.000472896	9.94321e-08	0.546113	0.237684	0.0220361	0.15222	0.0290565
SL005172	IGFBP-6	cg07022048	0.00755524	0.000703482	3.82194e-24	-0.000497684	7.28355e-05	2.66682e-11	0.00807062	0.000735091	4.82414e-25	1.03555	0.449694	0.0217395	0.0682147	0.0290943
SL000460	IgD	cg26082174	-0.0135408	0.00430383	0.00176173	7.87961e-05	2.33757e-05	0.000812799	-0.0154665	0.00432306	0.000383695	24.4388	8.53635	0.00439069	0.142213	0.029102
SL004180	CD30	cg21194726	0.00299945	0.000702285	2.36963e-05	-0.000262557	5.34921e-05	1.2812e-06	0.00260838	0.000716731	0.000304766	-1.48949	0.611511	0.0152441	0.130382	0.0291197
SL004016	CXCL16, soluble	cg06844165	0.00374449	0.00051959	2.40083e-12	-0.000340565	5.87252e-05	1.24751e-08	0.00407545	0.000535782	1.63623e-13	0.971803	0.412736	0.0189707	0.0883864	0.0291401
SL000408	Epo	cg16581017	0.00454535	0.00115058	9.03419e-05	-0.000460084	6.1044e-05	2.61535e-13	0.00362406	0.00121457	0.00299982	-2.00244	0.878622	0.0231253	0.202689	0.0291454
SL012698	KI2L4	cg07280593	0.00385599	0.00150065	0.0104987	-0.000160031	4.69892e-05	0.000718052	0.0031828	0.00150794	0.0353418	-4.20663	1.48089	0.004704	0.174583	0.0291525
SL013548	IL-34	cg11706111	0.0029812	0.00065176	6.18214e-06	-0.000283316	6.89689e-05	4.73907e-05	0.00330304	0.000659703	7.94457e-07	1.13596	0.44127	0.0103614	0.107955	0.0291566
SL000695	Lipocalin 2	cg14644065	0.00454718	0.000559148	4.00076e-15	-0.000322951	6.74989e-05	2.31685e-06	0.00424217	0.000569869	4.90897e-13	-0.944465	0.385395	0.0146349	0.067078	0.0291708
SL002517	TNF-a	cg11396628	0.00209346	0.00076135	0.00620318	-0.00100655	0.000183167	6.50719e-08	0.00162976	0.000782225	0.0377653	-0.460681	0.193877	0.0179082	0.221499	0.0291839
SL000497	Laminin	cg11241436	0.00574291	0.00106975	1.26467e-07	0.000311907	5.85774e-05	1.58766e-07	0.0051099	0.00109673	4.16972e-06	2.02947	0.848977	0.0172296	0.110224	0.0291979
SL014270	CLM6	cg06995624	0.00642427	0.000666351	3.80702e-20	-0.000288415	5.06185e-05	2.1772e-08	0.00600713	0.00068619	4.029e-17	-1.44633	0.612737	0.0186736	0.0649323	0.0292045
SL000382	CK-MM	cg21629821	-0.00766185	0.00165003	4.4849e-06	-0.0010531	0.000128601	2.65897e-15	-0.00908518	0.00175904	3.60262e-07	-1.35157	0.597504	0.0241663	0.185769	0.0292307
SL001766	HCG	cg25937395	0.0280648	0.00244188	4.90565e-27	-0.00027664	9.21291e-05	0.00282195	0.0269892	0.00244179	2.48852e-25	-3.88817	1.22644	0.00162519	0.0383264	0.0292509
SL000316	C4	cg14756795	0.00345375	0.000902977	0.000149105	-0.000623867	0.00013072	2.45512e-06	0.00394615	0.000920255	2.20273e-05	0.78926	0.322073	0.0146397	0.142568	0.0292592
SL000316	C4	cg14756795	0.00345375	0.000902977	0.000149105	-0.000623867	0.00013072	2.45512e-06	0.00394615	0.000920255	2.20273e-05	0.78926	0.322073	0.0146397	0.142568	0.0292592
SL000506	FSH	cg12911847	0.0142845	0.00181761	2.79114e-14	-0.000165449	2.86132e-05	1.36584e-08	0.0154345	0.00187352	1.85809e-15	6.95097	2.95365	0.019028	0.0805089	0.0292775
SL005102	SHBG	cg02489908	0.00429326	0.00120378	0.000399889	0.000781545	7.84698e-05	2.77853e-21	0.0055393	0.00132201	3.34865e-05	-1.59433	0.713721	0.0259777	0.290231	0.0292816
SL000017	vWF	cg15837470	0.00683016	0.00172313	8.55537e-05	-0.000567623	0.000109371	3.16875e-07	0.00782858	0.00176392	1.1385e-05	1.75896	0.732374	0.0167164	0.146179	0.029284
SL005102	SHBG	cg10055235	0.00429326	0.00120378	0.000399889	-0.000237229	4.96689e-05	2.40843e-06	0.00494778	0.00122672	6.44357e-05	2.759	1.12635	0.0146796	0.152452	0.0292884
SL005102	SHBG	cg25827022	0.00429326	0.00120378	0.000399889	0.000235115	6.84459e-05	0.000646388	0.00483401	0.00121004	7.54155e-05	-2.29992	0.815636	0.00501445	0.125952	0.0292945
SL008865	PSA2	cg16848937	0.00275247	0.000734722	0.000202492	-0.000391099	7.33108e-05	1.50944e-07	0.00231659	0.000753432	0.0022338	-1.11449	0.466925	0.0173998	0.158358	0.0293506
SL000525	MMP-7	cg06936402	0.00991017	0.00112025	1.97363e-17	-0.000194464	4.48193e-05	1.76371e-05	0.00934127	0.00113642	2.12342e-15	-2.92545	1.16117	0.0120954	0.0574051	0.0293514
SL005191	ILT-4	cg09318158	0.00469515	0.000647034	1.72262e-12	-0.000572589	0.000105031	8.19085e-08	0.00430454	0.000664409	2.40585e-10	-0.682196	0.287028	0.0178783	0.0831961	0.0293537
SL008644	BST1	cg02183671	-0.00305777	0.00098802	0.00209254	-8.34493e-05	2.80752e-05	0.00311455	-0.00349762	0.000987563	0.000439372	-5.27093	1.64574	0.00145837	0.143849	0.0293557
SL011535	RBM39	cg06575425	0.00299077	0.00124005	0.0162687	-0.000236356	5.31417e-05	1.0925e-05	0.00234834	0.00125949	0.062893	-2.71805	1.0877	0.0128108	1	0.029363
SL008865	PSA2	cg22411165	0.00275247	0.000734722	0.000202492	-0.000246137	7.08919e-05	0.00056581	0.00308423	0.000738858	3.58221e-05	1.34787	0.481744	0.00536192	0.120532	0.0293639
SL002644	ERBB1	cg08337633	-0.00330091	0.000366261	5.60552e-18	-0.00065688	5.10034e-05	1.40059e-32	-0.00281421	0.00042603	1.10981e-10	0.74093	0.335228	0.0275875	0.147445	0.0293776
SL000316	C4	cg14308867	0.00345375	0.000902977	0.000149105	0.000105936	2.98282e-05	0.000422898	0.00386539	0.000908835	2.56117e-05	-3.88566	1.40901	0.00605531	0.119184	0.0293926
SL000316	C4	cg14308867	0.00345375	0.000902977	0.000149105	0.000105936	2.98282e-05	0.000422898	0.00386539	0.000908835	2.56117e-05	-3.88566	1.40901	0.00605531	0.119184	0.0293926
SL003332	MMP-17	cg02521854	0.00214594	0.000896659	0.0171028	-0.000354307	5.19882e-05	2.99242e-11	0.0014912	0.000936827	0.112134	-1.84795	0.803914	0.0219749	1	0.0293964
SL000017	vWF	cg00808053	0.00683016	0.00172313	8.55537e-05	0.000160168	4.72622e-05	0.000762304	0.0076	0.00173127	1.41043e-05	-4.80649	1.69059	0.0046682	0.112713	0.0293983
SL004145	HVEM	cg24937768	0.00272435	0.00071403	0.00015476	0.000111947	3.89758e-05	0.00426694	0.00304241	0.000712556	2.38583e-05	-2.84118	0.850326	0.000902968	0.116748	0.0293997
SL000414	Factor B	cg20724257	0.00161112	0.000502062	0.00142606	-0.00103914	8.62102e-05	3.15031e-29	0.00223664	0.000574219	0.000112919	0.601952	0.271856	0.0273087	0.388248	0.0294214
SL009089	PGCB	cg10981464	-0.00286269	0.000829285	0.000608306	0.000658098	0.000101559	2.38309e-10	-0.00344182	0.000862525	7.68658e-05	0.880005	0.380579	0.0212077	0.202303	0.0294221
SL008193	NID2	cg00879541	0.00256154	0.000999051	0.0106662	-0.000537164	0.000103675	3.31081e-07	0.00313889	0.00102262	0.00227204	1.07481	0.447956	0.016823	0.225392	0.0294627
SL018891	DSCAM	cg13489049	0.002315	0.00080732	0.00433062	-0.000662642	9.52155e-05	1.20729e-11	0.00291779	0.000845505	0.00061121	0.90969	0.39695	0.022383	0.260388	0.0295015
SL000414	Factor B	cg14075607	0.00161112	0.000502062	0.00142606	-0.000181896	3.50068e-05	3.07943e-07	0.00190272	0.00051407	0.000240852	1.6031	0.668878	0.0169468	0.18099	0.0295297
SL004724	MOZ	cg14537886	0.002224	0.000831382	0.0077395	0.000476454	0.00011382	3.40643e-05	0.00263621	0.00084213	0.00185773	-0.865159	0.339649	0.0111861	0.185345	0.0295546
SL006522	LG3BP	cg00739217	0.00311453	0.000973194	0.00146818	-0.00114786	0.000108346	1.32187e-23	0.0020482	0.00108127	0.0588227	-0.928965	0.417921	0.0267162	1	0.0295959
SL014091	SORC2	cg09477006	-0.0112039	0.00170032	1.23542e-10	-0.000203586	3.87311e-05	2.27174e-07	-0.0122042	0.00174256	9.13501e-12	-4.91349	2.05649	0.0172932	0.0892834	0.0296222
SL014292	SIG14	cg13393830	0.0048865	0.0012065	6.03601e-05	0.000916629	0.000125699	1.40106e-12	0.00394161	0.00127044	0.00204074	1.03084	0.45237	0.0231553	0.193368	0.0296285
SL003685	PBEF	cg19717193	0.00529296	0.00107619	1.22023e-06	-0.000245575	4.30948e-05	2.16934e-08	0.00462129	0.00110828	3.65018e-05	-2.73512	1.16241	0.0190483	0.1269	0.0296409
SL004362	SCGF-alpha	cg13403724	0.00342982	0.00091736	0.00020837	0.000802797	0.000212354	0.000177297	0.00385829	0.00092547	3.66219e-05	-0.533714	0.20075	0.00812264	0.124923	0.0296538
SL004137	EphA1	cg24920933	0.00620824	0.000845925	9.91408e-13	0.000333455	6.54021e-05	5.02259e-07	0.00572571	0.000865138	1.02252e-10	1.44707	0.601897	0.0166064	0.0777247	0.0296638
SL007631	SOST	cg13661908	0.0147447	0.00102169	3.49585e-39	-0.000340805	5.98846e-05	2.25676e-08	0.0141086	0.00105201	8.14217e-35	-1.86648	0.793292	0.0190542	0.0431412	0.02968
SL002505	ANP	cg15472170	0.00396435	0.00131945	0.00280631	-0.000783837	0.000101316	6.62002e-14	0.00504243	0.00139706	0.000341099	1.37539	0.607119	0.0239553	0.271943	0.0296946
SL010450	CD48	cg09765302	0.00545014	0.000606665	6.90733e-18	0.000472207	6.84653e-05	1.77582e-11	0.00500394	0.000634517	2.32223e-14	0.944916	0.412584	0.0224631	0.0818688	0.0297397
SL000414	Factor B	cg20891116	0.00161112	0.000502062	0.00142606	-0.000323204	5.94295e-05	8.78976e-08	0.0019131	0.000515512	0.000232004	0.934309	0.394053	0.0181555	0.18743	0.0297469
SL004821	S100A4	cg06759781	0.00224545	0.000907372	0.0136977	-0.00120804	0.000121774	3.88535e-21	0.0013116	0.000996004	0.188547	-0.77303	0.347054	0.0264075	1	0.029758
SL000414	Factor B	cg23533285	0.00161112	0.000502062	0.00142606	-0.00043192	0.000122401	0.000460039	0.00183857	0.00050523	0.000305059	0.526597	0.190913	0.00604465	0.141173	0.0297676
SL005102	SHBG	cg26282123	0.00429326	0.00120378	0.000399889	-0.000272808	7.74304e-05	0.000469062	0.00375017	0.00121126	0.00208156	-1.99076	0.721253	0.00600995	0.126499	0.0297965
SL005200	MICB	cg13378486	0.00502956	0.00119425	3.05953e-05	-0.000395404	8.71783e-05	7.35732e-06	0.00440451	0.00121413	0.000318407	-1.58079	0.63863	0.013677	0.124275	0.0297975
SL010470	Semaphorin 3E	cg00922200	0.0080889	0.00113961	4.87857e-12	-0.00054022	8.14746e-05	9.47906e-11	0.00727901	0.00118771	1.92272e-09	-1.49917	0.651958	0.0219289	0.100123	0.029814
SL003916	kallikrein 12	cg20674839	0.00482181	0.00104947	5.61842e-06	-0.000205745	6.1342e-05	0.000862606	0.00528773	0.00105412	7.56202e-07	2.26452	0.794133	0.00454804	0.0966264	0.0298161
SL010391	WFKN2	cg02919799	0.001754	0.000714473	0.014461	0.000599812	0.000101361	6.4079e-09	0.00129481	0.000737704	0.0798968	0.765557	0.327777	0.0199437	1	0.0298175
SL014028	ENTP5	cg18638434	0.00206414	0.000598382	0.000613612	-0.000317763	0.000112981	0.00512695	0.00179797	0.000596596	0.00272445	-0.837641	0.244901	0.00068171	0.12895	0.0298262
SL005215	Siglec-3	cg15497724	0.00357818	0.00103526	0.000598896	0.000431933	0.000139441	0.00207143	0.00312487	0.00103673	0.00272087	1.04951	0.344563	0.00245449	0.126689	0.0298686
SL000062	PSA	cg26638975	0.0052903	0.00161788	0.00115699	-0.000315977	8.70411e-05	0.000315138	0.00602898	0.00162974	0.000242462	2.33778	0.862584	0.00697709	0.13963	0.0298757
SL004915	NCC27	cg26805346	-0.0071386	0.00266416	0.0076389	-0.000340932	9.61902e-05	0.000434013	-0.00593489	0.00268135	0.0273635	3.53066	1.28503	0.00624207	0.168621	0.0298939
SL001800	TNF sR-II	cg18216918	0.00807845	0.000674283	5.93877e-29	0.000429545	0.000107396	7.39804e-05	0.00775429	0.000681756	1.46885e-26	0.75466	0.291884	0.0100338	0.0401265	0.0299077
SL000507	Lymphotoxin a1/b2	cg25013052	-0.00313023	0.000605886	3.57809e-07	-0.000344085	4.79857e-05	3.04321e-12	-0.00266839	0.000636281	3.30066e-05	1.34223	0.589227	0.0231937	0.147542	0.029929
SL000507	Lymphotoxin a1/b2	cg25013052	-0.00313023	0.000605886	3.57809e-07	-0.000344085	4.79857e-05	3.04321e-12	-0.00266839	0.000636281	3.30066e-05	1.34223	0.589227	0.0231937	0.147542	0.029929
SL000316	C4	cg26720073	0.00345375	0.000902977	0.000149105	-0.000716684	0.000106207	4.57576e-11	0.00410564	0.000942684	1.64428e-05	0.909591	0.396729	0.0223202	0.188748	0.0299428
SL000316	C4	cg26720073	0.00345375	0.000902977	0.000149105	-0.000716684	0.000106207	4.57576e-11	0.00410564	0.000942684	1.64428e-05	0.909591	0.396729	0.0223202	0.188748	0.0299428
SL008591	TFF1	cg03253268	0.013346	0.00177516	2.951e-13	0.000500244	0.00012098	4.2243e-05	0.0142154	0.00179722	1.96076e-14	-1.73794	0.681547	0.0110978	0.0651427	0.0299728
SL018946	UB2G2	cg27328431	0.00397553	0.000668281	5.38202e-09	0.000545347	0.000136877	7.87989e-05	0.00365484	0.000675605	1.02216e-07	0.588046	0.227222	0.00996285	0.0806657	0.0299831
SL004269	ghrelin	cg00605982	-0.00437141	0.0011237	0.000115087	0.000736527	9.63905e-05	1.28136e-13	-0.00527745	0.00118812	1.12104e-05	1.23016	0.543476	0.0240754	0.207265	0.0299859
SL014008	FUT5	cg10130497	0.00729715	0.00101363	2.50156e-12	-0.000209965	4.59928e-05	6.42117e-06	0.00782755	0.00103073	1.7618e-13	2.52613	1.02414	0.0140064	0.0726857	0.03
SL000064	Kallikrein 7	cg19564512	-0.0039735	0.000825654	2.02678e-06	-0.000380772	9.49838e-05	7.12324e-05	-0.00357677	0.00083487	2.23711e-05	1.0419	0.40369	0.0101639	0.0998429	0.0300007
SL005797	PIGR	cg23916516	-0.00549963	0.000986487	4.25475e-08	-0.000269322	4.58503e-05	8.23545e-09	-0.00486765	0.0010183	2.37158e-06	2.34659	1.00485	0.0199657	0.114915	0.0300028
SL000440	Hemopexin	cg14039925	0.00569168	0.00179685	0.00163982	-0.000160625	4.99965e-05	0.00140755	0.00647889	0.00180198	0.000359118	4.90087	1.66547	0.00341992	0.138308	0.0300093
SL000414	Factor B	cg19142682	0.00161112	0.000502062	0.00142606	0.000353119	5.9562e-05	6.0457e-09	0.00128732	0.000518571	0.0134091	0.916978	0.393256	0.02015	0.200979	0.0300103
SL009045	ENPP7	cg10409248	0.00535713	0.00178297	0.00280503	0.000277014	5.0487e-05	6.7832e-08	0.00428252	0.0018315	0.019804	3.87925	1.64199	0.0185687	0.200594	0.0300124
SL006522	LG3BP	cg19413066	0.00311453	0.000973194	0.00146818	-0.00117882	9.78327e-05	3.10639e-29	0.00431803	0.00111216	0.000118602	1.02094	0.462869	0.0279038	0.386417	0.0300354
SL005188	IL-5 Ra	cg10159529	0.00552817	0.00103406	1.42231e-07	-0.000185655	4.81559e-05	0.000132161	0.00504182	0.00104404	1.8748e-06	-2.61961	0.998063	0.00896397	0.0879754	0.030036
SL003177	sICAM-2	cg11849086	0.0018218	0.000677025	0.00738736	-0.000118118	3.40146e-05	0.000564565	0.00151844	0.000680911	0.0262325	-2.56829	0.924297	0.00568404	0.166517	0.0300392
SL000316	C4	cg16175906	0.00345375	0.000902977	0.000149105	-0.000362945	6.12858e-05	6.26972e-09	0.0040354	0.000932598	1.86003e-05	1.60258	0.687392	0.0201696	0.16841	0.0300568
SL000316	C4	cg16175906	0.00345375	0.000902977	0.000149105	-0.000362945	6.12858e-05	6.26972e-09	0.0040354	0.000932598	1.86003e-05	1.60258	0.687392	0.0201696	0.16841	0.0300568
SL014983	H2B2E	cg15654264	0.00458629	0.00119316	0.000138323	-0.000496737	0.000138166	0.000359485	0.00512895	0.00120155	2.39493e-05	1.09244	0.401593	0.00677256	0.118322	0.0300607
SL011448	TNR4	cg15487867	0.00234817	0.000846543	0.00576874	0.000148569	3.14895e-05	3.1771e-06	0.00189227	0.000862378	0.0287257	3.06861	1.25622	0.0149586	0.194151	0.030065
SL007173	GRN	cg05040893	0.00157572	0.000535651	0.00343083	-0.000143001	4.17852e-05	0.000677039	0.00133651	0.000538455	0.0134208	-1.67279	0.596489	0.0052574	0.15181	0.0300725
SL003872	gp130, soluble	cg21919257	0.0028064	0.000418181	5.7399e-11	-0.000150462	4.60997e-05	0.00118164	0.00262255	0.00041963	9.453e-10	-1.22189	0.420928	0.00387705	0.0655102	0.0300775
SL003184	sLeptin R	cg26304237	0.00473148	0.00175927	0.00741871	0.00142078	0.000128184	1.89639e-25	0.00674039	0.0019733	0.000692849	-1.41395	0.639291	0.0274798	0.424584	0.0300844
SL005200	MICB	cg06358108	0.00502956	0.00119425	3.05953e-05	-0.000196715	4.52156e-05	1.67757e-05	0.00563549	0.00121186	4.35269e-06	3.08026	1.23114	0.0127015	0.120474	0.0300913
SL003323	PARC	cg05323725	0.0148163	0.00109077	1.49279e-35	0.00043919	5.99466e-05	1.07545e-12	0.0156604	0.00114772	8.42597e-36	-1.92187	0.8464	0.0236336	0.0569685	0.0300934
SL002093	Histone H2A.z	cg22548714	0.0030263	0.00108793	0.00563278	-0.00049969	8.60266e-05	1.18647e-08	0.0037162	0.00112213	0.00100139	1.38066	0.590633	0.0198426	0.227969	0.0301149
SL000451	HSP 70	cg04880558	0.00621418	0.000753224	1.69622e-15	-0.000209171	3.11395e-05	5.50838e-11	0.00567499	0.000785818	2.16001e-12	-2.57777	1.12506	0.0224036	0.0867685	0.0301163
SL002525	C2	cg10714284	0.00222251	0.000451497	1.19681e-06	-7.441e-05	2.3294e-05	0.00149868	0.00242049	0.000452708	1.42181e-07	2.66071	0.901055	0.00331156	0.0890808	0.0301316
SL002525	C2	cg20770572	0.00222251	0.000451497	1.19681e-06	0.0013625	0.000452641	0.00275677	0.00241975	0.00045164	1.34274e-07	-0.144765	0.0463181	0.00188913	0.0887473	0.0301513
SL005200	MICB	cg27529346	0.00502956	0.00119425	3.05953e-05	-0.000409992	9.43007e-05	1.69885e-05	0.00442426	0.00121183	0.000291744	-1.47638	0.590313	0.0127353	0.120349	0.0301657
SL015728	GCKR	cg24594459	0.00271435	0.00101874	0.00798639	-0.000721618	7.96317e-05	3.81909e-18	0.00175224	0.00110205	0.112534	-1.33326	0.597145	0.0260541	1	0.0301671
SL004915	NCC27	cg22261911	-0.0071386	0.00266416	0.0076389	-0.000145607	3.24982e-05	9.41976e-06	-0.00576462	0.00270678	0.0337307	9.43624	3.80931	0.0136042	0.192472	0.0301679
SL000616	Vitronectin	cg00286909	-0.00219761	0.000789008	0.00557036	-0.0005668	6.30594e-05	6.66684e-18	-0.00293541	0.000852202	0.000624976	-1.3017	0.582755	0.0259873	0.335729	0.0301769
SL004351	IL-17E	cg21807240	0.00208913	0.000858421	0.0153278	-0.000302622	3.79229e-05	1.19119e-14	0.00280764	0.000912222	0.00221099	2.37427	1.05418	0.0247816	0.343926	0.0301916
SL010470	Semaphorin 3E	cg12862820	0.0080889	0.00113961	4.87857e-12	-0.000173062	5.33759e-05	0.00127253	0.00758877	0.00114332	9.09976e-11	-2.88989	0.991723	0.00374406	0.0618292	0.0302103
SL004139	Ephrin-A3	cg19406511	-0.00165059	0.000598347	0.00603867	-0.000221282	3.75017e-05	7.07055e-09	-0.00203396	0.000617777	0.0010708	-1.73249	0.743568	0.0202443	0.232262	0.0302246
SL000316	C4	cg11381564	0.00345375	0.000902977	0.000149105	0.000399213	0.0001084	0.000258404	0.00303883	0.000910176	0.00091096	1.03937	0.387895	0.00764101	0.120139	0.0302575
SL000316	C4	cg11381564	0.00345375	0.000902977	0.000149105	0.000399213	0.0001084	0.000258404	0.00303883	0.000910176	0.00091096	1.03937	0.387895	0.00764101	0.120139	0.0302575
SL004625	ADAMTS-4	cg19240319	0.00257071	0.000794847	0.00130879	0.000801029	0.000239622	0.000897734	0.00292278	0.000798356	0.000280862	-0.439524	0.154476	0.00463882	0.136955	0.0302583
SL005221	SREC-I	cg15806857	0.00427715	0.000998574	2.2455e-05	0.000547679	0.000124704	1.39749e-05	0.00478472	0.00101364	3.1357e-06	-0.926759	0.37206	0.0130965	0.118669	0.0302606
SL003916	kallikrein 12	cg25594486	0.00482181	0.00104947	5.61842e-06	0.000562777	0.00017808	0.00168108	0.0043641	0.00105188	3.98676e-05	0.813305	0.273336	0.00308077	0.0949247	0.0302842
SL000616	Vitronectin	cg08806622	-0.00219761	0.000789008	0.00557036	-0.000385781	6.59877e-05	9.57762e-09	-0.00169677	0.000814036	0.0376804	1.29825	0.556623	0.0201157	0.227902	0.0302858
SL008591	TFF1	cg15108590	0.013346	0.00177516	2.951e-13	0.000903596	8.58343e-05	2.35062e-23	0.0114213	0.00196993	1.25434e-08	2.12997	0.962282	0.0273595	0.144211	0.0303041
SL000251	a2-HS-Glycoprotein	cg12820191	-0.00197401	0.000394954	8.2825e-07	-9.04675e-05	2.33176e-05	0.000120022	-0.00216054	0.000398902	9.90001e-08	-2.06187	0.789898	0.00934616	0.094494	0.03033
SL002684	CSF-1	cg00297950	0.00316027	0.000726803	1.69535e-05	0.000827025	0.00016012	3.60245e-07	0.00274258	0.000743981	0.000254981	0.505051	0.211708	0.0174604	0.132169	0.0303303
SL004626	ADAMTS-5	cg08781584	0.0115425	0.00084479	7.42823e-36	-0.000247825	8.55148e-05	0.00393648	0.0119127	0.000843677	8.68768e-38	1.4937	0.458308	0.00120138	0.0320706	0.0303353
SL005764	sCD163	cg17029786	0.00783328	0.000903022	7.28559e-17	0.000436287	8.85863e-05	1.18009e-06	0.00733483	0.000921794	1.4008e-14	1.14248	0.473837	0.0162971	0.0636322	0.0303469
SL010378	RET	cg15436174	-0.0087511	0.000979307	1.00469e-17	0.000149814	3.50723e-05	2.3637e-05	-0.0082618	0.000992941	1.02895e-15	-3.26602	1.30004	0.0123415	0.0559125	0.0303502
SL010514	PTK6	cg04630848	0.00667897	0.00115642	1.42119e-08	-0.000338841	9.56073e-05	0.00043461	0.00615773	0.001164	1.90319e-07	-1.5383	0.562444	0.00648106	0.078042	0.0303686
SL011068	IL-17 RC	cg03776870	0.00565176	0.00063303	1.08824e-17	-0.000257107	4.52776e-05	2.43218e-08	0.00604538	0.000651952	7.49769e-19	1.53095	0.65366	0.019608	0.069645	0.0303743
SL003324	Coagulation Factor X	cg01435643	-0.00218226	0.000534049	5.17964e-05	-0.00121702	0.000176131	1.64134e-11	-0.0017901	0.000558745	0.00145162	0.322232	0.141342	0.0230816	0.179705	0.0303875
SL004362	SCGF-alpha	cg18614779	0.00342982	0.00091736	0.00020837	0.000143159	4.05746e-05	0.000460564	0.00301788	0.00092322	0.00116147	2.87749	1.05016	0.00638404	0.120105	0.0304563
SL000057	Thymidine kinase	cg14652587	0.00177453	0.000727702	0.0151299	-0.00113755	0.000213571	1.58178e-07	0.00134541	0.000746356	0.0721112	-0.377234	0.159281	0.0182869	1	0.030459
SL014092	CDON	cg00373707	-0.00511678	0.000546807	3.66651e-19	0.00102416	9.86017e-05	7.77203e-23	-0.00570123	0.000605242	2.25202e-19	0.570656	0.258036	0.0274928	0.11422	0.0305372
SL004146	IL-1 R4	cg00674896	0.0042602	0.00113063	0.000186101	0.000466919	6.45919e-05	2.06238e-12	0.00512272	0.00118815	1.98858e-05	-1.84726	0.81513	0.023906	0.202461	0.0305841
SL003201	VEGF sR2	cg12630714	-0.00271309	0.00048045	2.86954e-08	0.000359387	5.97879e-05	3.7675e-09	-0.00302434	0.000496678	2.40869e-09	0.866051	0.373714	0.0209221	0.114721	0.030596
SL000414	Factor B	cg16236263	0.00161112	0.000502062	0.00142606	-0.000526083	7.63656e-05	1.87821e-11	0.0019787	0.000525186	0.000186516	0.698714	0.306807	0.0232282	0.228152	0.0305962
SL014091	SORC2	cg05887630	-0.0112039	0.00170032	1.23542e-10	-0.000284261	5.09696e-05	4.22149e-08	-0.0122461	0.00174927	9.30893e-12	-3.66629	1.56305	0.0194301	0.0930201	0.0306066
SL008381	CATF	cg04174538	0.00476149	0.000668676	4.22755e-12	-0.000535229	0.000106535	7.29142e-07	0.00513716	0.000683456	3.03745e-13	0.701901	0.293049	0.0170178	0.0788993	0.0306155
SL006922	RAD51	cg10620100	0.0023141	0.000643963	0.000361909	-9.85122e-05	3.20557e-05	0.00224554	0.00259412	0.000644791	6.72684e-05	2.84249	0.934363	0.00248525	0.121006	0.0306173
SL000316	C4	cg08509427	0.00345375	0.000902977	0.000149105	-0.000127501	4.68059e-05	0.00669732	0.00385841	0.000898896	2.16233e-05	3.17371	0.893079	0.000419682	0.117162	0.0306228
SL000316	C4	cg08509427	0.00345375	0.000902977	0.000149105	-0.000127501	4.68059e-05	0.00669732	0.00385841	0.000898896	2.16233e-05	3.17371	0.893079	0.000419682	0.117162	0.0306228
SL009213	Cathepsin A	cg07668993	0.00561815	0.00126385	1.10258e-05	-0.00113843	0.000102334	1.30653e-25	0.00706002	0.00141845	9.15085e-07	1.26655	0.574676	0.0280271	0.256645	0.0306249
SL005200	MICB	cg22235293	0.00502956	0.00119425	3.05953e-05	-0.000610263	0.000198535	0.00224031	0.00554823	0.0011958	4.56993e-06	0.849912	0.279481	0.00249412	0.103124	0.0306306
SL002525	C2	cg04528352	0.00222251	0.000451497	1.19681e-06	-0.000403653	5.43485e-05	5.52269e-13	0.00257614	0.000475941	1.00719e-07	0.876077	0.387714	0.0243196	0.159113	0.0306363
SL005207	NKp46	cg02251027	0.00249152	0.000718363	0.000573988	-0.000629485	0.000115351	7.9988e-08	0.00205917	0.000737996	0.00549099	-0.686823	0.291782	0.0190071	0.173527	0.0306651
SL010288	Carbonic anhydrase 6	cg00690929	-0.00821013	0.00144937	2.60996e-08	-0.00065636	7.8951e-05	1.07268e-15	-0.00695399	0.00154833	8.98166e-06	1.9138	0.855001	0.0256795	0.152999	0.0306654
SL005173	IL-10 Ra	cg10513118	0.00233681	0.000465393	7.37574e-07	-0.000478905	6.55605e-05	1.24558e-12	0.00269502	0.000489611	6.19201e-08	0.747971	0.330576	0.0241281	0.153289	0.0306703
SL004843	Ephrin-A2	cg11409275	0.00445075	0.000487123	2.14635e-18	0.000171369	3.96869e-05	1.93463e-05	0.00420576	0.000494187	2.55961e-16	1.42963	0.572765	0.0129144	0.0550455	0.0306985
SL003182	Integrin aVb5	cg16531585	0.00343001	0.000804446	2.44607e-05	0.000170385	6.93772e-05	0.0144259	0.0030174	0.000792788	0.000160607	2.42165	0.532778	7.04685e-06	0.120295	0.0307191
SL000011	AFP	cg26132084	0.00236909	0.000945251	0.0125472	0.000186831	3.54361e-05	2.08367e-07	0.00291905	0.000968752	0.00272925	-2.94366	1.2429	0.0182829	0.232143	0.0307401
SL005173	IL-10 Ra	cg08983011	0.00233681	0.000465393	7.37574e-07	-0.000405235	9.25665e-05	1.48753e-05	0.00257215	0.000472388	8.48268e-08	0.580749	0.233866	0.0133771	0.10071	0.030776
SL000509	Lymphotoxin b R	cg10124440	0.00263633	0.000807293	0.00117448	-0.00040632	6.24134e-05	1.98392e-10	0.00319724	0.000840077	0.000160625	1.38047	0.60292	0.0224995	0.212763	0.0307772
SL008623	CNTN2	cg03537215	0.00612979	0.000933543	1.403e-10	-0.000188679	4.53268e-05	3.7591e-05	0.00658562	0.000945506	1.14825e-11	2.41591	0.956782	0.011906	0.0743631	0.0308585
SL002525	C2	cg12743359	0.00222251	0.000451497	1.19681e-06	-0.000208443	6.32733e-05	0.00106358	0.00242024	0.000453294	1.47814e-07	0.948576	0.331921	0.0044615	0.0889644	0.03087
SL005200	MICB	cg16055052	0.00502956	0.00119425	3.05953e-05	-0.000170458	6.68449e-05	0.0110973	0.00446024	0.00118285	0.000184269	-3.33993	0.823712	5.90653e-05	0.113194	0.030878
SL000414	Factor B	cg27014438	0.00161112	0.000502062	0.00142606	-0.00230537	0.000254317	3.73029e-18	0.00208329	0.000543172	0.000143078	0.20481	0.092152	0.0267401	0.293065	0.0308821
SL003703	BFL1	cg23906060	0.00278461	0.000777311	0.000377291	0.000633293	0.000146133	1.80712e-05	0.00317594	0.000788724	6.63156e-05	-0.617919	0.248226	0.0131558	0.140531	0.0308837
SL008609	FCG3B	cg06649737	0.00495986	0.000788631	7.45671e-10	0.00068088	0.000138646	1.26342e-06	0.00452722	0.000804944	3.24964e-08	0.635415	0.264413	0.0166534	0.0872286	0.0308858
SL000316	C4	cg11468089	0.00345375	0.000902977	0.000149105	-0.000122458	4.23267e-05	0.00399703	0.00384667	0.000901871	2.43141e-05	3.20861	0.989841	0.00127635	0.113766	0.0308915
SL000316	C4	cg11468089	0.00345375	0.000902977	0.000149105	-0.000122458	4.23267e-05	0.00399703	0.00384667	0.000901871	2.43141e-05	3.20861	0.989841	0.00127635	0.113766	0.0308915
SL014248	SEM6B	cg21488876	0.00345497	0.000619906	4.27699e-08	-0.000270367	7.4973e-05	0.000344951	0.00373481	0.000624403	4.47411e-09	1.03507	0.384157	0.00731181	0.0809992	0.0308921
SL003739	DcR3	cg02052956	0.00269907	0.00097099	0.00566673	-0.000602128	0.000117982	4.91044e-07	0.00214794	0.000993355	0.0311173	-0.915303	0.384278	0.0176367	0.204192	0.0308984
SL007310	RAC3	cg09562790	-0.00562849	0.00230917	0.0151709	0.000317603	0.000107416	0.00326967	-0.00662565	0.00230864	0.00429589	3.13964	0.994823	0.00170528	0.177163	0.0309485
SL018548	a1-Antichymotrypsin	cg07785447	0.00337759	0.00064868	2.91427e-07	0.000335908	5.11646e-05	1.41964e-10	0.00383161	0.000675584	2.52234e-08	-1.35162	0.591631	0.0227987	0.134422	0.0309538
SL010391	WFKN2	cg04198042	0.001754	0.000714473	0.014461	-0.000648294	8.15372e-05	1.45807e-14	0.00234631	0.000758863	0.00211066	0.913637	0.40766	0.0254942	0.337688	0.0309967
SL008623	CNTN2	cg26271435	0.00612979	0.000933543	1.403e-10	-0.00107145	0.000124198	1.04243e-16	0.00696454	0.00100221	1.27257e-11	0.77908	0.349717	0.0263838	0.136178	0.0310068
SL008574	OMD	cg21194517	0.00365383	0.00103152	0.000437506	-0.000844239	0.00011583	1.38285e-12	0.00286406	0.00108486	0.00857343	-0.935483	0.414276	0.0244095	0.216149	0.0310082
SL002762	CgA	cg17319795	0.0111745	0.00390015	0.00435989	-0.000550928	0.000116189	2.83492e-06	0.0132562	0.00397368	0.000919239	3.77855	1.56024	0.0158328	0.186291	0.0310245
SL007674	LY9	cg00160981	0.00223361	0.000754654	0.00323832	-0.000864813	0.000100927	1.61385e-16	0.0015632	0.0008094	0.0540629	-0.775202	0.347885	0.0263442	1	0.0310368
SL008158	H31	cg03858673	0.00770477	0.00115235	6.71583e-11	0.000690623	0.000133671	3.57107e-07	0.00704652	0.00117963	4.68689e-09	0.953133	0.401672	0.0180632	0.0854348	0.0310559
SL008835	ASGR1	cg07308381	0.00378884	0.000825355	5.72401e-06	-0.000355203	6.13423e-05	1.30803e-08	0.00327133	0.000851066	0.000138382	-1.45695	0.627067	0.0205953	0.136589	0.0310579
SL011809	XTP3A	cg16519923	0.0047245	0.000700749	4.75873e-11	-0.00105874	0.000105878	2.07609e-21	0.00544754	0.000770798	5.99939e-12	0.682929	0.309301	0.0277465	0.153041	0.0310807
SL004180	CD30	cg17745097	0.00299945	0.000702285	2.36963e-05	-0.000494112	6.05328e-05	3.22772e-15	0.00359692	0.000748571	2.10452e-06	1.20918	0.540935	0.025879	0.199193	0.0310863
SL009948	PLXB2	cg18399427	0.00426742	0.000568541	3.20803e-13	-0.000490738	6.61198e-05	5.6638e-13	0.00382515	0.000599101	4.2235e-10	-0.901233	0.400013	0.0247318	0.103638	0.0310938
SL008631	DSC2	cg19056593	0.00699782	0.000584003	5.94826e-29	0.0001541	3.47677e-05	1.16932e-05	0.00670042	0.000593151	2.97709e-26	1.92991	0.782253	0.0139879	0.0424989	0.0311096
SL010514	PTK6	cg21721340	0.00667897	0.00115642	1.42119e-08	-0.00107578	0.000133327	6.3467e-15	0.0057059	0.00123083	4.65162e-06	-0.904517	0.404406	0.0257927	0.145691	0.0311323
SL003785	GAPDH, liver	cg12216208	0.00744038	0.00266461	0.00545254	0.000609169	0.000121868	8.23667e-07	0.00596131	0.00272238	0.0290477	2.42802	1.01646	0.0173129	0.19879	0.0311421
SL002644	ERBB1	cg19752855	-0.00330091	0.000366261	5.60552e-18	0.0011084	0.000140838	2.61238e-14	-0.00360241	0.000388681	7.65264e-19	0.272007	0.121383	0.0255146	0.0913364	0.0311427
SL000497	Laminin	cg24721630	0.00574291	0.00106975	1.26467e-07	-0.000236254	4.22555e-05	3.88379e-08	0.00509336	0.00110032	4.7948e-06	-2.74938	1.17724	0.0199517	0.113105	0.0311617
SL004915	NCC27	cg19108771	-0.0071386	0.00266416	0.0076389	-0.000821341	0.000178443	5.40535e-06	-0.00574876	0.00271048	0.0344652	1.69217	0.693897	0.0151224	0.194694	0.0311711
SL000248	a1-Antichymotrypsin	cg02264229	0.00132386	0.000356623	0.000230811	0.00107158	0.000101996	2.84838e-23	0.0017081	0.000395701	1.94452e-05	-0.358577	0.162872	0.028195	0.290244	0.0311791
SL010451	CFC1	cg26797073	0.00272526	0.00106382	0.0107328	-0.000184964	3.44119e-05	1.22223e-07	0.00335049	0.00109147	0.00227028	3.38031	1.43743	0.0191151	0.229422	0.0312048
SL003332	MMP-17	cg18597677	0.00214594	0.000896659	0.0171028	-0.000330913	5.78616e-05	1.94044e-08	0.00270175	0.000923805	0.00362139	1.67962	0.722213	0.0204753	0.259005	0.031213
SL004016	CXCL16, soluble	cg25422405	0.00374449	0.00051959	2.40083e-12	0.00112194	0.000111936	1.69321e-21	0.00320821	0.00057167	3.485e-08	0.477996	0.216694	0.0278945	0.143219	0.0312167
SL005200	MICB	cg06025456	0.00502956	0.00119425	3.05953e-05	-0.000935586	0.000166449	3.31802e-08	0.00429921	0.00122904	0.000514904	-0.780639	0.334735	0.0201314	0.145212	0.0312353
SL006544	BGH3	cg00513205	0.00649287	0.000525424	1.8573e-30	0.000487778	0.000142496	0.00067495	0.00626113	0.000528276	1.99634e-28	0.475084	0.171422	0.00580987	0.0356908	0.0312423
SL007674	LY9	cg14969185	0.00223361	0.000754654	0.00323832	-0.000321454	5.67453e-05	2.60366e-08	0.00177064	0.000776902	0.0231213	-1.44023	0.618441	0.0203045	0.207273	0.0312479
SL004859	GITR	cg20185617	0.00272492	0.00112582	0.015897	-0.000347353	7.73972e-05	9.13682e-06	0.00214489	0.00114429	0.0615164	-1.66985	0.680415	0.0144984	1	0.0312994
SL014129	H6ST1	cg09681043	0.00162972	0.000412872	9.14699e-05	-0.00122984	0.000113258	1.34473e-24	0.00208802	0.000461057	7.57971e-06	0.372656	0.169632	0.0285324	0.281219	0.0313008
SL000062	PSA	cg17761772	0.0052903	0.00161788	0.00115699	-0.000464369	9.05608e-05	4.3364e-07	0.00620516	0.00165533	0.000200639	1.97012	0.830598	0.018109	0.172932	0.0313372
SL005183	IL-22BP	cg03301848	-0.00446704	0.000838101	1.54639e-07	0.000982926	0.000105349	4.58992e-19	-0.0036612	0.000910575	6.78774e-05	-0.819845	0.370565	0.0274326	0.180398	0.0313404
SL010460	FCG2B	cg19900821	0.00516571	0.00181186	0.00455433	-0.000729941	0.000127554	1.89817e-08	0.00628595	0.00186658	0.000822263	1.53471	0.660576	0.0206017	0.216862	0.0313464
SL004625	ADAMTS-4	cg10701110	0.00257071	0.000794847	0.00130879	-0.000497837	6.76339e-05	8.65252e-13	0.00318599	0.000837199	0.000160935	1.23592	0.549104	0.0248776	0.239346	0.031365
SL000414	Factor B	cg20928974	0.00161112	0.000502062	0.00142606	-0.000568145	7.96051e-05	3.79028e-12	0.00198864	0.000527053	0.000182575	0.664466	0.294351	0.0244579	0.234317	0.0313737
SL000678	Granulysin	cg00710862	0.00543645	0.00107012	5.49814e-07	-0.000698001	0.000151037	4.96266e-06	0.00487741	0.00108895	9.48677e-06	-0.800917	0.329305	0.0153926	0.102832	0.031375
SL008177	C1QBP	cg22305258	0.00140131	0.000526571	0.00805964	-0.000401022	9.04547e-05	1.16237e-05	0.00166838	0.000534805	0.00192553	0.665952	0.270525	0.0141962	0.190579	0.0313829
SL005200	MICB	cg01016122	0.00502956	0.00119425	3.05953e-05	-0.000679389	9.26042e-05	1.01459e-12	0.00410904	0.00125731	0.00116481	-1.35492	0.601904	0.0248593	0.183022	0.0313945
SL008835	ASGR1	cg02493798	0.00378884	0.000825355	5.72401e-06	0.000749202	0.000228178	0.00110448	0.00343005	0.000828612	4.14818e-05	0.478899	0.168082	0.00458178	0.094697	0.0314015
SL010450	CD48	cg15549973	0.00545014	0.000606665	6.90733e-18	0.000558458	9.05673e-05	1.53963e-09	0.00505023	0.000628468	8.03549e-15	0.716103	0.311888	0.0221273	0.0733768	0.031421
SL000316	C4	cg03694466	0.00345375	0.000902977	0.000149105	-0.000657728	0.000156976	3.35209e-05	0.00389594	0.000914932	2.50622e-05	0.67229	0.26812	0.0125096	0.12803	0.03143
SL000316	C4	cg03694466	0.00345375	0.000902977	0.000149105	-0.000657728	0.000156976	3.35209e-05	0.00389594	0.000914932	2.50622e-05	0.67229	0.26812	0.0125096	0.12803	0.03143
SL002525	C2	cg14261401	0.00222251	0.000451497	1.19681e-06	-0.000339762	0.000108523	0.00185567	0.00241713	0.000452486	1.45791e-07	0.572796	0.193397	0.0032193	0.087565	0.0314325
SL000414	Factor B	cg25522795	0.00161112	0.000502062	0.00142606	-0.000321901	0.0001027	0.00183357	0.00182756	0.000503184	0.00031332	0.672366	0.227254	0.00325133	0.134338	0.0314348
SL009089	PGCB	cg26614154	-0.00286269	0.000829285	0.000608306	0.000277697	7.36137e-05	0.000183022	-0.0032439	0.000836768	0.000121471	1.37274	0.524192	0.00911931	0.133163	0.0314585
SL000024	TF	cg09162146	0.00604793	0.000732148	1.59486e-15	0.000415702	6.83056e-05	2.4617e-09	0.0055698	0.000757801	9.30146e-13	1.15017	0.500149	0.0219211	0.0790562	0.0314608
SL006910	Cathepsin V	cg02740582	-0.0126718	0.000843692	1.06594e-41	0.000687196	7.20678e-05	9.06421e-20	-0.013501	0.000920243	3.64461e-40	1.20674	0.546506	0.0277359	0.0654423	0.0314618
SL000451	HSP 70	cg07912416	0.00621418	0.000753224	1.69622e-15	0.000293161	6.03482e-05	1.63213e-06	0.00662225	0.000768406	1.11986e-16	-1.39195	0.580209	0.0168376	0.0656667	0.0314735
SL003300	HCC-4	cg10157715	0.00776231	0.000935563	1.21686e-15	0.000804177	0.000109184	8.3391e-13	0.00703978	0.000985274	3.59835e-12	0.898467	0.399491	0.024988	0.0930815	0.0314773
SL014009	HDGR2	cg14068489	0.00433966	0.000955934	7.21352e-06	-0.000119327	4.09798e-05	0.00376868	0.00475078	0.000955226	9.33077e-07	3.44535	1.0804	0.00152627	0.0947366	0.0315321
SL004915	NCC27	cg03236802	-0.0071386	0.00266416	0.0076389	0.00164298	0.000113418	2.03082e-39	-0.0110437	0.0032041	0.000619874	2.37681	1.09317	0.0301996	0.547033	0.031543
SL000057	Thymidine kinase	cg11546131	0.00177453	0.000727702	0.0151299	0.000884042	6.52667e-05	2.46699e-35	0.000770131	0.000859026	0.370454	1.13615	0.521706	0.029941	1	0.0315444
SL000507	Lymphotoxin a1/b2	cg04182226	-0.00313023	0.000605886	3.57809e-07	-0.000637358	8.213e-05	5.6308e-14	-0.00263915	0.000641917	4.66898e-05	0.770494	0.344333	0.025729	0.156883	0.0315517
SL000507	Lymphotoxin a1/b2	cg04182226	-0.00313023	0.000605886	3.57809e-07	-0.000637358	8.213e-05	5.6308e-14	-0.00263915	0.000641917	4.66898e-05	0.770494	0.344333	0.025729	0.156883	0.0315517
SL001729	G-CSF	cg15636887	0.0020619	0.000708174	0.00377332	-0.00048274	8.33719e-05	1.31372e-08	0.00161845	0.000730358	0.0271897	-0.918594	0.39675	0.0210427	0.215065	0.0315711
SL014983	H2B2E	cg09808343	0.00458629	0.00119316	0.000138323	-0.000282754	5.60877e-05	6.6824e-07	0.00392022	0.00121975	0.00140232	-2.35567	0.991163	0.0178825	0.145231	0.0315751
SL000678	Granulysin	cg15854001	0.00543645	0.00107012	5.49814e-07	-0.000370795	8.00929e-05	4.77953e-06	0.00487753	0.00108907	9.50191e-06	-1.50735	0.621008	0.0155983	0.10281	0.0315773
SL000414	Factor B	cg17772649	0.00161112	0.000502062	0.00142606	-0.000534214	0.000113867	3.59161e-06	0.00187677	0.000511345	0.000271087	0.49727	0.205613	0.0159782	0.164884	0.0315821
SL005207	NKp46	cg08217733	0.00249152	0.000718363	0.000573988	0.000190388	6.62946e-05	0.00427317	0.00280301	0.000717387	0.000107695	-1.63613	0.504954	0.0012832	0.125024	0.0316207
SL007674	LY9	cg08535938	0.00223361	0.000754654	0.00323832	-0.000559859	6.51084e-05	1.28713e-16	0.00156345	0.000809829	0.0541522	-1.19702	0.539293	0.0269359	1	0.0316219
SL000064	Kallikrein 7	cg17110052	-0.0039735	0.000825654	2.02678e-06	0.000578899	9.19297e-05	7.11184e-10	-0.0034206	0.000856711	7.60958e-05	-0.95509	0.417748	0.0226943	0.139147	0.031632
SL004683	Noggin	cg13948956	-0.00278895	0.00114699	0.0154195	-0.000307793	9.01793e-05	0.000699521	-0.0032924	0.00115317	0.00449926	-1.63569	0.591327	0.0059033	0.180518	0.0316342
SL003328	Factor I	cg04676482	0.00288155	0.000441516	1.79569e-10	0.000436049	9.47974e-05	5.48685e-06	0.00265164	0.000449232	7.00105e-09	0.527264	0.216942	0.0154659	0.079788	0.0316414
SL003643	Glutathione S-transferase Pi	cg15121288	0.00745587	0.0014225	2.43742e-07	0.000132045	4.95372e-05	0.00795748	0.00809089	0.00141479	1.94055e-08	-4.80917	1.32429	0.000313674	0.0851713	0.0316478
SL000507	Lymphotoxin a1/b2	cg18340416	-0.00313023	0.000605886	3.57809e-07	-0.000614533	8.8436e-05	1.28122e-11	-0.0026863	0.000634371	2.77308e-05	0.722391	0.319747	0.0243406	0.141821	0.0316697
SL000507	Lymphotoxin a1/b2	cg18340416	-0.00313023	0.000605886	3.57809e-07	-0.000614533	8.8436e-05	1.28122e-11	-0.0026863	0.000634371	2.77308e-05	0.722391	0.319747	0.0243406	0.141821	0.0316697
SL003182	Integrin aVb5	cg04583043	0.00343001	0.000804446	2.44607e-05	0.000143118	5.97787e-05	0.0170646	0.00300043	0.000789984	0.000165694	3.0016	0.616339	1.54442e-06	0.125242	0.0316707
SL014470	BCAR3	cg21298593	-0.00256645	0.000741917	0.000592659	7.2892e-05	2.64274e-05	0.00604577	-0.00289082	0.000739434	0.000106564	4.4501	1.29948	0.000671636	0.126391	0.0317063
SL000507	Lymphotoxin a1/b2	cg10750010	-0.00313023	0.000605886	3.57809e-07	-0.000444318	6.88367e-05	2.78359e-10	-0.00271452	0.000630124	2.02152e-05	0.935611	0.410748	0.0232011	0.132805	0.031714
SL000507	Lymphotoxin a1/b2	cg10750010	-0.00313023	0.000605886	3.57809e-07	-0.000444318	6.88367e-05	2.78359e-10	-0.00271452	0.000630124	2.02152e-05	0.935611	0.410748	0.0232011	0.132805	0.031714
SL010517	STK16	cg01329789	0.00233295	0.000731003	0.00151345	-0.00124458	0.000114844	1.66275e-24	0.0031424	0.000816357	0.000135406	0.650382	0.296843	0.0289585	0.346967	0.0317498
SL005115	Spondin-1	cg13254934	0.00796517	0.000626428	6.33753e-32	-0.000376365	8.0716e-05	4.10006e-06	0.008294	0.000637779	4.15247e-33	0.873718	0.361127	0.0159354	0.0412844	0.0317502
SL006694	CNDP1	cg12975230	-0.00676071	0.0017294	0.000106567	0.000650388	7.93561e-05	2.51677e-15	-0.00822816	0.00184395	1.02249e-05	2.25628	1.01395	0.0265532	0.217056	0.0317548
SL003643	Glutathione S-transferase Pi	cg11169848	0.00745587	0.0014225	2.43742e-07	0.000467627	0.000134818	0.000572664	0.00682981	0.00143097	2.44879e-06	1.33879	0.489576	0.0064885	0.0839681	0.0317562
SL010519	ZAP70	cg19932515	0.00425238	0.000835343	5.23873e-07	-0.00041219	0.000104004	8.58662e-05	0.00464698	0.000844544	6.28035e-08	0.957308	0.374678	0.0109442	0.0927933	0.0317585
SL000678	Granulysin	cg00352005	0.00543645	0.00107012	5.49814e-07	-0.000421819	7.38221e-05	1.98995e-08	0.0047775	0.00110236	1.80295e-05	-1.56217	0.67414	0.0209292	0.121211	0.0317603
SL003332	MMP-17	cg18846954	0.00214594	0.000896659	0.0171028	-0.000286662	6.37041e-05	8.64001e-06	0.00168676	0.000911398	0.0648557	-1.60183	0.655577	0.014929	1	0.0317722
SL002525	C2	cg12259379	0.00222251	0.000451497	1.19681e-06	-0.000464268	0.000164406	0.00495251	0.002418	0.000450547	1.28056e-07	0.42107	0.127363	0.00102119	0.0879589	0.0317747
SL014009	HDGR2	cg03757250	0.00433966	0.000955934	7.21352e-06	0.000777907	8.28802e-05	2.94823e-19	0.00341785	0.00103963	0.00108866	1.18498	0.537268	0.0279125	0.212414	0.0317866
SL010450	CD48	cg08390254	0.00545014	0.000606665	6.90733e-18	-0.000549078	6.02302e-05	2.46772e-18	0.00488111	0.000656743	5.31644e-13	-1.03634	0.469182	0.0276834	0.104407	0.0318163
SL000316	C4	cg24631162	0.00345375	0.000902977	0.000149105	-0.00050467	0.000115795	1.62176e-05	0.00390633	0.000916526	2.4642e-05	0.89677	0.363554	0.0140056	0.131038	0.0318168
SL000316	C4	cg24631162	0.00345375	0.000902977	0.000149105	-0.00050467	0.000115795	1.62176e-05	0.00390633	0.000916526	2.4642e-05	0.89677	0.363554	0.0140056	0.131038	0.0318168
SL004363	SCGF-alpha	cg19564512	0.00377795	0.00100635	0.000196402	-0.000380504	9.50973e-05	7.35037e-05	0.00425421	0.00101776	3.49583e-05	1.25166	0.492085	0.0113012	0.126064	0.0318278
SL010514	PTK6	cg00237512	0.00667897	0.00115642	1.42119e-08	-0.000833146	0.000138214	3.43053e-09	0.00593263	0.00119602	9.95783e-07	-0.895809	0.389991	0.022072	0.111745	0.0318376
SL009045	ENPP7	cg18502099	0.00535713	0.00178297	0.00280503	-0.000959623	7.82288e-05	4.15137e-30	0.00313851	0.00204673	0.125864	-2.31197	1.06065	0.0297845	1	0.0318613
SL002517	TNF-a	cg04621664	0.00209346	0.00076135	0.00620318	-0.00015792	5.96444e-05	0.00838553	0.0024348	0.000756946	0.00138987	2.16147	0.590431	0.000280963	0.163051	0.0319218
SL002505	ANP	cg02570527	0.00396435	0.00131945	0.00280631	-0.000165229	3.04817e-05	9.64482e-08	0.00474297	0.0013547	0.000508983	4.71233	2.01725	0.0199239	0.196404	0.0319302
SL000451	HSP 70	cg01858458	0.00621418	0.000753224	1.69622e-15	-0.000316781	6.79648e-05	4.13347e-06	0.00660849	0.000766841	1.12278e-16	1.24473	0.51514	0.01607	0.0634529	0.0319388
SL016928	SLAF7	cg04263215	0.00621455	0.00127983	1.6553e-06	0.000142421	3.70578e-05	0.000138821	0.00562016	0.00129248	1.69708e-05	4.17347	1.61433	0.0100431	0.0956449	0.031945
SL005183	IL-22BP	cg25289569	-0.00446704	0.000838101	1.54639e-07	-0.000647415	7.70355e-05	5.51072e-16	-0.00373928	0.000896701	3.64622e-05	1.12411	0.506749	0.027027	0.16292	0.0319664
SL000509	Lymphotoxin b R	cg11808677	0.00263633	0.000807293	0.00117448	-0.000228546	3.64837e-05	8.66923e-10	0.00317441	0.000837456	0.000170556	2.35437	1.03147	0.0229175	0.204103	0.0319834
SL014008	FUT5	cg21311067	0.00729715	0.00101363	2.50156e-12	0.000238522	6.08761e-05	0.000102842	0.00682447	0.00102427	7.74719e-11	1.98173	0.773349	0.0107107	0.0647766	0.0319854
SL011809	XTP3A	cg27151174	0.0047245	0.000700749	4.75873e-11	-0.000121255	3.61131e-05	0.000852199	0.00502997	0.000704168	3.66307e-12	2.51925	0.903978	0.0055459	0.0646572	0.0319983
SL004355	LD78-beta	cg04264908	0.00688569	0.000751479	1.71511e-18	0.000238698	5.18462e-05	5.38013e-06	0.0064956	0.000764644	2.82731e-16	1.63426	0.674433	0.0157746	0.0566528	0.0320094
SL007310	RAC3	cg02186141	-0.00562849	0.00230917	0.0151709	-0.0006337	0.000138886	6.49261e-06	-0.00443908	0.00234855	0.0593719	1.87694	0.77278	0.0155332	1	0.032035
SL014009	HDGR2	cg04640886	0.00433966	0.000955934	7.21352e-06	0.000382951	6.28858e-05	2.40174e-09	0.00496047	0.000989377	7.6567e-07	-1.62112	0.707798	0.0224553	0.143055	0.032052
SL000451	HSP 70	cg06804823	0.00621418	0.000753224	1.69622e-15	-0.00153125	0.000164927	6.54522e-19	0.00549724	0.000817619	5.30887e-11	-0.468202	0.21251	0.0280789	0.115371	0.0320594
SL006119	TFF3	cg25033972	0.00965769	0.000817713	3.00979e-28	0.00016625	4.19814e-05	8.69842e-05	0.00927219	0.000826745	6.37186e-26	2.3188	0.909653	0.0111294	0.0399165	0.0320784
SL006029	Chitotriosidase-1	cg03448202	0.0168834	0.00151338	1.00338e-25	-0.000458876	8.93238e-05	4.13718e-07	0.0160299	0.00154875	1.08224e-22	-1.85983	0.788615	0.0187772	0.0505489	0.0320892
SL005629	NAGK	cg01717446	0.00332206	0.00115846	0.00432671	0.000347048	7.08945e-05	1.36372e-06	0.00269288	0.00118241	0.023221	1.81293	0.760498	0.0175395	0.189393	0.0320927
SL005207	NKp46	cg06367459	0.00249152	0.000718363	0.000573988	-0.000495362	7.83294e-05	6.13836e-10	0.00297658	0.000746082	7.72403e-05	0.979208	0.429856	0.0231952	0.194686	0.0320978
SL003869	MIC-1	cg19479654	0.0201903	0.000917482	1.02735e-73	-0.000536625	0.000171953	0.00191805	0.0197988	0.000919501	1.82047e-71	-0.729729	0.247517	0.00336047	0.019395	0.032105
SL007223	BCL6	cg01206912	0.00278614	0.00103217	0.0072078	0.000161996	4.12338e-05	9.86886e-05	0.00326983	0.00104323	0.00183427	-2.98581	1.16772	0.0108839	0.173605	0.0321092
SL010612	Dkk-4	cg13603914	0.00780882	0.00138916	3.29937e-08	-0.000485304	5.79945e-05	7.14944e-16	0.00900771	0.00148525	2.77196e-09	2.47039	1.11451	0.0271447	0.15353	0.0321398
SL001729	G-CSF	cg27075917	0.0020619	0.000708174	0.00377332	-0.000258647	4.96676e-05	2.9065e-07	0.00246674	0.000725412	0.000732274	1.56523	0.665864	0.0191671	0.196345	0.0321522
SL000678	Granulysin	cg21627466	0.00543645	0.00107012	5.49814e-07	-0.000236361	5.03079e-05	3.47419e-06	0.00487385	0.00108991	9.79773e-06	-2.38026	0.988781	0.0164677	0.103487	0.0321595
SL003869	MIC-1	cg04986579	0.0201903	0.000917482	1.02735e-73	0.00075844	0.000129172	8.31343e-09	0.0207675	0.00094702	2.59874e-73	-0.760929	0.330704	0.0218453	0.0285839	0.0321681
SL000658	GAS1	cg13823120	0.00499226	0.000526605	1.41239e-19	-0.000316463	9.55395e-05	0.000998801	0.00476429	0.000528928	5.86502e-18	-0.720376	0.256468	0.00518666	0.0456652	0.0321698
SL001990	IL-1Ra	cg00088972	0.00383632	0.000893455	2.1472e-05	0.000339563	9.11118e-05	0.000218217	0.00424194	0.000901195	3.34132e-06	-1.19454	0.456295	0.00914208	0.105732	0.0321763
SL012561	REG4	cg00808352	0.0112586	0.000970919	2.00552e-27	0.000266664	8.68225e-05	0.00225818	0.0116724	0.000972492	5.03725e-29	-1.55143	0.519188	0.00295818	0.0367461	0.0322117
SL002505	ANP	cg17468563	0.00396435	0.00131945	0.00280631	-0.000437559	7.36547e-05	5.63832e-09	0.00480325	0.00136319	0.000468882	1.91722	0.835	0.0221256	0.21161	0.0322198
SL000414	Factor B	cg07601645	0.00161112	0.000502062	0.00142606	-0.000408068	8.06008e-05	6.01007e-07	0.00189136	0.000513429	0.000257492	0.68675	0.290559	0.0185212	0.173942	0.0322206
SL016969	CSRP3	cg11169641	0.00668653	0.00135806	1.1882e-06	0.000591814	0.000119067	9.45623e-07	0.00594175	0.00138721	2.24674e-05	1.25847	0.530286	0.0180477	0.111385	0.0322254
SL001802	IFN-g	cg08748969	0.00222131	0.000820492	0.00703813	0.000754014	0.000190544	8.7936e-05	0.00260622	0.000829487	0.00178767	-0.51048	0.200448	0.011203	0.17328	0.0322306
SL002093	Histone H2A.z	cg26777345	0.0030263	0.00108793	0.00563278	-0.000249527	6.98021e-05	0.000388096	0.00254142	0.00109574	0.0208194	-1.94321	0.726579	0.00775555	0.160223	0.0322358
SL014270	CLM6	cg12448933	0.00642427	0.000666351	3.80702e-20	0.00124333	0.000132426	2.88107e-19	0.00578332	0.000724749	1.19788e-14	0.515514	0.234399	0.0283578	0.0997704	0.0322469
SL000316	C4	cg09018483	0.00345375	0.000902977	0.000149105	-0.000851281	0.000124816	2.90348e-11	0.00280553	0.000943783	0.00310951	-0.761475	0.337644	0.0245926	0.187688	0.0322554
SL000316	C4	cg09018483	0.00345375	0.000902977	0.000149105	-0.000851281	0.000124816	2.90348e-11	0.00280553	0.000943783	0.00310951	-0.761475	0.337644	0.0245926	0.187688	0.0322554
SL009045	ENPP7	cg06935666	0.00535713	0.00178297	0.00280503	0.000531835	5.70704e-05	4.98161e-19	0.00365625	0.00193657	0.059659	3.19814	1.45374	0.0283112	1	0.0322672
SL003916	kallikrein 12	cg06875740	0.00482181	0.00104947	5.61842e-06	-0.000361712	8.14206e-05	1.11676e-05	0.00429178	0.00106611	6.65316e-05	-1.46534	0.599694	0.0149244	0.109924	0.0322741
SL008609	FCG3B	cg00160981	0.00495986	0.000788631	7.45671e-10	-0.000864813	0.000100927	1.61385e-16	0.00426476	0.000845914	6.66691e-07	-0.803766	0.363578	0.0275505	0.140146	0.0323052
SL016969	CSRP3	cg09032137	0.00668653	0.00135806	1.1882e-06	-0.000412965	7.69379e-05	1.27093e-07	0.0058953	0.00139337	2.81303e-05	-1.91596	0.820819	0.0200173	0.118331	0.0323097
SL006910	Cathepsin V	cg01558241	-0.0126718	0.000843692	1.06594e-41	-0.000518866	0.000123248	3.07954e-05	-0.0122602	0.000855115	1.01085e-38	0.79322	0.319111	0.0132877	0.0324797	0.0323175
SL000344	Cathepsin D	cg17061505	0.00726572	0.00112617	2.85095e-10	-0.000344361	4.17734e-05	1.83104e-15	0.0082294	0.00120267	2.54644e-11	2.79845	1.2626	0.0271605	0.132633	0.0323215
SL000437	Haptoglobin, Mixed Type	cg00621574	0.00449151	0.00147632	0.00248235	-0.000568809	9.01632e-05	6.65527e-10	0.00350483	0.00153228	0.0226333	-1.73465	0.76246	0.0233654	0.219677	0.0323424
SL003324	Coagulation Factor X	cg12394800	-0.00218226	0.000534049	5.17964e-05	-7.50944e-05	2.30595e-05	0.00121186	-0.00195279	0.000536088	0.000300879	3.05579	1.07624	0.00472365	0.105153	0.0323463
SL014111	KIRR3	cg18226915	0.00229708	0.000749551	0.00230881	-0.000476336	6.37713e-05	4.13635e-13	0.00171398	0.000790632	0.0306875	-1.22415	0.548027	0.0259856	0.253846	0.0323474
SL004724	MOZ	cg00367281	0.002224	0.000831382	0.0077395	-0.000304087	6.32101e-05	2.04565e-06	0.00266876	0.000847816	0.00175287	1.46261	0.612111	0.0172792	0.199982	0.0323539
SL000414	Factor B	cg21462693	0.00161112	0.000502062	0.00142606	0.000507424	8.78942e-05	1.44219e-08	0.00129951	0.00051768	0.0124113	0.614114	0.266529	0.0216668	0.193416	0.0323569
SL000507	Lymphotoxin a1/b2	cg14996490	-0.00313023	0.000605886	3.57809e-07	-0.00032495	5.15212e-05	6.7407e-10	-0.00272454	0.000628937	1.82054e-05	1.24846	0.548802	0.0233788	0.129603	0.0323599
SL000507	Lymphotoxin a1/b2	cg14996490	-0.00313023	0.000605886	3.57809e-07	-0.00032495	5.15212e-05	6.7407e-10	-0.00272454	0.000628937	1.82054e-05	1.24846	0.548802	0.0233788	0.129603	0.0323599
SL014008	FUT5	cg22004069	0.00729715	0.00101363	2.50156e-12	0.000654236	7.40902e-05	2.23297e-17	0.00821565	0.00109192	2.84605e-13	-1.40393	0.63659	0.0279242	0.125871	0.032382
SL007674	LY9	cg10970143	0.00223361	0.000754654	0.00323832	-0.000451532	8.1711e-05	5.50776e-08	0.00178355	0.000775701	0.0219397	-0.996739	0.429502	0.0207433	0.201494	0.0323824
SL000678	Granulysin	cg22112075	0.00543645	0.00107012	5.49814e-07	-0.000666877	0.000134831	1.06533e-06	0.0048525	0.00109281	1.12739e-05	-0.875658	0.368998	0.0180537	0.107415	0.0323911
SL009045	ENPP7	cg23110019	0.00535713	0.00178297	0.00280503	-0.00049963	7.25972e-05	1.94665e-11	0.0040722	0.00186464	0.0294765	-2.57177	1.14254	0.0248649	0.239855	0.032403
SL000316	C4	cg12753631	0.00345375	0.000902977	0.000149105	-0.000369119	5.68527e-05	2.21242e-10	0.00407365	0.00093962	1.79342e-05	1.67938	0.741235	0.023943	0.179483	0.0324239
SL000316	C4	cg12753631	0.00345375	0.000902977	0.000149105	-0.000369119	5.68527e-05	2.21242e-10	0.00407365	0.00093962	1.79342e-05	1.67938	0.741235	0.023943	0.179483	0.0324239
SL000507	Lymphotoxin a1/b2	cg23538064	-0.00313023	0.000605886	3.57809e-07	-0.000284722	4.17438e-05	2.89619e-11	-0.00269572	0.000633277	2.52123e-05	1.52607	0.677417	0.0247496	0.13881	0.0324257
SL000507	Lymphotoxin a1/b2	cg23538064	-0.00313023	0.000605886	3.57809e-07	-0.000284722	4.17438e-05	2.89619e-11	-0.00269572	0.000633277	2.52123e-05	1.52607	0.677417	0.0247496	0.13881	0.0324257
SL005172	IGFBP-6	cg18054172	0.00755524	0.000703482	3.82194e-24	0.000473362	9.33511e-05	5.76848e-07	0.00716361	0.000719418	2.88479e-21	0.827341	0.350766	0.0187616	0.0518357	0.0324659
SL000658	GAS1	cg14276133	0.00499226	0.000526605	1.41239e-19	-0.000423854	6.18125e-05	2.30023e-11	0.00461296	0.000550692	6.84932e-16	-0.894883	0.397623	0.02489	0.0759776	0.0324884
SL004821	S100A4	cg17886303	0.00224545	0.000907372	0.0136977	-0.000561782	6.70449e-05	6.62256e-16	0.00302864	0.000970462	0.00191799	1.39411	0.630406	0.0274998	0.348789	0.0324976
SL008591	TFF1	cg09148268	0.013346	0.00177516	2.951e-13	0.000412109	8.59218e-05	2.18933e-06	0.0124006	0.00180992	2.37271e-11	2.29412	0.960465	0.0173201	0.0708398	0.0325092
SL004915	NCC27	cg00843339	-0.0071386	0.00266416	0.0076389	-0.000174829	5.07185e-05	0.000619052	-0.00597709	0.00267975	0.0262015	6.64371	2.43744	0.00666306	0.162709	0.0325136
SL005102	SHBG	cg03712541	0.00429326	0.00120378	0.000399889	0.0005016	6.78943e-05	7.11942e-13	0.00336913	0.00126798	0.00815806	1.84237	0.824895	0.0260023	0.215251	0.0325252
SL000382	CK-MB	cg00176863	-0.00766185	0.00165003	4.4849e-06	0.00150139	0.00014886	9.84895e-22	-0.00935773	0.00181695	3.8779e-07	1.12954	0.516375	0.0292171	0.221341	0.0325373
SL010450	CD48	cg13853198	0.00545014	0.000606665	6.90733e-18	0.000762386	8.94254e-05	2.2418e-16	0.00491813	0.000650376	2.20426e-13	0.69782	0.316006	0.0277239	0.0976138	0.032541
SL000316	C4	cg10812186	0.00345375	0.000902977	0.000149105	0.0014461	0.000240508	3.74876e-09	0.00287434	0.000933834	0.00221014	0.400675	0.175199	0.0226571	0.167764	0.032552
SL000316	C4	cg10812186	0.00345375	0.000902977	0.000149105	0.0014461	0.000240508	3.74876e-09	0.00287434	0.000933834	0.00221014	0.400675	0.175199	0.0226571	0.167764	0.032552
SL000522	MMP-12	cg22322158	0.0200129	0.00128758	4.6758e-44	-0.000239313	5.31513e-05	8.53106e-06	0.0193585	0.00130879	9.88861e-41	-2.73458	1.12595	0.0155379	0.0326999	0.0325534
SL000507	Lymphotoxin a1/b2	cg11754914	-0.00313023	0.000605886	3.57809e-07	-0.000302849	4.36851e-05	1.42265e-11	-0.00268975	0.000634266	2.70107e-05	1.45445	0.647334	0.0251305	0.140718	0.0325672
SL000507	Lymphotoxin a1/b2	cg11754914	-0.00313023	0.000605886	3.57809e-07	-0.000302849	4.36851e-05	1.42265e-11	-0.00268975	0.000634266	2.70107e-05	1.45445	0.647334	0.0251305	0.140718	0.0325672
SL005156	DAN	cg23606669	0.0103134	0.00102147	9.09315e-22	-0.000467809	0.000115577	6.07873e-05	0.0107979	0.00103363	4.8315e-23	1.03561	0.411476	0.0121851	0.0469743	0.0325726
SL010471	Testican-2	cg00661320	-0.0018078	0.000591953	0.00239149	0.000811848	0.000124585	1.92094e-10	-0.00139965	0.000616282	0.0236097	-0.502752	0.222233	0.0241544	0.225776	0.0325858
SL014008	FUT5	cg15150836	0.00729715	0.00101363	2.50156e-12	-0.000560856	0.000208774	0.00748469	0.00685392	0.00100906	3.44576e-11	-0.790273	0.224085	0.000463319	0.0607401	0.0325954
SL003184	sLeptin R	cg10381153	0.00473148	0.00175927	0.00741871	-0.000511642	7.07181e-05	1.9798e-12	0.0060573	0.00184921	0.00113473	2.5913	1.15865	0.0258026	0.280212	0.0326202
SL004362	SCGF-alpha	cg26522743	0.00342982	0.00091736	0.00020837	-0.000527302	0.000101562	3.13881e-07	0.00291003	0.000939417	0.00207068	-0.98575	0.420458	0.0194826	0.15155	0.0326209
SL000316	C4	cg22986222	0.00345375	0.000902977	0.000149105	-0.000655049	8.70595e-05	2.86267e-13	0.00416045	0.000953361	1.58264e-05	1.07884	0.484139	0.0263445	0.204617	0.0326273
SL000316	C4	cg22986222	0.00345375	0.000902977	0.000149105	-0.000655049	8.70595e-05	2.86267e-13	0.00416045	0.000953361	1.58264e-05	1.07884	0.484139	0.0263445	0.204617	0.0326273
SL000507	Lymphotoxin a1/b2	cg08135904	-0.00313023	0.000605886	3.57809e-07	-0.000492137	6.73184e-05	1.20578e-12	-0.00266833	0.000637691	3.43451e-05	0.938567	0.420102	0.0259599	0.147562	0.0326308
SL000507	Lymphotoxin a1/b2	cg08135904	-0.00313023	0.000605886	3.57809e-07	-0.000492137	6.73184e-05	1.20578e-12	-0.00266833	0.000637691	3.43451e-05	0.938567	0.420102	0.0259599	0.147562	0.0326308
SL002706	CD23	cg14964327	0.00419297	0.00104102	6.59734e-05	0.000134704	3.78024e-05	0.000404804	0.00465408	0.00104841	1.13505e-05	-3.42312	1.28242	0.00787402	0.109971	0.0326507
SL003643	Glutathione S-transferase Pi	cg23725454	0.00745587	0.0014225	2.43742e-07	-0.00107029	0.000165866	2.79961e-10	0.00842258	0.0014791	2.2186e-08	0.90322	0.398946	0.0240411	0.129658	0.032652
SL016928	SLAF7	cg03166324	0.00621455	0.00127983	1.6553e-06	-0.000290093	5.1242e-05	2.67475e-08	0.00543243	0.00131815	4.48487e-05	-2.69609	1.16921	0.021569	0.125852	0.0327165
SL002755	PAPP-A	cg13656878	0.00911549	0.00105524	9.73232e-17	0.000604423	0.000109237	5.31824e-08	0.00848516	0.00108498	3.71331e-14	1.04286	0.450721	0.021126	0.0691494	0.0327896
SL000507	Lymphotoxin a1/b2	cg27064867	-0.00313023	0.000605886	3.57809e-07	-0.000442391	8.71275e-05	5.58685e-07	-0.00279261	0.000619734	8.40904e-06	0.763176	0.324397	0.0190686	0.107859	0.0327935
SL000507	Lymphotoxin a1/b2	cg27064867	-0.00313023	0.000605886	3.57809e-07	-0.000442391	8.71275e-05	5.58685e-07	-0.00279261	0.000619734	8.40904e-06	0.763176	0.324397	0.0190686	0.107859	0.0327935
SL000507	Lymphotoxin a1/b2	cg15376677	-0.00313023	0.000605886	3.57809e-07	-0.00053278	7.62783e-05	1.01821e-11	-0.00268743	0.000634739	2.78118e-05	0.831121	0.370742	0.0254579	0.141461	0.0327993
SL000507	Lymphotoxin a1/b2	cg15376677	-0.00313023	0.000605886	3.57809e-07	-0.00053278	7.62783e-05	1.01821e-11	-0.00268743	0.000634739	2.78118e-05	0.831121	0.370742	0.0254579	0.141461	0.0327993
SL014248	SEM6B	cg22048922	0.00345497	0.000619906	4.27699e-08	-0.000339544	7.02531e-05	1.83818e-06	0.00312323	0.000632336	1.103e-06	-0.977016	0.410676	0.0177683	0.0960183	0.0328044
SL000316	C4	cg05841219	0.00345375	0.000902977	0.000149105	-0.00054571	0.000103057	1.85417e-07	0.003974	0.000925878	2.16461e-05	0.953333	0.408774	0.0201279	0.150631	0.0328154
SL000316	C4	cg05841219	0.00345375	0.000902977	0.000149105	-0.00054571	0.000103057	1.85417e-07	0.003974	0.000925878	2.16461e-05	0.953333	0.408774	0.0201279	0.150631	0.0328154
SL002621	Midkine	cg09989688	0.00475601	0.00146643	0.00126806	0.000118057	3.49792e-05	0.000800749	0.00538855	0.00147399	0.000286207	-5.35796	1.94499	0.00610808	0.132999	0.0328324
SL002525	C2	cg23574899	0.00222251	0.000451497	1.19681e-06	-0.000206157	6.39928e-05	0.00136639	0.00241525	0.000453089	1.54549e-07	0.934909	0.328208	0.00459173	0.0867208	0.0328453
[truncated: 1,531 more rows]

## Sheet: S file 1B
Supplementary file 1B. Association of age-associated at different age waves
	Age 41			Age 61			Age 78
SomaId	beta	p	B-H FDR	beta	p	B-H FDR	beta	p	B-H FDR	Target	EntrezGeneSymbol	UniProt
SL000001	-0.0796459	0.613856	0.926121	0.269076	0.0371896	0.155076	0.081844	0.452323	0.580347	MUC1	MUC1	P15941
SL000002	0.0940311	0.526338	0.905302	0.356791	0.00261836	0.0287264	0.438111	3.2932e-06	3.19735e-05	VEGF	VEGFA	P15692
SL000003	-0.010377	0.951542	0.986419	0.164157	0.196728	0.394973	0.122553	0.231531	0.356476	Angiogenin	ANG	P03950
SL000004	-0.29581	0.0877367	0.617002	-0.116759	0.405142	0.601015	-0.0899994	0.369438	0.498071	bFGF	FGF2	P09038
SL000006	0.319668	0.0903026	0.621767	-0.414801	0.00115505	0.016023	-0.373474	0.000244189	0.00144404	PAI-1	SERPINE1	P05121
SL000007	0.0785557	0.544592	0.905302	-0.443509	0.00247456	0.0277402	-0.174665	0.0801236	0.15512	ER	ESR1	P03372
SL000009	-0.049542	0.824787	0.95865	-0.184134	0.173522	0.365888	0.0387998	0.671984	0.766214	ERBB2	ERBB2	P04626
SL000011	0.0835491	0.491998	0.884965	-0.00237648	0.988203	0.991392	0.144456	0.196168	0.311571	AFP	AFP	P02771
SL000017	0.357716	0.0949281	0.621767	0.00378174	0.97797	0.990147	0.303563	0.00173539	0.0074268	vWF	VWF	P04275
SL000019	0.214887	0.185182	0.784784	-0.165152	0.146153	0.335353	-0.437343	3.19045e-06	3.12088e-05	Apo A-I	APOA1	P02647
SL000020	0.335365	0.0768553	0.58593	-0.00607368	0.962745	0.982499	0.0224842	0.823426	0.878495	Apo B	APOB	P04114
SL000021	0.288972	0.0222278	0.398389	-0.0210973	0.888589	0.943718	-0.271168	0.0113727	0.0329591	Insulin	INS	P01308
SL000022	0.0562026	0.782752	0.956992	0.0269827	0.839707	0.921128	0.114295	0.269645	0.400466	D-dimer	FGA FGB FGG	P02671 P02675 P02679
SL000024	0.331727	0.0194443	0.398389	0.533076	2.20825e-05	0.00068403	0.302055	0.00133579	0.00603427	TF	F3	P13726
SL000027	-0.0129163	0.921015	0.977323	-0.246111	0.073891	0.226313	-0.175008	0.104134	0.191084	COX-2	PTGS2	P35354
SL000038	0.140451	0.449037	0.881142	0.200172	0.165218	0.354701	0.0650962	0.507235	0.627421	MCP-1	CCL2	P13500
SL000039	0.297074	0.121731	0.683411	0.234711	0.119913	0.300013	0.361662	0.000377094	0.00203709	IL-8	CXCL8	P10145
SL000045	-0.166348	0.269065	0.797387	-0.0456175	0.724796	0.852585	-0.316438	0.00105294	0.00492759	IGFBP-3	IGFBP3	P17936
SL000047	-0.433239	0.0267686	0.415161	-0.0434717	0.747396	0.865862	-0.194709	0.0332696	0.076473	IGF-I	IGF1	P05019
SL000048	-0.37889	0.0082156	0.310825	-0.180743	0.169367	0.360044	-0.590555	8.67942e-09	1.42936e-07	Protein C	PROC	P04070
SL000049	0.303579	0.0874504	0.617002	-0.0532231	0.685263	0.826253	-0.324579	0.00141303	0.00629571	Protein S	PROS1	P07225
SL000051	0.311555	0.197602	0.784784	0.0170123	0.897295	0.949862	0.117681	0.170361	0.279496	CRP	CRP	P02741
SL000052	-0.160093	0.346078	0.829785	0.322951	0.0111509	0.0748605	0.679137	7.25973e-13	3.04675e-11	Troponin T	TNNT2	P45379
SL000053	0.204052	0.254564	0.784784	0.0239338	0.866917	0.936208	0.0657653	0.511236	0.630443	tPA	PLAT	P00750
SL000055	0.203789	0.228586	0.784784	-0.000384021	0.997583	0.997583	-0.152596	0.115679	0.208222	Cadherin E	CDH1	P12830
SL000057	-0.0534848	0.849373	0.967631	0.0300882	0.823877	0.91456	-0.0758393	0.353236	0.484196	Thymidine kinase	TK1	P04183
SL000062	0.167876	0.0681744	0.564445	0.188464	0.0142351	0.0841811	0.00492711	0.930329	0.953789	PSA	KLK3	P07288
SL000064	-0.156774	0.368566	0.833267	-0.386792	0.00214129	0.0246532	-0.143755	0.136889	0.235223	Kallikrein 7	KLK7	P49862
SL000070	0.138025	0.439471	0.877602	0.0731111	0.602066	0.767648	-0.107368	0.209617	0.328173	Glypican 3	GPC3	P51654
SL000074	-0.0362166	0.836922	0.962836	-0.0936722	0.494675	0.682473	-0.139082	0.160839	0.266223	p53	TP53	P04637
SL000076	0.0683826	0.784064	0.956992	0.203074	0.167256	0.358484	0.0370437	0.659667	0.756147	p27Kip1	CDKN1B	P46527
SL000084	0.0418657	0.786061	0.956992	-0.351042	0.00443416	0.0395126	-0.331266	0.000304892	0.00171716	EGF	EGF	P01133
SL000087	-0.0685287	0.743591	0.953575	-0.0716071	0.638808	0.789838	0.098053	0.231495	0.356476	IL-6	IL6	P05231
SL000088	0.331621	0.0656941	0.564445	-0.0473	0.697384	0.833147	-0.0525077	0.614758	0.722493	TGF-b2	TGFB2	P61812
SL000089	0.243635	0.0578939	0.550764	-0.0754833	0.566755	0.742547	-0.00310357	0.976707	0.984472	TGF-b3	TGFB3	P10600
SL000104	-0.166541	0.257126	0.784784	-0.0774486	0.590948	0.758271	-0.188233	0.0410107	0.0915178	Bcl-2	BCL2	P10415
SL000124	0.0776256	0.658563	0.935393	0.00337704	0.979422	0.990846	0.0899987	0.322355	0.453388	MMP-2	MMP2	P08253
SL000125	0.213341	0.123361	0.683411	-0.153796	0.2168	0.415401	-0.00955164	0.928206	0.953115	IL-1a	IL1A	P01583
SL000130	0.172089	0.172664	0.770312	0.103165	0.528361	0.712329	-0.00590235	0.954287	0.971461	Cyclin B1	CCNB1	P14635
SL000131	0.0159271	0.936048	0.980951	-0.426295	0.00156114	0.0195293	-0.0888494	0.393719	0.523216	PCNA	PCNA	P12004
SL000133	-0.0843536	0.729544	0.951894	-0.0449209	0.733303	0.859264	0.0255818	0.793887	0.857134	MIP-3a	CCL20	P78556
SL000134	-0.283174	0.0951252	0.621767	0.0345066	0.782645	0.893177	-0.0161618	0.862945	0.906127	Met	MET	P08581
SL000136	-0.0567721	0.704747	0.94814	-0.283963	0.0310102	0.139414	-0.168901	0.0485176	0.103478	AREG	AREG	P15514
SL000137	-0.343709	0.0199663	0.398389	-0.0896273	0.5357	0.717022	-0.0724193	0.495871	0.619125	BTC	BTC	P35070
SL000138	-0.0551457	0.588595	0.917955	-0.129015	0.4164	0.614911	-0.104904	0.21244	0.331803	HB-EGF	HBEGF	Q99075
SL000139	-0.337637	0.119864	0.683411	-0.104958	0.427217	0.624505	-0.00379975	0.968078	0.980132	EPI	EREG	O14944
SL000142	-0.0214895	0.926395	0.978758	0.0727116	0.621107	0.777729	0.128773	0.156621	0.261236	TS	TYMS	P04818
SL000145	-0.165526	0.288209	0.811558	-0.199679	0.141199	0.328623	-0.269745	0.00451143	0.0158632	IL-1 sRII	IL1R2	P27930
SL000158	0.0510966	0.794575	0.956992	0.0508865	0.676771	0.819928	0.170718	0.126018	0.222154	PSMA	FOLH1	Q04609
SL000164	-0.0207941	0.903896	0.977165	0.0428401	0.746956	0.865862	-0.0601151	0.503459	0.625597	Myoglobin	MB	P02144
SL000247	-0.474871	0.00387622	0.180106	-0.60889	8.71861e-08	1.13429e-05	-0.515707	9.68004e-14	4.84374e-12	6-Phosphogluconate dehydrogenase	PGD	P52209
SL000248	-0.209757	0.253476	0.784784	0.0787891	0.55525	0.733284	0.315316	0.00147582	0.00647396	a1-Antichymotrypsin	SERPINA3	P01011
SL000249	-0.0738968	0.666527	0.936721	-0.0857671	0.492185	0.680998	0.120286	0.259068	0.388752	a1-Antitrypsin	SERPINA1	P01009
SL000250	-0.364217	0.0247956	0.415161	-0.437713	8.39529e-05	0.00195041	-0.529977	5.02686e-09	9.08326e-08	a2-Antiplasmin	SERPINF2	P08697
SL000251	-0.280765	0.125546	0.683411	-0.199309	0.108063	0.281181	-0.327927	0.000368921	0.00200823	a2-HS-Glycoprotein	AHSG	P02765
SL000252	-0.242581	0.203714	0.784784	-0.0319831	0.812264	0.907866	0.139577	0.117002	0.209669	a2-Macroglobulin	A2M	P01023
SL000254	-0.147629	0.350138	0.829785	-0.0299124	0.828981	0.916084	-0.277603	0.00204447	0.00847087	Albumin	ALB	P02768
SL000268	-0.115943	0.55033	0.905302	-0.0894445	0.510359	0.698188	-0.307115	0.000849526	0.00415501	Angiostatin	PLG	P00747
SL000271	0.0842511	0.745718	0.953575	-0.162085	0.152472	0.339087	-0.0978255	0.300196	0.43269	Angiotensinogen	AGT	P01019
SL000272	-0.374964	0.0154867	0.366332	-0.264676	0.0125408	0.0795883	-0.0695314	0.479699	0.603567	Antithrombin III	SERPINC1	P01008
SL000276	0.614735	0.000555281	0.0602017	-0.0799949	0.546331	0.728255	-0.295668	0.00269784	0.0106039	Apo E	APOE	P02649
SL000277	0.36141	0.0259129	0.415161	-0.0473822	0.692356	0.831722	-0.155359	0.130152	0.228205	Apo E2	APOE	P02649
SL000280	0.148718	0.420898	0.867515	0.19484	0.160537	0.348678	0.0761104	0.420191	0.55379	GOT1	GOT1	P17174
SL000283	-0.0686304	0.558776	0.905314	0.586556	1.43902e-09	4.68042e-07	0.906593	1.21945e-24	3.96626e-22	b2-Microglobulin	B2M	P61769
SL000299	0.149908	0.476215	0.884965	-0.151098	0.282515	0.490724	-0.324367	0.000168741	0.00107089	b-ECGF	FGF1	P05230
SL000300	-0.188232	0.304047	0.821629	0.262076	0.0755914	0.229241	-0.157986	0.138381	0.236886	b-Endorphin	POMC	P01189
SL000305	-0.315633	0.161643	0.752952	0.258536	0.0408588	0.164494	0.129422	0.163266	0.269555	b-NGF	NGF	P01138
SL000306	-0.0663714	0.698476	0.94744	-0.0670125	0.606172	0.769395	0.0330584	0.728615	0.808868	BNP-32	NPPB	P16860
SL000308	0.0197479	0.913932	0.977323	0.122663	0.317082	0.52589	0.163736	0.0978795	0.182696	C1-Esterase Inhibitor	SERPING1	P05155
SL000309	-0.0232982	0.86395	0.970103	0.149108	0.239089	0.443978	0.100936	0.321053	0.452222	C1q	C1QA C1QB C1QC	P02745 P02746 P02747
SL000310	-0.183066	0.266308	0.792831	-0.0673852	0.581197	0.751628	-0.0997779	0.370475	0.498885	C1r	C1R	P00736
SL000312	0.157455	0.380234	0.836568	-0.176745	0.167953	0.359387	0.0530298	0.608972	0.718289	C3	C3	P01024
SL000313	0.109852	0.616553	0.926253	-0.0632282	0.631593	0.784499	0.0164654	0.875419	0.918484	C3a	C3	P01024
SL000314	0.243418	0.0457985	0.507205	-0.0480052	0.651754	0.799182	-0.364914	6.2498e-06	5.76666e-05	C3b	C3	P01024
SL000316	-0.0503354	0.806534	0.958029	0.0166643	0.902617	0.95092	0.147815	0.11964	0.21293	C4	C4A C4B	P0C0L4, P0C0L5
SL000318	-0.0414961	0.82412	0.95865	-0.0587267	0.667308	0.813653	-0.0193776	0.843337	0.892743	C4b	C4A C4B	P0C0L4 P0C0L5
SL000319	-0.0172814	0.923016	0.977323	-0.286952	0.052976	0.190919	0.0314713	0.729388	0.808868	C5	C5	P01031
SL000320	0.263844	0.0916874	0.621767	-0.0190543	0.888482	0.943718	-0.0103634	0.91329	0.942635	C5a	C5	P01031
SL000321	-0.0345862	0.854913	0.969613	-0.187509	0.175032	0.367286	-0.0475071	0.628763	0.731028	C5b, 6 Complex	C5 C6	P01031,P13671
SL000322	-0.0734426	0.604632	0.925025	-0.0281667	0.865812	0.936208	0.110206	0.327103	0.457101	C6	C6	P13671
SL000323	-0.224372	0.226601	0.784784	0.329479	0.013261	0.0821917	0.676176	1.65563e-11	5.38493e-10	C7	C7	P10643
SL000324	-0.0665196	0.730712	0.951894	0.0758868	0.55401	0.732487	0.0490489	0.597896	0.708436	C8	C8A C8B C8G	P07357,P07358,P07360
SL000325	-0.199571	0.323177	0.829785	0.188727	0.161602	0.350381	0.475255	1.87608e-07	2.23925e-06	C9	C9	P02748
SL000337	-0.168476	0.238505	0.784784	-0.250635	0.0402172	0.162999	-0.287038	0.000557421	0.00283754	Calpain I	CAPN1 CAPNS1	P07384 P04632
SL000338	0.150797	0.485666	0.884965	0.141542	0.319744	0.527233	0.191755	0.0416904	0.0923688	Calpastatin	CAST	P20810
SL000339	0.0344699	0.837034	0.962836	-0.0330597	0.822657	0.913986	-0.0804503	0.401533	0.533055	carbonic anhydrase II	CA2	P00918
SL000342	-0.0590016	0.737748	0.953575	-0.163206	0.228939	0.430418	-0.115603	0.239364	0.363375	Catalase	CAT	P04040
SL000343	0.143365	0.3513	0.829785	-0.0241465	0.838891	0.921011	0.37138	0.000252231	0.00147816	Cathepsin B	CTSB	P07858
SL000344	0.090337	0.600991	0.92364	0.158563	0.182293	0.377649	0.0279609	0.800535	0.861242	Cathepsin D	CTSD	P07339
SL000345	-0.253594	0.335729	0.829785	-0.353712	0.00503779	0.0436945	-0.148006	0.115986	0.208351	Cathepsin G	CTSG	P08311
SL000346	0.233409	0.18901	0.784784	0.147253	0.318525	0.52589	0.111962	0.195863	0.311512	Cathepsin H	CTSH	P09668
SL000347	-0.0697813	0.649116	0.935393	-0.0495072	0.733776	0.859264	-0.0681861	0.504372	0.626134	CBG	SERPINA6	P08185
SL000357	-0.027363	0.853035	0.969613	0.212906	0.1179	0.296115	0.0518388	0.611481	0.720556	Coagulation Factor IX	F9	P00740
SL000358	0.0753328	0.629873	0.934576	0.0138219	0.90295	0.95092	-0.152375	0.133251	0.232385	Coagulation Factor VII	F7	P08709
SL000360	0.160988	0.270132	0.798731	-0.13904	0.270673	0.478033	-0.443213	3.09425e-06	3.08247e-05	Coagulation Factor X	F10	P00742
SL000377	-0.00392147	0.985344	0.996081	0.0571088	0.705436	0.838915	0.0482259	0.64831	0.747078	CK-BB	CKB	P12277
SL000382	-0.200632	0.155481	0.747588	-0.291297	0.0166435	0.0929322	-0.540778	2.34742e-09	4.62726e-08	CK-MB	CKB CKM	P12277 P06732
SL000383	-0.129969	0.414421	0.862755	-0.278663	0.0270608	0.12896	-0.558288	4.95549e-10	1.21643e-08	CK-MM	CKM	P06732
SL000384	-0.2484	0.344633	0.829785	0.10061	0.389483	0.585092	0.0686875	0.46481	0.594037	CTLA-4	CTLA4	P16410
SL000396	0.293485	0.25542	0.784784	-0.021191	0.856311	0.930505	0.0593557	0.549004	0.665042	Cytochrome c	CYCS	P99999
SL000398	-0.15364	0.263312	0.78571	-0.2877	0.0194494	0.10328	-0.222999	0.00703055	0.0226966	Cytochrome P450 3A4	CYP3A4	P08684
SL000401	-0.199974	0.102924	0.651314	-0.0689689	0.60527	0.769395	-0.170315	0.104774	0.191975	Elastase	ELANE	P08246
SL000403	0.17719	0.430084	0.873695	0.169445	0.150516	0.336612	0.412504	1.8279e-05	0.000155431	Endostatin	COL18A1	P39060
SL000406	0.343503	0.0681344	0.564445	0.184146	0.168325	0.359591	0.335266	0.000377354	0.00203709	Eotaxin	CCL11	P51671
SL000408	0.461763	0.0223291	0.398389	0.185736	0.169124	0.360044	0.232145	0.0166536	0.044575	Epo	EPO	P01588
SL000409	-0.0243758	0.874328	0.971392	-0.15675	0.201798	0.39839	-0.249955	0.00273144	0.0107036	ERK-1	MAPK3	P27361
SL000414	0.00240428	0.989525	0.996735	-0.0860669	0.48495	0.677247	-0.223896	0.0222638	0.0563526	Factor B	CFB	P00751
SL000415	0.0646784	0.755901	0.953575	-0.23219	0.07332	0.226313	-0.295507	0.00254348	0.0101817	Factor H	CFH	P08603
SL000420	0.500323	0.00320626	0.160436	-0.00173968	0.988344	0.991392	-0.114106	0.236335	0.360459	Ferritin	FTH1 FTL	P02794 P02792
SL000424	0.0355406	0.846488	0.96672	-0.0899126	0.400535	0.59622	0.2233	0.0410924	0.0915431	Fibrinogen	FGA FGB FGG	P02671 P02675 P02679
SL000426	0.34634	0.06297	0.556022	-0.169636	0.203672	0.400268	-0.238021	0.0185575	0.0485052	Fibronectin	FN1	P02751
SL000427	-0.0415082	0.792794	0.956992	0.503293	1.58665e-05	0.00054322	0.519261	1.04814e-08	1.70097e-07	Fractalkine/CX3CL-1	CX3CL1	P78423
SL000428	0.694023	4.22702e-06	0.00549935	0.0504613	0.460199	0.658656	-0.0162638	0.784517	0.853391	FSH	CGA FSHB	P01215, P01225
SL000433	-0.00946296	0.962946	0.990539	0.333973	0.0114573	0.0752823	0.209935	0.0375042	0.0849222	Glucagon	GCG	P01275
SL000437	0.131257	0.378717	0.836568	-0.011429	0.933141	0.969328	-0.024795	0.808213	0.866336	Haptoglobin, Mixed Type	HP	P00738
SL000440	-0.0431159	0.839959	0.963656	0.126813	0.357343	0.561258	-0.119018	0.235633	0.359811	Hemopexin	HPX	P02790
SL000441	-0.436339	0.18705	0.784784	0.232558	0.0562249	0.197699	0.0317453	0.73596	0.813693	HGF	HGF	P14210
SL000442	0.25559	0.249081	0.784784	0.123255	0.38956	0.585092	-0.124827	0.234374	0.359153	HGH	GH1	P01241
SL000448	-0.163035	0.298553	0.819509	0.0146579	0.905224	0.95129	-0.203414	0.0191796	0.0498058	HSP 27	HSPB1	P04792
SL000449	-0.0648545	0.678497	0.939069	-0.251602	0.0509642	0.187834	-0.345516	6.20008e-05	0.000474488	HSP 40	DNAJB1	P25685
SL000450	-0.036433	0.790839	0.956992	-0.105116	0.384724	0.582162	-0.0984935	0.242216	0.366849	HSP 60	HSPD1	P10809
SL000451	-0.0353319	0.877192	0.971599	0.288951	0.0138181	0.0832286	0.29459	0.00209922	0.0086701	HSP 70	HSPA1A	P0DMV8
SL000454	-0.109794	0.452051	0.882267	-0.272681	0.0249451	0.124343	-0.226832	0.00551853	0.0186969	HSP 90b	HSP90AB1	P08238
SL000455	-0.106122	0.613369	0.926121	0.139676	0.341588	0.546897	0.0540506	0.570815	0.683192	c-Jun	JUN	P05412
SL000456	-0.144721	0.467536	0.884965	-0.250147	0.0677787	0.223514	-0.255825	0.00806436	0.0252813	iC3b	C3	P01024
SL000458	0.18336	0.318501	0.829785	0.395479	0.00808179	0.0595846	0.283442	0.00511353	0.0176464	IFN-g R1	IFNGR1	P15260
SL000459	-0.331199	0.0596908	0.550764	0.25166	0.0605291	0.207779	0.427818	1.97748e-05	0.000167058	IgA	IGHA1 IGHA2	P01876 P01877
SL000460	-0.502337	0.0203785	0.398389	-0.0656527	0.640041	0.790032	-0.111482	0.24065	0.364901	IgD	IGHD IGK@ IGL@	P01880
SL000461	-0.408592	0.0346044	0.450203	-0.0219052	0.86817	0.936208	0.0495927	0.616749	0.723526	IgE	IGHE IGK@ IGL@	P01854
SL000462	-0.733685	0.0018727	0.116018	0.404158	0.00147243	0.0191563	0.489492	2.45834e-09	4.77359e-08	IGFBP-1	IGFBP1	P08833
SL000466	-0.273505	0.0410426	0.489876	0.586317	1.16437e-08	2.16407e-06	0.962686	2.53785e-29	1.65087e-26	IGFBP-2	IGFBP2	P18065
SL000467	-0.0642434	0.598751	0.922956	0.0338814	0.793029	0.898258	0.245541	0.0158976	0.0431791	IgG	IGHG1 IGHG2 IGHG3 IGHG4 IGK@ IGL@	P01857
SL000468	-0.0551211	0.77866	0.956992	-0.187275	0.162398	0.350381	0.0259018	0.794601	0.857194	IgM	IGHM IGJ IGK@ IGL@	P01871
SL000470	0.0479497	0.786879	0.956992	-0.198825	0.137272	0.324652	0.0698241	0.474841	0.600357	IL-11	IL11	P20809
SL000474	-0.177245	0.249877	0.784784	-0.208854	0.105423	0.27877	0.0186703	0.841452	0.892743	IL-16	IL16	Q14005
SL000478	0.137583	0.48424	0.884965	-0.0372126	0.787166	0.895526	-0.0934684	0.308022	0.437696	IL-2	IL2	P60568
SL000479	-0.334756	0.233789	0.784784	-0.0966775	0.449819	0.647362	-0.034329	0.73053	0.808868	IL-3	IL3	P08700
SL000480	-0.100456	0.526059	0.905302	-0.31257	0.0275626	0.130396	-0.258305	0.00691592	0.0223821	IL-4	IL4	P05112
SL000481	0.0894127	0.53447	0.905302	0.107714	0.50158	0.691266	-0.16006	0.141614	0.240836	IL-5	IL5	P05113
SL000483	-0.0694254	0.550842	0.905302	-0.484464	0.00698733	0.054431	-0.081915	0.273415	0.404409	IL-7	IL7	P13232
SL000485	-0.0808035	0.573505	0.91373	0.178344	0.16217	0.350381	0.132218	0.233813	0.359139	IL-9	IL9	P15248
SL000493	-0.174452	0.253479	0.784784	-0.278204	0.0304429	0.138878	-0.235216	0.0055335	0.0186989	LDH-H 1	LDHB	P07195
SL000496	-0.0284289	0.866437	0.970103	-0.232956	0.0632963	0.214014	-0.274651	0.00783324	0.0247355	Lactoferrin	LTF	P02788
SL000497	0.403264	0.047134	0.511011	-0.128815	0.324075	0.532698	-0.169654	0.0742548	0.145271	Laminin	LAMA1 LAMB1 LAMC1	P25391, P07942, P11047
SL000498	0.325674	0.011635	0.354764	-0.142235	0.150526	0.336612	-0.312768	0.000117713	0.000801807	Leptin	LEP	P41159
SL000506	0.410828	0.017551	0.393687	-0.187878	0.0633322	0.214014	-0.0562262	0.4744	0.600357	Luteinizing hormone	CGA LHB	P01215, P01229
SL000507	0.0377108	0.806066	0.958029	-0.175522	0.147269	0.335546	-0.182616	0.0551348	0.114769	Lymphotoxin a1/b2	LTA LTB	P01374, Q06643
SL000508	-0.153227	0.36142	0.830949	0.0318551	0.810648	0.906982	0.0164554	0.85815	0.903279	Lymphotoxin a2/b1	LTA LTB	P01374, Q06643
SL000509	0.0793235	0.682324	0.940364	0.33996	0.00775417	0.057978	0.212504	0.0201886	0.0521375	Lymphotoxin b R	LTBR	P36941
SL000510	-0.00825674	0.957896	0.989851	0.0178051	0.88653	0.943718	0.38904	2.34286e-05	0.000191702	Lysozyme	LYZ	P61626
SL000515	0.00568174	0.976475	0.993356	-0.0503225	0.679756	0.821899	0.215463	0.0429711	0.0942748	MCP-2	CCL8	P80075
SL000516	0.195262	0.194879	0.784784	0.336776	0.0304581	0.138878	0.277136	0.00445422	0.0157045	MCP-3	CCL7	P80098
SL000517	0.112057	0.575894	0.91482	0.113735	0.370462	0.569033	-0.0242059	0.815936	0.87369	MCP-4	CCL13	Q99616
SL000519	0.359314	0.0432612	0.493709	0.161057	0.203309	0.400159	0.355119	0.0002566	0.00149034	MIP-1a	CCL3	P10147
SL000521	0.0470191	0.772712	0.956992	0.000796314	0.995317	0.996849	0.0996832	0.30817	0.437696	MMP-1	MMP1	P03956
SL000522	0.328111	0.00988006	0.338262	0.495006	1.45616e-05	0.000512018	0.71928	4.90374e-17	3.54432e-15	MMP-12	MMP12	P39900
SL000523	-0.0850373	0.527809	0.905302	0.104273	0.490327	0.680998	0.11131	0.30417	0.435821	MMP-13	MMP13	P45452
SL000524	0.973979	0.000687285	0.0644384	0.0180275	0.886133	0.943718	-0.153516	0.0860497	0.16415	MMP-3	MMP3	P08254
SL000525	0.208206	0.224805	0.784784	-0.0242565	0.849963	0.927757	0.504111	1.66476e-07	2.05796e-06	MMP-7	MMP7	P09237
SL000526	0.186178	0.30819	0.821629	-0.167215	0.219911	0.418766	-0.198304	0.0416929	0.0923688	MMP-8	MMP8	P22894
SL000527	-0.049279	0.80452	0.958029	-0.013315	0.921836	0.9633	-0.16733	0.102878	0.189314	MMP-9	MMP9	P14780
SL000528	0.0707307	0.711957	0.948961	-0.286579	0.0259218	0.127261	-0.189672	0.037695	0.0851411	NADPH-P450 Oxidoreductase	POR	P16435
SL000530	-0.0435162	0.804032	0.958029	0.140885	0.360028	0.562175	0.158164	0.141324	0.240658	OSM	OSM	P13725
SL000532	-0.211685	0.257875	0.784784	-0.324739	0.016716	0.0929384	-0.247871	0.0134874	0.0379808	ON	SPARC	P09486
SL000535	-0.167592	0.338038	0.829785	-0.30742	0.0229188	0.118323	-0.17648	0.0793087	0.153771	PDGF-AA	PDGFA	P04085
SL000537	-0.15531	0.340182	0.829785	-0.26861	0.0405461	0.163821	-0.230302	0.0216495	0.0551783	PDGF-BB	PDGFB	P01127
SL000539	-0.068036	0.669331	0.936843	-0.176927	0.154013	0.341929	-0.162278	0.0596743	0.123428	PHI	GPI	P06744
SL000540	0.237002	0.342867	0.829785	-0.438527	0.00154672	0.0195293	-0.160092	0.0617158	0.126409	Plasmin	PLG	P00747
SL000541	-0.209573	0.244269	0.784784	-0.185637	0.159212	0.34696	-0.307925	0.00234819	0.00954686	Plasminogen	PLG	P00747
SL000542	-0.162842	0.380341	0.836568	-0.113713	0.337085	0.544104	0.0730604	0.405991	0.537876	gpIIbIIIa	ITGA2B ITGB3	P08514 P05106
SL000545	-0.16128	0.367133	0.833267	-0.374869	0.00332674	0.0327885	-0.501555	1.46268e-07	1.86564e-06	Prekallikrein	KLKB1	P03952
SL000546	-0.317374	0.0627934	0.556022	-0.163946	0.146639	0.335537	0.59586	6.57343e-09	1.14027e-07	PRL	PRL	P01236
SL000550	-0.0697048	0.722632	0.949641	0.148775	0.278666	0.487998	0.0981206	0.311314	0.441679	PCI	SERPINA5	P05154
SL000551	-0.0607061	0.664841	0.936102	-0.164352	0.189386	0.386192	-0.279095	0.0013471	0.00606427	PKC-A	PRKCA	P17252
SL000553	-0.108536	0.45205	0.882267	-0.205273	0.102523	0.273323	-0.307374	0.000261526	0.0015122	PKC-B-II	PRKCB	P05771
SL000554	-0.0533946	0.733858	0.951894	-0.196067	0.15574	0.34342	-0.144255	0.101294	0.187193	PKC-D	PRKCD	Q05655
SL000556	-0.00893582	0.947204	0.98459	-0.158199	0.267549	0.475521	0.238288	0.0298618	0.0706367	PKC-G	PRKCG	P05129
SL000557	0.0671185	0.716511	0.948961	-0.134149	0.333665	0.541269	-0.241612	0.0131572	0.0372121	PKC-Z	PRKCZ	Q05513
SL000558	-0.168882	0.369558	0.833267	-0.236959	0.0572988	0.199855	-0.240918	0.00907881	0.0277266	Prothrombin	F2	P00734
SL000560	-0.0710427	0.670199	0.936843	-0.477737	0.000343327	0.00628497	-0.416844	3.18716e-06	3.12088e-05	P-Selectin	SELP	P16109
SL000563	-0.336564	0.0324166	0.434783	-0.197781	0.123318	0.305595	-0.271382	0.00396457	0.0142091	RANTES	CCL5	P13501
SL000565	-0.086094	0.552264	0.905302	0.379015	0.00660569	0.0530494	0.147804	0.148846	0.25084	Renin	REN	P00797
SL000566	0.0147094	0.921435	0.977323	-0.0682706	0.597218	0.764208	-0.269767	0.0101975	0.0302207	RBP	RBP4	P02753
SL000570	-0.132548	0.467534	0.884965	0.10084	0.518187	0.70307	-0.132077	0.190556	0.306445	Secretin	SCT	P09683
SL000572	-0.206225	0.257376	0.784784	0.0553795	0.690063	0.830197	0.028272	0.782552	0.851967	SAA	SAA1	P0DJI8
SL000573	0.25418	0.109244	0.667258	-0.187851	0.10959	0.28233	0.0557963	0.552224	0.667698	SAP	APCS	P02743
SL000581	0.141218	0.400389	0.853945	-0.115088	0.375804	0.574525	0.0622808	0.531004	0.64685	SOD	SOD1	P00441
SL000582	0.29924	0.216314	0.784784	0.0504676	0.620952	0.777729	-0.027538	0.789066	0.854449	Survivin	BIRC5	O15392
SL000584	0.0103282	0.943555	0.982839	-0.289916	0.0319051	0.142153	-0.154549	0.11478	0.207401	TGF-b1	TGFB1	P01137
SL000586	0.0670026	0.717182	0.948961	-0.109718	0.423131	0.621325	-0.175057	0.0647133	0.131345	Thrombin	F2	P00734
SL000587	0.0028129	0.989024	0.996735	-0.407783	0.00281328	0.0299201	-0.324357	0.000467342	0.00245166	Thyroglobulin	TG	P01266
SL000588	-0.251166	0.156984	0.747588	0.0773423	0.609894	0.771223	0.128698	0.261346	0.391266	TMA	TPO	P07202
SL000589	-0.11366	0.487033	0.884965	-0.251238	0.0600659	0.206735	0.102815	0.290771	0.422203	TSH	CGA TSHB	P01215 P01222
SL000590	-0.195264	0.234488	0.784784	0.0357271	0.753973	0.871927	-0.0402228	0.680157	0.772825	Thyroxine-Binding Globulin	SERPINA7	P05543
SL000591	0.0420036	0.771709	0.956992	0.330197	0.00386011	0.0366569	0.475339	2.59022e-06	2.63272e-05	TIMP-1	TIMP1	P01033
SL000592	-0.432208	0.0160915	0.373841	0.179408	0.209522	0.409292	0.345057	0.000844337	0.00414522	TIMP-2	TIMP2	P16035
SL000597	0.0440275	0.680841	0.939315	0.0893318	0.517439	0.70307	-0.223916	0.0464687	0.0996551	TNF-b	LTA	P01374
SL000598	0.0282232	0.832002	0.961309	-0.206191	0.129593	0.315142	-0.157841	0.108741	0.197586	Tpo	THPO	P40225
SL000601	-0.376583	0.0432264	0.493709	-0.156882	0.207388	0.406343	0.0480887	0.623662	0.729007	Transferrin	TF	P02787
SL000603	0.180601	0.227332	0.784784	-0.199975	0.128371	0.313613	-0.0878305	0.415384	0.548087	Trypsin	PRSS1	P07477
SL000605	-0.181696	0.255974	0.784784	-0.19425	0.149482	0.336612	-0.191093	0.0264296	0.0641509	Ubiquitin+1	RPS27A	P62979
SL000613	0.11507	0.534126	0.905302	0.379371	0.0032269	0.0325442	0.223684	0.0168057	0.0448038	uPA	PLAU	P00749
SL000615	0.0710978	0.634328	0.93461	-0.197808	0.110424	0.283916	-0.24305	0.0108463	0.0317102	Vasoactive Intestinal Peptide	VIP	P01282
SL000616	-0.020458	0.89733	0.976193	-0.351646	0.00617208	0.0505024	-0.144404	0.116107	0.208351	Vitronectin	VTN	P04004
SL000617	-0.0160486	0.932369	0.980156	-0.24138	0.0709439	0.226313	-0.308969	0.000236736	0.00141932	ALT	GPT	P24298
SL000622	-0.218816	0.219474	0.784784	-0.149547	0.241924	0.447714	-0.168111	0.0505863	0.107013	Coagulation Factor V	F5	P12259
SL000633	-0.214917	0.33811	0.829785	0.18511	0.195231	0.393183	0.0319399	0.753794	0.828983	Fas ligand, soluble	FASLG	P48023
SL000638	-0.135044	0.353446	0.829785	0.13472	0.279708	0.487998	-0.00740472	0.947813	0.967141	Cadherin-2	CDH2	P19022
SL000640	-0.0820428	0.694911	0.945689	-0.187508	0.182972	0.378452	0.0718456	0.468668	0.596813	Nidogen	NID1	P14543
SL000645	-0.166036	0.345091	0.829785	-0.0230795	0.869589	0.936208	0.288252	0.00275866	0.0107778	MMP-10	MMP10	P09238
SL000655	0.00437416	0.966176	0.990539	-0.081666	0.553746	0.732487	-0.143801	0.206855	0.325415	Keratin 18	KRT18	P05783
SL000658	0.123239	0.260889	0.784784	0.330832	0.0205515	0.10809	0.580007	3.99406e-08	5.64813e-07	GAS1	GAS1	P54826
SL000668	-0.0303695	0.863111	0.970103	-0.135001	0.264828	0.471329	-0.446467	1.85315e-06	1.94431e-05	CD36 ANTIGEN	CD36	P16671
SL000670	-0.0612414	0.77494	0.956992	0.136478	0.317407	0.52589	0.0634966	0.507338	0.627421	GSTA3	GSTA3	Q16772
SL000674	-0.0285409	0.845405	0.96672	-0.240969	0.099382	0.270826	-0.132178	0.135708	0.234277	FST	FST	P19883
SL000678	0.211199	0.276601	0.808671	0.150366	0.257434	0.466464	0.181327	0.0650138	0.131749	Granulysin	GNLY	P22749
SL000695	0.0786542	0.554379	0.905314	0.143802	0.258713	0.467887	0.517042	1.01423e-07	1.30645e-06	Lipocalin 2	LCN2	P80188
SL000836	-0.025186	0.861974	0.970103	-0.064903	0.627498	0.781219	-0.0564161	0.572113	0.684117	Hemoglobin	HBA1 HBB	P69905, P68871
SL001691	-0.0417008	0.80312	0.958029	-0.156603	0.230203	0.431549	-0.00424671	0.960979	0.975222	FGF7	FGF7	P21781
SL001713	0.0318597	0.81544	0.958446	-0.004804	0.97464	0.987544	-0.0494581	0.626164	0.729964	IL-17	IL17A	Q16552
SL001716	-0.0194374	0.87817	0.971599	-0.00957164	0.945668	0.974321	-0.00250477	0.981732	0.986594	IL-12	IL12A IL12B	P29459, P29460
SL001717	0.213062	0.334971	0.829785	-0.0804989	0.590687	0.758271	-0.20111	0.0533283	0.111723	IL-10	IL10	P22301
SL001718	-0.117519	0.525792	0.905302	0.0109349	0.944509	0.974321	-0.116971	0.296468	0.429516	IL-13	IL13	P35225
SL001720	0.209658	0.22004	0.784784	0.324416	0.0101743	0.0697669	0.436515	4.15269e-06	3.91679e-05	VCAM-1	VCAM1	P19320
SL001721	0.107494	0.54232	0.905302	-0.0779706	0.558819	0.734651	-0.140795	0.152296	0.255661	PECAM-1	PECAM1	P16284
SL001726	0.0994712	0.373516	0.836392	0.00693051	0.955306	0.978849	0.24935	0.0217625	0.0552987	GM-CSF	CSF2	P04141
SL001728	-0.0251661	0.885503	0.973319	0.186613	0.137746	0.324652	0.308853	0.0019906	0.00834256	PDGFRA	PDGFRA	P16234
SL001729	-0.37819	0.179553	0.779081	-0.0344888	0.747087	0.865862	0.28724	0.00265933	0.0104842	G-CSF	CSF3	P09919
SL001731	-0.0607893	0.661155	0.935977	-0.129073	0.286142	0.495041	-0.246017	0.00453327	0.0158905	NSE	ENO2	P09104
SL001737	-0.245329	0.0871889	0.617002	-0.194229	0.131951	0.317316	-0.0552808	0.554387	0.668944	STRATIFIN	SFN	P31947
SL001753	0.333414	0.116979	0.677601	-0.117532	0.404274	0.600412	0.0557227	0.510116	0.630257	Sialoadhesin	SIGLEC1	Q9BZZ2
SL001761	0.145783	0.28198	0.811558	0.173995	0.0921774	0.26127	0.208954	0.0681553	0.135772	Troponin I	TNNI3	P19429
SL001766	0.51377	0.000946137	0.0769327	0.137167	0.137102	0.324652	-0.00711032	0.920767	0.94772	HCG	CGA CGB	P01215,P01233
SL001774	0.572844	0.000306447	0.0442985	0.163963	0.117298	0.296115	0.219941	0.00789703	0.0248165	FABP	FABP3	P05413
SL001777	0.00806848	0.940989	0.980951	0.560377	1.37824e-09	4.68042e-07	0.873714	2.78995e-22	5.18533e-20	Cystatin C	CST3	P01034
SL001791	-0.628503	0.0248926	0.415161	-0.0391147	0.759609	0.876887	-0.158935	0.0659413	0.13254	Osteocalcin	BGLAP	P02818
SL001795	-0.0249255	0.903333	0.977165	-0.0467455	0.703004	0.837553	0.103453	0.299309	0.432187	IL-1b	IL1B	P01584
SL001796	-0.0772821	0.651489	0.935393	-0.0525083	0.683367	0.825498	0.223454	0.0278537	0.0668591	Myeloperoxidase	MPO	P05164
SL001797	-0.0206883	0.919712	0.977323	0.360234	0.00539131	0.0453112	0.188367	0.0497531	0.105671	Kallikrein 6	KLK6	Q92876
SL001800	0.0643706	0.603821	0.925025	0.529656	1.14105e-06	7.81317e-05	0.858249	7.88983e-21	1.14052e-18	TNF sR-II	TNFRSF1B	P20333
SL001802	-0.0304332	0.807591	0.958029	0.393253	0.0182903	0.0986818	0.187146	0.0435075	0.0949719	IFN-g	IFNG	P01579
SL001815	-0.0810465	0.637208	0.934778	-0.205133	0.102292	0.273323	-0.248819	0.00582121	0.0194189	Mn SOD	SOD2	P04179
SL001880	0.0116449	0.939288	0.980951	0.133157	0.253335	0.460963	-0.0865886	0.435009	0.56708	IFN-b	IFNB1	P01574
SL001888	0.137957	0.41983	0.866982	0.176524	0.135329	0.32243	0.623399	2.54314e-11	8.06983e-10	SLPI	SLPI	P03973
SL001890	0.0547558	0.632445	0.934576	-0.347326	0.0376584	0.155554	-0.16384	0.0464955	0.0996551	GA733-1 protein	TACSTD2	P09758
SL001896	-0.352973	0.0554391	0.548176	-0.0753965	0.60375	0.768571	-0.0263437	0.792546	0.856397	Clusterin	CLU	P10909
SL001897	0.0101979	0.950114	0.985725	-0.124136	0.352044	0.557868	-0.106256	0.237957	0.362084	SPINT2	SPINT2	O43291
SL001902	0.0446411	0.799715	0.958029	0.228023	0.0666415	0.222881	0.320082	0.000986135	0.00466532	BCAM	BCAM	P50895
SL001905	0.0216332	0.897116	0.976193	-0.215216	0.163081	0.351272	-0.220668	0.0113782	0.0329591	Mesothelin	MSLN	Q13421
SL001938	0.682956	3.02867e-05	0.00985076	0.154961	0.211236	0.410182	0.154257	0.0770907	0.150367	Activin A	INHBA	P08476
SL001943	-0.0458626	0.813928	0.958446	0.0105943	0.939706	0.971055	-0.0603708	0.54403	0.660245	IL-6 sRa	IL6R	P08887
SL001945	0.170812	0.361968	0.830949	-0.0532164	0.685094	0.826253	-0.535601	7.52027e-08	1.00865e-06	sE-Selectin	SELE	P16581
SL001947	-0.156402	0.422738	0.867515	0.147064	0.279821	0.487998	0.24564	0.00786261	0.0247682	MIA	MIA	Q16674
SL001973	-0.391192	0.0141162	0.359927	-0.308786	0.0190687	0.102092	-0.232035	0.0206372	0.0530612	Mammaglobin 2	SCGB2A1	O75556
SL001990	0.46862	0.00287703	0.155392	0.101707	0.42618	0.62369	0.356317	0.000543145	0.00278202	IL-1Ra	IL1RN	P18510
SL001992	0.217313	0.045433	0.507205	0.489422	8.08475e-07	6.22539e-05	0.818306	4.42308e-19	5.2313e-17	TNF sR-I	TNFRSF1A	P19438
SL001995	-0.0834319	0.655934	0.935393	-0.275035	0.0449684	0.174094	-0.143638	0.158857	0.264191	Angiopoietin-1	ANGPT1	Q15389
SL001996	-0.162595	0.562891	0.906826	0.20448	0.0421833	0.16783	0.276234	0.00434799	0.0154556	Angiopoietin-2	ANGPT2	O15123
SL001997	-0.0570784	0.700419	0.94744	0.407609	0.00108536	0.0155171	0.300376	0.00130588	0.00591969	IL-1 sRI	IL1R1	P14778
SL001998	0.503943	0.00766966	0.30237	0.0190474	0.877316	0.93787	-0.251085	0.00564139	0.018965	TFPI	TFPI	P10646
SL001999	0.080251	0.540833	0.905302	-0.560338	0.000138892	0.00296228	-0.266151	0.00237439	0.0096233	MDM2	MDM2	Q00987
SL002036	0.00767296	0.970762	0.993356	0.00609511	0.96489	0.983024	0.035087	0.730295	0.808868	FGFR4	FGFR4	P22455
SL002071	-0.104311	0.479606	0.884965	-0.0785208	0.609762	0.771223	-0.163659	0.0993954	0.183945	Gastrin-releasing peptide	GRP	P07492
SL002075	0.0205319	0.897429	0.976193	-0.00266763	0.984944	0.991392	0.00664881	0.947129	0.967141	IFN-aA	IFNA2	P01563
SL002078	0.0351717	0.820581	0.95865	0.0305432	0.819662	0.912216	-0.0286129	0.805435	0.865012	TGF-b R II	TGFBR2	P37173
SL002081	-0.252175	0.15637	0.747588	0.0300986	0.80712	0.905697	-0.0691731	0.450337	0.579514	Cadherin-5	CDH5	P33151
SL002086	-0.330966	0.108797	0.667258	0.0121511	0.929532	0.968231	-0.247219	0.0123244	0.0353174	Ficolin-3	FCN3	O75636
SL002093	0.201159	0.368419	0.833267	0.0444953	0.74659	0.865862	0.166671	0.0856596	0.163646	Histone H2A.z	H2AFZ	P0C0S5
SL002505	0.427815	0.0128681	0.354764	-0.0788573	0.572155	0.746739	0.0792918	0.47931	0.603567	ANP	NPPA	P01160
SL002506	0.0958292	0.506823	0.893853	0.618309	2.68211e-08	3.87713e-06	0.643382	6.70325e-13	2.90698e-11	suPAR	PLAUR	Q03405
SL002508	0.187373	0.192109	0.784784	0.51608	2.59283e-05	0.000755934	0.626773	2.76784e-13	1.33369e-11	IL-18 BPa	IL18BP	O95998
SL002517	0.0867845	0.507731	0.893853	0.0908437	0.455809	0.653204	0.215048	0.0669673	0.133832	TNF-a	TNF	P01375
SL002519	-0.0106938	0.953337	0.986707	-0.232233	0.0616834	0.21063	-0.397445	2.24974e-06	2.30466e-05	ERBB3	ERBB3	P21860
SL002522	-0.260496	0.12005	0.683411	-0.00591523	0.971013	0.986174	-0.153545	0.118971	0.212029	Rb	RB1	P06400
SL002524	0.256052	0.0262363	0.415161	0.0714787	0.54899	0.728812	-0.0367274	0.743517	0.820782	sCD4	CD4	P01730
SL002525	-0.0866158	0.614776	0.926121	-0.0218353	0.87177	0.936208	0.0589101	0.583443	0.696384	C2	C2	P06681
SL002528	-0.023336	0.872493	0.971013	0.452594	0.000356901	0.00628497	0.300705	0.00218378	0.00899082	NPS-PLA2	PLA2G2A	P14555
SL002539	-0.0975354	0.572402	0.91373	0.336751	0.00810643	0.0595846	0.159853	0.0985403	0.182746	OPG	TNFRSF11B	O00300
SL002541	0.0542591	0.685272	0.943427	0.261376	0.0302151	0.138878	0.235384	0.0216727	0.0551783	sRANKL	TNFSF11	O14788
SL002542	0.0480217	0.748909	0.953575	0.0455832	0.709986	0.842785	0.0801915	0.447108	0.578793	K-ras	KRAS	P01116
SL002561	-0.0550451	0.657738	0.935393	0.0521311	0.690448	0.830197	0.160317	0.167237	0.274717	PTHrP	PTHLH	P12272
SL002565	-0.40757	0.0130486	0.354764	0.0876739	0.535156	0.717022	-0.0787788	0.450087	0.579514	c-Myc	MYC	P01106
SL002602	0.294462	0.0769588	0.58593	0.383264	0.00326016	0.0326266	0.299122	0.00153087	0.00666109	Trefoil factor 2	TFF2	Q03403
SL002621	-0.264667	0.077557	0.58593	0.0979169	0.362003	0.562175	0.202091	0.0220406	0.0558964	Midkine	MDK	P21741
SL002640	0.00182829	0.9921	0.996735	0.026039	0.8422	0.922308	0.013646	0.892733	0.931398	PlGF	PGF	P49763
SL002644	-0.125017	0.354214	0.829785	-0.368491	0.000342058	0.00628497	-0.554869	6.45758e-11	1.86696e-09	ERBB1	EGFR	P00533
SL002646	0.0412217	0.801372	0.958029	0.040037	0.7794	0.890665	-0.0239954	0.816626	0.873709	MMP-14	MMP14	P50281
SL002650	-0.0929801	0.496503	0.884965	-0.269942	0.0266143	0.127768	-0.311461	0.000125795	0.000847973	M2-PK	PKM2	P14618
SL002654	0.130316	0.297569	0.819509	0.607781	1.60779e-07	1.90158e-05	0.725095	3.21439e-16	2.20101e-14	Epithelial cell kinase	EPHA2	P29317
SL002655	-0.100195	0.574505	0.91373	-0.0895253	0.492306	0.680998	-0.113954	0.229619	0.354371	CTGF	CTGF	P29279
SL002662	-0.0880812	0.632834	0.934576	-0.34999	0.00312711	0.0322886	-0.551323	6.818e-09	1.16713e-07	Coagulation Factor XI	F11	P03951
SL002684	0.267254	0.134712	0.695477	0.487775	2.61468e-05	0.000755934	0.573577	5.68936e-09	1.00025e-07	CSF-1	CSF1	P09603
SL002688	-0.0526624	0.760907	0.955541	0.277155	0.0237883	0.120314	0.665668	3.63981e-12	1.31539e-10	Osteopontin	SPP1	P10451
SL002695	-0.00414492	0.985974	0.996081	-0.420665	0.0016142	0.019812	-0.218794	0.0102852	0.0303425	Glutamate carboxypeptidase	CNDP2	Q96KP4
SL002702	-0.120755	0.287063	0.811558	-0.0885567	0.556867	0.733284	-0.0532219	0.624996	0.72991	PIM1	PIM1	P11309
SL002704	0.142056	0.122621	0.683411	0.553476	5.05193e-15	6.57256e-12	0.857207	2.57752e-24	6.7067e-22	PTN	PTN	P21246
SL002705	-0.123936	0.525693	0.905302	-0.293272	0.0309178	0.139414	-0.161238	0.114168	0.206583	Thrombospondin-1	THBS1	P07996
SL002706	0.00543836	0.973346	0.993356	0.0172354	0.902075	0.95092	0.103524	0.32005	0.451611	CD23	FCER2	P06734
SL002722	-0.275194	0.20746	0.784784	0.141273	0.314111	0.523076	-0.0981506	0.325526	0.455851	CD38	CD38	P28907
SL002731	0.525881	0.00278247	0.155392	0.368557	0.001789	0.0213531	0.258257	0.00907376	0.0277266	Fas, soluble	FAS	P25445
SL002755	0.045925	0.779616	0.956992	0.360213	0.0063796	0.0518741	0.558848	1.72149e-09	3.49946e-08	PAPP-A	PAPPA	Q13219
SL002756	0.117981	0.555931	0.905314	0.0130679	0.928123	0.967539	0.079758	0.422523	0.554694	hnRNP K	HNRNPK	P61978
SL002762	-0.00834019	0.963029	0.990539	0.239863	0.075332	0.229231	0.344505	0.00042937	0.00228004	CgA	CHGA	P10645
SL002763	0.0596644	0.741732	0.953575	-0.0736576	0.61662	0.777729	0.324435	0.000349852	0.00192434	Kallikrein 11	KLK11	Q9UBX7
SL002782	-0.0272889	0.85688	0.969613	-0.216464	0.0884257	0.253258	-0.264636	0.00627463	0.0206144	Adrenomedullin	ADM	P35318
SL002783	0.0437925	0.795831	0.956992	-0.145195	0.261165	0.468865	-0.150838	0.131247	0.229506	Cardiotrophin-1	CTF1	Q16619
SL002785	0.179414	0.204808	0.784784	0.671771	5.00542e-09	1.08534e-06	0.650328	8.91487e-15	5.04272e-13	N-terminal pro-BNP	NPPB	P16860
SL002792	-0.0913743	0.540181	0.905302	-0.266143	0.0282941	0.131938	-0.315944	0.00014221	0.000920472	BARK1	ADRBK1	P25098
SL002803	-0.181951	0.211377	0.784784	-0.00698082	0.960225	0.981345	-0.17948	0.0807356	0.155841	PGP9.5	UCHL1	P09936
SL002823	-0.680968	2.45861e-05	0.00985076	-0.32387	0.0123693	0.0788848	-0.163201	0.0842508	0.161429	sL-Selectin	SELL	P14151
SL002922	0.0571109	0.764552	0.956992	0.136024	0.339561	0.545822	0.160646	0.115432	0.208222	sICAM-1	ICAM1	P05362
SL003041	-0.191097	0.299836	0.819509	-0.255196	0.0466115	0.176284	-0.211877	0.0297216	0.0704744	PF-4	PF4	P02776
SL003043	-0.228129	0.212041	0.784784	-0.170598	0.215495	0.414733	-0.237991	0.0165319	0.0443464	TIMP-3	TIMP3	P35625
SL003060	-0.315182	0.0637091	0.556279	0.344622	0.0054094	0.0453112	0.539749	3.44232e-08	5.03198e-07	bFGF-R	FGFR1	P11362
SL003066	0.0676321	0.675734	0.937239	0.0290926	0.803928	0.903985	0.118889	0.234149	0.359153	PEDF	SERPINF1	P36955
SL003080	0.109912	0.594297	0.921681	-0.212239	0.0754117	0.229231	-0.172338	0.0477037	0.101909	MIF	MIF	P14174
SL003104	0.312664	0.0935165	0.621767	-0.484348	0.00130069	0.0174454	-0.0669741	0.411854	0.545088	Eotaxin-2	CCL24	O00175
SL003166	0.107979	0.489023	0.884965	0.00191655	0.987128	0.991392	0.171872	0.0454936	0.0983176	ALCAM	ALCAM	Q13740
SL003167	0.228629	0.228553	0.784784	0.202625	0.0973488	0.267196	0.582157	1.17962e-08	1.87157e-07	BLC	CXCL13	O43927
SL003168	-0.11158	0.621006	0.930794	-0.1816	0.139998	0.326468	0.224776	0.0119021	0.034258	CTACK	CCL27	Q9Y4X3
SL003169	-0.227348	0.118297	0.68099	-0.179873	0.0965295	0.26607	-0.0439585	0.641173	0.742141	ENA-78	CXCL5	P42830
SL003170	-0.186489	0.222915	0.784784	0.0928208	0.51287	0.699417	-0.0656526	0.530785	0.64685	Eotaxin-3	CCL26	Q9Y258
SL003171	0.066144	0.726858	0.951894	-0.256749	0.0641826	0.216325	-0.329985	0.00044938	0.00236698	FGF-4	FGF4	P08620
SL003172	0.116744	0.53815	0.905302	-0.125253	0.352486	0.557888	0.048329	0.626155	0.729964	GCP-2	CXCL6	P80162
SL003173	-0.170732	0.288182	0.811558	-0.102347	0.428487	0.625658	0.165271	0.0926796	0.175002	Gro-a	CXCL1	P09341
[truncated: 976 more rows]

## Sheet: S file 1C
Supplementary file 1C. Age-associated diseases considered for Mendelian randomization
[truncated: 19 more rows]

[truncated: 2 more sheets: S file 1D, S file 1E]
