# Supplementary material for: Plasma proteomic biomarker signature of age predicts health and life span
Source: eLife. 2020 Nov 19;9:e61073. doi: 10.7554/eLife.61073 (PMC7723412; doi:10.7554/eLife.61073)
Supplement: Table 1—source data 1. [file elife-61073-table1-data1.xlsx]

## Sheet: Source_data1_Table1
Participant_number	Age	Sex	Study_site	death	Follow_up_time	Hypertension	Depression	Cognitive_impairment	Diabetes	Lower_extremities_joint_disease	Peripheral_artery_disease	Anemia	Ischemic_heart_disease	Chronic_obstructive_pulmonary_disease	cancer	Stroke	Congestive_heart_failure	Hip_fracture	Chronic kidney disease	Parkinsons_disease
1	50	Female	Greve in Chianti	0	19.4384	0	0	0	0	0	0	0	0	0	0	1	0	0	0	0
2	70	Female	Greve in Chianti	0	19.0603	0	0	0	0	1	0	1	0	0	1	0	0	0	0	0
3	79	Female	Greve in Chianti	1	18.4767	1	0	0	1	0	0	0	0	0	0	0	0	0	0	0
4	46	Male	Greve in Chianti	1	11.2466	0	1	0	0	0	0	0	0	0	0	0	0	0	0	0
5	68	Female	Greve in Chianti	1	12.0986	0	1	0	0	0	0	0	0	0	0	0	0	0	0	0
6	78	Female	Greve in Chianti	1	14.9397	0	0	1	0	1	0	0	0	0	0	0	0	0	0	0
7	83	Female	Greve in Chianti	1	3.2137	1	0	1	0	0	0	0	0	0	0	0	0	0	0	0
8	29	Male	Greve in Chianti	0	18.8712	0	1	0	0	0	0	0	0	0	0	0	0	0	0	0
9	52	Female	Greve in Chianti	1	17.5178	0	0	0	0	0	0	0	0	0	0	0	0	0	0	0
10	81	Female	Greve in Chianti	1	12.9205	0	0	0	0	0	0	0	0	0	0	0	0	0	0	0
11	78	Female	Greve in Chianti	1	4.31781	1	1	1	0	0	0	1	0	0	0	0	0	0	0	0
12	74	Female	Greve in Chianti	1	16.211	1	1	0	0	1	0	0	0	0	0	0	0	0	0	0
13	87	Female	Greve in Chianti	1	4.44658	0	1	0	0	0	1	1	0	0	0	0	0	1	0	0
14	75	Female	Greve in Chianti	0	19.4247	1	1	0	0	1	0	0	0	0	0	0	0	0	0	0
15	68	Male	Greve in Chianti	1	18.0822	1	0	0	0	0	0	0	1	1	0	0	0	0	0	0
16	26	Male	Greve in Chianti	0	18.8658	0	0	0	0	0	0	0	0	0	0	0	0	0	0	0
17	27	Male	Greve in Chianti	0	19.1233	0	0	0	0	0	0	0	0	0	0	0	0	0	0	0
18	66	Female	Greve in Chianti	1	14.674	0	1	0	0	0	0	0	0	0	0	0	0	0	0	0
19	73	Female	Greve in Chianti	0	18.8904	1	0	0	0	0	0	0	1	0	0	0	0	0	0	0
20	75	Female	Greve in Chianti	1	13.7644	1	0	0	0	0	1	0	0	0	0	0	0	0	0	0
21	67	Female	Greve in Chianti	0	19.4438	1	0	0	0	1	0	0	0	0	0	0	0	0	0	0
22	66	Male	Greve in Chianti	1	16.7781	0	0	0	0	0	0	0	0	1	0	0	0	0	0	0
23	67	Female	Greve in Chianti	1	14.0849	1	0	0	1	0	1	0	0	0	0	0	0	0	0	0
24	57	Male	Greve in Chianti	1	10.4082	0	0	0	0	0	0	0	0	0	0	0	0	0	0	0
25	69	Female	Greve in Chianti	0	18.8055	0	0	1	0	0	0	0	0	0	0	0	0	0	0	0
26	83	Female	Greve in Chianti	1	7.5589	0	0	0	0	0	0	0	0	0	0	0	0	0	0	0
27	65	Female	Greve in Chianti	0	19.3315	0	0	1	0	0	0	0	0	0	0	0	0	0	0	0
28	85	Female	Greve in Chianti	1	9.73151	1	0	1	0	0	0	0	0	0	0	0	0	0	0	0
29	71	Female	Greve in Chianti	1	11.0466	1	1	0	0	0	1	0	0	0	0	0	0	1	0	0
30	77	Male	Greve in Chianti	1	7.49863	0	0	0	0	1	1	0	0	1	0	0	0	0	0	0
31	66	Male	Greve in Chianti	1	3.72603	1	0	0	0	0	0	0	0	0	0	0	0	0	0	0
32	83	Female	Greve in Chianti	1	11.6932	0	0	0	0	0	0	0	0	0	0	0	0	0	0	0
33	85	Female	Greve in Chianti	1	8.41918	1	1	1	0	0	0	1	0	0	0	0	0	0	0	0
34	75	Female	Greve in Chianti	1	18.1945	0	1	0	0	0	0	0	0	0	0	0	0	0	0	0
35	61	Female	Greve in Chianti	0	18.9616	0	0	0	0	0	0	0	0	0	0	0	0	0	0	0
36	71	Male	Greve in Chianti	1	17.4575	1	0	0	0	0	0	0	0	0	0	0	0	0	0	0
37	74	Male	Greve in Chianti	1	12.5863	1	0	0	0	0	1	0	0	1	0	1	0	0	0	0
38	66	Female	Greve in Chianti	0	18.9918	1	0	1	1	0	0	0	0	0	0	0	0	0	0	0
39	88	Female	Greve in Chianti	1	7.46301	0	1	1	0	0	0	0	0	0	0	1	0	0	0	0
40	36	Male	Greve in Chianti	0	19.3753	0	0	0	0	0	0	0	0	0	0	0	0	0	0	0
41	68	Male	Greve in Chianti	1	18.4219	0	0	0	0	0	0	0	0	0	0	0	0	0	0	0
42	63	Female	Greve in Chianti	0	19.2164	1	0	0	0	0	0	0	0	0	0	0	0	0	0	0
43	66	Male	Greve in Chianti	1	11.6575	0	0	0	0	0	1	0	0	0	0	0	0	0	0	0
44	69	Female	Greve in Chianti	0	19.4685	0	0	0	0	0	0	0	0	0	0	0	0	0	0	0
45	41	Male	Greve in Chianti	0	19.337	0	0	0	0	0	0	0	0	0	0	0	0	0	0	0
46	71	Male	Greve in Chianti	1	14.3836	1	0	0	1	0	0	0	0	0	0	0	0	0	0	0
47	86	Male	Greve in Chianti	1	5.35342	1	0	0	0	0	0	0	0	0	0	0	0	0	0	0
48	83	Male	Greve in Chianti	1	9.86027	0	0	0	0	0	0	0	0	0	0	0	0	0	0	0
49	71	Male	Greve in Chianti	0	19.137	0	0	0	0	0	0	0	0	0	0	0	0	0	0	0
50	78	Female	Greve in Chianti	1	14.7123	0	0	0	0	0	0	1	0	0	0	0	0	0	0	0
51	66	Male	Greve in Chianti	0	18.8521	0	0	0	0	0	0	0	0	0	0	0	0	0	0	0
52	37	Male	Greve in Chianti	0	18.8438	0	0	0	0	0	0	0	0	0	0	0	0	0	0	0
53	68	Female	Greve in Chianti	0	19.2192	0	0	0	0	0	0	0	0	0	0	0	0	0	0	0
54	54	Male	Greve in Chianti	0	18.9041	0	0	0	1	0	0	0	0	0	0	0	0	0	0	0
55	68	Male	Greve in Chianti	0	19.2685	0	0	0	0	0	0	0	0	0	0	0	0	0	0	0
56	83	Female	Greve in Chianti	1	5.30685	1	0	1	1	1	0	1	0	0	0	1	0	0	0	0
57	73	Female	Greve in Chianti	1	18.7836	0	0	0	0	0	0	0	0	0	0	0	0	0	0	0
58	25	Male	Greve in Chianti	0	19	0	1	0	0	0	0	0	0	0	0	0	0	0	0	0
59	67	Female	Greve in Chianti	0	18.8959	0	0	0	0	0	0	0	0	1	0	0	0	0	0	0
60	68	Female	Greve in Chianti	0	19.3342	1	0	0	0	0	0	0	0	0	1	0	0	0	0	0
61	49	Male	Greve in Chianti	0	19.3918	0	0	0	0	0	0	0	0	0	0	0	0	0	0	0
62	45	Male	Greve in Chianti	0	19.1425	0	0	0	0	0	0	0	0	0	0	0	0	0	0	0
63	70	Female	Greve in Chianti	0	19.2329	0	0	0	0	1	0	0	0	0	0	0	0	0	0	0
64	88	Male	Greve in Chianti	1	6.96164	0	0	1	0	1	0	0	0	0	0	0	0	0	0	0
65	71	Male	Greve in Chianti	0	19.1233	0	0	0	0	0	0	0	0	0	0	0	0	0	0	0
66	72	Male	Greve in Chianti	0	18.8932	0	0	0	0	0	0	0	0	0	0	0	0	0	0	0
67	74	Male	Greve in Chianti	1	4.2411	0	0	0	0	0	1	0	0	1	0	0	0	0	0	0
68	57	Male	Greve in Chianti	0	18.9315	0	0	0	0	0	0	0	0	1	0	0	0	0	0	0
69	67	Female	Greve in Chianti	0	19.4137	0	0	0	0	0	0	0	0	0	0	0	0	0	0	0
70	76	Male	Greve in Chianti	1	13.0548	0	0	0	0	0	0	0	0	0	0	0	0	0	0	0
71	77	Female	Greve in Chianti	1	13.9342	0	1	0	0	1	0	0	0	1	0	0	0	0	0	0
72	76	Female	Greve in Chianti	1	11.9452	1	0	0	0	0	0	0	0	0	0	0	0	0	0	0
73	67	Female	Greve in Chianti	0	18.874	0	0	0	0	1	0	0	0	0	0	0	0	0	0	0
74	67	Male	Greve in Chianti	1	18.0658	0	0	0	0	0	0	0	0	0	0	0	0	0	0	0
75	90	Female	Greve in Chianti	1	6.48767	1	0	1	0	0	0	1	0	0	0	0	0	0	1	0
76	43	Female	Greve in Chianti	0	19.274	0	0	0	0	0	0	0	0	0	0	0	0	0	0	0
77	75	Male	Greve in Chianti	1	15.8137	1	0	0	0	0	0	0	1	0	0	0	0	0	0	0
78	73	Male	Greve in Chianti	1	14.0822	0	0	0	1	0	0	0	0	0	0	0	0	0	0	0
79	31	Male	Greve in Chianti	0	18.8849	0	0	0	0	0	0	0	0	0	0	0	0	0	0	0
80	67	Male	Greve in Chianti	1	5.29315	0	0	1	0	0	0	0	0	0	0	0	0	0	0	0
81	65	Male	Greve in Chianti	1	17.326	0	0	0	0	0	0	0	0	0	0	0	0	0	0	0
82	86	Female	Greve in Chianti	1	3.49863	0	0	1	0	0	0	0	0	0	0	0	0	0	1	0
83	77	Female	Greve in Chianti	1	11.7671	0	0	1	0	0	0	0	0	0	0	0	0	0	0	0
84	87	Male	Greve in Chianti	1	6.76712	0	0	0	1	0	0	0	0	0	0	0	0	0	0	0
85	66	Female	Greve in Chianti	0	19.0411	1	0	0	0	0	0	0	0	0	0	0	0	0	0	0
86	51	Male	Greve in Chianti	1	9.62192	0	0	0	0	0	0	0	0	0	0	0	0	0	0	0
87	77	Female	Greve in Chianti	1	5.98356	1	0	0	0	1	0	0	0	0	0	0	0	0	0	0
88	74	Female	Greve in Chianti	1	8.15616	1	0	0	0	0	0	0	0	0	0	0	0	0	0	0
89	70	Female	Greve in Chianti	1	18.2493	0	0	0	0	0	0	0	0	0	1	0	0	0	0	0
90	82	Male	Greve in Chianti	1	7.03014	1	1	1	1	1	0	0	0	0	0	0	1	0	0	0
91	44	Female	Greve in Chianti	0	19.411	0	0	0	0	0	0	1	0	0	0	0	0	0	0	0
92	77	Female	Greve in Chianti	1	15.937	0	0	0	0	0	0	0	1	0	0	0	0	0	0	0
93	71	Female	Greve in Chianti	1	8.09041	0	0	1	0	0	0	0	0	0	0	0	0	0	0	0
94	77	Female	Greve in Chianti	1	6.45479	1	1	1	0	1	0	0	1	0	0	1	1	0	0	0
95	83	Male	Greve in Chianti	1	6.04658	0	0	1	0	0	1	0	0	0	0	0	0	0	0	0
96	46	Male	Greve in Chianti	0	18.9507	0	0	0	0	0	0	0	0	0	0	0	0	0	0	0
97	67	Male	Greve in Chianti	0	19.3616	1	0	0	0	0	0	1	0	0	0	0	0	0	0	0
98	74	Female	Greve in Chianti	1	8.61918	0	1	1	0	1	0	0	0	0	0	0	0	0	0	0
99	32	Female	Greve in Chianti	0	18.9534	0	0	0	0	0	0	0	0	0	0	0	0	0	0	0
100	71	Female	Greve in Chianti	0	19.2548	0	0	1	0	0	0	0	0	0	0	0	0	1	0	0
101	38	Male	Greve in Chianti	0	18.9205	0	0	0	0	0	0	0	0	0	0	0	0	0	0	0
102	24	Female	Greve in Chianti	0	18.8712	0	0	0	0	0	0	1	0	0	0	0	0	0	0	0
103	72	Male	Greve in Chianti	1	10.1342	0	0	1	0	0	0	0	0	0	0	0	0	0	0	1
104	83	Female	Greve in Chianti	1	16.0521	1	0	1	0	0	1	0	0	0	0	0	0	0	0	0
105	67	Female	Greve in Chianti	0	18.9288	1	1	0	0	0	0	0	1	0	0	0	0	0	0	0
106	66	Male	Greve in Chianti	1	10.2384	0	0	0	1	0	0	0	0	1	0	0	0	0	0	0
107	68	Male	Greve in Chianti	0	19.0575	1	0	0	0	0	0	0	0	0	0	0	0	0	0	0
108	68	Male	Greve in Chianti	1	4.32877	1	0	0	0	0	0	0	1	0	0	0	0	0	0	0
109	73	Male	Greve in Chianti	1	4.94247	0	0	1	0	0	0	0	0	0	0	1	0	0	0	0
110	30	Female	Greve in Chianti	0	19.3616	0	0	0	0	0	0	0	0	0	0	0	0	0	0	0
111	74	Female	Greve in Chianti	0	19.137	0	0	0	0	0	0	0	0	0	0	0	0	0	0	0
112	66	Male	Greve in Chianti	0	19.389	0	0	0	0	0	0	0	0	0	0	0	0	0	0	0
113	26	Female	Greve in Chianti	0	19.1616	0	1	0	0	0	0	0	0	0	0	0	0	0	0	0
114	23	Female	Greve in Chianti	0	18.9041	0	0	0	0	0	0	0	0	0	0	0	0	0	0	0
115	58	Female	Greve in Chianti	0	18.8959	0	1	0	0	0	0	0	0	0	0	0	0	0	0	0
116	67	Male	Greve in Chianti	1	8.96438	0	0	0	0	0	0	0	0	0	1	0	0	0	0	0
117	54	Female	Greve in Chianti	0	19.2219	0	0	0	0	0	0	1	0	0	0	0	0	0	0	0
118	78	Female	Greve in Chianti	1	5.12329	1	0	0	0	0	0	0	0	0	0	0	1	0	0	0
119	75	Male	Greve in Chianti	1	11.6658	0	0	0	0	0	0	0	0	0	0	0	0	0	0	0
120	68	Male	Greve in Chianti	0	19.4685	0	0	0	0	0	0	0	0	0	1	0	0	0	0	0
121	32	Female	Greve in Chianti	0	18.9644	0	0	0	0	0	0	0	0	0	0	0	0	0	0	0
122	47	Female	Greve in Chianti	0	19.0658	0	0	0	0	0	0	0	0	0	0	0	0	0	0	0
123	51	Female	Greve in Chianti	0	18.9041	0	1	0	0	0	0	0	0	0	0	0	0	0	0	0
124	74	Male	Greve in Chianti	1	17.3699	1	0	0	0	0	0	0	0	0	0	0	0	0	0	0
125	66	Female	Greve in Chianti	0	19.3123	1	0	0	0	0	0	0	0	0	0	0	0	0	0	0
126	68	Female	Greve in Chianti	0	19.3644	1	0	0	1	1	0	0	0	0	0	0	0	0	0	0
127	54	Female	Greve in Chianti	0	19.4274	0	0	0	0	0	0	0	0	0	0	0	0	0	0	0
128	73	Female	Greve in Chianti	1	15.3562	1	1	1	0	0	0	1	0	0	0	1	0	0	0	0
129	77	Female	Greve in Chianti	1	10.1644	0	0	0	0	0	0	0	0	0	0	0	1	0	0	0
130	78	Male	Greve in Chianti	1	15.5288	0	0	0	0	0	0	0	0	0	1	0	0	0	0	0
131	72	Male	Greve in Chianti	0	18.9041	1	0	0	0	1	0	0	0	0	0	0	0	0	0	0
132	31	Female	Greve in Chianti	0	19.4192	0	0	0	0	0	0	0	0	0	0	0	0	0	0	0
133	67	Female	Greve in Chianti	0	18.9534	1	0	0	0	0	0	0	0	0	0	0	0	0	0	0
134	68	Female	Greve in Chianti	0	19.4055	0	0	0	0	0	0	0	0	0	0	0	0	0	0	0
135	57	Female	Greve in Chianti	0	19.2411	0	1	0	0	0	0	0	0	0	0	0	0	0	0	0
136	75	Male	Greve in Chianti	1	4.20274	1	0	0	1	0	0	0	1	0	0	1	0	0	0	0
137	24	Female	Greve in Chianti	0	19.2904	0	0	0	0	0	0	0	0	0	0	0	0	0	0	0
138	26	Male	Greve in Chianti	0	18.8712	0	0	0	0	0	0	0	0	0	0	0	0	0	0	0
139	74	Female	Greve in Chianti	0	19.3315	0	0	0	0	0	0	0	0	0	0	0	0	0	0	0
140	78	Female	Greve in Chianti	1	9.67123	1	0	1	0	0	0	1	0	0	0	0	0	0	0	0
141	65	Female	Greve in Chianti	0	19.011	1	0	0	0	1	0	0	0	1	0	0	0	0	0	0
142	73	Female	Greve in Chianti	0	18.9534	0	0	1	0	1	0	0	0	0	0	0	0	0	0	0
143	68	Female	Greve in Chianti	0	19.1178	0	1	0	0	1	0	0	0	0	0	0	0	0	0	0
144	66	Female	Greve in Chianti	1	14.0164	1	1	1	1	1	0	0	0	0	0	0	0	0	0	0
145	26	Male	Greve in Chianti	0	18.9726	0	0	0	0	0	0	0	0	0	0	0	0	0	0	0
146	33	Female	Greve in Chianti	0	19.4658	0	0	0	0	0	0	0	0	0	0	0	0	0	0	0
147	76	Male	Greve in Chianti	1	11.5808	1	1	0	0	0	0	0	0	0	0	0	0	0	0	0
148	75	Male	Greve in Chianti	1	10.5671	0	0	0	0	0	1	0	0	1	0	0	0	0	0	0
149	73	Female	Greve in Chianti	1	9.24384	1	0	0	0	1	0	0	0	0	0	0	0	0	0	0
150	75	Male	Greve in Chianti	1	6.54521	0	1	0	0	0	0	0	0	0	0	0	0	0	0	0
151	87	Female	Greve in Chianti	1	11.2027	1	0	0	0	0	0	0	0	0	0	0	0	0	0	0
152	75	Female	Greve in Chianti	1	17.663	1	0	0	1	0	0	0	1	0	0	0	0	0	0	0
153	35	Male	Greve in Chianti	0	18.8904	0	0	0	0	0	0	0	0	0	0	0	0	0	0	0
154	75	Male	Greve in Chianti	1	10.9041	0	0	0	1	0	1	0	1	0	0	0	0	0	0	0
155	67	Female	Greve in Chianti	0	18.9041	0	0	0	0	0	0	0	0	0	0	0	0	0	0	0
156	38	Male	Greve in Chianti	0	19.0959	0	0	0	0	0	0	0	0	0	0	0	0	0	0	0
157	83	Female	Greve in Chianti	1	3.14521	0	0	1	1	0	0	1	0	0	0	1	0	0	0	0
158	69	Male	Greve in Chianti	0	19.2411	0	0	0	0	0	0	0	0	0	0	0	0	0	0	0
159	72	Female	Greve in Chianti	1	12.2575	1	0	0	0	0	0	0	0	0	1	0	0	0	0	0
160	82	Female	Greve in Chianti	1	5.44384	0	0	1	0	0	0	0	0	0	0	0	0	0	0	0
161	71	Female	Greve in Chianti	1	16.3808	1	0	1	0	0	0	1	0	0	0	0	0	0	0	0
162	63	Male	Greve in Chianti	1	8.47945	1	0	0	0	0	0	0	1	0	0	0	0	0	0	0
163	79	Female	Greve in Chianti	1	11.1808	1	0	0	1	1	0	0	0	0	1	0	0	0	0	0
164	74	Male	Greve in Chianti	1	11.8438	1	1	1	0	0	0	0	0	0	0	0	0	0	0	0
165	66	Female	Greve in Chianti	1	15.8904	0	0	1	0	0	0	0	0	0	0	0	0	0	0	0
166	67	Female	Greve in Chianti	1	18.9616	0	0	0	0	1	1	0	0	0	0	0	0	0	0	0
167	53	Male	Greve in Chianti	0	19.3918	0	0	0	0	0	0	0	0	0	0	0	0	0	0	0
168	71	Male	Greve in Chianti	0	18.7945	0	0	0	1	0	0	0	0	0	0	0	0	0	0	0
169	67	Female	Greve in Chianti	0	19.4658	1	0	0	0	1	0	0	0	0	0	0	0	0	0	0
170	69	Male	Greve in Chianti	1	7.22466	0	0	1	0	0	0	1	0	0	1	0	0	0	0	0
171	67	Female	Greve in Chianti	0	19.4822	0	0	0	0	0	0	0	0	0	0	0	0	0	0	0
172	70	Female	Greve in Chianti	0	19.2219	0	0	0	0	0	0	0	0	0	0	0	0	0	0	0
173	68	Male	Greve in Chianti	0	19.274	0	0	0	0	0	0	1	0	0	0	0	0	0	0	1
174	27	Female	Greve in Chianti	0	19.2521	0	0	0	0	0	0	0	0	0	0	0	0	0	0	0
175	63	Female	Greve in Chianti	0	18.9616	1	0	0	0	1	1	0	0	0	0	0	0	0	0	0
176	36	Male	Greve in Chianti	0	18.926	0	0	0	0	0	0	0	0	0	0	0	0	0	0	0
177	63	Female	Greve in Chianti	0	19.2767	1	0	0	0	0	0	0	0	0	0	0	0	0	0	0
178	55	Female	Greve in Chianti	0	19.4274	0	0	0	0	0	0	0	0	0	0	0	0	0	0	0
179	84	Female	Greve in Chianti	1	4.8137	0	0	1	0	0	1	0	0	1	0	0	0	0	0	0
180	69	Male	Greve in Chianti	0	19.4411	0	0	0	0	0	0	0	0	0	0	0	0	0	0	0
181	25	Female	Greve in Chianti	0	18.8466	0	0	0	0	0	0	0	0	0	0	0	0	0	0	0
182	69	Female	Greve in Chianti	0	19.3863	1	0	1	0	0	0	0	0	0	0	0	0	0	0	0
183	77	Female	Greve in Chianti	1	12.9205	0	1	0	0	0	0	0	0	0	0	0	0	0	0	0
184	74	Male	Greve in Chianti	1	7.30411	0	1	0	0	0	0	0	0	0	0	0	0	0	0	0
185	77	Female	Greve in Chianti	1	7.44658	0	1	1	0	0	0	0	0	0	0	0	0	0	0	0
186	75	Male	Greve in Chianti	1	17.6849	0	0	0	0	1	0	0	0	0	0	0	0	0	0	0
187	31	Male	Greve in Chianti	0	19.3096	0	0	0	0	0	0	0	0	0	0	0	0	0	0	0
188	67	Male	Greve in Chianti	0	18.9151	0	0	0	0	0	0	0	0	0	0	0	0	0	0	0
189	76	Female	Greve in Chianti	1	6.30137	1	1	0	0	0	0	0	0	0	0	0	0	0	0	0
190	76	Male	Greve in Chianti	1	8.35342	1	0	1	0	0	0	1	0	0	0	1	0	0	0	0
191	71	Female	Greve in Chianti	1	13.0384	0	0	0	0	0	0	0	0	1	0	0	0	0	0	0
192	80	Male	Greve in Chianti	1	8.30411	0	0	0	0	0	0	0	1	0	0	0	0	1	0	0
193	84	Male	Greve in Chianti	1	5.37808	0	0	1	0	0	0	0	0	0	0	0	1	0	0	0
194	77	Male	Greve in Chianti	1	3.40548	0	0	0	0	0	0	0	0	0	0	0	0	0	0	0
195	75	Female	Greve in Chianti	1	10.4849	0	1	0	0	0	0	0	0	0	0	0	0	0	0	0
196	38	Male	Greve in Chianti	0	18.8767	0	0	0	0	0	0	0	0	0	0	0	0	0	0	0
197	66	Female	Greve in Chianti	0	18.9288	1	0	0	0	0	0	0	0	1	0	0	0	0	0	0
198	75	Female	Greve in Chianti	1	6.83836	1	1	1	0	0	0	1	0	0	1	0	0	0	0	0
199	69	Female	Greve in Chianti	0	19.326	0	0	1	0	0	0	0	0	0	0	0	0	0	0	0
200	70	Male	Greve in Chianti	1	9.27397	1	0	0	0	0	0	0	0	1	0	0	0	0	0	0
201	72	Female	Greve in Chianti	1	14.9205	0	0	1	0	0	0	0	0	0	0	0	0	0	0	0
202	67	Female	Greve in Chianti	0	19.0548	0	0	0	1	0	0	0	0	0	0	0	0	0	0	0
203	71	Female	Greve in Chianti	0	19.4411	0	0	0	0	0	0	0	0	0	0	0	0	0	0	0
204	79	Female	Greve in Chianti	1	14.2192	1	1	1	0	0	0	0	0	0	0	0	0	0	0	0
205	65	Female	Greve in Chianti	1	19.2548	0	0	0	0	0	0	0	0	0	0	0	0	0	0	0
206	65	Female	Greve in Chianti	0	19.4658	0	0	0	0	0	0	0	0	0	0	0	0	0	0	0
207	53	Male	Greve in Chianti	0	18.9041	0	0	0	0	0	0	0	0	0	0	0	0	0	0	0
208	68	Male	Greve in Chianti	1	12.0877	0	0	1	0	0	0	0	0	0	0	0	0	0	0	0
209	65	Female	Greve in Chianti	0	18.8932	0	1	0	0	1	0	0	0	0	0	0	0	0	0	0
210	68	Male	Greve in Chianti	1	16.2438	0	0	0	0	0	0	0	0	0	0	0	0	0	0	0
211	31	Male	Greve in Chianti	0	18.8521	0	0	0	0	0	0	0	0	0	0	0	0	0	0	0
212	71	Male	Greve in Chianti	0	18.9808	0	0	0	0	0	0	0	0	1	0	0	0	0	0	0
213	69	Male	Greve in Chianti	0	18.9096	0	1	0	0	0	0	0	0	0	0	0	0	0	0	0
214	35	Male	Greve in Chianti	0	18.9644	0	0	0	0	0	0	0	0	0	0	0	0	0	0	0
215	60	Male	Greve in Chianti	0	19.4767	0	0	0	0	0	0	0	0	0	0	0	0	0	0	0
216	41	Female	Greve in Chianti	0	19.1041	1	0	1	0	0	0	0	0	0	0	0	0	0	0	0
217	71	Male	Greve in Chianti	1	4.84658	0	0	0	0	0	0	0	0	0	0	1	0	0	0	0
218	67	Male	Greve in Chianti	0	19.2877	0	0	0	0	1	0	0	0	0	0	0	0	0	0	0
219	74	Female	Greve in Chianti	0	19	1	0	1	0	0	0	0	0	1	0	1	0	0	0	0
220	75	Male	Greve in Chianti	1	16.7726	1	0	0	1	0	0	0	0	0	0	0	0	0	0	0
221	67	Female	Greve in Chianti	1	18.6027	0	0	1	1	1	0	0	0	0	0	0	0	0	0	0
222	78	Male	Greve in Chianti	1	7.30685	0	0	0	0	0	0	0	0	0	0	0	0	0	0	0
223	75	Female	Greve in Chianti	1	13.1616	0	0	1	0	1	0	0	0	0	0	0	0	0	0	0
224	57	Female	Greve in Chianti	1	7.58082	1	0	0	0	0	0	0	0	0	0	0	0	0	0	0
225	76	Female	Greve in Chianti	1	15.063	0	0	0	0	0	0	0	0	0	0	0	0	1	0	0
226	72	Female	Greve in Chianti	1	9.88493	1	1	0	0	0	0	0	0	0	0	0	0	0	0	0
227	66	Female	Greve in Chianti	0	18.9918	0	0	0	0	0	0	0	0	0	0	0	0	0	0	0
228	75	Male	Greve in Chianti	1	8.77534	0	0	0	0	0	0	0	0	1	0	0	0	0	0	0
229	69	Female	Greve in Chianti	1	4.75068	1	0	0	1	0	0	0	0	0	1	0	1	0	0	0
230	70	Male	Greve in Chianti	1	6.07397	0	0	0	0	0	0	1	0	0	0	1	0	0	0	0
231	74	Female	Greve in Chianti	0	19.1808	0	0	0	0	0	0	0	0	0	0	0	0	1	0	0
232	75	Male	Greve in Chianti	1	4.96986	1	0	1	0	0	0	1	0	0	0	1	0	0	0	0
233	66	Male	Greve in Chianti	1	16.4904	1	0	0	0	0	1	0	0	0	0	0	0	0	0	0
234	80	Male	Greve in Chianti	1	8.26027	1	0	0	0	0	0	0	0	0	0	0	0	0	0	0
235	76	Female	Greve in Chianti	1	9.73973	0	0	0	0	0	0	0	0	0	0	0	0	0	0	0
236	58	Female	Greve in Chianti	0	19.4137	1	0	0	0	0	0	0	0	0	0	0	0	0	0	0
237	77	Female	Greve in Chianti	0	19.1068	0	0	0	0	0	0	0	0	0	0	0	0	0	0	0
238	70	Male	Greve in Chianti	0	19.2192	0	0	0	0	0	0	0	0	1	0	0	0	0	0	0
239	65	Male	Greve in Chianti	1	15.9753	1	0	0	0	0	0	0	0	0	0	0	0	0	0	0
240	83	Male	Greve in Chianti	1	8.67671	0	0	0	0	0	0	0	0	0	0	0	0	0	0	0
241	77	Female	Greve in Chianti	1	11.5041	1	0	0	1	0	0	0	1	0	0	0	0	0	0	0
242	47	Female	Greve in Chianti	0	18.8658	0	1	1	0	0	0	0	0	0	0	0	0	0	0	0
243	52	Female	Greve in Chianti	0	19.1315	0	0	0	0	0	0	1	0	0	0	0	0	0	0	0
244	67	Female	Greve in Chianti	0	18.9479	1	1	0	0	0	0	0	0	0	0	0	0	0	0	0
245	63	Female	Greve in Chianti	0	19.4521	1	0	0	0	0	0	0	0	0	0	0	0	0	0	0
246	42	Female	Greve in Chianti	0	18.7616	1	0	0	0	0	0	1	0	0	0	0	0	0	0	0
247	53	Female	Greve in Chianti	0	18.7014	0	1	0	0	0	0	0	0	1	0	0	0	0	0	0
248	73	Male	Greve in Chianti	1	5.35616	1	0	0	0	0	0	0	0	0	0	1	0	0	0	0
249	67	Female	Greve in Chianti	0	19.2959	1	0	0	0	0	0	0	0	0	0	0	0	0	0	0
250	73	Female	Greve in Chianti	1	12.5918	1	0	0	0	0	0	0	0	0	0	0	0	0	0	0
251	68	Female	Greve in Chianti	1	9.96164	0	0	0	0	0	0	1	0	0	0	0	0	0	0	0
252	66	Female	Greve in Chianti	0	18.7753	1	0	0	0	0	0	0	0	0	0	0	0	0	0	0
253	62	Female	Greve in Chianti	0	19.0877	0	1	0	1	0	0	0	0	0	0	0	0	0	0	0
254	65	Male	Greve in Chianti	1	14.9288	0	0	0	0	1	0	0	0	0	0	0	0	0	0	0
255	74	Male	Greve in Chianti	0	19.1808	1	0	0	0	0	0	0	0	0	0	0	0	0	0	0
256	71	Male	Greve in Chianti	1	16.4795	1	0	0	0	0	0	0	0	0	0	0	0	0	0	0
257	42	Female	Greve in Chianti	0	19.126	0	0	0	0	0	0	0	0	0	0	0	0	0	0	0
258	52	Male	Greve in Chianti	0	18.9726	0	0	0	0	0	0	0	0	0	0	0	0	0	0	0
259	60	Male	Greve in Chianti	1	14.926	0	0	0	0	0	0	0	0	0	0	0	0	0	0	0
260	78	Male	Greve in Chianti	1	13.7753	1	0	0	1	1	0	0	0	0	0	0	0	0	0	0
261	76	Male	Greve in Chianti	1	4.34247	0	0	0	0	0	0	0	0	0	0	0	0	0	0	0
262	75	Female	Greve in Chianti	1	10.1973	1	0	1	0	0	0	0	0	0	0	0	0	0	0	0
263	67	Female	Greve in Chianti	0	19.1315	0	1	0	0	0	0	0	0	0	0	0	0	0	0	0
264	67	Female	Greve in Chianti	1	8.07945	0	0	0	1	0	0	0	0	0	0	0	0	1	0	0
265	52	Male	Greve in Chianti	1	18.3699	0	0	0	0	0	0	0	0	1	0	0	0	0	0	0
266	83	Female	Greve in Chianti	1	8.27123	1	1	1	0	0	0	0	0	0	0	0	0	1	0	0
267	65	Female	Greve in Chianti	0	18.9452	1	0	0	0	0	0	0	0	0	0	0	0	0	0	0
268	36	Female	Greve in Chianti	0	18.9151	0	0	0	0	0	0	0	0	0	0	0	0	0	0	0
269	71	Female	Greve in Chianti	0	19.2493	1	1	1	0	0	0	1	0	0	0	0	0	0	0	0
270	72	Male	Greve in Chianti	1	16.9945	0	0	0	0	0	0	0	0	0	0	0	0	0	0	0
271	78	Male	Greve in Chianti	1	12.5397	1	0	0	0	0	0	0	0	0	0	0	0	0	0	0
272	77	Female	Greve in Chianti	1	17.1836	1	0	1	0	0	0	0	0	0	0	0	0	0	0	0
273	69	Female	Greve in Chianti	0	19.3479	0	1	0	0	0	0	0	0	0	0	0	0	0	0	0
274	76	Female	Greve in Chianti	0	18.8493	1	0	1	0	0	0	0	0	0	0	0	0	0	0	0
275	65	Male	Greve in Chianti	1	12.9699	1	0	0	0	0	0	0	0	0	0	0	0	0	0	0
276	73	Female	Greve in Chianti	1	16.9616	0	0	0	0	0	0	0	0	0	0	0	0	0	0	0
277	71	Male	Greve in Chianti	0	18.8247	1	0	0	0	0	1	0	0	0	0	1	0	0	0	0
278	68	Male	Greve in Chianti	0	19.2959	0	0	0	0	0	0	0	0	0	0	0	0	0	0	0
279	66	Female	Greve in Chianti	0	18.9479	0	1	0	0	0	0	0	0	0	0	0	0	0	0	0
280	66	Female	Greve in Chianti	0	19.2493	0	0	0	0	0	0	0	0	0	1	0	0	0	0	0
281	75	Female	Greve in Chianti	1	19.4356	0	0	0	0	0	0	0	0	0	0	0	0	0	0	0
282	71	Male	Greve in Chianti	1	18.4959	0	0	0	0	0	0	0	0	0	0	0	0	0	0	0
283	30	Female	Greve in Chianti	0	19.3616	0	0	0	0	0	0	0	0	0	0	0	0	0	0	0
284	72	Female	Greve in Chianti	0	19.0411	0	0	0	0	0	0	0	0	0	0	0	0	0	0	0
285	73	Female	Greve in Chianti	1	4.86027	0	0	0	0	0	0	0	0	0	0	0	0	0	0	0
286	86	Male	Greve in Chianti	1	4.74247	0	1	0	0	0	0	1	0	0	0	0	0	0	0	0
287	77	Female	Greve in Chianti	1	13.2904	0	1	0	0	1	0	0	0	0	1	0	0	0	0	0
288	65	Male	Greve in Chianti	0	19.3315	0	0	0	0	0	0	0	0	0	0	0	0	0	0	0
289	82	Male	Greve in Chianti	1	5.89041	1	1	0	0	0	1	0	0	0	0	0	0	0	0	0
290	71	Male	Greve in Chianti	1	14.4055	0	0	0	1	0	0	0	0	0	0	0	0	0	0	0
291	80	Male	Greve in Chianti	1	3.02192	0	0	1	1	0	0	0	1	0	0	0	0	0	0	0
292	64	Male	Greve in Chianti	0	19.4192	0	0	0	0	0	0	0	0	0	0	0	0	0	0	0
293	49	Male	Greve in Chianti	0	19.4137	0	0	0	0	0	0	0	0	0	0	0	0	0	0	0
294	77	Female	Greve in Chianti	1	7.55068	0	1	0	1	0	0	0	0	0	1	0	0	0	0	0
295	72	Female	Greve in Chianti	0	19.2767	0	0	1	1	0	0	0	0	0	0	0	0	0	0	0
296	75	Male	Greve in Chianti	1	16.8521	0	0	0	0	0	0	0	0	0	0	0	0	0	0	0
297	60	Female	Greve in Chianti	1	12.1342	1	0	0	0	0	0	0	0	0	0	0	0	0	0	0
298	71	Male	Greve in Chianti	1	16.3836	1	0	0	0	0	0	0	0	0	0	0	0	0	0	0
299	70	Male	Greve in Chianti	1	12.9014	0	0	1	0	0	0	0	0	0	0	0	0	0	0	0
300	65	Female	Greve in Chianti	0	19.0466	0	1	0	0	0	0	0	0	0	0	0	0	0	0	0
301	72	Female	Greve in Chianti	1	11.2329	1	0	0	0	0	0	0	0	0	0	0	0	0	0	0
302	23	Male	Greve in Chianti	0	18.8712	0	0	0	0	1	0	0	0	0	0	0	0	0	0	0
303	66	Male	Greve in Chianti	0	19.0603	0	0	0	1	0	0	0	0	0	0	0	0	0	0	0
304	71	Male	Greve in Chianti	1	11.4274	0	0	0	1	0	0	1	0	0	0	1	0	0	0	0
305	66	Male	Greve in Chianti	0	19.4493	0	0	0	0	0	0	0	0	0	0	0	0	0	0	0
306	98	Female	Greve in Chianti	1	6.63562	1	1	0	0	0	0	1	0	0	0	0	0	0	0	0
307	57	Male	Greve in Chianti	0	19.2027	1	0	0	0	0	0	0	0	0	0	0	0	0	0	0
308	34	Female	Greve in Chianti	0	19.3096	0	1	0	0	0	0	0	0	0	0	0	0	0	0	0
309	73	Male	Greve in Chianti	0	19.2164	1	0	0	0	0	0	0	0	0	0	0	0	0	0	0
310	54	Male	Greve in Chianti	1	14.2	1	0	0	0	0	0	0	0	0	0	0	0	0	0	0
311	73	Female	Greve in Chianti	0	19.2685	0	0	0	0	0	0	0	0	0	0	0	0	0	0	0
312	72	Male	Greve in Chianti	0	19.3726	0	0	0	0	0	0	0	0	0	0	0	0	0	0	0
313	64	Male	Greve in Chianti	1	18.3342	0	0	0	0	0	0	0	0	0	0	0	0	0	0	0
314	68	Male	Greve in Chianti	1	17.3397	0	0	0	0	0	0	0	0	0	0	0	0	0	0	0
315	25	Male	Greve in Chianti	0	19.1151	0	0	0	0	0	0	0	0	0	0	0	0	0	0	0
316	36	Female	Greve in Chianti	0	19.4658	0	0	0	0	0	0	0	0	0	0	0	0	0	0	0
317	48	Male	Greve in Chianti	0	19.3151	0	1	0	0	0	0	0	0	0	0	0	0	0	0	0
318	37	Female	Greve in Chianti	0	19.137	0	0	0	0	0	0	0	0	0	0	0	0	0	0	0
319	84	Female	Greve in Chianti	1	3.94795	0	0	1	0	1	1	1	0	0	0	0	0	0	0	0
320	24	Female	Greve in Chianti	0	18.8932	0	1	0	0	0	0	0	0	0	0	0	0	0	0	0
321	72	Female	Greve in Chianti	0	19.4521	1	0	0	1	0	0	0	0	0	1	0	0	0	0	0
322	83	Female	Greve in Chianti	1	9.85479	1	1	0	0	0	0	0	0	0	0	0	1	0	0	0
323	69	Male	Greve in Chianti	1	7.43288	1	1	0	0	0	0	0	0	0	0	0	0	0	0	0
324	52	Female	Greve in Chianti	0	19.1151	0	0	0	0	0	0	0	0	0	0	0	0	0	0	0
325	71	Female	Greve in Chianti	0	19.1425	1	0	0	0	1	0	0	0	0	0	0	0	0	0	0
326	70	Male	Greve in Chianti	0	18.9644	1	0	0	0	0	0	0	0	0	0	0	0	0	0	0
327	69	Male	Greve in Chianti	0	19.4411	1	0	0	0	0	0	1	0	0	0	0	0	0	0	0
328	79	Male	Greve in Chianti	1	11.7233	1	0	0	0	0	0	0	0	0	0	0	0	0	0	0
329	69	Male	Greve in Chianti	1	15.1507	0	0	0	0	0	0	0	0	0	0	0	0	0	0	0
330	83	Male	Greve in Chianti	1	9.49589	1	0	0	0	0	0	0	1	0	0	0	0	0	0	0
331	70	Female	Greve in Chianti	0	19.0767	0	0	0	0	0	0	0	0	0	0	0	0	0	0	0
332	77	Male	Greve in Chianti	1	4.01096	0	1	1	0	0	0	0	0	0	1	0	0	0	0	0
333	41	Female	Greve in Chianti	0	19.326	0	0	0	0	0	0	0	0	0	0	0	0	0	0	0
334	71	Male	Greve in Chianti	1	9.18356	1	1	0	0	1	0	0	0	0	0	0	0	0	0	0
335	86	Male	Greve in Chianti	1	11.1452	0	0	1	0	0	0	1	0	0	0	0	0	0	0	1
336	67	Female	Greve in Chianti	0	18.9644	0	0	0	0	0	0	0	0	0	0	0	0	0	0	0
337	68	Female	Greve in Chianti	1	9.98904	1	0	0	0	0	0	0	0	0	0	0	0	0	0	0
338	34	Male	Greve in Chianti	0	18.8712	0	0	0	0	0	0	0	0	0	0	0	0	0	0	0
339	75	Female	Greve in Chianti	1	15.3425	0	0	0	0	0	0	0	0	0	0	0	0	0	0	0
340	74	Male	Greve in Chianti	1	10.5123	0	0	1	0	0	0	0	0	0	0	0	0	0	0	0
341	77	Female	Greve in Chianti	0	18.7781	1	0	0	0	0	0	0	1	0	0	0	0	0	0	0
342	35	Male	Greve in Chianti	0	18.8767	0	0	0	0	0	0	0	0	0	0	0	0	0	0	0
343	68	Male	Greve in Chianti	1	4.40822	1	0	0	1	0	1	0	1	0	0	0	0	0	0	0
344	72	Female	Greve in Chianti	0	19.4685	1	1	0	0	1	0	0	0	0	0	0	0	0	0	0
345	74	Female	Greve in Chianti	1	12.6932	1	1	1	0	1	0	0	0	0	1	0	0	0	0	0
346	75	Male	Greve in Chianti	1	17.2767	0	1	0	0	0	0	0	0	0	0	0	0	0	0	0
347	61	Female	Greve in Chianti	1	18.3151	0	0	0	0	0	0	0	0	0	0	0	0	0	0	0
348	72	Female	Greve in Chianti	0	18.789	0	0	0	0	0	0	0	0	0	0	0	0	0	0	0
349	70	Male	Greve in Chianti	1	8.13973	0	0	0	0	0	0	0	0	1	0	0	0	0	0	0
350	44	Male	Greve in Chianti	0	18.9123	0	1	0	0	0	0	0	0	0	0	0	0	0	0	0
351	29	Male	Greve in Chianti	0	18.8877	0	0	0	0	0	0	0	0	0	0	0	0	0	0	0
352	30	Male	Greve in Chianti	0	18.8767	0	0	0	0	0	0	0	0	0	0	0	0	0	0	0
353	79	Male	Greve in Chianti	1	12.063	0	0	0	1	0	0	0	0	0	0	0	0	0	0	0
354	76	Female	Greve in Chianti	0	19.0603	1	1	0	0	0	0	1	0	0	0	0	0	0	0	0
355	73	Male	Greve in Chianti	0	19.0603	0	0	0	1	0	0	0	0	0	0	0	0	0	0	0
356	68	Female	Greve in Chianti	0	19.4466	0	0	0	0	0	0	0	0	0	0	0	0	0	0	0
357	76	Female	Greve in Chianti	1	18.9616	1	0	0	1	0	0	0	0	0	0	0	0	0	0	0
358	69	Female	Greve in Chianti	1	11.6986	1	0	1	0	0	0	0	0	0	0	0	0	0	0	0
359	70	Male	Greve in Chianti	0	19.274	0	0	0	0	1	0	0	0	0	0	0	0	0	0	0
360	70	Female	Greve in Chianti	0	19.274	1	0	0	0	0	0	0	0	0	1	1	0	0	0	0
361	67	Female	Greve in Chianti	0	19.2904	0	0	1	0	0	0	0	0	0	0	0	0	0	0	0
362	39	Female	Greve in Chianti	0	19.2301	0	0	0	0	0	0	0	0	0	0	0	0	0	0	0
363	26	Female	Greve in Chianti	0	19.1534	0	0	0	0	0	0	0	0	0	0	0	0	0	0	0
364	68	Male	Greve in Chianti	1	14.0849	0	0	0	0	0	0	0	0	0	0	0	0	0	0	0
365	67	Female	Greve in Chianti	0	18.8767	1	1	0	0	0	0	0	0	0	0	0	0	0	0	0
366	88	Female	Greve in Chianti	1	5.40548	0	1	1	0	1	0	0	0	0	0	1	0	1	0	0
367	70	Female	Greve in Chianti	0	18.9479	0	1	1	0	0	0	0	0	0	0	0	0	0	0	0
368	38	Female	Greve in Chianti	0	18.9616	0	0	0	0	0	0	0	0	0	0	0	0	0	0	0
369	70	Female	Greve in Chianti	1	18.1178	0	1	0	0	0	0	0	1	0	0	0	1	0	0	0
370	82	Female	Greve in Chianti	1	6.26301	1	0	0	1	0	0	0	0	0	0	0	1	0	0	0
371	49	Male	Greve in Chianti	0	18.9644	0	0	0	0	0	0	0	0	0	0	0	0	0	0	0
372	76	Female	Greve in Chianti	1	13.8575	1	1	0	0	0	0	0	0	0	0	0	0	0	0	0
373	62	Male	Greve in Chianti	1	15.7507	0	0	0	0	0	0	0	0	0	0	0	0	0	0	0
374	74	Female	Greve in Chianti	0	19.0877	0	0	0	0	0	0	0	0	0	0	0	0	0	0	0
375	69	Male	Greve in Chianti	1	17.7096	1	0	0	0	0	0	0	0	0	0	0	0	0	0	0
376	62	Male	Greve in Chianti	1	6.46575	0	0	0	0	0	0	0	0	0	0	0	0	1	0	0
377	91	Male	Greve in Chianti	1	4.82192	1	0	1	0	0	1	0	1	0	0	0	0	0	0	0
378	23	Female	Greve in Chianti	0	19.0959	0	0	0	0	0	0	0	0	0	0	0	0	0	0	0
379	62	Female	Greve in Chianti	0	19.0822	0	0	0	1	0	0	0	0	0	0	0	0	0	0	0
380	78	Female	Greve in Chianti	1	4.1863	1	1	0	0	0	0	0	0	1	0	0	1	0	0	0
381	73	Male	Greve in Chianti	1	12.6466	1	0	0	1	0	0	0	0	0	0	0	0	0	0	0
382	71	Male	Greve in Chianti	0	19.2164	1	0	0	0	0	1	0	0	0	0	0	0	0	0	0
383	66	Female	Greve in Chianti	0	19.3507	0	0	0	0	0	0	0	0	0	0	0	0	0	0	0
384	76	Male	Greve in Chianti	1	13.411	1	1	0	0	0	0	0	1	0	0	0	0	0	0	0
385	67	Female	Greve in Chianti	0	19.2658	1	0	0	0	0	0	0	0	0	1	0	0	0	0	0
386	84	Female	Greve in Chianti	1	15.9342	1	0	1	0	0	0	0	0	0	0	0	0	0	0	0
387	67	Male	Greve in Chianti	1	8.10685	1	0	0	0	0	0	0	0	0	0	0	0	0	0	0
388	57	Female	Greve in Chianti	0	18.7014	0	0	0	0	0	0	0	0	0	0	0	0	0	0	0
389	68	Female	Greve in Chianti	0	19.0795	1	0	0	0	0	0	0	0	0	0	0	0	0	0	0
390	70	Female	Greve in Chianti	1	11.4986	0	1	0	0	0	0	0	0	0	0	0	0	0	0	0
391	79	Male	Greve in Chianti	1	16.8822	1	0	0	0	0	0	0	0	0	0	0	0	0	0	0
392	71	Female	Greve in Chianti	0	18.7945	0	0	0	0	0	0	0	0	0	0	0	0	0	0	0
393	65	Male	Greve in Chianti	0	18.8274	0	0	0	0	0	0	0	0	0	0	0	0	0	0	0
394	91	Male	Greve in Chianti	1	13.3589	0	0	0	0	0	0	0	0	0	0	0	0	0	0	0
395	23	Female	Greve in Chianti	0	18.9041	0	0	0	0	0	0	0	0	0	0	0	0	0	0	0
396	57	Male	Greve in Chianti	1	14.9479	0	0	0	0	0	0	0	0	0	0	0	0	0	0	0
397	51	Female	Greve in Chianti	0	19.1534	1	0	0	0	0	0	0	0	0	0	0	0	0	0	0
398	80	Female	Greve in Chianti	1	17.9973	1	1	1	0	0	0	0	0	0	0	0	0	0	0	0
399	71	Female	Greve in Chianti	0	19.0603	0	0	0	0	0	0	0	0	0	0	0	0	0	0	0
400	70	Female	Greve in Chianti	1	14.9918	1	0	0	0	0	0	0	0	0	0	0	0	0	0	0
401	84	Female	Greve in Chianti	1	6.13699	1	0	1	1	0	0	0	0	0	0	1	0	1	0	0
402	65	Female	Greve in Chianti	0	19.2521	0	0	1	1	1	0	0	0	0	0	0	0	0	0	0
403	77	Male	Greve in Chianti	1	13.7562	0	0	0	0	0	0	0	0	0	0	0	0	0	0	0
404	33	Male	Greve in Chianti	0	19.3342	0	0	0	0	0	0	0	0	0	0	0	0	0	0	0
405	80	Male	Greve in Chianti	1	6.31781	1	0	1	0	0	1	0	0	0	0	1	1	0	0	0
406	83	Female	Greve in Chianti	1	14.726	0	0	1	0	0	0	0	0	0	0	0	0	0	0	0
407	55	Male	Greve in Chianti	0	19.3644	0	0	0	0	0	0	0	0	0	0	0	0	0	0	0
408	69	Female	Greve in Chianti	0	19.3288	0	0	0	0	0	0	0	0	0	0	0	0	0	0	0
409	72	Male	Greve in Chianti	1	17.6301	1	0	0	1	0	0	0	0	0	0	0	0	1	0	0
410	66	Male	Greve in Chianti	1	15.8329	1	0	0	1	0	0	0	0	0	0	0	0	0	0	0
411	70	Female	Greve in Chianti	0	18.9726	0	0	0	0	0	0	0	0	0	0	1	0	0	0	0
412	76	Female	Greve in Chianti	1	10.3315	1	0	0	0	0	0	0	0	0	0	0	0	0	0	0
413	29	Female	Greve in Chianti	0	19.2904	0	0	0	0	0	0	0	0	0	0	0	0	0	0	0
414	69	Male	Greve in Chianti	1	16.7315	1	0	1	1	0	0	0	0	0	0	0	0	0	0	0
415	43	Female	Greve in Chianti	0	18.9616	0	0	0	0	0	0	0	0	0	0	0	0	0	0	0
416	66	Male	Greve in Chianti	0	19.2192	1	0	0	0	0	0	0	1	0	1	0	1	0	0	0
417	67	Male	Greve in Chianti	1	11.2658	0	0	0	0	0	0	0	0	1	0	0	0	0	0	0
418	40	Male	Greve in Chianti	0	18.8575	0	0	0	0	0	0	0	0	0	0	0	0	0	0	0
419	64	Male	Greve in Chianti	1	17.7534	0	0	0	0	0	0	1	0	0	0	0	0	0	0	0
420	73	Female	Greve in Chianti	0	18.9671	0	0	1	0	0	0	0	0	0	0	0	0	0	0	0
421	79	Male	Greve in Chianti	1	5.58082	0	0	1	0	0	1	0	0	0	0	1	0	0	0	0
422	65	Male	Greve in Chianti	0	18.8658	0	0	0	0	0	0	0	0	0	0	0	0	0	0	0
423	42	Female	Greve in Chianti	0	19.3753	0	0	0	0	0	0	0	0	0	0	0	0	0	0	0
424	71	Female	Greve in Chianti	0	19.2685	0	0	0	0	0	0	0	0	0	0	0	0	0	0	0
425	71	Female	Greve in Chianti	0	19.2767	0	0	0	0	0	0	0	0	0	0	0	0	0	0	0
426	62	Female	Greve in Chianti	0	19.2548	1	0	0	0	0	0	0	0	0	0	0	0	0	0	0
427	81	Female	Greve in Chianti	1	15.7315	0	0	1	0	0	0	0	0	0	0	0	0	0	0	0
428	73	Male	Greve in Chianti	1	19.4	0	0	0	1	0	0	0	0	0	0	1	0	0	0	0
429	41	Female	Greve in Chianti	0	19.2521	0	0	0	0	0	0	0	0	0	0	0	0	0	0	0
430	65	Female	Greve in Chianti	0	19.4493	0	0	0	0	0	0	0	0	1	0	0	0	0	0	0
431	67	Female	Greve in Chianti	0	19.1589	0	0	0	0	1	1	0	0	0	0	1	0	0	0	0
432	68	Male	Greve in Chianti	0	19.3836	0	0	0	0	0	0	0	0	0	0	0	0	0	0	0
433	70	Male	Greve in Chianti	0	19.3041	0	0	0	0	0	0	0	0	0	0	0	0	0	0	0
434	55	Female	Greve in Chianti	0	18.9452	0	0	0	0	0	0	0	0	0	0	0	0	0	0	0
435	73	Female	Greve in Chianti	1	16.2658	1	0	0	0	1	0	0	0	0	0	0	0	0	0	0
436	68	Male	Greve in Chianti	1	7.99178	1	1	0	1	0	1	0	1	0	0	1	1	0	0	0
437	78	Female	Greve in Chianti	0	19.0247	1	0	1	0	0	0	0	0	0	0	0	1	0	0	0
438	77	Female	Greve in Chianti	0	19.0575	1	0	1	0	0	0	0	0	0	0	0	0	0	0	0
439	67	Female	Greve in Chianti	0	19.411	0	1	1	0	1	0	0	0	1	0	0	0	0	0	0
440	65	Female	Greve in Chianti	0	19.1534	0	1	0	0	0	0	0	0	0	0	0	0	0	0	0
441	77	Male	Greve in Chianti	0	19.0685	0	0	1	0	0	0	0	0	0	0	0	0	0	0	0
442	69	Female	Greve in Chianti	1	12.2712	1	0	0	0	0	0	0	0	0	0	0	0	0	0	0
443	50	Female	Greve in Chianti	0	19.126	0	0	0	0	0	0	0	0	0	0	0	0	0	0	0
444	74	Female	Greve in Chianti	1	14.7671	1	1	0	0	1	0	0	0	0	0	0	1	0	0	0
445	68	Female	Greve in Chianti	0	19.3699	0	0	0	0	0	0	0	0	0	0	0	0	0	0	0
446	41	Male	Greve in Chianti	0	19.3425	0	0	0	0	0	0	0	0	0	0	0	0	0	0	0
447	67	Female	Greve in Chianti	0	18.926	0	0	0	0	0	0	0	0	0	0	0	0	0	0	0
448	74	Male	Greve in Chianti	1	7.23836	1	1	0	1	0	1	0	1	1	0	1	1	0	0	0
449	68	Female	Greve in Chianti	1	5.00822	1	1	0	0	0	0	0	0	0	1	0	0	0	0	0
450	85	Male	Greve in Chianti	1	5.91507	1	0	0	0	0	1	0	0	0	0	0	0	0	0	0
451	27	Male	Greve in Chianti	0	18.8658	0	0	0	0	0	0	0	0	0	0	0	0	0	0	0
452	77	Female	Greve in Chianti	1	13.3863	0	1	1	0	1	1	0	0	0	0	0	0	0	0	0
453	73	Male	Greve in Chianti	1	9.78082	0	0	0	1	0	1	0	0	0	0	1	0	0	0	0
454	75	Male	Greve in Chianti	1	7.95342	0	1	0	0	0	0	0	0	1	0	0	0	0	0	0
455	79	Female	Greve in Chianti	1	4.81918	1	0	0	1	0	0	0	0	0	0	0	0	0	0	0
456	77	Male	Greve in Chianti	1	17.8712	0	0	0	0	0	0	0	0	0	0	0	0	0	0	0
457	75	Female	Greve in Chianti	1	8.40548	1	0	0	0	1	0	0	0	0	0	0	0	0	0	0
458	78	Male	Greve in Chianti	1	5.51507	1	0	1	0	0	1	1	0	0	0	0	0	0	0	0
459	76	Female	Greve in Chianti	1	18.7178	1	0	0	0	0	0	0	0	0	0	0	0	0	0	0
460	84	Female	Greve in Chianti	1	6.43562	0	0	0	0	0	1	0	0	0	0	0	0	0	0	0
461	70	Male	Greve in Chianti	1	8.67123	0	0	0	0	0	0	1	0	0	0	0	0	1	0	0
462	76	Male	Greve in Chianti	1	9.4137	0	0	1	0	0	1	0	0	0	0	0	0	0	0	0
463	76	Male	Greve in Chianti	1	4.76986	1	0	1	1	0	1	0	0	0	0	0	0	0	0	0
464	67	Female	Greve in Chianti	0	19.0082	1	0	0	0	0	0	0	0	0	0	0	0	0	0	0
465	66	Male	Greve in Chianti	1	16.4082	1	0	0	0	0	0	0	0	0	0	0	0	0	0	0
466	84	Female	Greve in Chianti	1	7.69863	0	0	1	0	0	0	0	0	0	0	0	0	0	0	0
467	74	Male	Greve in Chianti	1	3.58904	0	0	0	0	0	0	0	0	0	0	0	0	0	0	0
468	60	Female	Greve in Chianti	0	19.2603	1	1	0	0	0	0	0	0	0	0	0	0	0	0	0
469	23	Female	Greve in Chianti	0	19.3288	0	0	0	0	0	0	0	0	0	0	0	0	0	0	0
470	74	Female	Greve in Chianti	1	8.18082	0	0	0	0	0	0	0	0	0	0	0	0	0	0	0
471	49	Male	Greve in Chianti	0	18.7753	0	0	0	0	0	0	0	0	0	0	0	0	0	0	0
472	40	Female	Greve in Chianti	0	19.3562	0	0	0	0	0	0	0	0	0	0	0	0	0	0	0
473	87	Male	Greve in Chianti	1	9.13973	1	1	0	0	0	0	1	0	0	0	0	0	0	0	0
474	46	Male	Greve in Chianti	0	18.9644	0	0	0	0	0	0	0	0	0	0	0	0	0	0	0
475	73	Female	Greve in Chianti	0	18.9096	1	0	1	0	0	0	0	0	0	0	0	0	0	0	0
476	45	Male	Greve in Chianti	0	18.8822	1	0	0	0	0	0	0	0	0	0	0	0	0	0	0
477	71	Male	Greve in Chianti	1	14.5726	1	0	0	0	0	1	0	1	0	0	0	0	0	0	0
478	70	Female	Greve in Chianti	1	11.7205	0	0	0	0	0	0	0	0	0	0	0	0	0	0	0
479	75	Male	Greve in Chianti	1	9.87397	0	0	0	0	0	1	0	0	0	0	0	0	0	0	0
480	21	Female	Greve in Chianti	0	19.4685	0	0	0	0	0	0	0	0	0	0	0	0	0	0	0
481	38	Female	Bagno a Ripoli	0	18.2137	0	1	0	0	0	0	0	0	0	0	0	0	0	0	0
482	48	Female	Bagno a Ripoli	0	18.7123	0	0	0	0	0	0	0	0	0	0	0	0	0	0	0
483	74	Female	Bagno a Ripoli	1	15.7452	1	0	0	0	0	0	0	0	0	0	0	0	0	0	0
484	37	Female	Bagno a Ripoli	0	18.1425	0	0	0	0	0	0	0	0	0	0	0	0	0	0	0
485	71	Male	Bagno a Ripoli	0	18.0712	0	0	1	0	0	0	0	0	0	0	0	0	0	0	0
486	74	Female	Bagno a Ripoli	0	18.6466	0	1	0	0	0	0	1	0	0	0	0	0	0	0	0
487	32	Male	Bagno a Ripoli	0	18.0712	0	0	0	0	0	0	0	0	0	0	0	0	0	0	0
488	68	Male	Bagno a Ripoli	1	13.4959	0	0	0	0	0	1	0	0	0	0	0	0	0	0	0
489	65	Male	Bagno a Ripoli	0	18.6575	1	0	0	0	0	0	0	0	0	0	0	0	0	0	0
490	74	Male	Bagno a Ripoli	1	17.6712	0	0	0	0	0	0	0	0	0	0	0	0	0	0	0
491	79	Female	Bagno a Ripoli	1	9.65479	0	1	0	0	0	0	0	0	0	0	0	0	0	0	0
492	72	Female	Bagno a Ripoli	0	18.4712	0	0	0	0	0	0	0	0	0	0	0	0	0	0	0
493	73	Male	Bagno a Ripoli	1	11.3781	0	0	0	1	0	0	0	0	0	0	0	0	0	0	0
494	79	Female	Bagno a Ripoli	1	5.36712	1	0	0	0	1	0	0	0	0	0	0	0	0	0	0
495	75	Female	Bagno a Ripoli	1	6.56986	1	1	1	0	0	1	0	0	0	0	0	0	0	0	0
496	65	Male	Bagno a Ripoli	1	13.3918	1	0	0	0	0	0	0	0	0	0	0	0	0	0	0
497	79	Female	Bagno a Ripoli	0	18.4904	1	0	0	0	0	0	0	1	0	0	0	0	0	0	0
498	61	Female	Bagno a Ripoli	0	18.5233	0	1	0	0	0	0	0	0	0	0	0	0	0	0	0
499	68	Female	Bagno a Ripoli	0	18.5863	1	0	0	0	0	0	0	0	0	0	0	0	0	0	0
500	77	Female	Bagno a Ripoli	0	18.5644	0	1	0	0	0	0	0	0	0	0	0	0	0	0	0
501	73	Female	Bagno a Ripoli	1	5.59726	0	0	0	1	0	0	0	0	0	0	0	0	0	0	1
502	83	Female	Bagno a Ripoli	1	11.5836	0	1	0	0	0	0	0	0	0	0	0	0	0	0	0
503	66	Male	Bagno a Ripoli	0	18.1562	0	0	0	0	0	0	0	0	1	0	0	0	0	0	0
504	66	Male	Bagno a Ripoli	0	18.4712	0	0	0	0	0	0	0	0	0	0	0	0	0	0	0
505	70	Male	Bagno a Ripoli	0	18.3863	0	0	0	0	0	0	0	0	0	1	0	0	0	0	0
506	67	Female	Bagno a Ripoli	1	13.9534	1	0	0	0	0	0	0	1	0	0	0	0	0	0	0
507	75	Female	Bagno a Ripoli	0	18.5863	1	1	0	0	0	1	0	0	0	0	0	0	0	0	0
508	64	Female	Bagno a Ripoli	0	18.1671	1	0	0	1	0	0	0	0	0	0	0	0	0	0	0
509	67	Male	Bagno a Ripoli	0	18.3342	0	0	1	0	0	0	0	0	1	0	0	0	0	0	0
510	71	Female	Bagno a Ripoli	0	18.3123	1	1	0	0	0	0	0	0	0	0	0	0	0	0	0
511	80	Female	Bagno a Ripoli	1	9.66575	0	1	0	0	0	0	0	0	0	0	0	0	0	0	0
512	36	Female	Bagno a Ripoli	0	18	0	0	0	0	0	0	1	0	0	0	0	0	0	0	0
513	52	Male	Bagno a Ripoli	0	18.1397	1	0	0	0	0	0	0	0	0	0	0	0	0	0	0
514	85	Female	Bagno a Ripoli	1	11.9945	1	1	0	0	0	0	0	0	0	0	0	0	1	0	0
515	89	Female	Bagno a Ripoli	1	7.06849	0	0	0	0	0	0	0	0	0	0	0	0	0	0	0
516	70	Female	Bagno a Ripoli	0	18.4356	0	0	0	0	0	0	0	0	0	0	0	0	0	0	0
517	70	Male	Bagno a Ripoli	0	18.0493	1	0	0	0	0	0	0	0	0	0	0	0	0	0	0
518	85	Female	Bagno a Ripoli	1	10.9014	1	0	0	1	0	1	1	0	0	0	0	0	0	0	0
519	79	Male	Bagno a Ripoli	1	9.39726	1	0	0	0	0	1	0	0	0	0	0	0	0	0	0
520	75	Male	Bagno a Ripoli	1	5.46849	1	0	1	1	0	1	0	1	0	0	0	0	0	0	0
521	62	Female	Bagno a Ripoli	0	18.2329	0	0	1	0	0	0	0	0	0	0	0	0	0	0	0
522	89	Female	Bagno a Ripoli	1	17.3589	1	0	0	0	0	1	1	0	0	0	0	0	0	0	0
523	73	Male	Bagno a Ripoli	1	9.8274	1	1	0	0	0	0	1	0	1	0	0	0	0	0	0
524	62	Male	Bagno a Ripoli	0	18.474	0	0	0	0	0	0	0	0	0	0	0	0	0	0	0
525	76	Female	Bagno a Ripoli	1	17.0575	1	0	1	0	0	0	0	0	0	0	0	0	0	0	0
526	87	Male	Bagno a Ripoli	1	5.69589	0	0	1	0	0	0	0	0	0	0	0	0	0	0	0
527	67	Male	Bagno a Ripoli	0	18.4164	1	0	0	0	0	0	0	0	0	0	0	0	0	0	0
528	67	Female	Bagno a Ripoli	0	18.2822	1	1	0	0	0	0	0	1	0	0	0	0	0	0	0
529	73	Male	Bagno a Ripoli	1	13.6301	0	0	1	0	0	0	0	0	0	0	0	0	0	0	0
530	76	Male	Bagno a Ripoli	1	8.2137	0	0	0	0	0	0	0	0	0	0	0	0	0	0	0
531	73	Female	Bagno a Ripoli	0	18.3205	0	0	1	0	0	0	0	0	0	0	0	0	0	0	0
532	66	Male	Bagno a Ripoli	1	14.4904	1	0	0	0	0	0	0	0	0	0	0	0	0	0	0
533	67	Male	Bagno a Ripoli	0	18.5479	0	0	1	0	0	0	0	0	0	0	0	0	0	0	0
534	69	Female	Bagno a Ripoli	1	17.2411	1	0	0	0	0	0	0	0	0	0	0	0	0	0	0
535	68	Female	Bagno a Ripoli	0	18.4877	0	1	0	0	0	0	0	0	0	0	0	0	0	0	0
536	68	Male	Bagno a Ripoli	1	15.3945	1	0	0	0	0	0	0	0	0	0	0	0	0	0	0
537	53	Male	Bagno a Ripoli	0	18.5068	0	0	0	0	0	0	0	0	0	0	0	0	0	0	0
538	74	Male	Bagno a Ripoli	1	6.76712	0	0	1	0	0	0	0	0	0	0	0	0	0	0	0
539	58	Male	Bagno a Ripoli	0	18.0493	0	0	0	0	0	0	0	0	0	0	0	0	0	0	0
540	69	Female	Bagno a Ripoli	1	15.2877	1	1	0	1	0	0	0	0	0	1	0	0	0	0	0
541	68	Female	Bagno a Ripoli	1	5.73699	0	0	0	0	0	0	0	0	0	0	0	0	0	0	0
542	73	Female	Bagno a Ripoli	1	14.2521	1	1	0	0	0	0	0	0	0	0	0	0	0	0	0
543	66	Male	Bagno a Ripoli	0	18.6986	1	0	0	0	0	0	0	0	0	0	0	0	0	0	0
544	24	Male	Bagno a Ripoli	0	18.0932	0	0	0	0	0	0	0	0	0	0	0	0	0	0	0
545	48	Female	Bagno a Ripoli	0	18.2055	0	0	0	0	0	0	0	0	0	0	0	0	0	0	0
546	75	Female	Bagno a Ripoli	1	5.06301	1	1	0	0	0	0	0	0	0	1	0	0	0	0	0
547	72	Female	Bagno a Ripoli	1	17.5233	0	1	1	0	0	0	0	0	0	0	0	0	0	0	0
548	34	Male	Bagno a Ripoli	0	18.1233	0	0	0	0	0	0	0	0	0	0	0	0	0	0	0
549	74	Male	Bagno a Ripoli	1	15.8137	0	0	0	0	0	0	0	0	0	0	0	0	0	0	0
550	76	Female	Bagno a Ripoli	1	14.1233	1	0	0	0	0	0	0	0	0	0	0	0	0	0	0
551	70	Male	Bagno a Ripoli	0	18.1753	0	1	0	0	1	0	0	0	0	0	0	0	1	0	0
552	76	Female	Bagno a Ripoli	1	12.5973	0	0	0	0	1	1	0	1	0	0	0	0	1	0	0
553	77	Male	Bagno a Ripoli	1	15.674	0	1	0	0	0	0	0	0	0	0	0	0	0	0	0
554	72	Female	Bagno a Ripoli	1	15.6274	1	0	0	0	0	0	0	0	0	0	0	0	0	0	0
555	70	Female	Bagno a Ripoli	0	18.1808	0	0	0	0	1	0	0	0	0	0	0	0	0	0	0
556	65	Male	Bagno a Ripoli	1	11.4548	0	0	1	0	0	0	0	0	0	0	0	0	0	0	0
557	77	Female	Bagno a Ripoli	0	18.6795	1	0	0	0	0	0	0	0	0	1	0	0	0	0	0
558	75	Male	Bagno a Ripoli	1	17.4027	1	0	0	0	0	1	0	1	0	0	0	1	0	0	0
559	68	Male	Bagno a Ripoli	1	17.737	0	0	0	0	0	0	0	0	0	0	0	0	0	0	0
560	62	Male	Bagno a Ripoli	0	18.2438	1	0	0	0	0	0	0	0	0	0	0	0	0	0	0
561	78	Female	Bagno a Ripoli	1	15.6877	1	1	1	0	1	0	0	0	0	1	0	0	0	0	0
562	41	Female	Bagno a Ripoli	0	18.1397	0	0	0	0	0	0	0	0	0	0	0	0	0	0	0
563	68	Male	Bagno a Ripoli	1	18.4219	0	0	0	0	0	0	0	0	0	0	0	0	0	0	0
564	69	Female	Bagno a Ripoli	0	18.2932	1	0	0	0	0	0	0	0	0	0	0	0	0	0	0
565	81	Female	Bagno a Ripoli	1	11.2521	1	1	0	0	1	1	0	0	0	0	0	0	0	0	0
566	71	Male	Bagno a Ripoli	1	4.21096	1	0	1	0	0	0	0	0	1	0	0	1	0	0	0
567	68	Male	Bagno a Ripoli	1	12.1863	0	0	0	0	0	0	0	0	0	0	0	0	0	0	0
568	72	Male	Bagno a Ripoli	1	12.4904	1	0	0	0	0	0	0	0	0	0	0	0	0	0	0
569	41	Female	Bagno a Ripoli	0	18.1863	0	0	0	0	0	0	0	0	0	0	0	0	0	0	0
570	67	Male	Bagno a Ripoli	1	10.1452	0	0	0	0	0	0	0	0	1	0	0	0	0	0	0
571	66	Female	Bagno a Ripoli	1	7.05479	1	0	0	0	0	0	0	0	0	0	0	0	0	0	0
572	45	Male	Bagno a Ripoli	0	18.1151	1	0	0	0	0	0	0	0	0	0	0	0	0	0	0
573	82	Female	Bagno a Ripoli	1	6.08219	1	1	0	0	0	1	0	0	0	0	0	0	0	0	0
574	41	Male	Bagno a Ripoli	0	18.3562	0	1	0	1	0	0	0	0	0	0	0	0	0	0	0
575	85	Female	Bagno a Ripoli	1	15.2	1	0	1	0	0	0	0	0	0	0	0	0	0	0	0
576	74	Male	Bagno a Ripoli	0	18.1397	0	0	0	0	0	0	0	0	0	0	0	0	0	0	0
577	68	Male	Bagno a Ripoli	1	16.0301	0	0	0	0	0	0	0	0	0	0	0	0	0	0	0
578	70	Female	Bagno a Ripoli	0	18.5068	1	0	0	1	0	0	0	0	0	0	0	0	0	0	0
579	66	Female	Bagno a Ripoli	0	18.126	0	0	0	0	1	0	1	0	0	0	0	0	0	0	0
580	68	Female	Bagno a Ripoli	1	9.62466	0	1	0	0	0	0	0	0	0	0	0	0	0	0	0
581	43	Male	Bagno a Ripoli	0	18.2055	0	0	0	0	0	0	0	0	0	0	0	0	0	0	0
582	74	Male	Bagno a Ripoli	0	18.4493	0	0	1	0	0	0	0	0	0	0	0	0	0	0	0
583	77	Female	Bagno a Ripoli	1	12.3479	1	0	0	0	0	0	0	0	0	0	0	0	0	0	0
584	66	Female	Bagno a Ripoli	0	18.5945	1	1	0	0	0	0	0	0	0	0	0	0	0	0	0
585	72	Female	Bagno a Ripoli	1	18.3342	1	0	0	0	1	0	1	0	0	0	0	0	0	0	0
586	66	Male	Bagno a Ripoli	1	14.263	0	0	0	0	0	0	0	0	0	0	0	0	0	0	0
587	82	Male	Bagno a Ripoli	1	5.34795	0	0	1	0	0	0	1	0	1	0	1	0	0	0	0
588	72	Female	Bagno a Ripoli	0	18.5589	1	0	0	0	0	0	0	0	0	0	0	0	0	0	0
589	66	Male	Bagno a Ripoli	0	18.4164	1	0	0	0	0	0	1	0	0	0	0	0	0	0	0
590	51	Female	Bagno a Ripoli	0	18.2384	1	0	0	0	0	0	0	0	0	0	0	0	0	0	0
591	77	Female	Bagno a Ripoli	1	9.04384	0	0	0	1	0	0	0	0	0	0	0	0	1	0	0
592	61	Male	Bagno a Ripoli	0	18.3479	0	0	0	0	0	0	0	1	0	0	0	0	0	0	0
593	23	Male	Bagno a Ripoli	0	18.0712	0	0	0	0	0	0	0	0	0	0	0	0	0	0	0
594	31	Female	Bagno a Ripoli	0	18.2192	0	0	0	0	0	0	0	0	0	0	0	0	0	0	0
595	72	Female	Bagno a Ripoli	0	18.2164	1	0	1	0	0	0	0	0	0	0	0	0	0	0	0
596	85	Female	Bagno a Ripoli	1	8.89041	1	0	0	0	0	0	0	0	0	0	0	0	0	0	0
597	76	Female	Bagno a Ripoli	1	17.2055	0	0	1	0	0	0	0	0	0	0	0	0	0	0	0
598	71	Female	Bagno a Ripoli	1	14.1342	1	0	0	0	0	0	0	0	0	0	0	0	0	0	0
599	26	Female	Bagno a Ripoli	0	18.2822	0	1	0	0	0	0	0	0	0	0	0	0	0	0	0
600	65	Male	Bagno a Ripoli	1	16.7151	0	0	0	0	0	0	0	0	0	0	0	0	0	0	0
601	76	Female	Bagno a Ripoli	1	5.22192	1	0	1	0	1	1	0	0	0	0	0	0	0	0	0
602	71	Male	Bagno a Ripoli	1	8.77808	0	0	0	1	0	0	0	0	0	0	0	0	0	0	0
603	73	Male	Bagno a Ripoli	1	6.24658	1	0	0	1	1	0	0	0	0	0	0	1	0	0	0
604	68	Female	Bagno a Ripoli	0	18.5205	1	1	1	1	0	0	0	0	0	0	0	0	0	0	0
605	32	Male	Bagno a Ripoli	0	18.0521	0	0	0	0	0	0	0	0	0	0	0	0	0	0	0
606	29	Female	Bagno a Ripoli	0	18.1753	0	0	0	0	0	0	0	0	0	0	0	0	0	0	0
607	67	Female	Bagno a Ripoli	0	18.2712	0	0	0	0	0	0	0	0	0	0	0	0	0	0	0
608	31	Female	Bagno a Ripoli	0	18.337	0	0	0	0	0	0	0	0	0	0	0	0	0	0	0
609	91	Female	Bagno a Ripoli	1	3.19726	0	0	0	1	0	0	0	0	0	0	0	0	0	0	0
610	39	Male	Bagno a Ripoli	0	18.1205	0	0	0	0	0	0	0	0	0	1	0	0	0	0	0
611	83	Male	Bagno a Ripoli	1	4.4411	1	1	0	0	1	1	0	1	1	0	0	0	0	0	0
612	79	Male	Bagno a Ripoli	0	18.6164	0	1	0	0	0	0	0	0	0	0	0	0	0	0	0
613	85	Female	Bagno a Ripoli	1	15.8027	0	1	1	0	0	0	1	0	0	0	0	0	0	0	0
614	69	Male	Bagno a Ripoli	0	18.1644	0	0	0	0	0	0	0	1	0	1	0	0	0	0	0
615	76	Female	Bagno a Ripoli	1	17.8877	1	0	0	0	0	0	0	0	0	0	0	0	0	0	0
616	84	Male	Bagno a Ripoli	1	7.04658	1	0	1	0	0	0	0	0	0	0	0	0	0	0	0
617	71	Male	Bagno a Ripoli	1	10.6055	0	0	0	0	0	0	0	0	0	0	0	0	0	0	0
618	73	Female	Bagno a Ripoli	1	14.1233	1	0	0	0	0	0	0	0	0	0	0	0	0	1	0
619	91	Female	Bagno a Ripoli	1	13.9041	0	0	1	0	0	0	0	0	0	0	0	0	0	0	0
620	63	Female	Bagno a Ripoli	0	18.3918	0	0	0	0	0	0	0	0	0	1	0	0	0	0	0
621	76	Male	Bagno a Ripoli	1	6.98904	0	0	0	1	0	0	0	1	0	0	0	0	0	0	0
622	90	Female	Bagno a Ripoli	1	3.67671	0	1	1	0	0	0	1	0	0	0	0	0	0	0	0
623	74	Male	Bagno a Ripoli	0	18.2219	0	0	0	0	0	0	0	0	0	0	0	0	0	0	0
624	71	Male	Bagno a Ripoli	0	18.4356	0	0	0	0	0	0	0	0	0	1	0	0	0	0	0
625	70	Female	Bagno a Ripoli	0	18.2685	1	0	0	0	1	0	0	0	0	0	0	0	0	0	0
626	69	Female	Bagno a Ripoli	0	18.4548	1	0	0	0	0	0	1	0	0	0	0	0	0	0	0
627	84	Female	Bagno a Ripoli	1	8.23836	0	1	0	0	0	0	0	0	0	0	0	0	0	0	0
628	67	Female	Bagno a Ripoli	1	18.1534	1	0	0	1	0	0	0	0	0	0	0	0	0	0	0
629	23	Male	Bagno a Ripoli	0	18.1205	0	0	0	0	0	0	0	0	0	0	0	0	0	0	0
630	72	Male	Bagno a Ripoli	1	17.463	0	0	1	0	0	0	0	0	0	0	0	0	0	0	0
631	69	Female	Bagno a Ripoli	0	18.3096	1	0	0	0	0	0	1	0	0	0	0	0	0	0	0
632	68	Female	Bagno a Ripoli	1	3.14521	1	0	0	0	0	1	0	0	1	0	0	0	0	0	0
633	74	Male	Bagno a Ripoli	0	18.6219	1	0	0	0	0	0	0	0	0	0	0	0	0	0	0
634	70	Male	Bagno a Ripoli	0	18.1452	0	0	0	0	0	0	0	0	0	0	0	0	0	0	0
635	38	Male	Bagno a Ripoli	0	18.0411	0	0	0	0	0	0	0	0	0	0	0	0	0	0	0
636	92	Male	Bagno a Ripoli	1	7.84658	1	0	1	0	0	0	0	0	0	0	0	0	0	0	0
637	60	Male	Bagno a Ripoli	0	18.6822	1	0	0	0	0	0	0	0	0	0	0	0	0	0	0
638	74	Female	Bagno a Ripoli	1	17.3726	0	0	1	1	0	0	0	0	0	1	0	0	0	0	0
639	77	Male	Bagno a Ripoli	1	11.8493	0	0	1	0	1	0	0	0	0	0	0	0	0	0	0
640	72	Male	Bagno a Ripoli	0	18.2932	0	0	0	0	0	0	0	0	0	1	0	0	0	0	0
641	70	Male	Bagno a Ripoli	0	18.0493	1	1	0	0	0	0	0	0	0	0	0	0	0	0	0
642	75	Male	Bagno a Ripoli	1	7.73973	0	0	1	1	0	0	0	0	0	1	1	0	0	0	0
643	74	Female	Bagno a Ripoli	0	18.4904	1	0	0	0	0	0	0	0	0	0	0	0	0	0	0
644	74	Female	Bagno a Ripoli	1	17.5562	1	1	0	0	1	0	1	0	0	0	0	0	0	0	0
645	70	Male	Bagno a Ripoli	1	10.7918	1	0	0	0	0	0	0	0	0	0	0	1	0	0	0
646	32	Male	Bagno a Ripoli	0	18.1753	0	0	0	0	0	0	0	0	0	0	0	0	0	0	0
647	49	Male	Bagno a Ripoli	0	18.137	0	0	0	0	0	0	0	0	0	0	0	0	0	0	0
648	89	Female	Bagno a Ripoli	1	5.05479	1	0	0	1	0	0	0	0	0	0	0	0	0	1	0
649	64	Male	Bagno a Ripoli	1	15.6904	0	0	0	0	0	0	0	0	0	0	0	0	0	0	0
650	30	Female	Bagno a Ripoli	0	18.4082	0	0	0	0	0	0	1	0	0	0	0	0	0	0	0
651	75	Male	Bagno a Ripoli	1	12.7945	0	0	0	0	0	0	0	0	0	0	0	0	0	0	0
652	62	Female	Bagno a Ripoli	1	11.7315	1	0	0	0	0	0	0	0	0	0	0	0	0	0	0
653	66	Female	Bagno a Ripoli	0	18.126	0	0	0	0	0	0	0	0	0	0	0	0	0	0	0
654	68	Male	Bagno a Ripoli	1	14.5205	1	0	0	1	0	0	0	0	0	0	0	1	0	0	0
655	68	Female	Bagno a Ripoli	0	18.537	1	1	0	1	0	0	0	1	0	0	1	0	0	0	0
656	59	Male	Bagno a Ripoli	0	18.0767	0	0	0	0	0	0	0	0	0	0	0	0	0	0	0
657	80	Female	Bagno a Ripoli	1	12.6301	1	0	0	0	1	0	0	0	0	0	0	0	0	0	0
658	66	Male	Bagno a Ripoli	0	18.263	0	0	0	0	0	1	0	0	0	0	0	0	0	0	0
659	70	Female	Bagno a Ripoli	1	5.05205	0	1	0	0	0	0	0	0	0	0	0	0	0	0	0
660	72	Male	Bagno a Ripoli	1	13.137	0	0	0	0	0	0	1	0	0	0	0	0	0	0	0
661	66	Female	Bagno a Ripoli	0	18.3096	0	1	0	0	0	0	0	0	0	0	0	0	0	0	0
662	44	Female	Bagno a Ripoli	0	18.7014	0	0	0	0	0	0	0	0	0	0	0	0	0	0	0
663	66	Male	Bagno a Ripoli	0	18.0466	0	0	0	0	0	0	0	0	0	0	0	0	0	0	0
664	86	Female	Bagno a Ripoli	1	13.1068	1	0	0	0	0	0	0	0	0	1	0	0	0	1	0
665	76	Female	Bagno a Ripoli	1	15.4384	0	1	0	0	0	0	1	0	0	0	0	0	0	0	0
666	68	Male	Bagno a Ripoli	0	18.2767	0	0	0	0	0	0	0	0	0	0	0	0	0	0	0
667	72	Male	Bagno a Ripoli	1	16.6849	1	0	0	0	0	0	0	0	1	0	0	0	0	0	0
668	83	Male	Bagno a Ripoli	1	3.57808	0	0	0	0	0	1	1	0	0	0	0	0	0	0	0
669	86	Female	Bagno a Ripoli	1	9.12603	1	0	1	0	0	1	0	0	0	0	0	0	0	0	0
670	21	Female	Bagno a Ripoli	0	18.0712	0	0	0	0	0	0	0	0	0	0	0	0	0	0	0
671	71	Female	Bagno a Ripoli	0	18.2877	0	0	0	1	0	0	0	0	0	0	0	0	0	0	0
672	69	Female	Bagno a Ripoli	1	14.1781	1	0	0	0	0	0	0	0	0	0	0	0	0	0	0
673	81	Female	Bagno a Ripoli	1	6.36986	0	0	1	0	0	0	0	0	0	0	0	0	0	0	0
674	76	Male	Bagno a Ripoli	1	5.07671	0	0	0	0	0	1	1	0	0	0	0	0	0	0	0
675	78	Male	Bagno a Ripoli	1	11.9616	1	0	0	0	0	0	1	0	0	0	0	0	0	0	0
676	67	Female	Bagno a Ripoli	0	18.1425	0	0	1	0	0	0	0	0	1	0	0	0	0	0	0
677	46	Male	Bagno a Ripoli	0	18.6521	0	0	0	0	0	0	0	0	0	0	0	0	0	0	0
678	67	Male	Bagno a Ripoli	1	6.93699	0	0	0	1	0	0	0	0	0	0	0	0	0	0	0
679	74	Female	Bagno a Ripoli	1	17.4301	0	1	0	0	0	0	0	0	0	0	0	0	0	0	0
680	84	Male	Bagno a Ripoli	1	14.6849	1	0	1	0	0	0	0	0	0	0	0	0	0	0	0
681	27	Male	Bagno a Ripoli	0	18.2712	0	0	0	0	0	0	0	0	0	0	0	0	0	0	0
682	66	Female	Bagno a Ripoli	1	5.89315	0	0	0	0	0	0	0	0	0	1	0	0	0	0	0
683	67	Female	Bagno a Ripoli	0	18.2603	0	0	0	0	0	0	0	0	0	0	0	0	0	0	0
684	72	Male	Bagno a Ripoli	0	18.5233	1	0	0	0	0	0	0	1	0	0	0	0	0	0	0
685	69	Female	Bagno a Ripoli	0	18.6767	0	0	0	1	0	0	0	0	0	0	0	0	0	0	0
686	58	Male	Bagno a Ripoli	0	18.1288	0	0	1	0	0	0	0	0	0	0	0	0	0	0	0
687	71	Female	Bagno a Ripoli	0	18.6082	0	0	0	0	0	0	0	0	0	0	0	0	0	0	0
688	72	Male	Bagno a Ripoli	0	18.1534	0	0	0	1	0	0	0	0	0	0	0	0	0	0	0
689	94	Female	Bagno a Ripoli	1	5.65205	1	0	1	0	0	1	1	0	0	0	0	0	0	0	0
690	72	Female	Bagno a Ripoli	0	18.2384	0	0	0	0	0	0	1	0	0	0	0	0	0	0	0
691	87	Female	Bagno a Ripoli	1	7.30685	1	1	0	0	0	0	0	0	0	0	0	0	0	0	1
692	66	Female	Bagno a Ripoli	1	13.7945	1	0	0	0	0	0	0	0	0	0	0	0	0	0	0
693	88	Female	Bagno a Ripoli	1	5.05753	1	0	0	0	0	0	0	0	0	0	0	0	0	0	0
694	79	Female	Bagno a Ripoli	1	14.9863	0	0	1	0	0	0	0	0	0	0	0	0	0	0	0
695	87	Female	Bagno a Ripoli	1	6.39726	0	0	0	0	0	0	0	0	0	0	0	0	0	0	0
696	85	Male	Bagno a Ripoli	1	5.39178	1	0	0	0	0	0	0	1	0	0	0	0	0	0	0
697	65	Male	Bagno a Ripoli	0	18.1671	0	0	0	0	0	0	0	0	0	0	0	0	0	0	0
698	83	Female	Bagno a Ripoli	1	14.1616	1	0	0	0	0	0	0	0	0	0	0	0	0	0	0
699	68	Male	Bagno a Ripoli	0	18.074	1	0	0	0	0	0	0	0	0	0	0	0	0	0	0
700	66	Female	Bagno a Ripoli	1	15.7973	0	0	0	0	0	0	0	0	0	0	0	0	0	0	0
701	81	Female	Bagno a Ripoli	1	13.7123	1	1	1	0	0	0	0	1	0	1	0	0	0	0	0
702	74	Female	Bagno a Ripoli	1	8.38356	1	0	0	0	0	0	0	0	0	0	0	0	0	0	0
703	67	Male	Bagno a Ripoli	1	16.8466	0	0	0	0	0	0	0	0	0	0	0	0	0	0	0
704	72	Female	Bagno a Ripoli	1	9.20548	1	0	0	0	0	0	0	0	0	0	0	1	0	0	0
705	65	Male	Bagno a Ripoli	1	17.5945	0	0	0	0	0	0	1	0	0	0	0	0	0	0	0
706	70	Female	Bagno a Ripoli	1	18.0822	0	0	1	0	1	0	0	0	0	0	0	0	0	0	0
707	88	Female	Bagno a Ripoli	1	8.10411	1	1	0	0	0	0	0	0	0	0	0	0	0	0	0
708	32	Female	Bagno a Ripoli	0	18.3534	0	0	0	0	0	0	0	0	0	0	0	0	0	0	0
709	73	Female	Bagno a Ripoli	0	18.6082	0	1	0	0	0	0	0	0	0	0	0	0	0	0	0
710	69	Male	Bagno a Ripoli	1	14.5479	0	0	0	0	0	0	0	0	0	1	0	0	0	0	0
711	72	Female	Bagno a Ripoli	1	7.42466	0	1	1	0	1	0	0	0	0	1	0	0	0	0	0
712	66	Male	Bagno a Ripoli	0	18.2192	1	0	0	0	0	0	0	0	0	0	0	0	0	0	0
713	76	Female	Bagno a Ripoli	1	18.2466	0	0	0	0	0	0	0	0	0	0	0	0	0	0	0
714	71	Female	Bagno a Ripoli	1	16.6959	0	0	0	0	0	0	0	0	0	0	0	0	0	0	0
715	68	Female	Bagno a Ripoli	0	18.5233	0	0	1	0	0	0	0	0	0	0	0	0	0	0	0
716	77	Female	Bagno a Ripoli	1	13.4411	1	1	0	0	0	0	0	0	0	0	0	0	0	0	0
717	32	Female	Bagno a Ripoli	0	18.1945	0	0	0	0	0	0	0	0	0	0	0	0	0	0	0
718	69	Female	Bagno a Ripoli	1	11.2904	1	0	0	0	0	1	0	0	0	0	0	0	0	0	0
719	68	Female	Bagno a Ripoli	0	18.6767	1	0	0	0	0	0	0	0	0	0	0	0	0	0	0
720	58	Female	Bagno a Ripoli	0	18.2192	0	0	0	0	0	0	0	0	0	0	0	0	0	0	0
721	35	Female	Bagno a Ripoli	0	18.2795	0	0	0	0	0	0	0	0	0	0	0	0	0	0	0
722	73	Female	Bagno a Ripoli	0	18.1233	0	0	0	0	0	0	0	1	0	0	0	0	0	0	0
723	60	Female	Bagno a Ripoli	0	18.6466	0	0	0	0	0	0	0	0	0	0	0	0	0	0	0
724	77	Male	Bagno a Ripoli	1	12.7397	0	0	0	0	0	0	0	0	0	0	0	0	0	0	0
725	73	Female	Bagno a Ripoli	1	16.926	1	1	0	0	0	0	0	0	0	0	0	0	0	0	0
726	63	Male	Bagno a Ripoli	0	18.0795	1	0	0	0	0	0	0	0	0	0	0	0	0	0	0
727	67	Female	Bagno a Ripoli	1	7.75068	1	0	0	0	0	0	0	0	0	0	0	1	0	0	0
728	74	Male	Bagno a Ripoli	1	5.31233	0	0	0	0	0	0	0	0	1	0	0	0	0	0	0
729	66	Female	Bagno a Ripoli	0	18.2904	0	0	0	0	0	0	0	0	0	0	0	0	0	0	0
730	66	Female	Bagno a Ripoli	0	18.2356	0	0	0	0	0	0	0	0	0	0	0	0	0	0	0
731	67	Male	Bagno a Ripoli	0	18.4356	0	0	0	1	0	0	1	0	0	0	0	0	0	0	0
732	31	Male	Bagno a Ripoli	0	18.0685	0	1	0	0	0	0	0	0	0	0	0	0	0	0	0
733	69	Male	Bagno a Ripoli	0	18.5945	0	1	0	0	0	0	0	0	0	0	0	0	0	0	0
734	29	Female	Bagno a Ripoli	0	18.0795	0	0	0	0	0	0	0	0	0	0	0	0	0	0	0
735	75	Male	Bagno a Ripoli	0	18.4301	0	1	0	0	0	0	0	0	0	0	0	0	0	0	0
736	67	Male	Bagno a Ripoli	0	18.4466	0	0	0	0	0	0	0	0	0	0	0	0	0	0	0
737	36	Female	Bagno a Ripoli	0	18.1836	0	0	0	0	0	0	0	0	0	0	0	0	0	0	0
738	69	Female	Bagno a Ripoli	1	17.3644	1	0	0	0	0	0	0	0	0	0	0	0	0	0	0
739	47	Female	Bagno a Ripoli	0	18.2904	0	0	0	0	0	0	1	0	0	0	0	0	0	0	0
740	73	Female	Bagno a Ripoli	1	3.23562	1	0	0	0	0	0	0	0	0	0	0	0	0	0	0
741	52	Female	Bagno a Ripoli	0	18.3507	0	0	0	0	0	0	0	0	0	0	0	0	0	0	0
742	87	Male	Bagno a Ripoli	1	6.65753	0	0	0	0	0	0	0	0	0	0	0	0	0	0	0
743	80	Female	Bagno a Ripoli	0	18.0849	1	1	0	1	0	0	0	0	0	0	0	0	0	0	0
744	60	Male	Bagno a Ripoli	0	18.1397	0	0	0	0	0	0	0	0	1	0	0	0	0	0	0
745	73	Male	Bagno a Ripoli	0	18.4247	0	0	0	0	0	0	0	0	0	0	0	0	0	0	0
746	71	Male	Bagno a Ripoli	1	12.4849	1	0	1	0	0	1	0	0	0	0	0	0	0	0	0
747	91	Male	Bagno a Ripoli	1	5.6274	0	1	1	0	0	0	0	0	0	0	0	0	0	0	0
748	59	Male	Bagno a Ripoli	0	18.0986	0	0	0	0	0	0	0	0	0	0	0	0	0	0	0
749	77	Male	Bagno a Ripoli	1	13.389	0	0	1	0	0	0	0	0	0	0	0	0	0	0	0
750	68	Male	Bagno a Ripoli	0	18.1644	0	0	0	0	0	0	0	0	0	0	0	0	0	0	0
751	76	Female	Bagno a Ripoli	1	7.0411	0	0	1	0	1	0	0	0	0	0	0	0	0	0	0
752	37	Female	Bagno a Ripoli	0	18.5096	0	0	0	0	0	0	0	0	0	0	0	0	0	0	0
753	90	Female	Bagno a Ripoli	1	6.14521	0	0	0	0	0	0	1	0	0	1	0	0	0	0	0
754	71	Male	Bagno a Ripoli	1	12.2027	1	0	0	0	0	0	0	0	0	0	0	1	0	0	0
755	39	Male	Bagno a Ripoli	0	18.2548	0	0	0	1	0	0	0	0	0	0	0	0	0	0	0
756	67	Male	Bagno a Ripoli	1	11.2301	1	0	0	1	0	0	0	0	0	0	0	0	0	0	0
757	66	Female	Bagno a Ripoli	1	18.0603	0	0	1	0	0	0	0	0	0	0	0	0	0	0	0
758	72	Female	Bagno a Ripoli	0	18.4904	0	0	0	0	0	0	0	0	0	0	0	0	0	0	0
759	69	Male	Bagno a Ripoli	0	18.1644	0	0	0	1	0	0	0	0	0	0	0	0	0	0	0
760	66	Female	Bagno a Ripoli	1	14.3589	0	1	0	0	0	0	0	0	0	1	0	0	0	0	0
761	71	Male	Bagno a Ripoli	0	18.0822	0	1	0	0	0	0	0	0	0	0	0	0	0	0	0
762	75	Female	Bagno a Ripoli	0	18.4274	1	0	0	1	0	1	0	0	0	0	0	0	0	0	0
763	46	Male	Bagno a Ripoli	0	18.2411	0	0	0	0	0	0	0	0	0	0	0	0	0	0	0
764	24	Female	Bagno a Ripoli	0	18.0767	0	1	0	0	0	0	0	0	0	0	0	0	0	0	0
765	84	Female	Bagno a Ripoli	1	8.81644	1	0	0	0	0	0	1	0	0	1	0	0	0	0	0
766	82	Male	Bagno a Ripoli	1	4.04658	0	0	0	0	0	1	1	0	0	0	1	0	0	0	0
767	73	Female	Bagno a Ripoli	1	10.3534	1	0	0	0	0	0	0	0	0	0	0	0	0	0	0
768	83	Male	Bagno a Ripoli	1	10.1397	1	0	0	0	0	0	0	0	0	0	0	0	0	0	0
769	67	Female	Bagno a Ripoli	0	18.6247	1	0	0	0	0	0	0	1	0	0	0	0	0	0	0
770	64	Male	Bagno a Ripoli	0	18.4137	0	0	0	0	0	0	0	0	0	0	0	0	0	0	0
771	64	Female	Bagno a Ripoli	1	18.2301	0	0	0	0	0	0	0	0	0	0	0	0	0	0	0
772	70	Male	Bagno a Ripoli	1	16.2548	0	0	0	0	0	0	1	0	0	0	0	0	0	0	0
773	29	Male	Bagno a Ripoli	0	18.1534	1	0	0	0	0	0	0	0	0	0	0	0	0	0	0
774	76	Female	Bagno a Ripoli	1	13.3151	1	1	0	0	1	0	0	0	0	0	0	0	0	0	0
775	69	Female	Bagno a Ripoli	0	18.4493	0	0	1	0	0	0	0	0	0	0	0	0	0	0	0
776	51	Male	Bagno a Ripoli	0	18.6548	1	0	0	0	0	0	0	0	0	0	0	0	0	0	0
777	84	Female	Bagno a Ripoli	1	5.79452	0	0	1	0	0	0	0	0	0	0	0	0	0	0	0
778	79	Male	Bagno a Ripoli	1	9.65205	0	1	0	0	0	0	0	0	1	0	0	0	0	0	0
779	70	Female	Bagno a Ripoli	0	18.463	0	0	0	0	0	0	0	0	0	0	0	0	0	0	0
780	27	Female	Bagno a Ripoli	0	18.0822	0	1	0	0	0	0	0	0	0	0	0	0	0	0	0
781	37	Female	Bagno a Ripoli	0	18.5973	0	0	0	0	0	0	0	0	0	0	0	0	0	0	0
782	31	Female	Bagno a Ripoli	0	18.3918	0	0	0	0	0	0	0	0	0	0	0	0	0	0	0
783	77	Female	Bagno a Ripoli	1	7.39178	0	0	1	0	0	0	0	0	0	0	0	0	0	0	0
784	50	Female	Bagno a Ripoli	0	18.4274	1	0	0	0	0	0	0	0	0	0	0	0	0	0	0
785	66	Male	Bagno a Ripoli	0	18.4164	0	0	0	0	0	0	0	0	0	0	0	0	0	0	0
786	73	Female	Bagno a Ripoli	0	18.4822	0	0	0	0	1	0	0	0	0	0	0	0	1	0	0
787	80	Female	Bagno a Ripoli	1	11.0027	0	0	1	1	0	0	0	0	0	0	0	0	0	0	0
788	72	Male	Bagno a Ripoli	1	12.526	0	0	0	0	0	0	0	0	0	0	0	0	0	0	0
789	65	Female	Bagno a Ripoli	1	15.4164	0	0	0	0	0	0	0	0	0	0	0	0	0	0	0
790	68	Female	Bagno a Ripoli	0	18.6712	1	0	0	0	0	0	0	0	1	0	0	0	0	0	0
791	70	Male	Bagno a Ripoli	0	18.1205	1	0	0	0	0	0	0	0	0	0	0	0	0	0	0
792	68	Male	Bagno a Ripoli	1	10.8658	1	0	0	0	0	1	0	1	0	0	0	0	0	0	0
793	66	Male	Bagno a Ripoli	0	18.1644	1	0	0	0	0	0	0	0	0	0	0	0	0	0	0
794	71	Female	Bagno a Ripoli	0	18.5068	0	0	0	0	0	0	0	0	0	0	0	0	0	0	0
795	78	Female	Bagno a Ripoli	1	17.7151	1	0	0	0	1	0	0	1	0	0	0	0	0	0	0
796	23	Female	Bagno a Ripoli	0	18.474	0	0	0	0	0	0	0	0	0	0	0	0	0	0	0
797	66	Male	Bagno a Ripoli	0	18.6603	0	0	0	0	0	0	0	0	0	0	0	0	0	0	0
798	59	Female	Bagno a Ripoli	0	18.1836	1	0	0	0	0	0	0	0	0	0	0	0	0	0	0
799	52	Male	Bagno a Ripoli	0	18.3342	0	0	0	0	0	0	0	0	0	0	0	0	0	0	0
800	77	Male	Bagno a Ripoli	1	15.2438	0	0	0	0	0	0	0	0	0	0	0	0	0	0	0
801	49	Female	Bagno a Ripoli	0	18.4247	0	0	0	0	0	0	0	0	0	0	0	0	0	0	0
802	70	Female	Bagno a Ripoli	0	18.6493	1	0	0	0	0	0	0	0	0	0	0	0	0	0	0
803	74	Male	Bagno a Ripoli	1	4.86575	0	0	0	1	0	0	0	0	0	0	0	0	0	0	0
804	71	Female	Bagno a Ripoli	1	16.4767	1	0	0	0	0	0	0	0	0	0	0	0	0	0	0
805	79	Male	Bagno a Ripoli	1	8.6411	0	1	0	0	0	1	1	0	0	0	0	0	0	0	0
806	75	Male	Bagno a Ripoli	0	18.3068	0	0	0	0	0	0	0	0	0	0	0	0	0	0	0
807	90	Female	Bagno a Ripoli	1	6.87397	1	1	1	1	1	0	1	0	0	0	0	0	0	1	0
808	69	Female	Bagno a Ripoli	1	16.9918	1	1	0	0	0	0	0	0	0	0	0	0	0	0	0
809	26	Female	Bagno a Ripoli	0	18.1233	0	0	0	0	0	0	0	0	0	0	0	0	0	0	0
810	33	Male	Bagno a Ripoli	0	18.0795	0	0	0	0	0	0	0	0	0	0	0	0	0	0	0
811	70	Female	Bagno a Ripoli	1	15.5973	0	1	0	0	0	0	0	0	0	0	0	0	0	0	0
812	85	Female	Bagno a Ripoli	1	6.14247	1	1	1	0	0	0	0	0	0	0	0	0	0	0	0
813	69	Male	Bagno a Ripoli	0	18.2164	1	0	0	0	0	0	0	0	0	0	0	0	0	0	0
814	70	Male	Bagno a Ripoli	1	14.9945	1	0	0	0	0	0	0	0	0	0	0	0	0	0	0
815	66	Male	Bagno a Ripoli	0	18.5644	0	0	0	0	0	0	0	0	0	0	0	0	0	0	0
816	60	Female	Bagno a Ripoli	0	18.5233	1	0	0	0	0	0	0	0	0	0	0	0	0	0	0
817	74	Male	Bagno a Ripoli	0	18.1425	0	0	1	0	0	0	0	0	0	0	0	0	0	0	0
818	72	Male	Bagno a Ripoli	1	17.674	0	1	0	1	0	0	0	0	0	0	0	0	0	0	0
819	32	Male	Bagno a Ripoli	0	18.0877	0	0	0	0	0	0	0	0	0	0	0	0	0	0	0
820	62	Female	Bagno a Ripoli	0	18.4712	0	0	0	0	0	0	0	0	0	0	0	0	0	0	0
821	72	Female	Bagno a Ripoli	0	18.4082	0	0	1	0	0	0	0	0	0	0	0	0	0	0	0
822	50	Female	Bagno a Ripoli	0	18.4904	0	0	0	0	0	0	0	0	0	0	0	0	0	0	0
823	73	Male	Bagno a Ripoli	1	12.2384	0	0	0	0	0	1	0	0	0	0	0	0	0	0	0
824	69	Female	Bagno a Ripoli	0	18.6658	1	0	0	0	0	0	0	0	0	0	0	0	0	0	0
825	69	Female	Bagno a Ripoli	0	18.1836	1	1	0	0	0	0	0	0	0	0	0	0	0	0	0
826	92	Male	Bagno a Ripoli	1	6.87945	0	0	1	0	0	0	0	0	1	0	0	0	0	0	0
827	67	Male	Bagno a Ripoli	0	18.2822	1	0	1	0	0	0	0	0	0	0	0	0	0	0	0
828	75	Male	Bagno a Ripoli	1	5.40822	0	1	0	1	0	0	1	1	1	0	1	1	0	0	0
829	46	Female	Bagno a Ripoli	0	18.2767	1	1	0	0	0	0	0	0	0	0	0	0	0	0	0
830	84	Female	Bagno a Ripoli	1	14.9205	1	0	0	1	0	0	0	0	0	0	0	0	0	0	0
831	68	Female	Bagno a Ripoli	0	18.2192	0	0	0	0	0	0	0	0	0	0	0	0	0	0	0
832	77	Female	Bagno a Ripoli	1	14.7479	1	1	0	0	0	0	0	0	0	0	0	0	0	0	0
833	75	Male	Bagno a Ripoli	1	17.0959	0	1	0	0	0	0	0	0	0	0	0	0	0	0	0
834	83	Female	Bagno a Ripoli	1	14.5452	1	0	0	0	0	0	0	0	0	0	0	0	0	0	0
835	79	Male	Bagno a Ripoli	1	14.2466	0	0	1	0	0	0	0	0	0	0	0	0	0	0	0
836	74	Female	Bagno a Ripoli	0	18.3205	1	0	0	0	0	0	0	0	0	0	0	0	0	0	0
837	43	Female	Bagno a Ripoli	0	18.2027	0	0	0	0	0	0	0	0	0	0	0	0	0	0	0
838	69	Male	Bagno a Ripoli	0	18.5863	1	0	0	1	0	0	0	0	0	0	0	0	0	0	0
839	25	Female	Bagno a Ripoli	0	18.5315	0	0	0	0	0	0	0	0	0	0	0	0	0	0	0
840	82	Female	Bagno a Ripoli	1	13.1644	1	0	1	0	0	0	0	0	0	0	0	0	0	0	0
841	75	Female	Bagno a Ripoli	0	18.4521	0	1	0	0	0	0	0	0	0	0	0	0	0	0	0
842	74	Female	Bagno a Ripoli	1	15.0767	1	1	0	0	0	0	0	0	0	0	0	0	0	0	0
843	69	Male	Bagno a Ripoli	0	18.4932	1	0	0	1	0	0	0	0	0	0	0	0	0	0	0
844	69	Female	Bagno a Ripoli	1	16.2192	1	0	0	1	0	0	0	0	0	0	0	0	0	0	0
845	66	Female	Bagno a Ripoli	0	18.0986	1	0	0	0	0	0	0	0	0	0	0	0	0	0	0
846	65	Female	Bagno a Ripoli	1	5.31507	1	0	0	0	0	0	0	0	0	0	0	0	0	0	0
847	70	Female	Bagno a Ripoli	1	17.4055	1	0	1	0	0	0	0	0	0	0	0	0	0	0	0
848	72	Male	Bagno a Ripoli	1	17.7644	1	0	0	0	0	1	0	0	0	0	0	0	0	0	0
849	69	Male	Bagno a Ripoli	1	13.3945	1	0	0	0	0	0	0	0	0	0	0	0	0	0	0
850	81	Female	Bagno a Ripoli	1	15.1671	1	1	0	0	0	0	0	0	0	0	0	0	0	0	0
851	72	Male	Bagno a Ripoli	1	14.9671	1	0	0	1	0	0	0	0	0	0	0	0	0	0	0
852	83	Female	Bagno a Ripoli	1	9.53151	1	0	0	0	1	0	0	0	0	0	0	0	0	0	0
853	72	Female	Bagno a Ripoli	0	18.4301	0	1	0	0	0	0	0	0	0	0	0	0	0	0	0
854	86	Female	Bagno a Ripoli	1	4.18904	1	1	1	1	0	0	0	0	0	0	0	0	0	0	0
855	58	Female	Bagno a Ripoli	0	18.2219	0	0	0	0	0	0	0	0	0	0	0	0	0	0	0
856	84	Female	Bagno a Ripoli	1	5.40822	1	1	1	0	1	0	0	0	0	0	0	0	0	0	0
857	68	Male	Bagno a Ripoli	0	18.2247	1	0	0	0	0	0	0	0	0	0	0	0	0	0	0
858	75	Female	Bagno a Ripoli	0	18.1205	0	0	0	0	0	0	0	0	0	0	0	0	0	0	0
859	63	Female	Bagno a Ripoli	0	18.2137	0	0	0	0	0	0	0	0	0	0	0	0	0	0	0
860	67	Female	Bagno a Ripoli	1	14.2301	1	0	0	0	0	0	0	1	0	1	0	0	0	0	0
861	35	Male	Bagno a Ripoli	0	18.6466	0	0	0	0	0	0	0	0	0	0	0	0	0	0	0
862	62	Male	Bagno a Ripoli	0	18.6438	1	0	0	0	0	0	0	0	0	0	0	0	0	0	0
863	72	Male	Bagno a Ripoli	1	5.6274	0	0	0	0	0	0	0	0	0	0	0	0	0	0	0
864	66	Female	Bagno a Ripoli	0	18.7178	0	0	0	0	0	0	0	0	0	0	0	0	0	0	0
865	77	Female	Bagno a Ripoli	1	17.5726	0	1	1	0	0	0	0	0	0	0	0	0	0	0	0
866	81	Female	Bagno a Ripoli	1	6.56164	1	0	1	1	0	0	0	0	0	0	0	0	0	0	0
867	75	Female	Bagno a Ripoli	1	8.61644	1	0	1	0	0	0	0	0	0	0	0	0	0	0	0
868	54	Female	Bagno a Ripoli	0	18.1973	0	0	0	0	0	0	0	0	0	0	0	0	0	0	0
869	39	Female	Bagno a Ripoli	0	18.1836	0	0	0	0	0	0	0	0	0	0	0	0	0	0	0
870	76	Female	Bagno a Ripoli	0	18.5671	0	1	0	0	0	0	0	0	0	0	0	0	0	0	0
871	78	Female	Bagno a Ripoli	1	16.9863	1	0	0	0	0	1	0	0	0	0	1	0	0	1	0
872	78	Male	Bagno a Ripoli	1	8.85479	0	0	0	0	1	1	0	0	0	0	0	0	0	0	0
873	84	Male	Bagno a Ripoli	1	4.67123	1	0	0	1	0	0	0	1	0	0	0	0	0	0	0
874	51	Female	Bagno a Ripoli	0	18.3205	0	0	0	0	0	0	0	0	0	0	0	0	0	0	0
875	69	Female	Bagno a Ripoli	1	12.589	0	0	1	1	0	0	0	0	0	0	0	1	0	0	0
876	61	Male	Bagno a Ripoli	0	18.2329	0	0	0	0	0	0	0	0	0	0	0	0	0	0	0
877	71	Female	Bagno a Ripoli	1	16.8658	0	0	0	0	0	0	0	0	0	0	0	0	0	0	0
878	74	Male	Bagno a Ripoli	1	14.3973	1	0	0	0	0	1	0	1	0	0	0	0	0	0	0
879	83	Male	Bagno a Ripoli	1	10.4575	0	1	1	0	0	0	0	0	0	0	0	0	0	0	0
880	55	Male	Bagno a Ripoli	0	18.3205	1	0	0	0	0	0	0	0	0	0	0	0	0	0	0
881	71	Male	Bagno a Ripoli	0	18.3205	0	1	0	1	0	0	0	0	0	1	0	0	0	0	0
882	50	Male	Bagno a Ripoli	0	18.1014	0	0	0	0	0	0	0	0	0	0	0	0	0	0	0
883	69	Female	Bagno a Ripoli	0	18.5014	1	0	0	0	0	0	0	0	0	0	0	0	0	0	0
884	70	Female	Bagno a Ripoli	1	17.1534	1	1	0	0	0	0	0	1	0	0	0	0	0	0	0
885	72	Male	Bagno a Ripoli	1	5.12877	0	0	0	0	0	0	0	0	0	0	0	0	0	0	0
886	68	Female	Bagno a Ripoli	0	18.6137	0	1	0	0	0	0	0	0	0	0	0	0	0	0	0
887	55	Female	Bagno a Ripoli	0	18.3753	0	0	0	0	0	0	0	0	0	0	0	0	0	0	0
888	25	Male	Bagno a Ripoli	0	18.4822	0	0	0	0	0	0	0	0	0	0	0	0	0	0	0
889	79	Male	Bagno a Ripoli	1	4.73425	0	0	1	0	0	1	0	0	1	0	0	0	0	0	0
890	91	Male	Bagno a Ripoli	1	4.90959	1	0	0	0	1	1	0	0	0	0	0	0	0	0	0
891	80	Female	Bagno a Ripoli	1	8.34795	0	0	1	1	1	0	0	0	0	0	0	0	0	0	0
892	48	Female	Bagno a Ripoli	0	18.0685	0	0	0	0	0	0	0	0	0	0	0	0	0	0	0
893	77	Female	Bagno a Ripoli	0	18.5233	1	1	1	0	0	0	0	0	0	0	0	0	0	0	0
894	67	Male	Bagno a Ripoli	1	9.78356	0	0	0	0	0	0	0	0	1	0	0	0	0	0	0
895	66	Male	Bagno a Ripoli	0	18.4521	1	0	0	0	0	0	0	0	0	0	0	0	0	0	0
896	55	Male	Bagno a Ripoli	0	18.2685	0	0	0	0	0	0	0	0	0	0	0	0	0	0	0
897	76	Male	Bagno a Ripoli	0	18.4082	0	0	0	0	0	0	0	0	0	0	0	0	0	0	0
898	70	Female	Bagno a Ripoli	1	18.1644	0	0	0	0	0	0	0	0	0	0	0	0	0	0	0
899	73	Female	Bagno a Ripoli	1	12.8932	0	0	0	0	0	0	0	0	0	0	0	0	0	0	0
900	88	Male	Bagno a Ripoli	1	12.7863	1	0	1	1	1	0	1	0	1	0	0	0	0	0	0
901	77	Female	Bagno a Ripoli	1	16.3973	1	0	0	0	0	0	0	0	0	0	0	0	0	0	0
902	74	Female	Bagno a Ripoli	1	13.3479	1	0	1	0	0	0	1	0	0	0	0	0	0	0	0
903	88	Female	Bagno a Ripoli	1	3.68219	1	0	0	0	0	0	0	0	0	0	0	0	0	0	0
904	73	Male	Bagno a Ripoli	1	9.9863	0	0	0	0	0	0	0	0	0	0	0	0	0	0	0
905	60	Female	Bagno a Ripoli	0	18.0849	0	0	0	0	0	0	0	0	0	0	0	0	0	0	0
906	82	Female	Bagno a Ripoli	1	10.2658	0	1	0	0	0	0	0	0	0	0	0	0	0	0	0
907	69	Male	Bagno a Ripoli	1	11.7233	1	0	0	0	0	0	0	0	0	0	0	0	0	0	0
908	73	Male	Bagno a Ripoli	1	10.5014	0	0	0	0	0	0	0	0	0	0	0	0	0	0	0
909	71	Male	Bagno a Ripoli	1	15.4877	0	0	0	0	0	0	0	0	0	0	0	0	0	0	0
910	24	Female	Bagno a Ripoli	0	18.3068	0	0	0	0	0	0	0	0	0	0	0	0	0	0	0
911	48	Female	Bagno a Ripoli	0	18.2192	0	0	0	0	0	0	1	0	0	0	0	0	0	0	0
912	23	Female	Bagno a Ripoli	0	18.0959	0	1	0	0	0	0	0	0	0	0	0	0	0	0	0
913	68	Female	Bagno a Ripoli	0	18.5205	0	1	0	0	0	0	0	0	0	0	0	0	0	0	0
914	67	Male	Bagno a Ripoli	0	18.463	0	0	0	0	0	0	0	0	0	0	0	0	0	0	0
915	93	Female	Bagno a Ripoli	1	5.29589	0	0	1	0	0	0	0	0	0	0	0	0	0	0	0
916	83	Female	Bagno a Ripoli	1	15.9753	1	0	0	0	0	0	0	0	0	0	0	0	0	0	0
917	66	Male	Bagno a Ripoli	0	18.3178	0	0	0	0	0	0	0	0	0	0	0	0	0	0	0
918	68	Female	Bagno a Ripoli	0	18.4411	0	0	1	0	0	1	0	0	0	0	0	0	0	0	0
919	68	Male	Bagno a Ripoli	1	11.2521	0	0	0	0	0	0	0	0	0	0	0	0	0	0	0
920	77	Female	Bagno a Ripoli	1	8.57534	0	1	1	0	1	0	0	0	0	0	0	0	0	0	0
921	68	Male	Bagno a Ripoli	0	18.4658	0	0	0	0	0	0	0	1	1	0	0	0	0	0	0
922	75	Male	Bagno a Ripoli	0	18.0986	1	0	0	0	0	0	0	1	0	0	0	0	0	0	0
923	87	Female	Bagno a Ripoli	1	4.43836	1	0	1	0	1	0	0	0	0	0	0	1	1	1	0
924	83	Male	Bagno a Ripoli	1	4.3726	0	0	1	0	0	0	0	0	0	0	0	0	0	0	0
925	73	Female	Bagno a Ripoli	1	12.1945	0	0	0	0	1	0	0	0	0	0	0	0	0	0	0
926	75	Male	Bagno a Ripoli	1	9.25205	1	1	1	0	1	0	0	0	0	0	0	0	0	0	0
927	79	Female	Bagno a Ripoli	0	18.2247	0	0	0	0	0	0	0	1	0	0	0	0	0	0	0
928	66	Female	Bagno a Ripoli	0	18.4877	1	0	0	0	0	0	0	0	0	1	0	0	0	0	0
929	66	Male	Bagno a Ripoli	1	13.5479	1	0	0	0	0	0	0	0	0	0	0	0	0	0	0
930	51	Male	Bagno a Ripoli	1	8.67671	1	0	0	0	0	0	0	0	0	0	0	0	0	0	0
931	80	Male	Bagno a Ripoli	1	11.3014	0	0	0	0	0	0	0	0	0	0	0	0	0	0	0
932	71	Male	Bagno a Ripoli	1	11.7233	0	1	0	0	0	0	0	0	0	0	0	0	0	0	0
933	75	Female	Bagno a Ripoli	1	3.64384	1	1	0	0	0	0	0	0	0	0	0	1	0	0	0
934	68	Male	Bagno a Ripoli	0	18.1562	0	0	0	0	0	0	0	0	0	0	0	0	1	0	0
935	30	Female	Bagno a Ripoli	0	18.1671	0	0	0	0	0	0	0	0	0	0	0	0	0	0	0
936	76	Male	Bagno a Ripoli	0	18.2384	0	0	0	0	0	0	0	0	0	0	0	0	0	0	0
937	40	Male	Bagno a Ripoli	0	18.2384	0	0	0	0	0	0	0	0	0	0	0	0	0	0	0
938	89	Female	Bagno a Ripoli	1	3.15342	0	0	1	1	0	0	0	0	0	0	0	0	0	0	0
939	73	Female	Bagno a Ripoli	0	18.3397	1	0	0	0	0	0	0	0	0	0	0	0	0	0	0
940	56	Female	Bagno a Ripoli	0	18.3973	0	1	0	0	0	0	0	0	0	0	0	0	0	0	0
941	94	Male	Bagno a Ripoli	1	4.45205	0	1	1	0	0	1	0	0	0	0	0	0	0	0	0
942	85	Female	Bagno a Ripoli	1	14.0658	1	0	0	0	0	0	0	0	0	0	0	0	0	0	0
943	65	Male	Bagno a Ripoli	1	16.5479	1	0	0	0	0	0	0	0	0	0	0	0	0	0	0
944	88	Female	Bagno a Ripoli	1	14.3973	1	1	1	0	0	0	0	0	0	0	0	0	0	0	0
945	66	Female	Bagno a Ripoli	0	18.6521	1	0	0	0	1	0	0	0	0	0	0	0	0	0	0
946	69	Male	Bagno a Ripoli	1	16.6164	0	0	0	0	0	0	1	0	0	0	0	0	0	0	0
947	66	Male	Bagno a Ripoli	1	18.3014	0	0	0	0	0	0	0	0	0	0	0	0	0	0	0
948	24	Male	Bagno a Ripoli	0	18.2219	0	0	0	0	0	0	0	0	0	0	0	0	0	0	0
949	62	Male	Bagno a Ripoli	0	18.2329	1	0	0	0	0	0	0	0	0	0	0	0	0	0	0
950	81	Female	Bagno a Ripoli	0	18.6219	1	0	0	0	0	1	0	0	0	0	0	0	0	0	0
951	73	Female	Bagno a Ripoli	0	18.6192	1	0	0	0	0	0	0	0	0	0	0	0	0	0	0
952	77	Female	Bagno a Ripoli	1	18.0548	1	1	1	0	1	0	0	0	0	0	0	0	0	0	0
953	76	Male	Bagno a Ripoli	0	18.3014	0	0	1	0	0	1	0	0	0	0	0	0	0	0	0
954	69	Female	Bagno a Ripoli	1	17.9863	0	1	0	0	0	0	0	0	0	0	0	0	0	0	0
955	59	Female	Bagno a Ripoli	0	18.6603	0	0	0	0	0	0	0	0	0	0	0	0	0	0	0
956	74	Female	Bagno a Ripoli	0	18.4795	0	1	0	0	0	0	0	0	0	0	0	0	0	0	0
957	64	Female	Bagno a Ripoli	0	18.2685	0	0	0	0	0	0	0	0	0	0	0	0	0	0	0
958	77	Female	Bagno a Ripoli	1	7.66301	1	0	0	0	0	0	0	0	1	0	0	0	0	0	0
959	67	Female	Bagno a Ripoli	1	6.3863	1	0	1	0	0	0	0	0	0	0	0	0	0	0	0
960	43	Female	Bagno a Ripoli	0	18.1452	0	0	0	0	0	0	0	0	0	0	0	0	0	0	0
961	70	Male	Bagno a Ripoli	0	18.5041	1	0	0	1	0	0	0	1	0	0	0	0	0	0	0
962	91	Male	Bagno a Ripoli	1	5.9863	1	0	1	0	0	1	0	0	0	0	0	0	0	0	0
963	35	Male	Bagno a Ripoli	0	18.0329	0	0	0	0	0	0	0	0	0	0	0	0	0	0	0
964	77	Female	Bagno a Ripoli	1	13.2164	0	0	0	0	0	0	0	0	0	0	0	0	0	0	0
965	83	Female	Bagno a Ripoli	1	12.1315	0	1	0	0	0	0	0	0	0	0	0	0	0	0	0
966	68	Female	Bagno a Ripoli	0	18.2548	1	0	0	0	0	0	0	0	0	1	0	0	0	0	0
967	77	Female	Bagno a Ripoli	0	18.6055	1	0	0	0	0	1	0	0	0	0	0	0	0	0	0
968	69	Male	Bagno a Ripoli	0	18.3507	1	0	0	0	0	0	0	0	0	0	0	0	0	0	0
969	40	Male	Bagno a Ripoli	0	18.0877	0	0	0	0	0	0	0	0	0	0	0	0	0	0	0
970	83	Male	Bagno a Ripoli	1	4.36712	1	0	0	0	0	0	1	0	1	1	0	0	0	0	0
971	86	Female	Bagno a Ripoli	1	8.30685	0	1	0	0	0	0	0	0	0	0	0	0	0	0	0
972	27	Male	Bagno a Ripoli	0	18.0986	0	0	0	0	0	0	0	0	0	0	0	0	0	0	0
973	81	Male	Bagno a Ripoli	1	10.4219	0	0	0	0	0	0	0	1	0	0	0	0	0	0	0
974	42	Female	Bagno a Ripoli	0	18.6521	0	0	0	0	0	0	0	0	0	0	0	0	0	0	0
975	81	Male	Bagno a Ripoli	1	8.52603	0	0	1	0	0	0	0	0	0	0	0	0	0	0	0
976	41	Male	Bagno a Ripoli	0	18.6795	0	0	0	1	0	0	0	0	0	0	0	0	0	0	0
977	76	Male	Bagno a Ripoli	1	13.3808	0	0	0	0	0	1	0	0	0	0	0	0	0	0	0
978	41	Male	Bagno a Ripoli	0	18.5014	0	0	0	0	0	0	0	0	0	0	0	0	0	0	0
979	76	Male	Bagno a Ripoli	1	13.0274	1	0	0	1	0	0	0	0	0	1	0	0	1	0	0
980	72	Male	Bagno a Ripoli	0	18.2904	1	1	1	0	0	0	0	0	0	0	0	0	0	0	0
981	85	Male	Bagno a Ripoli	1	14.0795	0	0	1	0	0	0	0	1	0	0	0	0	0	0	0
982	27	Male	Bagno a Ripoli	0	18.0822	0	0	0	0	0	0	0	0	0	0	0	0	0	0	0
983	71	Male	Bagno a Ripoli	1	13.9014	0	0	0	0	0	0	0	0	0	0	0	0	0	0	0
984	43	Male	Bagno a Ripoli	0	18.1863	0	0	0	0	0	0	0	0	0	0	0	0	0	0	0
985	80	Female	Bagno a Ripoli	1	16.1534	0	0	0	0	1	0	0	1	0	0	0	0	0	0	0
986	70	Female	Bagno a Ripoli	1	8.23562	1	0	1	1	0	0	0	0	0	0	0	0	0	0	0
987	73	Male	Bagno a Ripoli	1	13.2795	1	0	0	0	0	0	0	0	0	0	0	0	1	0	0
988	75	Female	Bagno a Ripoli	1	7.09863	1	0	0	0	0	1	0	0	0	1	0	0	0	0	0
989	39	Female	Bagno a Ripoli	0	19.0411	0	0	0	0	0	0	0	0	0	0	0	0	0	0	0
990	66	Male	Bagno a Ripoli	0	18.0411	0	0	0	0	0	0	0	0	0	0	0	0	0	0	0
991	69	Female	Bagno a Ripoli	1	8.73425	1	0	0	0	0	0	0	0	0	0	0	0	0	0	1
992	57	Male	Bagno a Ripoli	0	18.1973	0	0	0	0	0	0	0	0	0	0	0	0	0	0	0
993	79	Male	Bagno a Ripoli	1	11.1151	1	0	0	0	0	0	0	0	0	0	0	0	0	0	0
994	71	Male	Bagno a Ripoli	0	18.1562	0	1	0	0	0	0	0	0	0	0	0	0	0	0	0
995	73	Female	Bagno a Ripoli	1	14.2603	1	0	0	0	0	0	0	0	0	0	0	0	0	0	0
996	76	Female	Bagno a Ripoli	1	15.4685	1	0	0	0	0	0	0	0	0	0	0	0	0	0	0
997	28	Male	Bagno a Ripoli	0	18.5233	0	0	0	0	0	0	1	0	0	0	0	0	0	0	0
